# Supplementary material
Source: PubMed Central journal article supplement (PMC3910141)

Database... 070909ipiHUMANv361Processed.fasta

Filter(s)... None

Mods: (M\* +15.99492) C=161.01468

| Reference Scan(s)                                             | Sequence | MH+     | z | P<br>P | Score<br>XC | Coverage<br>DeltaCn | Accession<br>RSp | Ions    |
|---------------------------------------------------------------|----------|---------|---|--------|-------------|---------------------|------------------|---------|
| IPI:IPI00022463.1 SWISS-PROT:P02787 TRMBL:A0PJA6;B4DEX9;B4DHZ |          |         |   | 1e-007 | 22.2        | 0.0                 | 0                |         |
| 19287468 - 1R.WCAVSEHEATK.C                                   |          | 1318.57 | 2 | 1e-007 | 4.487       | 0.529               | 1202.0           | 1 20/30 |
| 19287468 - 1K.SKEFQLFSSPHGK.D                                 |          | 1491.76 | 3 | 8e-007 | 4.643       | 0.609               | 849.7            | 1 27/72 |
| 19287468 - 1K.KASYLDCIR.A                                     |          | 1126.56 | 2 | 0.06   | 1.175       | 0.496               | 163.9            | 4 10/24 |
| 3 of 3 peptide matches reported, 0 removed due to filtering   |          |         |   |        |             |                     |                  |         |
| IPI:IPI00877763.1 VEGA:OTTHUMP0000                            |          |         |   | 1e-007 | 12.2        | 0.0                 | 0                |         |
| 19287468 - 1R.WCAVSEHEATK.C                                   |          | 1318.57 | 2 | 1e-007 | 4.487       | 0.529               | 1202.0           | 1 20/30 |
| 19287468 - 1K.KASYLDCIR.A                                     |          | 1126.56 | 2 | 0.06   | 1.175       | -                   | 163.9            | 4 10/24 |
| 2 of 2 peptide matches reported, 0 removed due to filtering   |          |         |   |        |             |                     |                  |         |
| IPI:IPI00879916.1 VEGA:OTTHUMP0000                            |          |         |   | 1e-007 | 10.2        | 0.0                 | 0                |         |
| 19287468 - 1R.WCAVSEHEATK.C                                   |          | 1318.57 | 2 | 1e-007 | 4.487       | 0.529               | 1202.0           | 1 20/30 |
| 1 of 1 peptide matches reported, 0 removed due to filtering   |          |         |   |        |             |                     |                  |         |
| IPI:IPI00791330.1 VEGA:OTTHUMP0000                            |          |         |   | 8e-007 | 10.2        | 0.0                 | 0                |         |
| 19287468 - 1K.SKEFQLFSSPHGK.D                                 |          | 1491.76 | 3 | 8e-007 | 4.643       | 0.609               | 849.7            | 1 27/72 |
| 1 of 1 peptide matches reported, 0 removed due to filtering   |          |         |   |        |             |                     |                  |         |
| IPI:IPI00792626.1 VEGA:OTTHUMP0000                            |          |         |   | 8e-007 | 10.2        | 0.0                 | 0                |         |
| 19287468 - 1K.SKEFQLFSSPHGK.D                                 |          | 1491.76 | 3 | 8e-007 | 4.643       | 0.609               | 849.7            | 1 27/72 |
| 1 of 1 peptide matches reported, 0 removed due to filtering   |          |         |   |        |             |                     |                  |         |
| IPI:IPI00798430.2 VEGA:OTTHUMP0000                            |          |         |   | 8e-007 | 10.2        | 0.0                 | 0                |         |
| 19287468 - 1K.SKEFQLFSSPHGK.D                                 |          | 1491.76 | 3 | 8e-007 | 4.643       | 0.609               | 849.7            | 1 27/72 |
| 1 of 1 peptide matches reported, 0 removed due to filtering   |          |         |   |        |             |                     |                  |         |
| IPI:IPI00305461.3 SWISS-PROT:P19823 TRMBL:A2RTY6 ENSEMBL:ENSP |          |         |   | 1e-006 | 10.2        | 0.0                 | 0                |         |
| 2118291816 -R.LSNENHGIAQR.I                                   |          | 1238.62 | 2 | 1e-006 | 4.292       | 0.485               | 789.7            | 1 18/30 |
| 1 of 1 peptide matches reported, 0 removed due to filtering   |          |         |   |        |             |                     |                  |         |
| IPI:IPI00645038.1 TRMBL:Q5T985 EN                             |          |         |   | 1e-006 | 10.2        | 0.0                 | 0                |         |
| 2118291816 -R.LSNENHGIAQR.I                                   |          | 1238.62 | 2 | 1e-006 | 4.292       | 0.485               | 789.7            | 1 18/30 |
| 1 of 1 peptide matches reported, 0 removed due to filtering   |          |         |   |        |             |                     |                  |         |
| IPI:IPI00910636.1 TRMBL:B4DM79 Ta                             |          |         |   | 1e-006 | 10.2        | 0.0                 | 0                |         |
| 2118291816 -R.LSNENHGIAQR.I                                   |          | 1238.62 | 2 | 1e-006 | 4.292       | 0.485               | 789.7            | 1 18/30 |
| 1 of 1 peptide matches reported, 0 removed due to filtering   |          |         |   |        |             |                     |                  |         |
| IPI:IPI00017601.1 SWISS-PROT:P00450 TRMBL:A5PL27;A8K5A4;B7Z5Q |          |         |   | 1e-006 | 20.2        | 0.0                 | 0                |         |
| 19287468 - 1K.ALYLQYTDETFR.T                                  |          | 1519.74 | 2 | 1e-006 | 4.725       | 0.473               | 1101.8           | 1 20/33 |
| 2118291816 -K.VNKDDEFIESNK.M                                  |          | 1566.73 | 3 | 3e-005 | 3.718       | 0.554               | 800.2            | 1 25/72 |
| 2 of 2 peptide matches reported, 0 removed due to filtering   |          |         |   |        |             |                     |                  |         |
| IPI:IPI00879084.1 VEGA:OTTHUMP0000                            |          |         |   | 1e-006 | 10.2        | 0.0                 | 0                |         |
| 19287468 - 1K.ALYLQYTDETFR.T                                  |          | 1519.74 | 2 | 1e-006 | 4.725       | 0.473               | 1101.8           | 1 20/33 |
| 1 of 1 peptide matches reported, 0 removed due to filtering   |          |         |   |        |             |                     |                  |         |
| IPI:IPI00916434.1 TRMBL:A2KBB9;A2                             |          |         |   | 1e-006 | 20.2        | 0.0                 | 0                |         |
| 19287468 - 1R.FSGSGSGTDFTLTISR.L                              |          | 1632.79 | 2 | 1e-006 | 3.219       | 0.589               | 674.9            | 1 19/45 |
| 19287468 - 1K.NTLYLQMNLSR.A                                   |          | 1352.70 | 2 | 3e-006 | 4.027       | 0.643               | 1526.5           | 1 20/30 |
| 2 of 2 peptide matches reported, 0 removed due to filtering   |          |         |   |        |             |                     |                  |         |

|                                                                |         |   |        |       |       |        |   |       |
|----------------------------------------------------------------|---------|---|--------|-------|-------|--------|---|-------|
| IPI:IPI00929201.1 TREMBL:A2KBC2;A2                             |         |   | 1e-006 | 20.2  | 0.0   | 0      |   |       |
| 19287468 - 1R.FSGSGSGTDFTLTISR.L                               | 1632.79 | 2 | 1e-006 | 3.219 | 0.589 | 674.9  | 1 | 19/45 |
| 19287468 - 1K.NTLYLQMNLSR.A                                    | 1352.70 | 2 | 3e-006 | 4.027 | 0.643 | 1526.5 | 1 | 20/30 |
| 2 of 2 peptide matches reported, 0 removed due to filtering    |         |   |        |       |       |        |   |       |
| IPI:IPI00784985.1 TREMBL:Q6PJF2 Ta                             |         |   | 1e-006 | 20.2  | 0.0   | 0      |   |       |
| 19287468 - 1R.FSGSGSGTDFTLTISR.L                               | 1632.79 | 2 | 1e-006 | 3.219 | 0.589 | 674.9  | 1 | 19/45 |
| 19287468 - 1K.SGTASVVCLLNIFYPR.E                               | 1798.88 | 2 | 5e-005 | 3.485 | 0.433 | 766.8  | 1 | 17/45 |
| 2 of 2 peptide matches reported, 0 removed due to filtering    |         |   |        |       |       |        |   |       |
| IPI:IPI00889156.1 TREMBL:Q15537;Q6                             |         |   | 1e-006 | 20.2  | 0.0   | 0      |   |       |
| 19287468 - 1R.FSGSGSGTDFTLTISR.L                               | 1632.79 | 2 | 1e-006 | 3.219 | 0.589 | 674.9  | 1 | 19/45 |
| 19287468 - 1K.SGTASVVCLLNIFYPR.E                               | 1798.88 | 2 | 5e-005 | 3.485 | 0.433 | 766.8  | 1 | 17/45 |
| 2 of 2 peptide matches reported, 0 removed due to filtering    |         |   |        |       |       |        |   |       |
| IPI:IPI00030205.3 SWISS-PROT:P18135 ENSEMBL:ENSP00000374790 VE |         |   | 1e-006 | 10.2  | 0.0   | 0      |   |       |
| 19287468 - 1R.FSGSGSGTDFTLTISR.L                               | 1632.79 | 2 | 1e-006 | 3.219 | 0.589 | 674.9  | 1 | 19/45 |
| 1 of 1 peptide matches reported, 0 removed due to filtering    |         |   |        |       |       |        |   |       |
| IPI:IPI00384576.1 SWISS-PROT:P1813                             |         |   | 1e-006 | 10.2  | 0.0   | 0      |   |       |
| 19287468 - 1R.FSGSGSGTDFTLTISR.L                               | 1632.79 | 2 | 1e-006 | 3.219 | 0.589 | 674.9  | 1 | 19/45 |
| 1 of 1 peptide matches reported, 0 removed due to filtering    |         |   |        |       |       |        |   |       |
| IPI:IPI00385252.1 SWISS-PROT:P0420                             |         |   | 1e-006 | 10.2  | 0.0   | 0      |   |       |
| 19287468 - 1R.FSGSGSGTDFTLTISR.L                               | 1632.79 | 2 | 1e-006 | 3.219 | 0.589 | 674.9  | 1 | 19/45 |
| 1 of 1 peptide matches reported, 0 removed due to filtering    |         |   |        |       |       |        |   |       |
| IPI:IPI00387115.1 SWISS-PROT:P0162                             |         |   | 1e-006 | 10.2  | 0.0   | 0      |   |       |
| 19287468 - 1R.FSGSGSGTDFTLTISR.L                               | 1632.79 | 2 | 1e-006 | 3.219 | 0.589 | 674.9  | 1 | 19/45 |
| 1 of 1 peptide matches reported, 0 removed due to filtering    |         |   |        |       |       |        |   |       |
| IPI:IPI00387117.5 SWISS-PROT:P0162                             |         |   | 1e-006 | 10.2  | 0.0   | 0      |   |       |
| 19287468 - 1R.FSGSGSGTDFTLTISR.L                               | 1632.79 | 2 | 1e-006 | 3.219 | 0.589 | 674.9  | 1 | 19/45 |
| 1 of 1 peptide matches reported, 0 removed due to filtering    |         |   |        |       |       |        |   |       |
| IPI:IPI00387118.1 SWISS-PROT:P0162                             |         |   | 1e-006 | 10.2  | 0.0   | 0      |   |       |
| 19287468 - 1R.FSGSGSGTDFTLTISR.L                               | 1632.79 | 2 | 1e-006 | 3.219 | 0.589 | 674.9  | 1 | 19/45 |
| 1 of 1 peptide matches reported, 0 removed due to filtering    |         |   |        |       |       |        |   |       |
| IPI:IPI00827510.1 TREMBL:A2IPI5 Ta                             |         |   | 1e-006 | 10.2  | 0.0   | 0      |   |       |
| 19287468 - 1R.FSGSGSGTDFTLTISR.L                               | 1632.79 | 2 | 1e-006 | 3.219 | 0.589 | 674.9  | 1 | 19/45 |
| 1 of 1 peptide matches reported, 0 removed due to filtering    |         |   |        |       |       |        |   |       |
| IPI:IPI00827560.1 TREMBL:A2IPI2;A2                             |         |   | 1e-006 | 10.2  | 0.0   | 0      |   |       |
| 19287468 - 1R.FSGSGSGTDFTLTISR.L                               | 1632.79 | 2 | 1e-006 | 3.219 | 0.589 | 674.9  | 1 | 19/45 |
| 1 of 1 peptide matches reported, 0 removed due to filtering    |         |   |        |       |       |        |   |       |
| IPI:IPI00827637.1 TREMBL:A2NXP9 Ta                             |         |   | 1e-006 | 10.2  | 0.0   | 0      |   |       |
| 19287468 - 1R.FSGSGSGTDFTLTISR.L                               | 1632.79 | 2 | 1e-006 | 3.219 | 0.589 | 674.9  | 1 | 19/45 |
| 1 of 1 peptide matches reported, 0 removed due to filtering    |         |   |        |       |       |        |   |       |
| IPI:IPI00854644.2 TREMBL:A6NLY3 EN                             |         |   | 1e-006 | 10.2  | 0.0   | 0      |   |       |
| 19287468 - 1R.FSGSGSGTDFTLTISR.L                               | 1632.79 | 2 | 1e-006 | 3.219 | 0.589 | 674.9  | 1 | 19/45 |
| 1 of 1 peptide matches reported, 0 removed due to filtering    |         |   |        |       |       |        |   |       |
| IPI:IPI00885193.1 TREMBL:Q9UL78 Ta                             |         |   | 1e-006 | 10.2  | 0.0   | 0      |   |       |
| 19287468 - 1R.FSGSGSGTDFTLTISR.L                               | 1632.79 | 2 | 1e-006 | 3.219 | 0.589 | 674.9  | 1 | 19/45 |

1 of 1 peptide matches reported, 0 removed due to filtering

IPI:IPI00022426.1|SWISS-PROT:P02760|TRMBL:P78492|ENSEMBL:ENSP 1e-006 10.2 0.0 0  
19287468 - 1R.AFIQLWAFDAVK.G 1408.76 2 1e-006 3.585 0.380 1474.7 1 21/33

1 of 1 peptide matches reported, 0 removed due to filtering

IPI:IPI00022371.1|SWISS-PROT:P04196|TRMBL:B2R8I2;B9EK35;Q68DR 2e-006 10.1 0.0 0  
19287468 - 1R.ADLFYDVEALDLESPK.N 1824.89 2 2e-006 2.497 0.458 790.6 1 18/45

1 of 1 peptide matches reported, 0 removed due to filtering

IPI:IPI00828156.1|TRMBL:A2NKM6 Ta 3e-006 20.2 0.0 0  
19287468 - 1K.NTLYLQMNLSLR.A 1352.70 2 3e-006 4.027 0.643 1526.5 1 20/30  
2118291816 -R.LSCAASGFTFR.S 1217.56 2 6e-006 3.492 0.654 1231.4 1 20/30

2 of 2 peptide matches reported, 0 removed due to filtering

IPI:IPI00383887.1|TRMBL:Q9UGP3 Tax\_Id=9606 Gene\_Symbol=- Immu 3e-006 10.2 0.0 0  
19287468 - 1K.NTLYLQMNLSLR.A 1352.70 2 3e-006 4.027 0.643 1526.5 1 20/30

1 of 1 peptide matches reported, 0 removed due to filtering

IPI:IPI00384392.1|TRMBL:Q9UL72 Ta 3e-006 10.2 0.0 0  
19287468 - 1K.NTLYLQMNLSLR.A 1352.70 2 3e-006 4.027 0.643 1526.5 1 20/30

1 of 1 peptide matches reported, 0 removed due to filtering

IPI:IPI00413194.1|TRMBL:Q9UL93 Ta 3e-006 10.2 0.0 0  
19287468 - 1K.NTLYLQMNLSLR.A 1352.70 2 3e-006 4.027 0.643 1526.5 1 20/30

1 of 1 peptide matches reported, 0 removed due to filtering

IPI:IPI00736507.2|TRMBL:Q0ZCG7;Q0 3e-006 10.2 0.0 0  
19287468 - 1K.NTLYLQMNLSLR.A 1352.70 2 3e-006 4.027 0.643 1526.5 1 20/30

1 of 1 peptide matches reported, 0 removed due to filtering

IPI:IPI00748665.3|TRMBL:A2J1N3;Q0 3e-006 10.2 0.0 0  
19287468 - 1K.NTLYLQMNLSLR.A 1352.70 2 3e-006 4.027 0.643 1526.5 1 20/30

1 of 1 peptide matches reported, 0 removed due to filtering

IPI:IPI00748998.1|TRMBL:Q65ZC9 Ta 3e-006 10.2 0.0 0  
19287468 - 1K.NTLYLQMNLSLR.A 1352.70 2 3e-006 4.027 0.643 1526.5 1 20/30

1 of 1 peptide matches reported, 0 removed due to filtering

IPI:IPI00760721.3|ENSEMBL:ENSP0000 3e-006 10.2 0.0 0  
19287468 - 1K.NTLYLQMNLSLR.A 1352.70 2 3e-006 4.027 0.643 1526.5 1 20/30

1 of 1 peptide matches reported, 0 removed due to filtering

IPI:IPI00783094.1|TRMBL:Q0ZCG4;Q0 3e-006 10.2 0.0 0  
19287468 - 1K.NTLYLQMNLSLR.A 1352.70 2 3e-006 4.027 0.643 1526.5 1 20/30

1 of 1 peptide matches reported, 0 removed due to filtering

IPI:IPI00783116.1|TRMBL:Q0ZCI5 Ta 3e-006 10.2 0.0 0  
19287468 - 1K.NTLYLQMNLSLR.A 1352.70 2 3e-006 4.027 0.643 1526.5 1 20/30

1 of 1 peptide matches reported, 0 removed due to filtering

IPI:IPI00783244.1|TRMBL:Q0ZCH1;Q0 3e-006 10.2 0.0 0  
19287468 - 1K.NTLYLQMNLSLR.A 1352.70 2 3e-006 4.027 0.643 1526.5 1 20/30

1 of 1 peptide matches reported, 0 removed due to filtering

---

|                                                                    |         |   |                  |               |              |             |   |       |
|--------------------------------------------------------------------|---------|---|------------------|---------------|--------------|-------------|---|-------|
| IPI:IPI00783393.1 TREMBL:Q0ZCI2 Ta<br>19287468 - 1K.NTLYLQMNLSLR.A | 1352.70 | 2 | 3e-006<br>3e-006 | 10.2<br>4.027 | 0.0<br>0.643 | 0<br>1526.5 | 1 | 20/30 |
| 1 of 1 peptide matches reported, 0 removed due to filtering        |         |   |                  |               |              |             |   |       |
| IPI:IPI00783818.1 TREMBL:Q0ZCJ1 Ta<br>19287468 - 1K.NTLYLQMNLSLR.A | 1352.70 | 2 | 3e-006<br>3e-006 | 10.2<br>4.027 | 0.0<br>0.643 | 0<br>1526.5 | 1 | 20/30 |
| 1 of 1 peptide matches reported, 0 removed due to filtering        |         |   |                  |               |              |             |   |       |
| IPI:IPI00783909.1 TREMBL:Q0ZCH0 Ta<br>19287468 - 1K.NTLYLQMNLSLR.A | 1352.70 | 2 | 3e-006<br>3e-006 | 10.2<br>4.027 | 0.0<br>0.643 | 0<br>1526.5 | 1 | 20/30 |
| 1 of 1 peptide matches reported, 0 removed due to filtering        |         |   |                  |               |              |             |   |       |
| IPI:IPI00784513.1 TREMBL:Q0ZCI3 Ta<br>19287468 - 1K.NTLYLQMNLSLR.A | 1352.70 | 2 | 3e-006<br>3e-006 | 10.2<br>4.027 | 0.0<br>0.643 | 0<br>1526.5 | 1 | 20/30 |
| 1 of 1 peptide matches reported, 0 removed due to filtering        |         |   |                  |               |              |             |   |       |
| IPI:IPI00827581.1 TREMBL:A2NZ55 Ta<br>19287468 - 1K.NTLYLQMNLSLR.A | 1352.70 | 2 | 3e-006<br>3e-006 | 10.2<br>4.027 | 0.0<br>0.643 | 0<br>1526.5 | 1 | 20/30 |
| 1 of 1 peptide matches reported, 0 removed due to filtering        |         |   |                  |               |              |             |   |       |
| IPI:IPI00827589.1 TREMBL:A2NXP8 Ta<br>19287468 - 1K.NTLYLQMNLSLR.A | 1352.70 | 2 | 3e-006<br>3e-006 | 10.2<br>4.027 | 0.0<br>0.643 | 0<br>1526.5 | 1 | 20/30 |
| 1 of 1 peptide matches reported, 0 removed due to filtering        |         |   |                  |               |              |             |   |       |
| IPI:IPI00827678.1 TREMBL:A2NWX5 Ta<br>19287468 - 1K.NTLYLQMNLSLR.A | 1352.70 | 2 | 3e-006<br>3e-006 | 10.2<br>4.027 | 0.0<br>0.643 | 0<br>1526.5 | 1 | 20/30 |
| 1 of 1 peptide matches reported, 0 removed due to filtering        |         |   |                  |               |              |             |   |       |
| IPI:IPI00827814.1 TREMBL:A2NWX1 Ta<br>19287468 - 1K.NTLYLQMNLSLR.A | 1352.70 | 2 | 3e-006<br>3e-006 | 10.2<br>4.027 | 0.0<br>0.643 | 0<br>1526.5 | 1 | 20/30 |
| 1 of 1 peptide matches reported, 0 removed due to filtering        |         |   |                  |               |              |             |   |       |
| IPI:IPI00827929.1 TREMBL:A2NWW9 Ta<br>19287468 - 1K.NTLYLQMNLSLR.A | 1352.70 | 2 | 3e-006<br>3e-006 | 10.2<br>4.027 | 0.0<br>0.643 | 0<br>1526.5 | 1 | 20/30 |
| 1 of 1 peptide matches reported, 0 removed due to filtering        |         |   |                  |               |              |             |   |       |
| IPI:IPI00827938.1 TREMBL:A2NWW5 Ta<br>19287468 - 1K.NTLYLQMNLSLR.A | 1352.70 | 2 | 3e-006<br>3e-006 | 10.2<br>4.027 | 0.0<br>0.643 | 0<br>1526.5 | 1 | 20/30 |
| 1 of 1 peptide matches reported, 0 removed due to filtering        |         |   |                  |               |              |             |   |       |
| IPI:IPI00827940.1 SWISS-PROT:P0176<br>19287468 - 1K.NTLYLQMNLSLR.A | 1352.70 | 2 | 3e-006<br>3e-006 | 10.2<br>4.027 | 0.0<br>0.643 | 0<br>1526.5 | 1 | 20/30 |
| 1 of 1 peptide matches reported, 0 removed due to filtering        |         |   |                  |               |              |             |   |       |
| IPI:IPI00827989.1 TREMBL:A2NWW6 Ta<br>19287468 - 1K.NTLYLQMNLSLR.A | 1352.70 | 2 | 3e-006<br>3e-006 | 10.2<br>4.027 | 0.0<br>0.643 | 0<br>1526.5 | 1 | 20/30 |
| 1 of 1 peptide matches reported, 0 removed due to filtering        |         |   |                  |               |              |             |   |       |
| IPI:IPI00828022.1 TREMBL:A2NWW7 Ta<br>19287468 - 1K.NTLYLQMNLSLR.A | 1352.70 | 2 | 3e-006<br>3e-006 | 10.2<br>4.027 | 0.0<br>0.643 | 0<br>1526.5 | 1 | 20/30 |
| 1 of 1 peptide matches reported, 0 removed due to filtering        |         |   |                  |               |              |             |   |       |
| IPI:IPI00828061.1 TREMBL:A2JA14 Ta<br>19287468 - 1K.NTLYLQMNLSLR.A | 1352.70 | 2 | 3e-006<br>3e-006 | 10.2<br>4.027 | 0.0<br>0.643 | 0<br>1526.5 | 1 | 20/30 |
| 1 of 1 peptide matches reported, 0 removed due to filtering        |         |   |                  |               |              |             |   |       |

---

|                                                                                                          |         |   |                  |               |              |             |   |        |
|----------------------------------------------------------------------------------------------------------|---------|---|------------------|---------------|--------------|-------------|---|--------|
| IPI:IPI00828085.1 TREMBL:A2NWW4 Ta<br>19287468 - 1K.NTLYLQMNLSLR.A                                       | 1352.70 | 2 | 3e-006<br>3e-006 | 10.2<br>4.027 | 0.0<br>0.643 | 0<br>1526.5 | 1 | 20/30  |
| 1 of 1 peptide matches reported, 0 removed due to filtering                                              |         |   |                  |               |              |             |   |        |
| IPI:IPI00828099.1 TREMBL:A2KUC3 Ta<br>19287468 - 1K.NTLYLQMNLSLR.A                                       | 1352.70 | 2 | 3e-006<br>3e-006 | 10.2<br>4.027 | 0.0<br>0.643 | 0<br>1526.5 | 1 | 20/30  |
| 1 of 1 peptide matches reported, 0 removed due to filtering                                              |         |   |                  |               |              |             |   |        |
| IPI:IPI00828105.1 TREMBL:A2J423 Ta<br>19287468 - 1K.NTLYLQMNLSLR.A                                       | 1352.70 | 2 | 3e-006<br>3e-006 | 10.2<br>4.027 | 0.0<br>0.643 | 0<br>1526.5 | 1 | 20/30  |
| 1 of 1 peptide matches reported, 0 removed due to filtering                                              |         |   |                  |               |              |             |   |        |
| IPI:IPI00828153.1 TREMBL:A2NWW1 Ta<br>19287468 - 1K.NTLYLQMNLSLR.A                                       | 1352.70 | 2 | 3e-006<br>3e-006 | 10.2<br>4.027 | 0.0<br>0.643 | 0<br>1526.5 | 1 | 20/30  |
| 1 of 1 peptide matches reported, 0 removed due to filtering                                              |         |   |                  |               |              |             |   |        |
| IPI:IPI00829724.1 TREMBL:A6NFFJ8 EN<br>19287468 - 1K.NTLYLQMNLSLR.A                                      | 1352.70 | 2 | 3e-006<br>3e-006 | 10.2<br>4.027 | 0.0<br>0.643 | 0<br>1526.5 | 1 | 20/30  |
| 1 of 1 peptide matches reported, 0 removed due to filtering                                              |         |   |                  |               |              |             |   |        |
| IPI:IPI00829747.2 ENSEMBL:ENSP0000<br>19287468 - 1K.NTLYLQMNLSLR.A                                       | 1352.70 | 2 | 3e-006<br>3e-006 | 10.2<br>4.027 | 0.0<br>0.643 | 0<br>1526.5 | 1 | 20/30  |
| 1 of 1 peptide matches reported, 0 removed due to filtering                                              |         |   |                  |               |              |             |   |        |
| IPI:IPI00829806.1 TREMBL:Q0ZCH8;Q0<br>19287468 - 1K.NTLYLQMNLSLR.A                                       | 1352.70 | 2 | 3e-006<br>3e-006 | 10.2<br>4.027 | 0.0<br>0.643 | 0<br>1526.5 | 1 | 20/30  |
| 1 of 1 peptide matches reported, 0 removed due to filtering                                              |         |   |                  |               |              |             |   |        |
| IPI:IPI00829976.1 TREMBL:A2N192 EN<br>19287468 - 1K.NTLYLQMNLSLR.A                                       | 1352.70 | 2 | 3e-006<br>3e-006 | 10.2<br>4.027 | 0.0<br>0.643 | 0<br>1526.5 | 1 | 20/30  |
| 1 of 1 peptide matches reported, 0 removed due to filtering                                              |         |   |                  |               |              |             |   |        |
| IPI:IPI00830088.1 ENSEMBL:ENSP0000<br>19287468 - 1K.NTLYLQMNLSLR.A                                       | 1352.70 | 2 | 3e-006<br>3e-006 | 10.2<br>4.027 | 0.0<br>0.643 | 0<br>1526.5 | 1 | 20/30  |
| 1 of 1 peptide matches reported, 0 removed due to filtering                                              |         |   |                  |               |              |             |   |        |
| IPI:IPI00854707.1 TREMBL:A2J1M5;Q0<br>19287468 - 1K.NTLYLQMNLSLR.A                                       | 1352.70 | 2 | 3e-006<br>3e-006 | 10.2<br>4.027 | 0.0<br>0.643 | 0<br>1526.5 | 1 | 20/30  |
| 1 of 1 peptide matches reported, 0 removed due to filtering                                              |         |   |                  |               |              |             |   |        |
| IPI:IPI00873155.2 TREMBL:A6NG04 EN<br>19287468 - 1K.NTLYLQMNLSLR.A                                       | 1352.70 | 2 | 3e-006<br>3e-006 | 10.2<br>4.027 | 0.0<br>0.643 | 0<br>1526.5 | 1 | 20/30  |
| 1 of 1 peptide matches reported, 0 removed due to filtering                                              |         |   |                  |               |              |             |   |        |
| IPI:IPI00888191.1 REFSEQ:XP_001714<br>19287468 - 1K.NTLYLQMNLSLR.A                                       | 1352.70 | 2 | 3e-006<br>3e-006 | 10.2<br>4.027 | 0.0<br>0.643 | 0<br>1526.5 | 1 | 20/30  |
| 1 of 1 peptide matches reported, 0 removed due to filtering                                              |         |   |                  |               |              |             |   |        |
| IPI:IPI00888954.1 REFSEQ:XP_001717<br>19287468 - 1K.NTLYLQMNLSLR.A                                       | 1352.70 | 2 | 3e-006<br>3e-006 | 10.2<br>4.027 | 0.0<br>0.643 | 0<br>1526.5 | 1 | 20/30  |
| 1 of 1 peptide matches reported, 0 removed due to filtering                                              |         |   |                  |               |              |             |   |        |
| IPI:IPI00022432.1 SWISS-PROT:P02766 TREMBL:A6XMH1;Q53WY6;Q549C<br>19287468 - 1K.TSESGELHGLTTEEEFVEGIYK.V | 2455.15 | 3 | 3e-006<br>3e-006 | 10.3<br>5.015 | 0.0<br>0.570 | 0<br>946.8  | 1 | 30/126 |
| 1 of 1 peptide matches reported, 0 removed due to filtering                                              |         |   |                  |               |              |             |   |        |

|                                                                                                                           |                    |        |                            |                        |                       |                      |        |                |
|---------------------------------------------------------------------------------------------------------------------------|--------------------|--------|----------------------------|------------------------|-----------------------|----------------------|--------|----------------|
| IPI:IPI00646384.1 VEGA:OTTHUMP0000<br>19287468 - 1K.TSESGELHGLTTEEEFVEGIYK.V                                              | 2455.15            | 3      | 3e-006<br>3e-006           | 10.3<br>5.015          | 0.0<br>0.570          | 0<br>946.8           | 1      | 30/126         |
| 1 of 1 peptide matches reported, 0 removed due to filtering                                                               |                    |        |                            |                        |                       |                      |        |                |
| IPI:IPI00855916.1 TREMBL:A6XGL1 Ta<br>19287468 - 1K.TSESGELHGLTTEEEFVEGIYK.V                                              | 2455.15            | 3      | 3e-006<br>3e-006           | 10.3<br>5.015          | 0.0<br>0.570          | 0<br>946.8           | 1      | 30/126         |
| 1 of 1 peptide matches reported, 0 removed due to filtering                                                               |                    |        |                            |                        |                       |                      |        |                |
| IPI:IPI00423463.1 TREMBL:Q6N094 Ta<br>2118291816 -K.GPSVFFLAPSSK.S<br>2118291816 -R.LSCAASGFTFR.S                         | 1186.65<br>1217.56 | 2<br>2 | 6e-006<br>0.02<br>6e-006   | 20.2<br>2.948<br>3.492 | 0.0<br>0.348<br>0.654 | 0<br>465.0<br>1231.4 | 1<br>1 | 15/33<br>20/30 |
| 2 of 2 peptide matches reported, 0 removed due to filtering                                                               |                    |        |                            |                        |                       |                      |        |                |
| IPI:IPI00784842.1 TREMBL:Q6MZQ6 Ta<br>2118291816 -K.GPSVFFLAPSSK.S<br>2118291816 -R.LSCAASGFTFR.S                         | 1186.65<br>1217.56 | 2<br>2 | 6e-006<br>0.02<br>6e-006   | 20.2<br>2.948<br>3.492 | 0.0<br>0.348<br>0.654 | 0<br>465.0<br>1231.4 | 1<br>1 | 15/33<br>20/30 |
| 2 of 2 peptide matches reported, 0 removed due to filtering                                                               |                    |        |                            |                        |                       |                      |        |                |
| IPI:IPI00783023.1 TREMBL:Q0ZCI6 Ta<br>2118291816 -R.LSCAASGFTFR.S                                                         | 1217.56            | 2      | 6e-006<br>6e-006           | 10.2<br>3.492          | 0.0<br>0.654          | 0<br>1231.4          | 1      | 20/30          |
| 1 of 1 peptide matches reported, 0 removed due to filtering                                                               |                    |        |                            |                        |                       |                      |        |                |
| IPI:IPI00022391.1 SWISS-PROT:P02743 ENSEMBL:ENSP00000255040 RE<br>19287468 - 1R.VGEYSLYIGR.H                              | 1156.60            | 2      | 6e-006<br>6e-006           | 10.2<br>3.220          | 0.0<br>0.492          | 0<br>1273.1          | 1      | 18/27          |
| 1 of 1 peptide matches reported, 0 removed due to filtering                                                               |                    |        |                            |                        |                       |                      |        |                |
| IPI:IPI00166729.4 SWISS-PROT:P25311 ENSEMBL:ENSP00000292401 RE<br>2118291816 -R.YSLTYIYTGLSK.H                            | 1408.74            | 2      | 8e-006<br>8e-006           | 10.1<br>2.703          | 0.0<br>0.530          | 0<br>554.0           | 1      | 14/33          |
| 1 of 1 peptide matches reported, 0 removed due to filtering                                                               |                    |        |                            |                        |                       |                      |        |                |
| IPI:IPI00816309.1 TREMBL:A0JLQ0 Ta<br>2118291816 -R.YSLTYIYTGLSK.H                                                        | 1408.74            | 2      | 8e-006<br>8e-006           | 10.1<br>2.703          | 0.0<br>0.530          | 0<br>554.0           | 1      | 14/33          |
| 1 of 1 peptide matches reported, 0 removed due to filtering                                                               |                    |        |                            |                        |                       |                      |        |                |
| IPI:IPI00924948.1 VEGA:OTTHUMP0000<br>2118291816 -R.YSLTYIYTGLSK.H                                                        | 1408.74            | 2      | 8e-006<br>8e-006           | 10.1<br>2.703          | 0.0<br>0.530          | 0<br>554.0           | 1      | 14/33          |
| 1 of 1 peptide matches reported, 0 removed due to filtering                                                               |                    |        |                            |                        |                       |                      |        |                |
| IPI:IPI00292530.1 SWISS-PROT:P19827 TREMBL:A8K9N5;B7Z539;B7Z54<br>19682592 - 2R.GHMLENHVER.L                              | 1221.58            | 2      | 1e-005<br>1e-005           | 10.2<br>3.514          | 0.0<br>0.577          | 0<br>794.8           | 1      | 19/27          |
| 1 of 1 peptide matches reported, 0 removed due to filtering                                                               |                    |        |                            |                        |                       |                      |        |                |
| IPI:IPI00383338.1 TREMBL:Q9P1C5 VE<br>19682592 - 2R.GHMLENHVER.L                                                          | 1221.58            | 2      | 1e-005<br>1e-005           | 10.2<br>3.514          | 0.0<br>0.577          | 0<br>794.8           | 1      | 19/27          |
| 1 of 1 peptide matches reported, 0 removed due to filtering                                                               |                    |        |                            |                        |                       |                      |        |                |
| IPI:IPI00877852.1 VEGA:OTTHUMP0000<br>19682592 - 2R.GHMLENHVER.L                                                          | 1221.58            | 2      | 1e-005<br>1e-005           | 10.2<br>3.514          | 0.0<br>0.577          | 0<br>794.8           | 1      | 19/27          |
| 1 of 1 peptide matches reported, 0 removed due to filtering                                                               |                    |        |                            |                        |                       |                      |        |                |
| IPI:IPI00022434.4 TREMBL:A6NBZ8;B2RBS8;B4DPP6;Q56G89 ENSEMBL:E<br>19287468 - 1K.CCTESLVNR.R<br>19287468 - 1K.LVNEVTEFAK.T | 1140.47<br>1149.62 | 2<br>2 | 2e-005<br>0.0001<br>2e-005 | 20.2<br>3.308<br>4.222 | 0.0<br>0.574<br>0.525 | 0<br>935.4<br>792.1  | 1<br>1 | 15/24<br>18/27 |
| 2 of 2 peptide matches reported, 0 removed due to filtering                                                               |                    |        |                            |                        |                       |                      |        |                |
| IPI:IPI00216773.4 TREMBL:Q8IUk7 EN<br>19287468 - 1K.CCTESLVNR.R                                                           | 1140.47            | 2      | 2e-005<br>0.0001           | 20.2<br>3.308          | 0.0<br>0.574          | 0<br>935.4           | 1      | 15/24          |

|                                                             |         |   |        |       |       |        |   |        |
|-------------------------------------------------------------|---------|---|--------|-------|-------|--------|---|--------|
| 19287468 - 1K.LVNEVTEFAK.T                                  | 1149.62 | 2 | 2e-005 | 4.222 | 0.525 | 792.1  | 1 | 18/27  |
| 2 of 2 peptide matches reported, 0 removed due to filtering |         |   |        |       |       |        |   |        |
| IPI:IPI00745872.2 SWISS-PROT:P0276                          |         |   | 2e-005 | 20.2  | 0.0   | 0      |   |        |
| 19287468 - 1K.CCTESLVNR.R                                   | 1140.47 | 2 | 0.0001 | 3.308 | 0.574 | 935.4  | 1 | 15/24  |
| 19287468 - 1K.LVNEVTEFAK.T                                  | 1149.62 | 2 | 2e-005 | 4.222 | 0.525 | 792.1  | 1 | 18/27  |
| 2 of 2 peptide matches reported, 0 removed due to filtering |         |   |        |       |       |        |   |        |
| gi 113576 sp P02768 ALBU_HUMAN SER                          |         |   | 2e-005 | 20.2  | 0.0   | 113576 |   |        |
| 19287468 - 1K.CCTESLVNR.R                                   | 1140.47 | 2 | 0.0001 | 3.308 | 0.574 | 935.4  | 1 | 15/24  |
| 19287468 - 1K.LVNEVTEFAK.T                                  | 1149.62 | 2 | 2e-005 | 4.222 | 0.525 | 792.1  | 1 | 18/27  |
| 2 of 2 peptide matches reported, 0 removed due to filtering |         |   |        |       |       |        |   |        |
| IPI:IPI00878282.1 VEGA:OTTHUMP0000                          |         |   | 2e-005 | 10.2  | 0.0   | 0      |   |        |
| 19287468 - 1K.LVNEVTEFAK.T                                  | 1149.62 | 2 | 2e-005 | 4.222 | 0.525 | 792.1  | 1 | 18/27  |
| 1 of 1 peptide matches reported, 0 removed due to filtering |         |   |        |       |       |        |   |        |
| IPI:IPI00418163.3 TREMBL:B4E344;Q6                          |         |   | 2e-005 | 20.2  | 0.0   | 0      |   |        |
| 19287468 - 1K.ASAGLLGAHAAAITAYALTLTK.A                      | 2085.17 | 3 | 2e-005 | 3.435 | 0.549 | 736.3  | 1 | 26/126 |
| 2118291816 -K.ITQVLHFTK.D                                   | 1086.63 | 2 | 0.0002 | 3.684 | 0.435 | 1215.2 | 1 | 18/24  |
| 2 of 2 peptide matches reported, 0 removed due to filtering |         |   |        |       |       |        |   |        |
| IPI:IPI00643525.1 TREMBL:A7E2V2;B4                          |         |   | 2e-005 | 20.2  | 0.0   | 0      |   |        |
| 19287468 - 1K.ASAGLLGAHAAAITAYALTLTK.A                      | 2085.17 | 3 | 2e-005 | 3.435 | 0.549 | 736.3  | 1 | 26/126 |
| 2118291816 -K.ITQVLHFTK.D                                   | 1086.63 | 2 | 0.0002 | 3.684 | 0.435 | 1215.2 | 1 | 18/24  |
| 2 of 2 peptide matches reported, 0 removed due to filtering |         |   |        |       |       |        |   |        |
| IPI:IPI00843913.3 TREMBL:B0V2C8;B2                          |         |   | 2e-005 | 20.2  | 0.0   | 0      |   |        |
| 19287468 - 1K.ASAGLLGAHAAAITAYALTLTK.A                      | 2085.17 | 3 | 2e-005 | 3.435 | 0.549 | 736.3  | 1 | 26/126 |
| 2118291816 -K.ITQVLHFTK.D                                   | 1086.63 | 2 | 0.0002 | 3.684 | 0.435 | 1215.2 | 1 | 18/24  |
| 2 of 2 peptide matches reported, 0 removed due to filtering |         |   |        |       |       |        |   |        |
| IPI:IPI00887154.2 TREMBL:B0UZ85;Q6                          |         |   | 2e-005 | 20.2  | 0.0   | 0      |   |        |
| 19287468 - 1K.ASAGLLGAHAAAITAYALTLTK.A                      | 2085.17 | 3 | 2e-005 | 3.435 | 0.549 | 736.3  | 1 | 26/126 |
| 2118291816 -K.ITQVLHFTK.D                                   | 1086.63 | 2 | 0.0002 | 3.684 | 0.435 | 1215.2 | 1 | 18/24  |
| 2 of 2 peptide matches reported, 0 removed due to filtering |         |   |        |       |       |        |   |        |
| IPI:IPI00889723.1 TREMBL:B0QZR6;B4                          |         |   | 2e-005 | 20.2  | 0.0   | 0      |   |        |
| 19287468 - 1K.ASAGLLGAHAAAITAYALTLTK.A                      | 2085.17 | 3 | 2e-005 | 3.435 | 0.549 | 736.3  | 1 | 26/126 |
| 2118291816 -K.ITQVLHFTK.D                                   | 1086.63 | 2 | 0.0002 | 3.684 | 0.435 | 1215.2 | 1 | 18/24  |
| 2 of 2 peptide matches reported, 0 removed due to filtering |         |   |        |       |       |        |   |        |
| IPI:IPI00892547.1 TREMBL:B0UZ83 RE                          |         |   | 2e-005 | 20.2  | 0.0   | 0      |   |        |
| 19287468 - 1K.ASAGLLGAHAAAITAYALTLTK.A                      | 2085.17 | 3 | 2e-005 | 3.435 | 0.549 | 736.3  | 1 | 26/126 |
| 2118291816 -K.ITQVLHFTK.D                                   | 1086.63 | 2 | 0.0002 | 3.684 | 0.435 | 1215.2 | 1 | 18/24  |
| 2 of 2 peptide matches reported, 0 removed due to filtering |         |   |        |       |       |        |   |        |
| IPI:IPI00892604.1 TREMBL:A2BHY4;Q6                          |         |   | 2e-005 | 20.2  | 0.0   | 0      |   |        |
| 19287468 - 1K.ASAGLLGAHAAAITAYALTLTK.A                      | 2085.17 | 3 | 2e-005 | 3.435 | 0.549 | 736.3  | 1 | 26/126 |
| 2118291816 -K.ITQVLHFTK.D                                   | 1086.63 | 2 | 0.0002 | 3.684 | 0.435 | 1215.2 | 1 | 18/24  |
| 2 of 2 peptide matches reported, 0 removed due to filtering |         |   |        |       |       |        |   |        |
| IPI:IPI00937598.1 TREMBL:A6H8M8 RE                          |         |   | 2e-005 | 20.2  | 0.0   | 0      |   |        |
| 19287468 - 1K.ASAGLLGAHAAAITAYALTLTK.A                      | 2085.17 | 3 | 2e-005 | 3.435 | 0.549 | 736.3  | 1 | 26/126 |
| 2118291816 -K.ITQVLHFTK.D                                   | 1086.63 | 2 | 0.0002 | 3.684 | 0.435 | 1215.2 | 1 | 18/24  |
| 2 of 2 peptide matches reported, 0 removed due to filtering |         |   |        |       |       |        |   |        |
| IPI:IPI00922744.1 TREMBL:Q9UNU2 Ta                          |         |   | 2e-005 | 10.2  | 0.0   | 0      |   |        |
| 19287468 - 1K.ASAGLLGAHAAAITAYALTLTK.A                      | 2085.17 | 3 | 2e-005 | 3.435 | 0.549 | 736.3  | 1 | 26/126 |

1 of 1 peptide matches reported, 0 removed due to filtering

IPI:IPI00793108.1|VEGA:OTTHUMP0000  
2118291816 -K.VNKDDEEFIESNK.M 1566.73 3 3e-005 10.2 0.0 0 25/72

1 of 1 peptide matches reported, 0 removed due to filtering

IPI:IPI00794184.1|TREMBL:B3KTA8|VE  
2118291816 -K.VNKDDEEFIESNK.M 1566.73 3 3e-005 10.2 0.0 0 25/72

1 of 1 peptide matches reported, 0 removed due to filtering

IPI:IPI00021857.1|SWISS-PROT:P02656|TREMBL:A3KPE2|ENSEMBL:ENSP  
19287468 - 1R.GWVTDGFSSLK.D 1196.59 2 4e-005 10.2 0.0 0 17/30

1 of 1 peptide matches reported, 0 removed due to filtering

IPI:IPI00657670.1|TREMBL:B0YIW2|EN  
19287468 - 1R.GWVTDGFSSLK.D 1196.59 2 4e-005 10.2 0.0 0 17/30

1 of 1 peptide matches reported, 0 removed due to filtering

IPI:IPI00550731.2|SWISS-PROT:P06310|TREMBL:Q8TCD0|ENSEMBL:ENSP  
19287468 - 1K.SGTASVVCLLNNFYPR.E 1798.88 2 5e-005 10.2 0.0 0 17/45

1 of 1 peptide matches reported, 0 removed due to filtering

IPI:IPI00556287.1|TREMBL:Q569I7 Ta  
19287468 - 1K.SGTASVVCLLNNFYPR.E 1798.88 2 5e-005 10.2 0.0 0 17/45

1 of 1 peptide matches reported, 0 removed due to filtering

IPI:IPI00784773.7|TREMBL:Q7Z3Y4|EN  
19287468 - 1K.SGTASVVCLLNNFYPR.E 1798.88 2 5e-005 10.2 0.0 0 17/45

1 of 1 peptide matches reported, 0 removed due to filtering

IPI:IPI00784865.1|TREMBL:Q6P5S8 Ta  
19287468 - 1K.SGTASVVCLLNNFYPR.E 1798.88 2 5e-005 10.2 0.0 0 17/45

1 of 1 peptide matches reported, 0 removed due to filtering

IPI:IPI00853045.1|TREMBL:Q5EFE6 Ta  
19287468 - 1K.SGTASVVCLLNNFYPR.E 1798.88 2 5e-005 10.2 0.0 0 17/45

1 of 1 peptide matches reported, 0 removed due to filtering

IPI:IPI00909649.2|SWISS-PROT:P0183  
19287468 - 1K.SGTASVVCLLNNFYPR.E 1798.88 2 5e-005 10.2 0.0 0 17/45

1 of 1 peptide matches reported, 0 removed due to filtering

IPI:IPI00658130.1|TREMBL:Q5NV84;Q6  
K.RPSGVPDR.F 883.47 2 5e-005 20.2 0.0 0  
19287468 - 1K.YAASSYLSLTPEQWK.S 1743.86 2 0.1 2.914 0.384 612.6 1 14/21  
5e-005 3.671 0.433 421.7 1 16/42

2 of 2 peptide matches reported, 0 removed due to filtering

IPI:IPI00807428.1|TREMBL:A0A5E4 Ta  
19287468 - 1R.FSGSILGNK.A 922.50 2 5e-005 20.2 0.0 0  
19287468 - 1K.YAASSYLSLTPEQWK.S 1743.86 2 0.004 2.914 0.340 661.6 1 16/24  
5e-005 3.671 0.433 421.7 1 16/42

2 of 2 peptide matches reported, 0 removed due to filtering

IPI:IPI00154742.6|SWISS-PROT:P01842|TREMBL:Q6PJR7;Q8N355;Q8TCJ  
19287468 - 1K.YAASSYLSLTPEQWK.S 1743.86 2 5e-005 10.2 0.0 0  
5e-005 3.671 0.433 421.7 1 16/42

1 of 1 peptide matches reported, 0 removed due to filtering



---

|                                                                                             |         |   |                  |               |              |             |   |       |
|---------------------------------------------------------------------------------------------|---------|---|------------------|---------------|--------------|-------------|---|-------|
| IPI:IPI00450309.1 TREMBL:Q6IN99 Ta<br>19287468 - 1K.YAASSYLSLTPEQWK.S                       | 1743.86 | 2 | 5e-005<br>5e-005 | 10.2<br>3.671 | 0.0<br>0.433 | 0<br>421.7  | 1 | 16/42 |
| 1 of 1 peptide matches reported, 0 removed due to filtering                                 |         |   |                  |               |              |             |   |       |
| IPI:IPI00642632.1 TREMBL:A0M8Q6 EN<br>19287468 - 1K.YAASSYLSLTPEQWK.S                       | 1743.86 | 2 | 5e-005<br>5e-005 | 10.2<br>3.671 | 0.0<br>0.433 | 0<br>421.7  | 1 | 16/42 |
| 1 of 1 peptide matches reported, 0 removed due to filtering                                 |         |   |                  |               |              |             |   |       |
| IPI:IPI00719373.2 TREMBL:Q6NS95 EN<br>19287468 - 1K.YAASSYLSLTPEQWK.S                       | 1743.86 | 2 | 5e-005<br>5e-005 | 10.2<br>3.671 | 0.0<br>0.433 | 0<br>421.7  | 1 | 16/42 |
| 1 of 1 peptide matches reported, 0 removed due to filtering                                 |         |   |                  |               |              |             |   |       |
| IPI:IPI00719452.1 TREMBL:Q5NV69;Q6<br>19287468 - 1K.YAASSYLSLTPEQWK.S                       | 1743.86 | 2 | 5e-005<br>5e-005 | 10.2<br>3.671 | 0.0<br>0.433 | 0<br>421.7  | 1 | 16/42 |
| 1 of 1 peptide matches reported, 0 removed due to filtering                                 |         |   |                  |               |              |             |   |       |
| IPI:IPI00744476.6 TREMBL:A2MYD6;Q6<br>19287468 - 1K.YAASSYLSLTPEQWK.S                       | 1743.86 | 2 | 5e-005<br>5e-005 | 10.2<br>3.671 | 0.0<br>0.433 | 0<br>421.7  | 1 | 16/42 |
| 1 of 1 peptide matches reported, 0 removed due to filtering                                 |         |   |                  |               |              |             |   |       |
| IPI:IPI00784935.1 TREMBL:Q6GMW3 Ta<br>19287468 - 1K.YAASSYLSLTPEQWK.S                       | 1743.86 | 2 | 5e-005<br>5e-005 | 10.2<br>3.671 | 0.0<br>0.433 | 0<br>421.7  | 1 | 16/42 |
| 1 of 1 peptide matches reported, 0 removed due to filtering                                 |         |   |                  |               |              |             |   |       |
| IPI:IPI00788824.3 TREMBL:Q567P1;Q5<br>19287468 - 1K.YAASSYLSLTPEQWK.S                       | 1743.86 | 2 | 5e-005<br>5e-005 | 10.2<br>3.671 | 0.0<br>0.433 | 0<br>421.7  | 1 | 16/42 |
| 1 of 1 peptide matches reported, 0 removed due to filtering                                 |         |   |                  |               |              |             |   |       |
| IPI:IPI00827875.1 TREMBL:A2MYD2;A2<br>19287468 - 1K.YAASSYLSLTPEQWK.S                       | 1743.86 | 2 | 5e-005<br>5e-005 | 10.2<br>3.671 | 0.0<br>0.433 | 0<br>421.7  | 1 | 16/42 |
| 1 of 1 peptide matches reported, 0 removed due to filtering                                 |         |   |                  |               |              |             |   |       |
| IPI:IPI00829640.1 TREMBL:Q6GMW4 Ta<br>19287468 - 1K.YAASSYLSLTPEQWK.S                       | 1743.86 | 2 | 5e-005<br>5e-005 | 10.2<br>3.671 | 0.0<br>0.433 | 0<br>421.7  | 1 | 16/42 |
| 1 of 1 peptide matches reported, 0 removed due to filtering                                 |         |   |                  |               |              |             |   |       |
| IPI:IPI00830047.1 TREMBL:A6NKU1 EN<br>19287468 - 1K.YAASSYLSLTPEQWK.S                       | 1743.86 | 2 | 5e-005<br>5e-005 | 10.2<br>3.671 | 0.0<br>0.433 | 0<br>421.7  | 1 | 16/42 |
| 1 of 1 peptide matches reported, 0 removed due to filtering                                 |         |   |                  |               |              |             |   |       |
| IPI:IPI00852577.2 TREMBL:A0M8Q9 EN<br>19287468 - 1K.YAASSYLSLTPEQWK.S                       | 1743.86 | 2 | 5e-005<br>5e-005 | 10.2<br>3.671 | 0.0<br>0.433 | 0<br>421.7  | 1 | 16/42 |
| 1 of 1 peptide matches reported, 0 removed due to filtering                                 |         |   |                  |               |              |             |   |       |
| IPI:IPI00887169.2 TREMBL:A2MYD0;A2<br>19287468 - 1K.YAASSYLSLTPEQWK.S                       | 1743.86 | 2 | 5e-005<br>5e-005 | 10.2<br>3.671 | 0.0<br>0.433 | 0<br>421.7  | 1 | 16/42 |
| 1 of 1 peptide matches reported, 0 removed due to filtering                                 |         |   |                  |               |              |             |   |       |
| IPI:IPI00893178.1 ENSEMBL:ENSP0000<br>19287468 - 1K.YAASSYLSLTPEQWK.S                       | 1743.86 | 2 | 5e-005<br>5e-005 | 10.2<br>3.671 | 0.0<br>0.433 | 0<br>421.7  | 1 | 16/42 |
| 1 of 1 peptide matches reported, 0 removed due to filtering                                 |         |   |                  |               |              |             |   |       |
| IPI:IPI00026197.7 SWISS-PROT:P06312 ENSEMBL:ENSP00000374778 H-<br>2118291816 -K.LLIYWASTR.E | 1122.63 | 2 | 5e-005<br>5e-005 | 10.2<br>3.929 | 0.0<br>0.542 | 0<br>1464.4 | 1 | 19/24 |
| 1 of 1 peptide matches reported, 0 removed due to filtering                                 |         |   |                  |               |              |             |   |       |

---

|                                                                                                     |                    |        |                          |                        |                       |                      |        |                |
|-----------------------------------------------------------------------------------------------------|--------------------|--------|--------------------------|------------------------|-----------------------|----------------------|--------|----------------|
| IPI:IPI00385143.1 TREMBL:Q9NP29 Ta<br>2118291816 -K.LLIYWASTR.E                                     | 1122.63            | 2      | 5e-005<br>5e-005         | 10.2<br>3.929          | 0.0<br>0.542          | 0<br>1464.4          | 1      | 19/24          |
| 1 of 1 peptide matches reported, 0 removed due to filtering                                         |                    |        |                          |                        |                       |                      |        |                |
| IPI:IPI00386132.1 SWISS-PROT:P0631<br>2118291816 -K.LLIYWASTR.E                                     | 1122.63            | 2      | 5e-005<br>5e-005         | 10.2<br>3.929          | 0.0<br>0.542          | 0<br>1464.4          | 1      | 19/24          |
| 1 of 1 peptide matches reported, 0 removed due to filtering                                         |                    |        |                          |                        |                       |                      |        |                |
| IPI:IPI00386133.1 SWISS-PROT:P0631<br>2118291816 -K.LLIYWASTR.E                                     | 1122.63            | 2      | 5e-005<br>5e-005         | 10.2<br>3.929          | 0.0<br>0.542          | 0<br>1464.4          | 1      | 19/24          |
| 1 of 1 peptide matches reported, 0 removed due to filtering                                         |                    |        |                          |                        |                       |                      |        |                |
| IPI:IPI00387120.1 SWISS-PROT:P0162<br>2118291816 -K.LLIYWASTR.E                                     | 1122.63            | 2      | 5e-005<br>5e-005         | 10.2<br>3.929          | 0.0<br>0.542          | 0<br>1464.4          | 1      | 19/24          |
| 1 of 1 peptide matches reported, 0 removed due to filtering                                         |                    |        |                          |                        |                       |                      |        |                |
| IPI:IPI00029739.5 SWISS-PROT:P0860<br>19287468 - 1R.RPYFPVAVGK.Y<br>19287468 - 1R.EIMENYNIALR.W     | 1133.65<br>1365.68 | 2<br>2 | 5e-005<br>0.02<br>5e-005 | 20.2<br>3.852<br>3.298 | 0.0<br>0.322<br>0.403 | 0<br>1065.5<br>992.9 | 1<br>1 | 18/27<br>18/30 |
| 2 of 2 peptide matches reported, 0 removed due to filtering                                         |                    |        |                          |                        |                       |                      |        |                |
| IPI:IPI00011264.2 SWISS-PROT:Q03591 ENSEMBL:ENSP00000314299 RE<br>19287468 - 1R.EIMENYNIALR.W       | 1365.68            | 2      | 5e-005<br>5e-005         | 10.2<br>3.298          | 0.0<br>0.403          | 0<br>992.9           | 1      | 18/30          |
| 1 of 1 peptide matches reported, 0 removed due to filtering                                         |                    |        |                          |                        |                       |                      |        |                |
| IPI:IPI00513925.1 ENSEMBL:ENSP0000<br>19287468 - 1R.EIMENYNIALR.W                                   | 1365.68            | 2      | 5e-005<br>5e-005         | 10.2<br>3.298          | 0.0<br>0.403          | 0<br>992.9           | 1      | 18/30          |
| 1 of 1 peptide matches reported, 0 removed due to filtering                                         |                    |        |                          |                        |                       |                      |        |                |
| IPI:IPI00883722.1 TREMBL:B1AKG0;Q6<br>19287468 - 1R.EIMENYNIALR.W                                   | 1365.68            | 2      | 5e-005<br>5e-005         | 10.2<br>3.298          | 0.0<br>0.403          | 0<br>992.9           | 1      | 18/30          |
| 1 of 1 peptide matches reported, 0 removed due to filtering                                         |                    |        |                          |                        |                       |                      |        |                |
| IPI:IPI00654755.3 SWISS-PROT:P6887<br>19287468 - 1K.LHVDPENFR.L<br>19287468 - 1R.LLGNVLVCVLAHHFGK.E | 1126.56<br>1777.98 | 2<br>3 | 6e-005<br>0.06<br>6e-005 | 20.1<br>2.171<br>2.552 | 0.0<br>0.417<br>0.484 | 0<br>654.7<br>158.2  | 1<br>1 | 14/24<br>22/90 |
| 2 of 2 peptide matches reported, 0 removed due to filtering                                         |                    |        |                          |                        |                       |                      |        |                |
| IPI:IPI00884107.1 TREMBL:Q14473 Ta<br>19287468 - 1K.LHVDPENFR.L<br>19287468 - 1R.LLGNVLVCVLAHHFGK.E | 1126.56<br>1777.98 | 2<br>3 | 6e-005<br>0.06<br>6e-005 | 20.1<br>2.171<br>2.552 | 0.0<br>0.417<br>0.484 | 0<br>654.7<br>158.2  | 1<br>1 | 14/24<br>22/90 |
| 2 of 2 peptide matches reported, 0 removed due to filtering                                         |                    |        |                          |                        |                       |                      |        |                |
| IPI:IPI00816644.1 TREMBL:Q5GMQ1;Q9<br>19287468 - 1R.LLGNVLVCVLAHHFGK.E                              | 1777.98            | 3      | 6e-005<br>6e-005         | 10.1<br>2.552          | 0.0<br>0.484          | 0<br>158.2           | 1      | 22/90          |
| 1 of 1 peptide matches reported, 0 removed due to filtering                                         |                    |        |                          |                        |                       |                      |        |                |
| IPI:IPI00384697.2 SWISS-PROT:P0276<br>19287468 - 1K.CCTESLVNR.R                                     | 1140.47            | 2      | 0.0001<br>0.0001         | 10.2<br>3.308          | 0.0<br>0.574          | 0<br>935.4           | 1      | 15/24          |
| 1 of 1 peptide matches reported, 0 removed due to filtering                                         |                    |        |                          |                        |                       |                      |        |                |
| IPI:IPI00878517.1 TREMBL:B7WNR0 EN<br>19287468 - 1K.CCTESLVNR.R                                     | 1140.47            | 2      | 0.0001<br>0.0001         | 10.2<br>3.308          | 0.0<br>0.574          | 0<br>935.4           | 1      | 15/24          |
| 1 of 1 peptide matches reported, 0 removed due to filtering                                         |                    |        |                          |                        |                       |                      |        |                |
| IPI:IPI00908876.1 TREMBL:B4DPR2 Ta<br>19287468 - 1K.CCTESLVNR.R                                     | 1140.47            | 2      | 0.0001<br>0.0001         | 10.2<br>3.308          | 0.0<br>0.574          | 0<br>935.4           | 1      | 15/24          |

1 of 1 peptide matches reported, 0 removed due to filtering

|                                    |         |   |        |       |       |        |   |       |
|------------------------------------|---------|---|--------|-------|-------|--------|---|-------|
| gi 229552 prf  754920A albumin [Bo |         |   | 0.0001 | 10.2  | 0.0   | 229552 |   |       |
| 19287468 - 1K.CCTESLVNR.R          | 1140.47 | 2 | 0.0001 | 3.308 | 0.574 | 935.4  | 1 | 15/24 |

1 of 1 peptide matches reported, 0 removed due to filtering

|                                    |         |   |        |       |       |        |   |       |
|------------------------------------|---------|---|--------|-------|-------|--------|---|-------|
| gi 113574 sp P02769 ALBU_BOVIN SER |         |   | 0.0001 | 10.2  | 0.0   | 113574 |   |       |
| 19287468 - 1K.CCTESLVNR.R          | 1140.47 | 2 | 0.0001 | 3.308 | 0.574 | 935.4  | 1 | 15/24 |

1 of 1 peptide matches reported, 0 removed due to filtering

|                                    |         |   |        |       |       |        |   |       |
|------------------------------------|---------|---|--------|-------|-------|--------|---|-------|
| IPI:IPI00386879.1 TREMBL:Q96K68 Ta |         |   | 0.0001 | 18.2  | 0.0   | 0      |   |       |
| 19287468 - 1R.WLQGSQELPR.E         | 1213.63 | 2 | 0.0001 | 3.386 | 0.262 | 1272.1 | 1 | 18/27 |
| 19287468 - 1K.NSLYLQM*NSLR.A       | 1354.68 | 2 | 0.002  | 2.168 | 0.118 | 607.2  | 1 | 14/30 |

2 of 2 peptide matches reported, 0 removed due to filtering

|                                    |         |   |        |       |       |        |   |       |
|------------------------------------|---------|---|--------|-------|-------|--------|---|-------|
| IPI:IPI00784950.1 TREMBL:Q6MZV6 Ta |         |   | 0.0001 | 18.2  | 0.0   | 0      |   |       |
| 19287468 - 1R.WLQGSQELPR.E         | 1213.63 | 2 | 0.0001 | 3.386 | 0.262 | 1272.1 | 1 | 18/27 |
| 19287468 - 1K.NSLYLQM*NSLR.A       | 1354.68 | 2 | 0.002  | 2.168 | 0.118 | 607.2  | 1 | 14/30 |

2 of 2 peptide matches reported, 0 removed due to filtering

|                                                               |         |   |        |       |       |        |   |       |
|---------------------------------------------------------------|---------|---|--------|-------|-------|--------|---|-------|
| IPI:IPI00383164.1 TREMBL:Q8WY24 Tax_Id=9606 Gene_Symbol=IGHA1 |         |   | 0.0001 | 10.2  | 0.0   | 0      |   |       |
| 19287468 - 1R.WLQGSQELPR.E                                    | 1213.63 | 2 | 0.0001 | 3.386 | 0.262 | 1272.1 | 1 | 18/27 |

1 of 1 peptide matches reported, 0 removed due to filtering

|                                    |         |   |        |       |       |        |   |       |
|------------------------------------|---------|---|--------|-------|-------|--------|---|-------|
| IPI:IPI00384952.1 TREMBL:Q7Z379 Ta |         |   | 0.0001 | 10.2  | 0.0   | 0      |   |       |
| 19287468 - 1R.WLQGSQELPR.E         | 1213.63 | 2 | 0.0001 | 3.386 | 0.262 | 1272.1 | 1 | 18/27 |

1 of 1 peptide matches reported, 0 removed due to filtering

|                                    |         |   |        |       |       |        |   |       |
|------------------------------------|---------|---|--------|-------|-------|--------|---|-------|
| IPI:IPI00386524.3 TREMBL:Q96DK0 Ta |         |   | 0.0001 | 10.2  | 0.0   | 0      |   |       |
| 19287468 - 1R.WLQGSQELPR.E         | 1213.63 | 2 | 0.0001 | 3.386 | 0.262 | 1272.1 | 1 | 18/27 |

1 of 1 peptide matches reported, 0 removed due to filtering

|                                    |         |   |        |       |       |        |   |       |
|------------------------------------|---------|---|--------|-------|-------|--------|---|-------|
| IPI:IPI00423460.3 TREMBL:Q6N090 Ta |         |   | 0.0001 | 10.2  | 0.0   | 0      |   |       |
| 19287468 - 1R.WLQGSQELPR.E         | 1213.63 | 2 | 0.0001 | 3.386 | 0.262 | 1272.1 | 1 | 18/27 |

1 of 1 peptide matches reported, 0 removed due to filtering

|                                    |         |   |        |       |       |        |   |       |
|------------------------------------|---------|---|--------|-------|-------|--------|---|-------|
| IPI:IPI00423461.3 TREMBL:Q6N091 Ta |         |   | 0.0001 | 10.2  | 0.0   | 0      |   |       |
| 19287468 - 1R.WLQGSQELPR.E         | 1213.63 | 2 | 0.0001 | 3.386 | 0.262 | 1272.1 | 1 | 18/27 |

1 of 1 peptide matches reported, 0 removed due to filtering

|                                    |         |   |        |       |       |        |   |       |
|------------------------------------|---------|---|--------|-------|-------|--------|---|-------|
| IPI:IPI00423462.5 TREMBL:Q6N092 Ta |         |   | 0.0001 | 10.2  | 0.0   | 0      |   |       |
| 19287468 - 1R.WLQGSQELPR.E         | 1213.63 | 2 | 0.0001 | 3.386 | 0.262 | 1272.1 | 1 | 18/27 |

1 of 1 peptide matches reported, 0 removed due to filtering

|                                    |         |   |        |       |       |        |   |       |
|------------------------------------|---------|---|--------|-------|-------|--------|---|-------|
| IPI:IPI00426060.3 TREMBL:Q6MZW0 Ta |         |   | 0.0001 | 10.2  | 0.0   | 0      |   |       |
| 19287468 - 1R.WLQGSQELPR.E         | 1213.63 | 2 | 0.0001 | 3.386 | 0.262 | 1272.1 | 1 | 18/27 |

1 of 1 peptide matches reported, 0 removed due to filtering

|                                    |         |   |        |       |       |        |   |       |
|------------------------------------|---------|---|--------|-------|-------|--------|---|-------|
| IPI:IPI00449920.1 SWISS-PROT:P0187 |         |   | 0.0001 | 10.2  | 0.0   | 0      |   |       |
| 19287468 - 1R.WLQGSQELPR.E         | 1213.63 | 2 | 0.0001 | 3.386 | 0.262 | 1272.1 | 1 | 18/27 |

1 of 1 peptide matches reported, 0 removed due to filtering

|                                    |         |   |        |       |       |        |   |       |
|------------------------------------|---------|---|--------|-------|-------|--------|---|-------|
| IPI:IPI00641229.4 SWISS-PROT:P0187 |         |   | 0.0001 | 10.2  | 0.0   | 0      |   |       |
| 19287468 - 1R.WLQGSQELPR.E         | 1213.63 | 2 | 0.0001 | 3.386 | 0.262 | 1272.1 | 1 | 18/27 |

1 of 1 peptide matches reported, 0 removed due to filtering

|                                                                                               |         |   |        |      |     |   |       |
|-----------------------------------------------------------------------------------------------|---------|---|--------|------|-----|---|-------|
| IPI:IPI00642017.1 TREMBL:Q7Z374 VE<br>19287468 - 1R.WLQGSQELPR.E                              | 1213.63 | 2 | 0.0001 | 10.2 | 0.0 | 0 | 18/27 |
| 1 of 1 peptide matches reported, 0 removed due to filtering                                   |         |   |        |      |     |   |       |
| IPI:IPI00644497.4 H-INV:HIT0002157<br>19287468 - 1R.WLQGSQELPR.E                              | 1213.63 | 2 | 0.0001 | 10.2 | 0.0 | 0 | 18/27 |
| 1 of 1 peptide matches reported, 0 removed due to filtering                                   |         |   |        |      |     |   |       |
| IPI:IPI00647704.1 TREMBL:Q6ZW64 Ta<br>19287468 - 1R.WLQGSQELPR.E                              | 1213.63 | 2 | 0.0001 | 10.2 | 0.0 | 0 | 18/27 |
| 1 of 1 peptide matches reported, 0 removed due to filtering                                   |         |   |        |      |     |   |       |
| IPI:IPI00784758.1 TREMBL:Q6MZX9 Ta<br>19287468 - 1R.WLQGSQELPR.E                              | 1213.63 | 2 | 0.0001 | 10.2 | 0.0 | 0 | 18/27 |
| 1 of 1 peptide matches reported, 0 removed due to filtering                                   |         |   |        |      |     |   |       |
| IPI:IPI00784830.1 TREMBL:Q6ZVX0 Ta<br>19287468 - 1R.WLQGSQELPR.E                              | 1213.63 | 2 | 0.0001 | 10.2 | 0.0 | 0 | 18/27 |
| 1 of 1 peptide matches reported, 0 removed due to filtering                                   |         |   |        |      |     |   |       |
| IPI:IPI00785067.1 TREMBL:Q6P089 Ta<br>19287468 - 1R.WLQGSQELPR.E                              | 1213.63 | 2 | 0.0001 | 10.2 | 0.0 | 0 | 18/27 |
| 1 of 1 peptide matches reported, 0 removed due to filtering                                   |         |   |        |      |     |   |       |
| IPI:IPI00829711.1 TREMBL:A6NE94 EN<br>19287468 - 1R.WLQGSQELPR.E                              | 1213.63 | 2 | 0.0001 | 10.2 | 0.0 | 0 | 18/27 |
| 1 of 1 peptide matches reported, 0 removed due to filtering                                   |         |   |        |      |     |   |       |
| IPI:IPI00893853.1 VEGA:OTTHUMP0000<br>19287468 - 1R.WLQGSQELPR.E                              | 1213.63 | 2 | 0.0001 | 10.2 | 0.0 | 0 | 18/27 |
| 1 of 1 peptide matches reported, 0 removed due to filtering                                   |         |   |        |      |     |   |       |
| IPI:IPI00894384.1 TREMBL:Q6N041;Q9<br>19287468 - 1R.WLQGSQELPR.E                              | 1213.63 | 2 | 0.0001 | 10.2 | 0.0 | 0 | 18/27 |
| 1 of 1 peptide matches reported, 0 removed due to filtering                                   |         |   |        |      |     |   |       |
| IPI:IPI00032258.4 SWISS-PROT:P0C0L4 Tax_Id=9606 Gene_Symbol=C4<br>2118291816 -K.ITQVLHFTK.D   | 1086.63 | 2 | 0.0002 | 10.2 | 0.0 | 0 | 18/24 |
| 1 of 1 peptide matches reported, 0 removed due to filtering                                   |         |   |        |      |     |   |       |
| IPI:IPI00654875.1 SWISS-PROT:P0C0L<br>2118291816 -K.ITQVLHFTK.D                               | 1086.63 | 2 | 0.0002 | 10.2 | 0.0 | 0 | 18/24 |
| 1 of 1 peptide matches reported, 0 removed due to filtering                                   |         |   |        |      |     |   |       |
| IPI:IPI00935601.1 TREMBL:Q9UM89 EN<br>2118291816 -K.ITQVLHFTK.D                               | 1086.63 | 2 | 0.0002 | 10.2 | 0.0 | 0 | 18/24 |
| 1 of 1 peptide matches reported, 0 removed due to filtering                                   |         |   |        |      |     |   |       |
| IPI:IPI00032328.2 SWISS-PROT:P01042-1 TREMBL:B4E1C2 ENSEMBL:EN<br>2118291816 -K.TVGSDFYFSFK.Y | 1251.59 | 2 | 0.0003 | 10.2 | 0.0 | 0 | 18/30 |
| 1 of 1 peptide matches reported, 0 removed due to filtering                                   |         |   |        |      |     |   |       |
| IPI:IPI00215894.1 SWISS-PROT:P0104<br>2118291816 -K.TVGSDFYFSFK.Y                             | 1251.59 | 2 | 0.0003 | 10.2 | 0.0 | 0 | 18/30 |
| 1 of 1 peptide matches reported, 0 removed due to filtering                                   |         |   |        |      |     |   |       |

|                                                                                                    |                    |        |                           |                        |                       |                     |        |                |
|----------------------------------------------------------------------------------------------------|--------------------|--------|---------------------------|------------------------|-----------------------|---------------------|--------|----------------|
| IPI:IPI00797097.1 VEGA:OTTHUMP0000<br>2118291816 -K.TVGSDFYFSFK.Y                                  | 1251.59            | 2      | 0.0003<br>0.0003          | 10.2<br>3.649          | 0.0<br>0.643          | 0<br>417.3          | 1      | 18/30          |
| 1 of 1 peptide matches reported, 0 removed due to filtering                                        |                    |        |                           |                        |                       |                     |        |                |
| IPI:IPI00797833.4 VEGA:OTTHUMP0000<br>2118291816 -K.TVGSDFYFSFK.Y                                  | 1251.59            | 2      | 0.0003<br>0.0003          | 10.2<br>3.649          | 0.0<br>0.643          | 0<br>417.3          | 1      | 18/30          |
| 1 of 1 peptide matches reported, 0 removed due to filtering                                        |                    |        |                           |                        |                       |                     |        |                |
| IPI:IPI00924859.1 VEGA:OTTHUMP0000<br>2118291816 -K.TVGSDFYFSFK.Y                                  | 1251.59            | 2      | 0.0003<br>0.0003          | 10.2<br>3.649          | 0.0<br>0.643          | 0<br>417.3          | 1      | 18/30          |
| 1 of 1 peptide matches reported, 0 removed due to filtering                                        |                    |        |                           |                        |                       |                     |        |                |
| IPI:IPI00022420.3 SWISS-PROT:P02753 ENSEMBL:ENSP00000360519;EN<br>19287468 - 1K.YWGVASFLQK.G       | 1198.63            | 2      | 0.0003<br>0.0003          | 10.2<br>3.463          | 0.0<br>0.383          | 0<br>766.9          | 1      | 18/27          |
| 1 of 1 peptide matches reported, 0 removed due to filtering                                        |                    |        |                           |                        |                       |                     |        |                |
| IPI:IPI00480192.1 TREMBL:Q5VY30 EN<br>19287468 - 1K.YWGVASFLQK.G                                   | 1198.63            | 2      | 0.0003<br>0.0003          | 10.2<br>3.463          | 0.0<br>0.383          | 0<br>766.9          | 1      | 18/27          |
| 1 of 1 peptide matches reported, 0 removed due to filtering                                        |                    |        |                           |                        |                       |                     |        |                |
| IPI:IPI00844536.2 TREMBL:A6NCP9 EN<br>19287468 - 1K.YWGVASFLQK.G                                   | 1198.63            | 2      | 0.0003<br>0.0003          | 10.2<br>3.463          | 0.0<br>0.383          | 0<br>766.9          | 1      | 18/27          |
| 1 of 1 peptide matches reported, 0 removed due to filtering                                        |                    |        |                           |                        |                       |                     |        |                |
| IPI:IPI00426051.3 TREMBL:Q6MZU6 Ta<br>19287468 - 1K.NSLYLQM*NSLR.A<br>19287468 - 1K.GPSVFPLAPCSR.S | 1354.68<br>1288.64 | 2<br>2 | 0.0004<br>0.002<br>0.0004 | 18.2<br>2.168<br>3.377 | 0.0<br>0.118<br>0.600 | 0<br>607.2<br>416.0 | 1<br>1 | 14/30<br>16/33 |
| 2 of 2 peptide matches reported, 0 removed due to filtering                                        |                    |        |                           |                        |                       |                     |        |                |
| IPI:IPI00168728.1 TREMBL:Q8NF17 ENSEMBL:ENSP00000374992 Tax_Id<br>19287468 - 1K.GPSVFPLAPCSR.S     | 1288.64            | 2      | 0.0004<br>0.0004          | 10.2<br>3.377          | 0.0<br>0.600          | 0<br>416.0          | 1      | 16/33          |
| 1 of 1 peptide matches reported, 0 removed due to filtering                                        |                    |        |                           |                        |                       |                     |        |                |
| IPI:IPI00383957.1 TREMBL:O95978 Ta<br>19287468 - 1K.GPSVFPLAPCSR.S                                 | 1288.64            | 2      | 0.0004<br>0.0004          | 10.2<br>3.377          | 0.0<br>0.600          | 0<br>416.0          | 1      | 16/33          |
| 1 of 1 peptide matches reported, 0 removed due to filtering                                        |                    |        |                           |                        |                       |                     |        |                |
| IPI:IPI00399007.7 SWISS-PROT:P0185<br>19287468 - 1K.GPSVFPLAPCSR.S                                 | 1288.64            | 2      | 0.0004<br>0.0004          | 10.2<br>3.377          | 0.0<br>0.600          | 0<br>416.0          | 1      | 16/33          |
| 1 of 1 peptide matches reported, 0 removed due to filtering                                        |                    |        |                           |                        |                       |                     |        |                |
| IPI:IPI00418153.1 TREMBL:Q6N030 Ta<br>19287468 - 1K.GPSVFPLAPCSR.S                                 | 1288.64            | 2      | 0.0004<br>0.0004          | 10.2<br>3.377          | 0.0<br>0.600          | 0<br>416.0          | 1      | 16/33          |
| 1 of 1 peptide matches reported, 0 removed due to filtering                                        |                    |        |                           |                        |                       |                     |        |                |
| IPI:IPI00827754.3 SWISS-PROT:P0186<br>19287468 - 1K.GPSVFPLAPCSR.S                                 | 1288.64            | 2      | 0.0004<br>0.0004          | 10.2<br>3.377          | 0.0<br>0.600          | 0<br>416.0          | 1      | 16/33          |
| 1 of 1 peptide matches reported, 0 removed due to filtering                                        |                    |        |                           |                        |                       |                     |        |                |
| IPI:IPI00829716.2 TREMBL:A6NJI8 EN<br>19287468 - 1K.GPSVFPLAPCSR.S                                 | 1288.64            | 2      | 0.0004<br>0.0004          | 10.2<br>3.377          | 0.0<br>0.600          | 0<br>416.0          | 1      | 16/33          |
| 1 of 1 peptide matches reported, 0 removed due to filtering                                        |                    |        |                           |                        |                       |                     |        |                |
| IPI:IPI00829814.1 SWISS-PROT:P0186<br>19287468 - 1K.GPSVFPLAPCSR.S                                 | 1288.64            | 2      | 0.0004<br>0.0004          | 10.2<br>3.377          | 0.0<br>0.600          | 0<br>416.0          | 1      | 16/33          |
| 1 of 1 peptide matches reported, 0 removed due to filtering                                        |                    |        |                           |                        |                       |                     |        |                |

|                                                                |         |   |        |       |       |       |   |       |
|----------------------------------------------------------------|---------|---|--------|-------|-------|-------|---|-------|
| IPI:IPI00829940.1 TREMBL:A6NGU3 EN                             |         |   | 0.0004 | 10.2  | 0.0   | 0     |   |       |
| 19287468 - 1K.GPSVFPLAPCSR.S                                   | 1288.64 | 2 | 0.0004 | 3.377 | 0.600 | 416.0 | 1 | 16/33 |
| 1 of 1 peptide matches reported, 0 removed due to filtering    |         |   |        |       |       |       |   |       |
| IPI:IPI00830132.1 TREMBL:A6NNZ4 EN                             |         |   | 0.0004 | 10.2  | 0.0   | 0     |   |       |
| 19287468 - 1K.GPSVFPLAPCSR.S                                   | 1288.64 | 2 | 0.0004 | 3.377 | 0.600 | 416.0 | 1 | 16/33 |
| 1 of 1 peptide matches reported, 0 removed due to filtering    |         |   |        |       |       |       |   |       |
| IPI:IPI00930072.1 TREMBL:Q68CN4 Ta                             |         |   | 0.0004 | 10.2  | 0.0   | 0     |   |       |
| 19287468 - 1K.GPSVFPLAPCSR.S                                   | 1288.64 | 2 | 0.0004 | 3.377 | 0.600 | 416.0 | 1 | 16/33 |
| 1 of 1 peptide matches reported, 0 removed due to filtering    |         |   |        |       |       |       |   |       |
| IPI:IPI00930442.1 TREMBL:Q6MZX7 Ta                             |         |   | 0.0004 | 10.2  | 0.0   | 0     |   |       |
| 19287468 - 1K.GPSVFPLAPCSR.S                                   | 1288.64 | 2 | 0.0004 | 3.377 | 0.600 | 416.0 | 1 | 16/33 |
| 1 of 1 peptide matches reported, 0 removed due to filtering    |         |   |        |       |       |       |   |       |
| IPI:IPI00930684.1 TREMBL:Q5EBM2 Ta                             |         |   | 0.0004 | 10.2  | 0.0   | 0     |   |       |
| 19287468 - 1K.GPSVFPLAPCSR.S                                   | 1288.64 | 2 | 0.0004 | 3.377 | 0.600 | 416.0 | 1 | 16/33 |
| 1 of 1 peptide matches reported, 0 removed due to filtering    |         |   |        |       |       |       |   |       |
| IPI:IPI00936490.1 REFSEQ:XP_002348                             |         |   | 0.0004 | 10.2  | 0.0   | 0     |   |       |
| 19287468 - 1K.GPSVFPLAPCSR.S                                   | 1288.64 | 2 | 0.0004 | 3.377 | 0.600 | 416.0 | 1 | 16/33 |
| 1 of 1 peptide matches reported, 0 removed due to filtering    |         |   |        |       |       |       |   |       |
| IPI:IPI00218732.3 SWISS-PROT:P27169 TREMBL:B4DX19;Q96P89;Q96P9 |         |   | 0.0005 | 24.2  | 0.0   | 0     |   |       |
| 19287468 - 1R.IQNILTEEPK.V                                     | 1184.65 | 2 | 0.001  | 3.049 | 0.518 | 731.0 | 1 | 15/27 |
| 19287468 - 1K.LLIGTVFHK.A                                      | 1027.63 | 2 | 0.0005 | 2.467 | 0.391 | 636.3 | 1 | 16/24 |
| 19287468 - 1K.LLIGTVFHKALYCEL.-                                | 1777.96 | 3 | 0.02   | 1.300 | 0.501 | 63.0  | 3 | 14/84 |
| 3 of 3 peptide matches reported, 0 removed due to filtering    |         |   |        |       |       |       |   |       |
| IPI:IPI00299778.2 SWISS-PROT:Q15166 TREMBL:A4D1H8 ENSEMBL:ENSP |         |   | 0.0005 | 10.1  | 0.0   | 0     |   |       |
| 19287468 - 1K.LLIGTVFHK.T                                      | 1027.63 | 2 | 0.0005 | 2.467 | 0.000 | 636.3 | 1 | 16/24 |
| 1 of 1 peptide matches reported, 0 removed due to filtering    |         |   |        |       |       |       |   |       |
| IPI:IPI00925751.1 VEGA:OTTHUMP0000                             |         |   | 0.0005 | 10.1  | 0.0   | 0     |   |       |
| 19287468 - 1K.LLIGTVFHK.T                                      | 1027.63 | 2 | 0.0005 | 2.467 | 0.000 | 636.3 | 1 | 16/24 |
| 1 of 1 peptide matches reported, 0 removed due to filtering    |         |   |        |       |       |       |   |       |
| IPI:IPI00645363.2 TREMBL:Q6N089 Ta                             |         |   | 0.1    | 18.1  | 0.0   | 0     |   |       |
| 19287468 - 1K.NSLYLQM*NSLR.A                                   | 1354.68 | 2 | 0.002  | 2.168 | 0.118 | 607.2 | 1 | 14/30 |
| 2118291816 -K.GPSVFPLAPSSK.S                                   | 1186.65 | 2 | 0.02   | 2.948 | 0.348 | 465.0 | 1 | 15/33 |
| 2 of 2 peptide matches reported, 0 removed due to filtering    |         |   |        |       |       |       |   |       |
| IPI:IPI00930124.1 TREMBL:Q6MZV7 Ta                             |         |   | 0.1    | 18.1  | 0.0   | 0     |   |       |
| 19287468 - 1K.NSLYLQM*NSLR.A                                   | 1354.68 | 2 | 0.002  | 2.168 | 0.118 | 607.2 | 1 | 14/30 |
| 2118291816 -K.GPSVFPLAPSSK.S                                   | 1186.65 | 2 | 0.02   | 2.948 | 0.348 | 465.0 | 1 | 15/33 |
| 2 of 2 peptide matches reported, 0 removed due to filtering    |         |   |        |       |       |       |   |       |
| IPI:IPI00007899.4 TREMBL:Q9HCC1 Tax_Id=9606 Gene_Symbol=- Sing |         |   | 0.1    | 8.1   | 0.0   | 0     |   |       |
| 19287468 - 1K.NSLYLQM*NSLR.A                                   | 1354.68 | 2 | 0.002  | 2.168 | 0.118 | 607.2 | 1 | 14/30 |
| 1 of 1 peptide matches reported, 0 removed due to filtering    |         |   |        |       |       |       |   |       |
| IPI:IPI00382500.1 SWISS-PROT:P0178                             |         |   | 0.1    | 8.1   | 0.0   | 0     |   |       |
| 19287468 - 1K.NSLYLQM*NSLR.A                                   | 1354.68 | 2 | 0.002  | 2.168 | 0.118 | 607.2 | 1 | 14/30 |
| 1 of 1 peptide matches reported, 0 removed due to filtering    |         |   |        |       |       |       |   |       |
| IPI:IPI00384391.1 TREMBL:Q9UL71 Ta                             |         |   | 0.1    | 8.1   | 0.0   | 0     |   |       |
| 19287468 - 1K.NSLYLQM*NSLR.A                                   | 1354.68 | 2 | 0.002  | 2.168 | 0.118 | 607.2 | 1 | 14/30 |

1 of 1 peptide matches reported, 0 removed due to filtering

IPI:IPI00555872.5|TREMBL:Q9UL91 Ta  
19287468 - 1K.NSLYLQM\*NSLR.A 1354.68 2 0.002 8.1 2.168 0.118 607.2 1 14/30

1 of 1 peptide matches reported, 0 removed due to filtering

IPI:IPI00782983.2|TREMBL:Q0ZCH4;Q0  
19287468 - 1K.NSLYLQM\*NSLR.A 1354.68 2 0.002 8.1 2.168 0.118 607.2 1 14/30

1 of 1 peptide matches reported, 0 removed due to filtering

IPI:IPI00783287.1|TREMBL:Q0ZCH9 Ta  
19287468 - 1K.NSLYLQM\*NSLR.A 1354.68 2 0.002 8.1 2.168 0.118 607.2 1 14/30

1 of 1 peptide matches reported, 0 removed due to filtering

IPI:IPI00783451.1|TREMBL:Q0ZCJ5 Ta  
19287468 - 1K.NSLYLQM\*NSLR.A 1354.68 2 0.002 8.1 2.168 0.118 607.2 1 14/30

1 of 1 peptide matches reported, 0 removed due to filtering

IPI:IPI00783689.1|TREMBL:Q0ZCF9;Q0  
19287468 - 1K.NSLYLQM\*NSLR.A 1354.68 2 0.002 8.1 2.168 0.118 607.2 1 14/30

1 of 1 peptide matches reported, 0 removed due to filtering

IPI:IPI00827690.1|TREMBL:A2NWX2 Ta  
19287468 - 1K.NSLYLQM\*NSLR.A 1354.68 2 0.002 8.1 2.168 0.118 607.2 1 14/30

1 of 1 peptide matches reported, 0 removed due to filtering

IPI:IPI00827733.1|TREMBL:A2NWX3 Ta  
19287468 - 1K.NSLYLQM\*NSLR.A 1354.68 2 0.002 8.1 2.168 0.118 607.2 1 14/30

1 of 1 peptide matches reported, 0 removed due to filtering

IPI:IPI00829752.1|TREMBL:A6NK61|EN  
19287468 - 1K.NSLYLQM\*NSLR.A 1354.68 2 0.002 8.1 2.168 0.118 607.2 1 14/30

1 of 1 peptide matches reported, 0 removed due to filtering

IPI:IPI00829812.2|TREMBL:A6NHF5|EN  
19287468 - 1K.NSLYLQM\*NSLR.A 1354.68 2 0.002 8.1 2.168 0.118 607.2 1 14/30

1 of 1 peptide matches reported, 0 removed due to filtering

IPI:IPI00854667.1|TREMBL:A6NKU8|EN  
19287468 - 1K.NSLYLQM\*NSLR.A 1354.68 2 0.002 8.1 2.168 0.118 607.2 1 14/30

1 of 1 peptide matches reported, 0 removed due to filtering

IPI:IPI00854841.1|TREMBL:A6NL39|EN  
19287468 - 1K.NSLYLQM\*NSLR.A 1354.68 2 0.002 8.1 2.168 0.118 607.2 1 14/30

1 of 1 peptide matches reported, 0 removed due to filtering

IPI:IPI00884078.2|TREMBL:A2J1N2|EN  
19287468 - 1K.NSLYLQM\*NSLR.A 1354.68 2 0.002 8.1 2.168 0.118 607.2 1 14/30

1 of 1 peptide matches reported, 0 removed due to filtering

IPI:IPI00884183.1|TREMBL:Q9ULB6 Ta  
19287468 - 1K.NSLYLQM\*NSLR.A 1354.68 2 0.002 8.1 2.168 0.118 607.2 1 14/30

1 of 1 peptide matches reported, 0 removed due to filtering

IPI:IPI00894177.2|TREMBL:Q9UL87|VE  
19287468 - 1K.NSLYLQM\*NSLR.A 1354.68 2 0.002 8.1 2.168 0.118 607.2 1 14/30

1 of 1 peptide matches reported, 0 removed due to filtering

IPI:IPI00914985.1|TREMBL:B6EDE2 Ta  
19287468 - 1K.NSLYLQM\*NSLR.A 1354.68 2 0.002 8.1 0.118 607.2 1 14/30

1 of 1 peptide matches reported, 0 removed due to filtering

IPI:IPI00915820.1|TREMBL:A2NYQ9 Ta  
19287468 - 1K.NSLYLQM\*NSLR.A 1354.68 2 0.002 8.1 0.118 607.2 1 14/30

1 of 1 peptide matches reported, 0 removed due to filtering

IPI:IPI00936563.1|ENSEMBL:ENSP0000  
19287468 - 1K.NSLYLQM\*NSLR.A 1354.68 2 0.002 8.1 0.118 607.2 1 14/30

1 of 1 peptide matches reported, 0 removed due to filtering

IPI:IPI00936661.1|REFSEQ:XP\_001718  
19287468 - 1K.NSLYLQM\*NSLR.A 1354.68 2 0.002 8.1 0.118 607.2 1 14/30

1 of 1 peptide matches reported, 0 removed due to filtering

IPI:IPI00937119.1|REFSEQ:XP\_002344  
19287468 - 1K.NSLYLQM\*NSLR.A 1354.68 2 0.002 8.1 0.118 607.2 1 14/30

1 of 1 peptide matches reported, 0 removed due to filtering

IPI:IPI00937583.1|TREMBL:A0N5G2|EN  
19287468 - 1K.NSLYLQM\*NSLR.A 1354.68 2 0.002 8.1 0.118 607.2 1 14/30

1 of 1 peptide matches reported, 0 removed due to filtering

IPI:IPI00937669.1|REFSEQ:XP\_002343  
19287468 - 1K.NSLYLQM\*NSLR.A 1354.68 2 0.002 8.1 0.118 607.2 1 14/30

1 of 1 peptide matches reported, 0 removed due to filtering

IPI:IPI00937796.1|TREMBL:A2J1N1;Q0  
19287468 - 1K.NSLYLQM\*NSLR.A 1354.68 2 0.002 8.1 0.118 607.2 1 14/30

1 of 1 peptide matches reported, 0 removed due to filtering

IPI:IPI00937964.1|REFSEQ:XP\_002346  
19287468 - 1K.NSLYLQM\*NSLR.A 1354.68 2 0.002 8.1 0.118 607.2 1 14/30

1 of 1 peptide matches reported, 0 removed due to filtering

IPI:IPI00550991.3|SWISS-PROT:P01011-2|TREMBL:B3KS79|ENSEMBL:EN  
19287468 - 1K.KLINDYVK.N 992.58 2 0.004 10.1 0.272 505.2 1 12/21

1 of 1 peptide matches reported, 0 removed due to filtering

IPI:IPI00847635.1|SWISS-PROT:P0101  
19287468 - 1K.KLINDYVK.N 992.58 2 0.004 10.1 0.272 505.2 1 12/21

1 of 1 peptide matches reported, 0 removed due to filtering

IPI:IPI00935915.1|ENSEMBL:ENSP0000  
19287468 - 1K.KLINDYVK.N 992.58 2 0.004 10.1 0.272 505.2 1 12/21

1 of 1 peptide matches reported, 0 removed due to filtering

IPI:IPI00019568.1|SWISS-PROT:P00734|TREMBL:B4DDT3;Q15253;Q69EZ  
19287468 - 1R.SGIECQLWR.S 1149.54 2 0.004 10.2 0.339 1292.4 1 17/24

1 of 1 peptide matches reported, 0 removed due to filtering

IPI:IPI00877967.1|VEGA:OTTHUMP0000  
19287468 - 1R.SGIECOLWR.S 1149.54 2 0.004 10.2 0.339 1292.4 1 17/24



1 of 1 peptide matches reported, 0 removed due to filtering

IPI:IPI00006662.1|SWISS-PROT:P05090|TREMBL:B2R579|ENSEMBL:ENSP  
19287468 - 1K.VLNQELR.A 871.50 2 0.004 10.1 0.309 564.0 1 13/18

1 of 1 peptide matches reported, 0 removed due to filtering

IPI:IPI00910432.1|TREMBL:B4DGC3 Ta  
19287468 - 1K.VLNQELR.A 871.50 2 0.004 10.1 0.309 564.0 1 13/18

1 of 1 peptide matches reported, 0 removed due to filtering

IPI:IPI00924574.1|VEGA:OTTHUMP0000  
19287468 - 1K.VLNQELR.A 871.50 2 0.004 10.1 0.309 564.0 1 13/18

1 of 1 peptide matches reported, 0 removed due to filtering

IPI:IPI00927914.1|VEGA:OTTHUMP0000  
19287468 - 1K.VLNQELR.A 871.50 2 0.004 10.1 0.309 564.0 1 13/18

1 of 1 peptide matches reported, 0 removed due to filtering

IPI:IPI00019580.1|SWISS-PROT:P00747|TREMBL:B2R7F8;B4DPH4;Q68DS  
19287468 - 1K.LSSPAVITDK.V 1030.58 2 0.004 10.1 0.346 201.9 1 13/27

1 of 1 peptide matches reported, 0 removed due to filtering

IPI:IPI00477714.5|TREMBL:Q5NV62|ENSEMBL:ENSP00000374818|VEGA:O  
19287468 - 1R.FSGSILGNK.A 922.50 2 0.004 10.1 0.340 661.6 1 16/24

1 of 1 peptide matches reported, 0 removed due to filtering

IPI:IPI00873719.1|TREMBL:A8MXK2|EN  
19287468 - 1R.FSGSILGNK.A 922.50 2 0.004 10.1 0.340 661.6 1 16/24

1 of 1 peptide matches reported, 0 removed due to filtering

IPI:IPI00218192.3|SWISS-PROT:Q14624-2|TREMBL:B7Z544|ENSEMBL:EN  
19287468 - 1K.ILDDLSPR.D 928.51 2 0.005 10.1 0.419 541.6 1 14/21

1 of 1 peptide matches reported, 0 removed due to filtering

IPI:IPI00791097.2|TREMBL:B7Z8Q7|VE  
19287468 - 1K.ILDDLSPR.D 928.51 2 0.005 10.1 0.419 541.6 1 14/21

1 of 1 peptide matches reported, 0 removed due to filtering

IPI:IPI00798006.1|VEGA:OTTHUMP0000  
19287468 - 1K.ILDDLSPR.D 928.51 2 0.005 10.1 0.419 541.6 1 14/21

1 of 1 peptide matches reported, 0 removed due to filtering

IPI:IPI00896413.1|ENSEMBL:ENSP0000  
19287468 - 1K.ILDDLSPR.D 928.51 2 0.005 10.1 0.419 541.6 1 14/21

1 of 1 peptide matches reported, 0 removed due to filtering

IPI:IPI00896419.2|SWISS-PROT:Q1462  
19287468 - 1K.ILDDLSPR.D 928.51 2 0.005 10.1 0.419 541.6 1 14/21

1 of 1 peptide matches reported, 0 removed due to filtering

IPI:IPI00922043.1|VEGA:OTTHUMP0000  
19287468 - 1K.ILDDLSPR.D 928.51 2 0.005 10.1 0.419 541.6 1 14/21

1 of 1 peptide matches reported, 0 removed due to filtering

IPI:IPI00022295.1|SWISS-PROT:P10720|TREMBL:A1L4S0|ENSEMBL:ENSP  
2118291816 -R.HITSLEVIK.A 1039.61 2 0.01 10.1 0.301 457.5 1 14/24

1 of 1 peptide matches reported, 0 removed due to filtering

IPI:IPI00022446.1|SWISS-PROT:P0277  
2118291816 -R.HITSLEVIK.A 1039.61 2 0.01 10.1 0.0 0 2.472 0.301 457.5 1 14/24

1 of 1 peptide matches reported, 0 removed due to filtering

IPI:IPI00384401.1|TREMBL:Q9UL85 Tax\_Id=9606 Gene\_Symbol=- Myos  
19287468 - 1R.LLIYGASTR.A 993.57 2 0.01 10.1 0.0 0 2.977 0.065 715.8 1 15/24

1 of 1 peptide matches reported, 0 removed due to filtering

IPI:IPI00385253.1|SWISS-PROT:P0420  
19287468 - 1R.LLIYGASTR.A 993.57 2 0.01 10.1 0.0 0 2.977 0.065 715.8 1 15/24

1 of 1 peptide matches reported, 0 removed due to filtering

IPI:IPI00387097.1|SWISS-PROT:P0160  
19287468 - 1R.LLIYGASTR.A 993.57 2 0.01 10.1 0.0 0 2.977 0.065 715.8 1 15/24

1 of 1 peptide matches reported, 0 removed due to filtering

IPI:IPI00387119.1|SWISS-PROT:P0162  
19287468 - 1R.LLIYGASTR.A 993.57 2 0.01 10.1 0.0 0 2.977 0.065 715.8 1 15/24

1 of 1 peptide matches reported, 0 removed due to filtering

IPI:IPI00549330.4|TREMBL:Q9UL83|EN  
19287468 - 1R.LLIYGASTR.A 993.57 2 0.01 10.1 0.0 0 2.977 0.065 715.8 1 15/24

1 of 1 peptide matches reported, 0 removed due to filtering

IPI:IPI00829834.1|SWISS-PROT:P0443  
19287468 - 1R.LLIYGASTR.A 993.57 2 0.01 10.1 0.0 0 2.977 0.065 715.8 1 15/24

1 of 1 peptide matches reported, 0 removed due to filtering

IPI:IPI00892594.1|TREMBL:A6NGI0|EN  
19287468 - 1R.LLIYGASTR.A 993.57 2 0.01 10.1 0.0 0 2.977 0.065 715.8 1 15/24

1 of 1 peptide matches reported, 0 removed due to filtering

IPI:IPI00936553.1|REFSEQ:XP\_002345  
19287468 - 1R.LLIYGASTR.A 993.57 2 0.01 10.1 0.0 0 2.977 0.065 715.8 1 15/24

1 of 1 peptide matches reported, 0 removed due to filtering

IPI:IPI00387116.1|SWISS-PROT:P01621 Tax\_Id=9606 Gene\_Symbol=-  
19287468 - 1R.LLIYGATSR.A 993.57 2 0.01 8.1 0.0 0 2.784 0.369 580.4 2 14/24

1 of 1 peptide matches reported, 0 removed due to filtering

IPI:IPI00022488.1|SWISS-PROT:P02790|TREMBL:Q9BS19|ENSEMBL:ENSP  
19287468 - 1R.LHIMAGR.R 797.45 2 0.07 18.1 0.0 0 2.141 0.129 350.3 1 10/18  
19287468 - 1K.NFPSPVDAAFR.Q 1220.61 2 0.01 2.871 0.432 324.9 1 16/30

2 of 2 peptide matches reported, 0 removed due to filtering

IPI:IPI00922564.1|TREMBL:B7Z8Q4 Ta  
19287468 - 1K.NFPSPVDAAFR.Q 1220.61 2 0.01 10.1 0.0 0 2.871 0.432 324.9 1 16/30

1 of 1 peptide matches reported, 0 removed due to filtering

IPI:IPI00027507.1|SWISS-PROT:Q02985|ENSEMBL:ENSP00000356395|RE  
19287468 - 1R.RPYFPVAVGK.Y 1133.65 2 0.02 10.2 0.0 0 3.852 0.322 1065.5 1 18/27

1 of 1 peptide matches reported, 0 removed due to filtering

|                                                                                                |                   |        |                    |                        |                       |                     |        |                |
|------------------------------------------------------------------------------------------------|-------------------|--------|--------------------|------------------------|-----------------------|---------------------|--------|----------------|
| IPI:IPI00218999.2 SWISS-PROT:P0860<br>19287468 - 1R.RPYFPVAVGK.Y                               | 1133.65           | 2      | 0.8<br>0.02        | 10.2<br>3.852          | 0.0<br>0.322          | 0<br>1065.5         | 1      | 18/27          |
| 1 of 1 peptide matches reported, 0 removed due to filtering                                    |                   |        |                    |                        |                       |                     |        |                |
| IPI:IPI00515041.5 TREMBL:A8MPQ4;Q5<br>19287468 - 1R.RPYFPVAVGK.Y                               | 1133.65           | 2      | 0.8<br>0.02        | 10.2<br>3.852          | 0.0<br>0.322          | 0<br>1065.5         | 1      | 18/27          |
| 1 of 1 peptide matches reported, 0 removed due to filtering                                    |                   |        |                    |                        |                       |                     |        |                |
| IPI:IPI00654723.1 TREMBL:B1AKF8;Q8<br>19287468 - 1R.RPYFPVAVGK.Y                               | 1133.65           | 2      | 0.8<br>0.02        | 10.2<br>3.852          | 0.0<br>0.322          | 0<br>1065.5         | 1      | 18/27          |
| 1 of 1 peptide matches reported, 0 removed due to filtering                                    |                   |        |                    |                        |                       |                     |        |                |
| IPI:IPI00844262.1 TREMBL:Q6NSD3 EN<br>19287468 - 1R.RPYFPVAVGK.Y                               | 1133.65           | 2      | 0.8<br>0.02        | 10.2<br>3.852          | 0.0<br>0.322          | 0<br>1065.5         | 1      | 18/27          |
| 1 of 1 peptide matches reported, 0 removed due to filtering                                    |                   |        |                    |                        |                       |                     |        |                |
| IPI:IPI00908535.1 TREMBL:B4DPR0 Ta<br>19287468 - 1R.RPYFPVAVGK.Y                               | 1133.65           | 2      | 0.8<br>0.02        | 10.2<br>3.852          | 0.0<br>0.322          | 0<br>1065.5         | 1      | 18/27          |
| 1 of 1 peptide matches reported, 0 removed due to filtering                                    |                   |        |                    |                        |                       |                     |        |                |
| IPI:IPI00876888.1 TREMBL:A8K008 Ta<br>19287468 - 1K.GLEWVGR.I<br>2118291816 -K.GPSVFPPLAPSSK.S | 816.44<br>1186.65 | 2<br>2 | 0.8<br>0.4<br>0.02 | 20.1<br>2.817<br>2.948 | 0.0<br>0.203<br>0.348 | 0<br>839.1<br>465.0 | 1<br>1 | 13/18<br>15/33 |
| 2 of 2 peptide matches reported, 0 removed due to filtering                                    |                   |        |                    |                        |                       |                     |        |                |
| IPI:IPI00383732.1 TREMBL:Q9Y509 Tax_Id=9606 Gene_Symbol=- VH3<br>2118291816 -K.GPSVFPPLAPSSK.S | 1186.65           | 2      | 0.8<br>0.02        | 10.1<br>2.948          | 0.0<br>0.348          | 0<br>465.0          | 1      | 15/33          |
| 1 of 1 peptide matches reported, 0 removed due to filtering                                    |                   |        |                    |                        |                       |                     |        |                |
| IPI:IPI00384938.1 TREMBL:Q7Z351 Ta<br>2118291816 -K.GPSVFPPLAPSSK.S                            | 1186.65           | 2      | 0.8<br>0.02        | 10.1<br>2.948          | 0.0<br>0.348          | 0<br>465.0          | 1      | 15/33          |
| 1 of 1 peptide matches reported, 0 removed due to filtering                                    |                   |        |                    |                        |                       |                     |        |                |
| IPI:IPI00423464.1 TREMBL:Q6N095 Ta<br>2118291816 -K.GPSVFPPLAPSSK.S                            | 1186.65           | 2      | 0.8<br>0.02        | 10.1<br>2.948          | 0.0<br>0.348          | 0<br>465.0          | 1      | 15/33          |
| 1 of 1 peptide matches reported, 0 removed due to filtering                                    |                   |        |                    |                        |                       |                     |        |                |
| IPI:IPI00423466.1 TREMBL:Q6N097 Ta<br>2118291816 -K.GPSVFPPLAPSSK.S                            | 1186.65           | 2      | 0.8<br>0.02        | 10.1<br>2.948          | 0.0<br>0.348          | 0<br>465.0          | 1      | 15/33          |
| 1 of 1 peptide matches reported, 0 removed due to filtering                                    |                   |        |                    |                        |                       |                     |        |                |
| IPI:IPI00442911.1 TREMBL:Q6ZP87 Ta<br>2118291816 -K.GPSVFPPLAPSSK.S                            | 1186.65           | 2      | 0.8<br>0.02        | 10.1<br>2.948          | 0.0<br>0.348          | 0<br>465.0          | 1      | 15/33          |
| 1 of 1 peptide matches reported, 0 removed due to filtering                                    |                   |        |                    |                        |                       |                     |        |                |
| IPI:IPI00784817.1 TREMBL:Q5EFE5 Ta<br>2118291816 -K.GPSVFPPLAPSSK.S                            | 1186.65           | 2      | 0.8<br>0.02        | 10.1<br>2.948          | 0.0<br>0.348          | 0<br>465.0          | 1      | 15/33          |
| 1 of 1 peptide matches reported, 0 removed due to filtering                                    |                   |        |                    |                        |                       |                     |        |                |
| IPI:IPI00785084.2 SWISS-PROT:P0185<br>2118291816 -K.GPSVFPPLAPSSK.S                            | 1186.65           | 2      | 0.8<br>0.02        | 10.1<br>2.948          | 0.0<br>0.348          | 0<br>465.0          | 1      | 15/33          |
| 1 of 1 peptide matches reported, 0 removed due to filtering                                    |                   |        |                    |                        |                       |                     |        |                |
| IPI:IPI00816314.1 TREMBL:Q6N096 Ta<br>2118291816 -K.GPSVFPPLAPSSK.S                            | 1186.65           | 2      | 0.8<br>0.02        | 10.1<br>2.948          | 0.0<br>0.348          | 0<br>465.0          | 1      | 15/33          |
| 1 of 1 peptide matches reported, 0 removed due to filtering                                    |                   |        |                    |                        |                       |                     |        |                |

|                                                                                               |         |   |             |               |              |             |   |       |
|-----------------------------------------------------------------------------------------------|---------|---|-------------|---------------|--------------|-------------|---|-------|
| IPI:IPI00844239.1 TREMBL:A4F255 Ta<br>2118291816 -K.GPSVFLAPSSK.S                             | 1186.65 | 2 | 0.8<br>0.02 | 10.1<br>2.948 | 0.0<br>0.348 | 0<br>465.0  | 1 | 15/33 |
| 1 of 1 peptide matches reported, 0 removed due to filtering                                   |         |   |             |               |              |             |   |       |
| IPI:IPI00892671.1 VEGA:OTTHUMP0000<br>2118291816 -K.GPSVFLAPSSK.S                             | 1186.65 | 2 | 0.8<br>0.02 | 10.1<br>2.948 | 0.0<br>0.348 | 0<br>465.0  | 1 | 15/33 |
| 1 of 1 peptide matches reported, 0 removed due to filtering                                   |         |   |             |               |              |             |   |       |
| IPI:IPI00030229.4 TREMBL:Q5QPP4 ENSEMBL:ENSP00000363622 VEGA:O<br>19287468 - 1K.TWNAVLLR.Y    | 972.56  | 2 | 0.9<br>0.03 | 10.1<br>2.663 | 0.0<br>0.089 | 0<br>1273.6 | 1 | 15/21 |
| 1 of 1 peptide matches reported, 0 removed due to filtering                                   |         |   |             |               |              |             |   |       |
| IPI:IPI00553131.2 SWISS-PROT:Q1437<br>19287468 - 1K.TWNAVLLR.Y                                | 972.56  | 2 | 0.9<br>0.03 | 10.1<br>2.663 | 0.0<br>0.089 | 0<br>1273.6 | 1 | 15/21 |
| 1 of 1 peptide matches reported, 0 removed due to filtering                                   |         |   |             |               |              |             |   |       |
| IPI:IPI00641123.1 TREMBL:Q5QPP1 VE<br>19287468 - 1K.TWNAVLLR.Y                                | 972.56  | 2 | 0.9<br>0.03 | 10.1<br>2.663 | 0.0<br>0.089 | 0<br>1273.6 | 1 | 15/21 |
| 1 of 1 peptide matches reported, 0 removed due to filtering                                   |         |   |             |               |              |             |   |       |
| IPI:IPI00644339.1 TREMBL:Q5QPP3 VE<br>19287468 - 1K.TWNAVLLR.Y                                | 972.56  | 2 | 0.9<br>0.03 | 10.1<br>2.663 | 0.0<br>0.089 | 0<br>1273.6 | 1 | 15/21 |
| 1 of 1 peptide matches reported, 0 removed due to filtering                                   |         |   |             |               |              |             |   |       |
| IPI:IPI00644364.1 TREMBL:Q5QPP2 VE<br>19287468 - 1K.TWNAVLLR.Y                                | 972.56  | 2 | 0.9<br>0.03 | 10.1<br>2.663 | 0.0<br>0.089 | 0<br>1273.6 | 1 | 15/21 |
| 1 of 1 peptide matches reported, 0 removed due to filtering                                   |         |   |             |               |              |             |   |       |
| IPI:IPI00414914.3 SWISS-PROT:P61580 Tax_Id=9606 Gene_Symbol=-<br>19287468 - 1R.WCLQVYPTAPKR.Q | 1519.77 | 2 | 0.9<br>0.04 | 8.1<br>2.492  | 0.0<br>0.609 | 0<br>380.1  | 2 | 13/33 |
| 1 of 1 peptide matches reported, 0 removed due to filtering                                   |         |   |             |               |              |             |   |       |
| IPI:IPI00414915.1 SWISS-PROT:P6158<br>19287468 - 1R.WCLQVYPTAPKR.Q                            | 1519.77 | 2 | 0.9<br>0.04 | 8.1<br>2.492  | 0.0<br>0.609 | 0<br>380.1  | 2 | 13/33 |
| 1 of 1 peptide matches reported, 0 removed due to filtering                                   |         |   |             |               |              |             |   |       |
| IPI:IPI00414916.3 SWISS-PROT:P6158<br>19287468 - 1R.WCLQVYPTAPKR.Q                            | 1519.77 | 2 | 0.9<br>0.04 | 8.1<br>2.492  | 0.0<br>0.609 | 0<br>380.1  | 2 | 13/33 |
| 1 of 1 peptide matches reported, 0 removed due to filtering                                   |         |   |             |               |              |             |   |       |
| IPI:IPI00414917.1 SWISS-PROT:P6158<br>19287468 - 1R.WCLQVYPTAPKR.Q                            | 1519.77 | 2 | 0.9<br>0.04 | 8.1<br>2.492  | 0.0<br>0.609 | 0<br>380.1  | 2 | 13/33 |
| 1 of 1 peptide matches reported, 0 removed due to filtering                                   |         |   |             |               |              |             |   |       |
| IPI:IPI00021727.1 SWISS-PROT:P04003 TREMBL:B4E1D8;B4E1E1;Q5VVQ<br>19287468 - 1K.YTCLPGYVR.S   | 1129.53 | 2 | 1<br>0.05   | 10.1<br>2.580 | 0.0<br>0.512 | 0<br>346.1  | 1 | 12/24 |
| 1 of 1 peptide matches reported, 0 removed due to filtering                                   |         |   |             |               |              |             |   |       |
| IPI:IPI00855766.1 VEGA:OTTHUMP0000<br>19287468 - 1K.YTCLPGYVR.S                               | 1129.53 | 2 | 1<br>0.05   | 10.1<br>2.580 | 0.0<br>0.512 | 0<br>346.1  | 1 | 12/24 |
| 1 of 1 peptide matches reported, 0 removed due to filtering                                   |         |   |             |               |              |             |   |       |
| IPI:IPI00872510.1 TREMBL:A8MVU6 EN<br>19287468 - 1K.YTCLPGYVR.S                               | 1129.53 | 2 | 1<br>0.05   | 10.1<br>2.580 | 0.0<br>0.512 | 0<br>346.1  | 1 | 12/24 |
| 1 of 1 peptide matches reported, 0 removed due to filtering                                   |         |   |             |               |              |             |   |       |

|                                                                                                        |         |   |   |      |      |     |        |       |       |                |
|--------------------------------------------------------------------------------------------------------|---------|---|---|------|------|-----|--------|-------|-------|----------------|
| IPI:IPI00880200.1 TREMBL:A6PVY5 VE<br>19287468 - 1K.YTCLPGYVR.S                                        | 1129.53 | 2 | 1 | 0.05 | 10.1 | 0.0 | 0      | 346.1 | 1     | 12/24          |
| 1 of 1 peptide matches reported, 0 removed due to filtering                                            |         |   |   |      |      |     |        |       |       |                |
| IPI:IPI00473011.3 SWISS-PROT:P02042 TREMBL:A0N071 ENSEMBL:ENSP<br>19287468 - 1K.LHVDPENFR.L            | 1126.56 | 2 | 1 | 0.06 | 10.1 | 0.0 | 0      | 654.7 | 1     | 14/24          |
| 1 of 1 peptide matches reported, 0 removed due to filtering                                            |         |   |   |      |      |     |        |       |       |                |
| IPI:IPI00657660.1 ENSEMBL:ENSP0000<br>19287468 - 1K.LHVDPENFR.L                                        | 1126.56 | 2 | 1 | 0.06 | 10.1 | 0.0 | 0      | 654.7 | 1     | 14/24          |
| 1 of 1 peptide matches reported, 0 removed due to filtering                                            |         |   |   |      |      |     |        |       |       |                |
| IPI:IPI00796636.14 TREMBL:A9YUX2;B<br>19287468 - 1K.LHVDPENFR.L                                        | 1126.56 | 2 | 1 | 0.06 | 10.1 | 0.0 | 0      | 654.7 | 1     | 14/24          |
| 1 of 1 peptide matches reported, 0 removed due to filtering                                            |         |   |   |      |      |     |        |       |       |                |
| IPI:IPI00829896.1 TREMBL:Q670S4 Ta<br>19287468 - 1K.LHVDPENFR.L                                        | 1126.56 | 2 | 1 | 0.06 | 10.1 | 0.0 | 0      | 654.7 | 1     | 14/24          |
| 1 of 1 peptide matches reported, 0 removed due to filtering                                            |         |   |   |      |      |     |        |       |       |                |
| IPI:IPI00871791.2 SWISS-PROT:Q96NG8 TREMBL:B4DQZ9;B7Z9R3 ENSEM<br>19287468 - 1R.VSHLTVHYRIHTGEKPYECK.E | 2455.22 | 3 | 1 | 1    | 8.1  | 0.0 | 0      | 2.157 | 0.637 | 199.9 2 17/114 |
| 1 of 1 peptide matches reported, 0 removed due to filtering                                            |         |   |   |      |      |     |        |       |       |                |
| IPI:IPI00888034.1 REFSEQ:XP_001732886 Tax_Id=9606 Gene_Symbol=<br>19287468 - 1K.VXXPCXR.R              | 871.51  | 2 | 1 | 0.06 | 8.1  | 0.0 | 0      | 1.526 | 0.312 | 361.0 2 11/18  |
| 1 of 1 peptide matches reported, 0 removed due to filtering                                            |         |   |   |      |      |     |        |       |       |                |
| IPI:IPI00021274.2 SWISS-PROT:P29322 ENSEMBL:ENSP00000166244 RE<br>19287468 - 1R.ALGITLM*GHQK.K         | 1184.65 | 2 | 1 | 1    | 8.1  | 0.0 | 0      | 1.470 | 0.526 | 80.2 12 6/30   |
| 1 of 1 peptide matches reported, 0 removed due to filtering                                            |         |   |   |      |      |     |        |       |       |                |
| gi 113580 sp P02770 ALBU_RAT SERUM ALBUMIN PRECURSOR. [MASS=68<br>19287468 - 1K.LVQEVTFDAK.T           | 1149.62 | 2 | 1 | 1    | 8.1  | 0.0 | 113580 | 2.007 | 0.529 | 95.0 6 8/27    |
| 1 of 1 peptide matches reported, 0 removed due to filtering                                            |         |   |   |      |      |     |        |       |       |                |
| IPI:IPI00382748.2 SWISS-PROT:Q5T013-3 TREMBL:A8MSM3 ENSEMBL:EN<br>19287468 - 1R.IHLMAGR.V              | 797.45  | 2 | 1 | 0.07 | 10.1 | 0.0 | 0      | 2.141 | 0.000 | 350.3 1 10/18  |
| 1 of 1 peptide matches reported, 0 removed due to filtering                                            |         |   |   |      |      |     |        |       |       |                |
| IPI:IPI00465271.2 SWISS-PROT:Q5T01<br>19287468 - 1R.IHLMAGR.V                                          | 797.45  | 2 | 1 | 0.07 | 10.1 | 0.0 | 0      | 2.141 | 0.000 | 350.3 1 10/18  |
| 1 of 1 peptide matches reported, 0 removed due to filtering                                            |         |   |   |      |      |     |        |       |       |                |
| IPI:IPI00514542.1 TREMBL:Q5T017 EN<br>19287468 - 1R.IHLMAGR.V                                          | 797.45  | 2 | 1 | 0.07 | 10.1 | 0.0 | 0      | 2.141 | 0.000 | 350.3 1 10/18  |
| 1 of 1 peptide matches reported, 0 removed due to filtering                                            |         |   |   |      |      |     |        |       |       |                |
| IPI:IPI00647220.1 TREMBL:Q5T014 EN<br>19287468 - 1R.IHLMAGR.V                                          | 797.45  | 2 | 1 | 0.07 | 10.1 | 0.0 | 0      | 2.141 | 0.000 | 350.3 1 10/18  |
| 1 of 1 peptide matches reported, 0 removed due to filtering                                            |         |   |   |      |      |     |        |       |       |                |
| IPI:IPI00743712.1 ENSEMBL:ENSP0000<br>19287468 - 1R.IHLMAGR.V                                          | 797.45  | 2 | 1 | 0.07 | 10.1 | 0.0 | 0      | 2.141 | 0.000 | 350.3 1 10/18  |
| 1 of 1 peptide matches reported, 0 removed due to filtering                                            |         |   |   |      |      |     |        |       |       |                |

|                                                                                                                                |                    |        |           |                       |                   |                   |          |               |
|--------------------------------------------------------------------------------------------------------------------------------|--------------------|--------|-----------|-----------------------|-------------------|-------------------|----------|---------------|
| IPI:IPI00847938.1 SWISS-PROT:Q5T01<br>19287468 - 1R.IHLMAGR.V                                                                  | 797.45             | 2      | 1<br>0.07 | 10.1<br>2.141         | 0.0<br>0.000      | 0<br>350.3        | 1        | 10/18         |
| 1 of 1 peptide matches reported, 0 removed due to filtering                                                                    |                    |        |           |                       |                   |                   |          |               |
| IPI:IPI00848045.1 SWISS-PROT:Q5T01<br>19287468 - 1R.IHLMAGR.V                                                                  | 797.45             | 2      | 1<br>0.07 | 10.1<br>2.141         | 0.0<br>0.000      | 0<br>350.3        | 1        | 10/18         |
| 1 of 1 peptide matches reported, 0 removed due to filtering                                                                    |                    |        |           |                       |                   |                   |          |               |
| IPI:IPI00655605.1 TREMBL:Q3C2D8 ENSEMBL:ENSP00000356952 REFSEQ<br>19287468 - 1R.GTGIALSADVGPR.K                                | 1213.65            | 2      | 1<br>1    | 8.1<br>2.499          | 0.0<br>0.397      | 0<br>295.1        | 4        | 13/36         |
| 1 of 1 peptide matches reported, 0 removed due to filtering                                                                    |                    |        |           |                       |                   |                   |          |               |
| IPI:IPI00655889.1 TREMBL:Q3C259 RE<br>19287468 - 1R.GTGIALSADVGPR.K                                                            | 1213.65            | 2      | 1<br>1    | 8.1<br>2.499          | 0.0<br>0.397      | 0<br>295.1        | 4        | 13/36         |
| 1 of 1 peptide matches reported, 0 removed due to filtering                                                                    |                    |        |           |                       |                   |                   |          |               |
| IPI:IPI00740527.3 SWISS-PROT:A8MUQ0 REFSEQ:XP_001717830_Tax_Id<br>19287468 - 1R.NQDTRM*TSRLK.F                                 | 1365.69            | 2      | 1<br>1    | 8.1<br>1.969          | 0.0<br>0.491      | 0<br>279.0        | 2        | 12/30         |
| 1 of 1 peptide matches reported, 0 removed due to filtering                                                                    |                    |        |           |                       |                   |                   |          |               |
| IPI:IPI00888926.1 REFSEQ:XP_943402<br>19287468 - 1R.NQDTRM*TSRLK.F                                                             | 1365.69            | 2      | 1<br>1    | 8.1<br>1.969          | 0.0<br>0.491      | 0<br>279.0        | 2        | 12/30         |
| 1 of 1 peptide matches reported, 0 removed due to filtering                                                                    |                    |        |           |                       |                   |                   |          |               |
| IPI:IPI00103871.3 SWISS-PROT:Q8WZ75-1 ENSEMBL:ENSP00000304945 <br>19287468 - 1R.ARGPDENVLLLRPEK.V                              | 1778.03            | 3      | 1<br>1    | 8.1<br>1.316          | 0.0<br>0.491      | 0<br>55.0         | 6        | 14/90         |
| 1 of 1 peptide matches reported, 0 removed due to filtering                                                                    |                    |        |           |                       |                   |                   |          |               |
| IPI:IPI00179778.1 TREMBL:B4DNB7;B5<br>19287468 - 1R.ARGPDENVLLLRPEK.V                                                          | 1778.03            | 3      | 1<br>1    | 8.1<br>1.316          | 0.0<br>0.491      | 0<br>55.0         | 6        | 14/90         |
| 1 of 1 peptide matches reported, 0 removed due to filtering                                                                    |                    |        |           |                       |                   |                   |          |               |
| IPI:IPI00418144.1 SWISS-PROT:Q8WZ7<br>19287468 - 1R.ARGPDENVLLLRPEK.V                                                          | 1778.03            | 3      | 1<br>1    | 8.1<br>1.316          | 0.0<br>0.491      | 0<br>55.0         | 6        | 14/90         |
| 1 of 1 peptide matches reported, 0 removed due to filtering                                                                    |                    |        |           |                       |                   |                   |          |               |
| IPI:IPI00418145.4 SWISS-PROT:Q8WZ7<br>19287468 - 1R.ARGPDENVLLLRPEK.V                                                          | 1778.03            | 3      | 1<br>1    | 8.1<br>1.316          | 0.0<br>0.491      | 0<br>55.0         | 6        | 14/90         |
| 1 of 1 peptide matches reported, 0 removed due to filtering                                                                    |                    |        |           |                       |                   |                   |          |               |
| IPI:IPI00782966.1 SWISS-PROT:Q9H2Y7 TREMBL:B4DGC7;B4DZ40;Q05C4<br>19287468 - 1K.SLSQKQDPK.N<br>19287468 - 1K.LIKGGKVTSTWEDSR.T | 1030.55<br>1777.94 | 2<br>3 | 1<br>1    | 4.1<br>1.289<br>1.235 | 0.0<br>0.531<br>- | 0<br>59.0<br>42.4 | 19<br>23 | 7/24<br>12/90 |
| 2 of 2 peptide matches reported, 0 removed due to filtering                                                                    |                    |        |           |                       |                   |                   |          |               |
| IPI:IPI00166518.6 SWISS-PROT:Q6WCQ1-3 TREMBL:Q5ZEZ6;Q96EE5 ENS<br>19287468 - 1K.EEESAMSSDR.M                                   | 1140.45            | 2      | 1<br>1    | 8.1<br>1.408          | 0.0<br>0.594      | 0<br>105.5        | 5        | 8/27          |
| 1 of 1 peptide matches reported, 0 removed due to filtering                                                                    |                    |        |           |                       |                   |                   |          |               |
| IPI:IPI00295457.6 SWISS-PROT:Q6WCQ<br>19287468 - 1K.EEESAMSSDR.M                                                               | 1140.45            | 2      | 1<br>1    | 8.1<br>1.408          | 0.0<br>0.594      | 0<br>105.5        | 5        | 8/27          |
| 1 of 1 peptide matches reported, 0 removed due to filtering                                                                    |                    |        |           |                       |                   |                   |          |               |
| IPI:IPI00305344.7 SWISS-PROT:Q6WCQ<br>19287468 - 1K.EEESAMSSDR.M                                                               | 1140.45            | 2      | 1<br>1    | 8.1<br>1.408          | 0.0<br>0.594      | 0<br>105.5        | 5        | 8/27          |
| 1 of 1 peptide matches reported, 0 removed due to filtering                                                                    |                    |        |           |                       |                   |                   |          |               |

|                                                                                                    |         |   |     |      |     |   |       |       |       |   |        |
|----------------------------------------------------------------------------------------------------|---------|---|-----|------|-----|---|-------|-------|-------|---|--------|
| IPI:IPI00796460.1 TREMBL:A8MTJ7 VE<br>19287468 - 1K.EEESAMSSDR.M                                   | 1140.45 | 2 | 1   | 8.1  | 0.0 | 0 | 1.408 | 0.594 | 105.5 | 5 | 8/27   |
| 1 of 1 peptide matches reported, 0 removed due to filtering                                        |         |   |     |      |     |   |       |       |       |   |        |
| IPI:IPI00797228.1 VEGA:OTTHUMP0000<br>19287468 - 1K.EEESAMSSDR.M                                   | 1140.45 | 2 | 1   | 8.1  | 0.0 | 0 | 1.408 | 0.594 | 105.5 | 5 | 8/27   |
| 1 of 1 peptide matches reported, 0 removed due to filtering                                        |         |   |     |      |     |   |       |       |       |   |        |
| IPI:IPI00382420.1 SWISS-PROT:P01700 Tax_Id=9606 Gene_Symbol=-<br>K.RPSGVPDR.F                      | 883.47  | 2 | 0.1 | 10.1 | 0.0 | 0 | 2.914 | 0.384 | 612.6 | 1 | 14/21  |
| 1 of 1 peptide matches reported, 0 removed due to filtering                                        |         |   |     |      |     |   |       |       |       |   |        |
| IPI:IPI00382426.1 SWISS-PROT:P0170<br>K.RPSGVPDR.F                                                 | 883.47  | 2 | 0.1 | 10.1 | 0.0 | 0 | 2.914 | 0.384 | 612.6 | 1 | 14/21  |
| 1 of 1 peptide matches reported, 0 removed due to filtering                                        |         |   |     |      |     |   |       |       |       |   |        |
| IPI:IPI00382427.1 SWISS-PROT:P0170<br>K.RPSGVPDR.F                                                 | 883.47  | 2 | 0.1 | 10.1 | 0.0 | 0 | 2.914 | 0.384 | 612.6 | 1 | 14/21  |
| 1 of 1 peptide matches reported, 0 removed due to filtering                                        |         |   |     |      |     |   |       |       |       |   |        |
| IPI:IPI00382434.1 SWISS-PROT:P0171<br>K.RPSGVPDR.F                                                 | 883.47  | 2 | 0.1 | 10.1 | 0.0 | 0 | 2.914 | 0.384 | 612.6 | 1 | 14/21  |
| 1 of 1 peptide matches reported, 0 removed due to filtering                                        |         |   |     |      |     |   |       |       |       |   |        |
| IPI:IPI00383016.1 TREMBL:Q8TE63 Ta<br>K.RPSGVPDR.F                                                 | 883.47  | 2 | 0.1 | 10.1 | 0.0 | 0 | 2.914 | 0.384 | 612.6 | 1 | 14/21  |
| 1 of 1 peptide matches reported, 0 removed due to filtering                                        |         |   |     |      |     |   |       |       |       |   |        |
| IPI:IPI00827815.1 TREMBL:A2NYV4 Ta<br>K.RPSGVPDR.F                                                 | 883.47  | 2 | 0.1 | 10.1 | 0.0 | 0 | 2.914 | 0.384 | 612.6 | 1 | 14/21  |
| 1 of 1 peptide matches reported, 0 removed due to filtering                                        |         |   |     |      |     |   |       |       |       |   |        |
| IPI:IPI00828048.1 TREMBL:A2KUC4 Ta<br>K.RPSGVPDR.F                                                 | 883.47  | 2 | 0.1 | 10.1 | 0.0 | 0 | 2.914 | 0.384 | 612.6 | 1 | 14/21  |
| 1 of 1 peptide matches reported, 0 removed due to filtering                                        |         |   |     |      |     |   |       |       |       |   |        |
| IPI:IPI00828149.1 TREMBL:A2NYQ8 Ta<br>K.RPSGVPDR.F                                                 | 883.47  | 2 | 0.1 | 10.1 | 0.0 | 0 | 2.914 | 0.384 | 612.6 | 1 | 14/21  |
| 1 of 1 peptide matches reported, 0 removed due to filtering                                        |         |   |     |      |     |   |       |       |       |   |        |
| IPI:IPI00890754.1 TREMBL:B1N7B6 Tax_Id=9606 Gene_Symbol=- Cryo<br>19287468 - 1K.NTVYLQM*NSLR.A     | 1354.68 | 2 | 0.1 | 10.1 | 0.0 | 0 | 2.168 | 0.000 | 607.2 | 1 | 14/30  |
| 1 of 1 peptide matches reported, 0 removed due to filtering                                        |         |   |     |      |     |   |       |       |       |   |        |
| IPI:IPI00022438.1 SWISS-PROT:O75444-1 TREMBL:Q8IX32 ENSEMBL:EN<br>19287468 - 1R.VQQRHVLESEK.N      | 1352.73 | 2 | 1   | 8.1  | 0.0 | 0 | 1.436 | 0.647 | 201.9 | 2 | 10/30  |
| 1 of 1 peptide matches reported, 0 removed due to filtering                                        |         |   |     |      |     |   |       |       |       |   |        |
| IPI:IPI00219060.1 SWISS-PROT:O7544<br>19287468 - 1R.VQQRHVLESEK.N                                  | 1352.73 | 2 | 1   | 8.1  | 0.0 | 0 | 1.436 | 0.647 | 201.9 | 2 | 10/30  |
| 1 of 1 peptide matches reported, 0 removed due to filtering                                        |         |   |     |      |     |   |       |       |       |   |        |
| IPI:IPI00445079.1 TREMBL:Q6ZTG6 REFSEQ:XP_001714376;XP_0017207<br>19287468 - 1R.LYLNAHVVPQSSRPRP.- | 2085.14 | 3 | 0.1 | 8.1  | 0.0 | 0 | 1.550 | 0.564 | 118.3 | 8 | 13/108 |
| 1 of 1 peptide matches reported, 0 removed due to filtering                                        |         |   |     |      |     |   |       |       |       |   |        |

|                                                                                                     |         |   |     |      |     |   |       |    |        |
|-----------------------------------------------------------------------------------------------------|---------|---|-----|------|-----|---|-------|----|--------|
| IPI:IPI00935923.1 REFSEQ:XP_002342<br>19287468 - 1R.LYLNAHVVPGPQSSRPRP.-                            | 2085.14 | 3 | 0.1 | 8.1  | 0.0 | 0 | 118.3 | 8  | 13/108 |
| 1 of 1 peptide matches reported, 0 removed due to filtering                                         |         |   |     |      |     |   |       |    |        |
| IPI:IPI00418845.1 TREMBL:Q6ZS85 H-INV:HIT000047515 Tax_Id=9606<br>19287468 - 1R.GPASRTPSR.A         | 928.50  | 2 | 1   | 8.1  | 0.0 | 0 | 166.7 | 10 | 10/24  |
| 1 of 1 peptide matches reported, 0 removed due to filtering                                         |         |   |     |      |     |   |       |    |        |
| IPI:IPI00069817.2 SWISS-PROT:Q9UIG0-1 ENSEMBL:ENSP00000342434;<br>2118291816 -R.WASMSEQRK.E         | 1251.58 | 2 | 1   | 8.1  | 0.0 | 0 | 32.9  | 10 | 7/27   |
| 1 of 1 peptide matches reported, 0 removed due to filtering                                         |         |   |     |      |     |   |       |    |        |
| IPI:IPI00216695.1 SWISS-PROT:Q9UIG<br>2118291816 -R.WASMSEQRK.E                                     | 1251.58 | 2 | 1   | 8.1  | 0.0 | 0 | 32.9  | 10 | 7/27   |
| 1 of 1 peptide matches reported, 0 removed due to filtering                                         |         |   |     |      |     |   |       |    |        |
| IPI:IPI00411614.1 SWISS-PROT:O75717 TREMBL:A8KAE0;Q05DR3 ENSEM<br>19287468 - 1K.GETASEGTEAKRK.R     | 1491.78 | 3 | 1   | 8.1  | 0.0 | 0 | 168.0 | 2  | 16/78  |
| 1 of 1 peptide matches reported, 0 removed due to filtering                                         |         |   |     |      |     |   |       |    |        |
| IPI:IPI00513835.1 TREMBL:A8MRA5;B3<br>19287468 - 1K.GETASEGTEAKRK.R                                 | 1491.78 | 3 | 1   | 8.1  | 0.0 | 0 | 168.0 | 2  | 16/78  |
| 1 of 1 peptide matches reported, 0 removed due to filtering                                         |         |   |     |      |     |   |       |    |        |
| IPI:IPI00418991.5 SWISS-PROT:Q2KHR3-1 TREMBL:B3KWV1 ENSEMBL:EN<br>19287468 - 1K.GKGQVKEEDNSNQK.Q    | 1560.76 | 2 | 0.2 | 10.1 | 0.0 | 0 | 212.8 | 1  | 11/39  |
| 1 of 1 peptide matches reported, 0 removed due to filtering                                         |         |   |     |      |     |   |       |    |        |
| IPI:IPI00745241.1 TREMBL:Q9H6S7 Ta<br>19287468 - 1K.GKGQVKEEDNSNQK.Q                                | 1560.76 | 2 | 0.2 | 10.1 | 0.0 | 0 | 212.8 | 1  | 11/39  |
| 1 of 1 peptide matches reported, 0 removed due to filtering                                         |         |   |     |      |     |   |       |    |        |
| IPI:IPI00847870.1 SWISS-PROT:Q2KHR<br>19287468 - 1K.GKGQVKEEDNSNQK.Q                                | 1560.76 | 2 | 0.2 | 10.1 | 0.0 | 0 | 212.8 | 1  | 11/39  |
| 1 of 1 peptide matches reported, 0 removed due to filtering                                         |         |   |     |      |     |   |       |    |        |
| IPI:IPI00003330.4 SWISS-PROT:Q9NTU4 ENSEMBL:ENSP00000330877 RE<br>19287468 - 1K.SSSM*SSLNIAKHMPHR.A | 1798.87 | 2 | 0.2 | 8.1  | 0.0 | 0 | 81.9  | 6  | 7/45   |
| 1 of 1 peptide matches reported, 0 removed due to filtering                                         |         |   |     |      |     |   |       |    |        |
| IPI:IPI00477176.1 SWISS-PROT:Q96LC9-1 ENSEMBL:ENSP00000346697;<br>19287468 - 1K.LQCIADQFHR.L        | 1288.61 | 2 | 1   | 8.1  | 0.0 | 0 | 61.6  | 3  | 6/27   |
| 1 of 1 peptide matches reported, 0 removed due to filtering                                         |         |   |     |      |     |   |       |    |        |
| IPI:IPI00783294.1 SWISS-PROT:Q9P267-1 TREMBL:B4E2U1 ENSEMBL:EN<br>19287468 - 1K.SVNGCVSPSPDAK.S     | 1318.59 | 2 | 0.2 | 8.1  | 0.0 | 0 | 149.8 | 3  | 10/36  |
| 1 of 1 peptide matches reported, 0 removed due to filtering                                         |         |   |     |      |     |   |       |    |        |
| IPI:IPI00879134.1 TREMBL:B3KQW0 EN<br>19287468 - 1K.SVNGCVSPSPDAK.S                                 | 1318.59 | 2 | 0.2 | 8.1  | 0.0 | 0 | 149.8 | 3  | 10/36  |
| 1 of 1 peptide matches reported, 0 removed due to filtering                                         |         |   |     |      |     |   |       |    |        |
| IPI:IPI00936423.1 REFSEQ:XP_002343325 Tax_Id=9606 Gene_Symbol=<br>19287468 - 1K.FLGLIM*GR.G         | 922.52  | 2 | 0.3 | 8.1  | 0.0 | 0 | 193.5 | 3  | 10/21  |
| 1 of 1 peptide matches reported, 0 removed due to filtering                                         |         |   |     |      |     |   |       |    |        |



|                                                                                                 |         |   |     |      |     |   |       |    |       |
|-------------------------------------------------------------------------------------------------|---------|---|-----|------|-----|---|-------|----|-------|
| IPI:IPI00937991.1 REFSEQ:XP_002347<br>19287468 - 1K.FLGLIM*GR.G                                 | 922.52  | 2 | 0.3 | 8.1  | 0.0 | 0 | 193.5 | 3  | 10/21 |
| 1 of 1 peptide matches reported, 0 removed due to filtering                                     |         |   |     |      |     |   |       |    |       |
| IPI:IPI00893555.1 VEGA:OTTHUMP00000201682 Tax_Id=9606 Gene_Sym<br>19287468 - 1R.MFVSTVWTR.M     | 1126.57 | 2 | 1   | 8.1  | 0.0 | 0 | 69.9  | 27 | 5/24  |
| 1 of 1 peptide matches reported, 0 removed due to filtering                                     |         |   |     |      |     |   |       |    |       |
| IPI:IPI00328929.3 SWISS-PROT:Q86VM9-1 ENSEMBL:ENSP00000301011 <br>2118291816 -K.LTLLNKAADK.G    | 1086.65 | 2 | 0.4 | 8.1  | 0.0 | 0 | 185.2 | 3  | 10/27 |
| 1 of 1 peptide matches reported, 0 removed due to filtering                                     |         |   |     |      |     |   |       |    |       |
| IPI:IPI00642285.1 TREMBL:B3KRL4 VE<br>2118291816 -K.LTLLNKAADK.G                                | 1086.65 | 2 | 0.4 | 8.1  | 0.0 | 0 | 185.2 | 3  | 10/27 |
| 1 of 1 peptide matches reported, 0 removed due to filtering                                     |         |   |     |      |     |   |       |    |       |
| IPI:IPI00908725.1 TREMBL:B4DTK7 Ta<br>2118291816 -K.LTLLNKAADK.G                                | 1086.65 | 2 | 0.4 | 8.1  | 0.0 | 0 | 185.2 | 3  | 10/27 |
| 1 of 1 peptide matches reported, 0 removed due to filtering                                     |         |   |     |      |     |   |       |    |       |
| IPI:IPI00065529.1 TREMBL:Q96MJ9 H-INV:HIT000013428 Tax_Id=9606<br>2118291816 -R.GDLSGASGPAETR.G | 1217.58 | 2 | 1   | 8.1  | 0.0 | 0 | 107.4 | 3  | 8/36  |
| 1 of 1 peptide matches reported, 0 removed due to filtering                                     |         |   |     |      |     |   |       |    |       |
| IPI:IPI00384404.4 TREMBL:A2J1N6 Tax_Id=9606 Gene_Symbol=- Rheu<br>19287468 - 1K.GLEWVGR.I       | 816.44  | 2 | 0.4 | 10.1 | 0.0 | 0 | 839.1 | 1  | 13/18 |
| 1 of 1 peptide matches reported, 0 removed due to filtering                                     |         |   |     |      |     |   |       |    |       |
| IPI:IPI00783024.1 TREMBL:Q9UL88 Ta<br>19287468 - 1K.GLEWVGR.I                                   | 816.44  | 2 | 0.4 | 10.1 | 0.0 | 0 | 839.1 | 1  | 13/18 |
| 1 of 1 peptide matches reported, 0 removed due to filtering                                     |         |   |     |      |     |   |       |    |       |
| IPI:IPI00783184.1 TREMBL:Q0ZC10 Ta<br>19287468 - 1K.GLEWVGR.I                                   | 816.44  | 2 | 0.4 | 10.1 | 0.0 | 0 | 839.1 | 1  | 13/18 |
| 1 of 1 peptide matches reported, 0 removed due to filtering                                     |         |   |     |      |     |   |       |    |       |
| IPI:IPI00827892.1 TREMBL:A2N2G5 Ta<br>19287468 - 1K.GLEWVGR.I                                   | 816.44  | 2 | 0.4 | 10.1 | 0.0 | 0 | 839.1 | 1  | 13/18 |
| 1 of 1 peptide matches reported, 0 removed due to filtering                                     |         |   |     |      |     |   |       |    |       |
| IPI:IPI00829590.1 TREMBL:A6NNW3 EN<br>19287468 - 1K.GLEWVGR.I                                   | 816.44  | 2 | 0.4 | 10.1 | 0.0 | 0 | 839.1 | 1  | 13/18 |
| 1 of 1 peptide matches reported, 0 removed due to filtering                                     |         |   |     |      |     |   |       |    |       |
| IPI:IPI00829841.1 ENSEMBL:ENSP0000<br>19287468 - 1K.GLEWVGR.I                                   | 816.44  | 2 | 0.4 | 10.1 | 0.0 | 0 | 839.1 | 1  | 13/18 |
| 1 of 1 peptide matches reported, 0 removed due to filtering                                     |         |   |     |      |     |   |       |    |       |
| IPI:IPI00921238.1 H-INV:HIT0003928<br>19287468 - 1K.GLEWVGR.I                                   | 816.44  | 2 | 0.4 | 10.1 | 0.0 | 0 | 839.1 | 1  | 13/18 |
| 1 of 1 peptide matches reported, 0 removed due to filtering                                     |         |   |     |      |     |   |       |    |       |
| IPI:IPI00936370.1 TREMBL:Q0ZCJ6 EN<br>19287468 - 1K.GLEWVGR.I                                   | 816.44  | 2 | 0.4 | 10.1 | 0.0 | 0 | 839.1 | 1  | 13/18 |
| 1 of 1 peptide matches reported, 0 removed due to filtering                                     |         |   |     |      |     |   |       |    |       |

|                                                                                                |         |   |     |      |     |   |       |       |        |    |       |
|------------------------------------------------------------------------------------------------|---------|---|-----|------|-----|---|-------|-------|--------|----|-------|
| IPI:IPI00021856.3 SWISS-PROT:P02655 TREMBL:C0JYY4;Q6P163 ENSEM<br>19287468 - 1K.LRDLYSK.S      | 894.50  | 2 | 0.6 | 10.1 | 0.0 | 0 | 2.716 | 0.205 | 1098.8 | 1  | 15/18 |
| 1 of 1 peptide matches reported, 0 removed due to filtering                                    |         |   |     |      |     |   |       |       |        |    |       |
| IPI:IPI00555595.1 TREMBL:Q59GS1 Tax_Id=9606 Gene_Symbol=UCHL1<br>19287468 - 1R.RGRPPVPAAGR.D   | 1133.67 | 2 | 1   | 8.1  | 0.0 | 0 | 2.610 | 0.428 | 386.9  | 2  | 13/30 |
| 1 of 1 peptide matches reported, 0 removed due to filtering                                    |         |   |     |      |     |   |       |       |        |    |       |
| IPI:IPI00937422.1 REFSEQ:XP_002346542 Tax_Id=9606 Gene_Symbol=<br>19287468 - 1R.KGSNIGQLR.P    | 972.56  | 2 | 0.4 | 8.1  | 0.0 | 0 | 2.427 | 0.100 | 721.2  | 2  | 13/24 |
| 1 of 1 peptide matches reported, 0 removed due to filtering                                    |         |   |     |      |     |   |       |       |        |    |       |
| IPI:IPI00168913.1 SWISS-PROT:Q86UK5-2 TREMBL:Q4W5A4;Q4W5B1 ENS<br>19287468 - 1R.SAVECSNLLR.T   | 1149.56 | 2 | 0.4 | 8.1  | 0.0 | 0 | 2.306 | 0.370 | 355.1  | 4  | 12/27 |
| 1 of 1 peptide matches reported, 0 removed due to filtering                                    |         |   |     |      |     |   |       |       |        |    |       |
| IPI:IPI00382523.1 SWISS-PROT:Q86UK<br>19287468 - 1R.SAVECSNLLR.T                               | 1149.56 | 2 | 0.4 | 8.1  | 0.0 | 0 | 2.306 | 0.370 | 355.1  | 4  | 12/27 |
| 1 of 1 peptide matches reported, 0 removed due to filtering                                    |         |   |     |      |     |   |       |       |        |    |       |
| IPI:IPI00382525.1 SWISS-PROT:Q86UK<br>19287468 - 1R.SAVECSNLLR.T                               | 1149.56 | 2 | 0.4 | 8.1  | 0.0 | 0 | 2.306 | 0.370 | 355.1  | 4  | 12/27 |
| 1 of 1 peptide matches reported, 0 removed due to filtering                                    |         |   |     |      |     |   |       |       |        |    |       |
| IPI:IPI00375358.2 SWISS-PROT:P35251-1 TREMBL:A8K6E7 ENSEMBL:EN<br>19287468 - 1K.IGEVSSPK.A     | 816.45  | 2 | 0.6 | 8.1  | 0.0 | 0 | 2.245 | 0.317 | 420.5  | 3  | 11/21 |
| 1 of 1 peptide matches reported, 0 removed due to filtering                                    |         |   |     |      |     |   |       |       |        |    |       |
| IPI:IPI00375359.2 SWISS-PROT:P3525<br>19287468 - 1K.IGEVSSPK.A                                 | 816.45  | 2 | 0.6 | 8.1  | 0.0 | 0 | 2.245 | 0.317 | 420.5  | 3  | 11/21 |
| 1 of 1 peptide matches reported, 0 removed due to filtering                                    |         |   |     |      |     |   |       |       |        |    |       |
| IPI:IPI00065348.2 TREMBL:B1AL16;Q05BG6;Q96LW0 ENSEMBL:ENSP0000<br>19287468 - 1R.LSITGTEQFERK.L | 1408.74 | 2 | 0.7 | 8.1  | 0.0 | 0 | 2.224 | 0.498 | 271.7  | 3  | 11/33 |
| 1 of 1 peptide matches reported, 0 removed due to filtering                                    |         |   |     |      |     |   |       |       |        |    |       |
| IPI:IPI00293188.5 SWISS-PROT:Q8IX2<br>19287468 - 1R.LSITGTEQFERK.L                             | 1408.74 | 2 | 0.7 | 8.1  | 0.0 | 0 | 2.224 | 0.498 | 271.7  | 3  | 11/33 |
| 1 of 1 peptide matches reported, 0 removed due to filtering                                    |         |   |     |      |     |   |       |       |        |    |       |
| IPI:IPI00640126.1 TREMBL:B1AL17 EN<br>19287468 - 1R.LSITGTEQFERK.L                             | 1408.74 | 2 | 0.7 | 8.1  | 0.0 | 0 | 2.224 | 0.498 | 271.7  | 3  | 11/33 |
| 1 of 1 peptide matches reported, 0 removed due to filtering                                    |         |   |     |      |     |   |       |       |        |    |       |
| IPI:IPI00217895.4 SWISS-PROT:Q6S5L8-1 TREMBL:B3KWT2 ENSEMBL:EN<br>2118291816 -K.SNLQFSGMNIK.L  | 1238.62 | 2 | 0.8 | 8.1  | 0.0 | 0 | 2.210 | 0.498 | 104.6  | 16 | 8/30  |
| 1 of 1 peptide matches reported, 0 removed due to filtering                                    |         |   |     |      |     |   |       |       |        |    |       |
| IPI:IPI00043430.5 SWISS-PROT:Q8IUR5-2 TREMBL:B3KVVW1 ENSEMBL:EN<br>19287468 - 1R.LLSAIYSK.Q    | 894.53  | 2 | 0.8 | 8.1  | 0.0 | 0 | 2.159 | 0.253 | 634.7  | 2  | 13/21 |
| 1 of 1 peptide matches reported, 0 removed due to filtering                                    |         |   |     |      |     |   |       |       |        |    |       |
| IPI:IPI00216822.3 SWISS-PROT:Q8IUR<br>19287468 - 1R.LLSAIYSK.Q                                 | 894.53  | 2 | 0.8 | 8.1  | 0.0 | 0 | 2.159 | 0.253 | 634.7  | 2  | 13/21 |
| 1 of 1 peptide matches reported, 0 removed due to filtering                                    |         |   |     |      |     |   |       |       |        |    |       |

|                                                                                                  |         |   |          |              |              |                 |    |       |
|--------------------------------------------------------------------------------------------------|---------|---|----------|--------------|--------------|-----------------|----|-------|
| IPI:IPI00795924.2 SWISS-PROT:Q8IUR<br>19287468 - 1R.LLSAIYSK.Q                                   | 894.53  | 2 | 1<br>0.8 | 8.1<br>2.159 | 0.0<br>0.253 | 0<br>634.7      | 2  | 13/21 |
| 1 of 1 peptide matches reported, 0 removed due to filtering                                      |         |   |          |              |              |                 |    |       |
| IPI:IPI00433499.6 SWISS-PROT:Q6PJF5-1 ENSEMBL:ENSP00000322775 <br>19287468 - 1K.EYGRAPVPGPR.R    | 1198.63 | 2 | 1<br>0.8 | 8.1<br>2.135 | 0.0<br>0.461 | 0<br>245.0      | 3  | 11/30 |
| 1 of 1 peptide matches reported, 0 removed due to filtering                                      |         |   |          |              |              |                 |    |       |
| IPI:IPI00446876.3 TREMBL:Q6ZWP8 EN<br>19287468 - 1K.EYGRAPVPGPR.R                                | 1198.63 | 2 | 1<br>0.8 | 8.1<br>2.135 | 0.0<br>0.461 | 0<br>245.0      | 3  | 11/30 |
| 1 of 1 peptide matches reported, 0 removed due to filtering                                      |         |   |          |              |              |                 |    |       |
| IPI:IPI00470604.2 SWISS-PROT:Q6PJF<br>19287468 - 1K.EYGRAPVPGPR.R                                | 1198.63 | 2 | 1<br>0.8 | 8.1<br>2.135 | 0.0<br>0.461 | 0<br>245.0      | 3  | 11/30 |
| 1 of 1 peptide matches reported, 0 removed due to filtering                                      |         |   |          |              |              |                 |    |       |
| IPI:IPI00922473.1 TREMBL:B7Z8H4 Ta<br>19287468 - 1K.EYGRAPVPGPR.R                                | 1198.63 | 2 | 1<br>0.8 | 8.1<br>2.135 | 0.0<br>0.461 | 0<br>245.0      | 3  | 11/30 |
| 1 of 1 peptide matches reported, 0 removed due to filtering                                      |         |   |          |              |              |                 |    |       |
| IPI:IPI00023129.1 SWISS-PROT:O95813 TREMBL:Q3SY34 ENSEMBL:ENSP<br>19287468 - 1R.FWKKPEREM*HPSR.D | 1743.87 | 2 | 1<br>1   | 8.1<br>2.081 | 0.0<br>0.445 | 0<br>89.0       | 4  | 8/36  |
| 1 of 1 peptide matches reported, 0 removed due to filtering                                      |         |   |          |              |              |                 |    |       |
| IPI:IPI00009771.6 H-INV:HIT000278695 VEGA:OTTHUMP00000077225 T<br>2118291816 -K.LRAELDEVNK.S     | 1186.64 | 2 | 1<br>1   | 8.1<br>1.923 | 0.0<br>0.445 | 0<br>146.4      | 3  | 9/27  |
| 1 of 1 peptide matches reported, 0 removed due to filtering                                      |         |   |          |              |              |                 |    |       |
| IPI:IPI00879819.1 SWISS-PROT:Q0325<br>2118291816 -K.LRAELDEVNK.S                                 | 1186.64 | 2 | 1<br>1   | 8.1<br>1.923 | 0.0<br>0.445 | 0<br>146.4      | 3  | 9/27  |
| 1 of 1 peptide matches reported, 0 removed due to filtering                                      |         |   |          |              |              |                 |    |       |
| IPI:IPI00032087.4 SWISS-PROT:Q9Y2E4 TREMBL:Q86XV3 ENSEMBL:ENSP<br>2118291816 -K.LLWFVTESK.H      | 1122.62 | 2 | 1<br>1   | 8.1<br>1.798 | 0.0<br>0.549 | 0<br>133.1      | 18 | 8/24  |
| 1 of 1 peptide matches reported, 0 removed due to filtering                                      |         |   |          |              |              |                 |    |       |
| IPI:IPI00643330.5 TREMBL:B3KWX2;Q5<br>2118291816 -K.LLWFVTESK.H                                  | 1122.62 | 2 | 1<br>1   | 8.1<br>1.798 | 0.0<br>0.549 | 0<br>133.1      | 18 | 8/24  |
| 1 of 1 peptide matches reported, 0 removed due to filtering                                      |         |   |          |              |              |                 |    |       |
| IPI:IPI00018279.7 SWISS-PROT:P25940 TREMBL:Q59GD4 ENSEMBL:ENSP<br>R.RPPGTAER.P                   | 883.47  | 2 | 1<br>1   | 8.1<br>1.794 | 0.0<br>0.387 | 0<br>146.8      | 6  | 7/21  |
| 1 of 1 peptide matches reported, 0 removed due to filtering                                      |         |   |          |              |              |                 |    |       |
| IPI:IPI00021304.1 SWISS-PROT:P35908 ENSEMBL:ENSP00000310861 RE<br>19287468 - 1K.KDVDNAYMIK.V     | 1196.60 | 2 | 1<br>1   | 8.1<br>1.761 | 0.0<br>0.589 | 0<br>130.6      | 4  | 8/27  |
| 1 of 1 peptide matches reported, 0 removed due to filtering                                      |         |   |          |              |              |                 |    |       |
| gi 254622 bbs 112352 (S43646) cyto<br>19287468 - 1K.KDVDNAYMIK.V                                 | 1196.60 | 2 | 1<br>1   | 8.1<br>1.761 | 0.0<br>0.589 | 254622<br>130.6 | 4  | 8/27  |
| 1 of 1 peptide matches reported, 0 removed due to filtering                                      |         |   |          |              |              |                 |    |       |
| gi 547754 sp P35908 K22E_HUMAN KER<br>19287468 - 1K.KDVDNAYMIK.V                                 | 1196.60 | 2 | 1<br>1   | 8.1<br>1.761 | 0.0<br>0.589 | 547754<br>130.6 | 4  | 8/27  |
| 1 of 1 peptide matches reported, 0 removed due to filtering                                      |         |   |          |              |              |                 |    |       |

|                                                                                                     |         |   |          |              |              |            |    |       |
|-----------------------------------------------------------------------------------------------------|---------|---|----------|--------------|--------------|------------|----|-------|
| IPI:IPI00418876.3 SWISS-PROT:Q70Z35-1 TREMBL:B4DFX0 ENSEMBL:EN<br>19287468 - 1K.LSCPRLR.L           | 1030.58 | 2 | 1<br>0.9 | 8.1<br>1.753 | 0.0<br>0.426 | 0<br>105.7 | 3  | 9/21  |
| 1 of 1 peptide matches reported, 0 removed due to filtering                                         |         |   |          |              |              |            |    |       |
| IPI:IPI00845229.1 SWISS-PROT:Q70Z3<br>19287468 - 1K.LSCPRLR.L                                       | 1030.58 | 2 | 1<br>0.9 | 8.1<br>1.753 | 0.0<br>0.426 | 0<br>105.7 | 3  | 9/21  |
| 1 of 1 peptide matches reported, 0 removed due to filtering                                         |         |   |          |              |              |            |    |       |
| IPI:IPI00294519.2 SWISS-PROT:Q99973-1 ENSEMBL:ENSP00000262715 <br>19287468 - 1R.QLLTRPHK.A          | 992.60  | 2 | 1<br>0.8 | 8.1<br>1.747 | 0.0<br>0.306 | 0<br>184.8 | 5  | 8/21  |
| 1 of 1 peptide matches reported, 0 removed due to filtering                                         |         |   |          |              |              |            |    |       |
| IPI:IPI00413874.2 SWISS-PROT:Q9997<br>19287468 - 1R.QLLTRPHK.A                                      | 992.60  | 2 | 1<br>0.8 | 8.1<br>1.747 | 0.0<br>0.306 | 0<br>184.8 | 5  | 8/21  |
| 1 of 1 peptide matches reported, 0 removed due to filtering                                         |         |   |          |              |              |            |    |       |
| IPI:IPI00448364.1 TREMBL:Q6IEV0 H-INV:HIT000391565 Tax_Id=9606<br>2118291816 -R.IHSTQGRK.V          | 1039.60 | 2 | 1<br>0.4 | 8.1<br>1.729 | 0.0<br>0.349 | 0<br>149.9 | 3  | 9/24  |
| 1 of 1 peptide matches reported, 0 removed due to filtering                                         |         |   |          |              |              |            |    |       |
| IPI:IPI00307200.9 SWISS-PROT:Q9UH65 TREMBL:B4E245 ENSEMBL:ENSP<br>19287468 - 1K.KLEEAASRAAEEEK.K    | 1560.79 | 2 | 1<br>1   | 8.1<br>1.699 | 0.0<br>0.383 | 0<br>106.1 | 4  | 9/39  |
| 1 of 1 peptide matches reported, 0 removed due to filtering                                         |         |   |          |              |              |            |    |       |
| IPI:IPI00903155.1 TREMBL:B3KUB9 Ta<br>19287468 - 1K.KLEEAASRAAEEEK.K                                | 1560.79 | 2 | 1<br>1   | 8.1<br>1.699 | 0.0<br>0.383 | 0<br>106.1 | 4  | 9/39  |
| 1 of 1 peptide matches reported, 0 removed due to filtering                                         |         |   |          |              |              |            |    |       |
| IPI:IPI00022963.3 SWISS-PROT:O95926 TREMBL:B2RBX8;B4E0Y8 ENSEM<br>2118291816 -K.PDMETYERLREK.H      | 1566.76 | 3 | 1<br>0.5 | 8.1<br>1.657 | 0.0<br>0.583 | 0<br>147.7 | 12 | 14/66 |
| 1 of 1 peptide matches reported, 0 removed due to filtering                                         |         |   |          |              |              |            |    |       |
| IPI:IPI00410388.1 ENSEMBL:ENSP0000<br>2118291816 -K.PDMETYERLREK.H                                  | 1566.76 | 3 | 1<br>0.5 | 8.1<br>1.657 | 0.0<br>0.583 | 0<br>147.7 | 12 | 14/66 |
| 1 of 1 peptide matches reported, 0 removed due to filtering                                         |         |   |          |              |              |            |    |       |
| IPI:IPI00929282.1 H-INV:HIT000046184 Tax_Id=9606 Gene_Symbol=N<br>19287468 - 1R.HLLATCDLGR.S        | 1156.58 | 2 | 1<br>0.6 | 8.1<br>1.635 | 0.0<br>0.619 | 0<br>232.9 | 3  | 11/27 |
| 1 of 1 peptide matches reported, 0 removed due to filtering                                         |         |   |          |              |              |            |    |       |
| IPI:IPI00937649.1 REFSEQ:XP_002343712 Tax_Id=9606 Gene_Symbol=<br>19287468 - 1R.GSQATARSSPSR.A      | 1220.60 | 2 | 1<br>0.6 | 8.1<br>1.630 | 0.0<br>0.445 | 0<br>83.5  | 9  | 8/33  |
| 1 of 1 peptide matches reported, 0 removed due to filtering                                         |         |   |          |              |              |            |    |       |
| IPI:IPI00016604.1 SWISS-PROT:Q07343-1 TREMBL:Q5TEK6 ENSEMBL:EN<br>19682592 - 2R.VNPQEESYQK.L        | 1221.57 | 2 | 1<br>0.8 | 8.1<br>1.486 | 0.0<br>0.615 | 0<br>103.8 | 3  | 9/27  |
| 1 of 1 peptide matches reported, 0 removed due to filtering                                         |         |   |          |              |              |            |    |       |
| IPI:IPI00220621.1 SWISS-PROT:Q0734<br>19682592 - 2R.VNPQEESYQK.L                                    | 1221.57 | 2 | 1<br>0.8 | 8.1<br>1.486 | 0.0<br>0.615 | 0<br>103.8 | 3  | 9/27  |
| 1 of 1 peptide matches reported, 0 removed due to filtering                                         |         |   |          |              |              |            |    |       |
| IPI:IPI00329088.4 SWISS-PROT:Q86WJ1-1 ENSEMBL:ENSP00000358262 <br>19287468 - 1K.AILM*KDLDAFENETAK.K | 1824.90 | 2 | 1<br>0.6 | 8.1<br>1.353 | 0.0<br>0.548 | 0<br>73.7  | 15 | 7/45  |
| 1 of 1 peptide matches reported, 0 removed due to filtering                                         |         |   |          |              |              |            |    |       |

---

|                                                                                                 |         |   |          |              |              |            |    |      |
|-------------------------------------------------------------------------------------------------|---------|---|----------|--------------|--------------|------------|----|------|
| IPI:IPI00400835.6 TREMBL:B5MDZ7 EN<br>19287468 - 1K.AILM*KDLDAFENETAK.K                         | 1824.90 | 2 | 1<br>0.6 | 8.1<br>1.353 | 0.0<br>0.548 | 0<br>73.7  | 15 | 7/45 |
| 1 of 1 peptide matches reported, 0 removed due to filtering                                     |         |   |          |              |              |            |    |      |
| IPI:IPI00854584.1 SWISS-PROT:Q86WJ<br>19287468 - 1K.AILM*KDLDAFENETAK.K                         | 1824.90 | 2 | 1<br>0.6 | 8.1<br>1.353 | 0.0<br>0.548 | 0<br>73.7  | 15 | 7/45 |
| 1 of 1 peptide matches reported, 0 removed due to filtering                                     |         |   |          |              |              |            |    |      |
| IPI:IPI00890729.1 SWISS-PROT:Q86WJ<br>19287468 - 1K.AILM*KDLDAFENETAK.K                         | 1824.90 | 2 | 1<br>0.6 | 8.1<br>1.353 | 0.0<br>0.548 | 0<br>73.7  | 15 | 7/45 |
| 1 of 1 peptide matches reported, 0 removed due to filtering                                     |         |   |          |              |              |            |    |      |
| IPI:IPI00890749.1 SWISS-PROT:Q86WJ<br>19287468 - 1K.AILM*KDLDAFENETAK.K                         | 1824.90 | 2 | 1<br>0.6 | 8.1<br>1.353 | 0.0<br>0.548 | 0<br>73.7  | 15 | 7/45 |
| 1 of 1 peptide matches reported, 0 removed due to filtering                                     |         |   |          |              |              |            |    |      |
| IPI:IPI00909123.1 TREMBL:B4DPN5 Ta<br>19287468 - 1K.AILM*KDLDAFENETAK.K                         | 1824.90 | 2 | 1<br>0.6 | 8.1<br>1.353 | 0.0<br>0.548 | 0<br>73.7  | 15 | 7/45 |
| 1 of 1 peptide matches reported, 0 removed due to filtering                                     |         |   |          |              |              |            |    |      |
| IPI:IPI00007775.1 SWISS-PROT:Q9UKT6 TREMBL:Q3KPF8 ENSEMBL:ENSP<br>19287468 - 1K.CEVSCSAFIRFVR.L | 1632.75 | 2 | 1<br>1   | 8.1<br>1.324 | 0.0<br>0.637 | 0<br>67.0  | 3  | 6/36 |
| 1 of 1 peptide matches reported, 0 removed due to filtering                                     |         |   |          |              |              |            |    |      |
| IPI:IPI00003519.1 SWISS-PROT:Q15029 TREMBL:A8KAP3;B3KX19;B4DMC<br>2118291816 -K.RLWGDIYFNPK.T   | 1408.74 | 2 | 1<br>0.6 | 8.1<br>1.270 | 0.0<br>0.699 | 0<br>132.3 | 2  | 8/30 |
| 1 of 1 peptide matches reported, 0 removed due to filtering                                     |         |   |          |              |              |            |    |      |
| IPI:IPI00903143.1 TREMBL:B3KQY2 Ta<br>2118291816 -K.RLWGDIYFNPK.T                               | 1408.74 | 2 | 1<br>0.6 | 8.1<br>1.270 | 0.0<br>0.699 | 0<br>132.3 | 2  | 8/30 |
| 1 of 1 peptide matches reported, 0 removed due to filtering                                     |         |   |          |              |              |            |    |      |
| IPI:IPI00917777.1 TREMBL:B4DK30;B4<br>2118291816 -K.RLWGDIYFNPK.T                               | 1408.74 | 2 | 1<br>0.6 | 8.1<br>1.270 | 0.0<br>0.699 | 0<br>132.3 | 2  | 8/30 |
| 1 of 1 peptide matches reported, 0 removed due to filtering                                     |         |   |          |              |              |            |    |      |
| IPI:IPI00028954.1 SWISS-PROT:O60318 TREMBL:B3KT88;B3KWZ4;B3KXE<br>19287468 - 1R.TYCRWKS.S       | 1129.55 | 2 | 1<br>0.9 | 8.1<br>1.258 | 0.0<br>0.606 | 0<br>56.9  | 5  | 5/21 |
| 1 of 1 peptide matches reported, 0 removed due to filtering                                     |         |   |          |              |              |            |    |      |

---

---

Database... 070909ipihUMANv361Processed.fasta

Filter(s)... None

Mods: (M\* +15.99492) C=161.01468

| Reference         |                                              |         |   | P      | Score | Coverage | Accession |     |       |       |
|-------------------|----------------------------------------------|---------|---|--------|-------|----------|-----------|-----|-------|-------|
| Scan(s)           | Sequence                                     | MH+     | z | P      | XC    | DeltaCn  | Sp        | RSp | Ions  | Count |
| IPI:IPI00022463.1 | SWISS-PROT:P02787 TREMBL:A0PJA6;B4DEX9;B4DHZ |         |   | 1e-007 | 22.2  | 0.0      | 0         |     |       |       |
| 19287468 - 1      | R.WCAVSEHEATK.C                              | 1318.57 | 2 | 1e-007 | 4.487 | 0.529    | 1202.0    | 1   | 20/30 | 2     |
| 19287468 - 1      | K.SKEFQLFSSPHGK.D                            | 1491.76 | 3 | 8e-007 | 4.643 | 0.609    | 849.7     | 1   | 27/72 | 3     |
| 19287468 - 1      | K.KASYLDCIR.A                                | 1126.56 | 2 | 0.06   | 1.175 | 0.496    | 163.9     | 4   | 10/24 | 1     |

3 of 3 peptide matches reported, 0 removed due to filtering

DTA for scans: 19287468-1  
Precursor ion: 659.79  
Mass type: mono  
Mod's: (M\* +15.99492) C=161.01468

Ion series for charge: +1

| AA | A ions        | B ions         | B* ions | Bo ions | C ions | Y ions         | Y* ions | Yo ions | Z ions |
|----|---------------|----------------|---------|---------|--------|----------------|---------|---------|--------|
| W  | 159.09        | <b>187.09</b>  |         |         |        |                |         |         |        |
| C  | <b>320.11</b> | <b>348.10</b>  |         |         |        | <b>1132.49</b> |         |         |        |
| A  | 391.14        | <b>419.14</b>  |         |         |        | <b>971.48</b>  |         |         |        |
| V  | <b>490.21</b> | <b>518.21</b>  |         |         |        | <b>900.44</b>  |         |         |        |
| S  | 577.24        | <b>605.24</b>  |         |         |        | <b>801.37</b>  |         |         |        |
| E  | 706.29        | 734.28         |         |         |        | <b>714.34</b>  |         |         |        |
| H  | <b>843.35</b> | <b>871.34</b>  |         |         |        | <b>585.30</b>  |         |         |        |
| E  | <b>972.39</b> | <b>1000.38</b> |         |         |        | <b>448.24</b>  |         |         |        |
| A  | 1043.43       | <b>1071.42</b> |         |         |        | <b>319.20</b>  |         |         |        |
| T  | 1144.47       | <b>1172.47</b> |         |         |        | <b>248.16</b>  |         |         |        |
| K  |               |                |         |         |        | 147.11         |         |         |        |

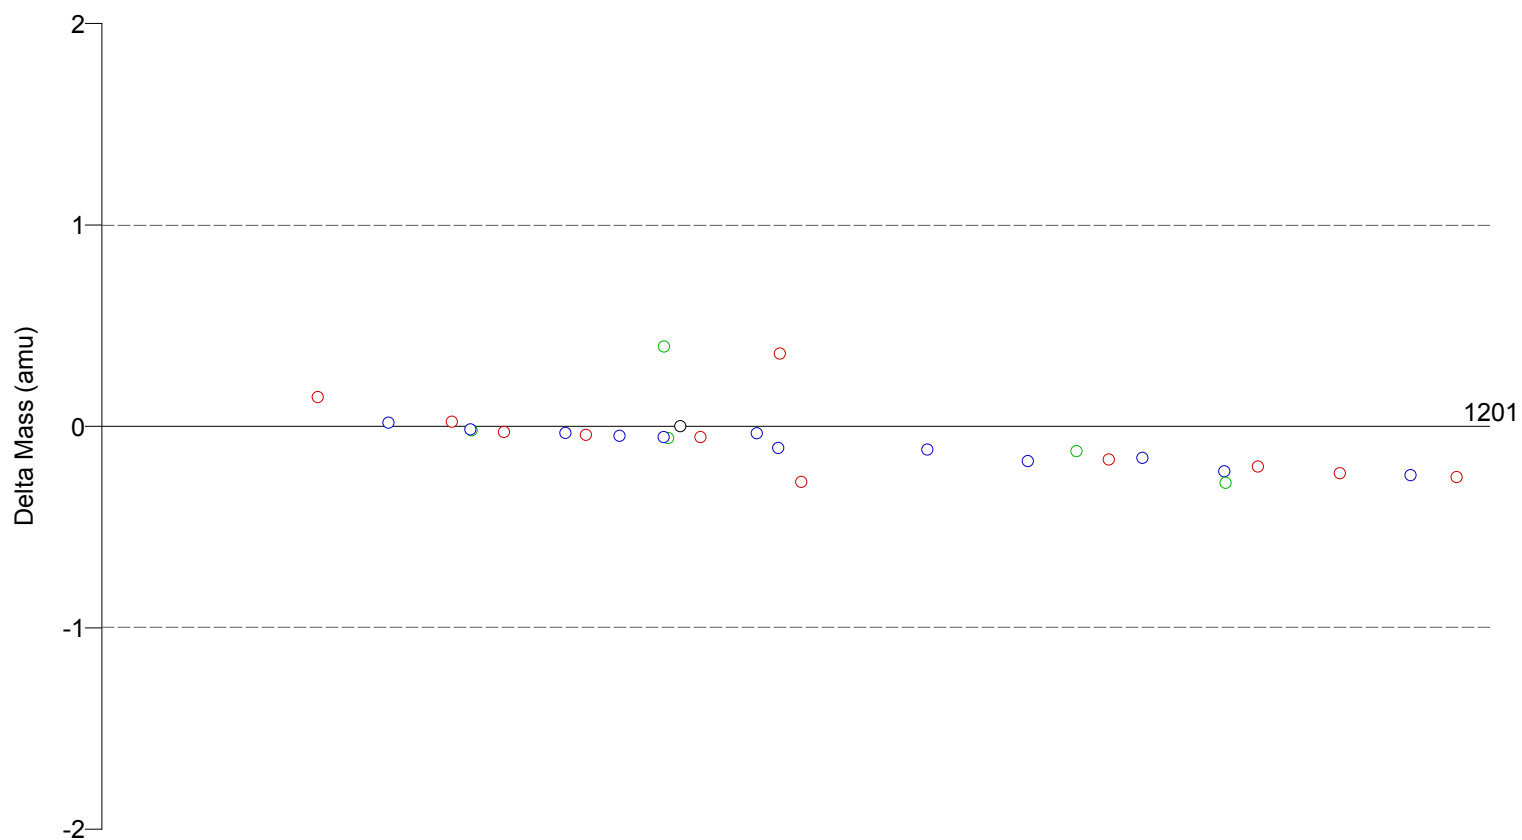

#19287468-1 NL: 2.05E5

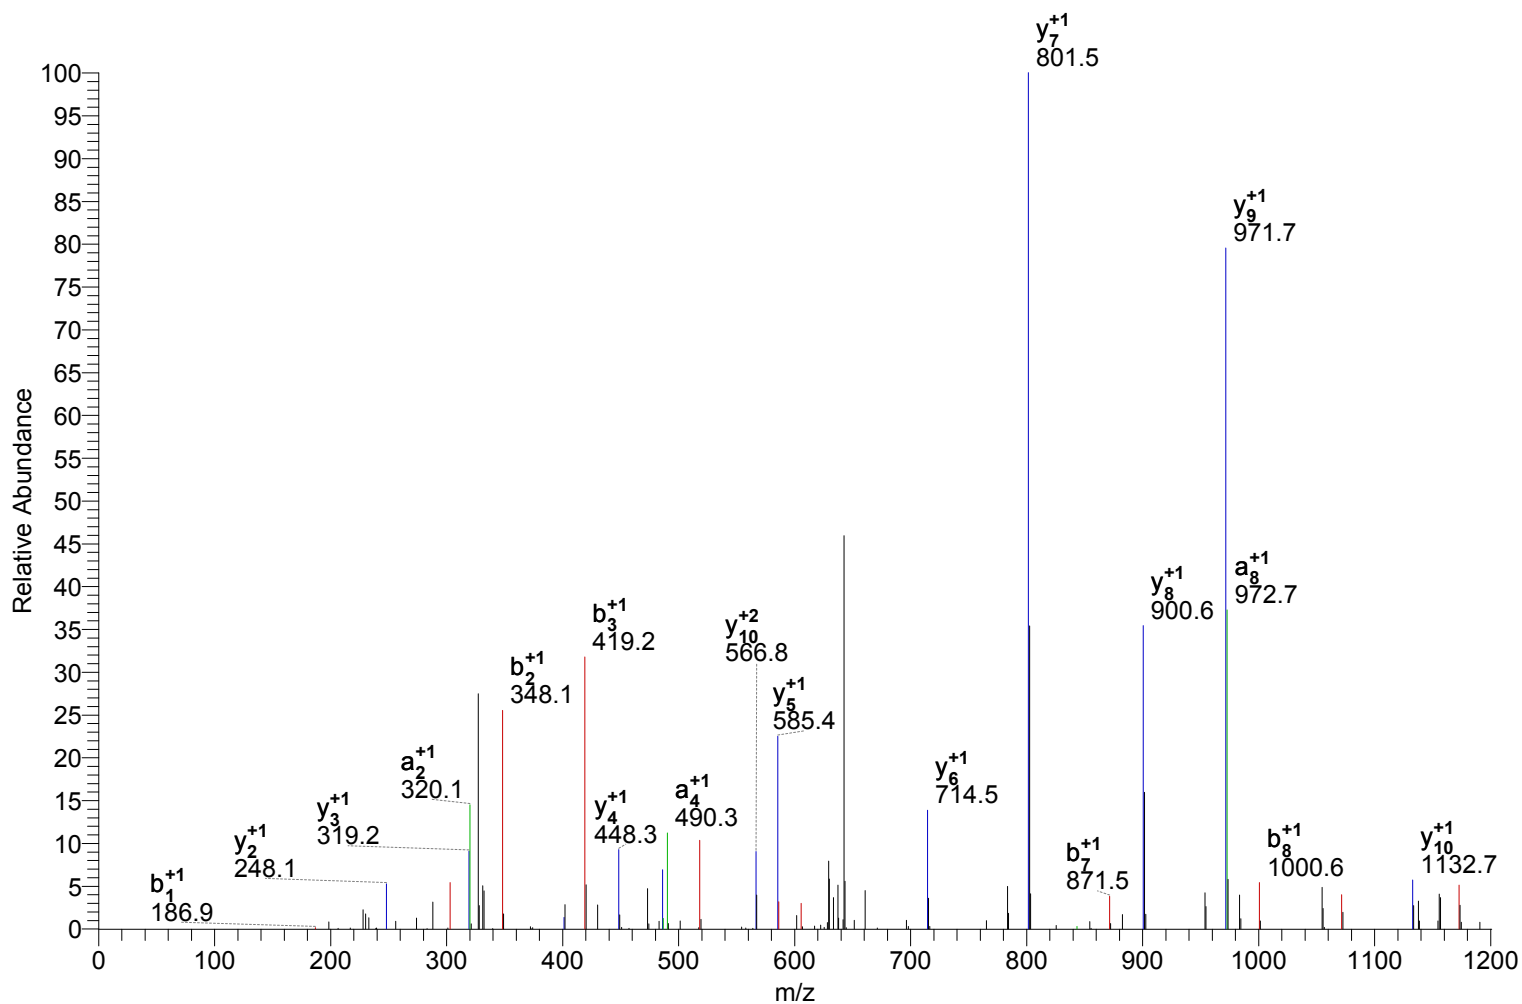



DTA for scans: 19287468-1  
Precursor ion: 497.93  
Mass type: mono  
Mod's: (M\* +15.99492) C=161.01468

Ion series for charge: +1

| AA | A ions  | B ions        | B* ions | Bo ions | C ions | Y ions         | Y* ions | Yo ions | Z ions |
|----|---------|---------------|---------|---------|--------|----------------|---------|---------|--------|
| S  | 60.04   | 88.04         |         |         |        |                |         |         |        |
| K  | 188.14  | <b>216.13</b> |         |         |        | 1404.73        |         |         |        |
| E  | 317.18  | <b>345.18</b> |         |         |        | 1276.63        |         |         |        |
| F  | 464.25  | 492.25        |         |         |        | 1147.59        |         |         |        |
| Q  | 592.31  | <b>620.30</b> |         |         |        | <b>1000.52</b> |         |         |        |
| L  | 705.39  | <b>733.39</b> |         |         |        | <b>872.46</b>  |         |         |        |
| F  | 852.46  | <b>880.46</b> |         |         |        | <b>759.38</b>  |         |         |        |
| S  | 939.49  | 967.49        |         |         |        | <b>612.31</b>  |         |         |        |
| S  | 1026.53 | 1054.52       |         |         |        | <b>525.28</b>  |         |         |        |
| P  | 1123.58 | 1151.57       |         |         |        | <b>438.25</b>  |         |         |        |
| H  | 1260.64 | 1288.63       |         |         |        | <b>341.19</b>  |         |         |        |
| G  | 1317.66 | 1345.65       |         |         |        | <b>204.13</b>  |         |         |        |
| K  |         |               |         |         |        | 147.11         |         |         |        |

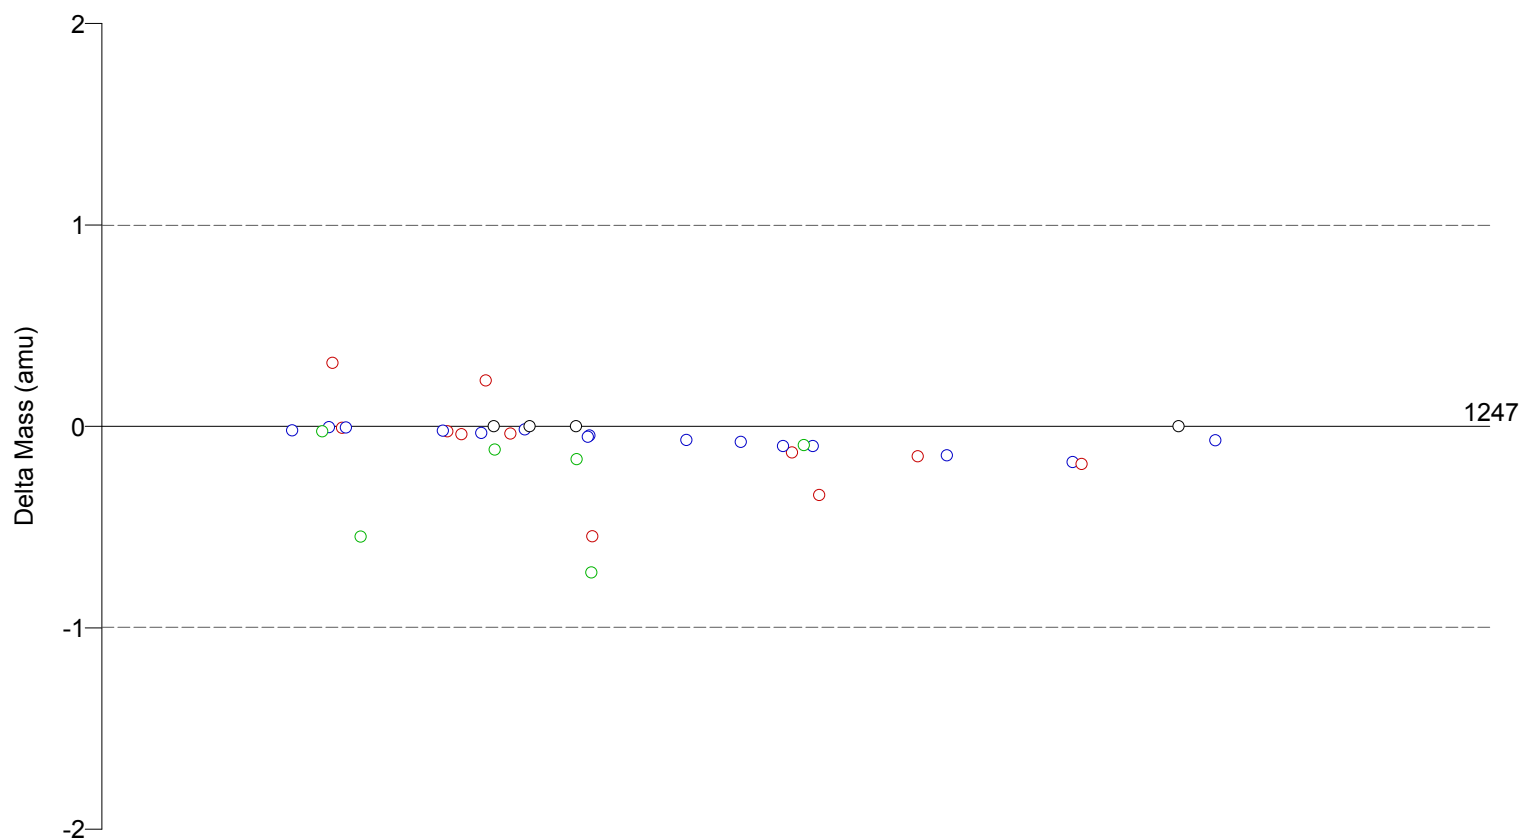

#19287468-1 NL: 3.10E6

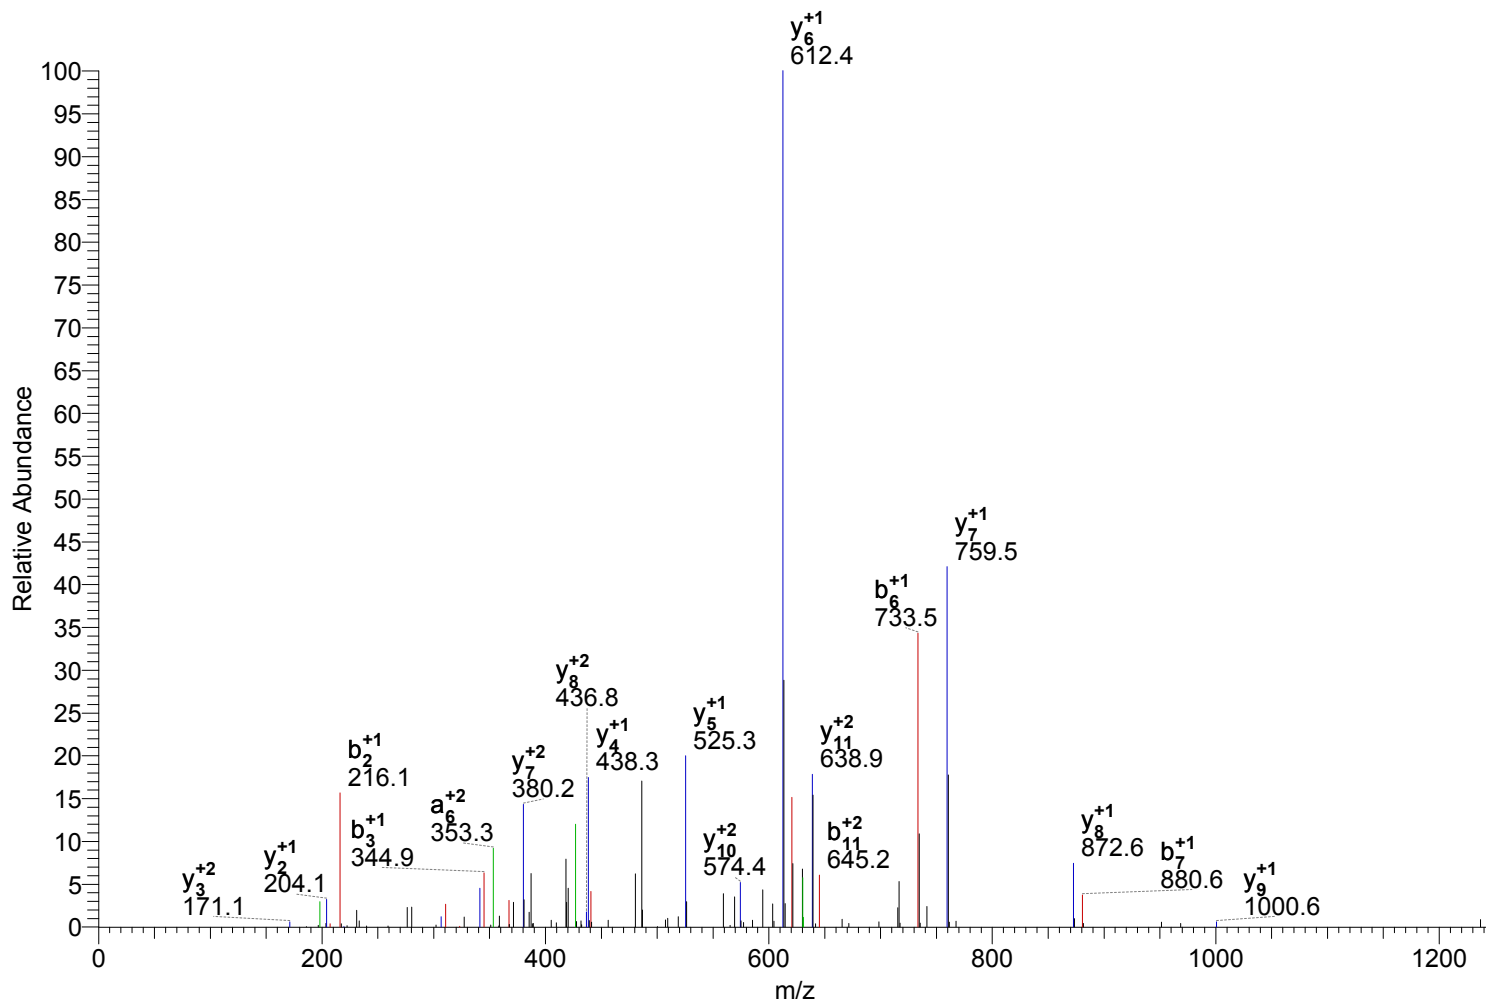

DTA for scans: 19287468-1  
Precursor ion: 563.79  
Mass type: mono  
Mod's: (M\* +15.99492) C=161.01468

Ion series for charge: +1

| AA | A ions | B ions        | B* ions | Bo ions | C ions | Y ions        | Y* ions | Yo ions | Z ions |
|----|--------|---------------|---------|---------|--------|---------------|---------|---------|--------|
| K  | 101.11 | 129.10        |         |         |        |               |         |         |        |
| A  | 172.14 | 200.14        |         |         |        | <b>998.46</b> |         |         |        |
| S  | 259.18 | 287.17        |         |         |        | <b>927.42</b> |         |         |        |
| Y  | 422.24 | <b>450.23</b> |         |         |        | <b>840.39</b> |         |         |        |
| L  | 535.32 | 563.32        |         |         |        | <b>677.33</b> |         |         |        |
| D  | 650.35 | <b>678.35</b> |         |         |        | 564.24        |         |         |        |
| C  | 811.37 | 839.36        |         |         |        | <b>449.22</b> |         |         |        |
| I  | 924.45 | 952.44        |         |         |        | <b>288.20</b> |         |         |        |
| R  |        |               |         |         |        | <b>175.12</b> |         |         |        |

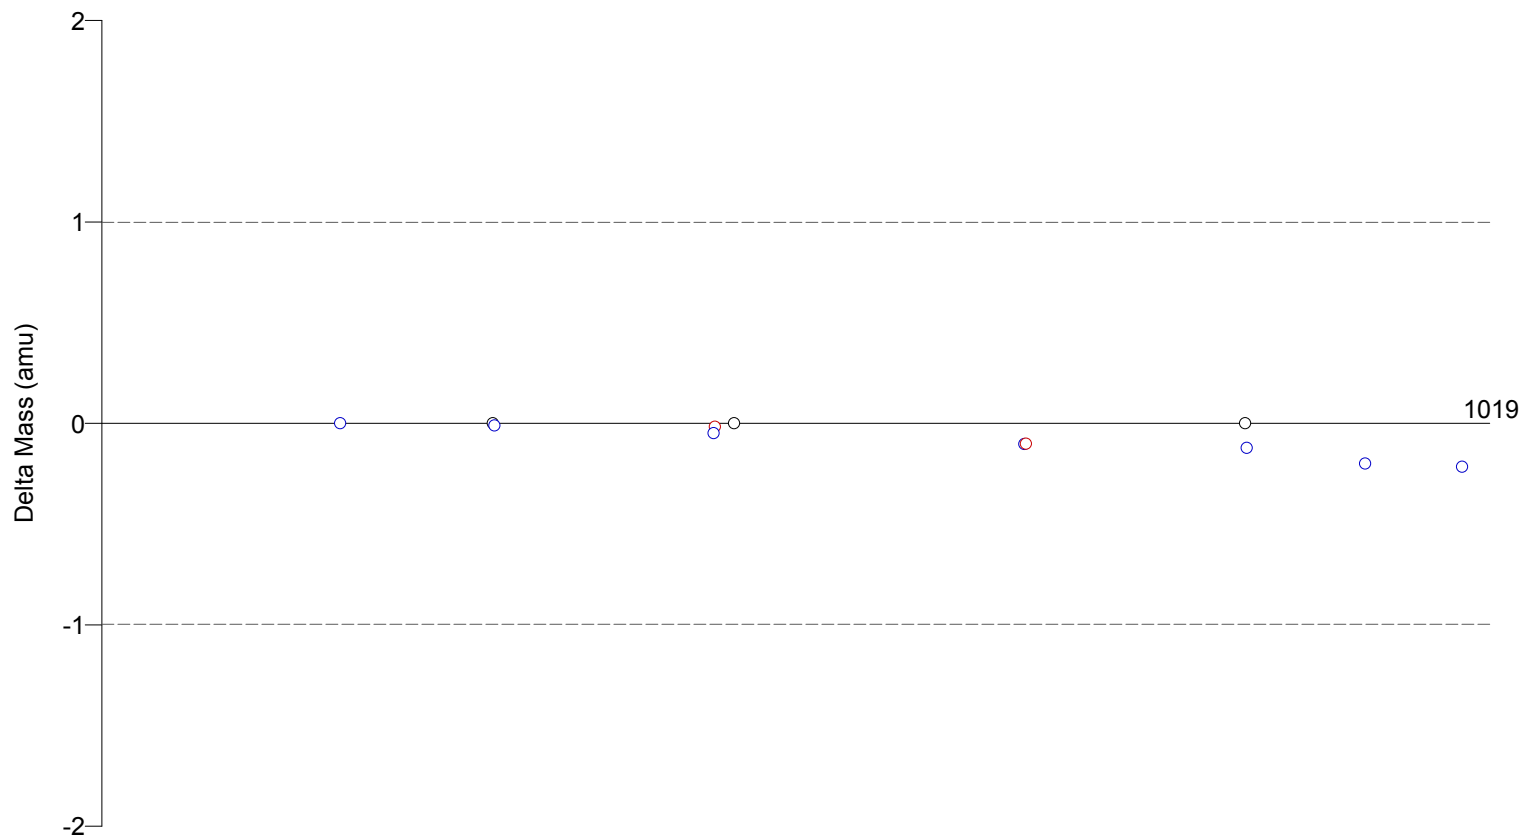

#19287468-1 NL: 7.10E5

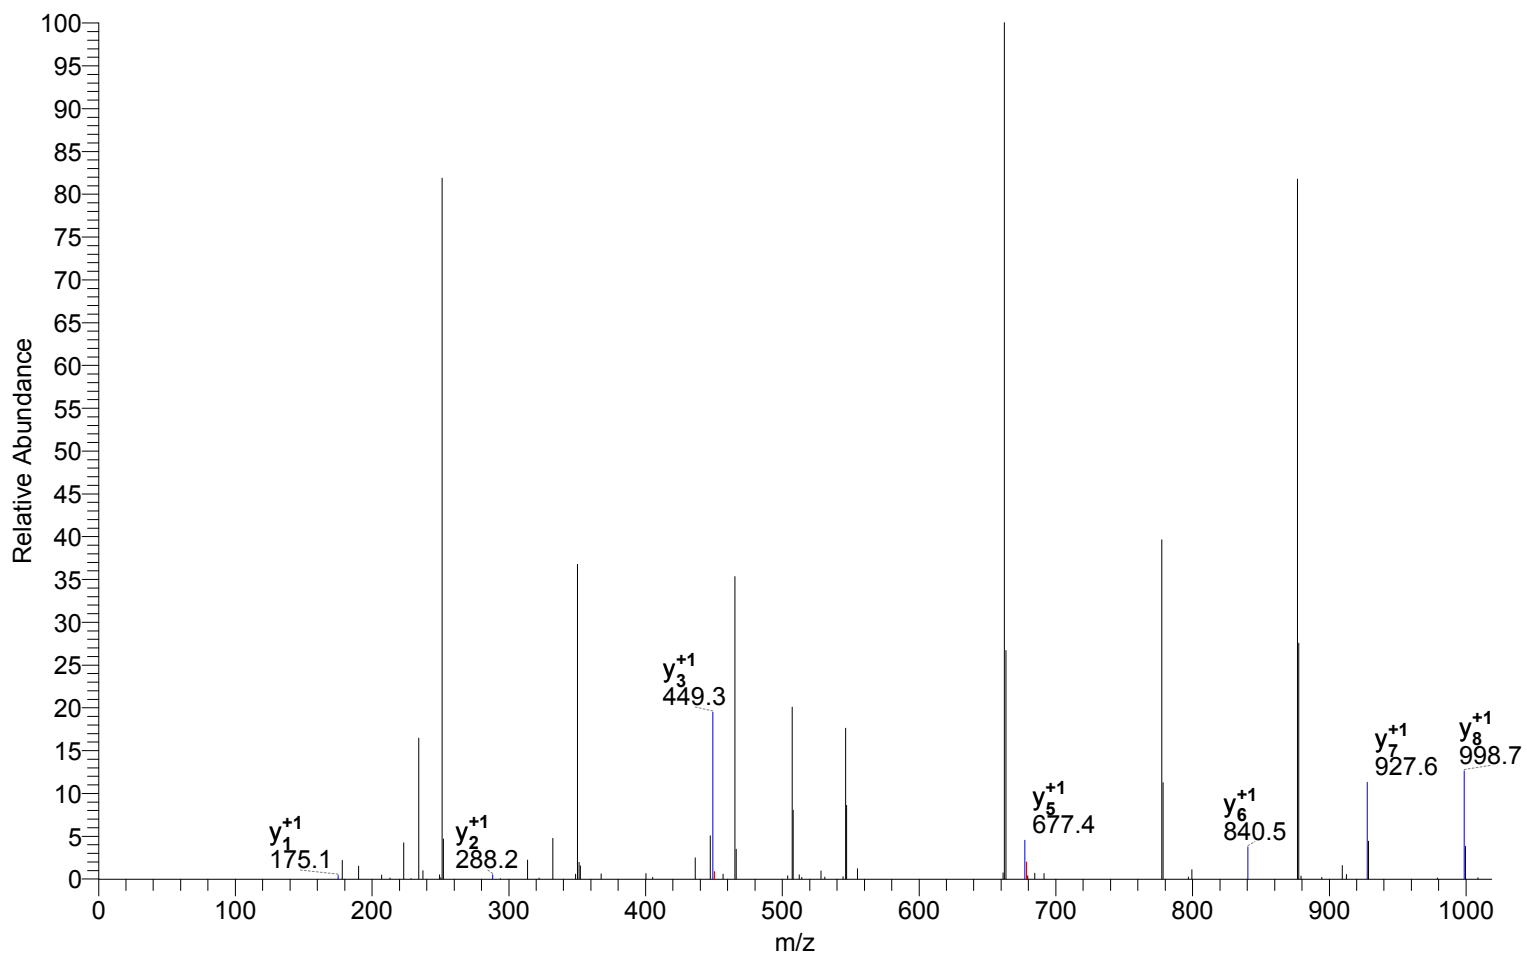

---

| Reference                          |                 |         |   | P      | Score | Coverage | Accession |     |       |       |
|------------------------------------|-----------------|---------|---|--------|-------|----------|-----------|-----|-------|-------|
| Scan(s)                            | Sequence        | MH+     | z | P      | XC    | DeltaCn  | Sp        | RSp | Ions  | Count |
| IPI:IPI00877763.1 VEGA:OTTHUMP0000 |                 |         |   | 1e-007 | 12.2  | 0.0      | 0         |     |       |       |
| 19287468 - 1                       | R.WCAVSEHEATK.C | 1318.57 | 2 | 1e-007 | 4.487 | 0.529    | 1202.0    | 1   | 20/30 | 2     |
| 19287468 - 1                       | K.KASYLDCIR.A   | 1126.56 | 2 | 0.06   | 1.175 | -        | 163.9     | 4   | 10/24 | 1     |

2 of 2 peptide matches reported, 0 removed due to filtering

DTA for scans: 19287468-1  
Precursor ion: 659.79  
Mass type: mono  
Mod's: (M\* +15.99492) C=161.01468

Ion series for charge: +1

| AA | A ions        | B ions         | B* ions | Bo ions | C ions | Y ions         | Y* ions | Yo ions | Z ions |
|----|---------------|----------------|---------|---------|--------|----------------|---------|---------|--------|
| W  | 159.09        | <b>187.09</b>  |         |         |        |                |         |         |        |
| C  | <b>320.11</b> | <b>348.10</b>  |         |         |        | <b>1132.49</b> |         |         |        |
| A  | 391.14        | <b>419.14</b>  |         |         |        | <b>971.48</b>  |         |         |        |
| V  | <b>490.21</b> | <b>518.21</b>  |         |         |        | <b>900.44</b>  |         |         |        |
| S  | 577.24        | <b>605.24</b>  |         |         |        | <b>801.37</b>  |         |         |        |
| E  | 706.29        | 734.28         |         |         |        | <b>714.34</b>  |         |         |        |
| H  | <b>843.35</b> | <b>871.34</b>  |         |         |        | <b>585.30</b>  |         |         |        |
| E  | <b>972.39</b> | <b>1000.38</b> |         |         |        | <b>448.24</b>  |         |         |        |
| A  | 1043.43       | <b>1071.42</b> |         |         |        | <b>319.20</b>  |         |         |        |
| T  | 1144.47       | <b>1172.47</b> |         |         |        | <b>248.16</b>  |         |         |        |
| K  |               |                |         |         |        | 147.11         |         |         |        |

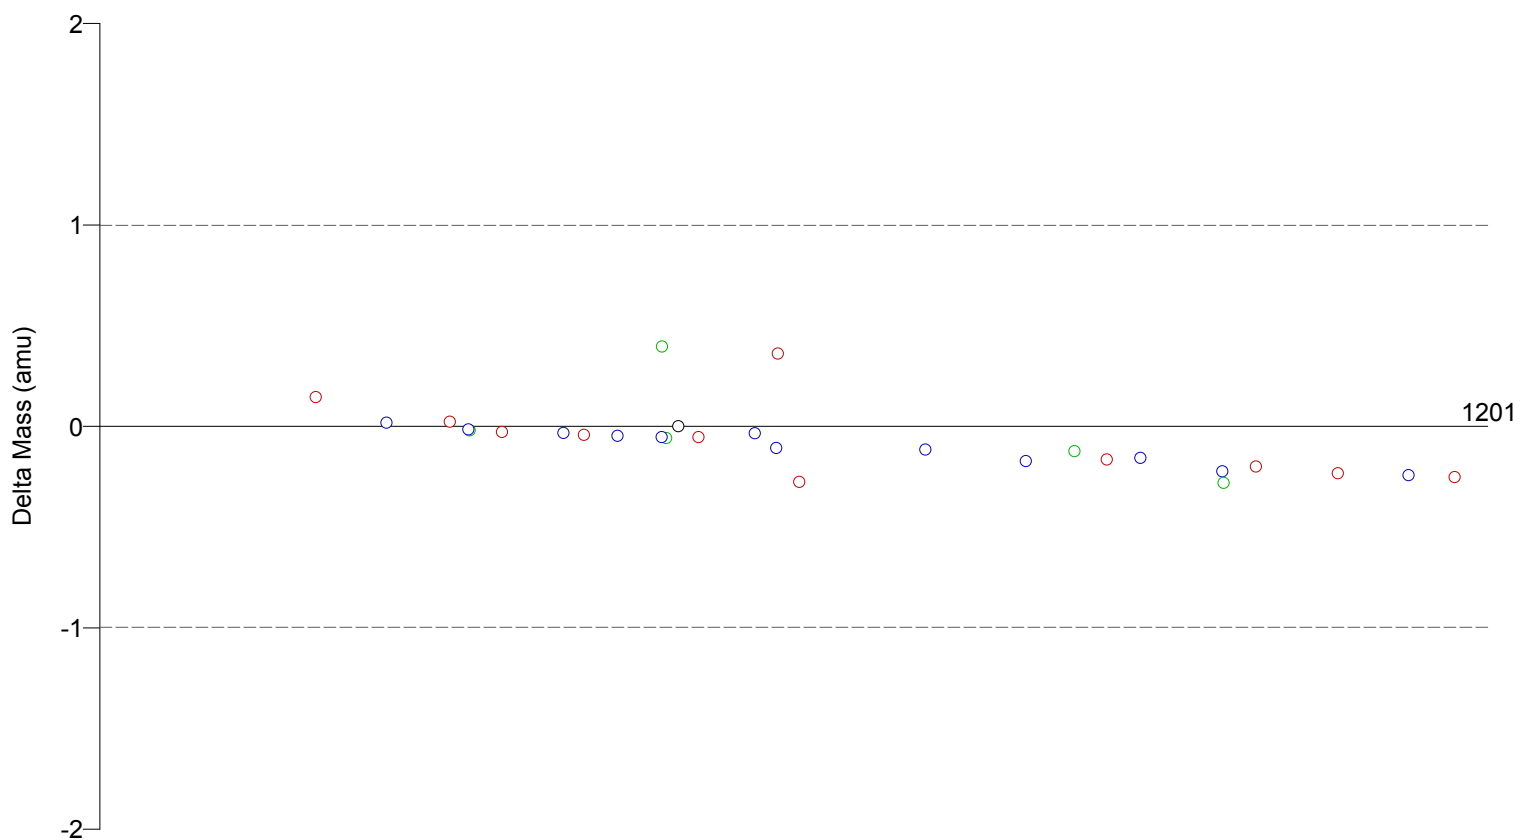

#19287468-1 NL: 2.05E5

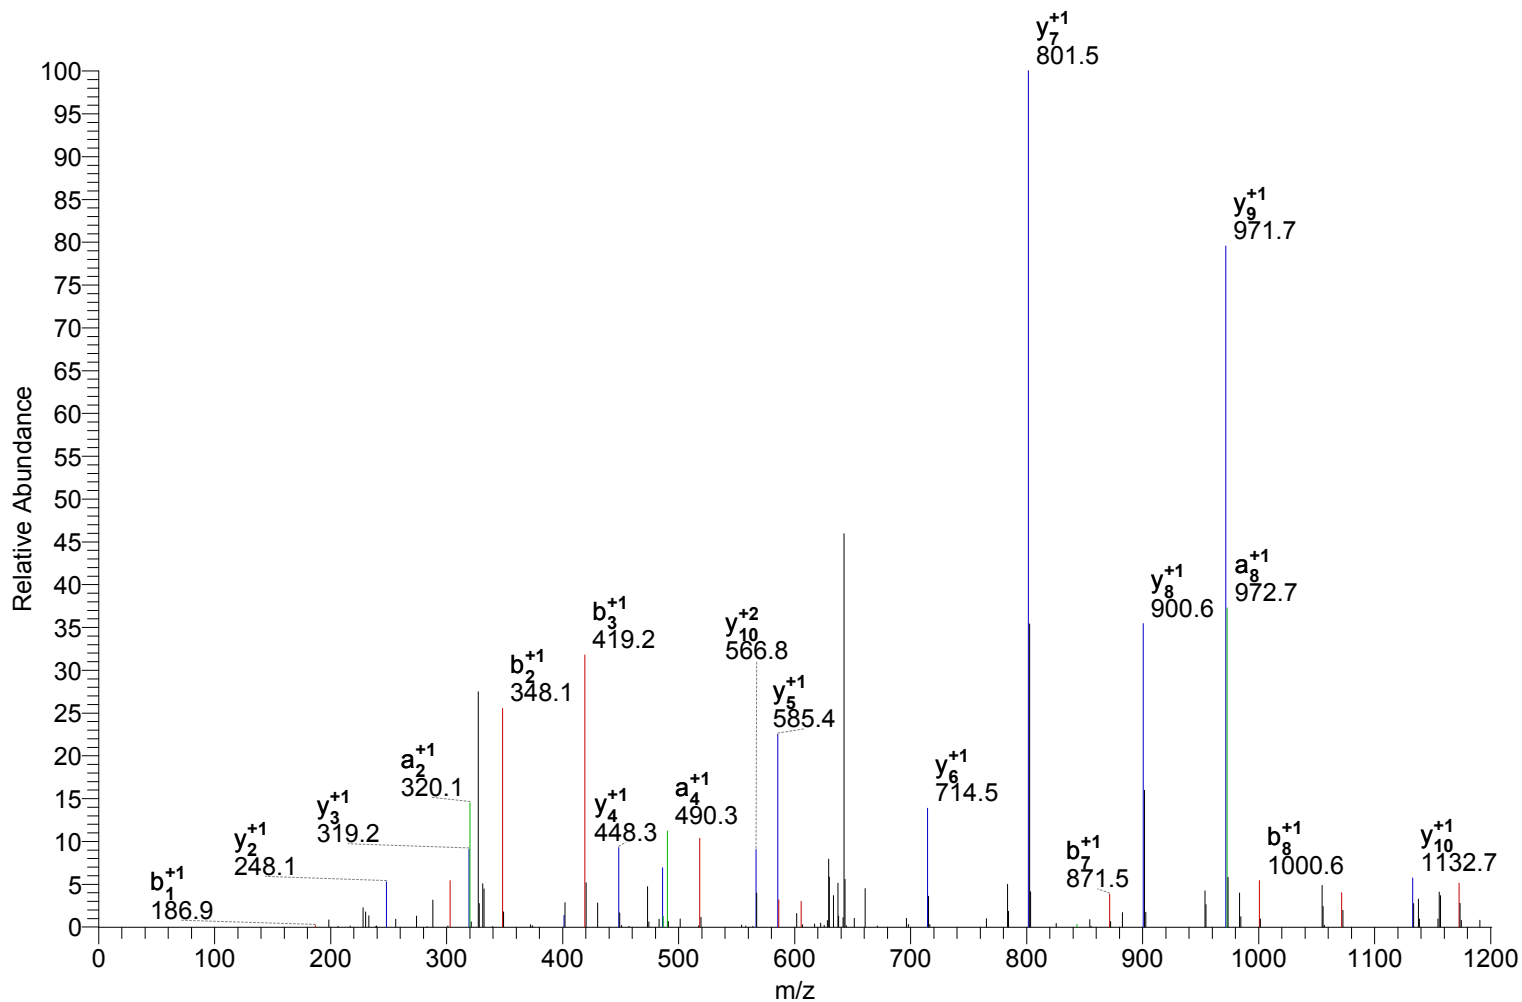

DTA for scans: 19287468-1  
Precursor ion: 563.79  
Mass type: mono  
Mod's: (M\* +15.99492) C=161.01468

Ion series for charge: +1

| AA | A ions | B ions | B* ions | Bo ions | C ions | Y ions | Y* ions | Yo ions | Z ions |
|----|--------|--------|---------|---------|--------|--------|---------|---------|--------|
| K  | 101.11 | 129.10 |         |         |        |        |         |         |        |
| A  | 172.14 | 200.14 |         |         |        | 998.46 |         |         |        |
| S  | 259.18 | 287.17 |         |         |        | 927.42 |         |         |        |
| Y  | 422.24 | 450.23 |         |         |        | 840.39 |         |         |        |
| L  | 535.32 | 563.32 |         |         |        | 677.33 |         |         |        |
| D  | 650.35 | 678.35 |         |         |        | 564.24 |         |         |        |
| C  | 811.37 | 839.36 |         |         |        | 449.22 |         |         |        |
| I  | 924.45 | 952.44 |         |         |        | 288.20 |         |         |        |
| R  |        |        |         |         |        | 175.12 |         |         |        |



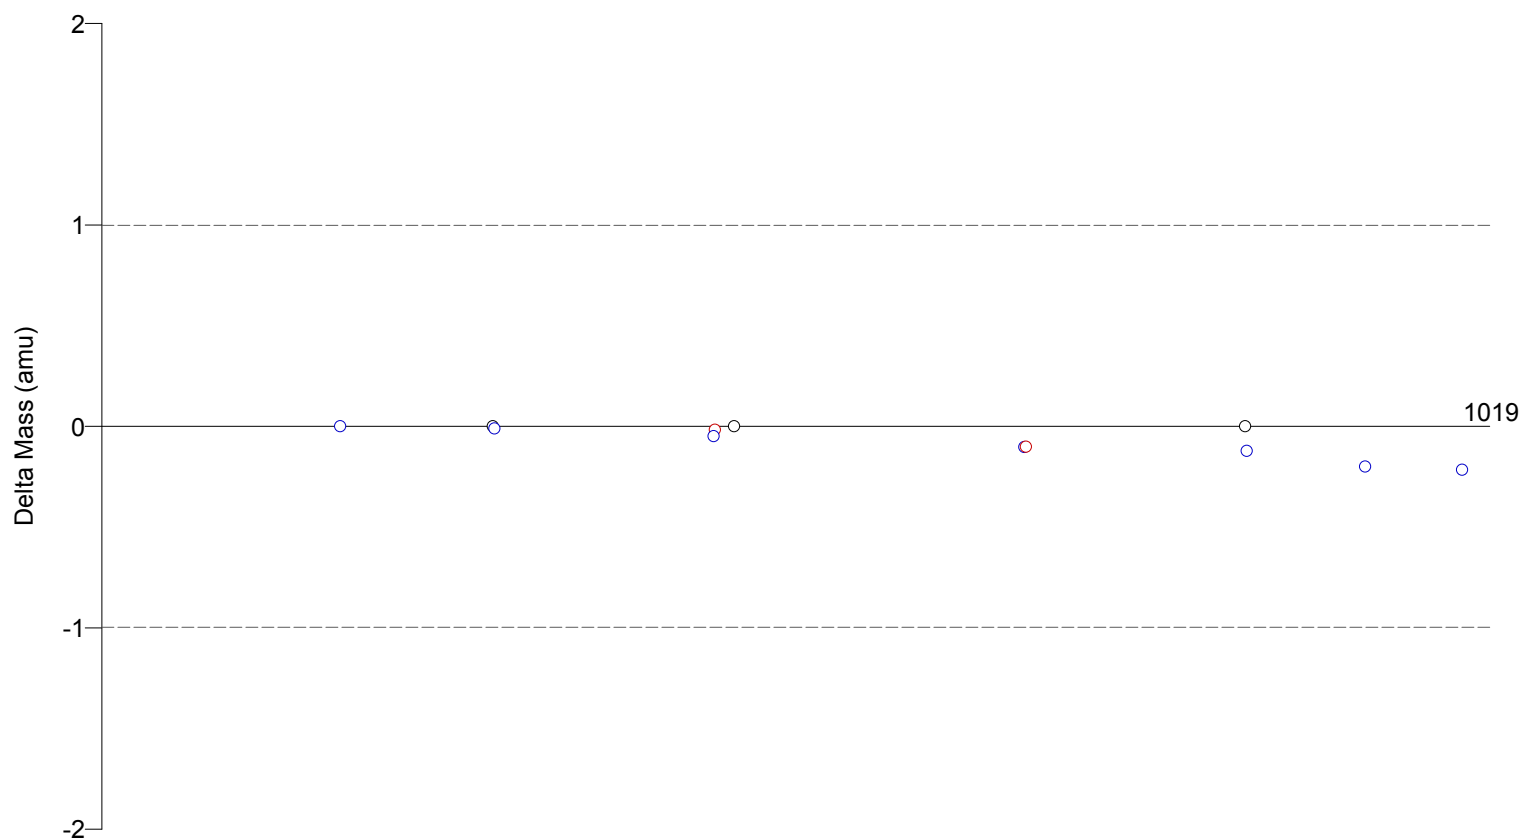

#19287468-1 NL: 7.10E5

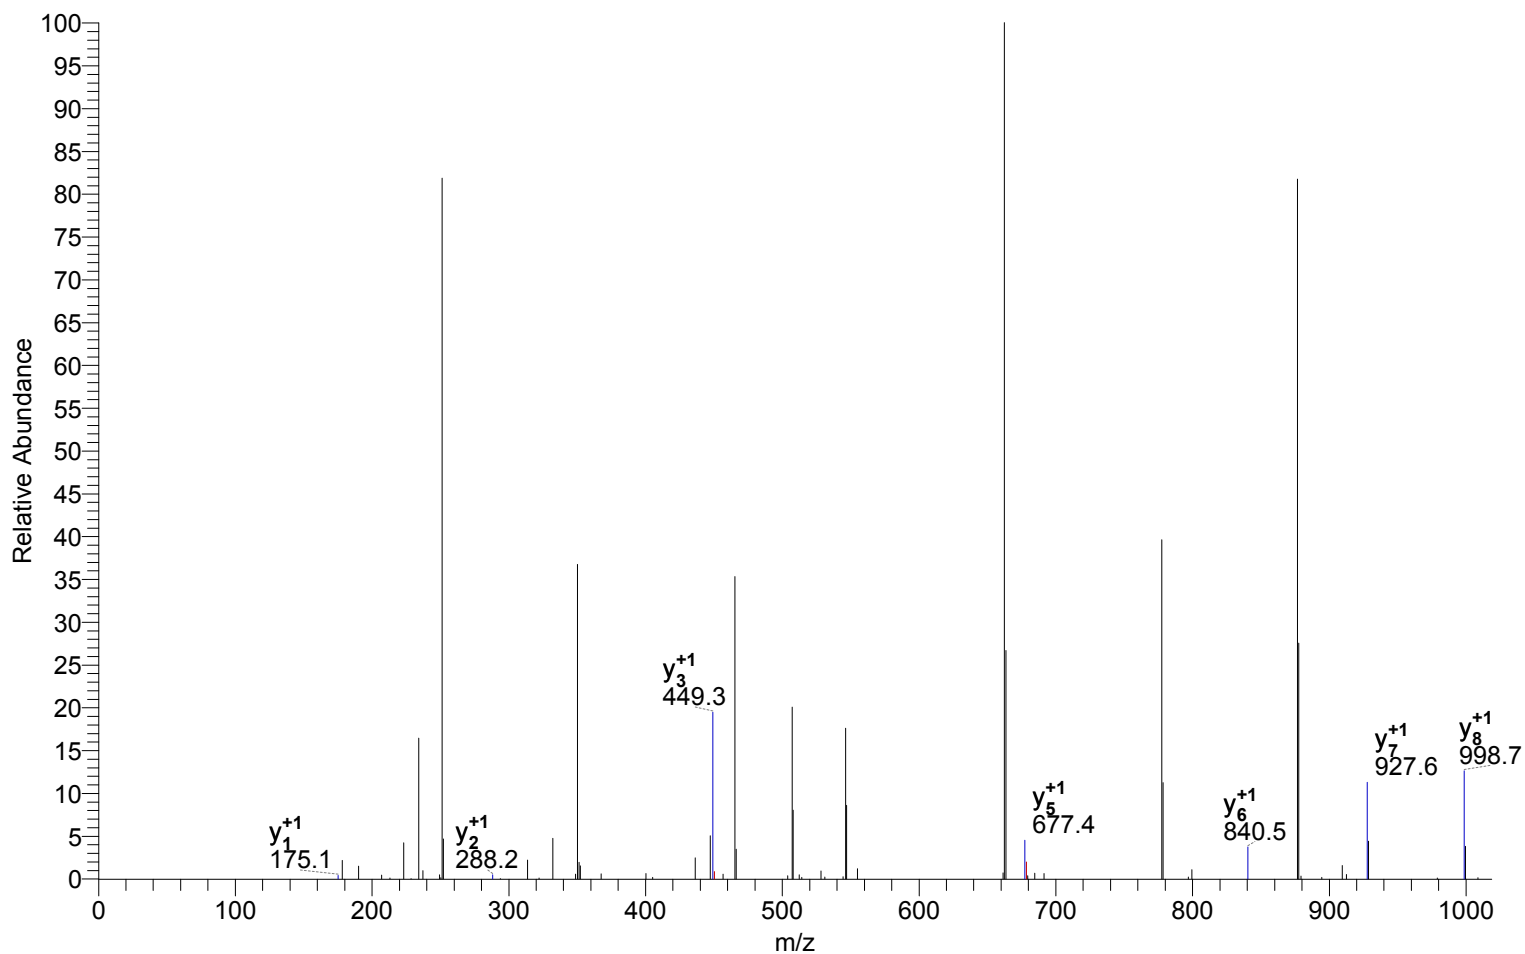

---

| Reference                          |                 |         |   | P      | Score | Coverage | Accession |     |       |       |
|------------------------------------|-----------------|---------|---|--------|-------|----------|-----------|-----|-------|-------|
| Scan(s)                            | Sequence        | MH+     | z | P      | XC    | DeltaCn  | Sp        | RSp | Ions  | Count |
| IPI:IPI00879916.1 VEGA:OTTHUMP0000 |                 |         |   | 1e-007 | 10.2  | 0.0      | 0         |     |       |       |
| 19287468 - 1                       | R.WCAVSEHEATK.C | 1318.57 | 2 | 1e-007 | 4.487 | 0.529    | 1202.0    | 1   | 20/30 | 2     |

1 of 1 peptide matches reported, 0 removed due to filtering

DTA for scans: 19287468-1  
Precursor ion: 659.79  
Mass type: mono  
Mod's: (M\* +15.99492) C=161.01468

Ion series for charge: +1

| AA | A ions        | B ions         | B* ions | Bo ions | C ions | Y ions         | Y* ions | Yo ions | Z ions |
|----|---------------|----------------|---------|---------|--------|----------------|---------|---------|--------|
| W  | 159.09        | <b>187.09</b>  |         |         |        |                |         |         |        |
| C  | <b>320.11</b> | <b>348.10</b>  |         |         |        | <b>1132.49</b> |         |         |        |
| A  | 391.14        | <b>419.14</b>  |         |         |        | <b>971.48</b>  |         |         |        |
| V  | <b>490.21</b> | <b>518.21</b>  |         |         |        | <b>900.44</b>  |         |         |        |
| S  | 577.24        | <b>605.24</b>  |         |         |        | <b>801.37</b>  |         |         |        |
| E  | 706.29        | 734.28         |         |         |        | <b>714.34</b>  |         |         |        |
| H  | <b>843.35</b> | <b>871.34</b>  |         |         |        | <b>585.30</b>  |         |         |        |
| E  | <b>972.39</b> | <b>1000.38</b> |         |         |        | <b>448.24</b>  |         |         |        |
| A  | 1043.43       | <b>1071.42</b> |         |         |        | <b>319.20</b>  |         |         |        |
| T  | 1144.47       | <b>1172.47</b> |         |         |        | <b>248.16</b>  |         |         |        |
| K  |               |                |         |         |        | 147.11         |         |         |        |



#19287468-1 NL: 2.05E5



---

| Reference                          |                   |         |   | P      | Score | Coverage | Accession |     |       |       |
|------------------------------------|-------------------|---------|---|--------|-------|----------|-----------|-----|-------|-------|
| Scan(s)                            | Sequence          | MH+     | z | P      | XC    | DeltaCn  | Sp        | RSp | Ions  | Count |
| IPI:IPI00791330.1 VEGA:OTTHUMP0000 |                   |         |   | 8e-007 | 10.2  | 0.0      | 0         |     |       |       |
| 19287468 - 1                       | K.SKEFQLFSSPHGK.D | 1491.76 | 3 | 8e-007 | 4.643 | 0.609    | 849.7     | 1   | 27/72 | 3     |

1 of 1 peptide matches reported, 0 removed due to filtering

DTA for scans: 19287468-1  
Precursor ion: 497.93  
Mass type: mono  
Mod's: (M\* +15.99492) C=161.01468

Ion series for charge: +1

| AA | A ions  | B ions        | B* ions | Bo ions | C ions | Y ions         | Y* ions | Yo ions | Z ions |
|----|---------|---------------|---------|---------|--------|----------------|---------|---------|--------|
| S  | 60.04   | 88.04         |         |         |        |                |         |         |        |
| K  | 188.14  | <b>216.13</b> |         |         |        | 1404.73        |         |         |        |
| E  | 317.18  | <b>345.18</b> |         |         |        | 1276.63        |         |         |        |
| F  | 464.25  | 492.25        |         |         |        | 1147.59        |         |         |        |
| Q  | 592.31  | <b>620.30</b> |         |         |        | <b>1000.52</b> |         |         |        |
| L  | 705.39  | <b>733.39</b> |         |         |        | <b>872.46</b>  |         |         |        |
| F  | 852.46  | <b>880.46</b> |         |         |        | <b>759.38</b>  |         |         |        |
| S  | 939.49  | 967.49        |         |         |        | <b>612.31</b>  |         |         |        |
| S  | 1026.53 | 1054.52       |         |         |        | <b>525.28</b>  |         |         |        |
| P  | 1123.58 | 1151.57       |         |         |        | <b>438.25</b>  |         |         |        |
| H  | 1260.64 | 1288.63       |         |         |        | <b>341.19</b>  |         |         |        |
| G  | 1317.66 | 1345.65       |         |         |        | <b>204.13</b>  |         |         |        |
| K  |         |               |         |         |        | 147.11         |         |         |        |



#19287468-1 NL: 3.10E6

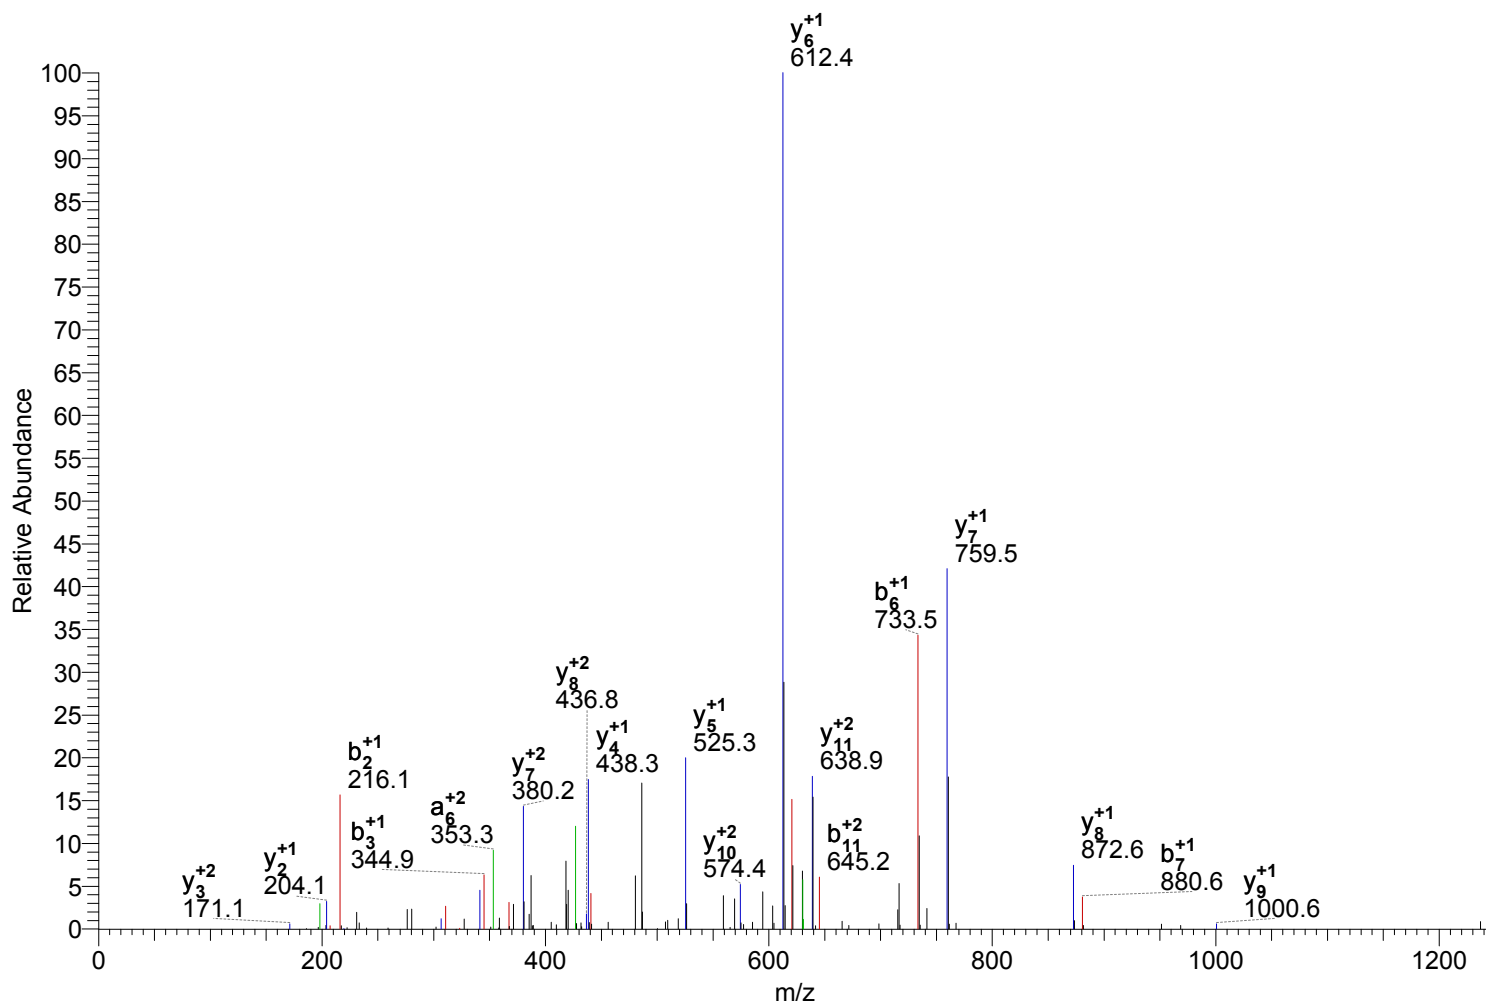

---

| Reference                          |                   |         |   | P      | Score | Coverage | Accession |     |       |       |
|------------------------------------|-------------------|---------|---|--------|-------|----------|-----------|-----|-------|-------|
| Scan(s)                            | Sequence          | MH+     | z | P      | XC    | DeltaCn  | Sp        | RSp | Ions  | Count |
| IPI:IPI00792626.1 VEGA:OTTHUMP0000 |                   |         |   | 8e-007 | 10.2  | 0.0      | 0         |     |       |       |
| 19287468 - 1                       | K.SKEFQLFSSPHGK.D | 1491.76 | 3 | 8e-007 | 4.643 | 0.609    | 849.7     | 1   | 27/72 | 3     |

1 of 1 peptide matches reported, 0 removed due to filtering



DTA for scans: 19287468-1  
Precursor ion: 497.93  
Mass type: mono  
Mod's: (M\* +15.99492) C=161.01468

Ion series for charge: +1

| AA | A ions  | B ions        | B* ions | Bo ions | C ions | Y ions         | Y* ions | Yo ions | Z ions |
|----|---------|---------------|---------|---------|--------|----------------|---------|---------|--------|
| S  | 60.04   | 88.04         |         |         |        |                |         |         |        |
| K  | 188.14  | <b>216.13</b> |         |         |        | 1404.73        |         |         |        |
| E  | 317.18  | <b>345.18</b> |         |         |        | 1276.63        |         |         |        |
| F  | 464.25  | 492.25        |         |         |        | 1147.59        |         |         |        |
| Q  | 592.31  | <b>620.30</b> |         |         |        | <b>1000.52</b> |         |         |        |
| L  | 705.39  | <b>733.39</b> |         |         |        | <b>872.46</b>  |         |         |        |
| F  | 852.46  | <b>880.46</b> |         |         |        | <b>759.38</b>  |         |         |        |
| S  | 939.49  | 967.49        |         |         |        | <b>612.31</b>  |         |         |        |
| S  | 1026.53 | 1054.52       |         |         |        | <b>525.28</b>  |         |         |        |
| P  | 1123.58 | 1151.57       |         |         |        | <b>438.25</b>  |         |         |        |
| H  | 1260.64 | 1288.63       |         |         |        | <b>341.19</b>  |         |         |        |
| G  | 1317.66 | 1345.65       |         |         |        | <b>204.13</b>  |         |         |        |
| K  |         |               |         |         |        | 147.11         |         |         |        |

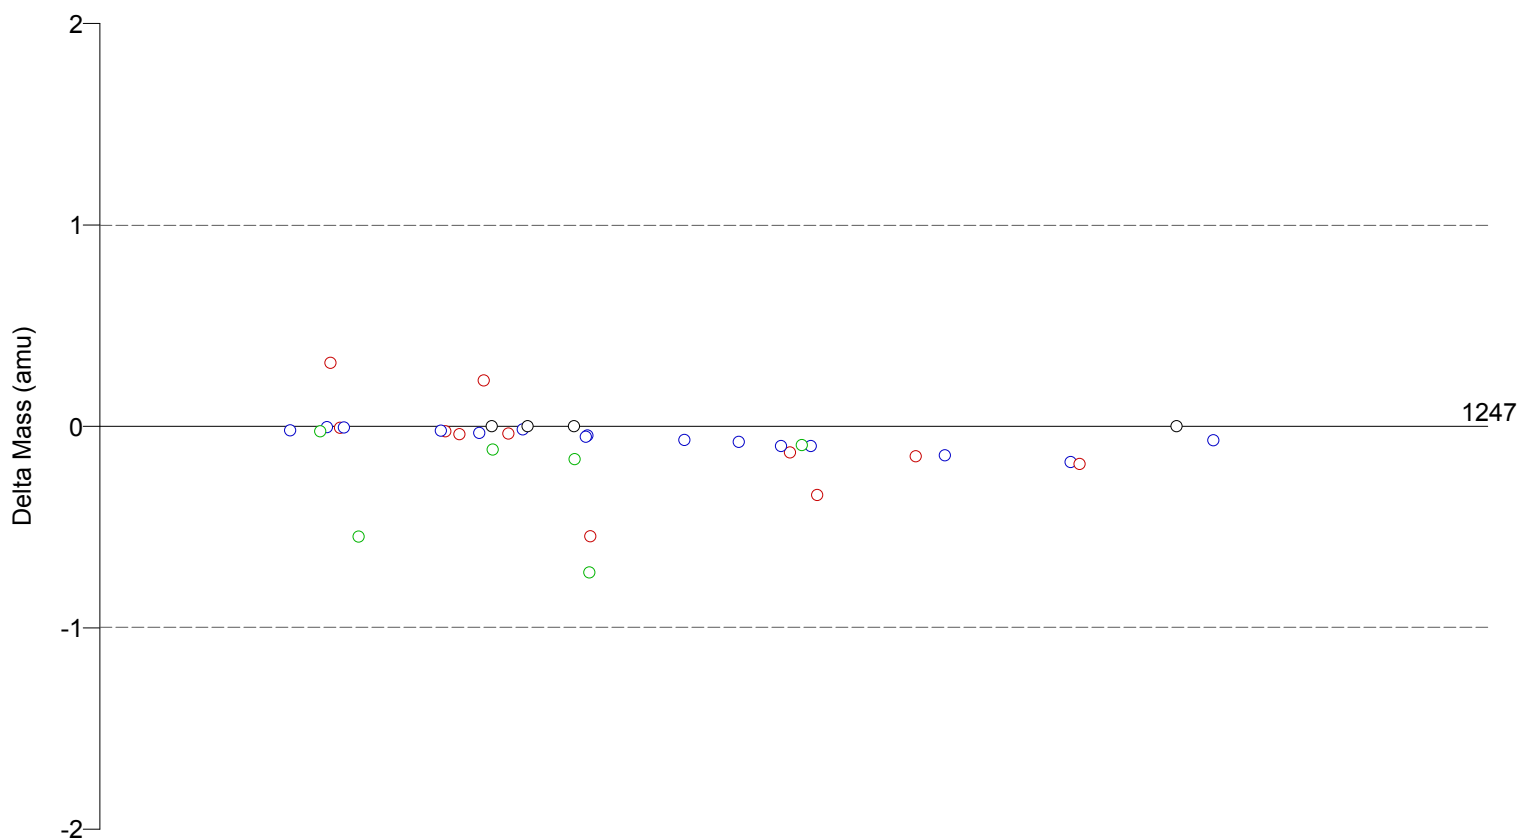

#19287468-1 NL: 3.10E6



---

| Reference                          |                   |         |   | P      | Score | Coverage | Accession |     |       |       |
|------------------------------------|-------------------|---------|---|--------|-------|----------|-----------|-----|-------|-------|
| Scan(s)                            | Sequence          | MH+     | z | P      | XC    | DeltaCn  | Sp        | RSp | Ions  | Count |
| IPI:IPI00798430.2 VEGA:OTTHUMP0000 |                   |         |   | 8e-007 | 10.2  | 0.0      | 0         |     |       |       |
| 19287468 - 1                       | K.SKEFQLFSSPHGK.D | 1491.76 | 3 | 8e-007 | 4.643 | 0.609    | 849.7     | 1   | 27/72 | 3     |

1 of 1 peptide matches reported, 0 removed due to filtering

DTA for scans: 19287468-1  
Precursor ion: 497.93  
Mass type: mono  
Mod's: (M\* +15.99492) C=161.01468

Ion series for charge: +1

| AA | A ions  | B ions        | B* ions | Bo ions | C ions | Y ions         | Y* ions | Yo ions | Z ions |
|----|---------|---------------|---------|---------|--------|----------------|---------|---------|--------|
| S  | 60.04   | 88.04         |         |         |        |                |         |         |        |
| K  | 188.14  | <b>216.13</b> |         |         |        | 1404.73        |         |         |        |
| E  | 317.18  | <b>345.18</b> |         |         |        | 1276.63        |         |         |        |
| F  | 464.25  | 492.25        |         |         |        | 1147.59        |         |         |        |
| Q  | 592.31  | <b>620.30</b> |         |         |        | <b>1000.52</b> |         |         |        |
| L  | 705.39  | <b>733.39</b> |         |         |        | <b>872.46</b>  |         |         |        |
| F  | 852.46  | <b>880.46</b> |         |         |        | <b>759.38</b>  |         |         |        |
| S  | 939.49  | 967.49        |         |         |        | <b>612.31</b>  |         |         |        |
| S  | 1026.53 | 1054.52       |         |         |        | <b>525.28</b>  |         |         |        |
| P  | 1123.58 | 1151.57       |         |         |        | <b>438.25</b>  |         |         |        |
| H  | 1260.64 | 1288.63       |         |         |        | <b>341.19</b>  |         |         |        |
| G  | 1317.66 | 1345.65       |         |         |        | <b>204.13</b>  |         |         |        |
| K  |         |               |         |         |        | 147.11         |         |         |        |



#19287468-1 NL: 3.10E6



---

| Reference                                                      |          |         |   | P      | Score | Coverage | Accession |     |       |       |  |
|----------------------------------------------------------------|----------|---------|---|--------|-------|----------|-----------|-----|-------|-------|--|
| Scan(s)                                                        | Sequence | MH+     | z | P      | XC    | DeltaCn  | Sp        | RSp | Ions  | Count |  |
| IPI:IPI00305461.3 SWISS-PROT:P19823 TREMBL:A2RTY6 ENSEMBL:ENSP |          |         |   | 1e-006 | 10.2  | 0.0      | 0         |     |       |       |  |
| 2118291816 - R.LSNENHGIAQR.I                                   |          | 1238.62 | 2 | 1e-006 | 4.292 | 0.485    | 789.7     | 1   | 18/30 | 2     |  |

1 of 1 peptide matches reported, 0 removed due to filtering

DTA for scans: 2118291816-26226248  
Precursor ion: 619.82  
Mass type: mono  
Mod's: (M\* +15.99492) C=161.01468

Ion series for charge: +1

| AA | A ions        | B ions         | B* ions | Bo ions | C ions | Y ions         | Y* ions | Yo ions | Z ions |
|----|---------------|----------------|---------|---------|--------|----------------|---------|---------|--------|
| L  | 86.10         | 114.09         |         |         |        |                |         |         |        |
| S  | <b>173.13</b> | <b>201.12</b>  |         |         |        | 1125.54        |         |         |        |
| N  | 287.17        | 315.17         |         |         |        | <b>1038.51</b> |         |         |        |
| E  | 416.21        | <b>444.21</b>  |         |         |        | <b>924.46</b>  |         |         |        |
| N  | 530.26        | <b>558.25</b>  |         |         |        | <b>795.42</b>  |         |         |        |
| H  | <b>667.32</b> | <b>695.31</b>  |         |         |        | <b>681.38</b>  |         |         |        |
| G  | 724.34        | <b>752.33</b>  |         |         |        | <b>544.32</b>  |         |         |        |
| I  | <b>837.42</b> | <b>865.42</b>  |         |         |        | <b>487.30</b>  |         |         |        |
| A  | 908.46        | <b>936.45</b>  |         |         |        | <b>374.21</b>  |         |         |        |
| Q  | 1036.52       | <b>1064.51</b> |         |         |        | <b>303.18</b>  |         |         |        |
| R  |               |                |         |         |        | <b>175.12</b>  |         |         |        |

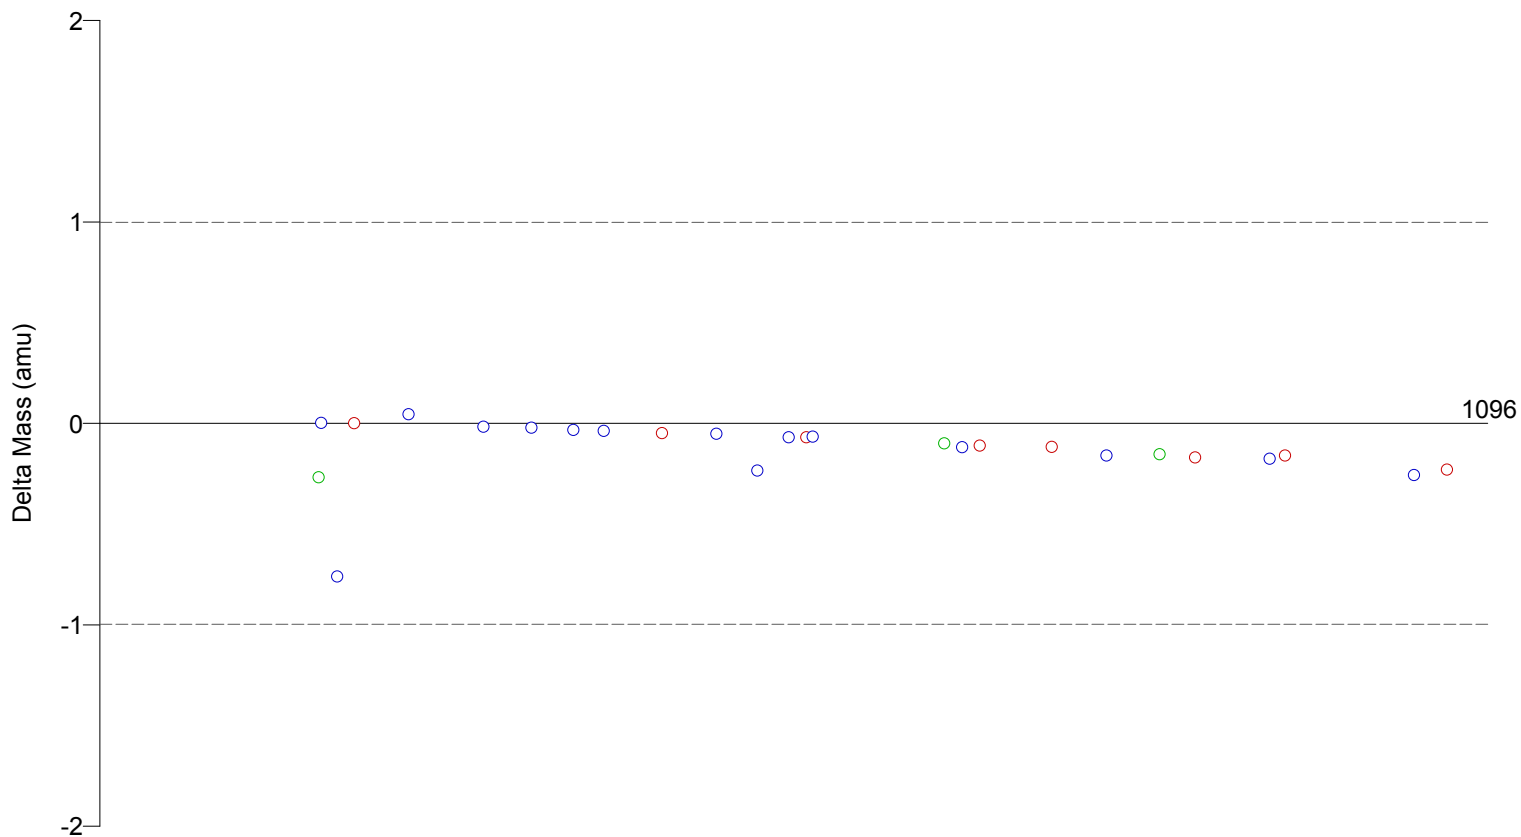

#2118291816-26226248 NL: 2.79E5

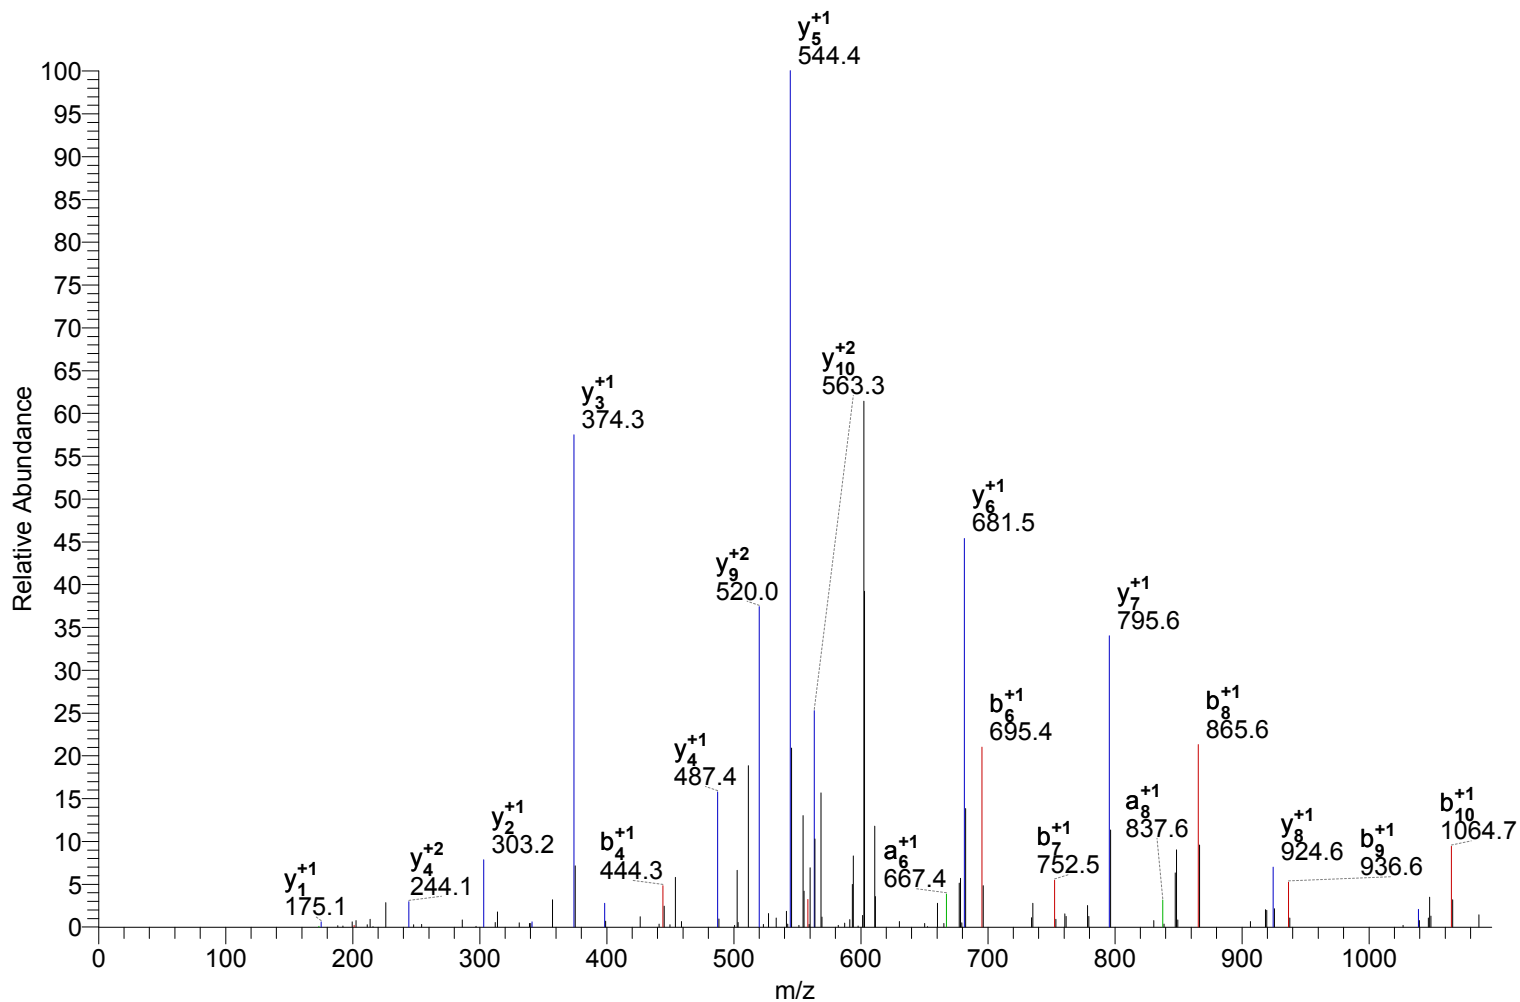



---

| Reference                          |          |         |   | P      | Score | Coverage | Accession |     |       |       |
|------------------------------------|----------|---------|---|--------|-------|----------|-----------|-----|-------|-------|
| Scan(s)                            | Sequence | MH+     | z | P      | XC    | DeltaCn  | Sp        | RSp | Ions  | Count |
| IPI:IPI00645038.1 TREMBL:Q5T985 EN |          |         |   | 1e-006 | 10.2  | 0.0      | 0         |     |       |       |
| 2118291816 - R.LSNENHGIAQR.I       |          | 1238.62 | 2 | 1e-006 | 4.292 | 0.485    | 789.7     | 1   | 18/30 | 2     |

1 of 1 peptide matches reported, 0 removed due to filtering

DTA for scans: 2118291816-26226248  
Precursor ion: 619.82  
Mass type: mono  
Mod's: (M\* +15.99492) C=161.01468

Ion series for charge: +1

| AA | A ions        | B ions         | B* ions | Bo ions | C ions | Y ions         | Y* ions | Yo ions | Z ions |
|----|---------------|----------------|---------|---------|--------|----------------|---------|---------|--------|
| L  | 86.10         | 114.09         |         |         |        |                |         |         |        |
| S  | <b>173.13</b> | <b>201.12</b>  |         |         |        | 1125.54        |         |         |        |
| N  | 287.17        | 315.17         |         |         |        | <b>1038.51</b> |         |         |        |
| E  | 416.21        | <b>444.21</b>  |         |         |        | <b>924.46</b>  |         |         |        |
| N  | 530.26        | <b>558.25</b>  |         |         |        | <b>795.42</b>  |         |         |        |
| H  | <b>667.32</b> | <b>695.31</b>  |         |         |        | <b>681.38</b>  |         |         |        |
| G  | 724.34        | <b>752.33</b>  |         |         |        | <b>544.32</b>  |         |         |        |
| I  | <b>837.42</b> | <b>865.42</b>  |         |         |        | <b>487.30</b>  |         |         |        |
| A  | 908.46        | <b>936.45</b>  |         |         |        | <b>374.21</b>  |         |         |        |
| Q  | 1036.52       | <b>1064.51</b> |         |         |        | <b>303.18</b>  |         |         |        |
| R  |               |                |         |         |        | <b>175.12</b>  |         |         |        |



#2118291816-26226248 NL: 2.79E5



---

| Reference                          |          |         |   | P      | Score | Coverage | Accession |     |       |       |
|------------------------------------|----------|---------|---|--------|-------|----------|-----------|-----|-------|-------|
| Scan(s)                            | Sequence | MH+     | z | P      | XC    | DeltaCn  | Sp        | RSp | Ions  | Count |
| IPI:IPI00910636.1 TREMBL:B4DM79 Ta |          |         |   | 1e-006 | 10.2  | 0.0      | 0         |     |       |       |
| 2118291816 - R.LSNENHGIAQR.I       |          | 1238.62 | 2 | 1e-006 | 4.292 | 0.485    | 789.7     | 1   | 18/30 | 2     |

1 of 1 peptide matches reported, 0 removed due to filtering

DTA for scans: 2118291816-26226248  
Precursor ion: 619.82  
Mass type: mono  
Mod's: (M\* +15.99492) C=161.01468

Ion series for charge: +1

| AA | A ions        | B ions         | B* ions | Bo ions | C ions | Y ions         | Y* ions | Yo ions | Z ions |
|----|---------------|----------------|---------|---------|--------|----------------|---------|---------|--------|
| L  | 86.10         | 114.09         |         |         |        |                |         |         |        |
| S  | <b>173.13</b> | <b>201.12</b>  |         |         |        | 1125.54        |         |         |        |
| N  | 287.17        | 315.17         |         |         |        | <b>1038.51</b> |         |         |        |
| E  | 416.21        | <b>444.21</b>  |         |         |        | <b>924.46</b>  |         |         |        |
| N  | 530.26        | <b>558.25</b>  |         |         |        | <b>795.42</b>  |         |         |        |
| H  | <b>667.32</b> | <b>695.31</b>  |         |         |        | <b>681.38</b>  |         |         |        |
| G  | 724.34        | <b>752.33</b>  |         |         |        | <b>544.32</b>  |         |         |        |
| I  | <b>837.42</b> | <b>865.42</b>  |         |         |        | <b>487.30</b>  |         |         |        |
| A  | 908.46        | <b>936.45</b>  |         |         |        | <b>374.21</b>  |         |         |        |
| Q  | 1036.52       | <b>1064.51</b> |         |         |        | <b>303.18</b>  |         |         |        |
| R  |               |                |         |         |        | <b>175.12</b>  |         |         |        |



#2118291816-26226248 NL: 2.79E5



---

| Reference                                                      |                   |         |   | P      | Score | Coverage | Accession |     |       |       |
|----------------------------------------------------------------|-------------------|---------|---|--------|-------|----------|-----------|-----|-------|-------|
| Scan(s)                                                        | Sequence          | MH+     | z | P      | XC    | DeltaCn  | Sp        | RSp | Ions  | Count |
| IPI:IPI00017601.1 SWISS-PROT:P00450 TREMBL:A5PL27;A8K5A4;B7Z5Q |                   |         |   | 1e-006 | 20.2  | 0.0      | 0         |     |       |       |
| 19287468 - 1                                                   | K.ALYLQYTDETFR.T  | 1519.74 | 2 | 1e-006 | 4.725 | 0.473    | 1101.8    | 1   | 20/33 | 1     |
| 2118291816 -                                                   | K.VNKDDEEFIESNK.M | 1566.73 | 3 | 3e-005 | 3.718 | 0.554    | 800.2     | 1   | 25/72 | 2     |

2 of 2 peptide matches reported, 0 removed due to filtering

DTA for scans: 19287468-1  
Precursor ion: 760.38  
Mass type: mono  
Mod's: (M\* +15.99492) C=161.01468

Ion series for charge: +1

| AA | A ions        | B ions         | B* ions | Bo ions | C ions | Y ions         | Y* ions | Yo ions | Z ions |
|----|---------------|----------------|---------|---------|--------|----------------|---------|---------|--------|
| A  | 44.05         | 72.04          |         |         |        |                |         |         |        |
| L  | 157.13        | 185.13         |         |         |        | 1448.71        |         |         |        |
| Y  | 320.20        | <b>348.19</b>  |         |         |        | <b>1335.62</b> |         |         |        |
| L  | <b>433.28</b> | <b>461.28</b>  |         |         |        | <b>1172.56</b> |         |         |        |
| Q  | <b>561.34</b> | <b>589.33</b>  |         |         |        | <b>1059.47</b> |         |         |        |
| Y  | <b>724.40</b> | 752.40         |         |         |        | <b>931.42</b>  |         |         |        |
| T  | 825.45        | <b>853.45</b>  |         |         |        | <b>768.35</b>  |         |         |        |
| D  | 940.48        | <b>968.47</b>  |         |         |        | <b>667.30</b>  |         |         |        |
| E  | 1069.52       | <b>1097.51</b> |         |         |        | <b>552.28</b>  |         |         |        |
| T  | 1170.57       | <b>1198.56</b> |         |         |        | <b>423.24</b>  |         |         |        |
| F  | 1317.64       | <b>1345.63</b> |         |         |        | <b>322.19</b>  |         |         |        |
| R  |               |                |         |         |        | 175.12         |         |         |        |



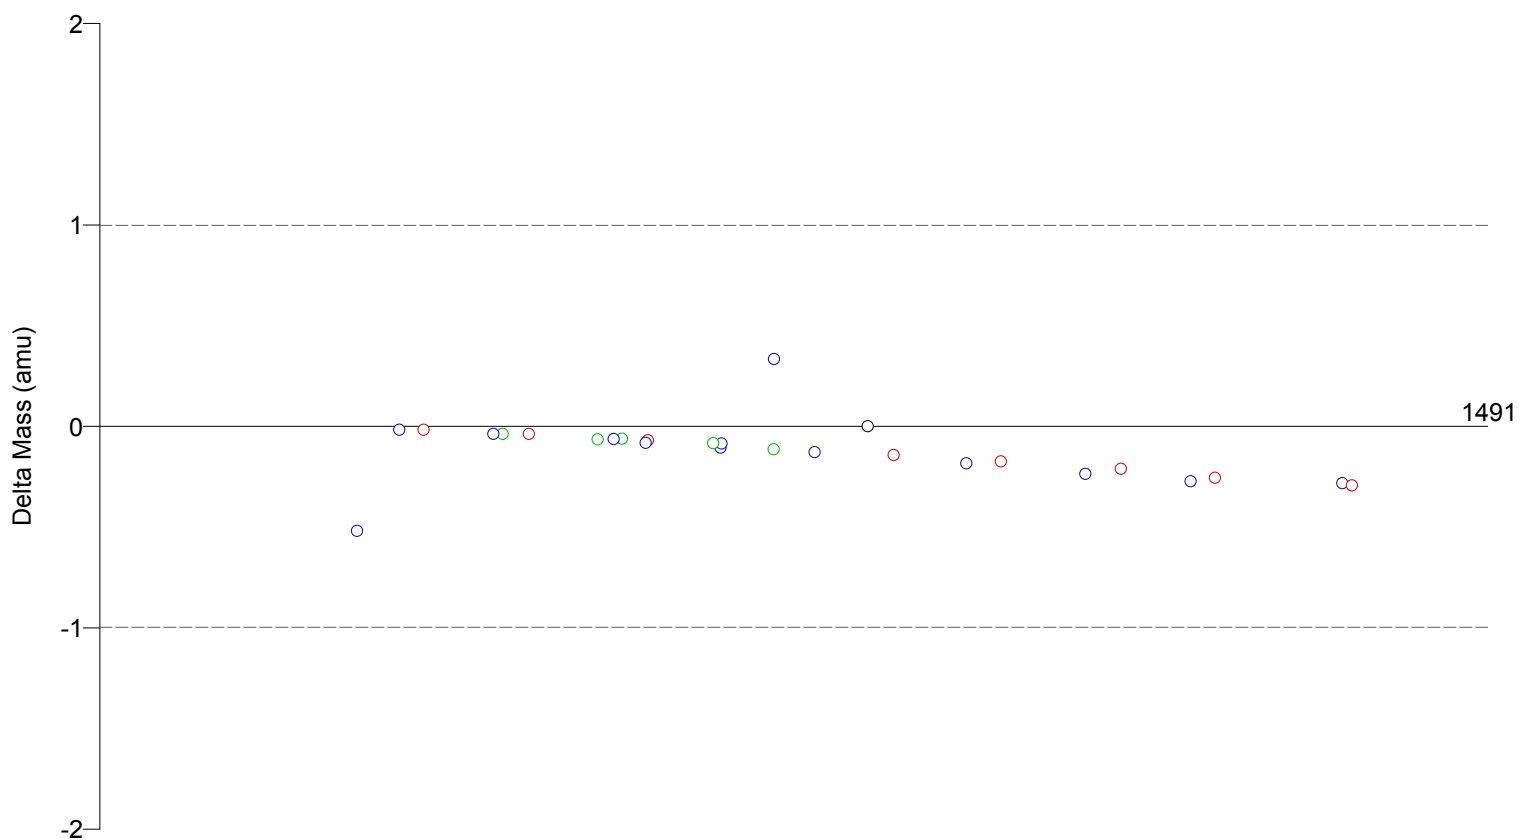

#19287468-1 NL: 6.47E4

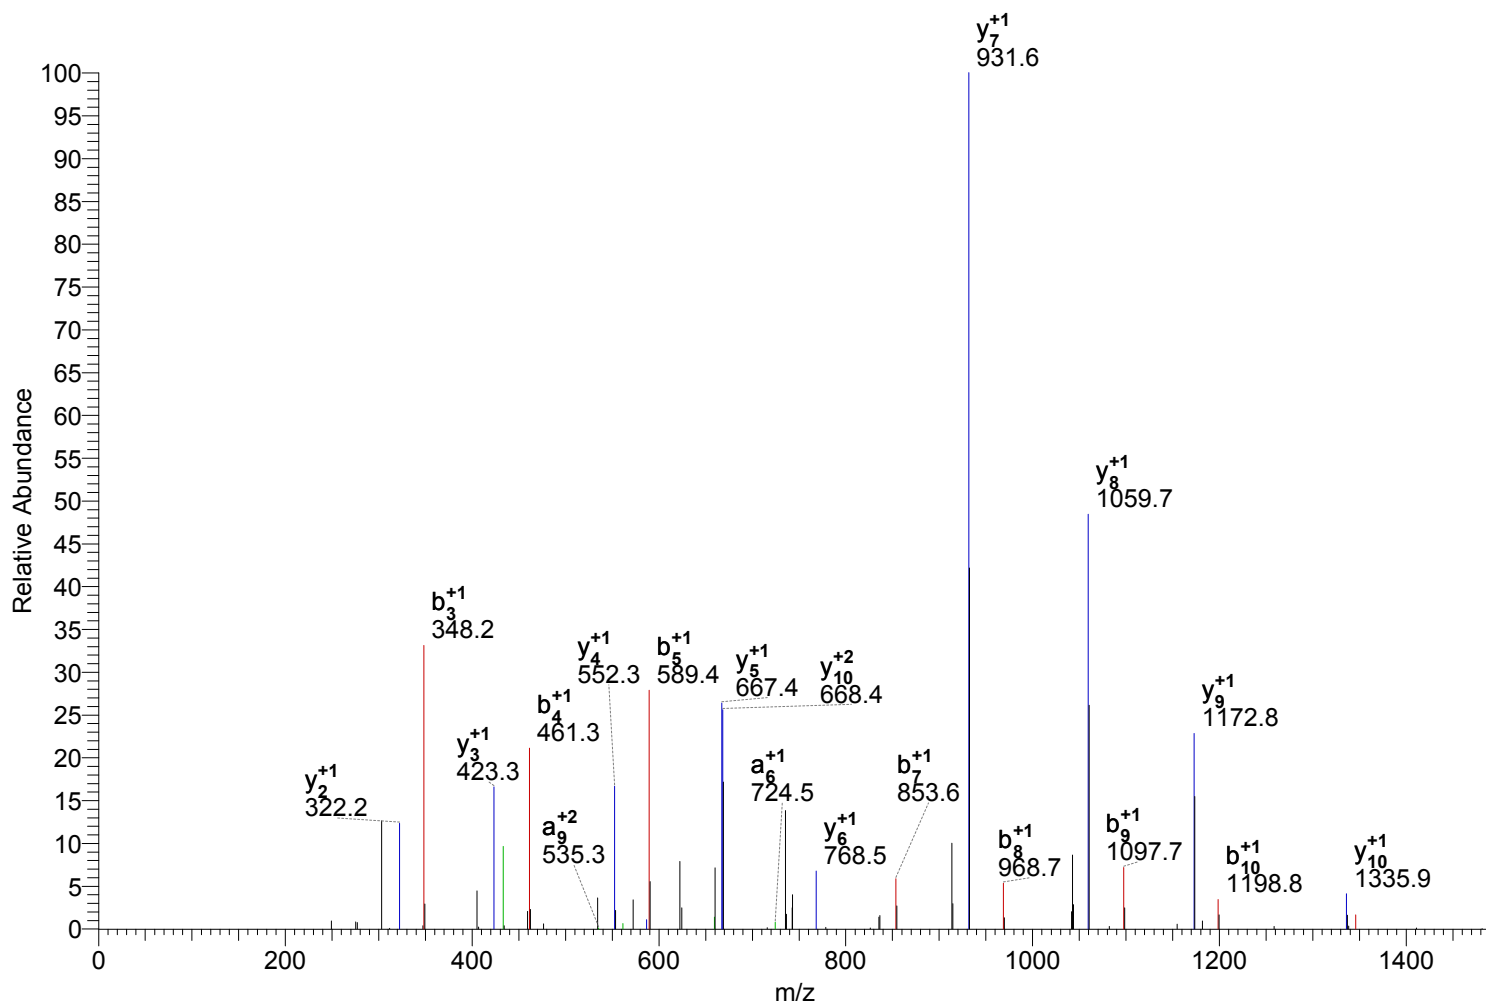

DTA for scans: 2118291816-26226248  
Precursor ion: 522.91  
Mass type: mono  
Mod's: (M\* +15.99492) C=161.01468

Ion series for charge: +1

| AA | A ions        | B ions        | B* ions | Bo ions | C ions | Y ions        | Y* ions | Yo ions | Z ions |
|----|---------------|---------------|---------|---------|--------|---------------|---------|---------|--------|
| V  | 72.08         | 100.08        |         |         |        |               |         |         |        |
| N  | 186.12        | <b>214.12</b> |         |         |        | 1467.66       |         |         |        |
| K  | <b>314.22</b> | <b>342.21</b> |         |         |        | 1353.62       |         |         |        |
| D  | 429.25        | 457.24        |         |         |        | 1225.52       |         |         |        |
| D  | 544.27        | <b>572.27</b> |         |         |        | 1110.49       |         |         |        |
| E  | 673.32        | <b>701.31</b> |         |         |        | 995.47        |         |         |        |
| E  | 802.36        | <b>830.35</b> |         |         |        | <b>866.43</b> |         |         |        |
| F  | 949.43        | <b>977.42</b> |         |         |        | <b>737.38</b> |         |         |        |
| I  | 1062.51       | 1090.51       |         |         |        | <b>590.31</b> |         |         |        |
| E  | 1191.55       | 1219.55       |         |         |        | <b>477.23</b> |         |         |        |
| S  | 1278.58       | 1306.58       |         |         |        | <b>348.19</b> |         |         |        |
| N  | 1392.63       | 1420.62       |         |         |        | <b>261.16</b> |         |         |        |
| K  |               |               |         |         |        | 147.11        |         |         |        |

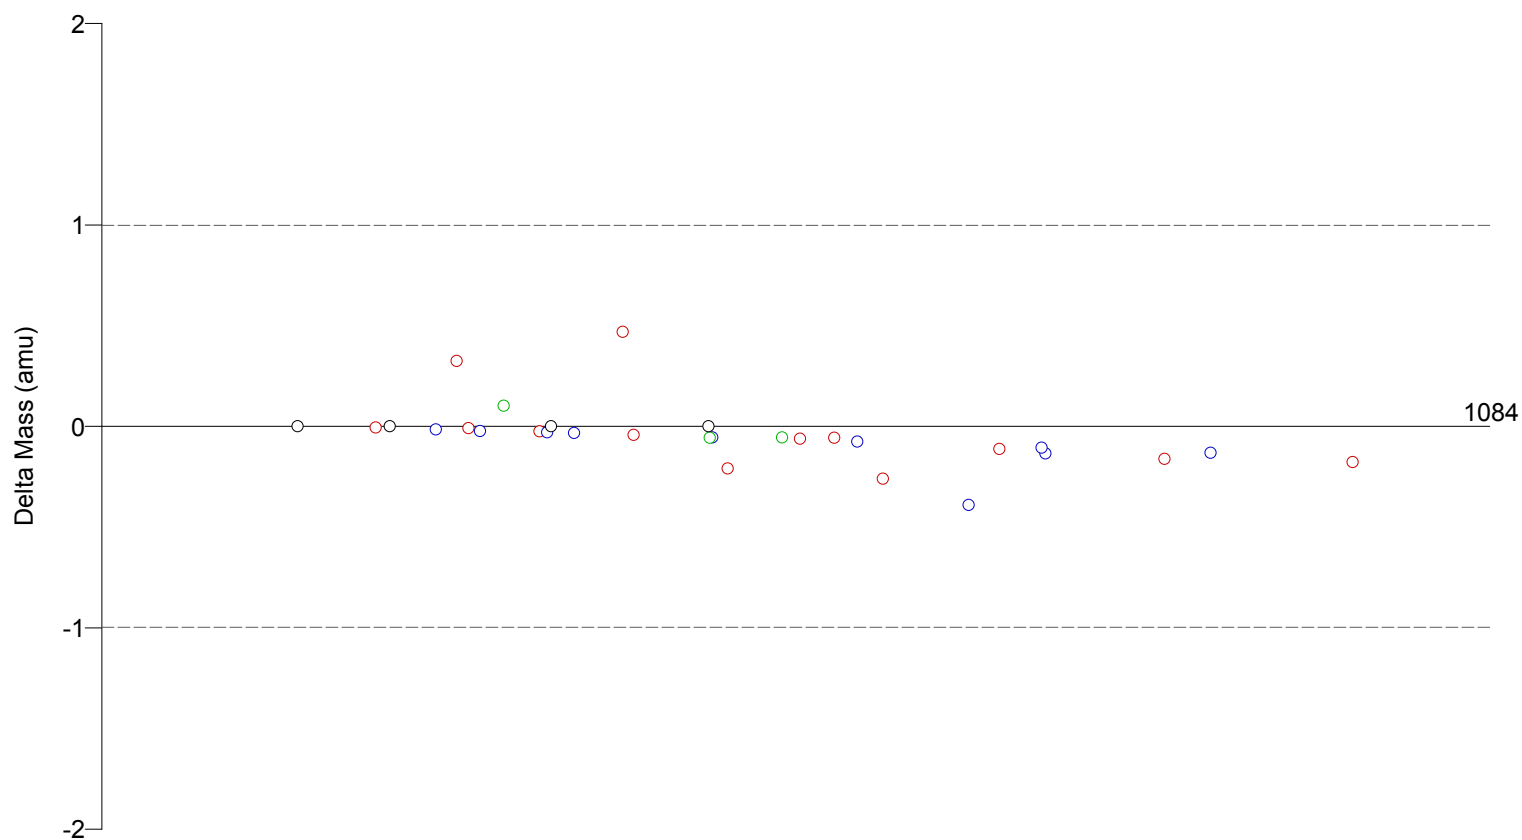

#2118291816-26226248 NL: 8.32E4

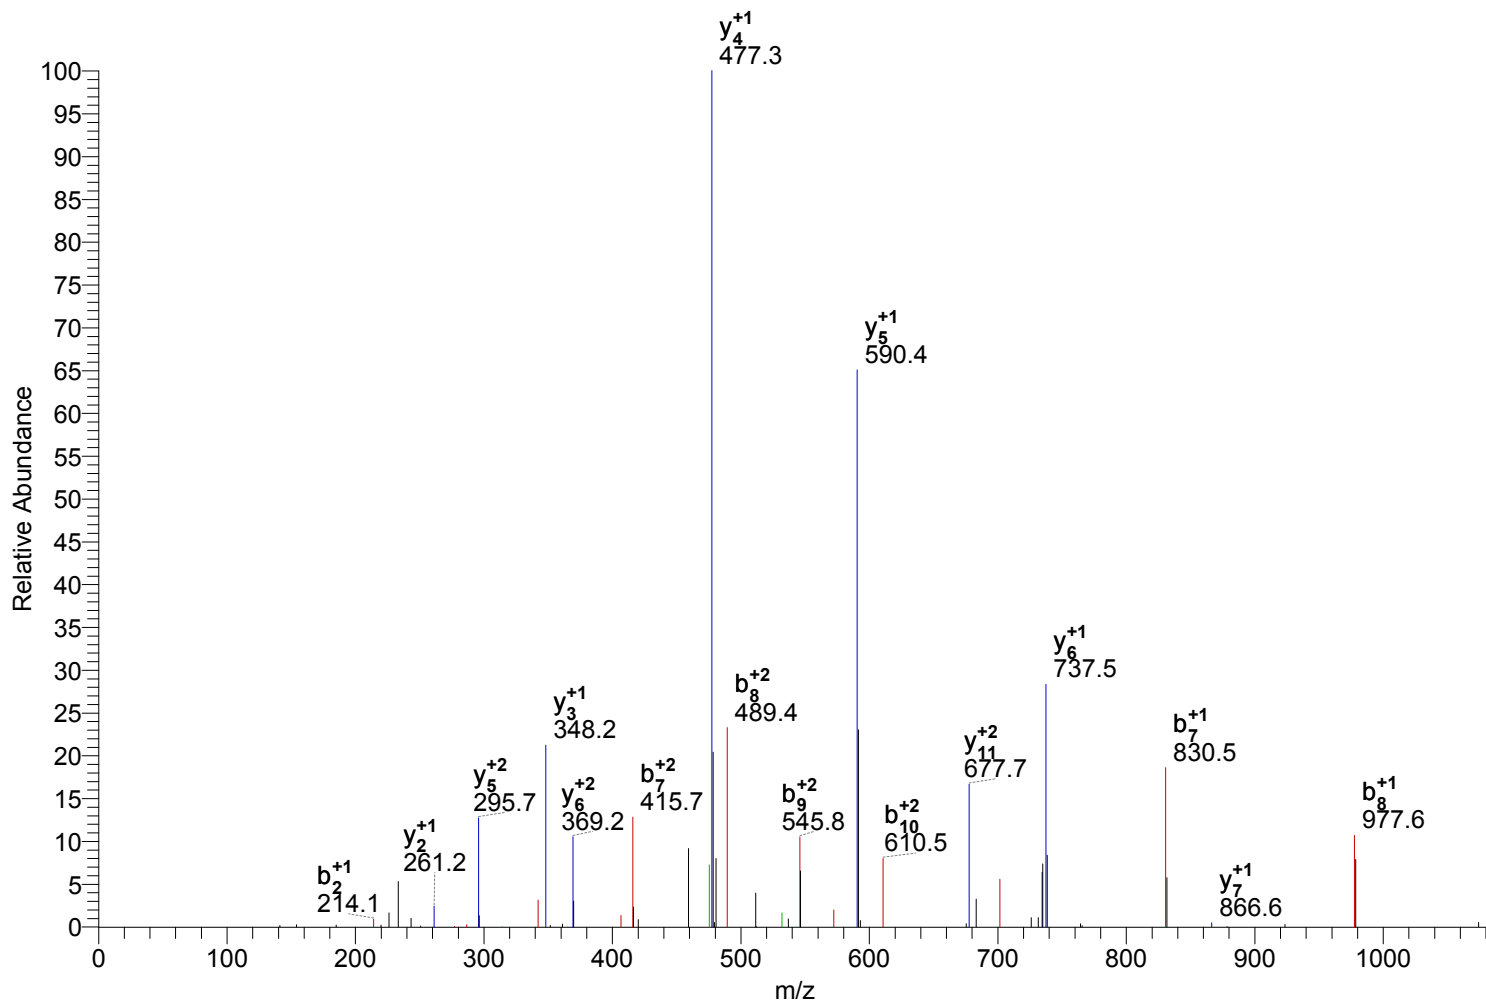

---

| Reference                          |                  |         |   | P      | Score | Coverage | Accession |     |       |       |
|------------------------------------|------------------|---------|---|--------|-------|----------|-----------|-----|-------|-------|
| Scan(s)                            | Sequence         | MH+     | z | P      | XC    | DeltaCn  | Sp        | RSp | Ions  | Count |
| IPI:IPI00879084.1 VEGA:OTTHUMP0000 |                  |         |   | 1e-006 | 10.2  | 0.0      | 0         |     |       |       |
| 19287468 - 1                       | K.ALYLQYTDETFR.T | 1519.74 | 2 | 1e-006 | 4.725 | 0.473    | 1101.8    | 1   | 20/33 | 1     |

1 of 1 peptide matches reported, 0 removed due to filtering

DTA for scans: 19287468-1  
Precursor ion: 760.38  
Mass type: mono  
Mod's: (M\* +15.99492) C=161.01468

Ion series for charge: +1

| AA | A ions        | B ions         | B* ions | Bo ions | C ions | Y ions         | Y* ions | Yo ions | Z ions |
|----|---------------|----------------|---------|---------|--------|----------------|---------|---------|--------|
| A  | 44.05         | 72.04          |         |         |        |                |         |         |        |
| L  | 157.13        | 185.13         |         |         |        | 1448.71        |         |         |        |
| Y  | 320.20        | <b>348.19</b>  |         |         |        | <b>1335.62</b> |         |         |        |
| L  | <b>433.28</b> | <b>461.28</b>  |         |         |        | <b>1172.56</b> |         |         |        |
| Q  | <b>561.34</b> | <b>589.33</b>  |         |         |        | <b>1059.47</b> |         |         |        |
| Y  | <b>724.40</b> | 752.40         |         |         |        | <b>931.42</b>  |         |         |        |
| T  | 825.45        | <b>853.45</b>  |         |         |        | <b>768.35</b>  |         |         |        |
| D  | 940.48        | <b>968.47</b>  |         |         |        | <b>667.30</b>  |         |         |        |
| E  | 1069.52       | <b>1097.51</b> |         |         |        | <b>552.28</b>  |         |         |        |
| T  | 1170.57       | <b>1198.56</b> |         |         |        | <b>423.24</b>  |         |         |        |
| F  | 1317.64       | <b>1345.63</b> |         |         |        | <b>322.19</b>  |         |         |        |
| R  |               |                |         |         |        | 175.12         |         |         |        |

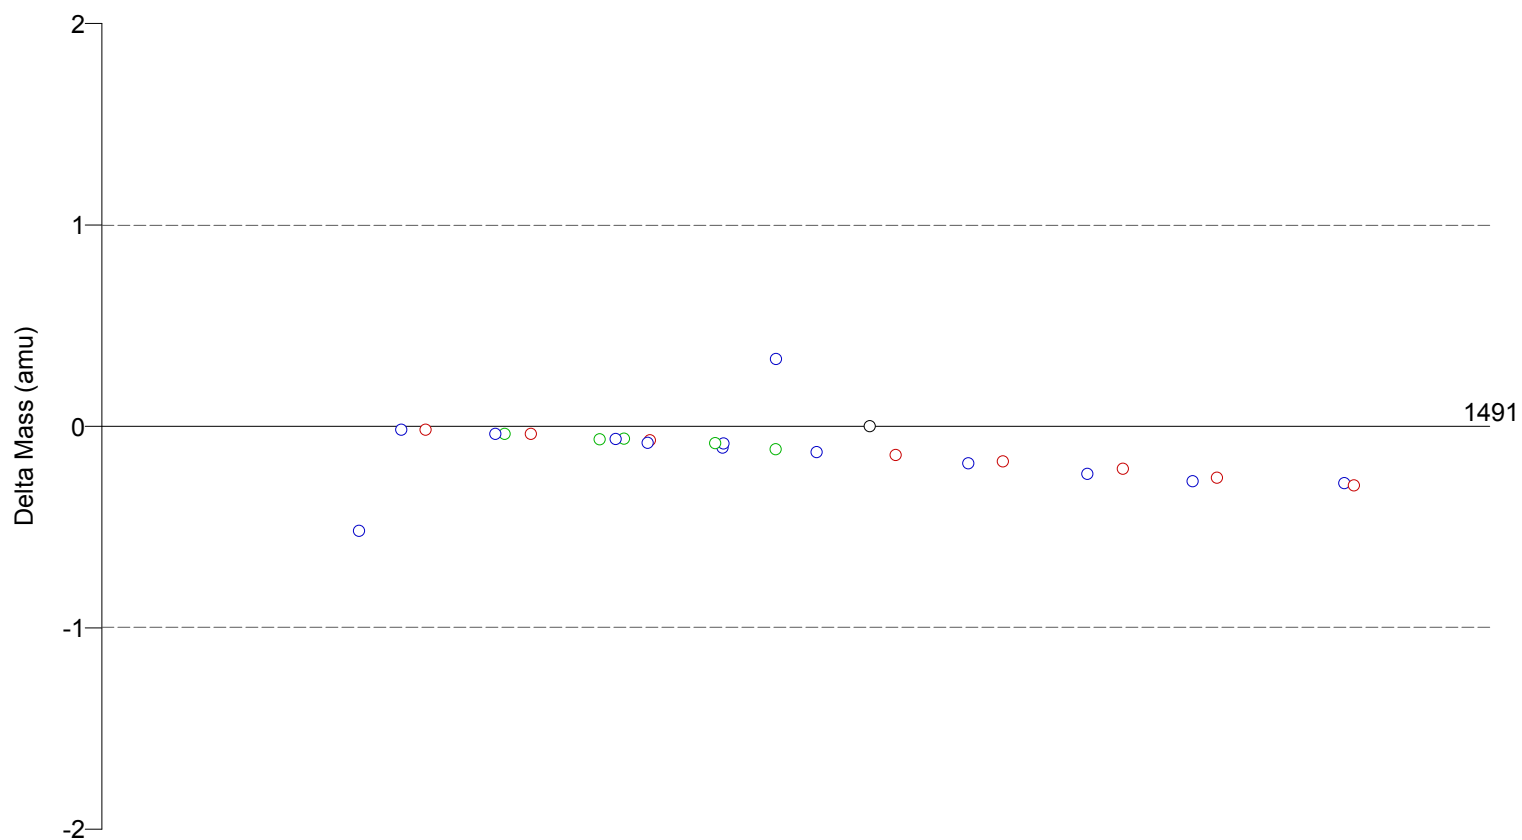

#19287468-1 NL: 6.47E4

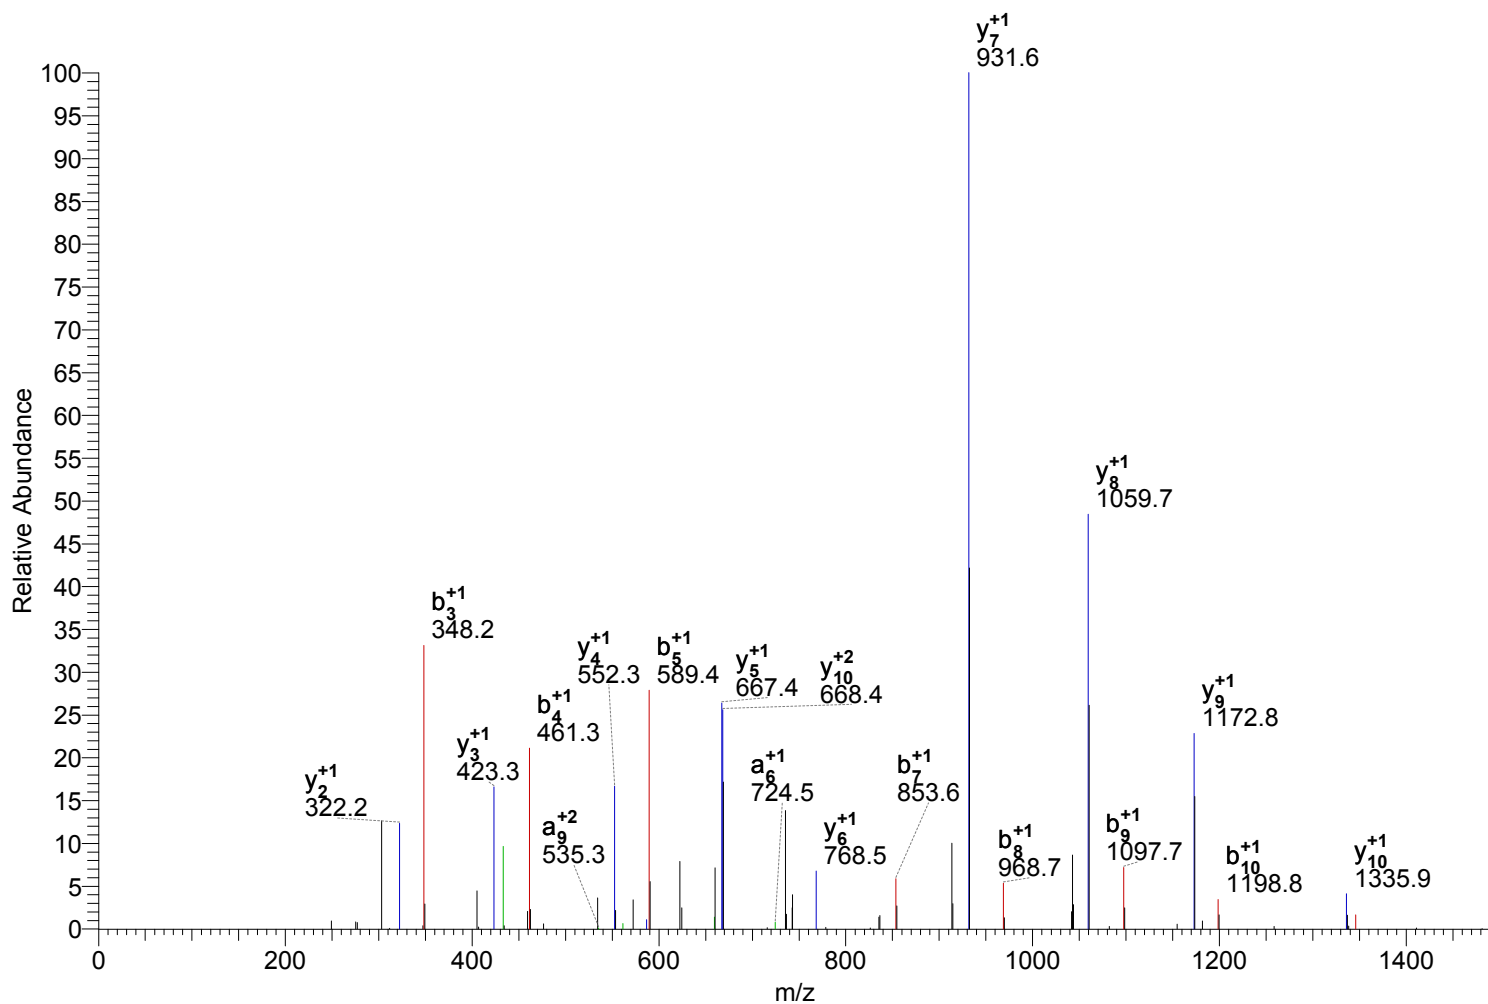

---

| Reference                          |                      |         |   | P      | Score | Coverage | Accession |     |       |       |
|------------------------------------|----------------------|---------|---|--------|-------|----------|-----------|-----|-------|-------|
| Scan(s)                            | Sequence             | MH+     | z | P      | XC    | DeltaCn  | Sp        | RSp | Ions  | Count |
| IPI:IPI00916434.1 TREMBL:A2KBB9;A2 |                      |         |   | 1e-006 | 20.2  | 0.0      |           | 0   |       |       |
| 19287468 - 1                       | R.FSGSGSGTDFTLTISR.L | 1632.79 | 2 | 1e-006 | 3.219 | 0.589    | 674.9     | 1   | 19/45 | 14    |
| 19287468 - 1                       | K.NTLYLQMNSLR.A      | 1352.70 | 2 | 3e-006 | 4.027 | 0.643    | 1526.5    | 1   | 20/30 | 39    |

2 of 2 peptide matches reported, 0 removed due to filtering

DTA for scans: 19287468-1  
Precursor ion: 816.90  
Mass type: mono  
Mod's: (M\* +15.99492) C=161.01468

Ion series for charge: +1

| AA | A ions        | B ions         | B* ions | Bo ions | C ions | Y ions         | Y* ions | Yo ions | Z ions |
|----|---------------|----------------|---------|---------|--------|----------------|---------|---------|--------|
| F  | 120.08        | 148.08         |         |         |        |                |         |         |        |
| S  | 207.11        | 235.11         |         |         |        | 1485.72        |         |         |        |
| G  | 264.13        | 292.13         |         |         |        | 1398.69        |         |         |        |
| S  | 351.17        | <b>379.16</b>  |         |         |        | <b>1341.66</b> |         |         |        |
| G  | 408.19        | 436.18         |         |         |        | <b>1254.63</b> |         |         |        |
| S  | 495.22        | <b>523.21</b>  |         |         |        | <b>1197.61</b> |         |         |        |
| G  | <b>552.24</b> | 580.24         |         |         |        | <b>1110.58</b> |         |         |        |
| T  | 653.29        | <b>681.28</b>  |         |         |        | <b>1053.56</b> |         |         |        |
| D  | 768.32        | <b>796.31</b>  |         |         |        | <b>952.51</b>  |         |         |        |
| F  | 915.38        | <b>943.38</b>  |         |         |        | <b>837.48</b>  |         |         |        |
| T  | 1016.43       | 1044.43        |         |         |        | <b>690.41</b>  |         |         |        |
| L  | 1129.52       | <b>1157.51</b> |         |         |        | <b>589.37</b>  |         |         |        |
| T  | 1230.56       | 1258.56        |         |         |        | <b>476.28</b>  |         |         |        |
| I  | 1343.65       | 1371.64        |         |         |        | <b>375.24</b>  |         |         |        |
| S  | 1430.68       | 1458.67        |         |         |        | <b>262.15</b>  |         |         |        |
| R  |               |                |         |         |        | 175.12         |         |         |        |



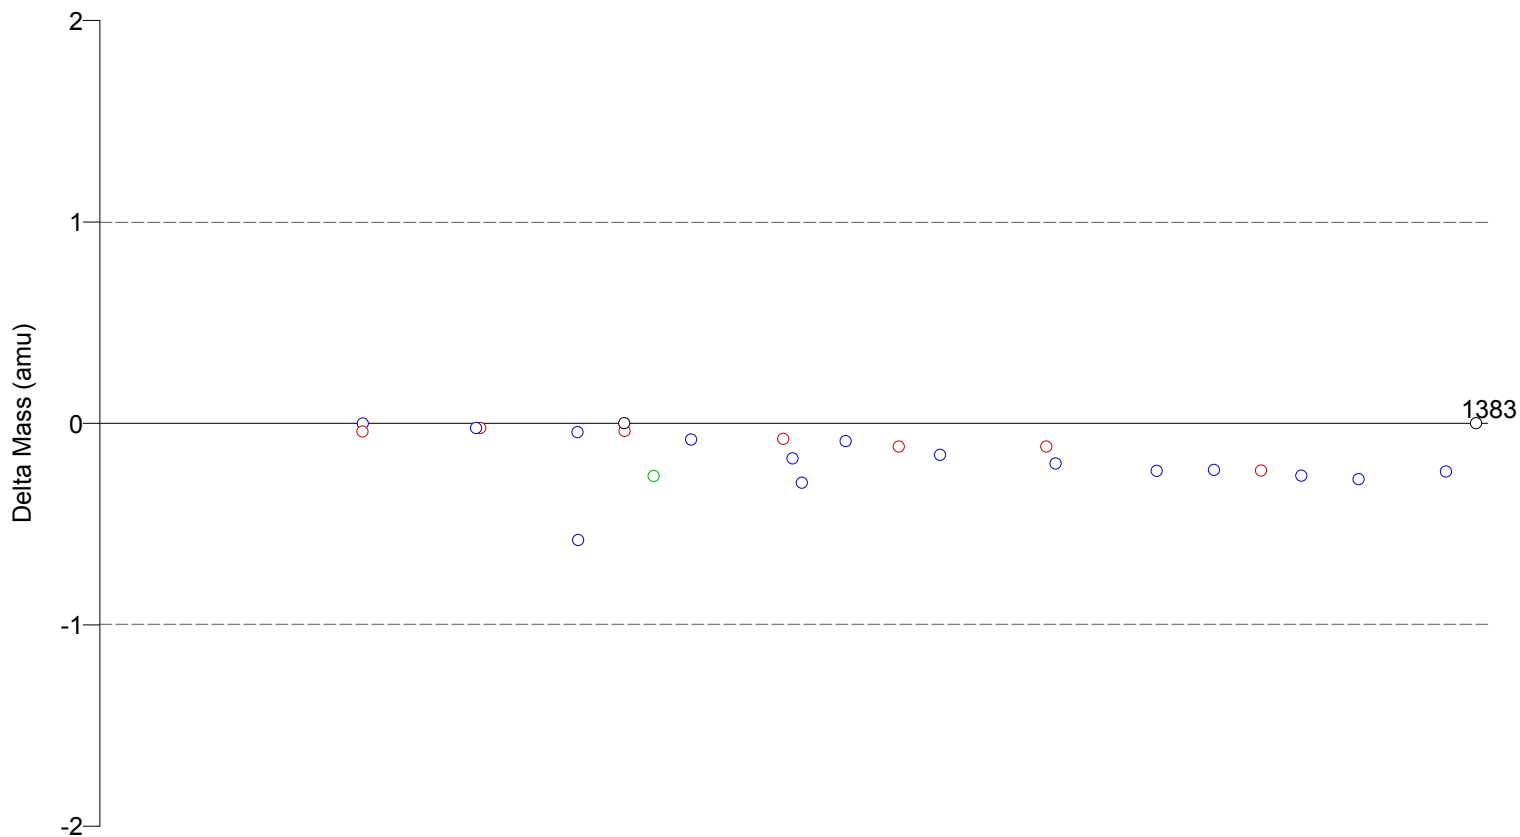

#19287468-1 NL: 6.55E4

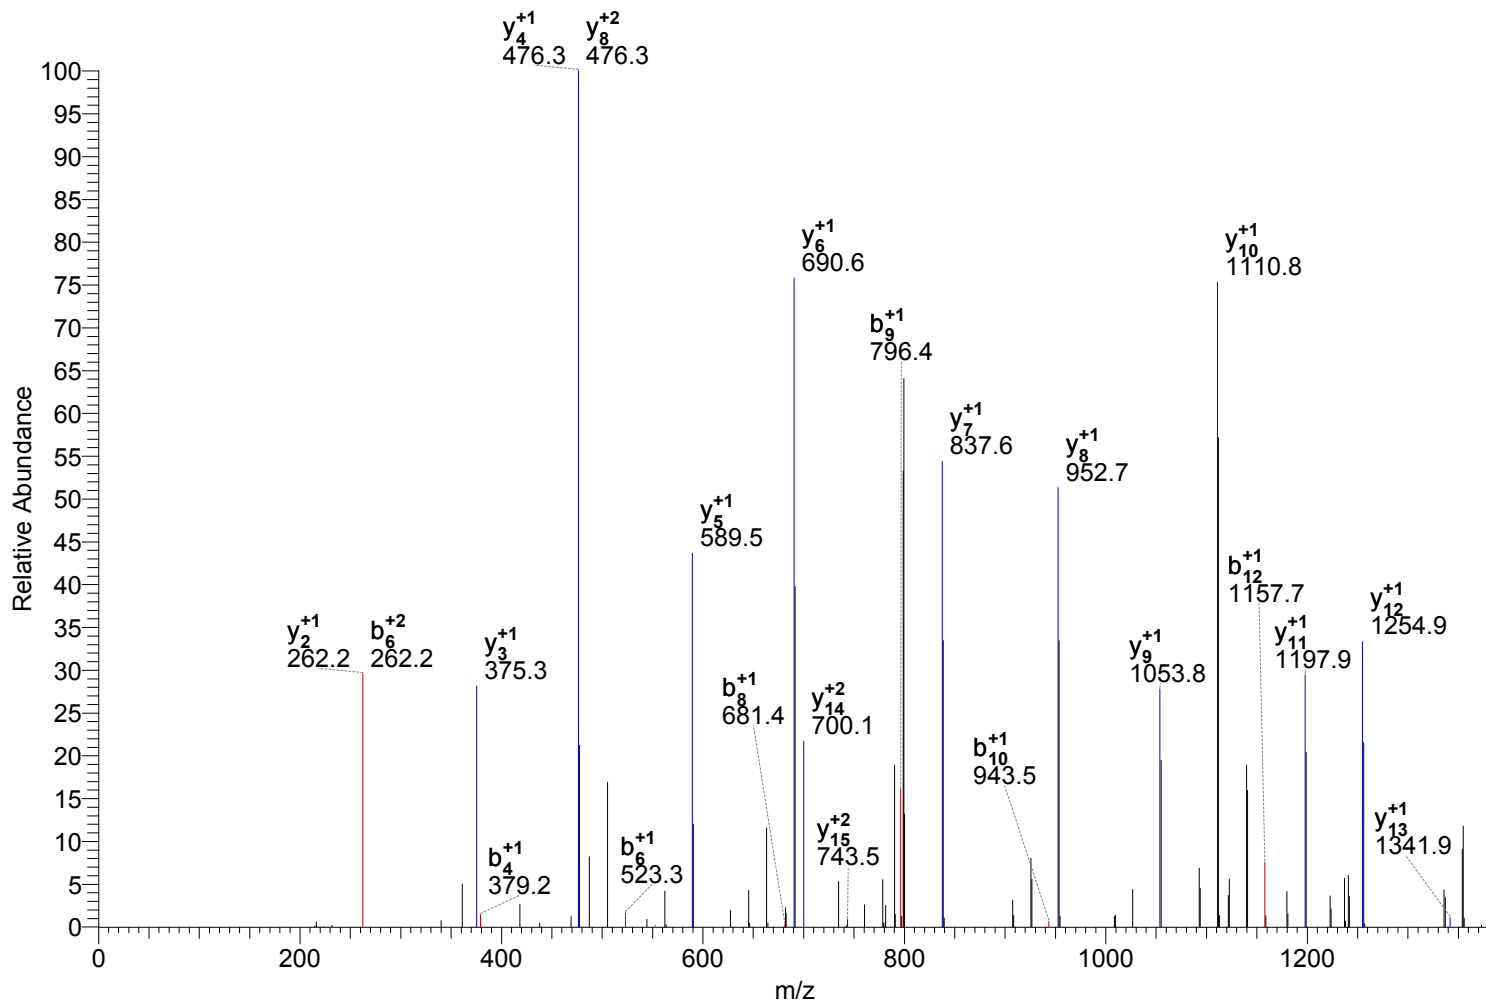

DTA for scans: 19287468-1  
Precursor ion: 676.85  
Mass type: mono  
Mod's: (M\* +15.99492) C=161.01468

Ion series for charge: +1

| AA | A ions        | B ions         | B* ions | Bo ions | C ions | Y ions         | Y* ions | Yo ions | Z ions |
|----|---------------|----------------|---------|---------|--------|----------------|---------|---------|--------|
| N  | 87.06         | 115.05         |         |         |        |                |         |         |        |
| T  | 188.10        | <b>216.10</b>  |         |         |        | 1238.66        |         |         |        |
| L  | <b>301.19</b> | <b>329.18</b>  |         |         |        | <b>1137.61</b> |         |         |        |
| Y  | <b>464.25</b> | <b>492.25</b>  |         |         |        | <b>1024.52</b> |         |         |        |
| L  | <b>577.33</b> | <b>605.33</b>  |         |         |        | <b>861.46</b>  |         |         |        |
| Q  | 705.39        | <b>733.39</b>  |         |         |        | <b>748.38</b>  |         |         |        |
| M  | 836.43        | <b>864.43</b>  |         |         |        | <b>620.32</b>  |         |         |        |
| N  | 950.48        | <b>978.47</b>  |         |         |        | <b>489.28</b>  |         |         |        |
| S  | 1037.51       | <b>1065.50</b> |         |         |        | <b>375.24</b>  |         |         |        |
| L  | 1150.59       | <b>1178.59</b> |         |         |        | <b>288.20</b>  |         |         |        |
| R  |               |                |         |         |        | 175.12         |         |         |        |

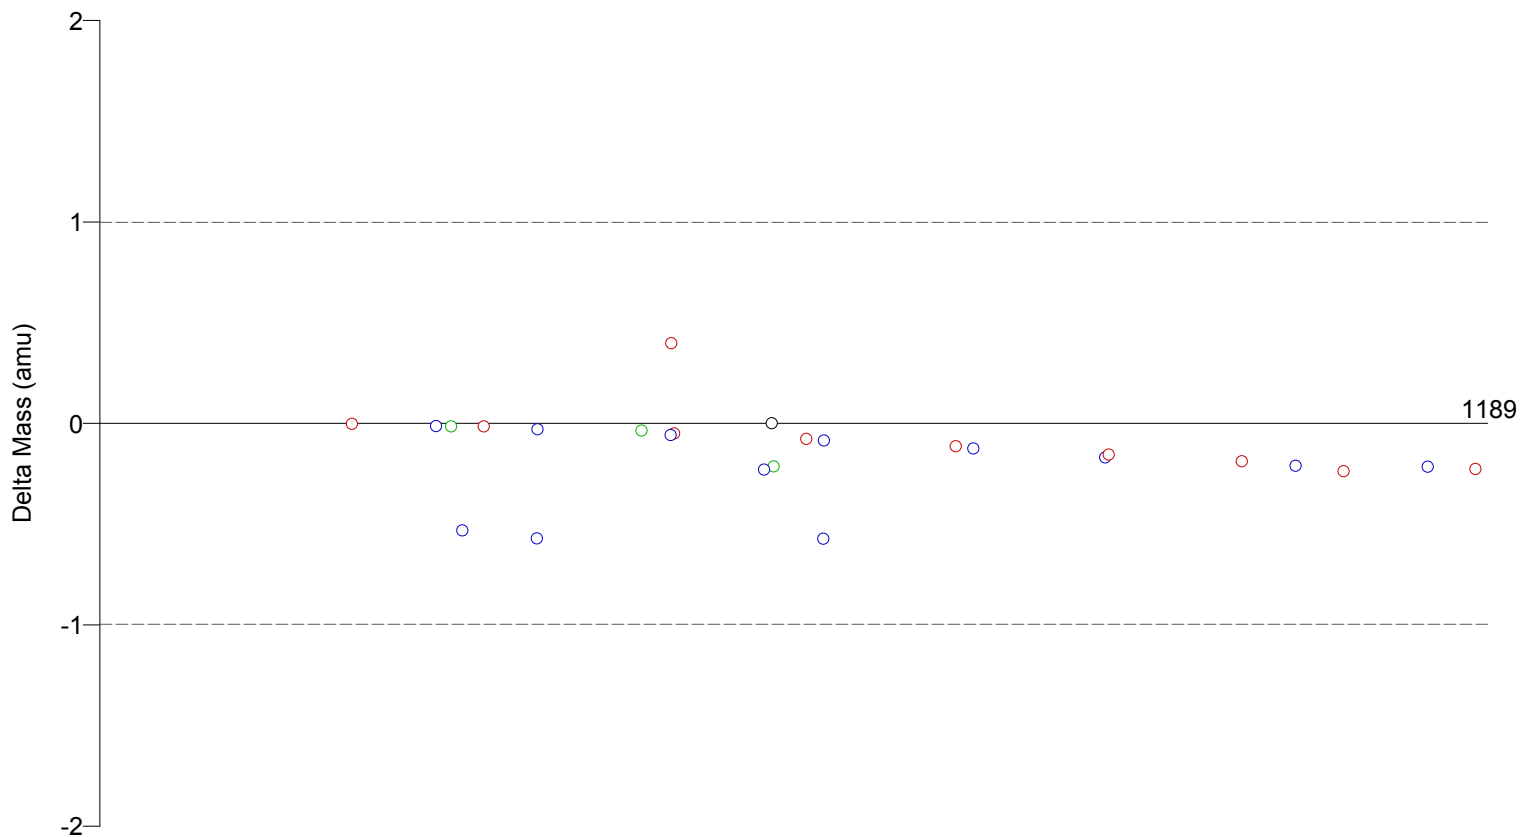

#19287468-1 NL: 1.01E5

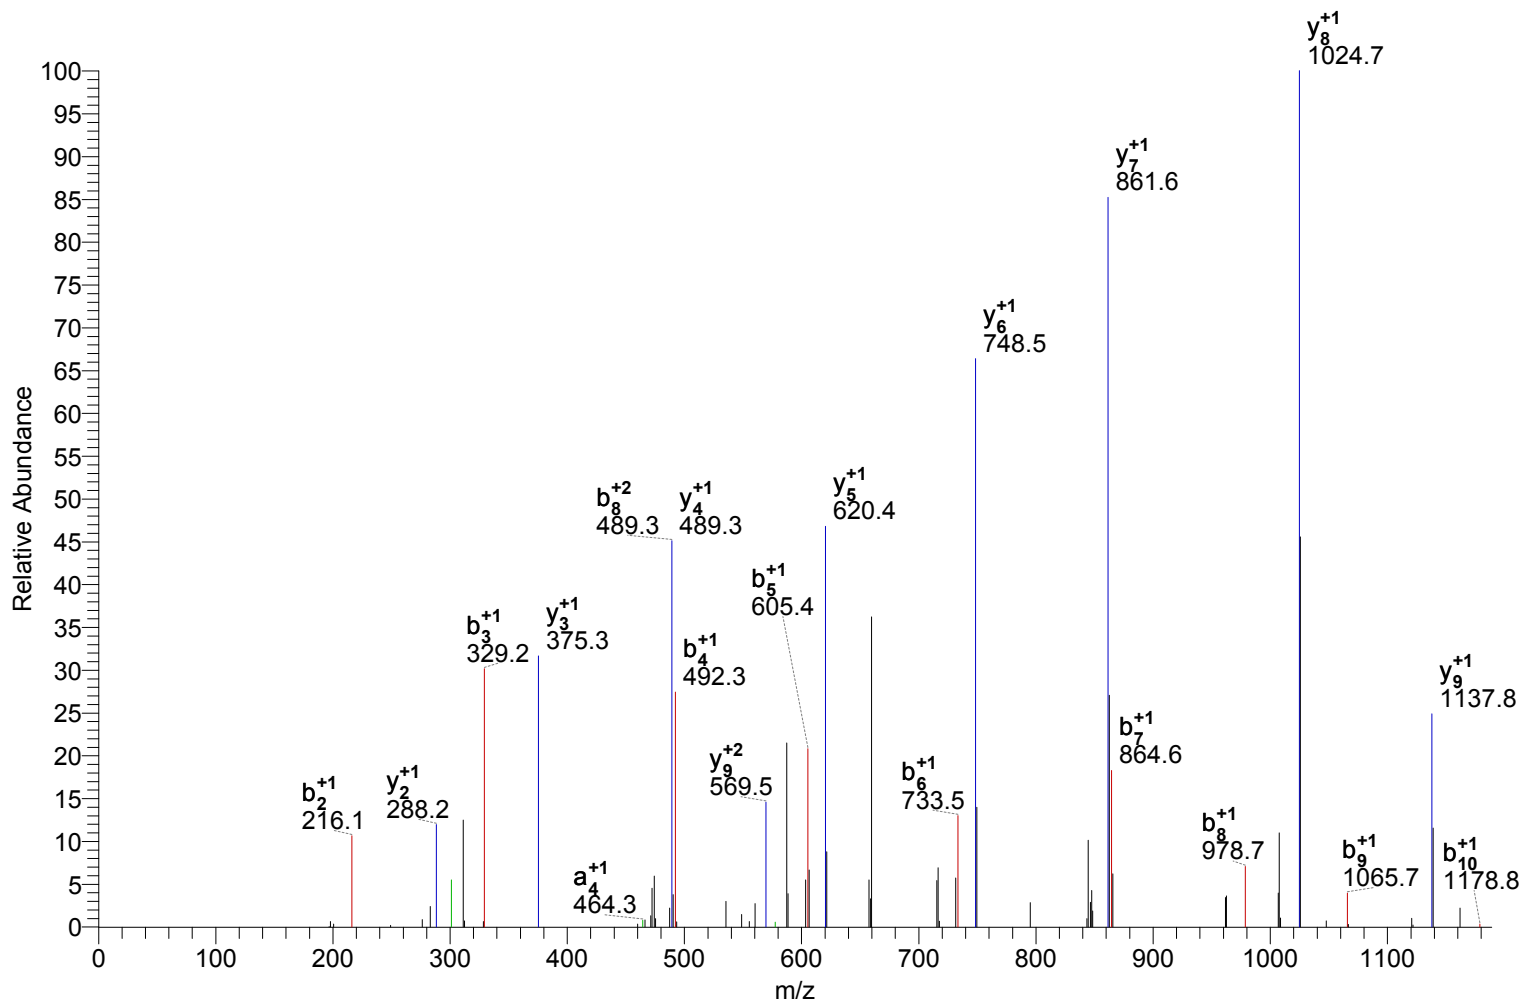

---

| Reference                          |                      |         |   | P      | Score | Coverage | Accession |     |       |       |
|------------------------------------|----------------------|---------|---|--------|-------|----------|-----------|-----|-------|-------|
| Scan(s)                            | Sequence             | MH+     | z | P      | XC    | DeltaCn  | Sp        | RSp | Ions  | Count |
| IPI:IPI00929201.1 TREMBL:A2KBC2;A2 |                      |         |   | 1e-006 | 20.2  | 0.0      | 0         |     |       |       |
| 19287468 - 1                       | R.FSGSGSGTDFTLTISR.L | 1632.79 | 2 | 1e-006 | 3.219 | 0.589    | 674.9     | 1   | 19/45 | 14    |
| 19287468 - 1                       | K.NTLYLQMNSLR.A      | 1352.70 | 2 | 3e-006 | 4.027 | 0.643    | 1526.5    | 1   | 20/30 | 39    |

2 of 2 peptide matches reported, 0 removed due to filtering

DTA for scans: 19287468-1  
Precursor ion: 816.90  
Mass type: mono  
Mod's: (M\* +15.99492) C=161.01468

Ion series for charge: +1

| AA | A ions        | B ions         | B* ions | Bo ions | C ions | Y ions         | Y* ions | Yo ions | Z ions |
|----|---------------|----------------|---------|---------|--------|----------------|---------|---------|--------|
| F  | 120.08        | 148.08         |         |         |        |                |         |         |        |
| S  | 207.11        | 235.11         |         |         |        | 1485.72        |         |         |        |
| G  | 264.13        | 292.13         |         |         |        | 1398.69        |         |         |        |
| S  | 351.17        | <b>379.16</b>  |         |         |        | <b>1341.66</b> |         |         |        |
| G  | 408.19        | 436.18         |         |         |        | <b>1254.63</b> |         |         |        |
| S  | 495.22        | <b>523.21</b>  |         |         |        | <b>1197.61</b> |         |         |        |
| G  | <b>552.24</b> | 580.24         |         |         |        | <b>1110.58</b> |         |         |        |
| T  | 653.29        | <b>681.28</b>  |         |         |        | <b>1053.56</b> |         |         |        |
| D  | 768.32        | <b>796.31</b>  |         |         |        | <b>952.51</b>  |         |         |        |
| F  | 915.38        | <b>943.38</b>  |         |         |        | <b>837.48</b>  |         |         |        |
| T  | 1016.43       | 1044.43        |         |         |        | <b>690.41</b>  |         |         |        |
| L  | 1129.52       | <b>1157.51</b> |         |         |        | <b>589.37</b>  |         |         |        |
| T  | 1230.56       | 1258.56        |         |         |        | <b>476.28</b>  |         |         |        |
| I  | 1343.65       | 1371.64        |         |         |        | <b>375.24</b>  |         |         |        |
| S  | 1430.68       | 1458.67        |         |         |        | <b>262.15</b>  |         |         |        |
| R  |               |                |         |         |        | 175.12         |         |         |        |

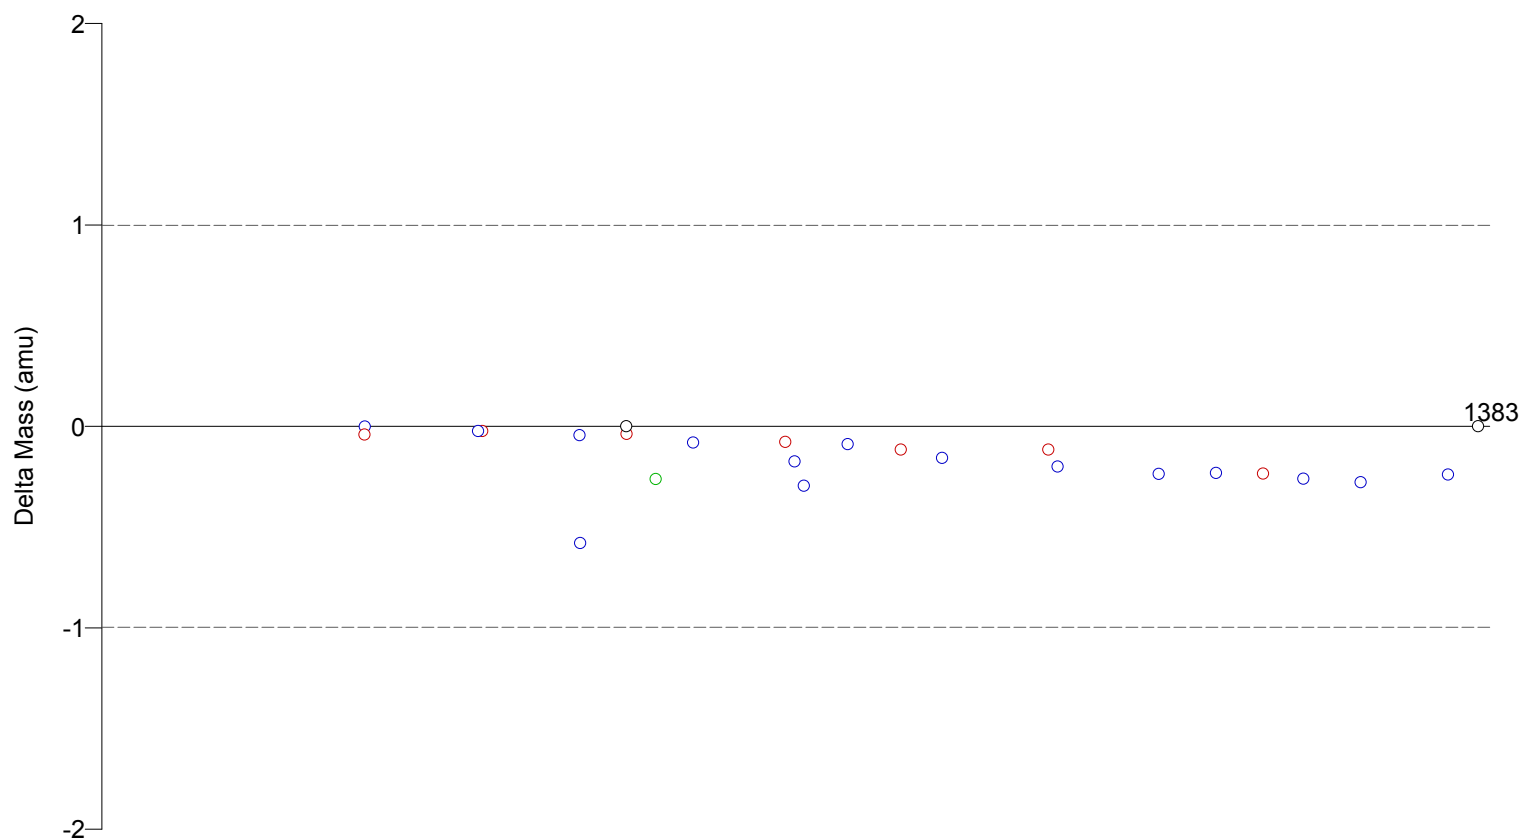

#19287468-1 NL: 6.55E4

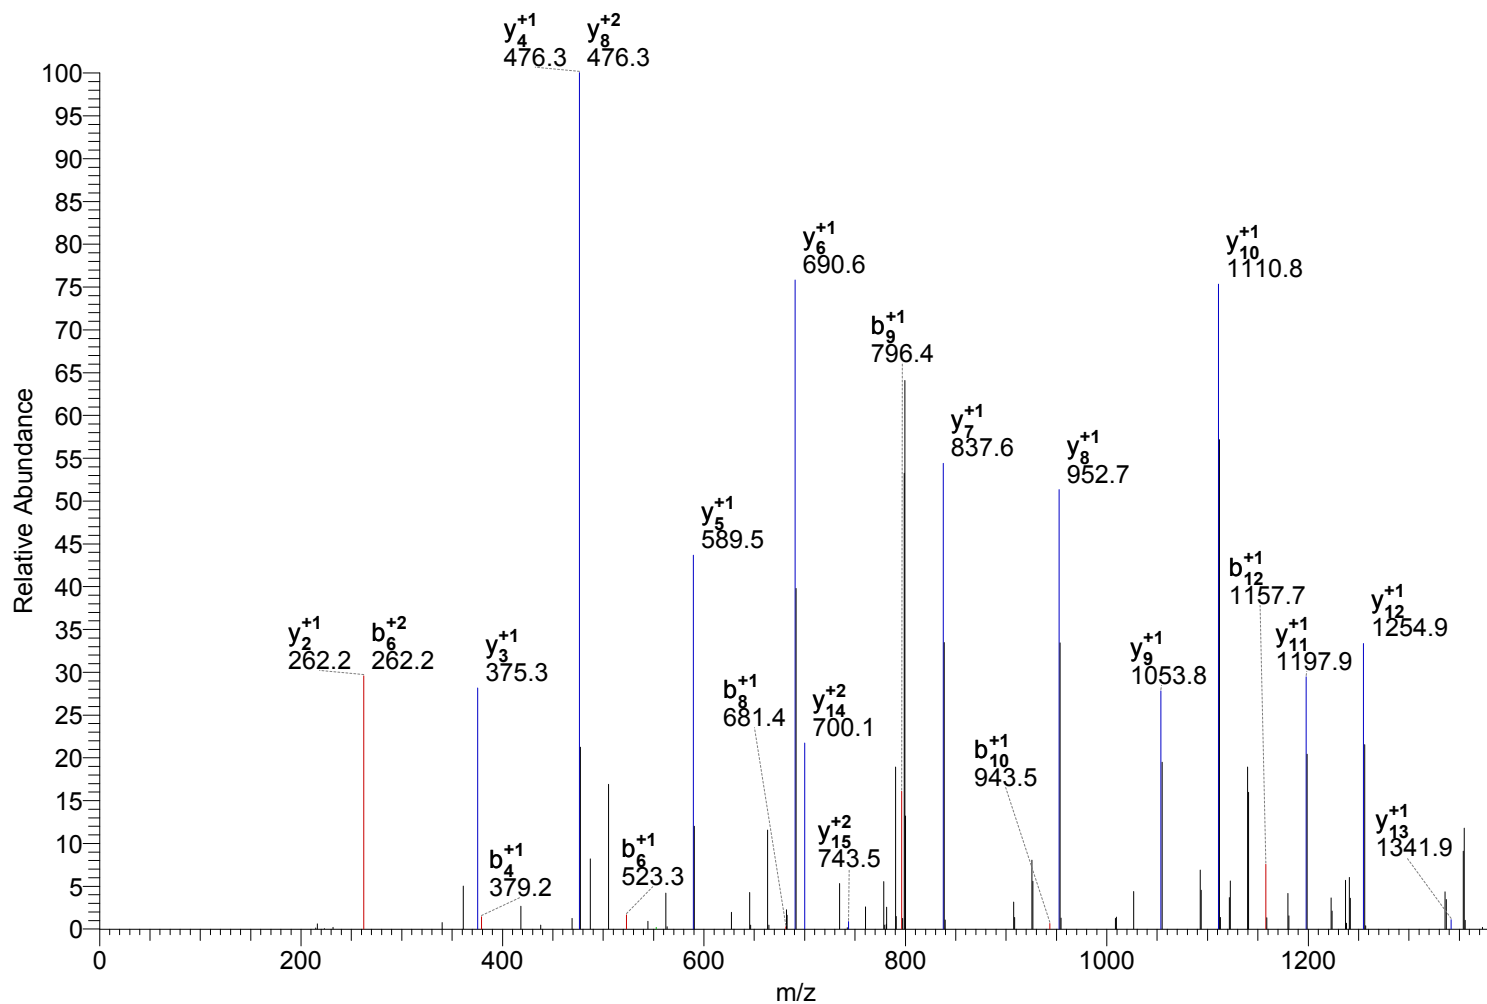

DTA for scans: 19287468-1  
Precursor ion: 676.85  
Mass type: mono  
Mod's: (M\* +15.99492) C=161.01468

Ion series for charge: +1

| AA | A ions        | B ions         | B* ions | Bo ions | C ions | Y ions         | Y* ions | Yo ions | Z ions |
|----|---------------|----------------|---------|---------|--------|----------------|---------|---------|--------|
| N  | 87.06         | 115.05         |         |         |        |                |         |         |        |
| T  | 188.10        | <b>216.10</b>  |         |         |        | 1238.66        |         |         |        |
| L  | <b>301.19</b> | <b>329.18</b>  |         |         |        | <b>1137.61</b> |         |         |        |
| Y  | <b>464.25</b> | <b>492.25</b>  |         |         |        | <b>1024.52</b> |         |         |        |
| L  | <b>577.33</b> | <b>605.33</b>  |         |         |        | <b>861.46</b>  |         |         |        |
| Q  | 705.39        | <b>733.39</b>  |         |         |        | <b>748.38</b>  |         |         |        |
| M  | 836.43        | <b>864.43</b>  |         |         |        | <b>620.32</b>  |         |         |        |
| N  | 950.48        | <b>978.47</b>  |         |         |        | <b>489.28</b>  |         |         |        |
| S  | 1037.51       | <b>1065.50</b> |         |         |        | <b>375.24</b>  |         |         |        |
| L  | 1150.59       | <b>1178.59</b> |         |         |        | <b>288.20</b>  |         |         |        |
| R  |               |                |         |         |        | 175.12         |         |         |        |



#19287468-1 NL: 1.01E5





---

| Reference                          |                      |         |   | P      | Score | Coverage | Accession |     |       |       |
|------------------------------------|----------------------|---------|---|--------|-------|----------|-----------|-----|-------|-------|
| Scan(s)                            | Sequence             | MH+     | z | P      | XC    | DeltaCn  | Sp        | RSp | Ions  | Count |
| IPI:IPI00784985.1 TREMBL:Q6PJF2 Ta |                      |         |   | 1e-006 | 20.2  | 0.0      | 0         |     |       |       |
| 19287468 - 1                       | R.FSGSGSGTDFTLTISR.L | 1632.79 | 2 | 1e-006 | 3.219 | 0.589    | 674.9     | 1   | 19/45 | 14    |
| 19287468 - 1                       | K.SGTASVVCLLNNFYPR.E | 1798.88 | 2 | 5e-005 | 3.485 | 0.433    | 766.8     | 1   | 17/45 | 7     |

2 of 2 peptide matches reported, 0 removed due to filtering

DTA for scans: 19287468-1  
Precursor ion: 816.90  
Mass type: mono  
Mod's: (M\* +15.99492) C=161.01468

Ion series for charge: +1

| AA | A ions        | B ions         | B* ions | Bo ions | C ions | Y ions         | Y* ions | Yo ions | Z ions |
|----|---------------|----------------|---------|---------|--------|----------------|---------|---------|--------|
| F  | 120.08        | 148.08         |         |         |        |                |         |         |        |
| S  | 207.11        | 235.11         |         |         |        | 1485.72        |         |         |        |
| G  | 264.13        | 292.13         |         |         |        | 1398.69        |         |         |        |
| S  | 351.17        | <b>379.16</b>  |         |         |        | <b>1341.66</b> |         |         |        |
| G  | 408.19        | 436.18         |         |         |        | <b>1254.63</b> |         |         |        |
| S  | 495.22        | <b>523.21</b>  |         |         |        | <b>1197.61</b> |         |         |        |
| G  | <b>552.24</b> | 580.24         |         |         |        | <b>1110.58</b> |         |         |        |
| T  | 653.29        | <b>681.28</b>  |         |         |        | <b>1053.56</b> |         |         |        |
| D  | 768.32        | <b>796.31</b>  |         |         |        | <b>952.51</b>  |         |         |        |
| F  | 915.38        | <b>943.38</b>  |         |         |        | <b>837.48</b>  |         |         |        |
| T  | 1016.43       | 1044.43        |         |         |        | <b>690.41</b>  |         |         |        |
| L  | 1129.52       | <b>1157.51</b> |         |         |        | <b>589.37</b>  |         |         |        |
| T  | 1230.56       | 1258.56        |         |         |        | <b>476.28</b>  |         |         |        |
| I  | 1343.65       | 1371.64        |         |         |        | <b>375.24</b>  |         |         |        |
| S  | 1430.68       | 1458.67        |         |         |        | <b>262.15</b>  |         |         |        |
| R  |               |                |         |         |        | 175.12         |         |         |        |

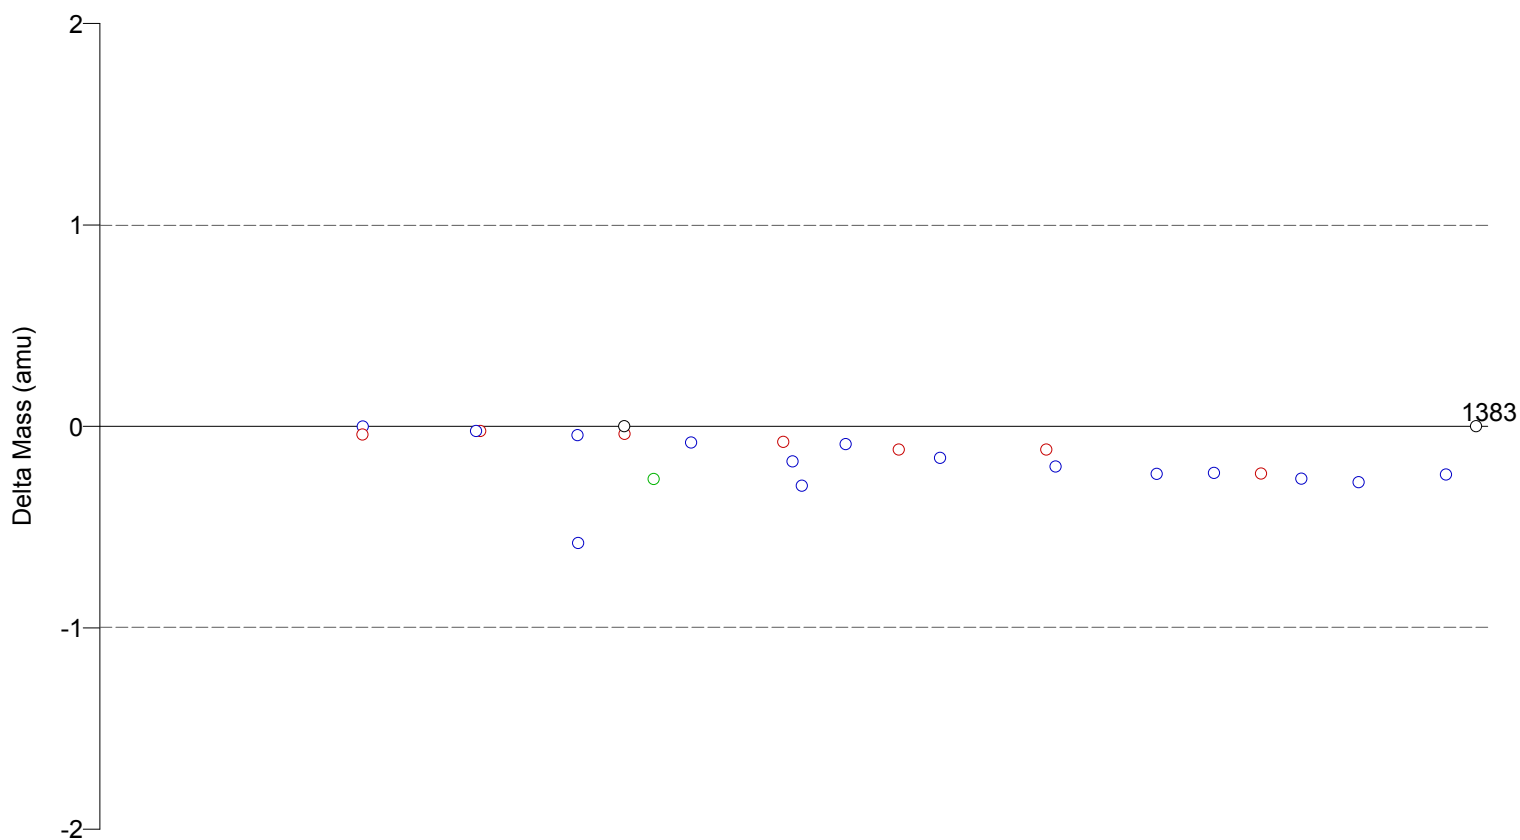

#19287468-1 NL: 6.55E4

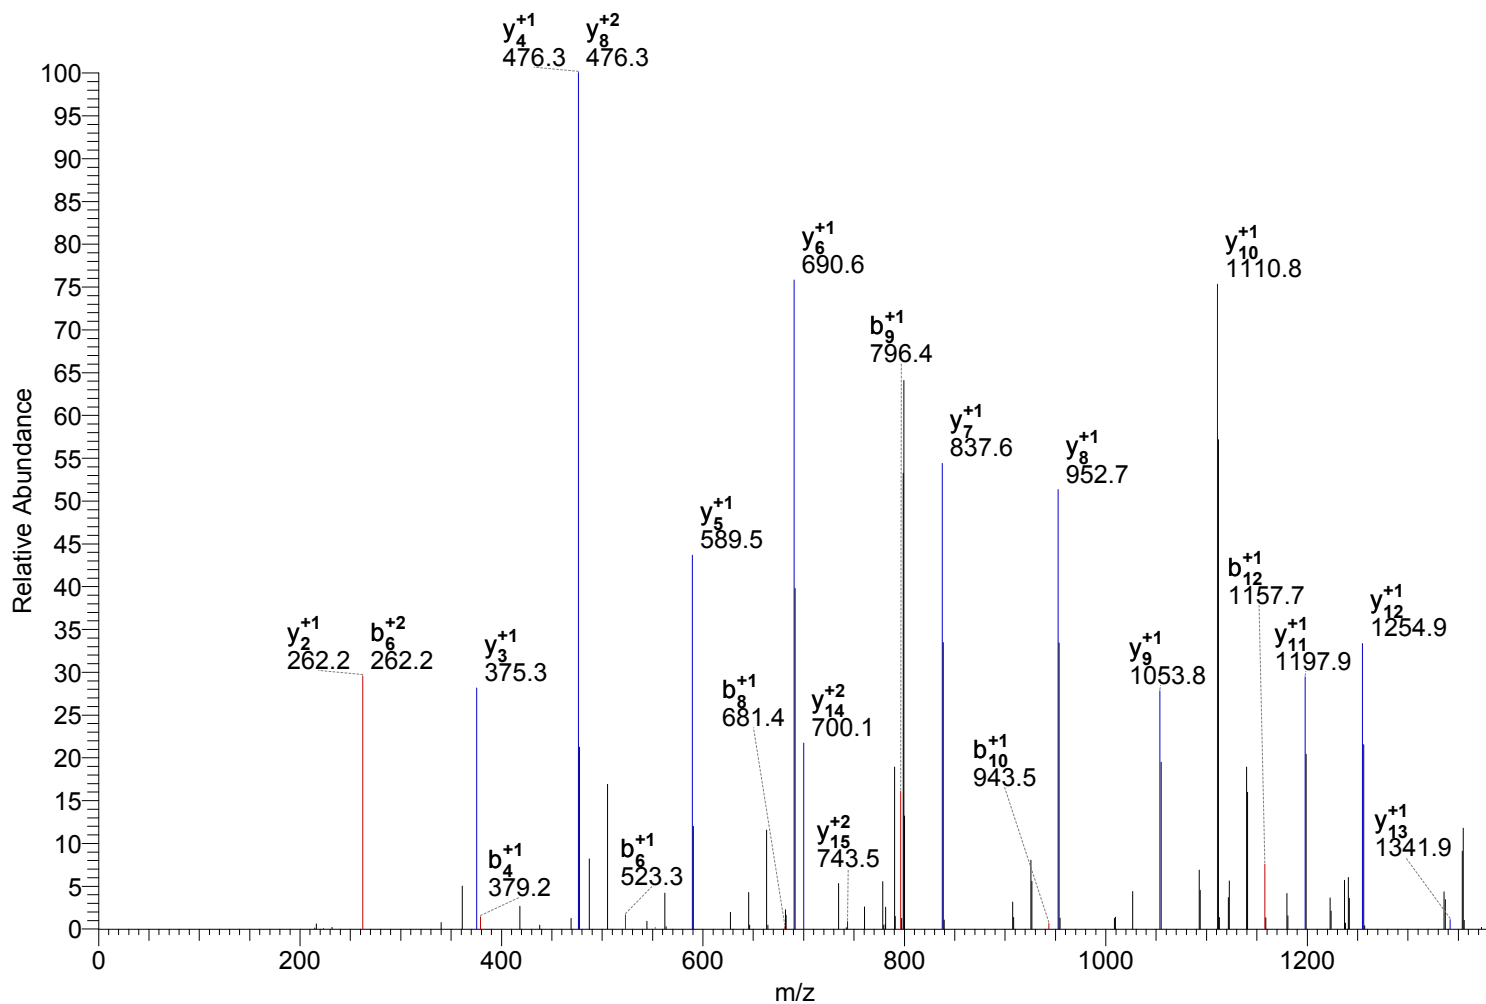

DTA for scans: 19287468-1  
Precursor ion: 899.94  
Mass type: mono  
Mod's: (M\* +15.99492) C=161.01468

Ion series for charge: +1

| AA | A ions  | B ions         | B* ions | Bo ions | C ions | Y ions         | Y* ions | Yo ions | Z ions |
|----|---------|----------------|---------|---------|--------|----------------|---------|---------|--------|
| S  | 60.04   | 88.04          |         |         |        |                |         |         |        |
| G  | 117.07  | 145.06         |         |         |        | 1711.85        |         |         |        |
| T  | 218.11  | 246.11         |         |         |        | 1654.83        |         |         |        |
| A  | 289.15  | 317.15         |         |         |        | 1553.78        |         |         |        |
| S  | 376.18  | 404.18         |         |         |        | 1482.74        |         |         |        |
| V  | 475.25  | <b>503.25</b>  |         |         |        | 1395.71        |         |         |        |
| V  | 574.32  | <b>602.31</b>  |         |         |        | <b>1296.64</b> |         |         |        |
| C  | 735.33  | 763.33         |         |         |        | <b>1197.57</b> |         |         |        |
| L  | 848.42  | <b>876.41</b>  |         |         |        | <b>1036.56</b> |         |         |        |
| L  | 961.50  | <b>989.50</b>  |         |         |        | <b>923.47</b>  |         |         |        |
| N  | 1075.55 | <b>1103.54</b> |         |         |        | <b>810.39</b>  |         |         |        |
| N  | 1189.59 | <b>1217.58</b> |         |         |        | <b>696.35</b>  |         |         |        |
| F  | 1336.66 | <b>1364.65</b> |         |         |        | <b>582.30</b>  |         |         |        |
| Y  | 1499.72 | <b>1527.71</b> |         |         |        | <b>435.24</b>  |         |         |        |
| P  | 1596.77 | 1624.77        |         |         |        | <b>272.17</b>  |         |         |        |
| R  |         |                |         |         |        | 175.12         |         |         |        |

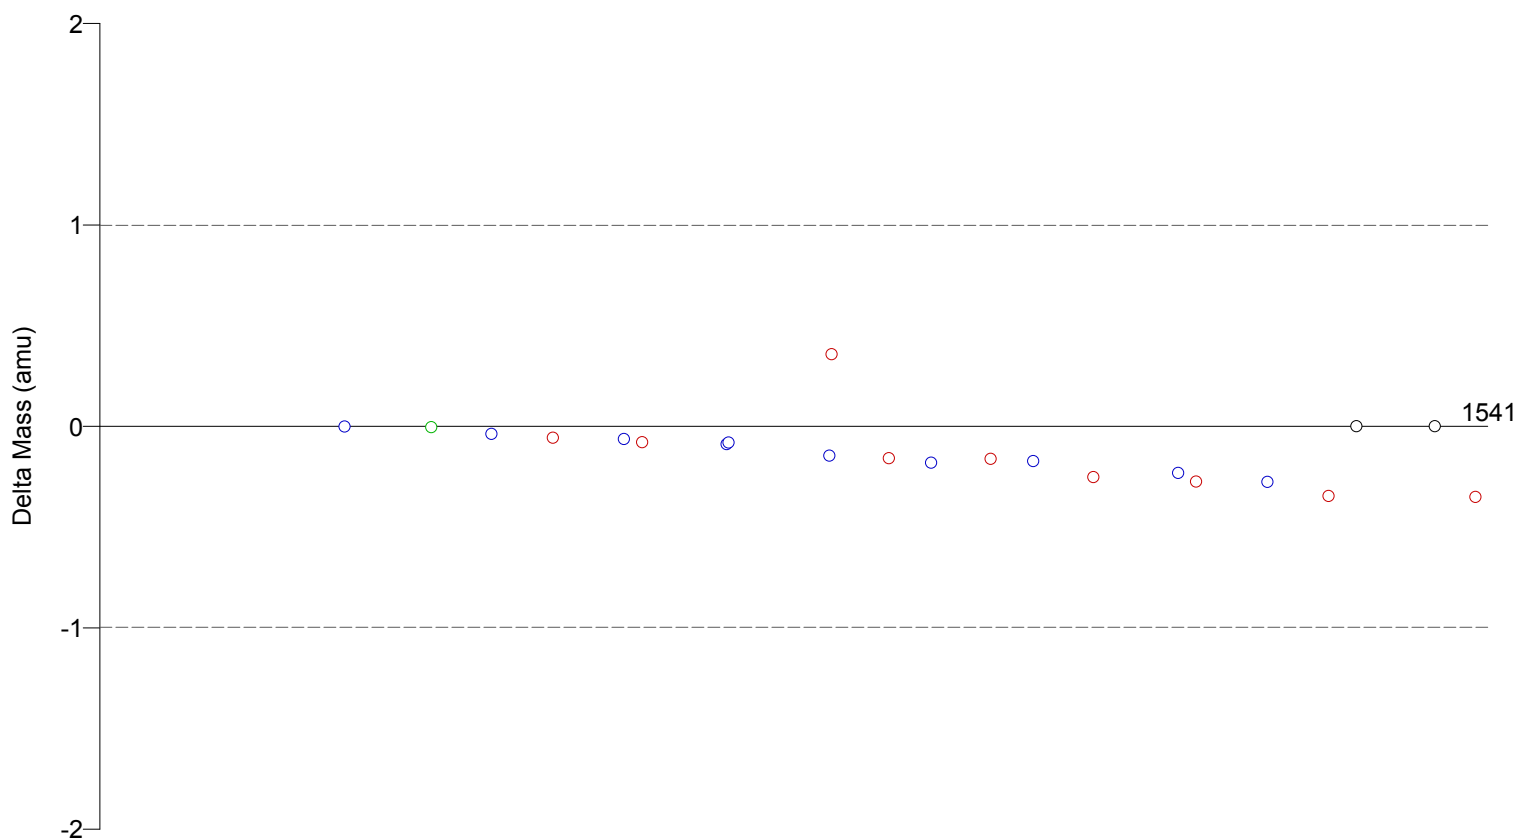

#19287468-1 NL: 2.53E6

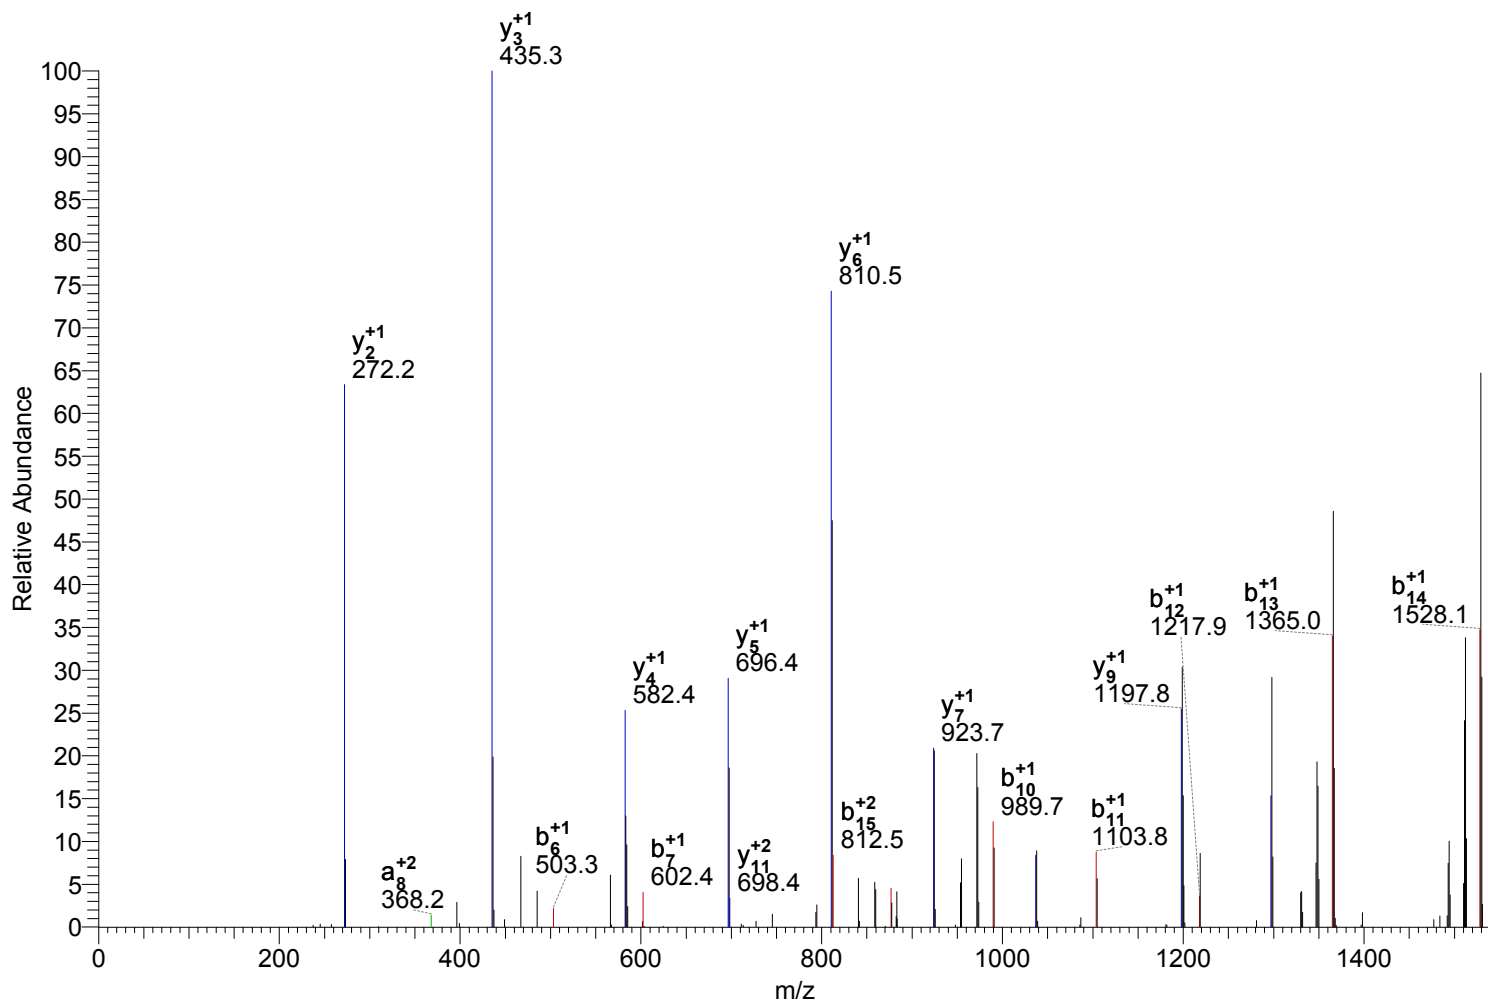

---

| Reference                          |                      |         |   | P      | Score | Coverage | Accession |     |       |       |
|------------------------------------|----------------------|---------|---|--------|-------|----------|-----------|-----|-------|-------|
| Scan(s)                            | Sequence             | MH+     | z | P      | XC    | DeltaCn  | Sp        | RSp | Ions  | Count |
| IPI:IPI00889156.1 TREMBL:Q15537;Q6 |                      |         |   | 1e-006 | 20.2  | 0.0      | 0         |     |       |       |
| 19287468 - 1                       | R.FSGSGSGTDFTLTISR.L | 1632.79 | 2 | 1e-006 | 3.219 | 0.589    | 674.9     | 1   | 19/45 | 14    |
| 19287468 - 1                       | K.SGTASVVCLLNNFYPR.E | 1798.88 | 2 | 5e-005 | 3.485 | 0.433    | 766.8     | 1   | 17/45 | 7     |

2 of 2 peptide matches reported, 0 removed due to filtering

DTA for scans: 19287468-1  
Precursor ion: 816.90  
Mass type: mono  
Mod's: (M\* +15.99492) C=161.01468

Ion series for charge: +1

| AA | A ions        | B ions         | B* ions | Bo ions | C ions | Y ions         | Y* ions | Yo ions | Z ions |
|----|---------------|----------------|---------|---------|--------|----------------|---------|---------|--------|
| F  | 120.08        | 148.08         |         |         |        |                |         |         |        |
| S  | 207.11        | 235.11         |         |         |        | 1485.72        |         |         |        |
| G  | 264.13        | 292.13         |         |         |        | 1398.69        |         |         |        |
| S  | 351.17        | <b>379.16</b>  |         |         |        | <b>1341.66</b> |         |         |        |
| G  | 408.19        | 436.18         |         |         |        | <b>1254.63</b> |         |         |        |
| S  | 495.22        | <b>523.21</b>  |         |         |        | <b>1197.61</b> |         |         |        |
| G  | <b>552.24</b> | 580.24         |         |         |        | <b>1110.58</b> |         |         |        |
| T  | 653.29        | <b>681.28</b>  |         |         |        | <b>1053.56</b> |         |         |        |
| D  | 768.32        | <b>796.31</b>  |         |         |        | <b>952.51</b>  |         |         |        |
| F  | 915.38        | <b>943.38</b>  |         |         |        | <b>837.48</b>  |         |         |        |
| T  | 1016.43       | 1044.43        |         |         |        | <b>690.41</b>  |         |         |        |
| L  | 1129.52       | <b>1157.51</b> |         |         |        | <b>589.37</b>  |         |         |        |
| T  | 1230.56       | 1258.56        |         |         |        | <b>476.28</b>  |         |         |        |
| I  | 1343.65       | 1371.64        |         |         |        | <b>375.24</b>  |         |         |        |
| S  | 1430.68       | 1458.67        |         |         |        | <b>262.15</b>  |         |         |        |
| R  |               |                |         |         |        | 175.12         |         |         |        |

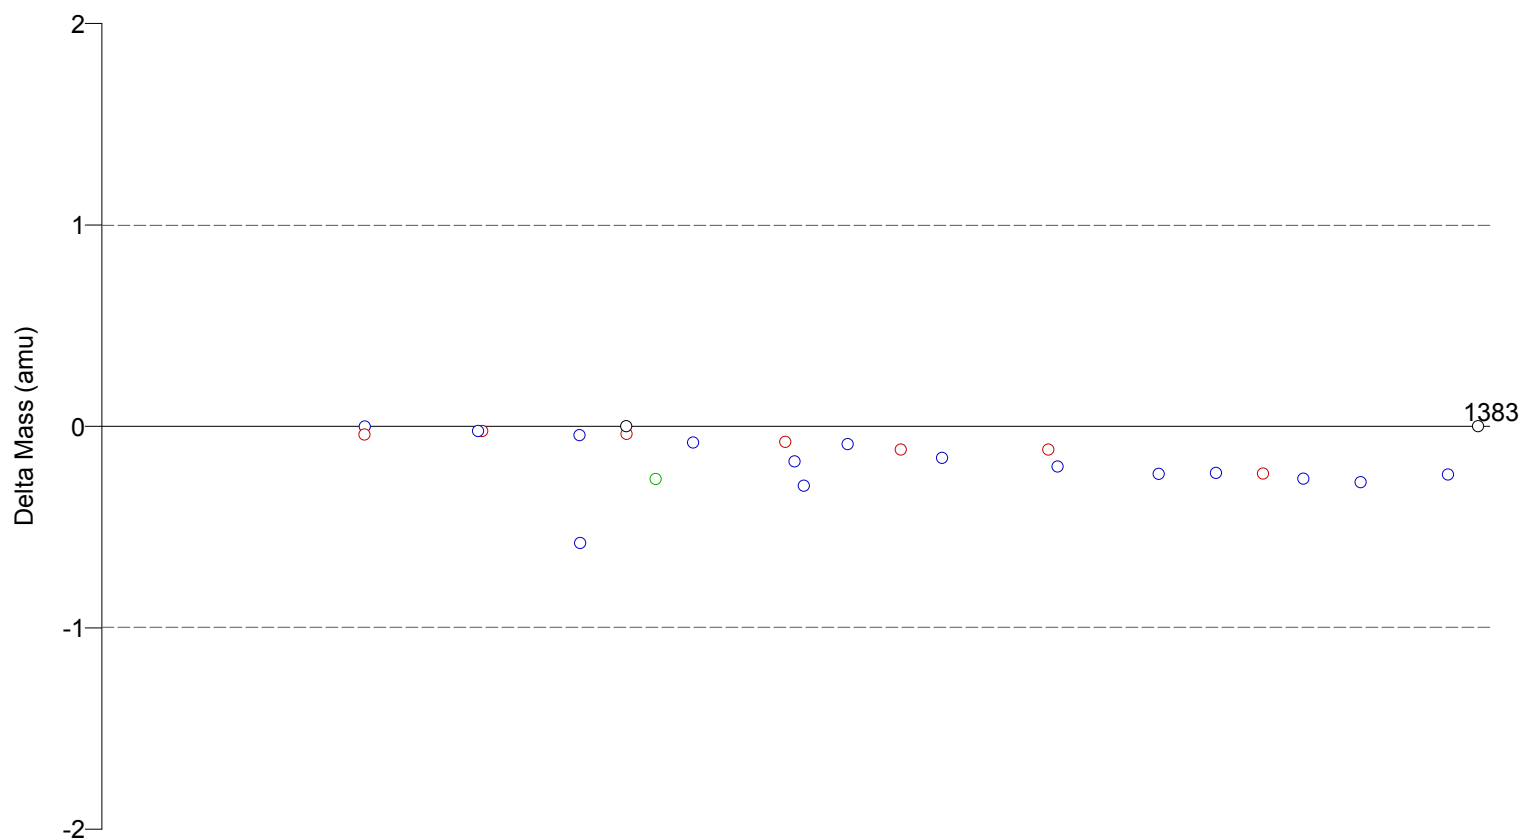

#19287468-1 NL: 6.55E4





DTA for scans: 19287468-1  
Precursor ion: 899.94  
Mass type: mono  
Mod's: (M\* +15.99492) C=161.01468

Ion series for charge: +1

| AA | A ions  | B ions         | B* ions | Bo ions | C ions | Y ions         | Y* ions | Yo ions | Z ions |
|----|---------|----------------|---------|---------|--------|----------------|---------|---------|--------|
| S  | 60.04   | 88.04          |         |         |        |                |         |         |        |
| G  | 117.07  | 145.06         |         |         |        | 1711.85        |         |         |        |
| T  | 218.11  | 246.11         |         |         |        | 1654.83        |         |         |        |
| A  | 289.15  | 317.15         |         |         |        | 1553.78        |         |         |        |
| S  | 376.18  | 404.18         |         |         |        | 1482.74        |         |         |        |
| V  | 475.25  | <b>503.25</b>  |         |         |        | 1395.71        |         |         |        |
| V  | 574.32  | <b>602.31</b>  |         |         |        | <b>1296.64</b> |         |         |        |
| C  | 735.33  | 763.33         |         |         |        | <b>1197.57</b> |         |         |        |
| L  | 848.42  | <b>876.41</b>  |         |         |        | <b>1036.56</b> |         |         |        |
| L  | 961.50  | <b>989.50</b>  |         |         |        | <b>923.47</b>  |         |         |        |
| N  | 1075.55 | <b>1103.54</b> |         |         |        | <b>810.39</b>  |         |         |        |
| N  | 1189.59 | <b>1217.58</b> |         |         |        | <b>696.35</b>  |         |         |        |
| F  | 1336.66 | <b>1364.65</b> |         |         |        | <b>582.30</b>  |         |         |        |
| Y  | 1499.72 | <b>1527.71</b> |         |         |        | <b>435.24</b>  |         |         |        |
| P  | 1596.77 | 1624.77        |         |         |        | <b>272.17</b>  |         |         |        |
| R  |         |                |         |         |        | 175.12         |         |         |        |

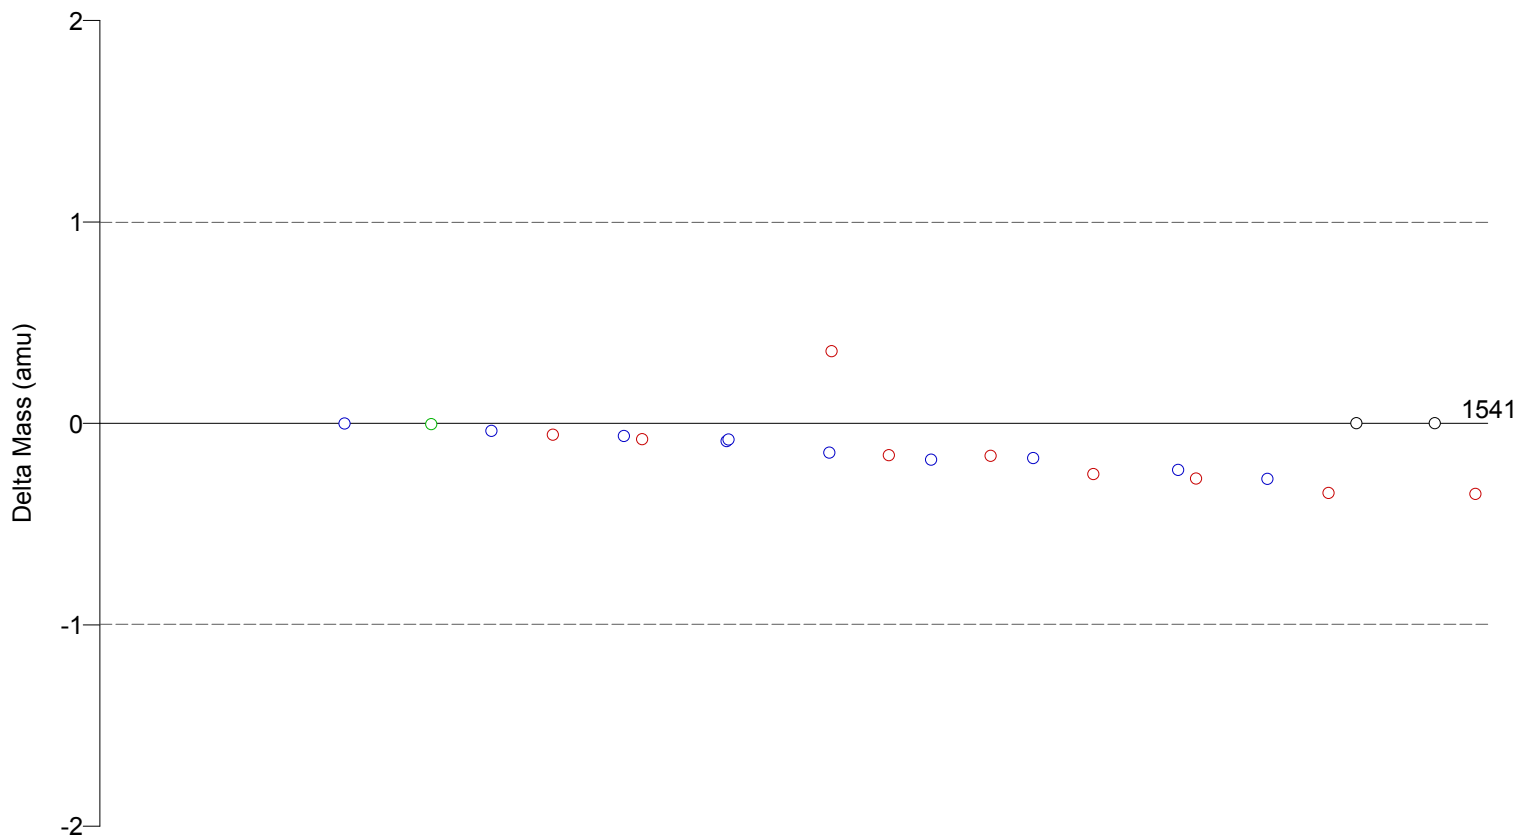

#19287468-1 NL: 2.53E6



---

| Reference                                                      |                     |         |   | P      | Score | Coverage | Accession |     |       |       |  |
|----------------------------------------------------------------|---------------------|---------|---|--------|-------|----------|-----------|-----|-------|-------|--|
| Scan(s)                                                        | Sequence            | MH+     | z | P      | XC    | DeltaCn  | Sp        | RSp | Ions  | Count |  |
| IPI:IPI00030205.3 SWISS-PROT:P18135 ENSEMBL:ENSP00000374790 VE |                     |         |   | 1e-006 | 10.2  | 0.0      | 0         |     |       |       |  |
| 19287468 - 1                                                   | R.FSGSGSGDFTLTISR.L | 1632.79 | 2 | 1e-006 | 3.219 | 0.589    | 674.9     | 1   | 19/45 | 14    |  |

1 of 1 peptide matches reported, 0 removed due to filtering

DTA for scans: 19287468-1  
Precursor ion: 816.90  
Mass type: mono  
Mod's: (M\* +15.99492) C=161.01468

Ion series for charge: +1

| AA | A ions        | B ions         | B* ions | Bo ions | C ions | Y ions         | Y* ions | Yo ions | Z ions |
|----|---------------|----------------|---------|---------|--------|----------------|---------|---------|--------|
| F  | 120.08        | 148.08         |         |         |        |                |         |         |        |
| S  | 207.11        | 235.11         |         |         |        | 1485.72        |         |         |        |
| G  | 264.13        | 292.13         |         |         |        | 1398.69        |         |         |        |
| S  | 351.17        | <b>379.16</b>  |         |         |        | <b>1341.66</b> |         |         |        |
| G  | 408.19        | 436.18         |         |         |        | <b>1254.63</b> |         |         |        |
| S  | 495.22        | <b>523.21</b>  |         |         |        | <b>1197.61</b> |         |         |        |
| G  | <b>552.24</b> | 580.24         |         |         |        | <b>1110.58</b> |         |         |        |
| T  | 653.29        | <b>681.28</b>  |         |         |        | <b>1053.56</b> |         |         |        |
| D  | 768.32        | <b>796.31</b>  |         |         |        | <b>952.51</b>  |         |         |        |
| F  | 915.38        | <b>943.38</b>  |         |         |        | <b>837.48</b>  |         |         |        |
| T  | 1016.43       | 1044.43        |         |         |        | <b>690.41</b>  |         |         |        |
| L  | 1129.52       | <b>1157.51</b> |         |         |        | <b>589.37</b>  |         |         |        |
| T  | 1230.56       | 1258.56        |         |         |        | <b>476.28</b>  |         |         |        |
| I  | 1343.65       | 1371.64        |         |         |        | <b>375.24</b>  |         |         |        |
| S  | 1430.68       | 1458.67        |         |         |        | <b>262.15</b>  |         |         |        |
| R  |               |                |         |         |        | 175.12         |         |         |        |



#19287468-1 NL: 6.55E4



---

| Reference                          |                     |         |   | P      | Score | Coverage | Accession |     |       |       |
|------------------------------------|---------------------|---------|---|--------|-------|----------|-----------|-----|-------|-------|
| Scan(s)                            | Sequence            | MH+     | z | P      | XC    | DeltaCn  | Sp        | RSp | Ions  | Count |
| IPI:IPI00384576.1 SWISS-PROT:P1813 |                     |         |   | 1e-006 | 10.2  | 0.0      | 0         |     |       |       |
| 19287468 - 1                       | R.FSGSGSGDFTLTISR.L | 1632.79 | 2 | 1e-006 | 3.219 | 0.589    | 674.9     | 1   | 19/45 | 14    |

1 of 1 peptide matches reported, 0 removed due to filtering

DTA for scans: 19287468-1  
Precursor ion: 816.90  
Mass type: mono  
Mod's: (M\* +15.99492) C=161.01468

Ion series for charge: +1

| AA | A ions        | B ions         | B* ions | Bo ions | C ions | Y ions         | Y* ions | Yo ions | Z ions |
|----|---------------|----------------|---------|---------|--------|----------------|---------|---------|--------|
| F  | 120.08        | 148.08         |         |         |        |                |         |         |        |
| S  | 207.11        | 235.11         |         |         |        | 1485.72        |         |         |        |
| G  | 264.13        | 292.13         |         |         |        | 1398.69        |         |         |        |
| S  | 351.17        | <b>379.16</b>  |         |         |        | <b>1341.66</b> |         |         |        |
| G  | 408.19        | 436.18         |         |         |        | <b>1254.63</b> |         |         |        |
| S  | 495.22        | <b>523.21</b>  |         |         |        | <b>1197.61</b> |         |         |        |
| G  | <b>552.24</b> | 580.24         |         |         |        | <b>1110.58</b> |         |         |        |
| T  | 653.29        | <b>681.28</b>  |         |         |        | <b>1053.56</b> |         |         |        |
| D  | 768.32        | <b>796.31</b>  |         |         |        | <b>952.51</b>  |         |         |        |
| F  | 915.38        | <b>943.38</b>  |         |         |        | <b>837.48</b>  |         |         |        |
| T  | 1016.43       | 1044.43        |         |         |        | <b>690.41</b>  |         |         |        |
| L  | 1129.52       | <b>1157.51</b> |         |         |        | <b>589.37</b>  |         |         |        |
| T  | 1230.56       | 1258.56        |         |         |        | <b>476.28</b>  |         |         |        |
| I  | 1343.65       | 1371.64        |         |         |        | <b>375.24</b>  |         |         |        |
| S  | 1430.68       | 1458.67        |         |         |        | <b>262.15</b>  |         |         |        |
| R  |               |                |         |         |        | 175.12         |         |         |        |



#19287468-1 NL: 6.55E4





---

| Reference                          |                     |         |   | P      | Score | Coverage | Accession |     |       |       |
|------------------------------------|---------------------|---------|---|--------|-------|----------|-----------|-----|-------|-------|
| Scan(s)                            | Sequence            | MH+     | z | P      | XC    | DeltaCn  | Sp        | RSp | Ions  | Count |
| IPI:IPI00385252.1 SWISS-PROT:P0420 |                     |         |   | 1e-006 | 10.2  | 0.0      | 0         |     |       |       |
| 19287468 - 1                       | R.FSGSGSGTDFTLISR.L | 1632.79 | 2 | 1e-006 | 3.219 | 0.589    | 674.9     | 1   | 19/45 | 14    |

1 of 1 peptide matches reported, 0 removed due to filtering

DTA for scans: 19287468-1  
Precursor ion: 816.90  
Mass type: mono  
Mod's: (M\* +15.99492) C=161.01468

Ion series for charge: +1

| AA | A ions        | B ions         | B* ions | Bo ions | C ions | Y ions         | Y* ions | Yo ions | Z ions |
|----|---------------|----------------|---------|---------|--------|----------------|---------|---------|--------|
| F  | 120.08        | 148.08         |         |         |        |                |         |         |        |
| S  | 207.11        | 235.11         |         |         |        | 1485.72        |         |         |        |
| G  | 264.13        | 292.13         |         |         |        | 1398.69        |         |         |        |
| S  | 351.17        | <b>379.16</b>  |         |         |        | <b>1341.66</b> |         |         |        |
| G  | 408.19        | 436.18         |         |         |        | <b>1254.63</b> |         |         |        |
| S  | 495.22        | <b>523.21</b>  |         |         |        | <b>1197.61</b> |         |         |        |
| G  | <b>552.24</b> | 580.24         |         |         |        | <b>1110.58</b> |         |         |        |
| T  | 653.29        | <b>681.28</b>  |         |         |        | <b>1053.56</b> |         |         |        |
| D  | 768.32        | <b>796.31</b>  |         |         |        | <b>952.51</b>  |         |         |        |
| F  | 915.38        | <b>943.38</b>  |         |         |        | <b>837.48</b>  |         |         |        |
| T  | 1016.43       | 1044.43        |         |         |        | <b>690.41</b>  |         |         |        |
| L  | 1129.52       | <b>1157.51</b> |         |         |        | <b>589.37</b>  |         |         |        |
| T  | 1230.56       | 1258.56        |         |         |        | <b>476.28</b>  |         |         |        |
| I  | 1343.65       | 1371.64        |         |         |        | <b>375.24</b>  |         |         |        |
| S  | 1430.68       | 1458.67        |         |         |        | <b>262.15</b>  |         |         |        |
| R  |               |                |         |         |        | 175.12         |         |         |        |



#19287468-1 NL: 6.55E4



---

| Reference                          |                     |         |   | P      | Score | Coverage | Accession |     |       |       |
|------------------------------------|---------------------|---------|---|--------|-------|----------|-----------|-----|-------|-------|
| Scan(s)                            | Sequence            | MH+     | z | P      | XC    | DeltaCn  | Sp        | RSp | Ions  | Count |
| IPI:IPI00387115.1 SWISS-PROT:P0162 |                     |         |   | 1e-006 | 10.2  | 0.0      | 0         |     |       |       |
| 19287468 - 1                       | R.FSGSGSGDFTLTISR.L | 1632.79 | 2 | 1e-006 | 3.219 | 0.589    | 674.9     | 1   | 19/45 | 14    |

1 of 1 peptide matches reported, 0 removed due to filtering

DTA for scans: 19287468-1  
Precursor ion: 816.90  
Mass type: mono  
Mod's: (M\* +15.99492) C=161.01468

Ion series for charge: +1

| AA | A ions        | B ions         | B* ions | Bo ions | C ions | Y ions         | Y* ions | Yo ions | Z ions |
|----|---------------|----------------|---------|---------|--------|----------------|---------|---------|--------|
| F  | 120.08        | 148.08         |         |         |        |                |         |         |        |
| S  | 207.11        | 235.11         |         |         |        | 1485.72        |         |         |        |
| G  | 264.13        | 292.13         |         |         |        | 1398.69        |         |         |        |
| S  | 351.17        | <b>379.16</b>  |         |         |        | <b>1341.66</b> |         |         |        |
| G  | 408.19        | 436.18         |         |         |        | <b>1254.63</b> |         |         |        |
| S  | 495.22        | <b>523.21</b>  |         |         |        | <b>1197.61</b> |         |         |        |
| G  | <b>552.24</b> | 580.24         |         |         |        | <b>1110.58</b> |         |         |        |
| T  | 653.29        | <b>681.28</b>  |         |         |        | <b>1053.56</b> |         |         |        |
| D  | 768.32        | <b>796.31</b>  |         |         |        | <b>952.51</b>  |         |         |        |
| F  | 915.38        | <b>943.38</b>  |         |         |        | <b>837.48</b>  |         |         |        |
| T  | 1016.43       | 1044.43        |         |         |        | <b>690.41</b>  |         |         |        |
| L  | 1129.52       | <b>1157.51</b> |         |         |        | <b>589.37</b>  |         |         |        |
| T  | 1230.56       | 1258.56        |         |         |        | <b>476.28</b>  |         |         |        |
| I  | 1343.65       | 1371.64        |         |         |        | <b>375.24</b>  |         |         |        |
| S  | 1430.68       | 1458.67        |         |         |        | <b>262.15</b>  |         |         |        |
| R  |               |                |         |         |        | 175.12         |         |         |        |



#19287468-1 NL: 6.55E4



---

| Reference                          |                     |         |   | P      | Score | Coverage | Accession |     |       |       |
|------------------------------------|---------------------|---------|---|--------|-------|----------|-----------|-----|-------|-------|
| Scan(s)                            | Sequence            | MH+     | z | P      | XC    | DeltaCn  | Sp        | RSp | Ions  | Count |
| IPI:IPI00387117.5 SWISS-PROT:P0162 |                     |         |   | 1e-006 | 10.2  | 0.0      | 0         |     |       |       |
| 19287468 - 1                       | R.FSGSGSGDFTLTISR.L | 1632.79 | 2 | 1e-006 | 3.219 | 0.589    | 674.9     | 1   | 19/45 | 14    |

1 of 1 peptide matches reported, 0 removed due to filtering

DTA for scans: 19287468-1  
Precursor ion: 816.90  
Mass type: mono  
Mod's: (M\* +15.99492) C=161.01468

Ion series for charge: +1

| AA | A ions        | B ions         | B* ions | Bo ions | C ions | Y ions         | Y* ions | Yo ions | Z ions |
|----|---------------|----------------|---------|---------|--------|----------------|---------|---------|--------|
| F  | 120.08        | 148.08         |         |         |        |                |         |         |        |
| S  | 207.11        | 235.11         |         |         |        | 1485.72        |         |         |        |
| G  | 264.13        | 292.13         |         |         |        | 1398.69        |         |         |        |
| S  | 351.17        | <b>379.16</b>  |         |         |        | <b>1341.66</b> |         |         |        |
| G  | 408.19        | 436.18         |         |         |        | <b>1254.63</b> |         |         |        |
| S  | 495.22        | <b>523.21</b>  |         |         |        | <b>1197.61</b> |         |         |        |
| G  | <b>552.24</b> | 580.24         |         |         |        | <b>1110.58</b> |         |         |        |
| T  | 653.29        | <b>681.28</b>  |         |         |        | <b>1053.56</b> |         |         |        |
| D  | 768.32        | <b>796.31</b>  |         |         |        | <b>952.51</b>  |         |         |        |
| F  | 915.38        | <b>943.38</b>  |         |         |        | <b>837.48</b>  |         |         |        |
| T  | 1016.43       | 1044.43        |         |         |        | <b>690.41</b>  |         |         |        |
| L  | 1129.52       | <b>1157.51</b> |         |         |        | <b>589.37</b>  |         |         |        |
| T  | 1230.56       | 1258.56        |         |         |        | <b>476.28</b>  |         |         |        |
| I  | 1343.65       | 1371.64        |         |         |        | <b>375.24</b>  |         |         |        |
| S  | 1430.68       | 1458.67        |         |         |        | <b>262.15</b>  |         |         |        |
| R  |               |                |         |         |        | 175.12         |         |         |        |





#19287468-1 NL: 6.55E4



---

| Reference                          |                     |         |   | P      | Score | Coverage | Accession |     |       |       |
|------------------------------------|---------------------|---------|---|--------|-------|----------|-----------|-----|-------|-------|
| Scan(s)                            | Sequence            | MH+     | z | P      | XC    | DeltaCn  | Sp        | RSp | Ions  | Count |
| IPI:IPI00387118.1 SWISS-PROT:P0162 |                     |         |   | 1e-006 | 10.2  | 0.0      | 0         |     |       |       |
| 19287468 - 1                       | R.FSGSGSGDFTLTISR.L | 1632.79 | 2 | 1e-006 | 3.219 | 0.589    | 674.9     | 1   | 19/45 | 14    |

1 of 1 peptide matches reported, 0 removed due to filtering

DTA for scans: 19287468-1  
Precursor ion: 816.90  
Mass type: mono  
Mod's: (M\* +15.99492) C=161.01468

Ion series for charge: +1

| AA | A ions        | B ions         | B* ions | Bo ions | C ions | Y ions         | Y* ions | Yo ions | Z ions |
|----|---------------|----------------|---------|---------|--------|----------------|---------|---------|--------|
| F  | 120.08        | 148.08         |         |         |        |                |         |         |        |
| S  | 207.11        | 235.11         |         |         |        | 1485.72        |         |         |        |
| G  | 264.13        | 292.13         |         |         |        | 1398.69        |         |         |        |
| S  | 351.17        | <b>379.16</b>  |         |         |        | <b>1341.66</b> |         |         |        |
| G  | 408.19        | 436.18         |         |         |        | <b>1254.63</b> |         |         |        |
| S  | 495.22        | <b>523.21</b>  |         |         |        | <b>1197.61</b> |         |         |        |
| G  | <b>552.24</b> | 580.24         |         |         |        | <b>1110.58</b> |         |         |        |
| T  | 653.29        | <b>681.28</b>  |         |         |        | <b>1053.56</b> |         |         |        |
| D  | 768.32        | <b>796.31</b>  |         |         |        | <b>952.51</b>  |         |         |        |
| F  | 915.38        | <b>943.38</b>  |         |         |        | <b>837.48</b>  |         |         |        |
| T  | 1016.43       | 1044.43        |         |         |        | <b>690.41</b>  |         |         |        |
| L  | 1129.52       | <b>1157.51</b> |         |         |        | <b>589.37</b>  |         |         |        |
| T  | 1230.56       | 1258.56        |         |         |        | <b>476.28</b>  |         |         |        |
| I  | 1343.65       | 1371.64        |         |         |        | <b>375.24</b>  |         |         |        |
| S  | 1430.68       | 1458.67        |         |         |        | <b>262.15</b>  |         |         |        |
| R  |               |                |         |         |        | 175.12         |         |         |        |



#19287468-1 NL: 6.55E4



---

| Reference                          |                     |         |   | P      | Score | Coverage | Accession |     |       |       |
|------------------------------------|---------------------|---------|---|--------|-------|----------|-----------|-----|-------|-------|
| Scan(s)                            | Sequence            | MH+     | z | P      | XC    | DeltaCn  | Sp        | RSp | Ions  | Count |
| IPI:IPI00827510.1 TREMBL:A2IPI5 Ta |                     |         |   | 1e-006 | 10.2  | 0.0      | 0         |     |       |       |
| 19287468 - 1                       | R.FSGSGSGDFTLTISR.L | 1632.79 | 2 | 1e-006 | 3.219 | 0.589    | 674.9     | 1   | 19/45 | 14    |

1 of 1 peptide matches reported, 0 removed due to filtering

DTA for scans: 19287468-1  
Precursor ion: 816.90  
Mass type: mono  
Mod's: (M\* +15.99492) C=161.01468

Ion series for charge: +1

| AA | A ions        | B ions         | B* ions | Bo ions | C ions | Y ions         | Y* ions | Yo ions | Z ions |
|----|---------------|----------------|---------|---------|--------|----------------|---------|---------|--------|
| F  | 120.08        | 148.08         |         |         |        |                |         |         |        |
| S  | 207.11        | 235.11         |         |         |        | 1485.72        |         |         |        |
| G  | 264.13        | 292.13         |         |         |        | 1398.69        |         |         |        |
| S  | 351.17        | <b>379.16</b>  |         |         |        | <b>1341.66</b> |         |         |        |
| G  | 408.19        | 436.18         |         |         |        | <b>1254.63</b> |         |         |        |
| S  | 495.22        | <b>523.21</b>  |         |         |        | <b>1197.61</b> |         |         |        |
| G  | <b>552.24</b> | 580.24         |         |         |        | <b>1110.58</b> |         |         |        |
| T  | 653.29        | <b>681.28</b>  |         |         |        | <b>1053.56</b> |         |         |        |
| D  | 768.32        | <b>796.31</b>  |         |         |        | <b>952.51</b>  |         |         |        |
| F  | 915.38        | <b>943.38</b>  |         |         |        | <b>837.48</b>  |         |         |        |
| T  | 1016.43       | 1044.43        |         |         |        | <b>690.41</b>  |         |         |        |
| L  | 1129.52       | <b>1157.51</b> |         |         |        | <b>589.37</b>  |         |         |        |
| T  | 1230.56       | 1258.56        |         |         |        | <b>476.28</b>  |         |         |        |
| I  | 1343.65       | 1371.64        |         |         |        | <b>375.24</b>  |         |         |        |
| S  | 1430.68       | 1458.67        |         |         |        | <b>262.15</b>  |         |         |        |
| R  |               |                |         |         |        | 175.12         |         |         |        |



#19287468-1 NL: 6.55E4



---

| Reference                          |                     |         |   | P      | Score | Coverage | Accession |     |       |       |
|------------------------------------|---------------------|---------|---|--------|-------|----------|-----------|-----|-------|-------|
| Scan(s)                            | Sequence            | MH+     | z | P      | XC    | DeltaCn  | Sp        | RSp | Ions  | Count |
| IPI:IPI00827560.1 TREMBL:A2IPI2;A2 |                     |         |   | 1e-006 | 10.2  | 0.0      | 0         |     |       |       |
| 19287468 - 1                       | R.FSGSGSGDFTLTISR.L | 1632.79 | 2 | 1e-006 | 3.219 | 0.589    | 674.9     | 1   | 19/45 | 14    |

1 of 1 peptide matches reported, 0 removed due to filtering



DTA for scans: 19287468-1  
Precursor ion: 816.90  
Mass type: mono  
Mod's: (M\* +15.99492) C=161.01468

Ion series for charge: +1

| AA | A ions        | B ions         | B* ions | Bo ions | C ions | Y ions         | Y* ions | Yo ions | Z ions |
|----|---------------|----------------|---------|---------|--------|----------------|---------|---------|--------|
| F  | 120.08        | 148.08         |         |         |        |                |         |         |        |
| S  | 207.11        | 235.11         |         |         |        | 1485.72        |         |         |        |
| G  | 264.13        | 292.13         |         |         |        | 1398.69        |         |         |        |
| S  | 351.17        | <b>379.16</b>  |         |         |        | <b>1341.66</b> |         |         |        |
| G  | 408.19        | 436.18         |         |         |        | <b>1254.63</b> |         |         |        |
| S  | 495.22        | <b>523.21</b>  |         |         |        | <b>1197.61</b> |         |         |        |
| G  | <b>552.24</b> | 580.24         |         |         |        | <b>1110.58</b> |         |         |        |
| T  | 653.29        | <b>681.28</b>  |         |         |        | <b>1053.56</b> |         |         |        |
| D  | 768.32        | <b>796.31</b>  |         |         |        | <b>952.51</b>  |         |         |        |
| F  | 915.38        | <b>943.38</b>  |         |         |        | <b>837.48</b>  |         |         |        |
| T  | 1016.43       | 1044.43        |         |         |        | <b>690.41</b>  |         |         |        |
| L  | 1129.52       | <b>1157.51</b> |         |         |        | <b>589.37</b>  |         |         |        |
| T  | 1230.56       | 1258.56        |         |         |        | <b>476.28</b>  |         |         |        |
| I  | 1343.65       | 1371.64        |         |         |        | <b>375.24</b>  |         |         |        |
| S  | 1430.68       | 1458.67        |         |         |        | <b>262.15</b>  |         |         |        |
| R  |               |                |         |         |        | 175.12         |         |         |        |



#19287468-1 NL: 6.55E4



---

| Reference                          |                     |         |   | P      | Score | Coverage | Accession |     |       |       |
|------------------------------------|---------------------|---------|---|--------|-------|----------|-----------|-----|-------|-------|
| Scan(s)                            | Sequence            | MH+     | z | P      | XC    | DeltaCn  | Sp        | RSp | Ions  | Count |
| IPI:IPI00827637.1 TREMBL:A2NXP9 Ta |                     |         |   | 1e-006 | 10.2  | 0.0      | 0         |     |       |       |
| 19287468 - 1                       | R.FSGSGSGDFTLTISR.L | 1632.79 | 2 | 1e-006 | 3.219 | 0.589    | 674.9     | 1   | 19/45 | 14    |

1 of 1 peptide matches reported, 0 removed due to filtering

DTA for scans: 19287468-1  
Precursor ion: 816.90  
Mass type: mono  
Mod's: (M\* +15.99492) C=161.01468

Ion series for charge: +1

| AA | A ions        | B ions         | B* ions | Bo ions | C ions | Y ions         | Y* ions | Yo ions | Z ions |
|----|---------------|----------------|---------|---------|--------|----------------|---------|---------|--------|
| F  | 120.08        | 148.08         |         |         |        |                |         |         |        |
| S  | 207.11        | 235.11         |         |         |        | 1485.72        |         |         |        |
| G  | 264.13        | 292.13         |         |         |        | 1398.69        |         |         |        |
| S  | 351.17        | <b>379.16</b>  |         |         |        | <b>1341.66</b> |         |         |        |
| G  | 408.19        | 436.18         |         |         |        | <b>1254.63</b> |         |         |        |
| S  | 495.22        | <b>523.21</b>  |         |         |        | <b>1197.61</b> |         |         |        |
| G  | <b>552.24</b> | 580.24         |         |         |        | <b>1110.58</b> |         |         |        |
| T  | 653.29        | <b>681.28</b>  |         |         |        | <b>1053.56</b> |         |         |        |
| D  | 768.32        | <b>796.31</b>  |         |         |        | <b>952.51</b>  |         |         |        |
| F  | 915.38        | <b>943.38</b>  |         |         |        | <b>837.48</b>  |         |         |        |
| T  | 1016.43       | 1044.43        |         |         |        | <b>690.41</b>  |         |         |        |
| L  | 1129.52       | <b>1157.51</b> |         |         |        | <b>589.37</b>  |         |         |        |
| T  | 1230.56       | 1258.56        |         |         |        | <b>476.28</b>  |         |         |        |
| I  | 1343.65       | 1371.64        |         |         |        | <b>375.24</b>  |         |         |        |
| S  | 1430.68       | 1458.67        |         |         |        | <b>262.15</b>  |         |         |        |
| R  |               |                |         |         |        | 175.12         |         |         |        |



#19287468-1 NL: 6.55E4



---

| Reference                          |                     |         |   | P      | Score | Coverage | Accession |     |       |       |
|------------------------------------|---------------------|---------|---|--------|-------|----------|-----------|-----|-------|-------|
| Scan(s)                            | Sequence            | MH+     | z | P      | XC    | DeltaCn  | Sp        | RSp | Ions  | Count |
| IPI:IPI00854644.2 TREMBL:A6NLY3 EN |                     |         |   | 1e-006 | 10.2  | 0.0      | 0         |     |       |       |
| 19287468 - 1                       | R.FSGSGSGDFTLTISR.L | 1632.79 | 2 | 1e-006 | 3.219 | 0.589    | 674.9     | 1   | 19/45 | 14    |

1 of 1 peptide matches reported, 0 removed due to filtering

DTA for scans: 19287468-1  
Precursor ion: 816.90  
Mass type: mono  
Mod's: (M\* +15.99492) C=161.01468

Ion series for charge: +1

| AA | A ions        | B ions         | B* ions | Bo ions | C ions | Y ions         | Y* ions | Yo ions | Z ions |
|----|---------------|----------------|---------|---------|--------|----------------|---------|---------|--------|
| F  | 120.08        | 148.08         |         |         |        |                |         |         |        |
| S  | 207.11        | 235.11         |         |         |        | 1485.72        |         |         |        |
| G  | 264.13        | 292.13         |         |         |        | 1398.69        |         |         |        |
| S  | 351.17        | <b>379.16</b>  |         |         |        | <b>1341.66</b> |         |         |        |
| G  | 408.19        | 436.18         |         |         |        | <b>1254.63</b> |         |         |        |
| S  | 495.22        | <b>523.21</b>  |         |         |        | <b>1197.61</b> |         |         |        |
| G  | <b>552.24</b> | 580.24         |         |         |        | <b>1110.58</b> |         |         |        |
| T  | 653.29        | <b>681.28</b>  |         |         |        | <b>1053.56</b> |         |         |        |
| D  | 768.32        | <b>796.31</b>  |         |         |        | <b>952.51</b>  |         |         |        |
| F  | 915.38        | <b>943.38</b>  |         |         |        | <b>837.48</b>  |         |         |        |
| T  | 1016.43       | 1044.43        |         |         |        | <b>690.41</b>  |         |         |        |
| L  | 1129.52       | <b>1157.51</b> |         |         |        | <b>589.37</b>  |         |         |        |
| T  | 1230.56       | 1258.56        |         |         |        | <b>476.28</b>  |         |         |        |
| I  | 1343.65       | 1371.64        |         |         |        | <b>375.24</b>  |         |         |        |
| S  | 1430.68       | 1458.67        |         |         |        | <b>262.15</b>  |         |         |        |
| R  |               |                |         |         |        | 175.12         |         |         |        |

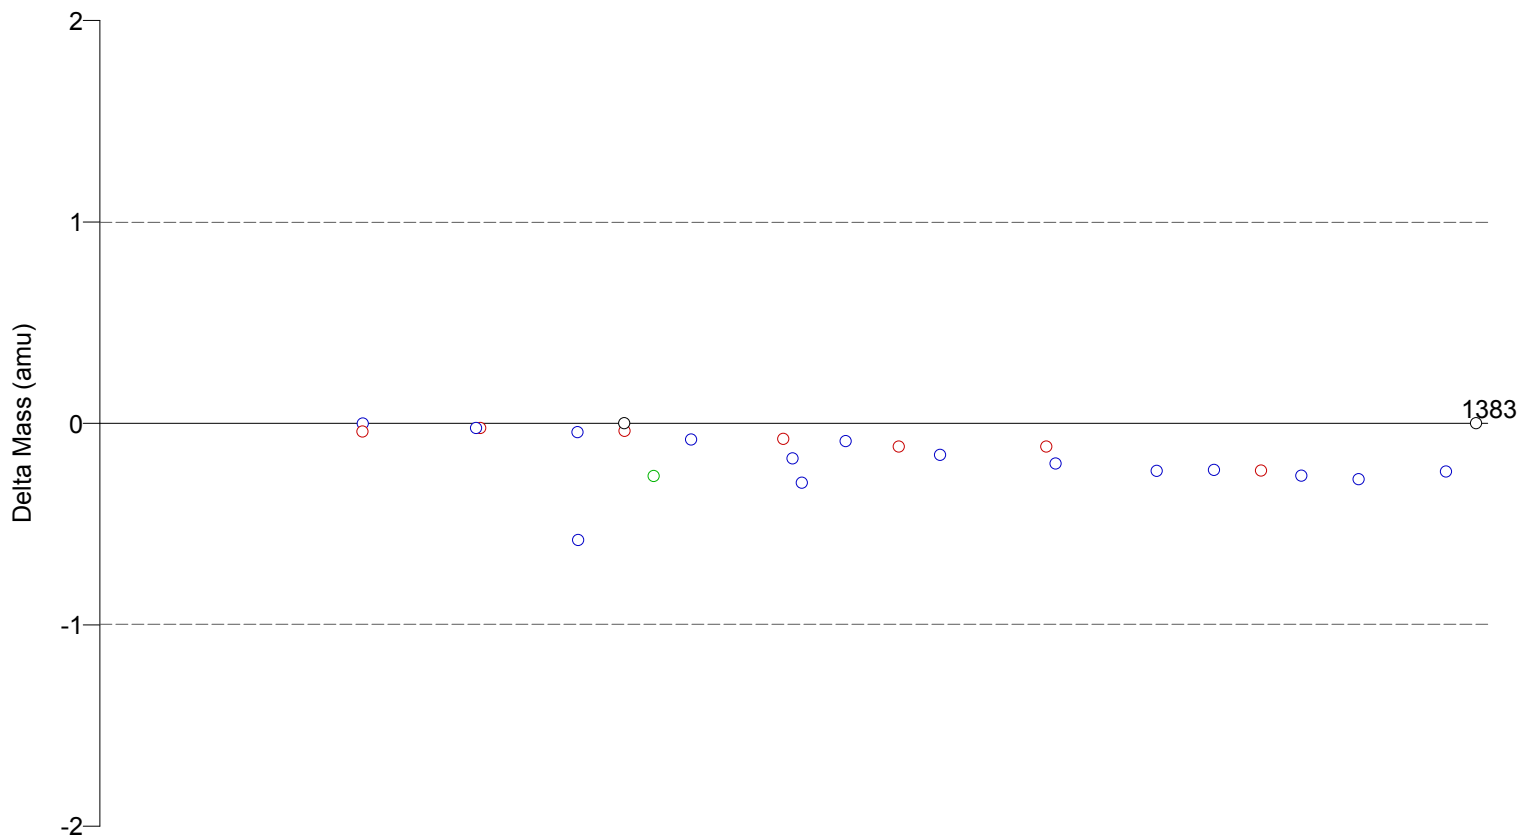

#19287468-1 NL: 6.55E4





---

| Reference                          |                     |         |   | P      | Score | Coverage | Accession |     |       |       |
|------------------------------------|---------------------|---------|---|--------|-------|----------|-----------|-----|-------|-------|
| Scan(s)                            | Sequence            | MH+     | z | P      | XC    | DeltaCn  | Sp        | RSp | Ions  | Count |
| IPI:IPI00885193.1 TREMBL:Q9UL78 Ta |                     |         |   | 1e-006 | 10.2  | 0.0      | 0         |     |       |       |
| 19287468 - 1                       | R.FSGSGSGDFTLTISR.L | 1632.79 | 2 | 1e-006 | 3.219 | 0.589    | 674.9     | 1   | 19/45 | 14    |

1 of 1 peptide matches reported, 0 removed due to filtering

DTA for scans: 19287468-1  
Precursor ion: 816.90  
Mass type: mono  
Mod's: (M\* +15.99492) C=161.01468

Ion series for charge: +1

| AA | A ions        | B ions         | B* ions | Bo ions | C ions | Y ions         | Y* ions | Yo ions | Z ions |
|----|---------------|----------------|---------|---------|--------|----------------|---------|---------|--------|
| F  | 120.08        | 148.08         |         |         |        |                |         |         |        |
| S  | 207.11        | 235.11         |         |         |        | 1485.72        |         |         |        |
| G  | 264.13        | 292.13         |         |         |        | 1398.69        |         |         |        |
| S  | 351.17        | <b>379.16</b>  |         |         |        | <b>1341.66</b> |         |         |        |
| G  | 408.19        | 436.18         |         |         |        | <b>1254.63</b> |         |         |        |
| S  | 495.22        | <b>523.21</b>  |         |         |        | <b>1197.61</b> |         |         |        |
| G  | <b>552.24</b> | 580.24         |         |         |        | <b>1110.58</b> |         |         |        |
| T  | 653.29        | <b>681.28</b>  |         |         |        | <b>1053.56</b> |         |         |        |
| D  | 768.32        | <b>796.31</b>  |         |         |        | <b>952.51</b>  |         |         |        |
| F  | 915.38        | <b>943.38</b>  |         |         |        | <b>837.48</b>  |         |         |        |
| T  | 1016.43       | 1044.43        |         |         |        | <b>690.41</b>  |         |         |        |
| L  | 1129.52       | <b>1157.51</b> |         |         |        | <b>589.37</b>  |         |         |        |
| T  | 1230.56       | 1258.56        |         |         |        | <b>476.28</b>  |         |         |        |
| I  | 1343.65       | 1371.64        |         |         |        | <b>375.24</b>  |         |         |        |
| S  | 1430.68       | 1458.67        |         |         |        | <b>262.15</b>  |         |         |        |
| R  |               |                |         |         |        | 175.12         |         |         |        |



#19287468-1 NL: 6.55E4



---

| Reference                                                      |                  |         |   | P      | Score | Coverage | Accession |     |       |       |
|----------------------------------------------------------------|------------------|---------|---|--------|-------|----------|-----------|-----|-------|-------|
| Scan(s)                                                        | Sequence         | MH+     | z | P      | XC    | DeltaCn  | Sp        | RSp | Ions  | Count |
| IPI:IPI00022426.1 SWISS-PROT:P02760 TREMBL:P78492 ENSEMBL:ENSP |                  |         |   | 1e-006 | 10.2  | 0.0      | 0         |     |       |       |
| 19287468 - 1                                                   | R.AFIQLWAFDAVK.G | 1408.76 | 2 | 1e-006 | 3.585 | 0.380    | 1474.7    | 1   | 21/33 |       |

---

1 of 1 peptide matches reported, 0 removed due to filtering

DTA for scans: 19287468-1  
Precursor ion: 704.88  
Mass type: mono  
Mod's: (M\* +15.99492) C=161.01468

Ion series for charge: +1

| AA | A ions        | B ions         | B* ions | Bo ions | C ions | Y ions         | Y* ions | Yo ions | Z ions |
|----|---------------|----------------|---------|---------|--------|----------------|---------|---------|--------|
| A  | 44.05         | 72.04          |         |         |        |                |         |         |        |
| F  | 191.12        | 219.11         |         |         |        | 1337.73        |         |         |        |
| I  | 304.20        | <b>332.20</b>  |         |         |        | <b>1190.66</b> |         |         |        |
| Q  | <b>432.26</b> | <b>460.26</b>  |         |         |        | <b>1077.57</b> |         |         |        |
| L  | <b>545.34</b> | <b>573.34</b>  |         |         |        | <b>949.51</b>  |         |         |        |
| W  | 731.42        | <b>759.42</b>  |         |         |        | <b>836.43</b>  |         |         |        |
| A  | 802.46        | <b>830.46</b>  |         |         |        | <b>650.35</b>  |         |         |        |
| F  | <b>949.53</b> | <b>977.52</b>  |         |         |        | <b>579.31</b>  |         |         |        |
| D  | 1064.56       | <b>1092.55</b> |         |         |        | <b>432.25</b>  |         |         |        |
| A  | 1135.59       | <b>1163.59</b> |         |         |        | <b>317.22</b>  |         |         |        |
| V  | 1234.66       | <b>1262.66</b> |         |         |        | <b>246.18</b>  |         |         |        |
| K  |               |                |         |         |        | 147.11         |         |         |        |

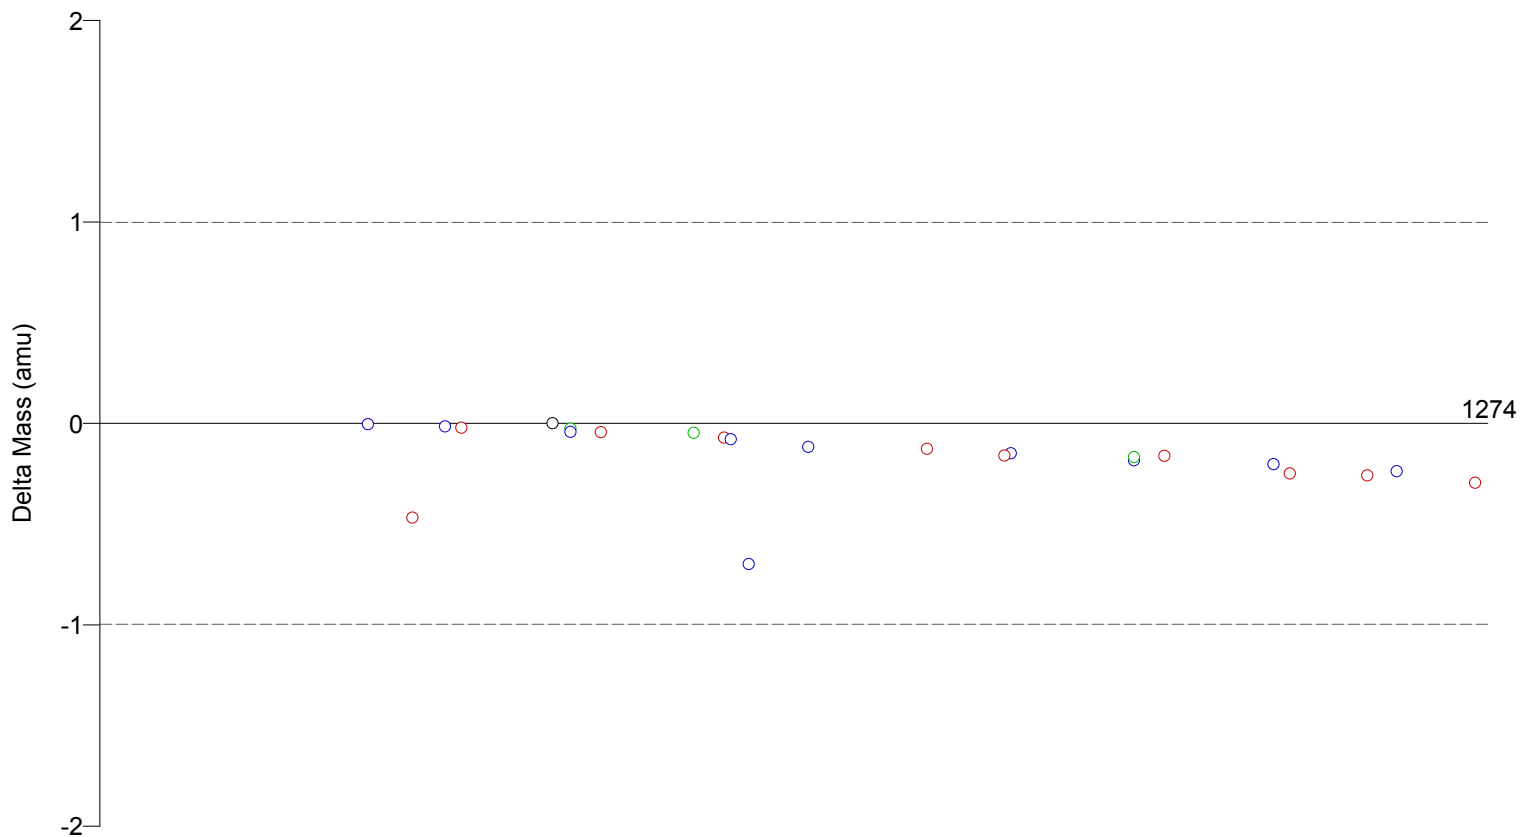

#19287468-1 NL: 6.35E4

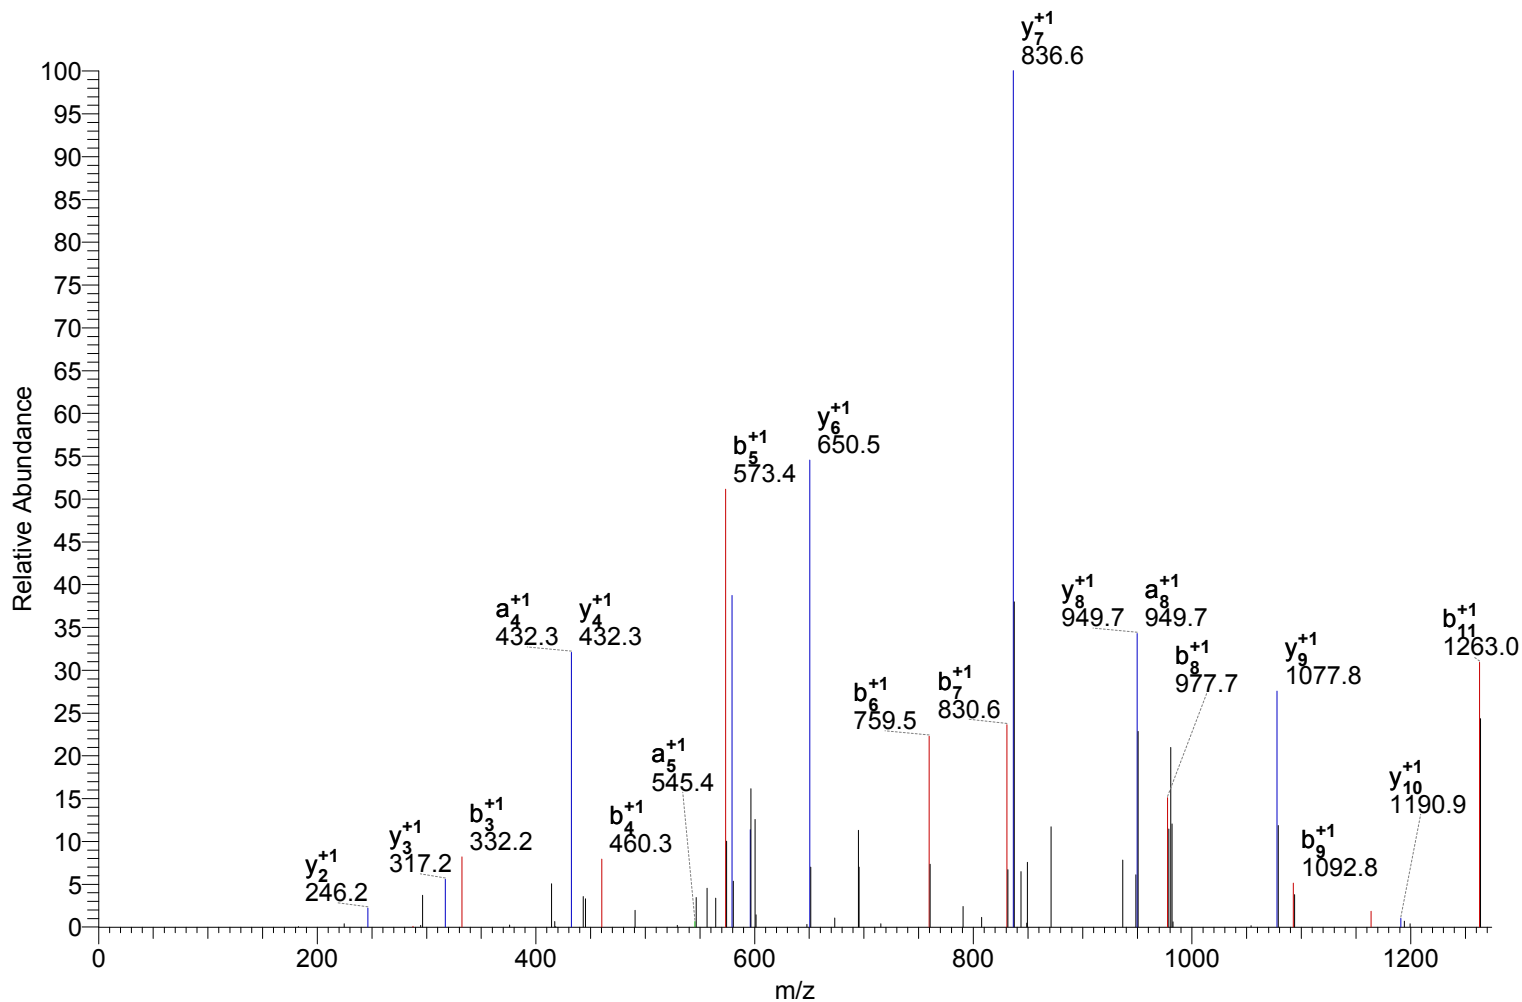

---

| Reference                                                      |                      |         |   | P      | Score | Coverage | Accession |     |       |       |  |
|----------------------------------------------------------------|----------------------|---------|---|--------|-------|----------|-----------|-----|-------|-------|--|
| Scan(s)                                                        | Sequence             | MH+     | z | P      | XC    | DeltaCn  | Sp        | RSp | Ions  | Count |  |
| IPI:IPI00022371.1 SWISS-PROT:P04196 TREMBL:B2R8I2;B9EK35;Q68DR |                      |         |   | 2e-006 | 10.1  | 0.0      | 0         |     |       |       |  |
| 19287468 - 1                                                   | R.ADLFYDVEALDLESPK.N | 1824.89 | 2 | 2e-006 | 2.497 | 0.458    | 790.6     | 1   | 18/45 |       |  |

1 of 1 peptide matches reported, 0 removed due to filtering

DTA for scans: 19287468-1  
Precursor ion: 912.95  
Mass type: mono  
Mod's: (M\* +15.99492) C=161.01468

Ion series for charge: +1

| AA | A ions  | B ions         | B* ions | Bo ions | C ions | Y ions         | Y* ions | Yo ions | Z ions |
|----|---------|----------------|---------|---------|--------|----------------|---------|---------|--------|
| A  | 44.05   | 72.04          |         |         |        |                |         |         |        |
| D  | 159.08  | 187.07         |         |         |        | 1753.85        |         |         |        |
| L  | 272.16  | 300.16         |         |         |        | 1638.83        |         |         |        |
| F  | 419.23  | 447.22         |         |         |        | 1525.74        |         |         |        |
| Y  | 582.29  | 610.29         |         |         |        | <b>1378.67</b> |         |         |        |
| D  | 697.32  | 725.31         |         |         |        | <b>1215.61</b> |         |         |        |
| V  | 796.39  | <b>824.38</b>  |         |         |        | <b>1100.58</b> |         |         |        |
| E  | 925.43  | <b>953.43</b>  |         |         |        | <b>1001.51</b> |         |         |        |
| A  | 996.47  | <b>1024.46</b> |         |         |        | <b>872.47</b>  |         |         |        |
| L  | 1109.55 | <b>1137.55</b> |         |         |        | <b>801.44</b>  |         |         |        |
| D  | 1224.58 | <b>1252.57</b> |         |         |        | <b>688.35</b>  |         |         |        |
| L  | 1337.66 | <b>1365.66</b> |         |         |        | <b>573.32</b>  |         |         |        |
| E  | 1466.70 | <b>1494.70</b> |         |         |        | 460.24         |         |         |        |
| S  | 1553.74 | <b>1581.73</b> |         |         |        | <b>331.20</b>  |         |         |        |
| P  | 1650.79 | 1678.78        |         |         |        | 244.17         |         |         |        |
| K  |         |                |         |         |        | 147.11         |         |         |        |



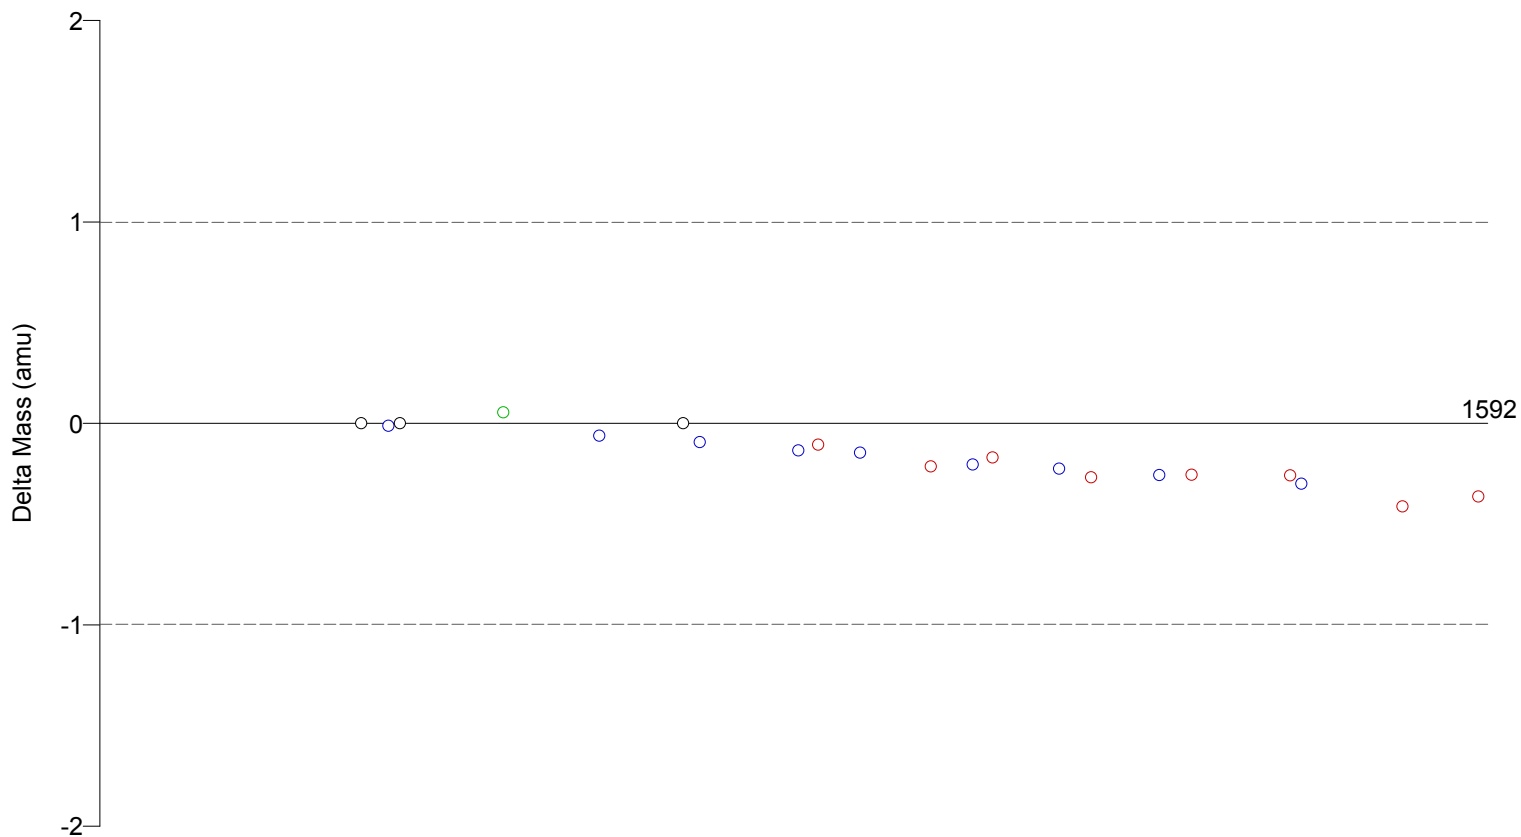

#19287468-1 NL: 3.64E4

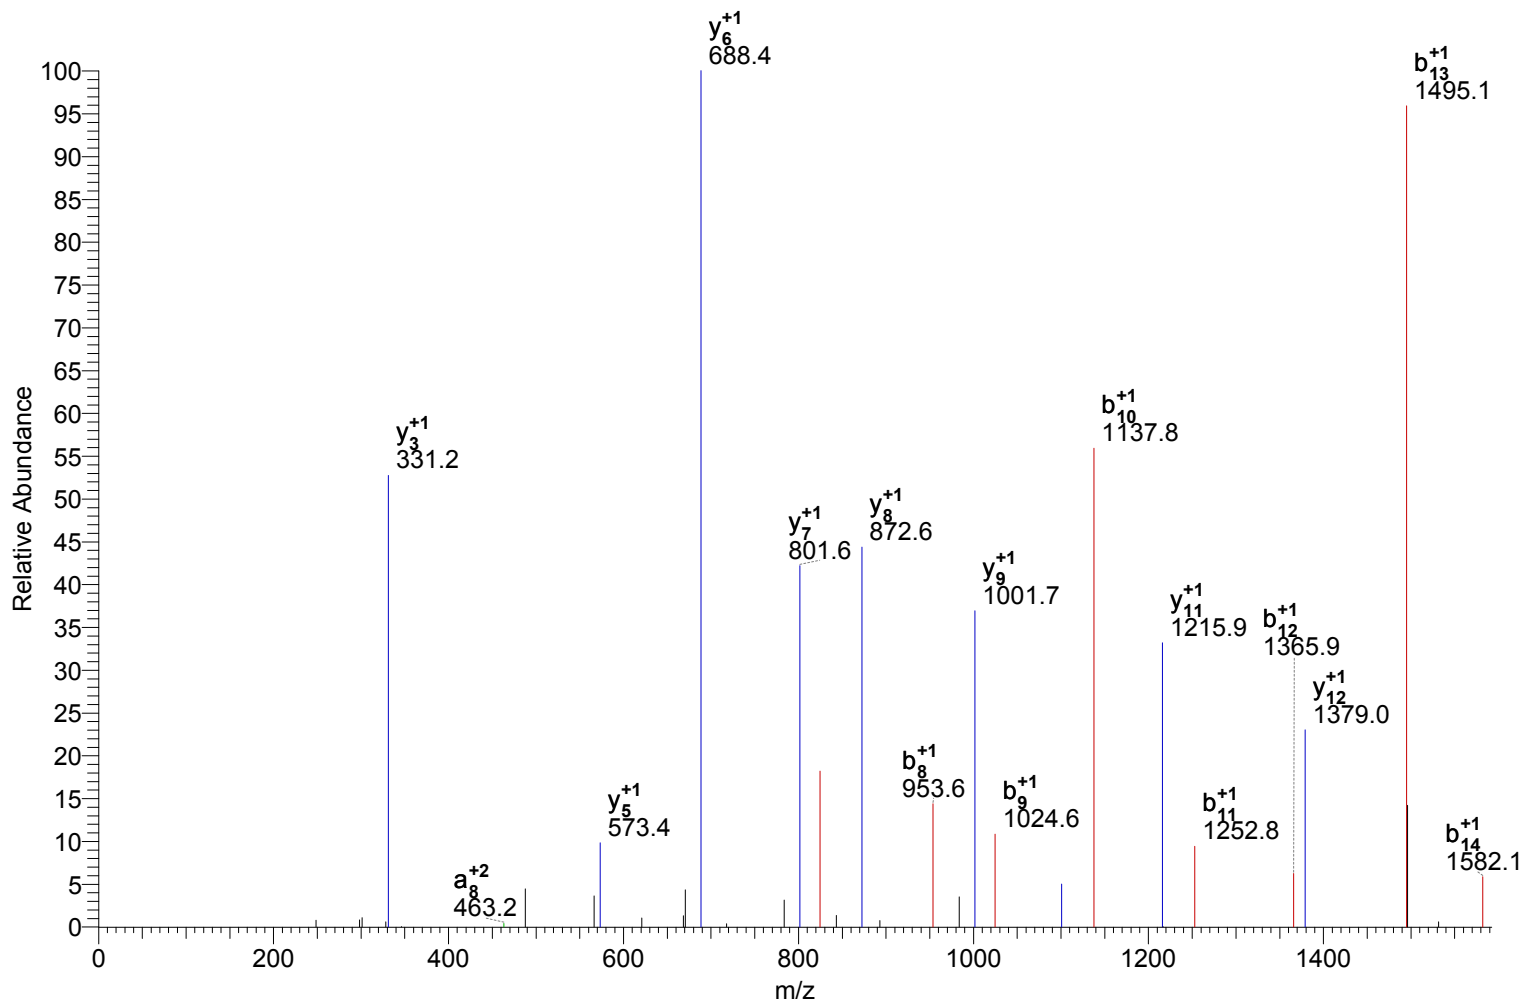

---

| Reference                          |                 |         |   | P      | Score | Coverage | Accession |     |       |       |
|------------------------------------|-----------------|---------|---|--------|-------|----------|-----------|-----|-------|-------|
| Scan(s)                            | Sequence        | MH+     | z | P      | XC    | DeltaCn  | Sp        | RSp | Ions  | Count |
| IPI:IPI00828156.1 TREMBL:A2NKM6 Ta |                 |         |   | 3e-006 | 20.2  | 0.0      |           | 0   |       |       |
| 19287468 - 1                       | K.NTLYLQMNSLR.A | 1352.70 | 2 | 3e-006 | 4.027 | 0.643    | 1526.5    | 1   | 20/30 | 39    |
| 2118291816 -                       | R.LSCAASGFTFR.S | 1217.56 | 2 | 6e-006 | 3.492 | 0.654    | 1231.4    | 1   | 20/30 | 3     |

2 of 2 peptide matches reported, 0 removed due to filtering

DTA for scans: 19287468-1  
Precursor ion: 676.85  
Mass type: mono  
Mod's: (M\* +15.99492) C=161.01468

Ion series for charge: +1

| AA | A ions        | B ions         | B* ions | Bo ions | C ions | Y ions         | Y* ions | Yo ions | Z ions |
|----|---------------|----------------|---------|---------|--------|----------------|---------|---------|--------|
| N  | 87.06         | 115.05         |         |         |        |                |         |         |        |
| T  | 188.10        | <b>216.10</b>  |         |         |        | 1238.66        |         |         |        |
| L  | <b>301.19</b> | <b>329.18</b>  |         |         |        | <b>1137.61</b> |         |         |        |
| Y  | <b>464.25</b> | <b>492.25</b>  |         |         |        | <b>1024.52</b> |         |         |        |
| L  | <b>577.33</b> | <b>605.33</b>  |         |         |        | <b>861.46</b>  |         |         |        |
| Q  | 705.39        | <b>733.39</b>  |         |         |        | <b>748.38</b>  |         |         |        |
| M  | 836.43        | <b>864.43</b>  |         |         |        | <b>620.32</b>  |         |         |        |
| N  | 950.48        | <b>978.47</b>  |         |         |        | <b>489.28</b>  |         |         |        |
| S  | 1037.51       | <b>1065.50</b> |         |         |        | <b>375.24</b>  |         |         |        |
| L  | 1150.59       | <b>1178.59</b> |         |         |        | <b>288.20</b>  |         |         |        |
| R  |               |                |         |         |        | 175.12         |         |         |        |



#19287468-1 NL: 1.01E5



DTA for scans: 2118291816-26226248  
Precursor ion: 609.29  
Mass type: mono  
Mod's: (M\* +15.99492) C=161.01468

Ion series for charge: +1

| AA | A ions         | B ions        | B* ions | Bo ions | C ions | Y ions         | Y* ions | Yo ions | Z ions |
|----|----------------|---------------|---------|---------|--------|----------------|---------|---------|--------|
| L  | 86.10          | 114.09        |         |         |        |                |         |         |        |
| S  | 173.13         | <b>201.12</b> |         |         |        | <b>1104.48</b> |         |         |        |
| C  | 334.14         | <b>362.14</b> |         |         |        | <b>1017.45</b> |         |         |        |
| A  | 405.18         | <b>433.18</b> |         |         |        | <b>856.43</b>  |         |         |        |
| A  | <b>476.22</b>  | <b>504.21</b> |         |         |        | <b>785.39</b>  |         |         |        |
| S  | 563.25         | <b>591.24</b> |         |         |        | <b>714.36</b>  |         |         |        |
| G  | 620.27         | <b>648.27</b> |         |         |        | <b>627.32</b>  |         |         |        |
| F  | <b>767.34</b>  | <b>795.33</b> |         |         |        | <b>570.30</b>  |         |         |        |
| T  | 868.39         | <b>896.38</b> |         |         |        | <b>423.24</b>  |         |         |        |
| F  | <b>1015.46</b> | 1043.45       |         |         |        | <b>322.19</b>  |         |         |        |
| R  |                |               |         |         |        | 175.12         |         |         |        |

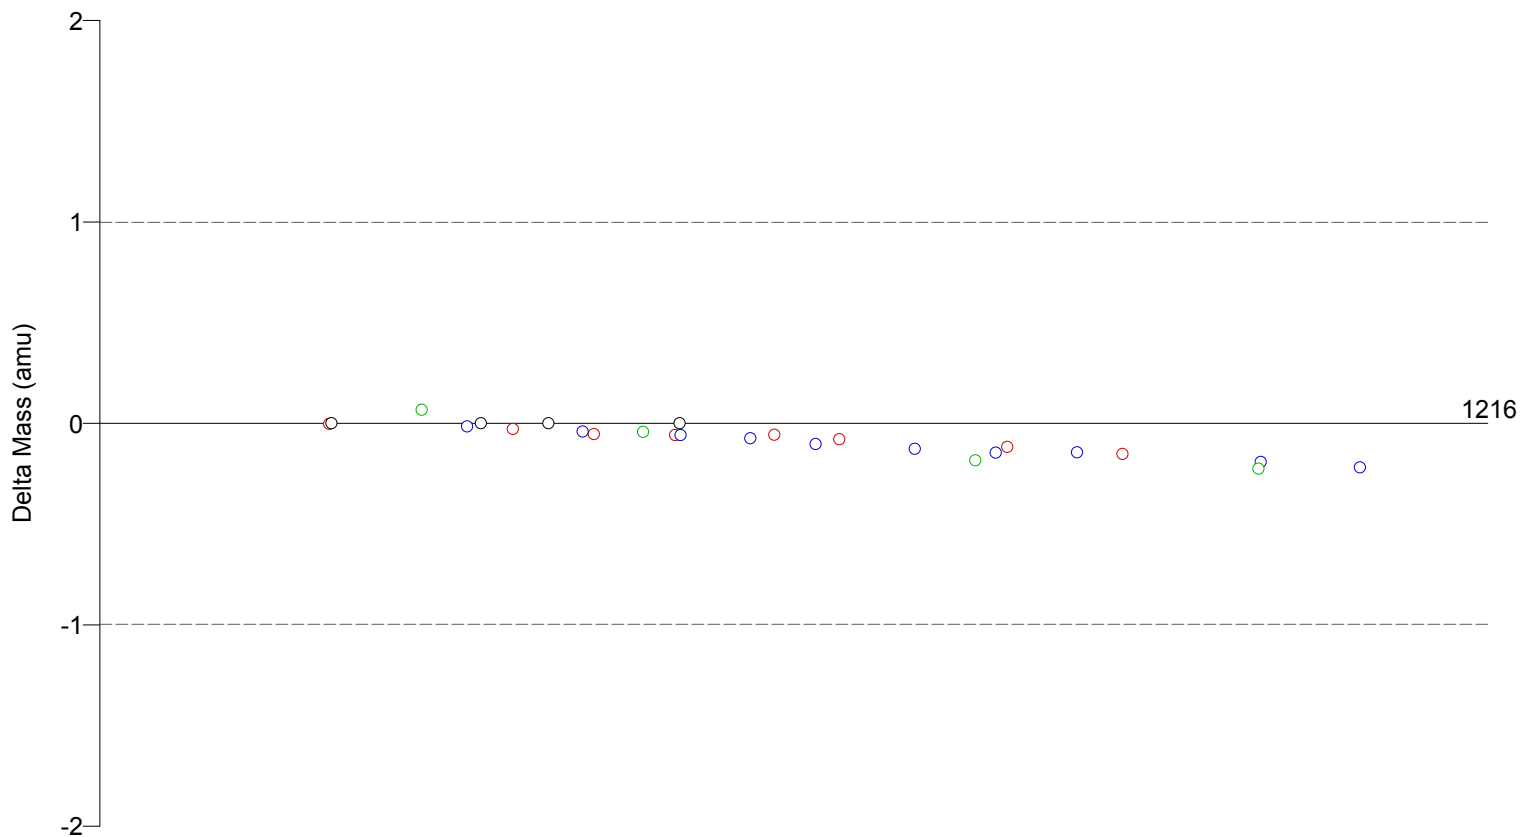

#2118291816-26226248 NL: 9.29E4

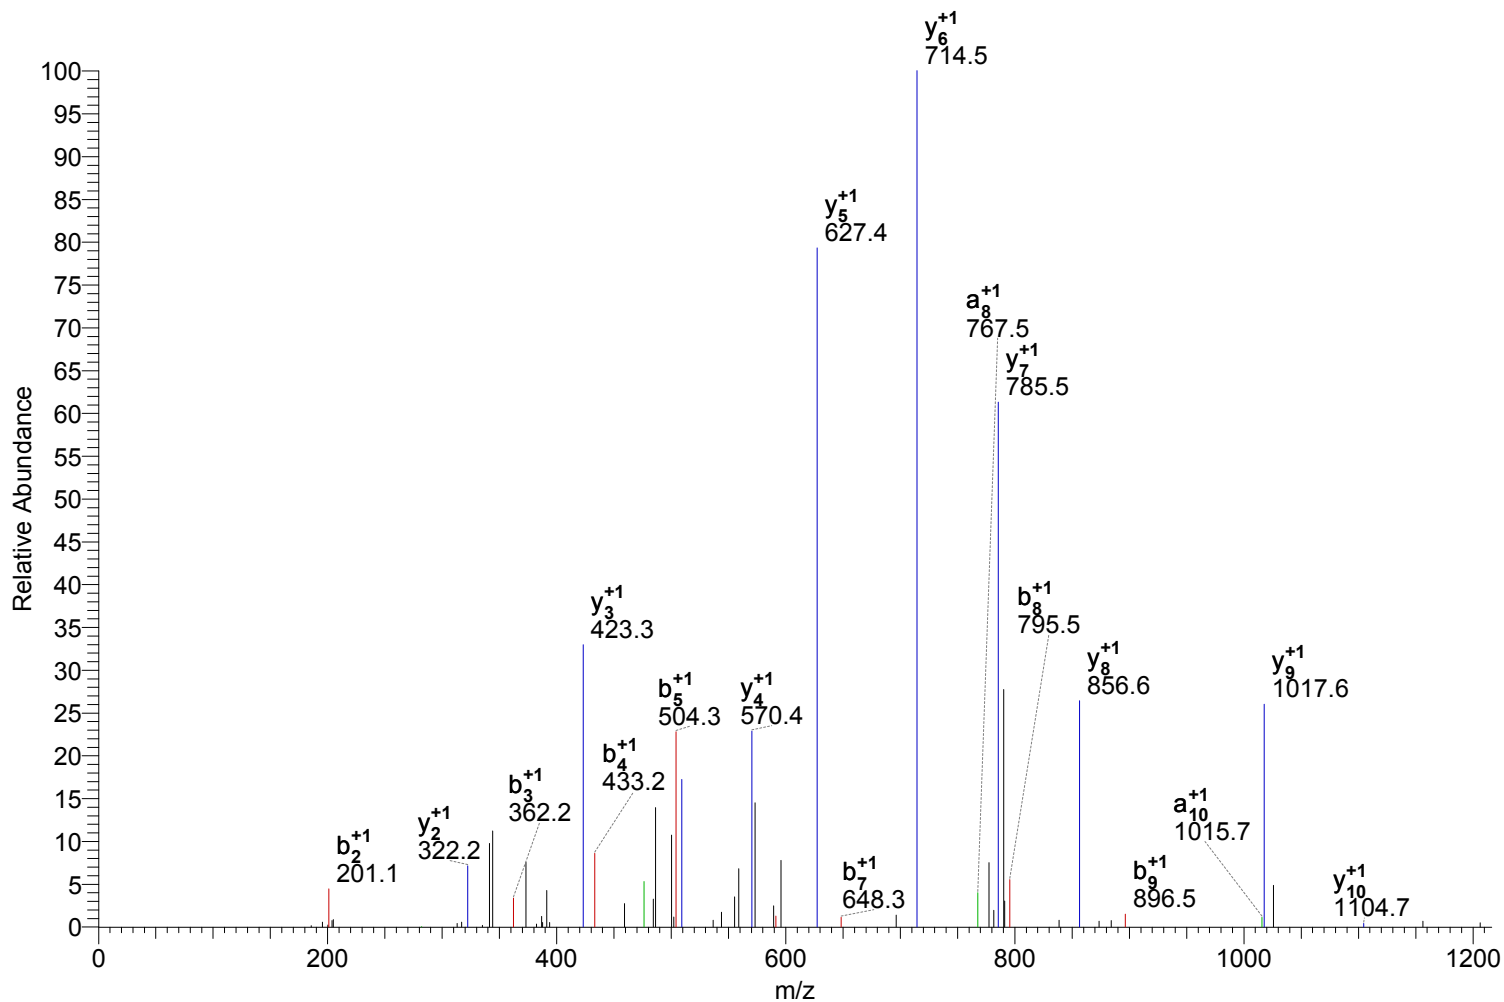

---

| Reference                       |                           |         |   | P      | Score | Coverage | Accession |     |       |       |
|---------------------------------|---------------------------|---------|---|--------|-------|----------|-----------|-----|-------|-------|
| Scan(s)                         | Sequence                  | MH+     | z | P      | XC    | DeltaCn  | Sp        | RSp | Ions  | Count |
| IPI:IPI00383887.1 TREMBL:Q9UGP3 | Tax_Id=9606 Gene_Symbol=- | Immu    |   | 3e-006 | 10.2  | 0.0      | 0         |     |       |       |
| 19287468 - 1                    | K.NTLYLQMNSLR.A           | 1352.70 | 2 | 3e-006 | 4.027 | 0.643    | 1526.5    | 1   | 20/30 | 39    |

1 of 1 peptide matches reported, 0 removed due to filtering

DTA for scans: 19287468-1  
Precursor ion: 676.85  
Mass type: mono  
Mod's: (M\* +15.99492) C=161.01468

Ion series for charge: +1

| AA | A ions        | B ions         | B* ions | Bo ions | C ions | Y ions         | Y* ions | Yo ions | Z ions |
|----|---------------|----------------|---------|---------|--------|----------------|---------|---------|--------|
| N  | 87.06         | 115.05         |         |         |        |                |         |         |        |
| T  | 188.10        | <b>216.10</b>  |         |         |        | 1238.66        |         |         |        |
| L  | <b>301.19</b> | <b>329.18</b>  |         |         |        | <b>1137.61</b> |         |         |        |
| Y  | <b>464.25</b> | <b>492.25</b>  |         |         |        | <b>1024.52</b> |         |         |        |
| L  | <b>577.33</b> | <b>605.33</b>  |         |         |        | <b>861.46</b>  |         |         |        |
| Q  | 705.39        | <b>733.39</b>  |         |         |        | <b>748.38</b>  |         |         |        |
| M  | 836.43        | <b>864.43</b>  |         |         |        | <b>620.32</b>  |         |         |        |
| N  | 950.48        | <b>978.47</b>  |         |         |        | <b>489.28</b>  |         |         |        |
| S  | 1037.51       | <b>1065.50</b> |         |         |        | <b>375.24</b>  |         |         |        |
| L  | 1150.59       | <b>1178.59</b> |         |         |        | <b>288.20</b>  |         |         |        |
| R  |               |                |         |         |        | 175.12         |         |         |        |





#19287468-1 NL: 1.01E5



---

| Reference                          |                 |         |   | P      | Score | Coverage | Accession |     |       |       |
|------------------------------------|-----------------|---------|---|--------|-------|----------|-----------|-----|-------|-------|
| Scan(s)                            | Sequence        | MH+     | z | P      | XC    | DeltaCn  | Sp        | RSp | Ions  | Count |
| IPI:IPI00384392.1 TREMBL:Q9UL72 Ta |                 |         |   | 3e-006 | 10.2  | 0.0      | 0         |     |       |       |
| 19287468 - 1                       | K.NTLYLQMNSLR.A | 1352.70 | 2 | 3e-006 | 4.027 | 0.643    | 1526.5    | 1   | 20/30 | 39    |

1 of 1 peptide matches reported, 0 removed due to filtering

DTA for scans: 19287468-1  
Precursor ion: 676.85  
Mass type: mono  
Mod's: (M\* +15.99492) C=161.01468

Ion series for charge: +1

| AA | A ions        | B ions         | B* ions | Bo ions | C ions | Y ions         | Y* ions | Yo ions | Z ions |
|----|---------------|----------------|---------|---------|--------|----------------|---------|---------|--------|
| N  | 87.06         | 115.05         |         |         |        |                |         |         |        |
| T  | 188.10        | <b>216.10</b>  |         |         |        | 1238.66        |         |         |        |
| L  | <b>301.19</b> | <b>329.18</b>  |         |         |        | <b>1137.61</b> |         |         |        |
| Y  | <b>464.25</b> | <b>492.25</b>  |         |         |        | <b>1024.52</b> |         |         |        |
| L  | <b>577.33</b> | <b>605.33</b>  |         |         |        | <b>861.46</b>  |         |         |        |
| Q  | 705.39        | <b>733.39</b>  |         |         |        | <b>748.38</b>  |         |         |        |
| M  | 836.43        | <b>864.43</b>  |         |         |        | <b>620.32</b>  |         |         |        |
| N  | 950.48        | <b>978.47</b>  |         |         |        | <b>489.28</b>  |         |         |        |
| S  | 1037.51       | <b>1065.50</b> |         |         |        | <b>375.24</b>  |         |         |        |
| L  | 1150.59       | <b>1178.59</b> |         |         |        | <b>288.20</b>  |         |         |        |
| R  |               |                |         |         |        | 175.12         |         |         |        |



#19287468-1 NL: 1.01E5



---

| Reference                          |                 |         |   | P      | Score | Coverage | Accession |     |       |       |
|------------------------------------|-----------------|---------|---|--------|-------|----------|-----------|-----|-------|-------|
| Scan(s)                            | Sequence        | MH+     | z | P      | XC    | DeltaCn  | Sp        | RSp | Ions  | Count |
| IPI:IPI00413194.1 TREMBL:Q9UL93 Ta |                 |         |   | 3e-006 | 10.2  | 0.0      | 0         |     |       |       |
| 19287468 - 1                       | K.NTLYLQMNSLR.A | 1352.70 | 2 | 3e-006 | 4.027 | 0.643    | 1526.5    | 1   | 20/30 | 39    |

1 of 1 peptide matches reported, 0 removed due to filtering

DTA for scans: 19287468-1  
Precursor ion: 676.85  
Mass type: mono  
Mod's: (M\* +15.99492) C=161.01468

Ion series for charge: +1

| AA | A ions        | B ions         | B* ions | Bo ions | C ions | Y ions         | Y* ions | Yo ions | Z ions |
|----|---------------|----------------|---------|---------|--------|----------------|---------|---------|--------|
| N  | 87.06         | 115.05         |         |         |        |                |         |         |        |
| T  | 188.10        | <b>216.10</b>  |         |         |        | 1238.66        |         |         |        |
| L  | <b>301.19</b> | <b>329.18</b>  |         |         |        | <b>1137.61</b> |         |         |        |
| Y  | <b>464.25</b> | <b>492.25</b>  |         |         |        | <b>1024.52</b> |         |         |        |
| L  | <b>577.33</b> | <b>605.33</b>  |         |         |        | <b>861.46</b>  |         |         |        |
| Q  | 705.39        | <b>733.39</b>  |         |         |        | <b>748.38</b>  |         |         |        |
| M  | 836.43        | <b>864.43</b>  |         |         |        | <b>620.32</b>  |         |         |        |
| N  | 950.48        | <b>978.47</b>  |         |         |        | <b>489.28</b>  |         |         |        |
| S  | 1037.51       | <b>1065.50</b> |         |         |        | <b>375.24</b>  |         |         |        |
| L  | 1150.59       | <b>1178.59</b> |         |         |        | <b>288.20</b>  |         |         |        |
| R  |               |                |         |         |        | 175.12         |         |         |        |



#19287468-1 NL: 1.01E5



---

| Reference                          |                 |         |   | P      | Score | Coverage | Accession |     |       |       |
|------------------------------------|-----------------|---------|---|--------|-------|----------|-----------|-----|-------|-------|
| Scan(s)                            | Sequence        | MH+     | z | P      | XC    | DeltaCn  | Sp        | RSp | Ions  | Count |
| IPI:IPI00736507.2 TREMBL:Q0ZCG7;Q0 |                 |         |   | 3e-006 | 10.2  | 0.0      |           | 0   |       |       |
| 19287468 - 1                       | K.NTLYLQMNSLR.A | 1352.70 | 2 | 3e-006 | 4.027 | 0.643    | 1526.5    | 1   | 20/30 | 39    |

1 of 1 peptide matches reported, 0 removed due to filtering



DTA for scans: 19287468-1  
Precursor ion: 676.85  
Mass type: mono  
Mod's: (M\* +15.99492) C=161.01468

Ion series for charge: +1

| AA | A ions        | B ions         | B* ions | Bo ions | C ions | Y ions         | Y* ions | Yo ions | Z ions |
|----|---------------|----------------|---------|---------|--------|----------------|---------|---------|--------|
| N  | 87.06         | 115.05         |         |         |        |                |         |         |        |
| T  | 188.10        | <b>216.10</b>  |         |         |        | 1238.66        |         |         |        |
| L  | <b>301.19</b> | <b>329.18</b>  |         |         |        | <b>1137.61</b> |         |         |        |
| Y  | <b>464.25</b> | <b>492.25</b>  |         |         |        | <b>1024.52</b> |         |         |        |
| L  | <b>577.33</b> | <b>605.33</b>  |         |         |        | <b>861.46</b>  |         |         |        |
| Q  | 705.39        | <b>733.39</b>  |         |         |        | <b>748.38</b>  |         |         |        |
| M  | 836.43        | <b>864.43</b>  |         |         |        | <b>620.32</b>  |         |         |        |
| N  | 950.48        | <b>978.47</b>  |         |         |        | <b>489.28</b>  |         |         |        |
| S  | 1037.51       | <b>1065.50</b> |         |         |        | <b>375.24</b>  |         |         |        |
| L  | 1150.59       | <b>1178.59</b> |         |         |        | <b>288.20</b>  |         |         |        |
| R  |               |                |         |         |        | 175.12         |         |         |        |



#19287468-1 NL: 1.01E5



---

| Reference                          |                 |         |   | P      | Score | Coverage | Accession |     |       |       |
|------------------------------------|-----------------|---------|---|--------|-------|----------|-----------|-----|-------|-------|
| Scan(s)                            | Sequence        | MH+     | z | P      | XC    | DeltaCn  | Sp        | RSp | Ions  | Count |
| IPI:IPI00748665.3 TREMBL:A2J1N3;Q0 |                 |         |   | 3e-006 | 10.2  | 0.0      |           | 0   |       |       |
| 19287468 - 1                       | K.NTLYLQMNSLR.A | 1352.70 | 2 | 3e-006 | 4.027 | 0.643    | 1526.5    | 1   | 20/30 | 39    |

1 of 1 peptide matches reported, 0 removed due to filtering

DTA for scans: 19287468-1  
Precursor ion: 676.85  
Mass type: mono  
Mod's: (M\* +15.99492) C=161.01468

Ion series for charge: +1

| AA | A ions        | B ions         | B* ions | Bo ions | C ions | Y ions         | Y* ions | Yo ions | Z ions |
|----|---------------|----------------|---------|---------|--------|----------------|---------|---------|--------|
| N  | 87.06         | 115.05         |         |         |        |                |         |         |        |
| T  | 188.10        | <b>216.10</b>  |         |         |        | 1238.66        |         |         |        |
| L  | <b>301.19</b> | <b>329.18</b>  |         |         |        | <b>1137.61</b> |         |         |        |
| Y  | <b>464.25</b> | <b>492.25</b>  |         |         |        | <b>1024.52</b> |         |         |        |
| L  | <b>577.33</b> | <b>605.33</b>  |         |         |        | <b>861.46</b>  |         |         |        |
| Q  | 705.39        | <b>733.39</b>  |         |         |        | <b>748.38</b>  |         |         |        |
| M  | 836.43        | <b>864.43</b>  |         |         |        | <b>620.32</b>  |         |         |        |
| N  | 950.48        | <b>978.47</b>  |         |         |        | <b>489.28</b>  |         |         |        |
| S  | 1037.51       | <b>1065.50</b> |         |         |        | <b>375.24</b>  |         |         |        |
| L  | 1150.59       | <b>1178.59</b> |         |         |        | <b>288.20</b>  |         |         |        |
| R  |               |                |         |         |        | 175.12         |         |         |        |



#19287468-1 NL: 1.01E5



---

| Reference                          |                 |         |   | P      | Score | Coverage | Accession |     |       |       |
|------------------------------------|-----------------|---------|---|--------|-------|----------|-----------|-----|-------|-------|
| Scan(s)                            | Sequence        | MH+     | z | P      | XC    | DeltaCn  | Sp        | RSp | Ions  | Count |
| IPI:IPI00748998.1 TREMBL:Q65ZC9 Ta |                 |         |   | 3e-006 | 10.2  | 0.0      | 0         |     |       |       |
| 19287468 - 1                       | K.NTLYLQMNSLR.A | 1352.70 | 2 | 3e-006 | 4.027 | 0.643    | 1526.5    | 1   | 20/30 | 39    |

1 of 1 peptide matches reported, 0 removed due to filtering

DTA for scans: 19287468-1  
Precursor ion: 676.85  
Mass type: mono  
Mod's: (M\* +15.99492) C=161.01468

Ion series for charge: +1

| AA | A ions        | B ions         | B* ions | Bo ions | C ions | Y ions         | Y* ions | Yo ions | Z ions |
|----|---------------|----------------|---------|---------|--------|----------------|---------|---------|--------|
| N  | 87.06         | 115.05         |         |         |        |                |         |         |        |
| T  | 188.10        | <b>216.10</b>  |         |         |        | 1238.66        |         |         |        |
| L  | <b>301.19</b> | <b>329.18</b>  |         |         |        | <b>1137.61</b> |         |         |        |
| Y  | <b>464.25</b> | <b>492.25</b>  |         |         |        | <b>1024.52</b> |         |         |        |
| L  | <b>577.33</b> | <b>605.33</b>  |         |         |        | <b>861.46</b>  |         |         |        |
| Q  | 705.39        | <b>733.39</b>  |         |         |        | <b>748.38</b>  |         |         |        |
| M  | 836.43        | <b>864.43</b>  |         |         |        | <b>620.32</b>  |         |         |        |
| N  | 950.48        | <b>978.47</b>  |         |         |        | <b>489.28</b>  |         |         |        |
| S  | 1037.51       | <b>1065.50</b> |         |         |        | <b>375.24</b>  |         |         |        |
| L  | 1150.59       | <b>1178.59</b> |         |         |        | <b>288.20</b>  |         |         |        |
| R  |               |                |         |         |        | 175.12         |         |         |        |



#19287468-1 NL: 1.01E5





---

| Reference                          |                 |         |   | P      | Score | Coverage | Accession |     |       |       |
|------------------------------------|-----------------|---------|---|--------|-------|----------|-----------|-----|-------|-------|
| Scan(s)                            | Sequence        | MH+     | z | P      | XC    | DeltaCn  | Sp        | RSp | Ions  | Count |
| IPI:IPI00760721.3 ENSEMBL:ENSP0000 |                 |         |   | 3e-006 | 10.2  | 0.0      | 0         |     |       |       |
| 19287468 - 1                       | K.NTLYLQMNSLR.A | 1352.70 | 2 | 3e-006 | 4.027 | 0.643    | 1526.5    | 1   | 20/30 | 39    |

1 of 1 peptide matches reported, 0 removed due to filtering

DTA for scans: 19287468-1  
Precursor ion: 676.85  
Mass type: mono  
Mod's: (M\* +15.99492) C=161.01468

Ion series for charge: +1

| AA | A ions        | B ions         | B* ions | Bo ions | C ions | Y ions         | Y* ions | Yo ions | Z ions |
|----|---------------|----------------|---------|---------|--------|----------------|---------|---------|--------|
| N  | 87.06         | 115.05         |         |         |        |                |         |         |        |
| T  | 188.10        | <b>216.10</b>  |         |         |        | 1238.66        |         |         |        |
| L  | <b>301.19</b> | <b>329.18</b>  |         |         |        | <b>1137.61</b> |         |         |        |
| Y  | <b>464.25</b> | <b>492.25</b>  |         |         |        | <b>1024.52</b> |         |         |        |
| L  | <b>577.33</b> | <b>605.33</b>  |         |         |        | <b>861.46</b>  |         |         |        |
| Q  | 705.39        | <b>733.39</b>  |         |         |        | <b>748.38</b>  |         |         |        |
| M  | 836.43        | <b>864.43</b>  |         |         |        | <b>620.32</b>  |         |         |        |
| N  | 950.48        | <b>978.47</b>  |         |         |        | <b>489.28</b>  |         |         |        |
| S  | 1037.51       | <b>1065.50</b> |         |         |        | <b>375.24</b>  |         |         |        |
| L  | 1150.59       | <b>1178.59</b> |         |         |        | <b>288.20</b>  |         |         |        |
| R  |               |                |         |         |        | 175.12         |         |         |        |



#19287468-1 NL: 1.01E5



---

| Reference                          |                 |         |   | P      | Score | Coverage | Accession |     |       |       |
|------------------------------------|-----------------|---------|---|--------|-------|----------|-----------|-----|-------|-------|
| Scan(s)                            | Sequence        | MH+     | z | P      | XC    | DeltaCn  | Sp        | RSp | Ions  | Count |
| IPI:IPI00783094.1 TREMBL:Q0ZCG4;Q0 |                 |         |   | 3e-006 | 10.2  | 0.0      |           | 0   |       |       |
| 19287468 - 1                       | K.NTLYLQMNSLR.A | 1352.70 | 2 | 3e-006 | 4.027 | 0.643    | 1526.5    | 1   | 20/30 | 39    |

1 of 1 peptide matches reported, 0 removed due to filtering

DTA for scans: 19287468-1  
Precursor ion: 676.85  
Mass type: mono  
Mod's: (M\* +15.99492) C=161.01468

Ion series for charge: +1

| AA | A ions        | B ions         | B* ions | Bo ions | C ions | Y ions         | Y* ions | Yo ions | Z ions |
|----|---------------|----------------|---------|---------|--------|----------------|---------|---------|--------|
| N  | 87.06         | 115.05         |         |         |        |                |         |         |        |
| T  | 188.10        | <b>216.10</b>  |         |         |        | 1238.66        |         |         |        |
| L  | <b>301.19</b> | <b>329.18</b>  |         |         |        | <b>1137.61</b> |         |         |        |
| Y  | <b>464.25</b> | <b>492.25</b>  |         |         |        | <b>1024.52</b> |         |         |        |
| L  | <b>577.33</b> | <b>605.33</b>  |         |         |        | <b>861.46</b>  |         |         |        |
| Q  | 705.39        | <b>733.39</b>  |         |         |        | <b>748.38</b>  |         |         |        |
| M  | 836.43        | <b>864.43</b>  |         |         |        | <b>620.32</b>  |         |         |        |
| N  | 950.48        | <b>978.47</b>  |         |         |        | <b>489.28</b>  |         |         |        |
| S  | 1037.51       | <b>1065.50</b> |         |         |        | <b>375.24</b>  |         |         |        |
| L  | 1150.59       | <b>1178.59</b> |         |         |        | <b>288.20</b>  |         |         |        |
| R  |               |                |         |         |        | 175.12         |         |         |        |



#19287468-1 NL: 1.01E5



---

| Reference                          |                 |         |   | P      | Score | Coverage | Accession |     |       |       |
|------------------------------------|-----------------|---------|---|--------|-------|----------|-----------|-----|-------|-------|
| Scan(s)                            | Sequence        | MH+     | z | P      | XC    | DeltaCn  | Sp        | RSp | Ions  | Count |
| IPI:IPI00783116.1 TREMBL:Q0ZCI5 Ta |                 |         |   | 3e-006 | 10.2  | 0.0      |           | 0   |       |       |
| 19287468 - 1                       | K.NTLYLQMNSLR.A | 1352.70 | 2 | 3e-006 | 4.027 | 0.643    | 1526.5    | 1   | 20/30 | 39    |

1 of 1 peptide matches reported, 0 removed due to filtering

DTA for scans: 19287468-1  
Precursor ion: 676.85  
Mass type: mono  
Mod's: (M\* +15.99492) C=161.01468

Ion series for charge: +1

| AA | A ions        | B ions         | B* ions | Bo ions | C ions | Y ions         | Y* ions | Yo ions | Z ions |
|----|---------------|----------------|---------|---------|--------|----------------|---------|---------|--------|
| N  | 87.06         | 115.05         |         |         |        |                |         |         |        |
| T  | 188.10        | <b>216.10</b>  |         |         |        | 1238.66        |         |         |        |
| L  | <b>301.19</b> | <b>329.18</b>  |         |         |        | <b>1137.61</b> |         |         |        |
| Y  | <b>464.25</b> | <b>492.25</b>  |         |         |        | <b>1024.52</b> |         |         |        |
| L  | <b>577.33</b> | <b>605.33</b>  |         |         |        | <b>861.46</b>  |         |         |        |
| Q  | 705.39        | <b>733.39</b>  |         |         |        | <b>748.38</b>  |         |         |        |
| M  | 836.43        | <b>864.43</b>  |         |         |        | <b>620.32</b>  |         |         |        |
| N  | 950.48        | <b>978.47</b>  |         |         |        | <b>489.28</b>  |         |         |        |
| S  | 1037.51       | <b>1065.50</b> |         |         |        | <b>375.24</b>  |         |         |        |
| L  | 1150.59       | <b>1178.59</b> |         |         |        | <b>288.20</b>  |         |         |        |
| R  |               |                |         |         |        | 175.12         |         |         |        |





#19287468-1 NL: 1.01E5



---

| Reference                          |                 |         |   | P      | Score | Coverage | Accession |     |       |       |
|------------------------------------|-----------------|---------|---|--------|-------|----------|-----------|-----|-------|-------|
| Scan(s)                            | Sequence        | MH+     | z | P      | XC    | DeltaCn  | Sp        | RSp | Ions  | Count |
| IPI:IPI00783244.1 TREMBL:Q0ZCH1;Q0 |                 |         |   | 3e-006 | 10.2  | 0.0      |           | 0   |       |       |
| 19287468 - 1                       | K.NTLYLQMNSLR.A | 1352.70 | 2 | 3e-006 | 4.027 | 0.643    | 1526.5    | 1   | 20/30 | 39    |

1 of 1 peptide matches reported, 0 removed due to filtering

DTA for scans: 19287468-1  
Precursor ion: 676.85  
Mass type: mono  
Mod's: (M\* +15.99492) C=161.01468

Ion series for charge: +1

| AA | A ions        | B ions         | B* ions | Bo ions | C ions | Y ions         | Y* ions | Yo ions | Z ions |
|----|---------------|----------------|---------|---------|--------|----------------|---------|---------|--------|
| N  | 87.06         | 115.05         |         |         |        |                |         |         |        |
| T  | 188.10        | <b>216.10</b>  |         |         |        | 1238.66        |         |         |        |
| L  | <b>301.19</b> | <b>329.18</b>  |         |         |        | <b>1137.61</b> |         |         |        |
| Y  | <b>464.25</b> | <b>492.25</b>  |         |         |        | <b>1024.52</b> |         |         |        |
| L  | <b>577.33</b> | <b>605.33</b>  |         |         |        | <b>861.46</b>  |         |         |        |
| Q  | 705.39        | <b>733.39</b>  |         |         |        | <b>748.38</b>  |         |         |        |
| M  | 836.43        | <b>864.43</b>  |         |         |        | <b>620.32</b>  |         |         |        |
| N  | 950.48        | <b>978.47</b>  |         |         |        | <b>489.28</b>  |         |         |        |
| S  | 1037.51       | <b>1065.50</b> |         |         |        | <b>375.24</b>  |         |         |        |
| L  | 1150.59       | <b>1178.59</b> |         |         |        | <b>288.20</b>  |         |         |        |
| R  |               |                |         |         |        | 175.12         |         |         |        |



#19287468-1 NL: 1.01E5



---

| Reference                          |                 |         |   | P      | Score | Coverage | Accession |     |       |       |
|------------------------------------|-----------------|---------|---|--------|-------|----------|-----------|-----|-------|-------|
| Scan(s)                            | Sequence        | MH+     | z | P      | XC    | DeltaCn  | Sp        | RSp | Ions  | Count |
| IPI:IPI00783393.1 TREMBL:Q0ZCI2 Ta |                 |         |   | 3e-006 | 10.2  | 0.0      | 0         |     |       |       |
| 19287468 - 1                       | K.NTLYLQMNSLR.A | 1352.70 | 2 | 3e-006 | 4.027 | 0.643    | 1526.5    | 1   | 20/30 | 39    |

1 of 1 peptide matches reported, 0 removed due to filtering

DTA for scans: 19287468-1  
Precursor ion: 676.85  
Mass type: mono  
Mod's: (M\* +15.99492) C=161.01468

Ion series for charge: +1

| AA | A ions        | B ions         | B* ions | Bo ions | C ions | Y ions         | Y* ions | Yo ions | Z ions |
|----|---------------|----------------|---------|---------|--------|----------------|---------|---------|--------|
| N  | 87.06         | 115.05         |         |         |        |                |         |         |        |
| T  | 188.10        | <b>216.10</b>  |         |         |        | 1238.66        |         |         |        |
| L  | <b>301.19</b> | <b>329.18</b>  |         |         |        | <b>1137.61</b> |         |         |        |
| Y  | <b>464.25</b> | <b>492.25</b>  |         |         |        | <b>1024.52</b> |         |         |        |
| L  | <b>577.33</b> | <b>605.33</b>  |         |         |        | <b>861.46</b>  |         |         |        |
| Q  | 705.39        | <b>733.39</b>  |         |         |        | <b>748.38</b>  |         |         |        |
| M  | 836.43        | <b>864.43</b>  |         |         |        | <b>620.32</b>  |         |         |        |
| N  | 950.48        | <b>978.47</b>  |         |         |        | <b>489.28</b>  |         |         |        |
| S  | 1037.51       | <b>1065.50</b> |         |         |        | <b>375.24</b>  |         |         |        |
| L  | 1150.59       | <b>1178.59</b> |         |         |        | <b>288.20</b>  |         |         |        |
| R  |               |                |         |         |        | 175.12         |         |         |        |



#19287468-1 NL: 1.01E5



---

| Reference                          |                 |         |   | P      | Score | Coverage | Accession |     |       |       |
|------------------------------------|-----------------|---------|---|--------|-------|----------|-----------|-----|-------|-------|
| Scan(s)                            | Sequence        | MH+     | z | P      | XC    | DeltaCn  | Sp        | RSp | Ions  | Count |
| IPI:IPI00783818.1 TREMBL:Q0ZCJ1 Ta |                 |         |   | 3e-006 | 10.2  | 0.0      | 0         |     |       |       |
| 19287468 - 1                       | K.NTLYLQMNSLR.A | 1352.70 | 2 | 3e-006 | 4.027 | 0.643    | 1526.5    | 1   | 20/30 | 39    |

1 of 1 peptide matches reported, 0 removed due to filtering



DTA for scans: 19287468-1  
Precursor ion: 676.85  
Mass type: mono  
Mod's: (M\* +15.99492) C=161.01468

Ion series for charge: +1

| AA | A ions        | B ions         | B* ions | Bo ions | C ions | Y ions         | Y* ions | Yo ions | Z ions |
|----|---------------|----------------|---------|---------|--------|----------------|---------|---------|--------|
| N  | 87.06         | 115.05         |         |         |        |                |         |         |        |
| T  | 188.10        | <b>216.10</b>  |         |         |        | 1238.66        |         |         |        |
| L  | <b>301.19</b> | <b>329.18</b>  |         |         |        | <b>1137.61</b> |         |         |        |
| Y  | <b>464.25</b> | <b>492.25</b>  |         |         |        | <b>1024.52</b> |         |         |        |
| L  | <b>577.33</b> | <b>605.33</b>  |         |         |        | <b>861.46</b>  |         |         |        |
| Q  | 705.39        | <b>733.39</b>  |         |         |        | <b>748.38</b>  |         |         |        |
| M  | 836.43        | <b>864.43</b>  |         |         |        | <b>620.32</b>  |         |         |        |
| N  | 950.48        | <b>978.47</b>  |         |         |        | <b>489.28</b>  |         |         |        |
| S  | 1037.51       | <b>1065.50</b> |         |         |        | <b>375.24</b>  |         |         |        |
| L  | 1150.59       | <b>1178.59</b> |         |         |        | <b>288.20</b>  |         |         |        |
| R  |               |                |         |         |        | 175.12         |         |         |        |



#19287468-1 NL: 1.01E5



---

| Reference                          |                 |         |   | P      | Score | Coverage | Accession |     |       |       |
|------------------------------------|-----------------|---------|---|--------|-------|----------|-----------|-----|-------|-------|
| Scan(s)                            | Sequence        | MH+     | z | P      | XC    | DeltaCn  | Sp        | RSp | Ions  | Count |
| IPI:IPI00783909.1 TREMBL:Q0ZCH0 Ta |                 |         |   | 3e-006 | 10.2  | 0.0      | 0         |     |       |       |
| 19287468 - 1                       | K.NTLYLQMNSLR.A | 1352.70 | 2 | 3e-006 | 4.027 | 0.643    | 1526.5    | 1   | 20/30 | 39    |

1 of 1 peptide matches reported, 0 removed due to filtering

DTA for scans: 19287468-1  
Precursor ion: 676.85  
Mass type: mono  
Mod's: (M\* +15.99492) C=161.01468

Ion series for charge: +1

| AA | A ions        | B ions         | B* ions | Bo ions | C ions | Y ions         | Y* ions | Yo ions | Z ions |
|----|---------------|----------------|---------|---------|--------|----------------|---------|---------|--------|
| N  | 87.06         | 115.05         |         |         |        |                |         |         |        |
| T  | 188.10        | <b>216.10</b>  |         |         |        | 1238.66        |         |         |        |
| L  | <b>301.19</b> | <b>329.18</b>  |         |         |        | <b>1137.61</b> |         |         |        |
| Y  | <b>464.25</b> | <b>492.25</b>  |         |         |        | <b>1024.52</b> |         |         |        |
| L  | <b>577.33</b> | <b>605.33</b>  |         |         |        | <b>861.46</b>  |         |         |        |
| Q  | 705.39        | <b>733.39</b>  |         |         |        | <b>748.38</b>  |         |         |        |
| M  | 836.43        | <b>864.43</b>  |         |         |        | <b>620.32</b>  |         |         |        |
| N  | 950.48        | <b>978.47</b>  |         |         |        | <b>489.28</b>  |         |         |        |
| S  | 1037.51       | <b>1065.50</b> |         |         |        | <b>375.24</b>  |         |         |        |
| L  | 1150.59       | <b>1178.59</b> |         |         |        | <b>288.20</b>  |         |         |        |
| R  |               |                |         |         |        | 175.12         |         |         |        |



#19287468-1 NL: 1.01E5



---

| Reference                          |                 |         |   | P      | Score | Coverage | Accession |     |       |       |
|------------------------------------|-----------------|---------|---|--------|-------|----------|-----------|-----|-------|-------|
| Scan(s)                            | Sequence        | MH+     | z | P      | XC    | DeltaCn  | Sp        | RSp | Ions  | Count |
| IPI:IPI00784513.1 TREMBL:Q0ZCI3 Ta |                 |         |   | 3e-006 | 10.2  | 0.0      |           | 0   |       |       |
| 19287468 - 1                       | K.NTLYLQMNSLR.A | 1352.70 | 2 | 3e-006 | 4.027 | 0.643    | 1526.5    | 1   | 20/30 | 39    |

1 of 1 peptide matches reported, 0 removed due to filtering

DTA for scans: 19287468-1  
Precursor ion: 676.85  
Mass type: mono  
Mod's: (M\* +15.99492) C=161.01468

Ion series for charge: +1

| AA | A ions        | B ions         | B* ions | Bo ions | C ions | Y ions         | Y* ions | Yo ions | Z ions |
|----|---------------|----------------|---------|---------|--------|----------------|---------|---------|--------|
| N  | 87.06         | 115.05         |         |         |        |                |         |         |        |
| T  | 188.10        | <b>216.10</b>  |         |         |        | 1238.66        |         |         |        |
| L  | <b>301.19</b> | <b>329.18</b>  |         |         |        | <b>1137.61</b> |         |         |        |
| Y  | <b>464.25</b> | <b>492.25</b>  |         |         |        | <b>1024.52</b> |         |         |        |
| L  | <b>577.33</b> | <b>605.33</b>  |         |         |        | <b>861.46</b>  |         |         |        |
| Q  | 705.39        | <b>733.39</b>  |         |         |        | <b>748.38</b>  |         |         |        |
| M  | 836.43        | <b>864.43</b>  |         |         |        | <b>620.32</b>  |         |         |        |
| N  | 950.48        | <b>978.47</b>  |         |         |        | <b>489.28</b>  |         |         |        |
| S  | 1037.51       | <b>1065.50</b> |         |         |        | <b>375.24</b>  |         |         |        |
| L  | 1150.59       | <b>1178.59</b> |         |         |        | <b>288.20</b>  |         |         |        |
| R  |               |                |         |         |        | 175.12         |         |         |        |



#19287468-1 NL: 1.01E5





---

| Reference                          |                 |         |   | P      | Score | Coverage | Accession |     |       |       |
|------------------------------------|-----------------|---------|---|--------|-------|----------|-----------|-----|-------|-------|
| Scan(s)                            | Sequence        | MH+     | z | P      | XC    | DeltaCn  | Sp        | RSp | Ions  | Count |
| IPI:IPI00827581.1 TREMBL:A2NZ55 Ta |                 |         |   | 3e-006 | 10.2  | 0.0      | 0         |     |       |       |
| 19287468 - 1                       | K.NTLYLQMNSLR.A | 1352.70 | 2 | 3e-006 | 4.027 | 0.643    | 1526.5    | 1   | 20/30 | 39    |

1 of 1 peptide matches reported, 0 removed due to filtering

DTA for scans: 19287468-1  
Precursor ion: 676.85  
Mass type: mono  
Mod's: (M\* +15.99492) C=161.01468

Ion series for charge: +1

| AA | A ions        | B ions         | B* ions | Bo ions | C ions | Y ions         | Y* ions | Yo ions | Z ions |
|----|---------------|----------------|---------|---------|--------|----------------|---------|---------|--------|
| N  | 87.06         | 115.05         |         |         |        |                |         |         |        |
| T  | 188.10        | <b>216.10</b>  |         |         |        | 1238.66        |         |         |        |
| L  | <b>301.19</b> | <b>329.18</b>  |         |         |        | <b>1137.61</b> |         |         |        |
| Y  | <b>464.25</b> | <b>492.25</b>  |         |         |        | <b>1024.52</b> |         |         |        |
| L  | <b>577.33</b> | <b>605.33</b>  |         |         |        | <b>861.46</b>  |         |         |        |
| Q  | 705.39        | <b>733.39</b>  |         |         |        | <b>748.38</b>  |         |         |        |
| M  | 836.43        | <b>864.43</b>  |         |         |        | <b>620.32</b>  |         |         |        |
| N  | 950.48        | <b>978.47</b>  |         |         |        | <b>489.28</b>  |         |         |        |
| S  | 1037.51       | <b>1065.50</b> |         |         |        | <b>375.24</b>  |         |         |        |
| L  | 1150.59       | <b>1178.59</b> |         |         |        | <b>288.20</b>  |         |         |        |
| R  |               |                |         |         |        | 175.12         |         |         |        |



#19287468-1 NL: 1.01E5



---

| Reference                          |                 |         |   | P      | Score | Coverage | Accession |     |       |       |
|------------------------------------|-----------------|---------|---|--------|-------|----------|-----------|-----|-------|-------|
| Scan(s)                            | Sequence        | MH+     | z | P      | XC    | DeltaCn  | Sp        | RSp | Ions  | Count |
| IPI:IPI00827589.1 TREMBL:A2NXP8 Ta |                 |         |   | 3e-006 | 10.2  | 0.0      | 0         |     |       |       |
| 19287468 - 1                       | K.NTLYLQMNSLR.A | 1352.70 | 2 | 3e-006 | 4.027 | 0.643    | 1526.5    | 1   | 20/30 | 39    |

1 of 1 peptide matches reported, 0 removed due to filtering

DTA for scans: 19287468-1  
Precursor ion: 676.85  
Mass type: mono  
Mod's: (M\* +15.99492) C=161.01468

Ion series for charge: +1

| AA | A ions        | B ions         | B* ions | Bo ions | C ions | Y ions         | Y* ions | Yo ions | Z ions |
|----|---------------|----------------|---------|---------|--------|----------------|---------|---------|--------|
| N  | 87.06         | 115.05         |         |         |        |                |         |         |        |
| T  | 188.10        | <b>216.10</b>  |         |         |        | 1238.66        |         |         |        |
| L  | <b>301.19</b> | <b>329.18</b>  |         |         |        | <b>1137.61</b> |         |         |        |
| Y  | <b>464.25</b> | <b>492.25</b>  |         |         |        | <b>1024.52</b> |         |         |        |
| L  | <b>577.33</b> | <b>605.33</b>  |         |         |        | <b>861.46</b>  |         |         |        |
| Q  | 705.39        | <b>733.39</b>  |         |         |        | <b>748.38</b>  |         |         |        |
| M  | 836.43        | <b>864.43</b>  |         |         |        | <b>620.32</b>  |         |         |        |
| N  | 950.48        | <b>978.47</b>  |         |         |        | <b>489.28</b>  |         |         |        |
| S  | 1037.51       | <b>1065.50</b> |         |         |        | <b>375.24</b>  |         |         |        |
| L  | 1150.59       | <b>1178.59</b> |         |         |        | <b>288.20</b>  |         |         |        |
| R  |               |                |         |         |        | 175.12         |         |         |        |



#19287468-1 NL: 1.01E5



---

| Reference                          |                 |         |   | P      | Score | Coverage | Accession |     |       |       |
|------------------------------------|-----------------|---------|---|--------|-------|----------|-----------|-----|-------|-------|
| Scan(s)                            | Sequence        | MH+     | z | P      | XC    | DeltaCn  | Sp        | RSp | Ions  | Count |
| IPI:IPI00827678.1 TREMBL:A2NWX5 Ta |                 |         |   | 3e-006 | 10.2  | 0.0      | 0         |     |       |       |
| 19287468 - 1                       | K.NTLYLQMNSLR.A | 1352.70 | 2 | 3e-006 | 4.027 | 0.643    | 1526.5    | 1   | 20/30 | 39    |

1 of 1 peptide matches reported, 0 removed due to filtering

DTA for scans: 19287468-1  
Precursor ion: 676.85  
Mass type: mono  
Mod's: (M\* +15.99492) C=161.01468

Ion series for charge: +1

| AA | A ions        | B ions         | B* ions | Bo ions | C ions | Y ions         | Y* ions | Yo ions | Z ions |
|----|---------------|----------------|---------|---------|--------|----------------|---------|---------|--------|
| N  | 87.06         | 115.05         |         |         |        |                |         |         |        |
| T  | 188.10        | <b>216.10</b>  |         |         |        | 1238.66        |         |         |        |
| L  | <b>301.19</b> | <b>329.18</b>  |         |         |        | <b>1137.61</b> |         |         |        |
| Y  | <b>464.25</b> | <b>492.25</b>  |         |         |        | <b>1024.52</b> |         |         |        |
| L  | <b>577.33</b> | <b>605.33</b>  |         |         |        | <b>861.46</b>  |         |         |        |
| Q  | 705.39        | <b>733.39</b>  |         |         |        | <b>748.38</b>  |         |         |        |
| M  | 836.43        | <b>864.43</b>  |         |         |        | <b>620.32</b>  |         |         |        |
| N  | 950.48        | <b>978.47</b>  |         |         |        | <b>489.28</b>  |         |         |        |
| S  | 1037.51       | <b>1065.50</b> |         |         |        | <b>375.24</b>  |         |         |        |
| L  | 1150.59       | <b>1178.59</b> |         |         |        | <b>288.20</b>  |         |         |        |
| R  |               |                |         |         |        | 175.12         |         |         |        |





#19287468-1 NL: 1.01E5



---

| Reference                          |                 |         |   | P      | Score | Coverage | Accession |     |       |       |
|------------------------------------|-----------------|---------|---|--------|-------|----------|-----------|-----|-------|-------|
| Scan(s)                            | Sequence        | MH+     | z | P      | XC    | DeltaCn  | Sp        | RSp | Ions  | Count |
| IPI:IPI00827814.1 TREMBL:A2NWX1 Ta |                 |         |   | 3e-006 | 10.2  | 0.0      | 0         |     |       |       |
| 19287468 - 1                       | K.NTLYLQMNSLR.A | 1352.70 | 2 | 3e-006 | 4.027 | 0.643    | 1526.5    | 1   | 20/30 | 39    |

1 of 1 peptide matches reported, 0 removed due to filtering

DTA for scans: 19287468-1  
Precursor ion: 676.85  
Mass type: mono  
Mod's: (M\* +15.99492) C=161.01468

Ion series for charge: +1

| AA | A ions        | B ions         | B* ions | Bo ions | C ions | Y ions         | Y* ions | Yo ions | Z ions |
|----|---------------|----------------|---------|---------|--------|----------------|---------|---------|--------|
| N  | 87.06         | 115.05         |         |         |        |                |         |         |        |
| T  | 188.10        | <b>216.10</b>  |         |         |        | 1238.66        |         |         |        |
| L  | <b>301.19</b> | <b>329.18</b>  |         |         |        | <b>1137.61</b> |         |         |        |
| Y  | <b>464.25</b> | <b>492.25</b>  |         |         |        | <b>1024.52</b> |         |         |        |
| L  | <b>577.33</b> | <b>605.33</b>  |         |         |        | <b>861.46</b>  |         |         |        |
| Q  | 705.39        | <b>733.39</b>  |         |         |        | <b>748.38</b>  |         |         |        |
| M  | 836.43        | <b>864.43</b>  |         |         |        | <b>620.32</b>  |         |         |        |
| N  | 950.48        | <b>978.47</b>  |         |         |        | <b>489.28</b>  |         |         |        |
| S  | 1037.51       | <b>1065.50</b> |         |         |        | <b>375.24</b>  |         |         |        |
| L  | 1150.59       | <b>1178.59</b> |         |         |        | <b>288.20</b>  |         |         |        |
| R  |               |                |         |         |        | 175.12         |         |         |        |



#19287468-1 NL: 1.01E5



---

| Reference                          |                 |         |   | P      | Score | Coverage | Accession |     |       |       |
|------------------------------------|-----------------|---------|---|--------|-------|----------|-----------|-----|-------|-------|
| Scan(s)                            | Sequence        | MH+     | z | P      | XC    | DeltaCn  | Sp        | RSp | Ions  | Count |
| IPI:IPI00827929.1 TREMBL:A2NWW9 Ta |                 |         |   | 3e-006 | 10.2  | 0.0      |           | 0   |       |       |
| 19287468 - 1                       | K.NTLYLQMNSLR.A | 1352.70 | 2 | 3e-006 | 4.027 | 0.643    | 1526.5    | 1   | 20/30 | 39    |

1 of 1 peptide matches reported, 0 removed due to filtering

DTA for scans: 19287468-1  
Precursor ion: 676.85  
Mass type: mono  
Mod's: (M\* +15.99492) C=161.01468

Ion series for charge: +1

| AA | A ions        | B ions         | B* ions | Bo ions | C ions | Y ions         | Y* ions | Yo ions | Z ions |
|----|---------------|----------------|---------|---------|--------|----------------|---------|---------|--------|
| N  | 87.06         | 115.05         |         |         |        |                |         |         |        |
| T  | 188.10        | <b>216.10</b>  |         |         |        | 1238.66        |         |         |        |
| L  | <b>301.19</b> | <b>329.18</b>  |         |         |        | <b>1137.61</b> |         |         |        |
| Y  | <b>464.25</b> | <b>492.25</b>  |         |         |        | <b>1024.52</b> |         |         |        |
| L  | <b>577.33</b> | <b>605.33</b>  |         |         |        | <b>861.46</b>  |         |         |        |
| Q  | 705.39        | <b>733.39</b>  |         |         |        | <b>748.38</b>  |         |         |        |
| M  | 836.43        | <b>864.43</b>  |         |         |        | <b>620.32</b>  |         |         |        |
| N  | 950.48        | <b>978.47</b>  |         |         |        | <b>489.28</b>  |         |         |        |
| S  | 1037.51       | <b>1065.50</b> |         |         |        | <b>375.24</b>  |         |         |        |
| L  | 1150.59       | <b>1178.59</b> |         |         |        | <b>288.20</b>  |         |         |        |
| R  |               |                |         |         |        | 175.12         |         |         |        |



#19287468-1 NL: 1.01E5



---

| Reference                          |                 |         |   | P      | Score | Coverage | Accession |     |       |       |
|------------------------------------|-----------------|---------|---|--------|-------|----------|-----------|-----|-------|-------|
| Scan(s)                            | Sequence        | MH+     | z | P      | XC    | DeltaCn  | Sp        | RSp | Ions  | Count |
| IPI:IPI00827938.1 TREMBL:A2NWW5 Ta |                 |         |   | 3e-006 | 10.2  | 0.0      |           | 0   |       |       |
| 19287468 - 1                       | K.NTLYLQMNSLR.A | 1352.70 | 2 | 3e-006 | 4.027 | 0.643    | 1526.5    | 1   | 20/30 | 39    |

1 of 1 peptide matches reported, 0 removed due to filtering



DTA for scans: 19287468-1  
Precursor ion: 676.85  
Mass type: mono  
Mod's: (M\* +15.99492) C=161.01468

Ion series for charge: +1

| AA | A ions        | B ions         | B* ions | Bo ions | C ions | Y ions         | Y* ions | Yo ions | Z ions |
|----|---------------|----------------|---------|---------|--------|----------------|---------|---------|--------|
| N  | 87.06         | 115.05         |         |         |        |                |         |         |        |
| T  | 188.10        | <b>216.10</b>  |         |         |        | 1238.66        |         |         |        |
| L  | <b>301.19</b> | <b>329.18</b>  |         |         |        | <b>1137.61</b> |         |         |        |
| Y  | <b>464.25</b> | <b>492.25</b>  |         |         |        | <b>1024.52</b> |         |         |        |
| L  | <b>577.33</b> | <b>605.33</b>  |         |         |        | <b>861.46</b>  |         |         |        |
| Q  | 705.39        | <b>733.39</b>  |         |         |        | <b>748.38</b>  |         |         |        |
| M  | 836.43        | <b>864.43</b>  |         |         |        | <b>620.32</b>  |         |         |        |
| N  | 950.48        | <b>978.47</b>  |         |         |        | <b>489.28</b>  |         |         |        |
| S  | 1037.51       | <b>1065.50</b> |         |         |        | <b>375.24</b>  |         |         |        |
| L  | 1150.59       | <b>1178.59</b> |         |         |        | <b>288.20</b>  |         |         |        |
| R  |               |                |         |         |        | 175.12         |         |         |        |



#19287468-1 NL: 1.01E5



---

| Reference                          |                 |         |   | P      | Score | Coverage | Accession |     |       |       |
|------------------------------------|-----------------|---------|---|--------|-------|----------|-----------|-----|-------|-------|
| Scan(s)                            | Sequence        | MH+     | z | P      | XC    | DeltaCn  | Sp        | RSp | Ions  | Count |
| IPI:IPI00827940.1 SWISS-PROT:P0176 |                 |         |   | 3e-006 | 10.2  | 0.0      |           | 0   |       |       |
| 19287468 - 1                       | K.NTLYLQMNSLR.A | 1352.70 | 2 | 3e-006 | 4.027 | 0.643    | 1526.5    | 1   | 20/30 | 39    |

1 of 1 peptide matches reported, 0 removed due to filtering

DTA for scans: 19287468-1  
Precursor ion: 676.85  
Mass type: mono  
Mod's: (M\* +15.99492) C=161.01468

Ion series for charge: +1

| AA | A ions        | B ions         | B* ions | Bo ions | C ions | Y ions         | Y* ions | Yo ions | Z ions |
|----|---------------|----------------|---------|---------|--------|----------------|---------|---------|--------|
| N  | 87.06         | 115.05         |         |         |        |                |         |         |        |
| T  | 188.10        | <b>216.10</b>  |         |         |        | 1238.66        |         |         |        |
| L  | <b>301.19</b> | <b>329.18</b>  |         |         |        | <b>1137.61</b> |         |         |        |
| Y  | <b>464.25</b> | <b>492.25</b>  |         |         |        | <b>1024.52</b> |         |         |        |
| L  | <b>577.33</b> | <b>605.33</b>  |         |         |        | <b>861.46</b>  |         |         |        |
| Q  | 705.39        | <b>733.39</b>  |         |         |        | <b>748.38</b>  |         |         |        |
| M  | 836.43        | <b>864.43</b>  |         |         |        | <b>620.32</b>  |         |         |        |
| N  | 950.48        | <b>978.47</b>  |         |         |        | <b>489.28</b>  |         |         |        |
| S  | 1037.51       | <b>1065.50</b> |         |         |        | <b>375.24</b>  |         |         |        |
| L  | 1150.59       | <b>1178.59</b> |         |         |        | <b>288.20</b>  |         |         |        |
| R  |               |                |         |         |        | 175.12         |         |         |        |



#19287468-1 NL: 1.01E5



---

| Reference                          |                 |         |   | P      | Score | Coverage | Accession |     |       |       |
|------------------------------------|-----------------|---------|---|--------|-------|----------|-----------|-----|-------|-------|
| Scan(s)                            | Sequence        | MH+     | z | P      | XC    | DeltaCn  | Sp        | RSp | Ions  | Count |
| IPI:IPI00827989.1 TREMBL:A2NWW6 Ta |                 |         |   | 3e-006 | 10.2  | 0.0      | 0         |     |       |       |
| 19287468 - 1                       | K.NTLYLQMNSLR.A | 1352.70 | 2 | 3e-006 | 4.027 | 0.643    | 1526.5    | 1   | 20/30 | 39    |

1 of 1 peptide matches reported, 0 removed due to filtering

DTA for scans: 19287468-1  
Precursor ion: 676.85  
Mass type: mono  
Mod's: (M\* +15.99492) C=161.01468

Ion series for charge: +1

| AA | A ions        | B ions         | B* ions | Bo ions | C ions | Y ions         | Y* ions | Yo ions | Z ions |
|----|---------------|----------------|---------|---------|--------|----------------|---------|---------|--------|
| N  | 87.06         | 115.05         |         |         |        |                |         |         |        |
| T  | 188.10        | <b>216.10</b>  |         |         |        | 1238.66        |         |         |        |
| L  | <b>301.19</b> | <b>329.18</b>  |         |         |        | <b>1137.61</b> |         |         |        |
| Y  | <b>464.25</b> | <b>492.25</b>  |         |         |        | <b>1024.52</b> |         |         |        |
| L  | <b>577.33</b> | <b>605.33</b>  |         |         |        | <b>861.46</b>  |         |         |        |
| Q  | 705.39        | <b>733.39</b>  |         |         |        | <b>748.38</b>  |         |         |        |
| M  | 836.43        | <b>864.43</b>  |         |         |        | <b>620.32</b>  |         |         |        |
| N  | 950.48        | <b>978.47</b>  |         |         |        | <b>489.28</b>  |         |         |        |
| S  | 1037.51       | <b>1065.50</b> |         |         |        | <b>375.24</b>  |         |         |        |
| L  | 1150.59       | <b>1178.59</b> |         |         |        | <b>288.20</b>  |         |         |        |
| R  |               |                |         |         |        | 175.12         |         |         |        |



#19287468-1 NL: 1.01E5

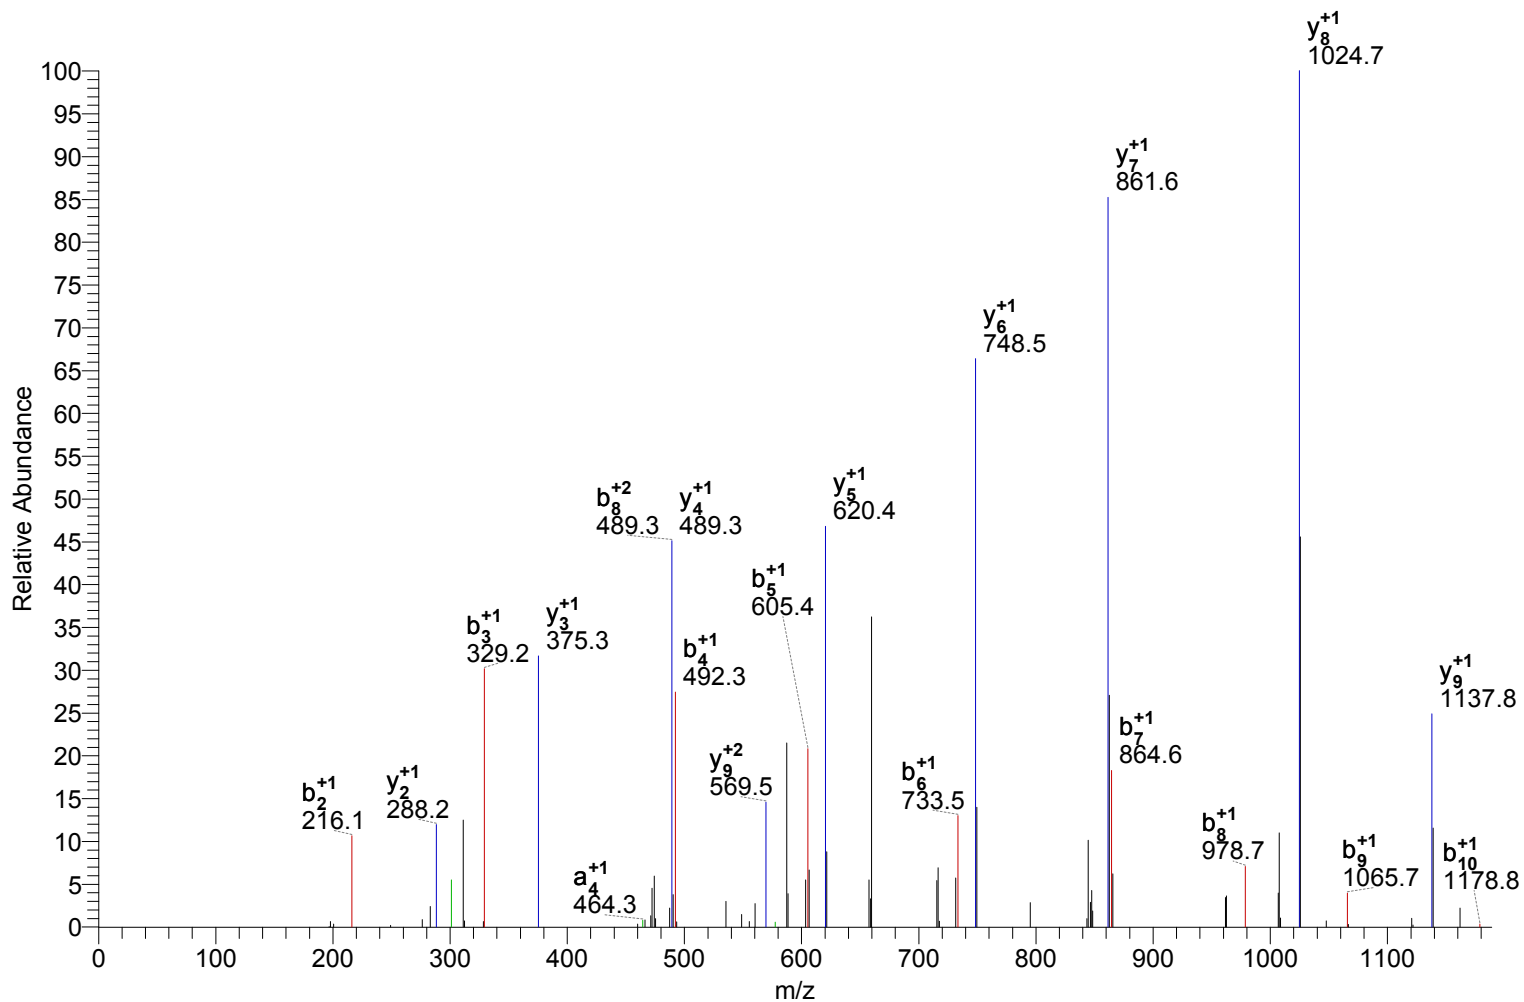



---

| Reference                          |                 |         |   | P      | Score | Coverage | Accession |     |       |       |
|------------------------------------|-----------------|---------|---|--------|-------|----------|-----------|-----|-------|-------|
| Scan(s)                            | Sequence        | MH+     | z | P      | XC    | DeltaCn  | Sp        | RSp | Ions  | Count |
| IPI:IPI00828022.1 TREMBL:A2NWW7 Ta |                 |         |   | 3e-006 | 10.2  | 0.0      | 0         |     |       |       |
| 19287468 - 1                       | K.NTLYLQMNSLR.A | 1352.70 | 2 | 3e-006 | 4.027 | 0.643    | 1526.5    | 1   | 20/30 | 39    |

1 of 1 peptide matches reported, 0 removed due to filtering

DTA for scans: 19287468-1  
Precursor ion: 676.85  
Mass type: mono  
Mod's: (M\* +15.99492) C=161.01468

Ion series for charge: +1

| AA | A ions        | B ions         | B* ions | Bo ions | C ions | Y ions         | Y* ions | Yo ions | Z ions |
|----|---------------|----------------|---------|---------|--------|----------------|---------|---------|--------|
| N  | 87.06         | 115.05         |         |         |        |                |         |         |        |
| T  | 188.10        | <b>216.10</b>  |         |         |        | 1238.66        |         |         |        |
| L  | <b>301.19</b> | <b>329.18</b>  |         |         |        | <b>1137.61</b> |         |         |        |
| Y  | <b>464.25</b> | <b>492.25</b>  |         |         |        | <b>1024.52</b> |         |         |        |
| L  | <b>577.33</b> | <b>605.33</b>  |         |         |        | <b>861.46</b>  |         |         |        |
| Q  | 705.39        | <b>733.39</b>  |         |         |        | <b>748.38</b>  |         |         |        |
| M  | 836.43        | <b>864.43</b>  |         |         |        | <b>620.32</b>  |         |         |        |
| N  | 950.48        | <b>978.47</b>  |         |         |        | <b>489.28</b>  |         |         |        |
| S  | 1037.51       | <b>1065.50</b> |         |         |        | <b>375.24</b>  |         |         |        |
| L  | 1150.59       | <b>1178.59</b> |         |         |        | <b>288.20</b>  |         |         |        |
| R  |               |                |         |         |        | 175.12         |         |         |        |



#19287468-1 NL: 1.01E5



---

| Reference                          |                 |         |   | P      | Score | Coverage | Accession |     |       |       |
|------------------------------------|-----------------|---------|---|--------|-------|----------|-----------|-----|-------|-------|
| Scan(s)                            | Sequence        | MH+     | z | P      | XC    | DeltaCn  | Sp        | RSp | Ions  | Count |
| IPI:IPI00828061.1 TREMBL:A2JA14 Ta |                 |         |   | 3e-006 | 10.2  | 0.0      | 0         |     |       |       |
| 19287468 - 1                       | K.NTLYLQMNSLR.A | 1352.70 | 2 | 3e-006 | 4.027 | 0.643    | 1526.5    | 1   | 20/30 | 39    |

1 of 1 peptide matches reported, 0 removed due to filtering

DTA for scans: 19287468-1  
Precursor ion: 676.85  
Mass type: mono  
Mod's: (M\* +15.99492) C=161.01468

Ion series for charge: +1

| AA | A ions        | B ions         | B* ions | Bo ions | C ions | Y ions         | Y* ions | Yo ions | Z ions |
|----|---------------|----------------|---------|---------|--------|----------------|---------|---------|--------|
| N  | 87.06         | 115.05         |         |         |        |                |         |         |        |
| T  | 188.10        | <b>216.10</b>  |         |         |        | 1238.66        |         |         |        |
| L  | <b>301.19</b> | <b>329.18</b>  |         |         |        | <b>1137.61</b> |         |         |        |
| Y  | <b>464.25</b> | <b>492.25</b>  |         |         |        | <b>1024.52</b> |         |         |        |
| L  | <b>577.33</b> | <b>605.33</b>  |         |         |        | <b>861.46</b>  |         |         |        |
| Q  | 705.39        | <b>733.39</b>  |         |         |        | <b>748.38</b>  |         |         |        |
| M  | 836.43        | <b>864.43</b>  |         |         |        | <b>620.32</b>  |         |         |        |
| N  | 950.48        | <b>978.47</b>  |         |         |        | <b>489.28</b>  |         |         |        |
| S  | 1037.51       | <b>1065.50</b> |         |         |        | <b>375.24</b>  |         |         |        |
| L  | 1150.59       | <b>1178.59</b> |         |         |        | <b>288.20</b>  |         |         |        |
| R  |               |                |         |         |        | 175.12         |         |         |        |



#19287468-1 NL: 1.01E5



---

| Reference                          |                 |         |   | P      | Score | Coverage | Accession |     |       |       |
|------------------------------------|-----------------|---------|---|--------|-------|----------|-----------|-----|-------|-------|
| Scan(s)                            | Sequence        | MH+     | z | P      | XC    | DeltaCn  | Sp        | RSp | Ions  | Count |
| IPI:IPI00828085.1 TREMBL:A2NWW4 Ta |                 |         |   | 3e-006 | 10.2  | 0.0      | 0         |     |       |       |
| 19287468 - 1                       | K.NTLYLQMNSLR.A | 1352.70 | 2 | 3e-006 | 4.027 | 0.643    | 1526.5    | 1   | 20/30 | 39    |

1 of 1 peptide matches reported, 0 removed due to filtering

DTA for scans: 19287468-1  
Precursor ion: 676.85  
Mass type: mono  
Mod's: (M\* +15.99492) C=161.01468

Ion series for charge: +1

| AA | A ions        | B ions         | B* ions | Bo ions | C ions | Y ions         | Y* ions | Yo ions | Z ions |
|----|---------------|----------------|---------|---------|--------|----------------|---------|---------|--------|
| N  | 87.06         | 115.05         |         |         |        |                |         |         |        |
| T  | 188.10        | <b>216.10</b>  |         |         |        | 1238.66        |         |         |        |
| L  | <b>301.19</b> | <b>329.18</b>  |         |         |        | <b>1137.61</b> |         |         |        |
| Y  | <b>464.25</b> | <b>492.25</b>  |         |         |        | <b>1024.52</b> |         |         |        |
| L  | <b>577.33</b> | <b>605.33</b>  |         |         |        | <b>861.46</b>  |         |         |        |
| Q  | 705.39        | <b>733.39</b>  |         |         |        | <b>748.38</b>  |         |         |        |
| M  | 836.43        | <b>864.43</b>  |         |         |        | <b>620.32</b>  |         |         |        |
| N  | 950.48        | <b>978.47</b>  |         |         |        | <b>489.28</b>  |         |         |        |
| S  | 1037.51       | <b>1065.50</b> |         |         |        | <b>375.24</b>  |         |         |        |
| L  | 1150.59       | <b>1178.59</b> |         |         |        | <b>288.20</b>  |         |         |        |
| R  |               |                |         |         |        | 175.12         |         |         |        |





#19287468-1 NL: 1.01E5



---

| Reference                          |                 |         |   | P      | Score | Coverage | Accession |     |       |       |
|------------------------------------|-----------------|---------|---|--------|-------|----------|-----------|-----|-------|-------|
| Scan(s)                            | Sequence        | MH+     | z | P      | XC    | DeltaCn  | Sp        | RSp | Ions  | Count |
| IPI:IPI00828099.1 TREMBL:A2KUC3 Ta |                 |         |   | 3e-006 | 10.2  | 0.0      |           | 0   |       |       |
| 19287468 - 1                       | K.NTLYLQMNSLR.A | 1352.70 | 2 | 3e-006 | 4.027 | 0.643    | 1526.5    | 1   | 20/30 | 39    |

1 of 1 peptide matches reported, 0 removed due to filtering

DTA for scans: 19287468-1  
Precursor ion: 676.85  
Mass type: mono  
Mod's: (M\* +15.99492) C=161.01468

Ion series for charge: +1

| AA | A ions        | B ions         | B* ions | Bo ions | C ions | Y ions         | Y* ions | Yo ions | Z ions |
|----|---------------|----------------|---------|---------|--------|----------------|---------|---------|--------|
| N  | 87.06         | 115.05         |         |         |        |                |         |         |        |
| T  | 188.10        | <b>216.10</b>  |         |         |        | 1238.66        |         |         |        |
| L  | <b>301.19</b> | <b>329.18</b>  |         |         |        | <b>1137.61</b> |         |         |        |
| Y  | <b>464.25</b> | <b>492.25</b>  |         |         |        | <b>1024.52</b> |         |         |        |
| L  | <b>577.33</b> | <b>605.33</b>  |         |         |        | <b>861.46</b>  |         |         |        |
| Q  | 705.39        | <b>733.39</b>  |         |         |        | <b>748.38</b>  |         |         |        |
| M  | 836.43        | <b>864.43</b>  |         |         |        | <b>620.32</b>  |         |         |        |
| N  | 950.48        | <b>978.47</b>  |         |         |        | <b>489.28</b>  |         |         |        |
| S  | 1037.51       | <b>1065.50</b> |         |         |        | <b>375.24</b>  |         |         |        |
| L  | 1150.59       | <b>1178.59</b> |         |         |        | <b>288.20</b>  |         |         |        |
| R  |               |                |         |         |        | 175.12         |         |         |        |



#19287468-1 NL: 1.01E5



---

| Reference                          |                 |         |   | P      | Score | Coverage | Accession |     |       |       |
|------------------------------------|-----------------|---------|---|--------|-------|----------|-----------|-----|-------|-------|
| Scan(s)                            | Sequence        | MH+     | z | P      | XC    | DeltaCn  | Sp        | RSp | Ions  | Count |
| IPI:IPI00828105.1 TREMBL:A2J423 Ta |                 |         |   | 3e-006 | 10.2  | 0.0      | 0         |     |       |       |
| 19287468 - 1                       | K.NTLYLQMNSLR.A | 1352.70 | 2 | 3e-006 | 4.027 | 0.643    | 1526.5    | 1   | 20/30 | 39    |

1 of 1 peptide matches reported, 0 removed due to filtering

DTA for scans: 19287468-1  
Precursor ion: 676.85  
Mass type: mono  
Mod's: (M\* +15.99492) C=161.01468

Ion series for charge: +1

| AA | A ions        | B ions         | B* ions | Bo ions | C ions | Y ions         | Y* ions | Yo ions | Z ions |
|----|---------------|----------------|---------|---------|--------|----------------|---------|---------|--------|
| N  | 87.06         | 115.05         |         |         |        |                |         |         |        |
| T  | 188.10        | <b>216.10</b>  |         |         |        | 1238.66        |         |         |        |
| L  | <b>301.19</b> | <b>329.18</b>  |         |         |        | <b>1137.61</b> |         |         |        |
| Y  | <b>464.25</b> | <b>492.25</b>  |         |         |        | <b>1024.52</b> |         |         |        |
| L  | <b>577.33</b> | <b>605.33</b>  |         |         |        | <b>861.46</b>  |         |         |        |
| Q  | 705.39        | <b>733.39</b>  |         |         |        | <b>748.38</b>  |         |         |        |
| M  | 836.43        | <b>864.43</b>  |         |         |        | <b>620.32</b>  |         |         |        |
| N  | 950.48        | <b>978.47</b>  |         |         |        | <b>489.28</b>  |         |         |        |
| S  | 1037.51       | <b>1065.50</b> |         |         |        | <b>375.24</b>  |         |         |        |
| L  | 1150.59       | <b>1178.59</b> |         |         |        | <b>288.20</b>  |         |         |        |
| R  |               |                |         |         |        | 175.12         |         |         |        |



#19287468-1 NL: 1.01E5



---

| Reference                          |                 |         |   | P      | Score | Coverage | Accession |     |       |       |
|------------------------------------|-----------------|---------|---|--------|-------|----------|-----------|-----|-------|-------|
| Scan(s)                            | Sequence        | MH+     | z | P      | XC    | DeltaCn  | Sp        | RSp | Ions  | Count |
| IPI:IPI00828153.1 TREMBL:A2NWW1 Ta |                 |         |   | 3e-006 | 10.2  | 0.0      | 0         |     |       |       |
| 19287468 - 1                       | K.NTLYLQMNSLR.A | 1352.70 | 2 | 3e-006 | 4.027 | 0.643    | 1526.5    | 1   | 20/30 | 39    |

1 of 1 peptide matches reported, 0 removed due to filtering



DTA for scans: 19287468-1  
Precursor ion: 676.85  
Mass type: mono  
Mod's: (M\* +15.99492) C=161.01468

Ion series for charge: +1

| AA | A ions        | B ions         | B* ions | Bo ions | C ions | Y ions         | Y* ions | Yo ions | Z ions |
|----|---------------|----------------|---------|---------|--------|----------------|---------|---------|--------|
| N  | 87.06         | 115.05         |         |         |        |                |         |         |        |
| T  | 188.10        | <b>216.10</b>  |         |         |        | 1238.66        |         |         |        |
| L  | <b>301.19</b> | <b>329.18</b>  |         |         |        | <b>1137.61</b> |         |         |        |
| Y  | <b>464.25</b> | <b>492.25</b>  |         |         |        | <b>1024.52</b> |         |         |        |
| L  | <b>577.33</b> | <b>605.33</b>  |         |         |        | <b>861.46</b>  |         |         |        |
| Q  | 705.39        | <b>733.39</b>  |         |         |        | <b>748.38</b>  |         |         |        |
| M  | 836.43        | <b>864.43</b>  |         |         |        | <b>620.32</b>  |         |         |        |
| N  | 950.48        | <b>978.47</b>  |         |         |        | <b>489.28</b>  |         |         |        |
| S  | 1037.51       | <b>1065.50</b> |         |         |        | <b>375.24</b>  |         |         |        |
| L  | 1150.59       | <b>1178.59</b> |         |         |        | <b>288.20</b>  |         |         |        |
| R  |               |                |         |         |        | 175.12         |         |         |        |



#19287468-1 NL: 1.01E5



---

| Reference                          |                 |         |   | P      | Score | Coverage | Accession |     |       |       |
|------------------------------------|-----------------|---------|---|--------|-------|----------|-----------|-----|-------|-------|
| Scan(s)                            | Sequence        | MH+     | z | P      | XC    | DeltaCn  | Sp        | RSp | Ions  | Count |
| IPI:IPI00829724.1 TREMBL:A6NFJ8 EN |                 |         |   | 3e-006 | 10.2  | 0.0      | 0         |     |       |       |
| 19287468 - 1                       | K.NTLYLQMNSLR.A | 1352.70 | 2 | 3e-006 | 4.027 | 0.643    | 1526.5    | 1   | 20/30 | 39    |

1 of 1 peptide matches reported, 0 removed due to filtering

DTA for scans: 19287468-1  
Precursor ion: 676.85  
Mass type: mono  
Mod's: (M\* +15.99492) C=161.01468

Ion series for charge: +1

| AA | A ions        | B ions         | B* ions | Bo ions | C ions | Y ions         | Y* ions | Yo ions | Z ions |
|----|---------------|----------------|---------|---------|--------|----------------|---------|---------|--------|
| N  | 87.06         | 115.05         |         |         |        |                |         |         |        |
| T  | 188.10        | <b>216.10</b>  |         |         |        | 1238.66        |         |         |        |
| L  | <b>301.19</b> | <b>329.18</b>  |         |         |        | <b>1137.61</b> |         |         |        |
| Y  | <b>464.25</b> | <b>492.25</b>  |         |         |        | <b>1024.52</b> |         |         |        |
| L  | <b>577.33</b> | <b>605.33</b>  |         |         |        | <b>861.46</b>  |         |         |        |
| Q  | 705.39        | <b>733.39</b>  |         |         |        | <b>748.38</b>  |         |         |        |
| M  | 836.43        | <b>864.43</b>  |         |         |        | <b>620.32</b>  |         |         |        |
| N  | 950.48        | <b>978.47</b>  |         |         |        | <b>489.28</b>  |         |         |        |
| S  | 1037.51       | <b>1065.50</b> |         |         |        | <b>375.24</b>  |         |         |        |
| L  | 1150.59       | <b>1178.59</b> |         |         |        | <b>288.20</b>  |         |         |        |
| R  |               |                |         |         |        | 175.12         |         |         |        |



#19287468-1 NL: 1.01E5



---

| Reference                          |                 |         |   | P      | Score | Coverage | Accession |     |       |       |
|------------------------------------|-----------------|---------|---|--------|-------|----------|-----------|-----|-------|-------|
| Scan(s)                            | Sequence        | MH+     | z | P      | XC    | DeltaCn  | Sp        | RSp | Ions  | Count |
| IPI:IPI00829747.2 ENSEMBL:ENSP0000 |                 |         |   | 3e-006 | 10.2  | 0.0      | 0         |     |       |       |
| 19287468 - 1                       | K.NTLYLQMNSLR.A | 1352.70 | 2 | 3e-006 | 4.027 | 0.643    | 1526.5    | 1   | 20/30 | 39    |

1 of 1 peptide matches reported, 0 removed due to filtering

DTA for scans: 19287468-1  
Precursor ion: 676.85  
Mass type: mono  
Mod's: (M\* +15.99492) C=161.01468

Ion series for charge: +1

| AA | A ions        | B ions         | B* ions | Bo ions | C ions | Y ions         | Y* ions | Yo ions | Z ions |
|----|---------------|----------------|---------|---------|--------|----------------|---------|---------|--------|
| N  | 87.06         | 115.05         |         |         |        |                |         |         |        |
| T  | 188.10        | <b>216.10</b>  |         |         |        | 1238.66        |         |         |        |
| L  | <b>301.19</b> | <b>329.18</b>  |         |         |        | <b>1137.61</b> |         |         |        |
| Y  | <b>464.25</b> | <b>492.25</b>  |         |         |        | <b>1024.52</b> |         |         |        |
| L  | <b>577.33</b> | <b>605.33</b>  |         |         |        | <b>861.46</b>  |         |         |        |
| Q  | 705.39        | <b>733.39</b>  |         |         |        | <b>748.38</b>  |         |         |        |
| M  | 836.43        | <b>864.43</b>  |         |         |        | <b>620.32</b>  |         |         |        |
| N  | 950.48        | <b>978.47</b>  |         |         |        | <b>489.28</b>  |         |         |        |
| S  | 1037.51       | <b>1065.50</b> |         |         |        | <b>375.24</b>  |         |         |        |
| L  | 1150.59       | <b>1178.59</b> |         |         |        | <b>288.20</b>  |         |         |        |
| R  |               |                |         |         |        | 175.12         |         |         |        |



#19287468-1 NL: 1.01E5





---

| Reference                          |                 |         |   | P      | Score | Coverage | Accession |     |       |       |
|------------------------------------|-----------------|---------|---|--------|-------|----------|-----------|-----|-------|-------|
| Scan(s)                            | Sequence        | MH+     | z | P      | XC    | DeltaCn  | Sp        | RSp | Ions  | Count |
| IPI:IPI00829806.1 TREMBL:Q0ZCH8;Q0 |                 |         |   | 3e-006 | 10.2  | 0.0      |           | 0   |       |       |
| 19287468 - 1                       | K.NTLYLQMNSLR.A | 1352.70 | 2 | 3e-006 | 4.027 | 0.643    | 1526.5    | 1   | 20/30 | 39    |

1 of 1 peptide matches reported, 0 removed due to filtering

DTA for scans: 19287468-1  
Precursor ion: 676.85  
Mass type: mono  
Mod's: (M\* +15.99492) C=161.01468

Ion series for charge: +1

| AA | A ions        | B ions         | B* ions | Bo ions | C ions | Y ions         | Y* ions | Yo ions | Z ions |
|----|---------------|----------------|---------|---------|--------|----------------|---------|---------|--------|
| N  | 87.06         | 115.05         |         |         |        |                |         |         |        |
| T  | 188.10        | <b>216.10</b>  |         |         |        | 1238.66        |         |         |        |
| L  | <b>301.19</b> | <b>329.18</b>  |         |         |        | <b>1137.61</b> |         |         |        |
| Y  | <b>464.25</b> | <b>492.25</b>  |         |         |        | <b>1024.52</b> |         |         |        |
| L  | <b>577.33</b> | <b>605.33</b>  |         |         |        | <b>861.46</b>  |         |         |        |
| Q  | 705.39        | <b>733.39</b>  |         |         |        | <b>748.38</b>  |         |         |        |
| M  | 836.43        | <b>864.43</b>  |         |         |        | <b>620.32</b>  |         |         |        |
| N  | 950.48        | <b>978.47</b>  |         |         |        | <b>489.28</b>  |         |         |        |
| S  | 1037.51       | <b>1065.50</b> |         |         |        | <b>375.24</b>  |         |         |        |
| L  | 1150.59       | <b>1178.59</b> |         |         |        | <b>288.20</b>  |         |         |        |
| R  |               |                |         |         |        | 175.12         |         |         |        |



#19287468-1 NL: 1.01E5



---

| Reference                          |                 |         |   | P      | Score | Coverage | Accession |     |       |       |
|------------------------------------|-----------------|---------|---|--------|-------|----------|-----------|-----|-------|-------|
| Scan(s)                            | Sequence        | MH+     | z | P      | XC    | DeltaCn  | Sp        | RSp | Ions  | Count |
| IPI:IPI00829976.1 TREMBL:A2N192 EN |                 |         |   | 3e-006 | 10.2  | 0.0      |           | 0   |       |       |
| 19287468 - 1                       | K.NTLYLQMNSLR.A | 1352.70 | 2 | 3e-006 | 4.027 | 0.643    | 1526.5    | 1   | 20/30 | 39    |

1 of 1 peptide matches reported, 0 removed due to filtering

DTA for scans: 19287468-1  
Precursor ion: 676.85  
Mass type: mono  
Mod's: (M\* +15.99492) C=161.01468

Ion series for charge: +1

| AA | A ions        | B ions         | B* ions | Bo ions | C ions | Y ions         | Y* ions | Yo ions | Z ions |
|----|---------------|----------------|---------|---------|--------|----------------|---------|---------|--------|
| N  | 87.06         | 115.05         |         |         |        |                |         |         |        |
| T  | 188.10        | <b>216.10</b>  |         |         |        | 1238.66        |         |         |        |
| L  | <b>301.19</b> | <b>329.18</b>  |         |         |        | <b>1137.61</b> |         |         |        |
| Y  | <b>464.25</b> | <b>492.25</b>  |         |         |        | <b>1024.52</b> |         |         |        |
| L  | <b>577.33</b> | <b>605.33</b>  |         |         |        | <b>861.46</b>  |         |         |        |
| Q  | 705.39        | <b>733.39</b>  |         |         |        | <b>748.38</b>  |         |         |        |
| M  | 836.43        | <b>864.43</b>  |         |         |        | <b>620.32</b>  |         |         |        |
| N  | 950.48        | <b>978.47</b>  |         |         |        | <b>489.28</b>  |         |         |        |
| S  | 1037.51       | <b>1065.50</b> |         |         |        | <b>375.24</b>  |         |         |        |
| L  | 1150.59       | <b>1178.59</b> |         |         |        | <b>288.20</b>  |         |         |        |
| R  |               |                |         |         |        | 175.12         |         |         |        |



#19287468-1 NL: 1.01E5



---

| Reference                          |                 |         |   | P      | Score | Coverage | Accession |     |       |       |
|------------------------------------|-----------------|---------|---|--------|-------|----------|-----------|-----|-------|-------|
| Scan(s)                            | Sequence        | MH+     | z | P      | XC    | DeltaCn  | Sp        | RSp | Ions  | Count |
| IPI:IPI00830088.1 ENSEMBL:ENSP0000 |                 |         |   | 3e-006 | 10.2  | 0.0      | 0         |     |       |       |
| 19287468 - 1                       | K.NTLYLQMNSLR.A | 1352.70 | 2 | 3e-006 | 4.027 | 0.643    | 1526.5    | 1   | 20/30 | 39    |

1 of 1 peptide matches reported, 0 removed due to filtering

DTA for scans: 19287468-1  
Precursor ion: 676.85  
Mass type: mono  
Mod's: (M\* +15.99492) C=161.01468

Ion series for charge: +1

| AA | A ions        | B ions         | B* ions | Bo ions | C ions | Y ions         | Y* ions | Yo ions | Z ions |
|----|---------------|----------------|---------|---------|--------|----------------|---------|---------|--------|
| N  | 87.06         | 115.05         |         |         |        |                |         |         |        |
| T  | 188.10        | <b>216.10</b>  |         |         |        | 1238.66        |         |         |        |
| L  | <b>301.19</b> | <b>329.18</b>  |         |         |        | <b>1137.61</b> |         |         |        |
| Y  | <b>464.25</b> | <b>492.25</b>  |         |         |        | <b>1024.52</b> |         |         |        |
| L  | <b>577.33</b> | <b>605.33</b>  |         |         |        | <b>861.46</b>  |         |         |        |
| Q  | 705.39        | <b>733.39</b>  |         |         |        | <b>748.38</b>  |         |         |        |
| M  | 836.43        | <b>864.43</b>  |         |         |        | <b>620.32</b>  |         |         |        |
| N  | 950.48        | <b>978.47</b>  |         |         |        | <b>489.28</b>  |         |         |        |
| S  | 1037.51       | <b>1065.50</b> |         |         |        | <b>375.24</b>  |         |         |        |
| L  | 1150.59       | <b>1178.59</b> |         |         |        | <b>288.20</b>  |         |         |        |
| R  |               |                |         |         |        | 175.12         |         |         |        |





#19287468-1 NL: 1.01E5



---

| Reference                          |                 |         |   | P      | Score | Coverage | Accession |     |       |       |
|------------------------------------|-----------------|---------|---|--------|-------|----------|-----------|-----|-------|-------|
| Scan(s)                            | Sequence        | MH+     | z | P      | XC    | DeltaCn  | Sp        | RSp | Ions  | Count |
| IPI:IPI00854707.1 TREMBL:A2J1M5;Q0 |                 |         |   | 3e-006 | 10.2  | 0.0      |           | 0   |       |       |
| 19287468 - 1                       | K.NTLYLQMNSLR.A | 1352.70 | 2 | 3e-006 | 4.027 | 0.643    | 1526.5    | 1   | 20/30 | 39    |

1 of 1 peptide matches reported, 0 removed due to filtering

DTA for scans: 19287468-1  
Precursor ion: 676.85  
Mass type: mono  
Mod's: (M\* +15.99492) C=161.01468

Ion series for charge: +1

| AA | A ions        | B ions         | B* ions | Bo ions | C ions | Y ions         | Y* ions | Yo ions | Z ions |
|----|---------------|----------------|---------|---------|--------|----------------|---------|---------|--------|
| N  | 87.06         | 115.05         |         |         |        |                |         |         |        |
| T  | 188.10        | <b>216.10</b>  |         |         |        | 1238.66        |         |         |        |
| L  | <b>301.19</b> | <b>329.18</b>  |         |         |        | <b>1137.61</b> |         |         |        |
| Y  | <b>464.25</b> | <b>492.25</b>  |         |         |        | <b>1024.52</b> |         |         |        |
| L  | <b>577.33</b> | <b>605.33</b>  |         |         |        | <b>861.46</b>  |         |         |        |
| Q  | 705.39        | <b>733.39</b>  |         |         |        | <b>748.38</b>  |         |         |        |
| M  | 836.43        | <b>864.43</b>  |         |         |        | <b>620.32</b>  |         |         |        |
| N  | 950.48        | <b>978.47</b>  |         |         |        | <b>489.28</b>  |         |         |        |
| S  | 1037.51       | <b>1065.50</b> |         |         |        | <b>375.24</b>  |         |         |        |
| L  | 1150.59       | <b>1178.59</b> |         |         |        | <b>288.20</b>  |         |         |        |
| R  |               |                |         |         |        | 175.12         |         |         |        |



#19287468-1 NL: 1.01E5



---

| Reference                          |                 |         |   | P      | Score | Coverage | Accession |     |       |       |
|------------------------------------|-----------------|---------|---|--------|-------|----------|-----------|-----|-------|-------|
| Scan(s)                            | Sequence        | MH+     | z | P      | XC    | DeltaCn  | Sp        | RSp | Ions  | Count |
| IPI:IPI00873155.2 TREMBL:A6NG04 EN |                 |         |   | 3e-006 | 10.2  | 0.0      |           | 0   |       |       |
| 19287468 - 1                       | K.NTLYLQMNSLR.A | 1352.70 | 2 | 3e-006 | 4.027 | 0.643    | 1526.5    | 1   | 20/30 | 39    |

1 of 1 peptide matches reported, 0 removed due to filtering

DTA for scans: 19287468-1  
Precursor ion: 676.85  
Mass type: mono  
Mod's: (M\* +15.99492) C=161.01468

Ion series for charge: +1

| AA | A ions        | B ions         | B* ions | Bo ions | C ions | Y ions         | Y* ions | Yo ions | Z ions |
|----|---------------|----------------|---------|---------|--------|----------------|---------|---------|--------|
| N  | 87.06         | 115.05         |         |         |        |                |         |         |        |
| T  | 188.10        | <b>216.10</b>  |         |         |        | 1238.66        |         |         |        |
| L  | <b>301.19</b> | <b>329.18</b>  |         |         |        | <b>1137.61</b> |         |         |        |
| Y  | <b>464.25</b> | <b>492.25</b>  |         |         |        | <b>1024.52</b> |         |         |        |
| L  | <b>577.33</b> | <b>605.33</b>  |         |         |        | <b>861.46</b>  |         |         |        |
| Q  | 705.39        | <b>733.39</b>  |         |         |        | <b>748.38</b>  |         |         |        |
| M  | 836.43        | <b>864.43</b>  |         |         |        | <b>620.32</b>  |         |         |        |
| N  | 950.48        | <b>978.47</b>  |         |         |        | <b>489.28</b>  |         |         |        |
| S  | 1037.51       | <b>1065.50</b> |         |         |        | <b>375.24</b>  |         |         |        |
| L  | 1150.59       | <b>1178.59</b> |         |         |        | <b>288.20</b>  |         |         |        |
| R  |               |                |         |         |        | 175.12         |         |         |        |



#19287468-1 NL: 1.01E5



---

| Reference                          |                 |         |   | P      | Score | Coverage | Accession |     |       |       |
|------------------------------------|-----------------|---------|---|--------|-------|----------|-----------|-----|-------|-------|
| Scan(s)                            | Sequence        | MH+     | z | P      | XC    | DeltaCn  | Sp        | RSp | Ions  | Count |
| IPI:IPI00888191.1 REFSEQ:XP_001714 |                 |         |   | 3e-006 | 10.2  | 0.0      | 0         |     |       |       |
| 19287468 - 1                       | K.NTLYLQMNSLR.A | 1352.70 | 2 | 3e-006 | 4.027 | 0.643    | 1526.5    | 1   | 20/30 | 39    |

---

1 of 1 peptide matches reported, 0 removed due to filtering



DTA for scans: 19287468-1  
Precursor ion: 676.85  
Mass type: mono  
Mod's: (M\* +15.99492) C=161.01468

Ion series for charge: +1

| AA | A ions        | B ions         | B* ions | Bo ions | C ions | Y ions         | Y* ions | Yo ions | Z ions |
|----|---------------|----------------|---------|---------|--------|----------------|---------|---------|--------|
| N  | 87.06         | 115.05         |         |         |        |                |         |         |        |
| T  | 188.10        | <b>216.10</b>  |         |         |        | 1238.66        |         |         |        |
| L  | <b>301.19</b> | <b>329.18</b>  |         |         |        | <b>1137.61</b> |         |         |        |
| Y  | <b>464.25</b> | <b>492.25</b>  |         |         |        | <b>1024.52</b> |         |         |        |
| L  | <b>577.33</b> | <b>605.33</b>  |         |         |        | <b>861.46</b>  |         |         |        |
| Q  | 705.39        | <b>733.39</b>  |         |         |        | <b>748.38</b>  |         |         |        |
| M  | 836.43        | <b>864.43</b>  |         |         |        | <b>620.32</b>  |         |         |        |
| N  | 950.48        | <b>978.47</b>  |         |         |        | <b>489.28</b>  |         |         |        |
| S  | 1037.51       | <b>1065.50</b> |         |         |        | <b>375.24</b>  |         |         |        |
| L  | 1150.59       | <b>1178.59</b> |         |         |        | <b>288.20</b>  |         |         |        |
| R  |               |                |         |         |        | 175.12         |         |         |        |



#19287468-1 NL: 1.01E5



---

| Reference                          |                 |         |   | P      | Score | Coverage | Accession |     |       |       |
|------------------------------------|-----------------|---------|---|--------|-------|----------|-----------|-----|-------|-------|
| Scan(s)                            | Sequence        | MH+     | z | P      | XC    | DeltaCn  | Sp        | RSp | Ions  | Count |
| IPI:IPI00888954.1 REFSEQ:XP_001717 |                 |         |   | 3e-006 | 10.2  | 0.0      | 0         |     |       |       |
| 19287468 - 1                       | K.NTLYLQMNSLR.A | 1352.70 | 2 | 3e-006 | 4.027 | 0.643    | 1526.5    | 1   | 20/30 | 39    |

1 of 1 peptide matches reported, 0 removed due to filtering

DTA for scans: 19287468-1  
Precursor ion: 676.85  
Mass type: mono  
Mod's: (M\* +15.99492) C=161.01468

Ion series for charge: +1

| AA | A ions        | B ions         | B* ions | Bo ions | C ions | Y ions         | Y* ions | Yo ions | Z ions |
|----|---------------|----------------|---------|---------|--------|----------------|---------|---------|--------|
| N  | 87.06         | 115.05         |         |         |        |                |         |         |        |
| T  | 188.10        | <b>216.10</b>  |         |         |        | 1238.66        |         |         |        |
| L  | <b>301.19</b> | <b>329.18</b>  |         |         |        | <b>1137.61</b> |         |         |        |
| Y  | <b>464.25</b> | <b>492.25</b>  |         |         |        | <b>1024.52</b> |         |         |        |
| L  | <b>577.33</b> | <b>605.33</b>  |         |         |        | <b>861.46</b>  |         |         |        |
| Q  | 705.39        | <b>733.39</b>  |         |         |        | <b>748.38</b>  |         |         |        |
| M  | 836.43        | <b>864.43</b>  |         |         |        | <b>620.32</b>  |         |         |        |
| N  | 950.48        | <b>978.47</b>  |         |         |        | <b>489.28</b>  |         |         |        |
| S  | 1037.51       | <b>1065.50</b> |         |         |        | <b>375.24</b>  |         |         |        |
| L  | 1150.59       | <b>1178.59</b> |         |         |        | <b>288.20</b>  |         |         |        |
| R  |               |                |         |         |        | 175.12         |         |         |        |



#19287468-1 NL: 1.01E5



---

| Reference                                                      |                            |         |   | P      | Score | Coverage | Accession |     |        |       |  |
|----------------------------------------------------------------|----------------------------|---------|---|--------|-------|----------|-----------|-----|--------|-------|--|
| Scan(s)                                                        | Sequence                   | MH+     | z | P      | XC    | DeltaCn  | Sp        | RSp | Ions   | Count |  |
| IPI:IPI00022432.1 SWISS-PROT:P02766 TREMBL:A6XMH1;Q53WY6;Q549C |                            |         |   | 3e-006 | 10.3  | 0.0      | 0         |     |        |       |  |
| 19287468 - 1                                                   | K.TSESGELHGLTTEEEFVEGIYK.V | 2455.15 | 3 | 3e-006 | 5.015 | 0.570    | 946.8     | 1   | 30/126 | 2     |  |

1 of 1 peptide matches reported, 0 removed due to filtering

DTA for scans: 19287468-1  
Precursor ion: 819.06  
Mass type: mono  
Mod's: (M\* +15.99492) C=161.01468

Ion series for charge: +1

| AA | A ions  | B ions         | B* ions | Bo ions | C ions | Y ions         | Y* ions | Yo ions | Z ions |
|----|---------|----------------|---------|---------|--------|----------------|---------|---------|--------|
| T  | 74.06   | 102.05         |         |         |        |                |         |         |        |
| S  | 161.09  | 189.09         |         |         |        | 2354.10        |         |         |        |
| E  | 290.13  | 318.13         |         |         |        | 2267.07        |         |         |        |
| S  | 377.17  | 405.16         |         |         |        | 2138.03        |         |         |        |
| G  | 434.19  | 462.18         |         |         |        | 2051.00        |         |         |        |
| E  | 563.23  | <b>591.23</b>  |         |         |        | 1993.98        |         |         |        |
| L  | 676.31  | 704.31         |         |         |        | 1864.93        |         |         |        |
| H  | 813.37  | 841.37         |         |         |        | 1751.85        |         |         |        |
| G  | 870.40  | 898.39         |         |         |        | 1614.79        |         |         |        |
| L  | 983.48  | <b>1011.47</b> |         |         |        | 1557.77        |         |         |        |
| T  | 1084.53 | <b>1112.52</b> |         |         |        | <b>1444.68</b> |         |         |        |
| T  | 1185.57 | 1213.57        |         |         |        | <b>1343.64</b> |         |         |        |
| E  | 1314.62 | <b>1342.61</b> |         |         |        | <b>1242.59</b> |         |         |        |
| E  | 1443.66 | 1471.65        |         |         |        | <b>1113.55</b> |         |         |        |
| E  | 1572.70 | 1600.70        |         |         |        | <b>984.50</b>  |         |         |        |
| F  | 1719.77 | 1747.77        |         |         |        | <b>855.46</b>  |         |         |        |
| V  | 1818.84 | 1846.83        |         |         |        | <b>708.39</b>  |         |         |        |
| E  | 1947.88 | 1975.88        |         |         |        | <b>609.32</b>  |         |         |        |
| G  | 2004.90 | 2032.90        |         |         |        | <b>480.28</b>  |         |         |        |
| I  | 2117.99 | 2145.98        |         |         |        | <b>423.26</b>  |         |         |        |
| Y  | 2281.05 | 2309.05        |         |         |        | <b>310.18</b>  |         |         |        |
| K  |         |                |         |         |        | 147.11         |         |         |        |

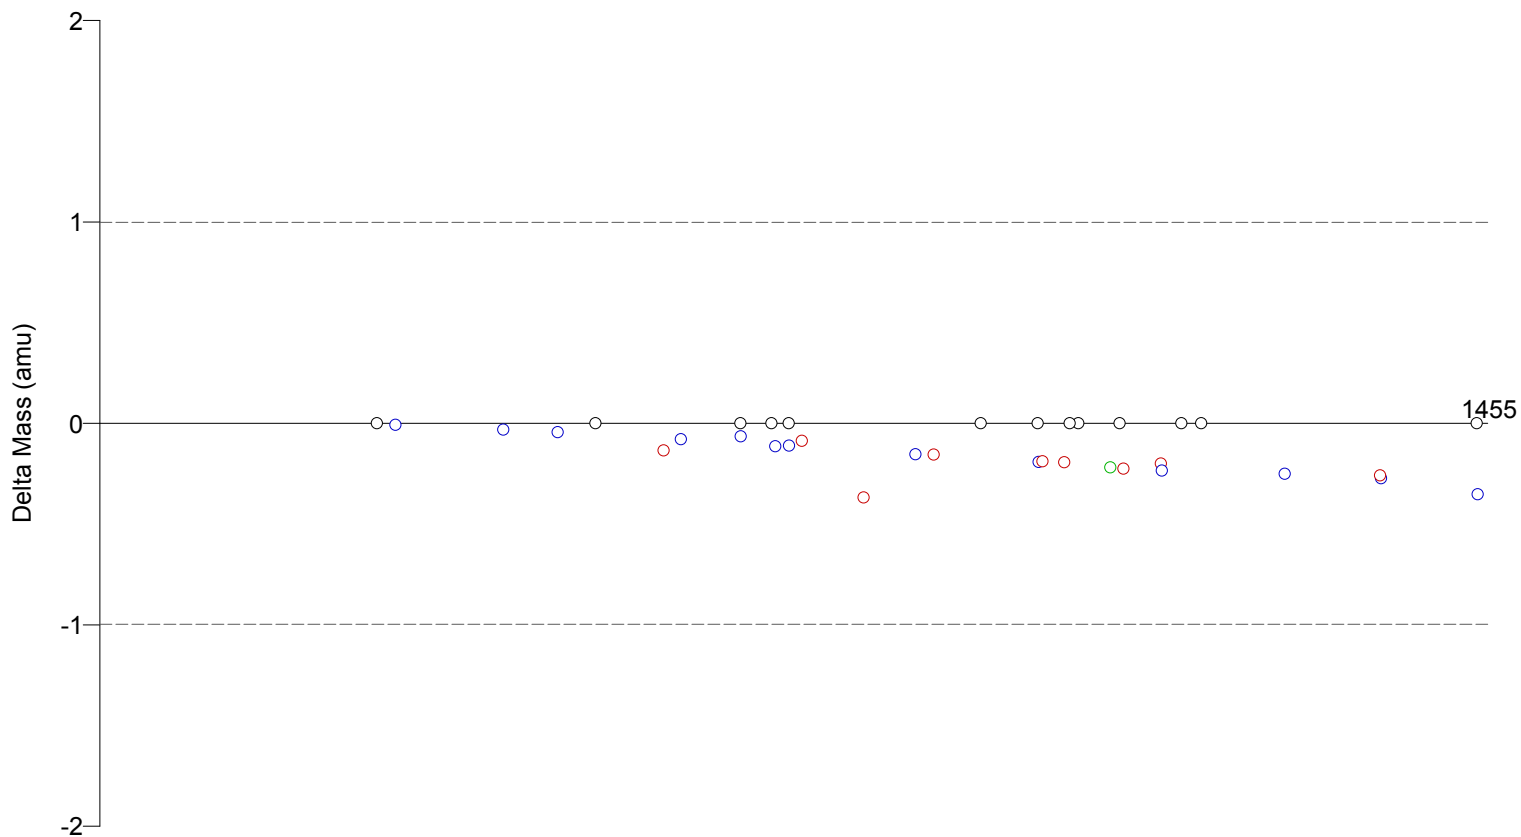

#19287468-1 NL: 6.24E5

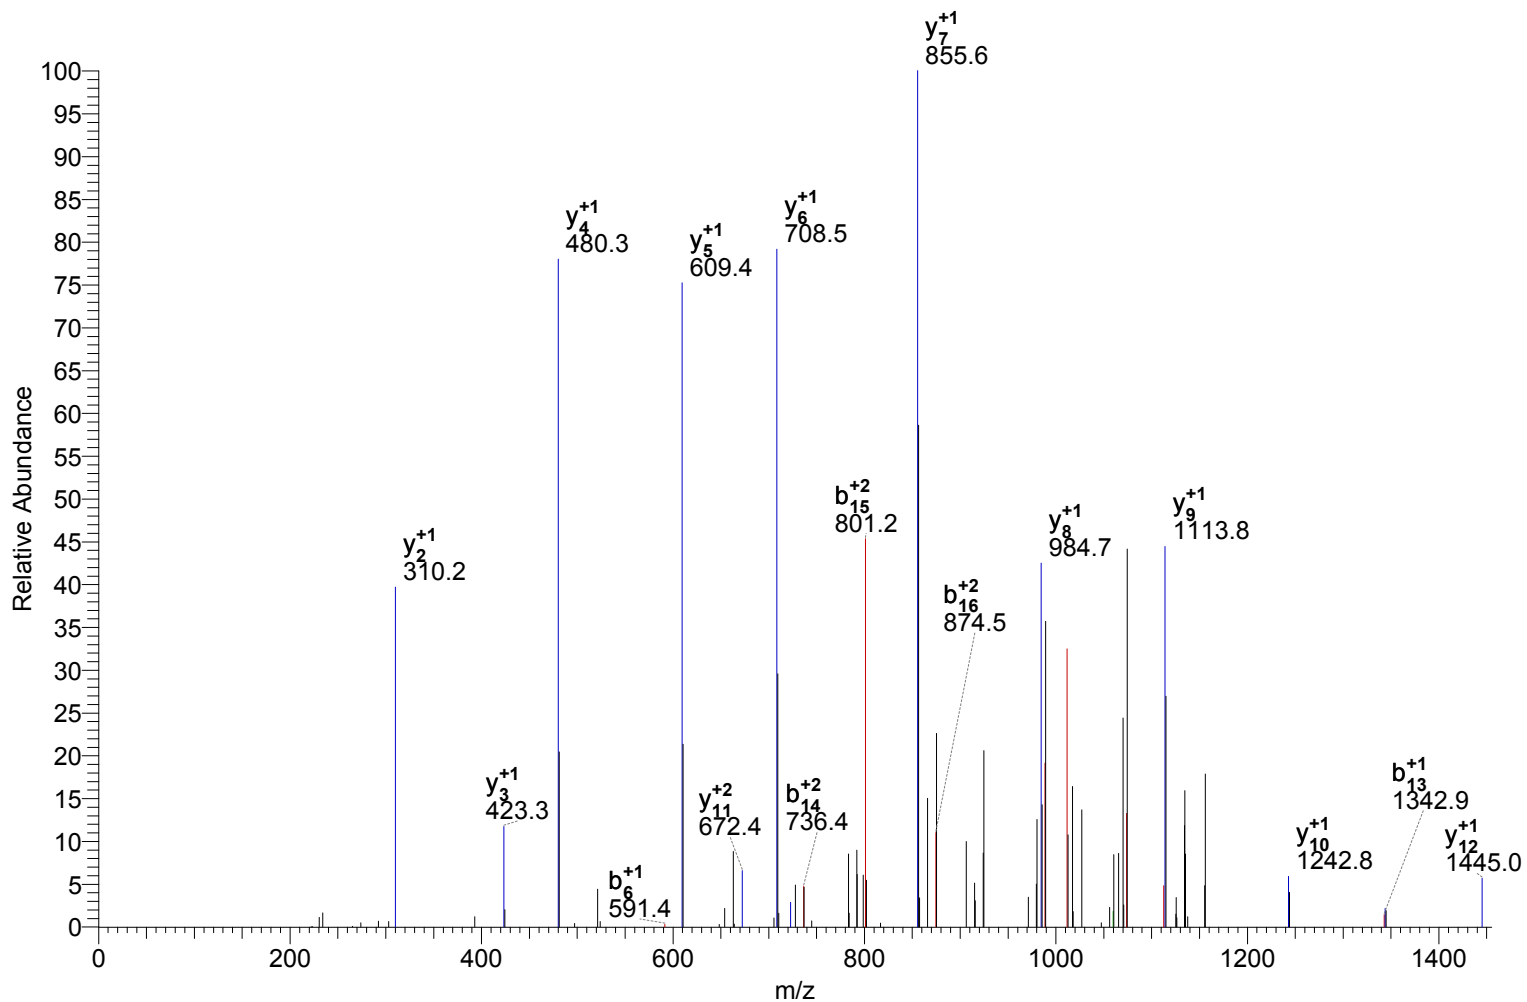



---

| Reference                          |                            |         |   | P      | Score | Coverage | Accession |     |        |       |
|------------------------------------|----------------------------|---------|---|--------|-------|----------|-----------|-----|--------|-------|
| Scan(s)                            | Sequence                   | MH+     | z | P      | XC    | DeltaCn  | Sp        | RSp | Ions   | Count |
| IPI:IPI00646384.1 VEGA:OTTHUMP0000 |                            |         |   | 3e-006 | 10.3  | 0.0      | 0         |     |        |       |
| 19287468 - 1                       | K.TSESGELHGLTTEEEFVEGIYK.V | 2455.15 | 3 | 3e-006 | 5.015 | 0.570    | 946.8     | 1   | 30/126 | 2     |

1 of 1 peptide matches reported, 0 removed due to filtering

DTA for scans: 19287468-1  
Precursor ion: 819.06  
Mass type: mono  
Mod's: (M\* +15.99492) C=161.01468

Ion series for charge: +1

| AA | A ions  | B ions         | B* ions | Bo ions | C ions | Y ions         | Y* ions | Yo ions | Z ions |
|----|---------|----------------|---------|---------|--------|----------------|---------|---------|--------|
| T  | 74.06   | 102.05         |         |         |        |                |         |         |        |
| S  | 161.09  | 189.09         |         |         |        | 2354.10        |         |         |        |
| E  | 290.13  | 318.13         |         |         |        | 2267.07        |         |         |        |
| S  | 377.17  | 405.16         |         |         |        | 2138.03        |         |         |        |
| G  | 434.19  | 462.18         |         |         |        | 2051.00        |         |         |        |
| E  | 563.23  | <b>591.23</b>  |         |         |        | 1993.98        |         |         |        |
| L  | 676.31  | 704.31         |         |         |        | 1864.93        |         |         |        |
| H  | 813.37  | 841.37         |         |         |        | 1751.85        |         |         |        |
| G  | 870.40  | 898.39         |         |         |        | 1614.79        |         |         |        |
| L  | 983.48  | <b>1011.47</b> |         |         |        | 1557.77        |         |         |        |
| T  | 1084.53 | <b>1112.52</b> |         |         |        | <b>1444.68</b> |         |         |        |
| T  | 1185.57 | 1213.57        |         |         |        | <b>1343.64</b> |         |         |        |
| E  | 1314.62 | <b>1342.61</b> |         |         |        | <b>1242.59</b> |         |         |        |
| E  | 1443.66 | 1471.65        |         |         |        | <b>1113.55</b> |         |         |        |
| E  | 1572.70 | 1600.70        |         |         |        | <b>984.50</b>  |         |         |        |
| F  | 1719.77 | 1747.77        |         |         |        | <b>855.46</b>  |         |         |        |
| V  | 1818.84 | 1846.83        |         |         |        | <b>708.39</b>  |         |         |        |
| E  | 1947.88 | 1975.88        |         |         |        | <b>609.32</b>  |         |         |        |
| G  | 2004.90 | 2032.90        |         |         |        | <b>480.28</b>  |         |         |        |
| I  | 2117.99 | 2145.98        |         |         |        | <b>423.26</b>  |         |         |        |
| Y  | 2281.05 | 2309.05        |         |         |        | <b>310.18</b>  |         |         |        |
| K  |         |                |         |         |        | 147.11         |         |         |        |

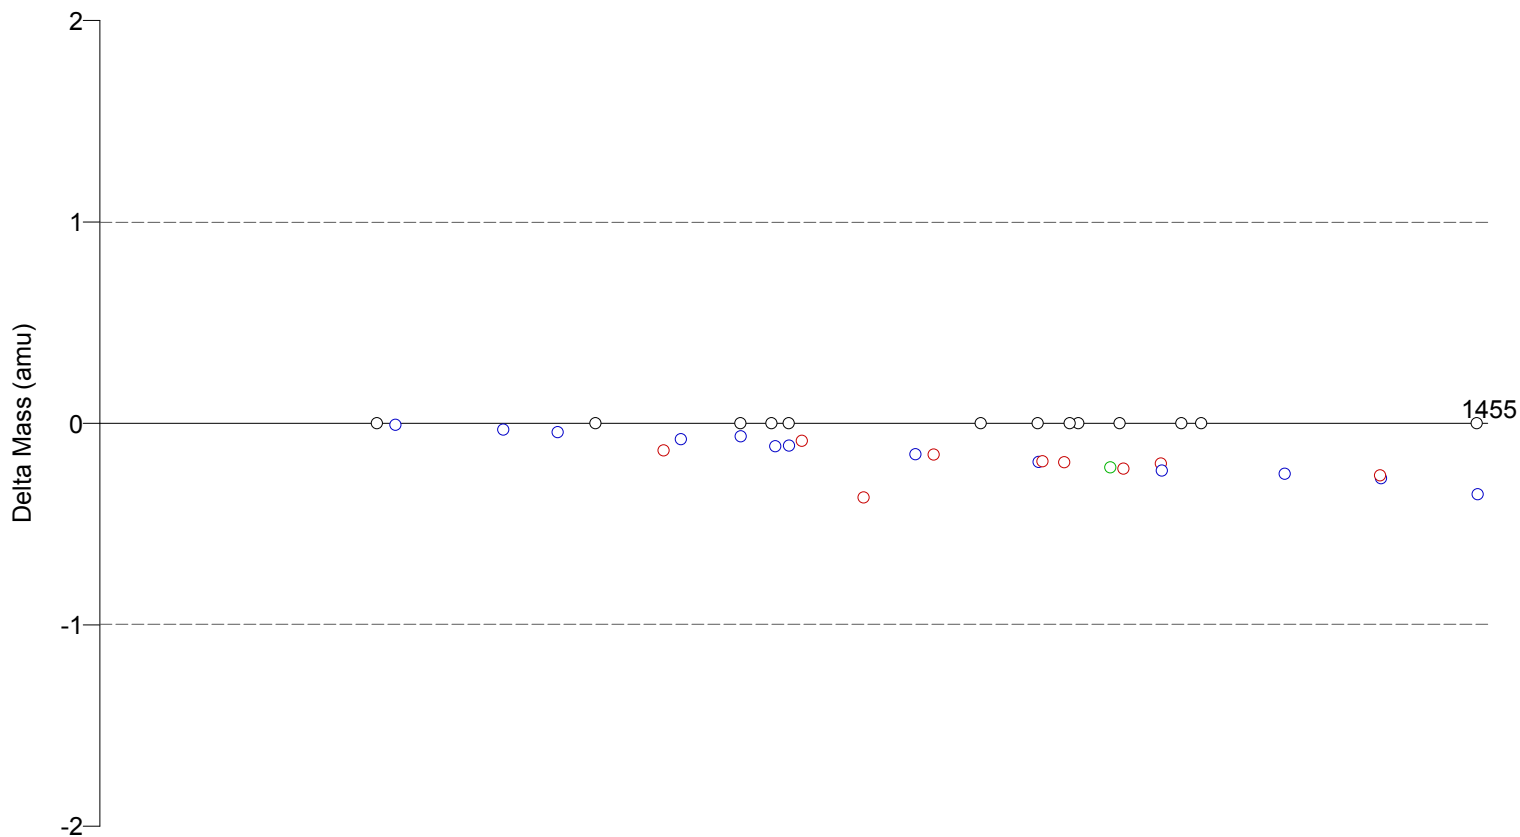

#19287468-1 NL: 6.24E5



---

| Reference                          |                            |         |   | P      | Score | Coverage | Accession |     |        |       |
|------------------------------------|----------------------------|---------|---|--------|-------|----------|-----------|-----|--------|-------|
| Scan(s)                            | Sequence                   | MH+     | z | P      | XC    | DeltaCn  | Sp        | RSp | Ions   | Count |
| IPI:IPI00855916.1 TREMBL:A6XGL1 Ta |                            |         |   | 3e-006 | 10.3  | 0.0      | 0         |     |        |       |
| 19287468 - 1                       | K.TSESGELHGLTTEEEFVEGIYK.V | 2455.15 | 3 | 3e-006 | 5.015 | 0.570    | 946.8     | 1   | 30/126 | 2     |

1 of 1 peptide matches reported, 0 removed due to filtering

DTA for scans: 19287468-1  
Precursor ion: 819.06  
Mass type: mono  
Mod's: (M\* +15.99492) C=161.01468

Ion series for charge: +1

| AA | A ions  | B ions         | B* ions | Bo ions | C ions | Y ions         | Y* ions | Yo ions | Z ions |
|----|---------|----------------|---------|---------|--------|----------------|---------|---------|--------|
| T  | 74.06   | 102.05         |         |         |        |                |         |         |        |
| S  | 161.09  | 189.09         |         |         |        | 2354.10        |         |         |        |
| E  | 290.13  | 318.13         |         |         |        | 2267.07        |         |         |        |
| S  | 377.17  | 405.16         |         |         |        | 2138.03        |         |         |        |
| G  | 434.19  | 462.18         |         |         |        | 2051.00        |         |         |        |
| E  | 563.23  | <b>591.23</b>  |         |         |        | 1993.98        |         |         |        |
| L  | 676.31  | 704.31         |         |         |        | 1864.93        |         |         |        |
| H  | 813.37  | 841.37         |         |         |        | 1751.85        |         |         |        |
| G  | 870.40  | 898.39         |         |         |        | 1614.79        |         |         |        |
| L  | 983.48  | <b>1011.47</b> |         |         |        | 1557.77        |         |         |        |
| T  | 1084.53 | <b>1112.52</b> |         |         |        | <b>1444.68</b> |         |         |        |
| T  | 1185.57 | 1213.57        |         |         |        | <b>1343.64</b> |         |         |        |
| E  | 1314.62 | <b>1342.61</b> |         |         |        | <b>1242.59</b> |         |         |        |
| E  | 1443.66 | 1471.65        |         |         |        | <b>1113.55</b> |         |         |        |
| E  | 1572.70 | 1600.70        |         |         |        | <b>984.50</b>  |         |         |        |
| F  | 1719.77 | 1747.77        |         |         |        | <b>855.46</b>  |         |         |        |
| V  | 1818.84 | 1846.83        |         |         |        | <b>708.39</b>  |         |         |        |
| E  | 1947.88 | 1975.88        |         |         |        | <b>609.32</b>  |         |         |        |
| G  | 2004.90 | 2032.90        |         |         |        | <b>480.28</b>  |         |         |        |
| I  | 2117.99 | 2145.98        |         |         |        | <b>423.26</b>  |         |         |        |
| Y  | 2281.05 | 2309.05        |         |         |        | <b>310.18</b>  |         |         |        |
| K  |         |                |         |         |        | 147.11         |         |         |        |



#19287468-1 NL: 6.24E5



---

| Reference                          |          |         |   | P      | Score | Coverage | Accession |     |       |       |
|------------------------------------|----------|---------|---|--------|-------|----------|-----------|-----|-------|-------|
| Scan(s)                            | Sequence | MH+     | z | P      | XC    | DeltaCn  | Sp        | RSp | Ions  | Count |
| IPI:IPI00423463.1 TREMBL:Q6N094 Ta |          |         |   | 6e-006 | 20.2  | 0.0      | 0         |     |       |       |
| 2118291816 - K.GPSVFPLAPSSK.S      |          | 1186.65 | 2 | 0.02   | 2.948 | 0.348    | 465.0     | 1   | 15/33 | 14    |
| 2118291816 - R.LSCAASGFTFR.S       |          | 1217.56 | 2 | 6e-006 | 3.492 | 0.654    | 1231.4    | 1   | 20/30 | 3     |

2 of 2 peptide matches reported, 0 removed due to filtering

DTA for scans: 2118291816-26226248  
Precursor ion: 593.83  
Mass type: mono  
Mod's: (M\* +15.99492) C=161.01468

Ion series for charge: +1

| AA | A ions        | B ions         | B* ions | Bo ions | C ions | Y ions         | Y* ions | Yo ions | Z ions |
|----|---------------|----------------|---------|---------|--------|----------------|---------|---------|--------|
| G  | 30.03         | 58.03          |         |         |        |                |         |         |        |
| P  | 127.09        | 155.08         |         |         |        | 1129.63        |         |         |        |
| S  | 214.12        | <b>242.11</b>  |         |         |        | <b>1032.57</b> |         |         |        |
| V  | <b>313.19</b> | <b>341.18</b>  |         |         |        | <b>945.54</b>  |         |         |        |
| F  | <b>460.26</b> | <b>488.25</b>  |         |         |        | <b>846.47</b>  |         |         |        |
| P  | 557.31        | 585.30         |         |         |        | <b>699.40</b>  |         |         |        |
| L  | 670.39        | <b>698.39</b>  |         |         |        | <b>602.35</b>  |         |         |        |
| A  | 741.43        | <b>769.42</b>  |         |         |        | <b>489.27</b>  |         |         |        |
| P  | 838.48        | 866.48         |         |         |        | <b>418.23</b>  |         |         |        |
| S  | 925.51        | 953.51         |         |         |        | 321.18         |         |         |        |
| S  | 1012.55       | <b>1040.54</b> |         |         |        | 234.14         |         |         |        |
| K  |               |                |         |         |        | 147.11         |         |         |        |



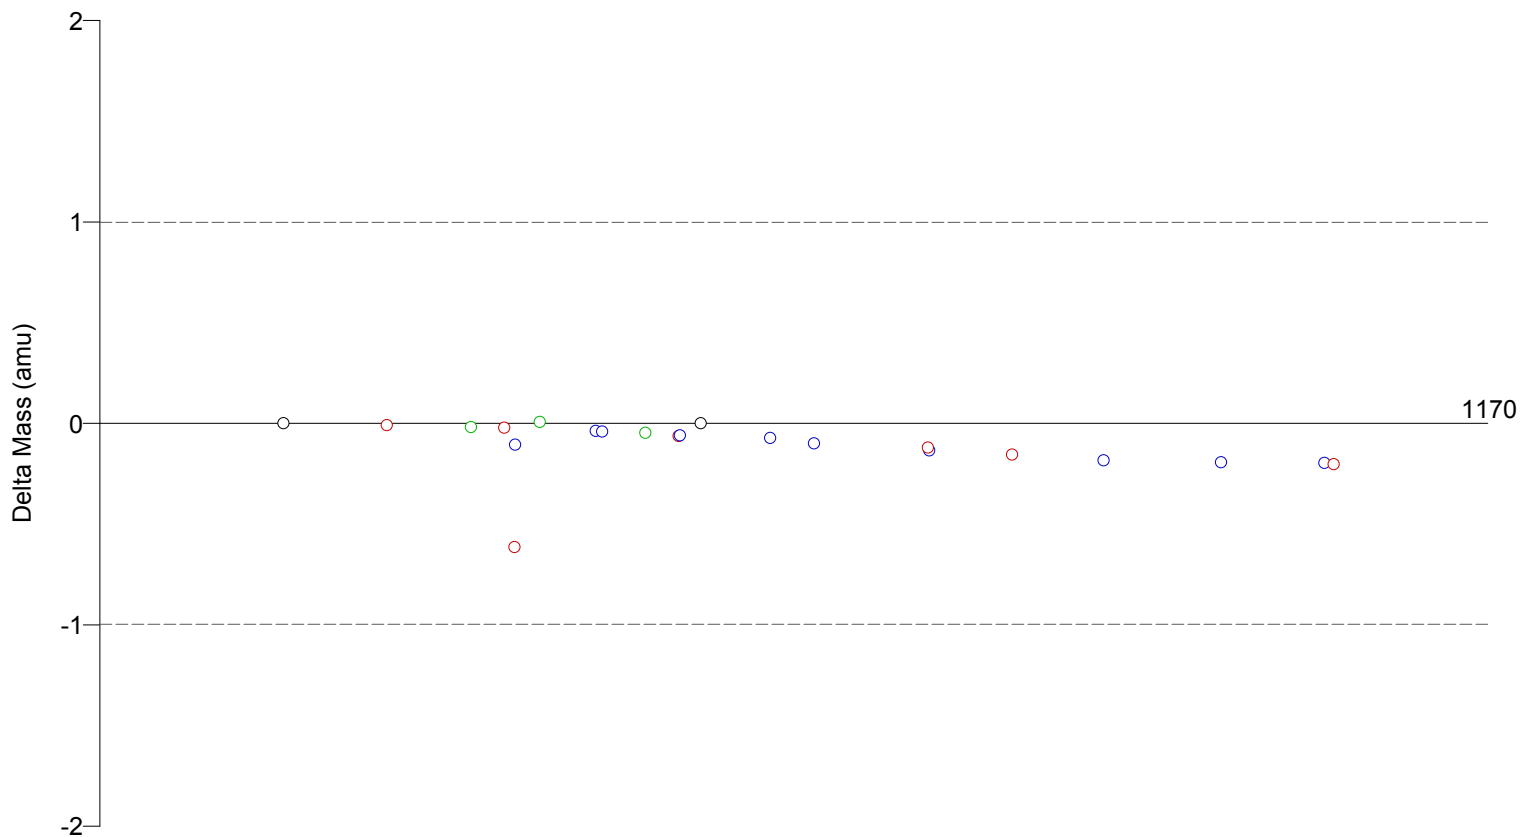

#2118291816-26226248 NL: 6.95E6

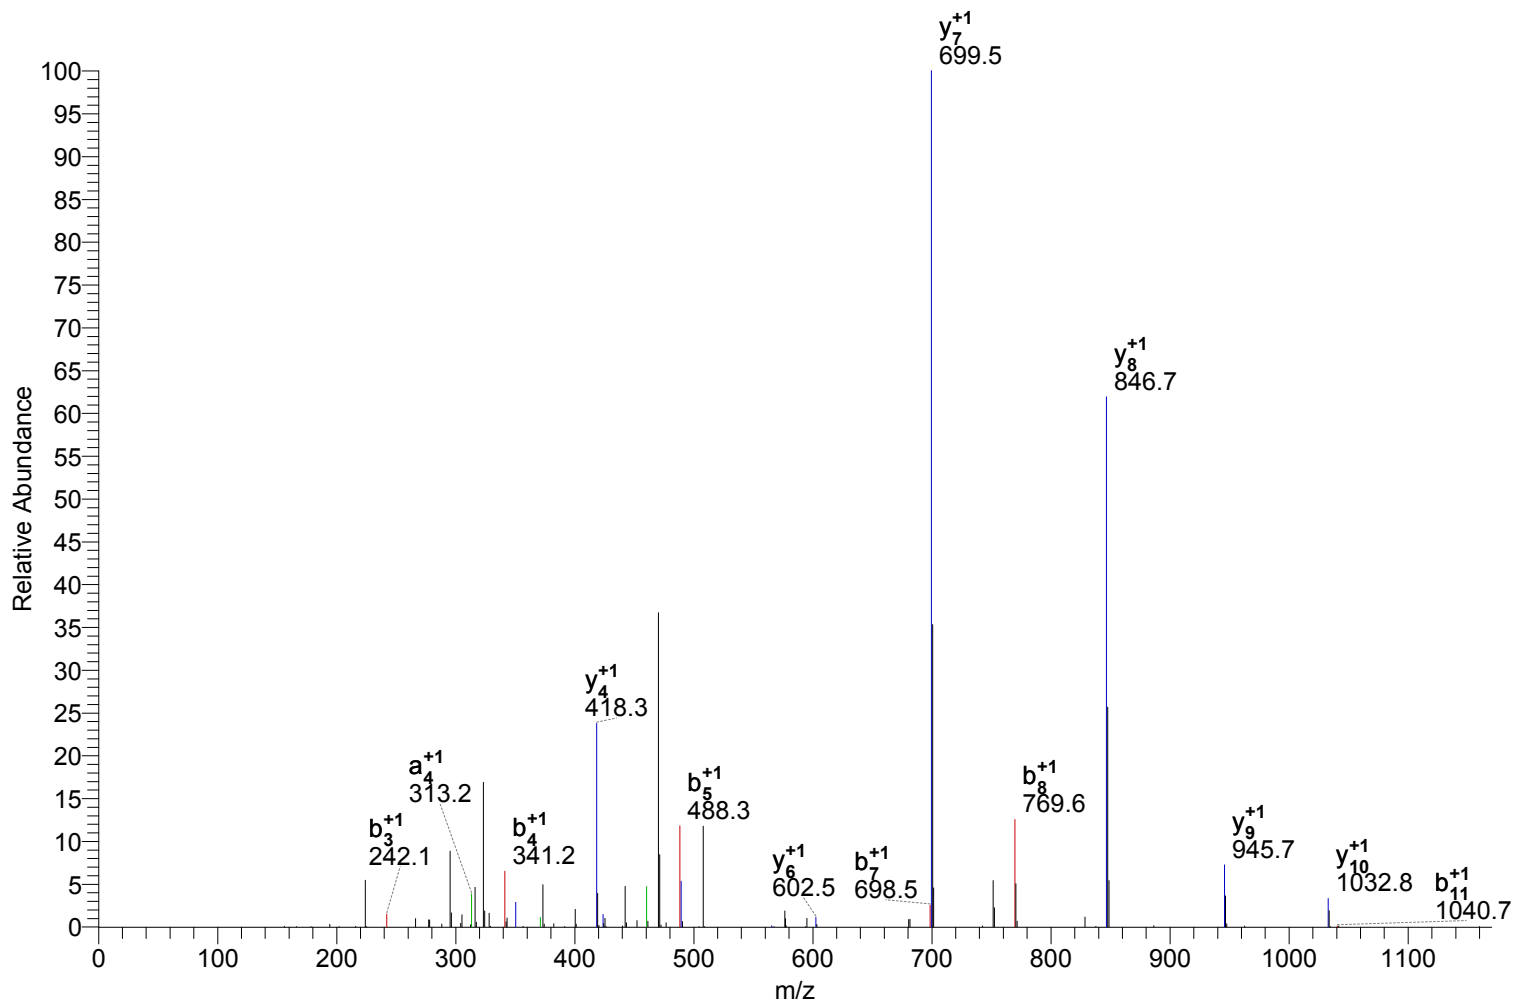

DTA for scans: 2118291816-26226248  
Precursor ion: 609.29  
Mass type: mono  
Mod's: (M\* +15.99492) C=161.01468

Ion series for charge: +1

| AA | A ions         | B ions        | B* ions | Bo ions | C ions | Y ions         | Y* ions | Yo ions | Z ions |
|----|----------------|---------------|---------|---------|--------|----------------|---------|---------|--------|
| L  | 86.10          | 114.09        |         |         |        |                |         |         |        |
| S  | 173.13         | <b>201.12</b> |         |         |        | <b>1104.48</b> |         |         |        |
| C  | 334.14         | <b>362.14</b> |         |         |        | <b>1017.45</b> |         |         |        |
| A  | 405.18         | <b>433.18</b> |         |         |        | <b>856.43</b>  |         |         |        |
| A  | <b>476.22</b>  | <b>504.21</b> |         |         |        | <b>785.39</b>  |         |         |        |
| S  | 563.25         | <b>591.24</b> |         |         |        | <b>714.36</b>  |         |         |        |
| G  | 620.27         | <b>648.27</b> |         |         |        | <b>627.32</b>  |         |         |        |
| F  | <b>767.34</b>  | <b>795.33</b> |         |         |        | <b>570.30</b>  |         |         |        |
| T  | 868.39         | <b>896.38</b> |         |         |        | <b>423.24</b>  |         |         |        |
| F  | <b>1015.46</b> | 1043.45       |         |         |        | <b>322.19</b>  |         |         |        |
| R  |                |               |         |         |        | 175.12         |         |         |        |



#2118291816-26226248 NL: 9.29E4

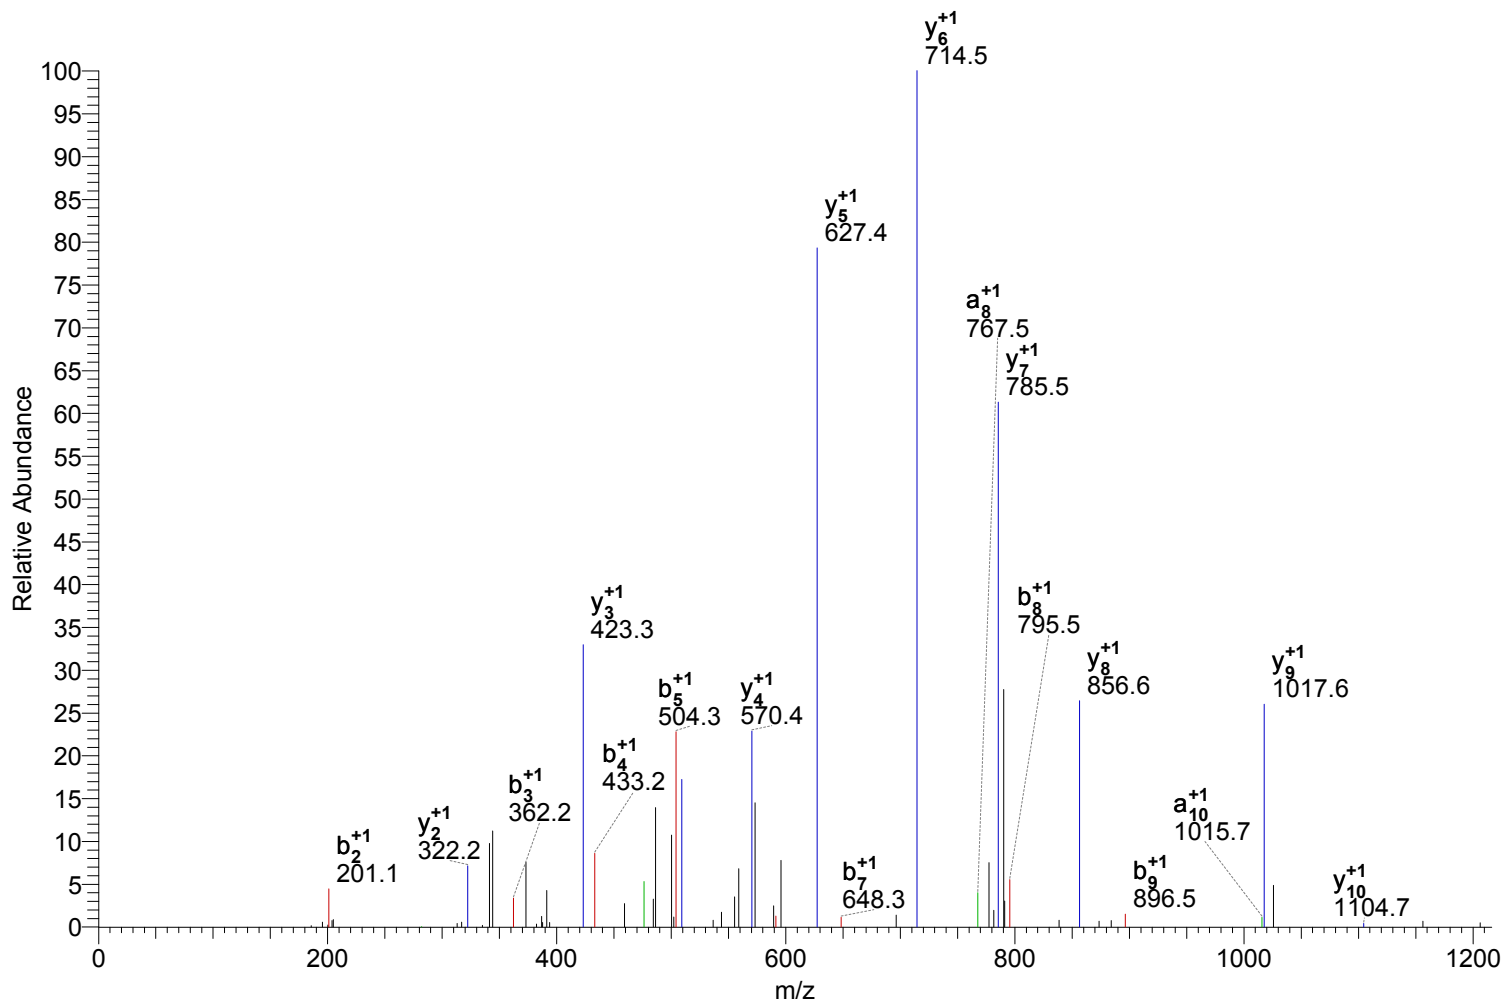

---

| Reference                          |          |         |   | P      | Score | Coverage | Accession |     |       |       |
|------------------------------------|----------|---------|---|--------|-------|----------|-----------|-----|-------|-------|
| Scan(s)                            | Sequence | MH+     | z | P      | XC    | DeltaCn  | Sp        | RSp | Ions  | Count |
| IPI:IPI00784842.1 TREMBL:Q6MZQ6 Ta |          |         |   | 6e-006 | 20.2  | 0.0      |           | 0   |       |       |
| 2118291816 - K.GPSVFPLAPSSK.S      |          | 1186.65 | 2 | 0.02   | 2.948 | 0.348    | 465.0     | 1   | 15/33 | 14    |
| 2118291816 - R.LSCAASGFTFR.S       |          | 1217.56 | 2 | 6e-006 | 3.492 | 0.654    | 1231.4    | 1   | 20/30 | 3     |

2 of 2 peptide matches reported, 0 removed due to filtering

DTA for scans: 2118291816-26226248  
Precursor ion: 593.83  
Mass type: mono  
Mod's: (M\* +15.99492) C=161.01468

Ion series for charge: +1

| AA | A ions        | B ions         | B* ions | Bo ions | C ions | Y ions         | Y* ions | Yo ions | Z ions |
|----|---------------|----------------|---------|---------|--------|----------------|---------|---------|--------|
| G  | 30.03         | 58.03          |         |         |        |                |         |         |        |
| P  | 127.09        | 155.08         |         |         |        | 1129.63        |         |         |        |
| S  | 214.12        | <b>242.11</b>  |         |         |        | <b>1032.57</b> |         |         |        |
| V  | <b>313.19</b> | <b>341.18</b>  |         |         |        | <b>945.54</b>  |         |         |        |
| F  | <b>460.26</b> | <b>488.25</b>  |         |         |        | <b>846.47</b>  |         |         |        |
| P  | 557.31        | 585.30         |         |         |        | <b>699.40</b>  |         |         |        |
| L  | 670.39        | <b>698.39</b>  |         |         |        | <b>602.35</b>  |         |         |        |
| A  | 741.43        | <b>769.42</b>  |         |         |        | <b>489.27</b>  |         |         |        |
| P  | 838.48        | 866.48         |         |         |        | <b>418.23</b>  |         |         |        |
| S  | 925.51        | 953.51         |         |         |        | 321.18         |         |         |        |
| S  | 1012.55       | <b>1040.54</b> |         |         |        | 234.14         |         |         |        |
| K  |               |                |         |         |        | 147.11         |         |         |        |



#2118291816-26226248 NL: 6.95E6

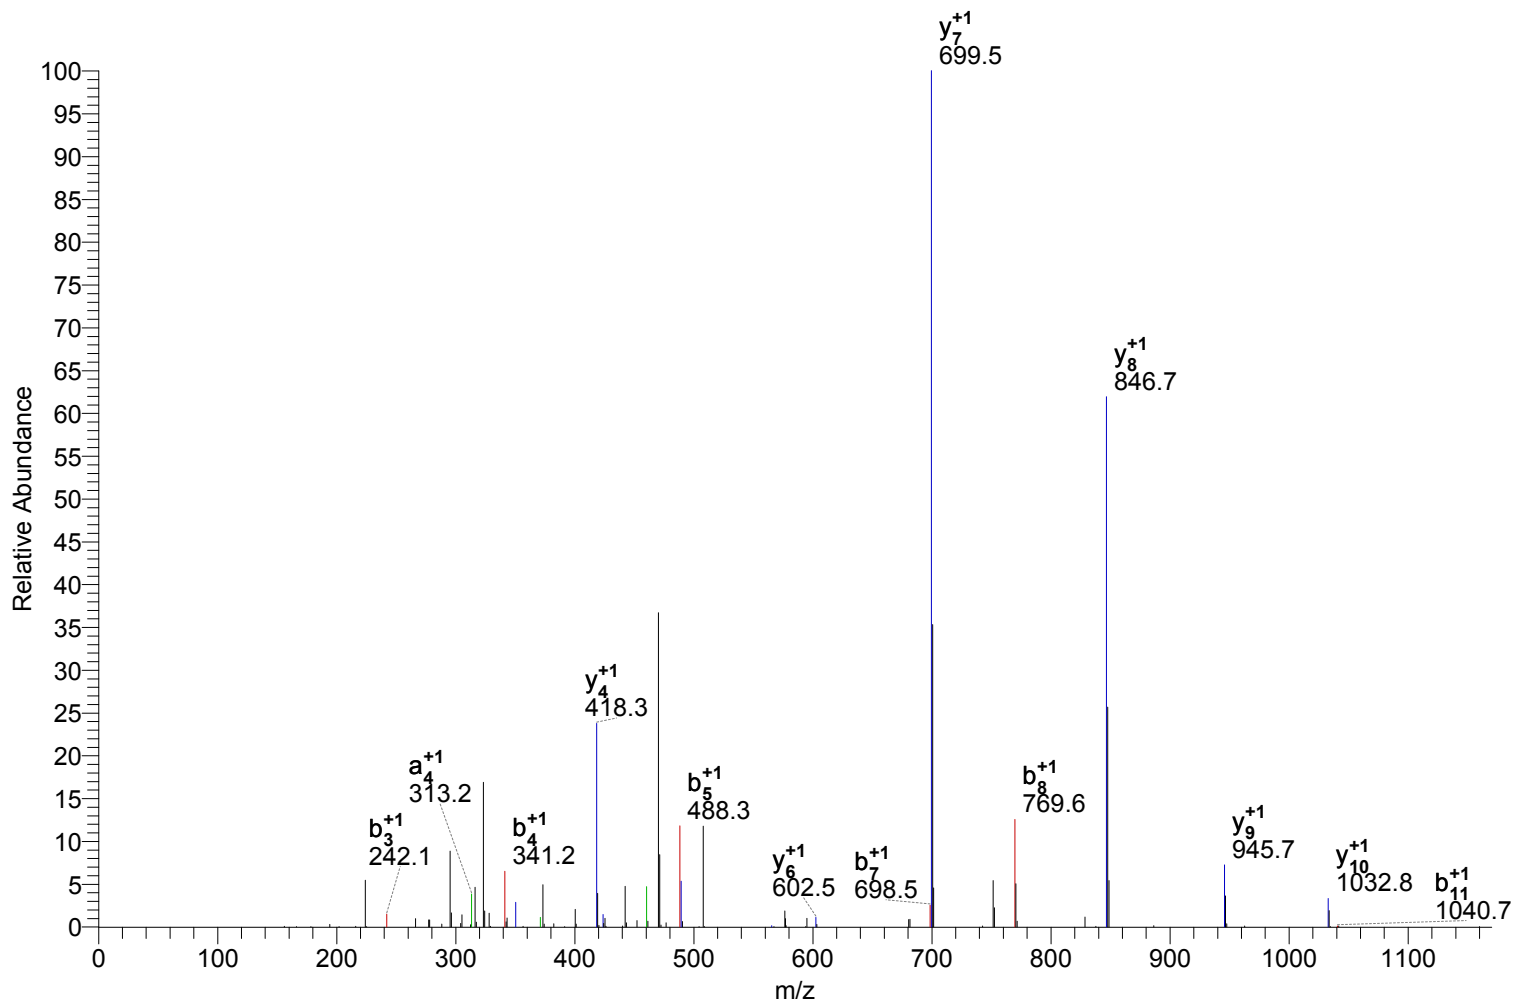

DTA for scans: 2118291816-26226248  
Precursor ion: 609.29  
Mass type: mono  
Mod's: (M\* +15.99492) C=161.01468

Ion series for charge: +1

| AA | A ions         | B ions        | B* ions | Bo ions | C ions | Y ions         | Y* ions | Yo ions | Z ions |
|----|----------------|---------------|---------|---------|--------|----------------|---------|---------|--------|
| L  | 86.10          | 114.09        |         |         |        |                |         |         |        |
| S  | 173.13         | <b>201.12</b> |         |         |        | <b>1104.48</b> |         |         |        |
| C  | 334.14         | <b>362.14</b> |         |         |        | <b>1017.45</b> |         |         |        |
| A  | 405.18         | <b>433.18</b> |         |         |        | <b>856.43</b>  |         |         |        |
| A  | <b>476.22</b>  | <b>504.21</b> |         |         |        | <b>785.39</b>  |         |         |        |
| S  | 563.25         | <b>591.24</b> |         |         |        | <b>714.36</b>  |         |         |        |
| G  | 620.27         | <b>648.27</b> |         |         |        | <b>627.32</b>  |         |         |        |
| F  | <b>767.34</b>  | <b>795.33</b> |         |         |        | <b>570.30</b>  |         |         |        |
| T  | 868.39         | <b>896.38</b> |         |         |        | <b>423.24</b>  |         |         |        |
| F  | <b>1015.46</b> | 1043.45       |         |         |        | <b>322.19</b>  |         |         |        |
| R  |                |               |         |         |        | 175.12         |         |         |        |



#2118291816-26226248 NL: 9.29E4





---

| Reference                          |          |         |   | P      | Score | Coverage | Accession |     |       |       |
|------------------------------------|----------|---------|---|--------|-------|----------|-----------|-----|-------|-------|
| Scan(s)                            | Sequence | MH+     | z | P      | XC    | DeltaCn  | Sp        | RSp | Ions  | Count |
| IPI:IPI00783023.1 TREMBL:Q0ZCI6 Ta |          |         |   | 6e-006 | 10.2  | 0.0      | 0         |     |       |       |
| 2118291816 - R.LSCAASGFTFR.S       |          | 1217.56 | 2 | 6e-006 | 3.492 | 0.654    | 1231.4    | 1   | 20/30 | 3     |

1 of 1 peptide matches reported, 0 removed due to filtering

DTA for scans: 2118291816-26226248  
Precursor ion: 609.29  
Mass type: mono  
Mod's: (M\* +15.99492) C=161.01468

Ion series for charge: +1

| AA | A ions         | B ions        | B* ions | Bo ions | C ions | Y ions         | Y* ions | Yo ions | Z ions |
|----|----------------|---------------|---------|---------|--------|----------------|---------|---------|--------|
| L  | 86.10          | 114.09        |         |         |        |                |         |         |        |
| S  | 173.13         | <b>201.12</b> |         |         |        | <b>1104.48</b> |         |         |        |
| C  | 334.14         | <b>362.14</b> |         |         |        | <b>1017.45</b> |         |         |        |
| A  | 405.18         | <b>433.18</b> |         |         |        | <b>856.43</b>  |         |         |        |
| A  | <b>476.22</b>  | <b>504.21</b> |         |         |        | <b>785.39</b>  |         |         |        |
| S  | 563.25         | <b>591.24</b> |         |         |        | <b>714.36</b>  |         |         |        |
| G  | 620.27         | <b>648.27</b> |         |         |        | <b>627.32</b>  |         |         |        |
| F  | <b>767.34</b>  | <b>795.33</b> |         |         |        | <b>570.30</b>  |         |         |        |
| T  | 868.39         | <b>896.38</b> |         |         |        | <b>423.24</b>  |         |         |        |
| F  | <b>1015.46</b> | 1043.45       |         |         |        | <b>322.19</b>  |         |         |        |
| R  |                |               |         |         |        | 175.12         |         |         |        |



#2118291816-26226248 NL: 9.29E4



---

| Reference                                                      |                |         |   | P      | Score | Coverage | Accession |     |       |       |
|----------------------------------------------------------------|----------------|---------|---|--------|-------|----------|-----------|-----|-------|-------|
| Scan(s)                                                        | Sequence       | MH+     | z | P      | XC    | DeltaCn  | Sp        | RSp | Ions  | Count |
| IPI:IPI00022391.1 SWISS-PROT:P02743 ENSEMBL:ENSP00000255040 RE |                |         |   | 6e-006 | 10.2  | 0.0      | 0         |     |       |       |
| 19287468 - 1                                                   | R.VGEYSLYIGR.H | 1156.60 | 2 | 6e-006 | 3.220 | 0.492    | 1273.1    | 1   | 18/27 |       |

1 of 1 peptide matches reported, 0 removed due to filtering

DTA for scans: 19287468-1  
Precursor ion: 578.80  
Mass type: mono  
Mod's: (M\* +15.99492) C=161.01468

Ion series for charge: +1

| AA | A ions | B ions | B* ions | Bo ions | C ions | Y ions  | Y* ions | Yo ions | Z ions |
|----|--------|--------|---------|---------|--------|---------|---------|---------|--------|
| V  | 72.08  | 100.08 |         |         |        |         |         |         |        |
| G  | 129.10 | 157.10 |         |         |        | 1057.53 |         |         |        |
| E  | 258.14 | 286.14 |         |         |        | 1000.51 |         |         |        |
| Y  | 421.21 | 449.20 |         |         |        | 871.47  |         |         |        |
| S  | 508.24 | 536.24 |         |         |        | 708.40  |         |         |        |
| L  | 621.32 | 649.32 |         |         |        | 621.37  |         |         |        |
| Y  | 784.39 | 812.38 |         |         |        | 508.29  |         |         |        |
| I  | 897.47 | 925.47 |         |         |        | 345.22  |         |         |        |
| G  | 954.49 | 982.49 |         |         |        | 232.14  |         |         |        |
| R  |        |        |         |         |        | 175.12  |         |         |        |

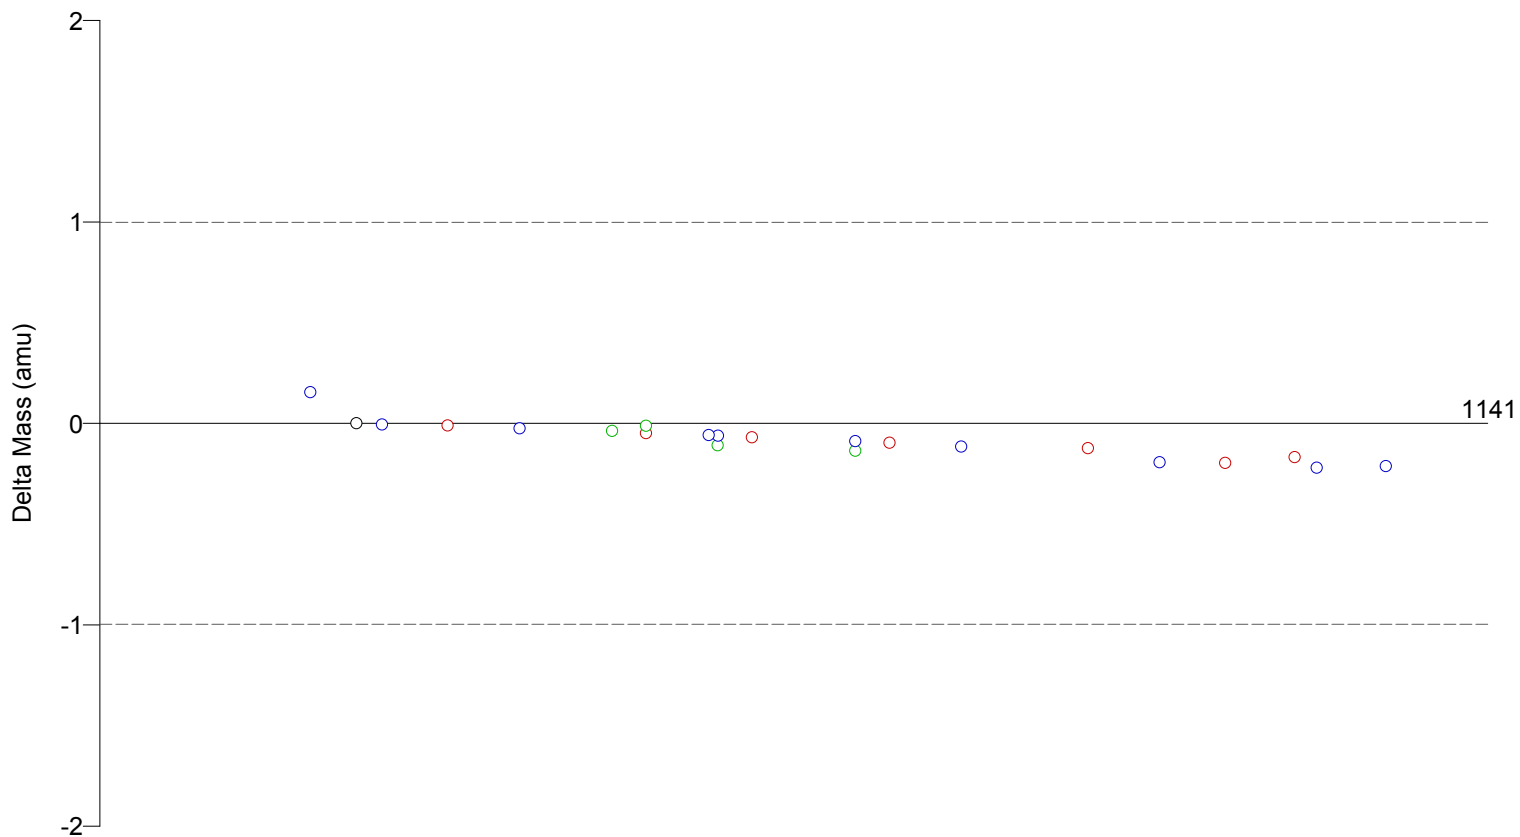

#19287468-1 NL: 1.83E5

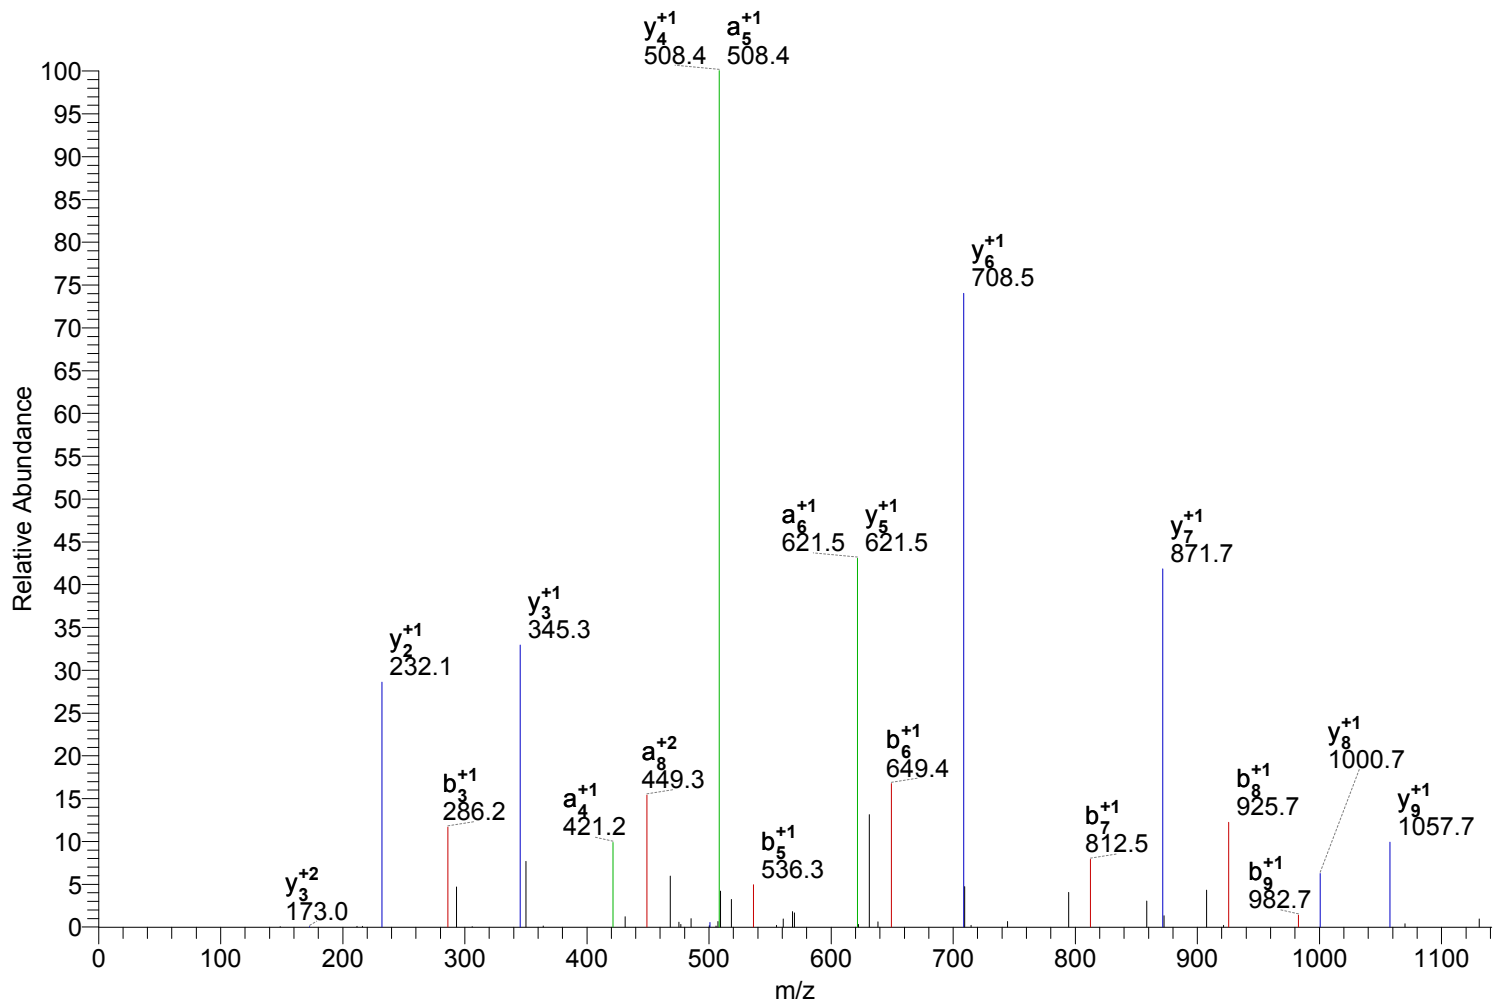

---

| Reference                                                      |          |         |   | P      | Score | Coverage | Accession |     |       |       |  |
|----------------------------------------------------------------|----------|---------|---|--------|-------|----------|-----------|-----|-------|-------|--|
| Scan(s)                                                        | Sequence | MH+     | z | P      | XC    | DeltaCn  | Sp        | RSp | Ions  | Count |  |
| IPI:IPI00166729.4 SWISS-PROT:P25311 ENSEMBL:ENSP00000292401 RE |          |         |   | 8e-006 | 10.1  | 0.0      | 0         |     |       |       |  |
| 2118291816 - R.YSLTYIYTGLSK.H                                  |          | 1408.74 | 2 | 8e-006 | 2.703 | 0.530    | 554.0     | 1   | 14/33 | 2     |  |

1 of 1 peptide matches reported, 0 removed due to filtering

DTA for scans: 2118291816-26226248  
Precursor ion: 704.87  
Mass type: mono  
Mod's: (M\* +15.99492) C=161.01468

Ion series for charge: +1

| AA | A ions        | B ions        | B* ions | Bo ions | C ions | Y ions         | Y* ions | Yo ions | Z ions |
|----|---------------|---------------|---------|---------|--------|----------------|---------|---------|--------|
| Y  | 136.08        | 164.07        |         |         |        |                |         |         |        |
| S  | 223.11        | <b>251.10</b> |         |         |        | 1245.67        |         |         |        |
| L  | 336.19        | 364.19        |         |         |        | <b>1158.64</b> |         |         |        |
| T  | 437.24        | <b>465.23</b> |         |         |        | <b>1045.56</b> |         |         |        |
| Y  | <b>600.30</b> | <b>628.30</b> |         |         |        | <b>944.51</b>  |         |         |        |
| I  | 713.39        | <b>741.38</b> |         |         |        | <b>781.45</b>  |         |         |        |
| Y  | 876.45        | 904.45        |         |         |        | <b>668.36</b>  |         |         |        |
| T  | 977.50        | 1005.49       |         |         |        | <b>505.30</b>  |         |         |        |
| G  | 1034.52       | 1062.51       |         |         |        | <b>404.25</b>  |         |         |        |
| L  | 1147.60       | 1175.60       |         |         |        | <b>347.23</b>  |         |         |        |
| S  | 1234.64       | 1262.63       |         |         |        | <b>234.14</b>  |         |         |        |
| K  |               |               |         |         |        | 147.11         |         |         |        |



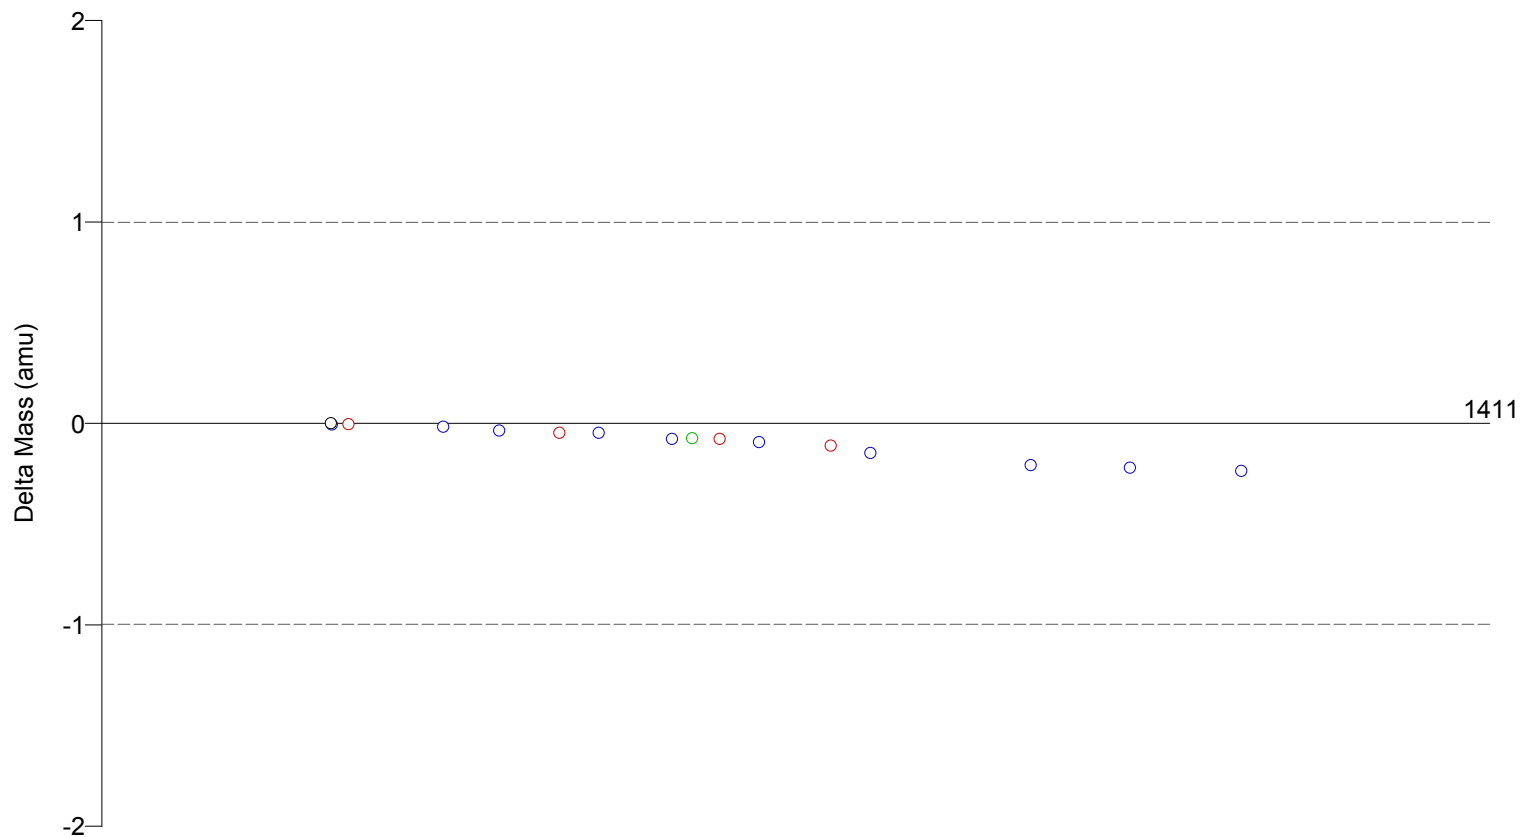

#2118291816-26226248 NL: 1.49E5

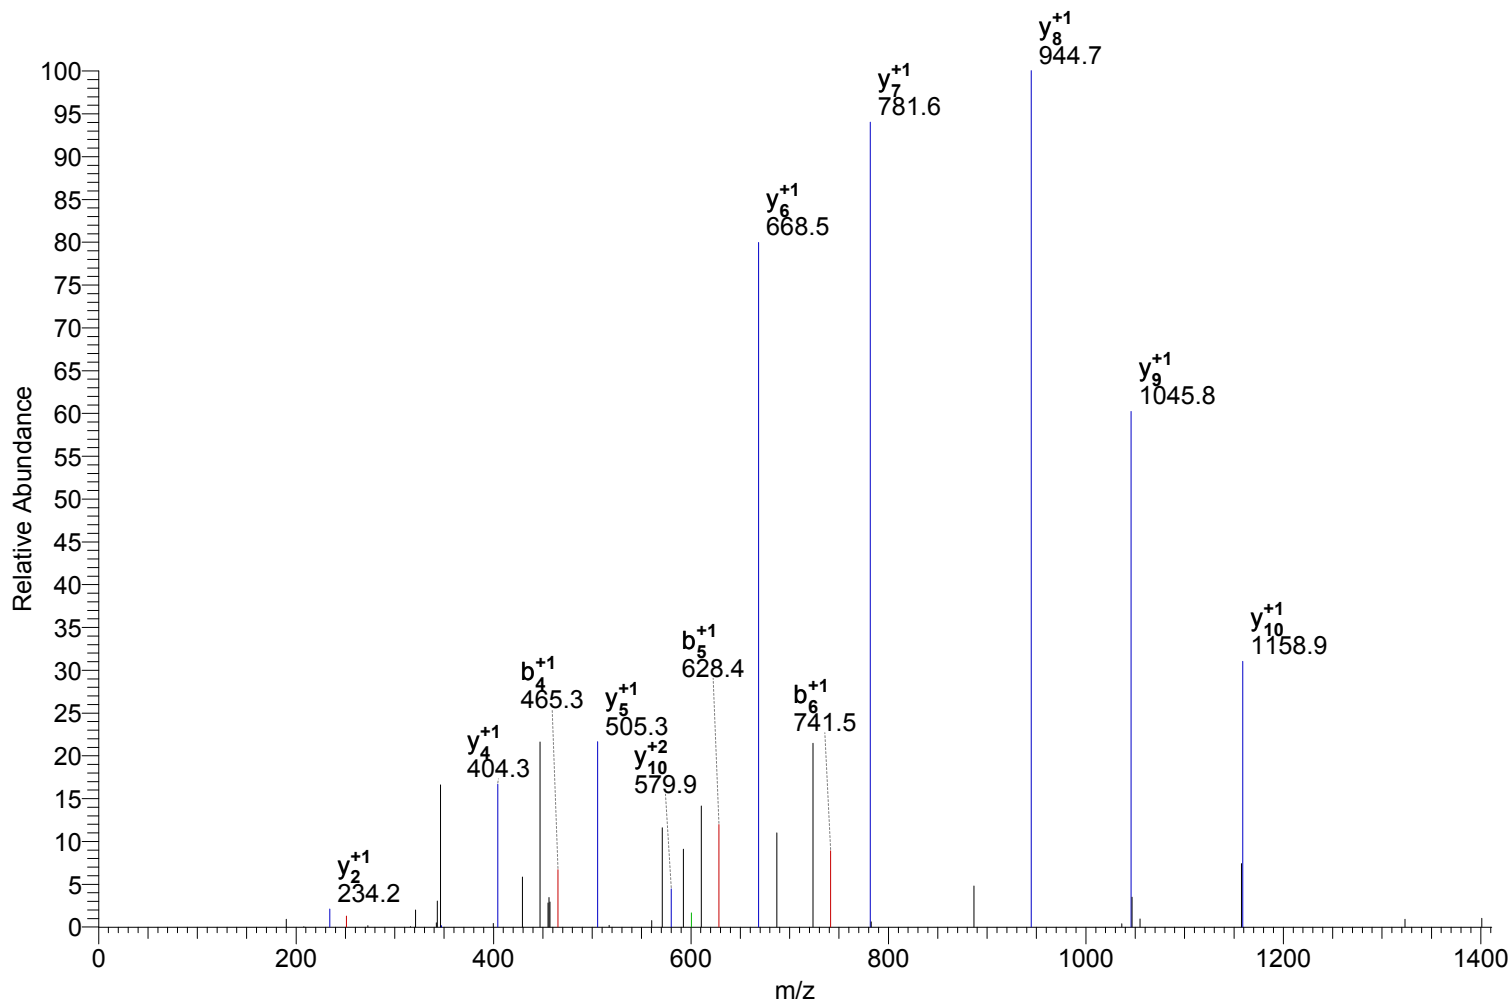

---

| Reference                          |          |         |   | P      | Score | Coverage | Accession |     |       |       |
|------------------------------------|----------|---------|---|--------|-------|----------|-----------|-----|-------|-------|
| Scan(s)                            | Sequence | MH+     | z | P      | XC    | DeltaCn  | Sp        | RSp | Ions  | Count |
| IPI:IPI00816309.1 TREMBL:A0JLQ0 Ta |          |         |   | 8e-006 | 10.1  | 0.0      | 0         |     |       |       |
| 2118291816 - R.YSLTYIYTGLSK.H      |          | 1408.74 | 2 | 8e-006 | 2.703 | 0.530    | 554.0     | 1   | 14/33 | 2     |

1 of 1 peptide matches reported, 0 removed due to filtering

DTA for scans: 2118291816-26226248  
Precursor ion: 704.87  
Mass type: mono  
Mod's: (M\* +15.99492) C=161.01468

Ion series for charge: +1

| AA | A ions        | B ions        | B* ions | Bo ions | C ions | Y ions         | Y* ions | Yo ions | Z ions |
|----|---------------|---------------|---------|---------|--------|----------------|---------|---------|--------|
| Y  | 136.08        | 164.07        |         |         |        |                |         |         |        |
| S  | 223.11        | <b>251.10</b> |         |         |        | 1245.67        |         |         |        |
| L  | 336.19        | 364.19        |         |         |        | <b>1158.64</b> |         |         |        |
| T  | 437.24        | <b>465.23</b> |         |         |        | <b>1045.56</b> |         |         |        |
| Y  | <b>600.30</b> | <b>628.30</b> |         |         |        | <b>944.51</b>  |         |         |        |
| I  | 713.39        | <b>741.38</b> |         |         |        | <b>781.45</b>  |         |         |        |
| Y  | 876.45        | 904.45        |         |         |        | <b>668.36</b>  |         |         |        |
| T  | 977.50        | 1005.49       |         |         |        | <b>505.30</b>  |         |         |        |
| G  | 1034.52       | 1062.51       |         |         |        | <b>404.25</b>  |         |         |        |
| L  | 1147.60       | 1175.60       |         |         |        | <b>347.23</b>  |         |         |        |
| S  | 1234.64       | 1262.63       |         |         |        | <b>234.14</b>  |         |         |        |
| K  |               |               |         |         |        | 147.11         |         |         |        |

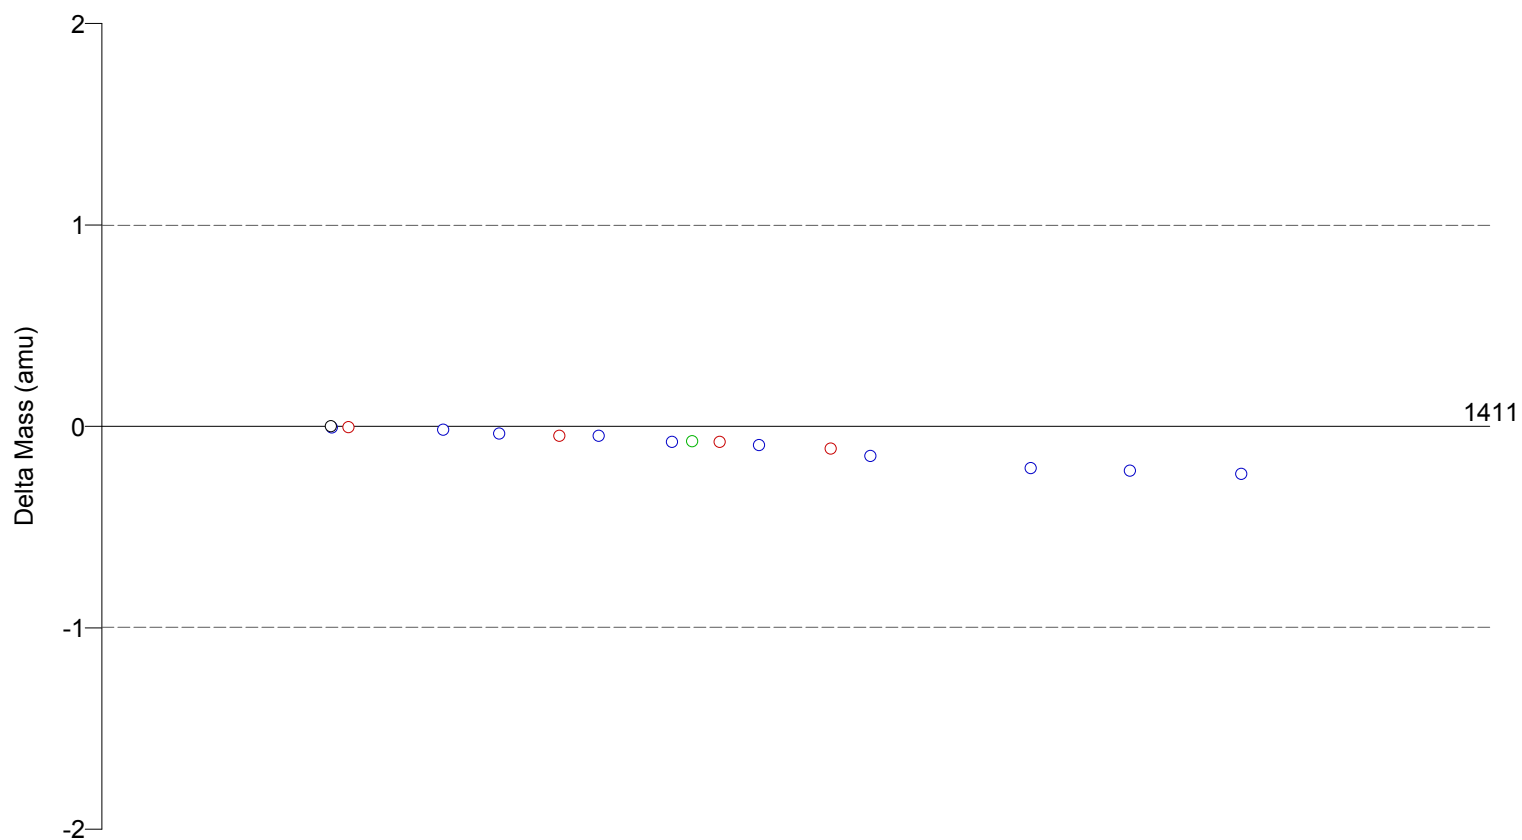

#2118291816-26226248 NL: 1.49E5



---

| Reference                          |                  |         |   | P      | Score | Coverage | Accession |     |       |       |
|------------------------------------|------------------|---------|---|--------|-------|----------|-----------|-----|-------|-------|
| Scan(s)                            | Sequence         | MH+     | z | P      | XC    | DeltaCn  | Sp        | RSp | Ions  | Count |
| IPI:IPI00924948.1 VEGA:OTTHUMP0000 |                  |         |   | 8e-006 | 10.1  | 0.0      | 0         |     |       |       |
| 2118291816 -                       | R.YSLTYIYTGLSK.H | 1408.74 | 2 | 8e-006 | 2.703 | 0.530    | 554.0     | 1   | 14/33 | 2     |

1 of 1 peptide matches reported, 0 removed due to filtering

DTA for scans: 2118291816-26226248  
Precursor ion: 704.87  
Mass type: mono  
Mod's: (M\* +15.99492) C=161.01468

Ion series for charge: +1

| AA | A ions        | B ions        | B* ions | Bo ions | C ions | Y ions         | Y* ions | Yo ions | Z ions |
|----|---------------|---------------|---------|---------|--------|----------------|---------|---------|--------|
| Y  | 136.08        | 164.07        |         |         |        |                |         |         |        |
| S  | 223.11        | <b>251.10</b> |         |         |        | 1245.67        |         |         |        |
| L  | 336.19        | 364.19        |         |         |        | <b>1158.64</b> |         |         |        |
| T  | 437.24        | <b>465.23</b> |         |         |        | <b>1045.56</b> |         |         |        |
| Y  | <b>600.30</b> | <b>628.30</b> |         |         |        | <b>944.51</b>  |         |         |        |
| I  | 713.39        | <b>741.38</b> |         |         |        | <b>781.45</b>  |         |         |        |
| Y  | 876.45        | 904.45        |         |         |        | <b>668.36</b>  |         |         |        |
| T  | 977.50        | 1005.49       |         |         |        | <b>505.30</b>  |         |         |        |
| G  | 1034.52       | 1062.51       |         |         |        | <b>404.25</b>  |         |         |        |
| L  | 1147.60       | 1175.60       |         |         |        | <b>347.23</b>  |         |         |        |
| S  | 1234.64       | 1262.63       |         |         |        | <b>234.14</b>  |         |         |        |
| K  |               |               |         |         |        | 147.11         |         |         |        |

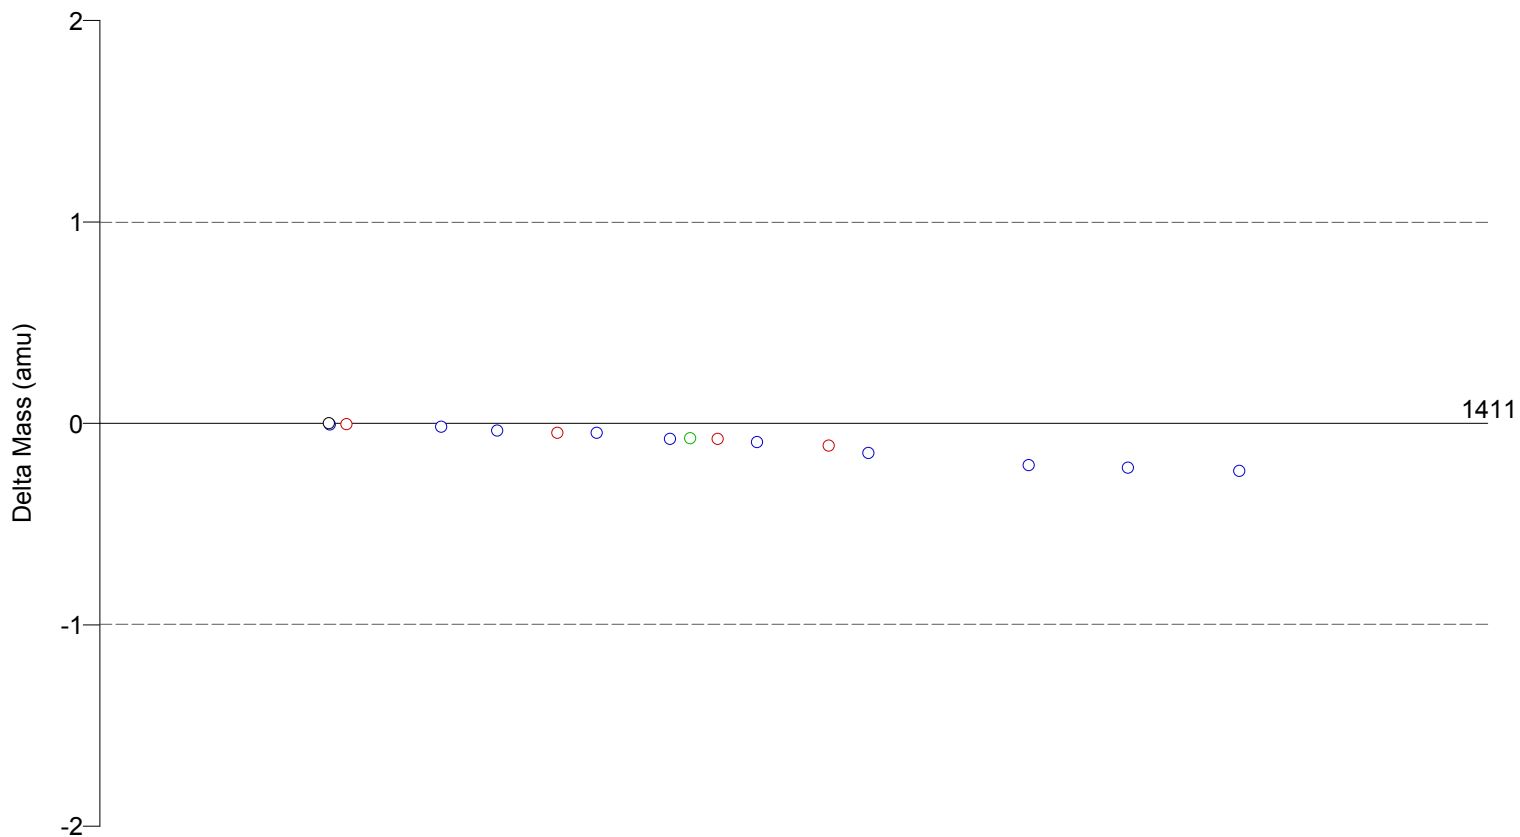

#2118291816-26226248 NL: 1.49E5



---

| Reference                                                      |          |         |   | P      | Score | Coverage | Accession |     |       |       |
|----------------------------------------------------------------|----------|---------|---|--------|-------|----------|-----------|-----|-------|-------|
| Scan(s)                                                        | Sequence | MH+     | z | P      | XC    | DeltaCn  | Sp        | RSp | Ions  | Count |
| IPI:IPI00292530.1 SWISS-PROT:P19827 TREMBL:A8K9N5;B7Z539;B7Z54 |          |         |   | 1e-005 | 10.2  | 0.0      | 0         |     |       |       |
| 19682592 - 21 R.GHMLENHVER.L                                   |          | 1221.58 | 2 | 1e-005 | 3.514 | 0.577    | 794.8     | 1   | 19/27 | 2     |

1 of 1 peptide matches reported, 0 removed due to filtering



DTA for scans: 19682592-2147340288  
Precursor ion: 611.29  
Mass type: mono  
Mod's: (M\* +15.99492) C=161.01468

Ion series for charge: +1

| AA | A ions        | B ions         | B* ions | Bo ions | C ions | Y ions         | Y* ions | Yo ions | Z ions |
|----|---------------|----------------|---------|---------|--------|----------------|---------|---------|--------|
| G  | 30.03         | 58.03          |         |         |        |                |         |         |        |
| H  | 167.09        | <b>195.09</b>  |         |         |        | 1164.56        |         |         |        |
| M  | 298.13        | <b>326.13</b>  |         |         |        | <b>1027.50</b> |         |         |        |
| L  | <b>411.22</b> | <b>439.21</b>  |         |         |        | <b>896.46</b>  |         |         |        |
| E  | <b>540.26</b> | <b>568.25</b>  |         |         |        | <b>783.37</b>  |         |         |        |
| N  | <b>654.30</b> | <b>682.30</b>  |         |         |        | <b>654.33</b>  |         |         |        |
| H  | 791.36        | <b>819.36</b>  |         |         |        | <b>540.29</b>  |         |         |        |
| V  | 890.43        | <b>918.43</b>  |         |         |        | <b>403.23</b>  |         |         |        |
| E  | 1019.47       | <b>1047.47</b> |         |         |        | <b>304.16</b>  |         |         |        |
| R  |               |                |         |         |        | <b>175.12</b>  |         |         |        |

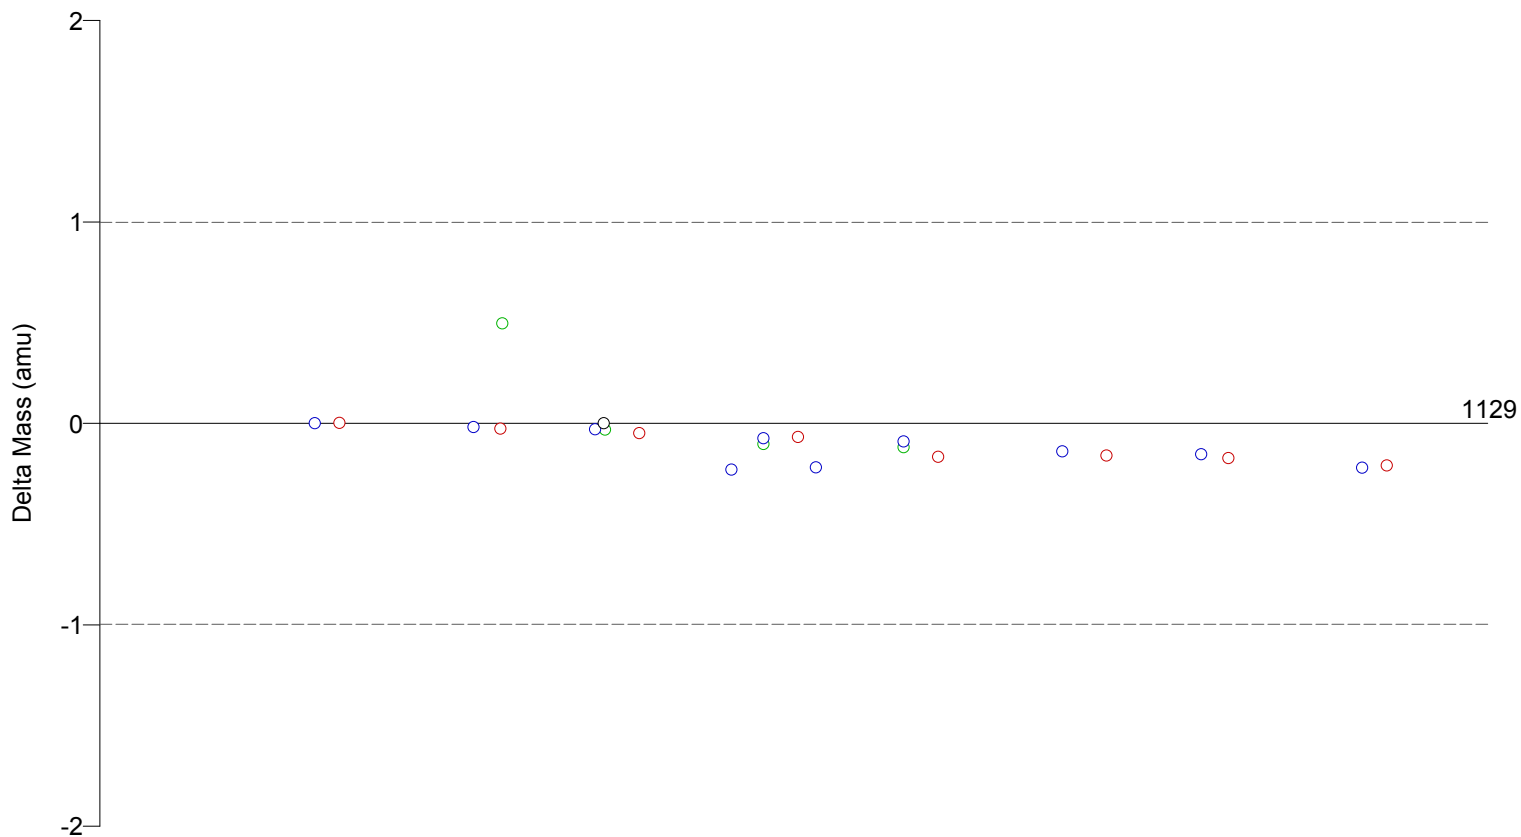

#19682592-2147340288 NL: 8.78E4

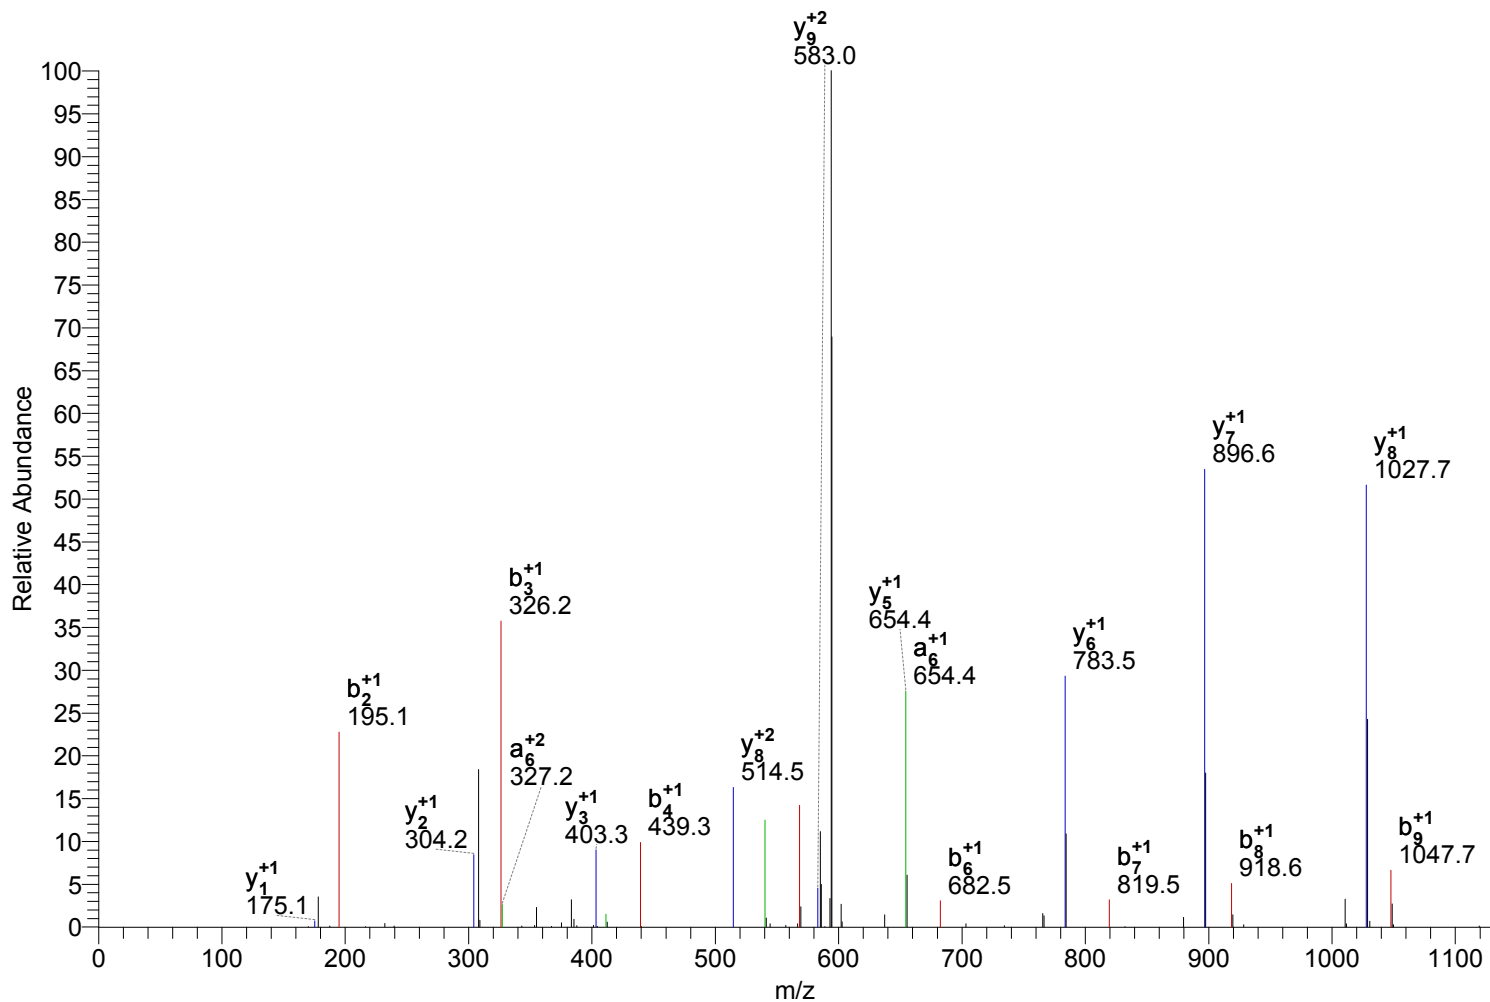

---

| Reference                          |          |         | P | Score  | Coverage | Accession |       |     |       |       |
|------------------------------------|----------|---------|---|--------|----------|-----------|-------|-----|-------|-------|
| Scan(s)                            | Sequence | MH+     | z | P      | XC       | DeltaCn   | Sp    | RSp | Ions  | Count |
| IPI:IPI00383338.1 TREMBL:Q9P1C5 VE |          |         |   | 1e-005 | 10.2     | 0.0       | 0     |     |       |       |
| 19682592 - 21 R.GHMLNHVER.L        |          | 1221.58 | 2 | 1e-005 | 3.514    | 0.577     | 794.8 | 1   | 19/27 | 2     |

1 of 1 peptide matches reported, 0 removed due to filtering

DTA for scans: 19682592-2147340288  
Precursor ion: 611.29  
Mass type: mono  
Mod's: (M\* +15.99492) C=161.01468

Ion series for charge: +1

| AA | A ions        | B ions         | B* ions | Bo ions | C ions | Y ions         | Y* ions | Yo ions | Z ions |
|----|---------------|----------------|---------|---------|--------|----------------|---------|---------|--------|
| G  | 30.03         | 58.03          |         |         |        |                |         |         |        |
| H  | 167.09        | <b>195.09</b>  |         |         |        | 1164.56        |         |         |        |
| M  | 298.13        | <b>326.13</b>  |         |         |        | <b>1027.50</b> |         |         |        |
| L  | <b>411.22</b> | <b>439.21</b>  |         |         |        | <b>896.46</b>  |         |         |        |
| E  | <b>540.26</b> | <b>568.25</b>  |         |         |        | <b>783.37</b>  |         |         |        |
| N  | <b>654.30</b> | <b>682.30</b>  |         |         |        | <b>654.33</b>  |         |         |        |
| H  | 791.36        | <b>819.36</b>  |         |         |        | <b>540.29</b>  |         |         |        |
| V  | 890.43        | <b>918.43</b>  |         |         |        | <b>403.23</b>  |         |         |        |
| E  | 1019.47       | <b>1047.47</b> |         |         |        | <b>304.16</b>  |         |         |        |
| R  |               |                |         |         |        | <b>175.12</b>  |         |         |        |



#19682592-2147340288 NL: 8.78E4



---

| Reference                          |          |         |   | P      | Score | Coverage | Accession |     |       |       |
|------------------------------------|----------|---------|---|--------|-------|----------|-----------|-----|-------|-------|
| Scan(s)                            | Sequence | MH+     | z | P      | XC    | DeltaCn  | Sp        | RSp | Ions  | Count |
| IPI:IPI00877852.1 VEGA:OTTHUMP0000 |          |         |   | 1e-005 | 10.2  | 0.0      | 0         |     |       |       |
| 19682592 - 21 R.GHMLNHVER.L        |          | 1221.58 | 2 | 1e-005 | 3.514 | 0.577    | 794.8     | 1   | 19/27 | 2     |

1 of 1 peptide matches reported, 0 removed due to filtering

DTA for scans: 19682592-2147340288  
Precursor ion: 611.29  
Mass type: mono  
Mod's: (M\* +15.99492) C=161.01468

Ion series for charge: +1

| AA | A ions        | B ions         | B* ions | Bo ions | C ions | Y ions         | Y* ions | Yo ions | Z ions |
|----|---------------|----------------|---------|---------|--------|----------------|---------|---------|--------|
| G  | 30.03         | 58.03          |         |         |        |                |         |         |        |
| H  | 167.09        | <b>195.09</b>  |         |         |        | 1164.56        |         |         |        |
| M  | 298.13        | <b>326.13</b>  |         |         |        | <b>1027.50</b> |         |         |        |
| L  | <b>411.22</b> | <b>439.21</b>  |         |         |        | <b>896.46</b>  |         |         |        |
| E  | <b>540.26</b> | <b>568.25</b>  |         |         |        | <b>783.37</b>  |         |         |        |
| N  | <b>654.30</b> | <b>682.30</b>  |         |         |        | <b>654.33</b>  |         |         |        |
| H  | 791.36        | <b>819.36</b>  |         |         |        | <b>540.29</b>  |         |         |        |
| V  | 890.43        | <b>918.43</b>  |         |         |        | <b>403.23</b>  |         |         |        |
| E  | 1019.47       | <b>1047.47</b> |         |         |        | <b>304.16</b>  |         |         |        |
| R  |               |                |         |         |        | <b>175.12</b>  |         |         |        |



#19682592-2147340288 NL: 8.78E4





---

| Reference                                                      |                |         |   | P      | Score | Coverage | Accession |     |       |       |
|----------------------------------------------------------------|----------------|---------|---|--------|-------|----------|-----------|-----|-------|-------|
| Scan(s)                                                        | Sequence       | MH+     | z | P      | XC    | DeltaCn  | Sp        | RSp | Ions  | Count |
| IPI:IPI00022434.4 TREMBL:A6NBZ8;B2RBS8;B4DPP6;Q56G89 ENSEMBL:E |                |         |   | 2e-005 | 20.2  | 0.0      | 0         |     |       |       |
| 19287468 - 1                                                   | K.CCTESLVNR.R  | 1140.47 | 2 | 0.0001 | 3.308 | 0.574    | 935.4     | 1   | 15/24 | 8     |
| 19287468 - 1                                                   | K.LVNEVTEFAK.T | 1149.62 | 2 | 2e-005 | 4.222 | 0.525    | 792.1     | 1   | 18/27 | 4     |

2 of 2 peptide matches reported, 0 removed due to filtering

DTA for scans: 19287468-1  
Precursor ion: 570.74  
Mass type: mono  
Mod's: (M\* +15.99492) C=161.01468

Ion series for charge: +1

| AA | A ions        | B ions        | B* ions | Bo ions | C ions | Y ions        | Y* ions | Yo ions | Z ions |
|----|---------------|---------------|---------|---------|--------|---------------|---------|---------|--------|
| C  | 134.03        | 162.02        |         |         |        |               |         |         |        |
| C  | <b>295.04</b> | <b>323.04</b> |         |         |        | 979.45        |         |         |        |
| T  | 396.09        | <b>424.08</b> |         |         |        | <b>818.44</b> |         |         |        |
| E  | 525.13        | <b>553.13</b> |         |         |        | <b>717.39</b> |         |         |        |
| S  | 612.16        | <b>640.16</b> |         |         |        | <b>588.35</b> |         |         |        |
| L  | 725.25        | <b>753.24</b> |         |         |        | <b>501.31</b> |         |         |        |
| V  | 824.32        | <b>852.31</b> |         |         |        | <b>388.23</b> |         |         |        |
| N  | 938.36        | <b>966.35</b> |         |         |        | <b>289.16</b> |         |         |        |
| R  |               |               |         |         |        | <b>175.12</b> |         |         |        |

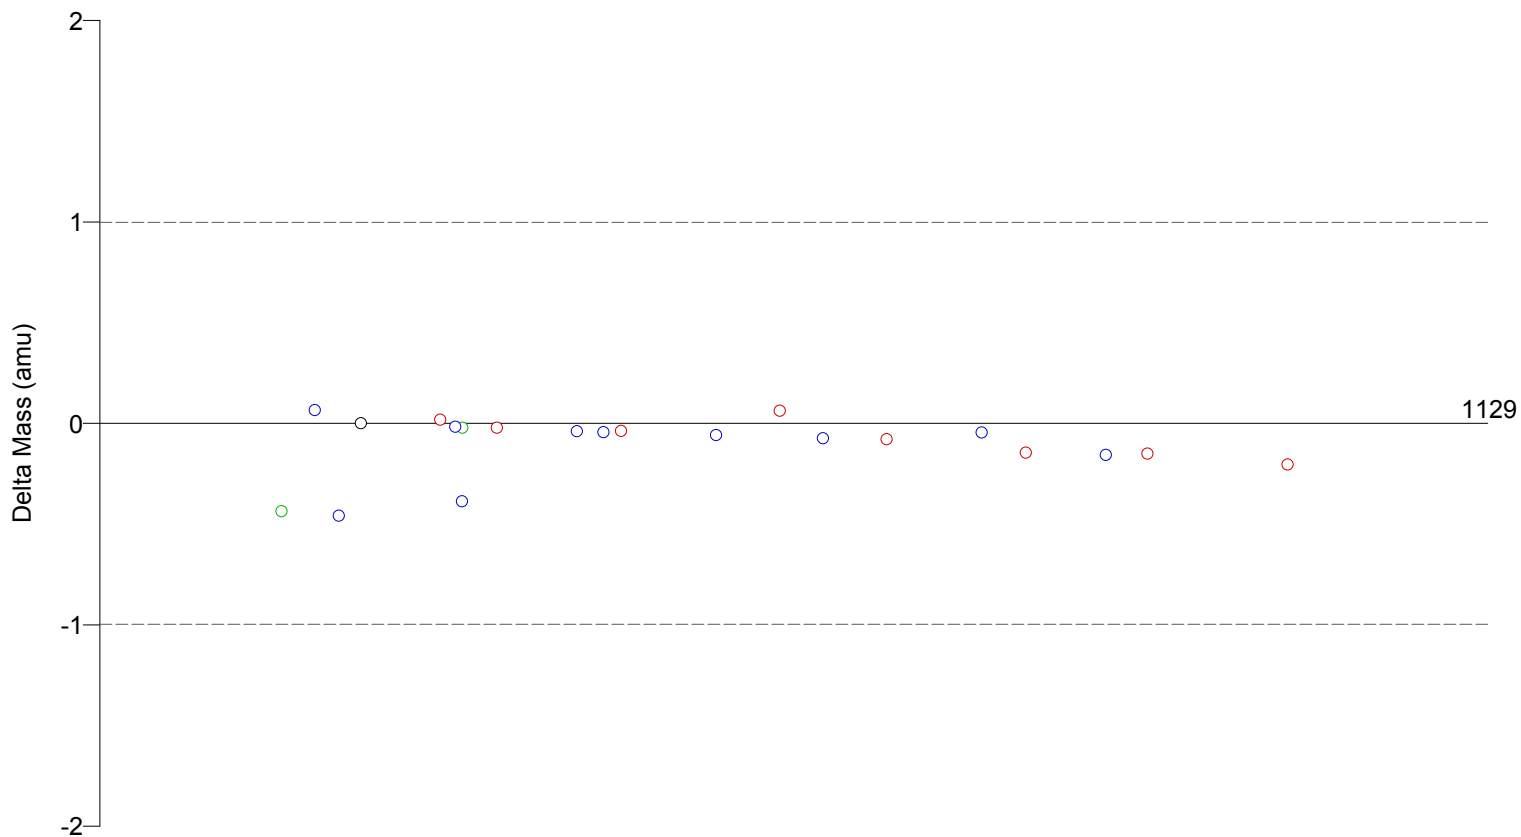

#19287468-1 NL: 8.98E6

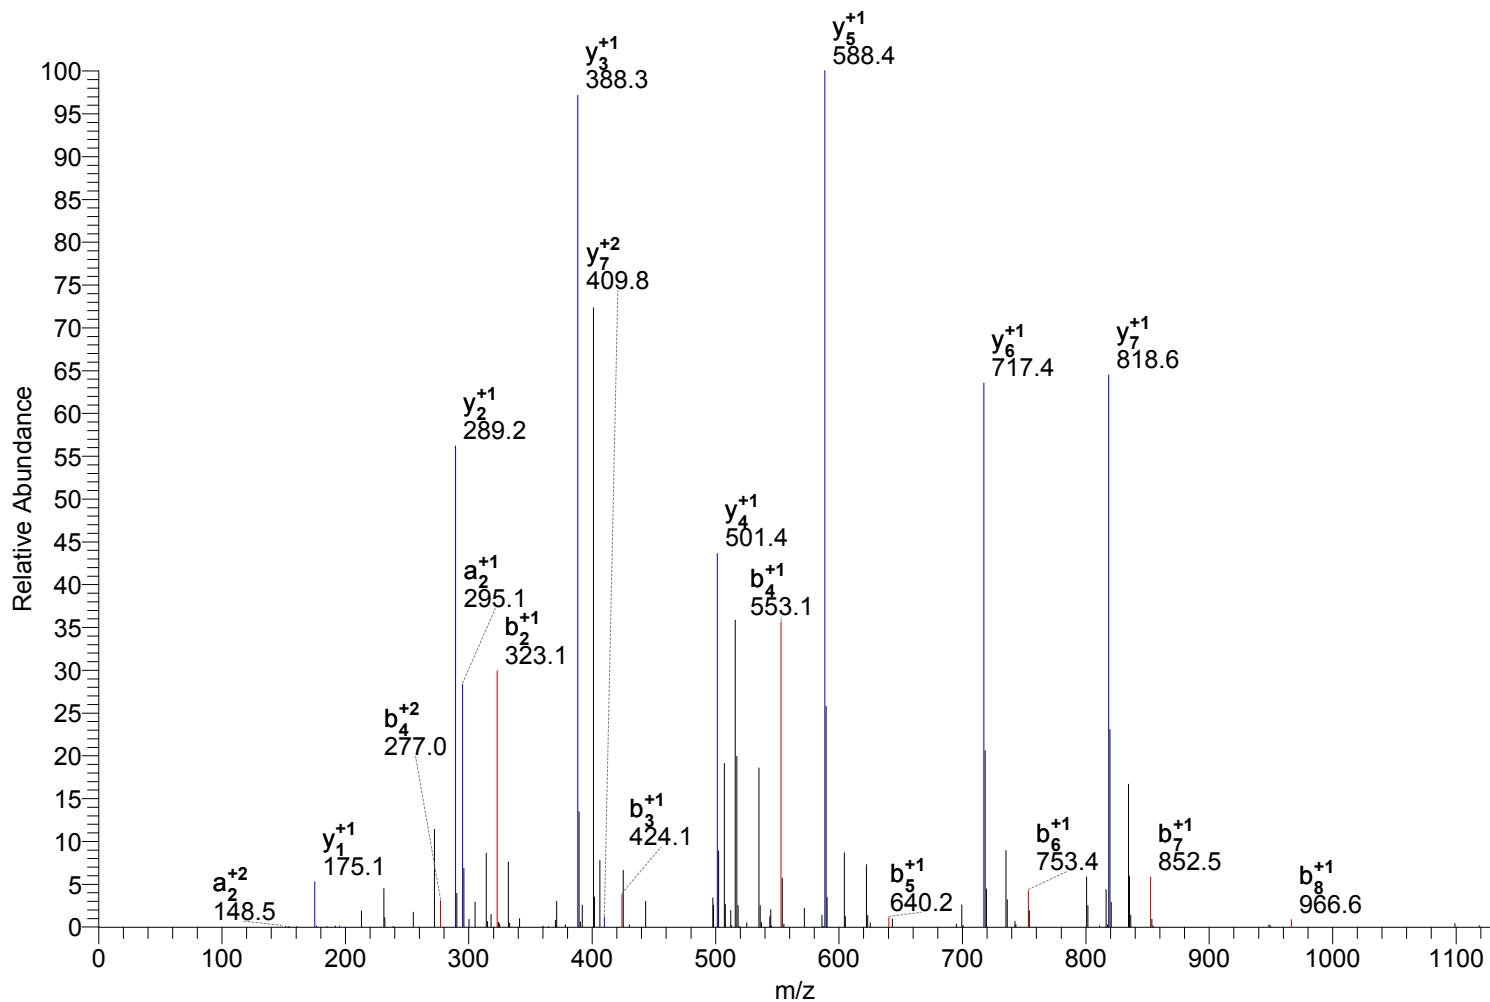

DTA for scans: 19287468-1  
Precursor ion: 575.31  
Mass type: mono  
Mod's: (M\* +15.99492) C=161.01468

Ion series for charge: +1

| AA | A ions        | B ions         | B* ions | Bo ions | C ions | Y ions         | Y* ions | Yo ions | Z ions |
|----|---------------|----------------|---------|---------|--------|----------------|---------|---------|--------|
| L  | 86.10         | 114.09         |         |         |        |                |         |         |        |
| V  | <b>185.16</b> | <b>213.16</b>  |         |         |        | <b>1036.53</b> |         |         |        |
| N  | <b>299.21</b> | <b>327.20</b>  |         |         |        | <b>937.46</b>  |         |         |        |
| E  | <b>428.25</b> | <b>456.25</b>  |         |         |        | <b>823.42</b>  |         |         |        |
| V  | <b>527.32</b> | <b>555.31</b>  |         |         |        | <b>694.38</b>  |         |         |        |
| T  | 628.37        | <b>656.36</b>  |         |         |        | <b>595.31</b>  |         |         |        |
| E  | 757.41        | <b>785.40</b>  |         |         |        | <b>494.26</b>  |         |         |        |
| F  | 904.48        | 932.47         |         |         |        | <b>365.22</b>  |         |         |        |
| A  | 975.51        | <b>1003.51</b> |         |         |        | <b>218.15</b>  |         |         |        |
| K  |               |                |         |         |        | <b>147.11</b>  |         |         |        |

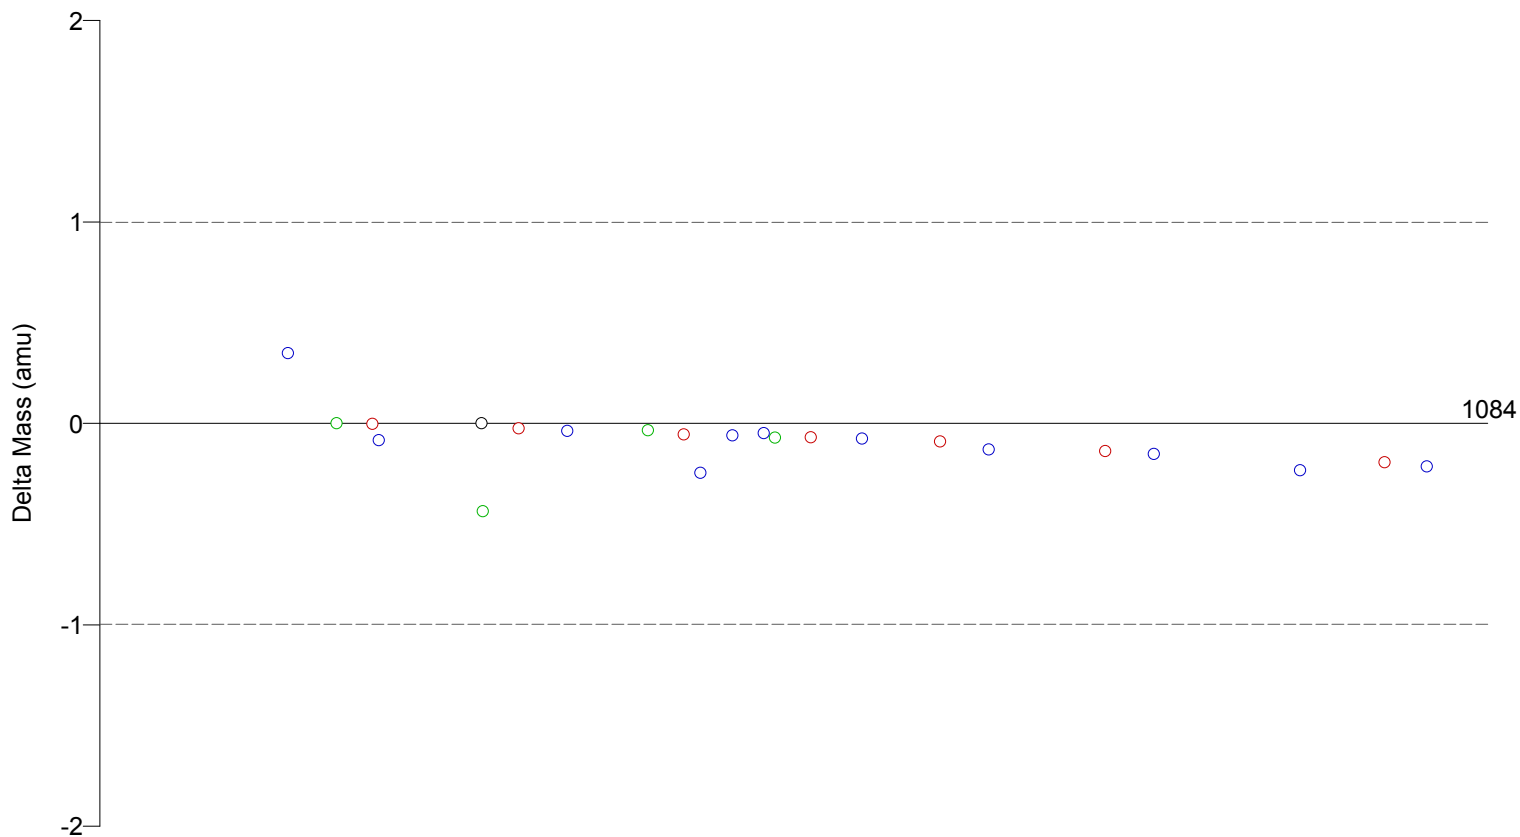

#19287468-1 NL: 3.94E6

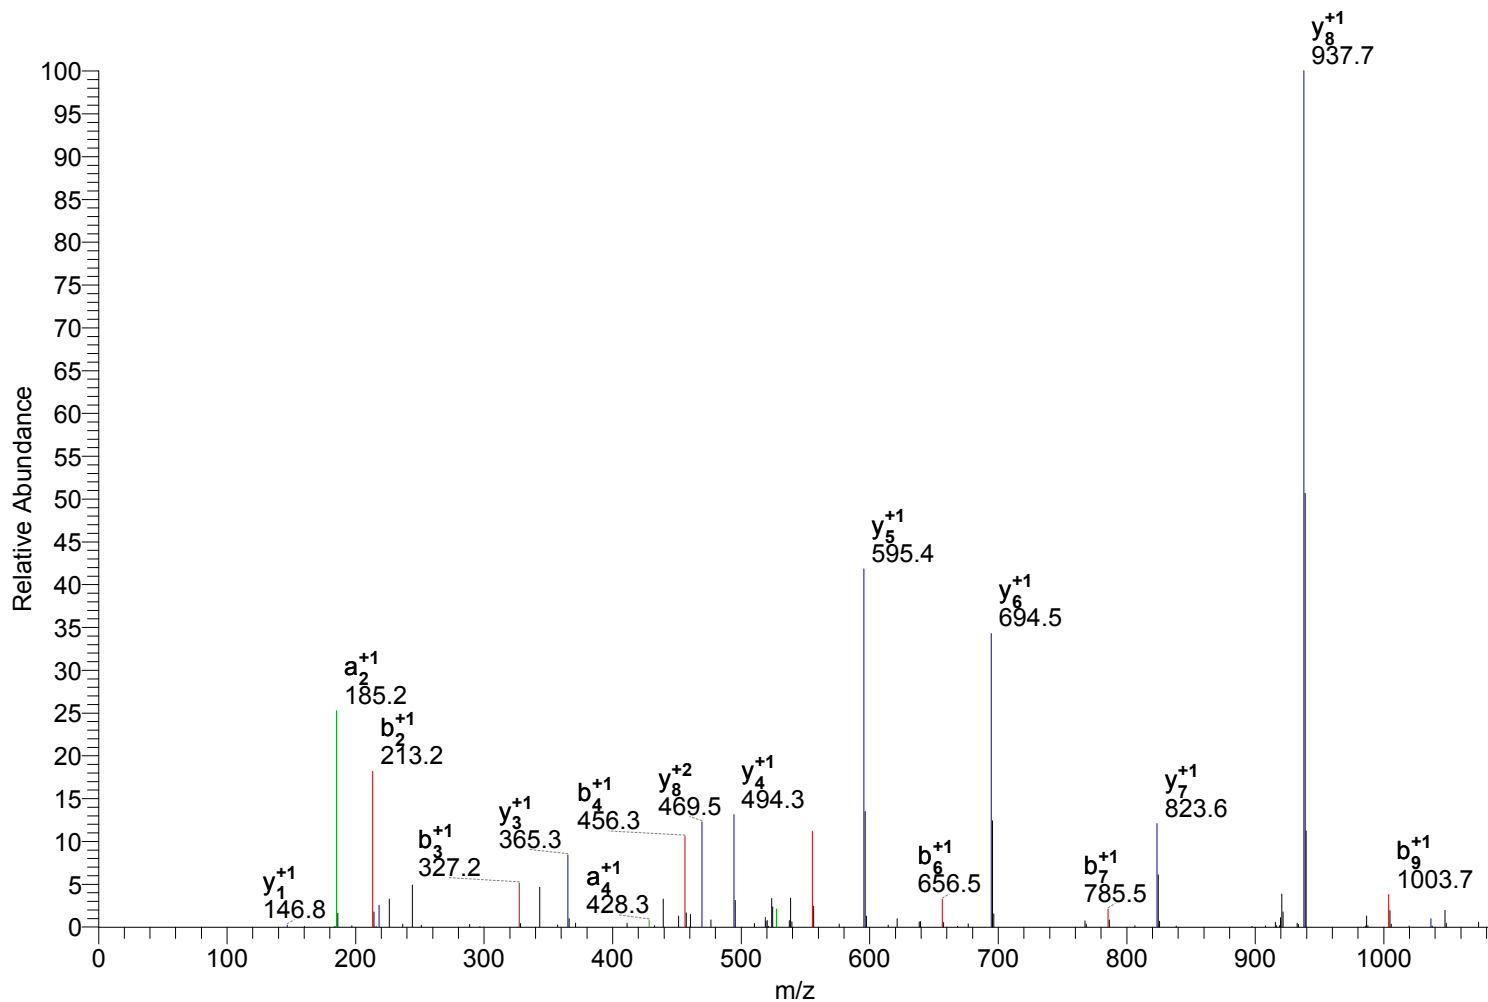

---

| Reference                          |                |         |   | P      | Score | Coverage | Accession |     |       |       |
|------------------------------------|----------------|---------|---|--------|-------|----------|-----------|-----|-------|-------|
| Scan(s)                            | Sequence       | MH+     | z | P      | XC    | DeltaCn  | Sp        | RSp | Ions  | Count |
| IPI:IPI00216773.4 TREMBL:Q8IUK7 EN |                |         |   | 2e-005 | 20.2  | 0.0      | 0         |     |       |       |
| 19287468 - 1                       | K.CCTESLVNR.R  | 1140.47 | 2 | 0.0001 | 3.308 | 0.574    | 935.4     | 1   | 15/24 | 8     |
| 19287468 - 1                       | K.LVNEVTEFAK.T | 1149.62 | 2 | 2e-005 | 4.222 | 0.525    | 792.1     | 1   | 18/27 | 4     |

2 of 2 peptide matches reported, 0 removed due to filtering

DTA for scans: 19287468-1  
Precursor ion: 570.74  
Mass type: mono  
Mod's: (M\* +15.99492) C=161.01468

Ion series for charge: +1

| AA | A ions        | B ions        | B* ions | Bo ions | C ions | Y ions        | Y* ions | Yo ions | Z ions |
|----|---------------|---------------|---------|---------|--------|---------------|---------|---------|--------|
| C  | 134.03        | 162.02        |         |         |        |               |         |         |        |
| C  | <b>295.04</b> | <b>323.04</b> |         |         |        | 979.45        |         |         |        |
| T  | 396.09        | <b>424.08</b> |         |         |        | <b>818.44</b> |         |         |        |
| E  | 525.13        | <b>553.13</b> |         |         |        | <b>717.39</b> |         |         |        |
| S  | 612.16        | <b>640.16</b> |         |         |        | <b>588.35</b> |         |         |        |
| L  | 725.25        | <b>753.24</b> |         |         |        | <b>501.31</b> |         |         |        |
| V  | 824.32        | <b>852.31</b> |         |         |        | <b>388.23</b> |         |         |        |
| N  | 938.36        | <b>966.35</b> |         |         |        | <b>289.16</b> |         |         |        |
| R  |               |               |         |         |        | <b>175.12</b> |         |         |        |

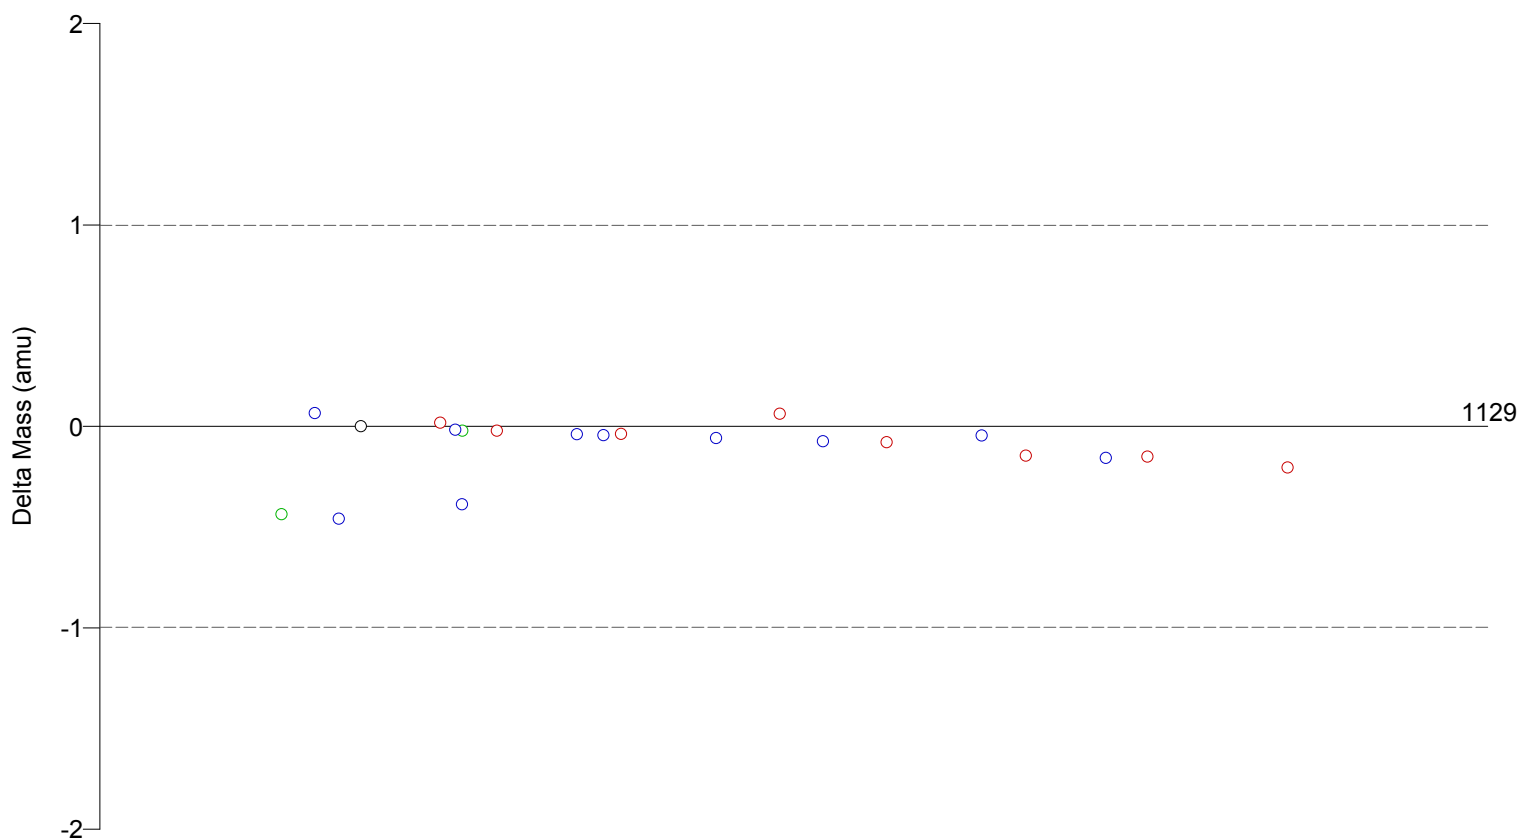

#19287468-1 NL: 8.98E6





DTA for scans: 19287468-1  
Precursor ion: 575.31  
Mass type: mono  
Mod's: (M\* +15.99492) C=161.01468

Ion series for charge: +1

| AA | A ions        | B ions         | B* ions | Bo ions | C ions | Y ions         | Y* ions | Yo ions | Z ions |
|----|---------------|----------------|---------|---------|--------|----------------|---------|---------|--------|
| L  | 86.10         | 114.09         |         |         |        |                |         |         |        |
| V  | <b>185.16</b> | <b>213.16</b>  |         |         |        | <b>1036.53</b> |         |         |        |
| N  | <b>299.21</b> | <b>327.20</b>  |         |         |        | <b>937.46</b>  |         |         |        |
| E  | <b>428.25</b> | <b>456.25</b>  |         |         |        | <b>823.42</b>  |         |         |        |
| V  | <b>527.32</b> | <b>555.31</b>  |         |         |        | <b>694.38</b>  |         |         |        |
| T  | 628.37        | <b>656.36</b>  |         |         |        | <b>595.31</b>  |         |         |        |
| E  | 757.41        | <b>785.40</b>  |         |         |        | <b>494.26</b>  |         |         |        |
| F  | 904.48        | 932.47         |         |         |        | <b>365.22</b>  |         |         |        |
| A  | 975.51        | <b>1003.51</b> |         |         |        | <b>218.15</b>  |         |         |        |
| K  |               |                |         |         |        | <b>147.11</b>  |         |         |        |



#19287468-1 NL: 3.94E6



---

| Reference                          |                |         |   | P      | Score | Coverage | Accession |     |       |       |
|------------------------------------|----------------|---------|---|--------|-------|----------|-----------|-----|-------|-------|
| Scan(s)                            | Sequence       | MH+     | z | P      | XC    | DeltaCn  | Sp        | RSp | Ions  | Count |
| IPI:IPI00745872.2 SWISS-PROT:P0276 |                |         |   | 2e-005 | 20.2  | 0.0      | 0         |     |       |       |
| 19287468 - 1                       | K.CCTESLVNR.R  | 1140.47 | 2 | 0.0001 | 3.308 | 0.574    | 935.4     | 1   | 15/24 | 8     |
| 19287468 - 1                       | K.LVNEVTEFAK.T | 1149.62 | 2 | 2e-005 | 4.222 | 0.525    | 792.1     | 1   | 18/27 | 4     |

2 of 2 peptide matches reported, 0 removed due to filtering

DTA for scans: 19287468-1  
Precursor ion: 570.74  
Mass type: mono  
Mod's: (M\* +15.99492) C=161.01468

Ion series for charge: +1

| AA | A ions        | B ions        | B* ions | Bo ions | C ions | Y ions        | Y* ions | Yo ions | Z ions |
|----|---------------|---------------|---------|---------|--------|---------------|---------|---------|--------|
| C  | 134.03        | 162.02        |         |         |        |               |         |         |        |
| C  | <b>295.04</b> | <b>323.04</b> |         |         |        | 979.45        |         |         |        |
| T  | 396.09        | <b>424.08</b> |         |         |        | <b>818.44</b> |         |         |        |
| E  | 525.13        | <b>553.13</b> |         |         |        | <b>717.39</b> |         |         |        |
| S  | 612.16        | <b>640.16</b> |         |         |        | <b>588.35</b> |         |         |        |
| L  | 725.25        | <b>753.24</b> |         |         |        | <b>501.31</b> |         |         |        |
| V  | 824.32        | <b>852.31</b> |         |         |        | <b>388.23</b> |         |         |        |
| N  | 938.36        | <b>966.35</b> |         |         |        | <b>289.16</b> |         |         |        |
| R  |               |               |         |         |        | <b>175.12</b> |         |         |        |

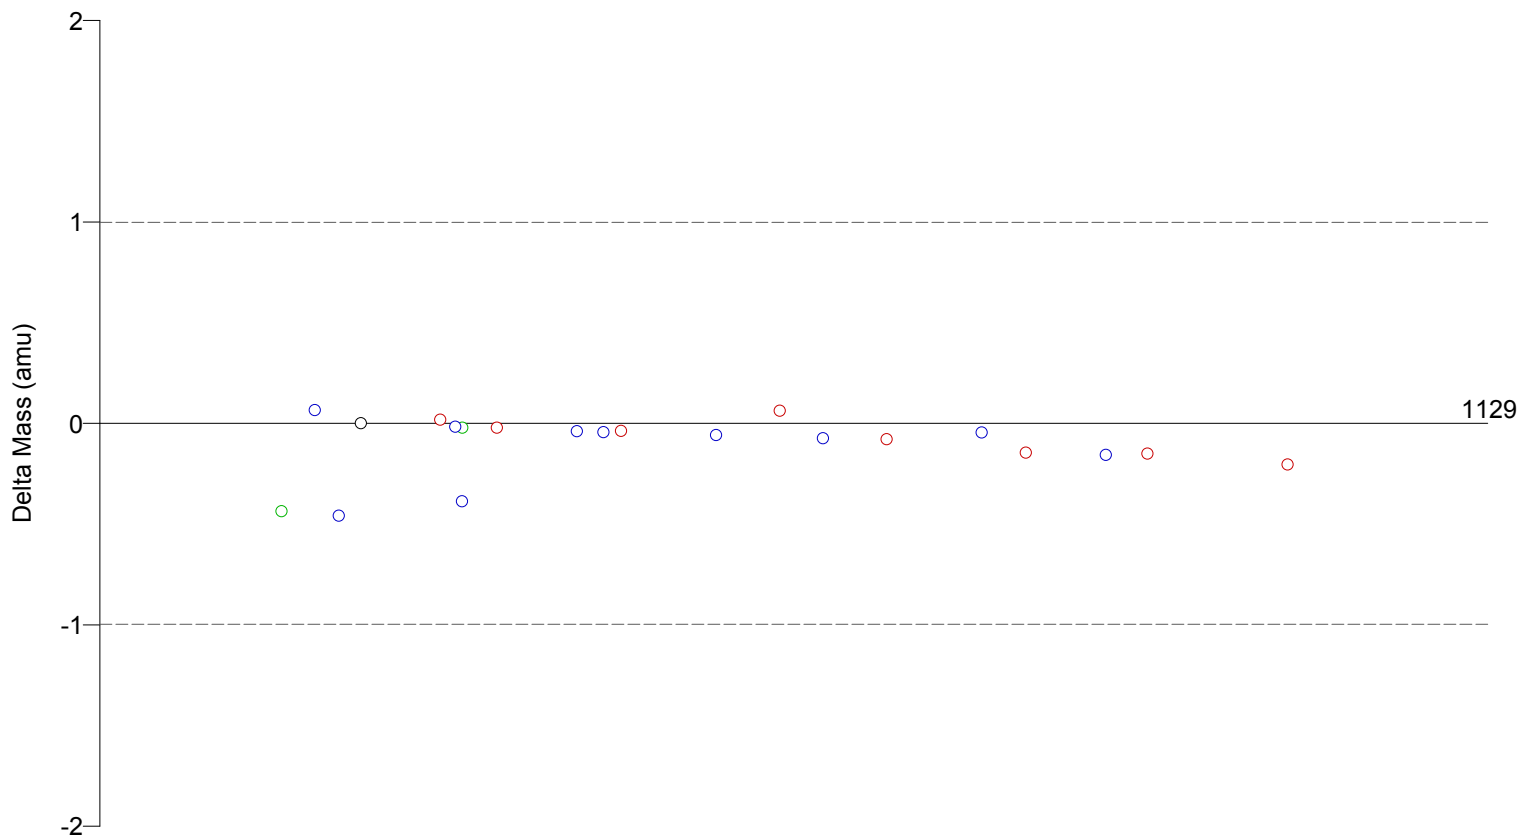

#19287468-1 NL: 8.98E6



DTA for scans: 19287468-1  
Precursor ion: 575.31  
Mass type: mono  
Mod's: (M\* +15.99492) C=161.01468

Ion series for charge: +1

| AA | A ions        | B ions         | B* ions | Bo ions | C ions | Y ions         | Y* ions | Yo ions | Z ions |
|----|---------------|----------------|---------|---------|--------|----------------|---------|---------|--------|
| L  | 86.10         | 114.09         |         |         |        |                |         |         |        |
| V  | <b>185.16</b> | <b>213.16</b>  |         |         |        | <b>1036.53</b> |         |         |        |
| N  | <b>299.21</b> | <b>327.20</b>  |         |         |        | <b>937.46</b>  |         |         |        |
| E  | <b>428.25</b> | <b>456.25</b>  |         |         |        | <b>823.42</b>  |         |         |        |
| V  | <b>527.32</b> | <b>555.31</b>  |         |         |        | <b>694.38</b>  |         |         |        |
| T  | 628.37        | <b>656.36</b>  |         |         |        | <b>595.31</b>  |         |         |        |
| E  | 757.41        | <b>785.40</b>  |         |         |        | <b>494.26</b>  |         |         |        |
| F  | 904.48        | 932.47         |         |         |        | <b>365.22</b>  |         |         |        |
| A  | 975.51        | <b>1003.51</b> |         |         |        | <b>218.15</b>  |         |         |        |
| K  |               |                |         |         |        | <b>147.11</b>  |         |         |        |



#19287468-1 NL: 3.94E6



| Reference                          |                |         |   | P      | Score | Coverage | Accession |        |       |       |
|------------------------------------|----------------|---------|---|--------|-------|----------|-----------|--------|-------|-------|
| Scan(s)                            | Sequence       | MH+     | z | P      | XC    | DeltaCn  | Sp        | RSp    | Ions  | Count |
| gi 113576 sp P02768 ALBU_HUMAN SER |                |         |   | 2e-005 | 20.2  | 0.0      |           | 113576 |       |       |
| 19287468 - 1                       | K.CCTESLVNR.R  | 1140.47 | 2 | 0.0001 | 3.308 | 0.574    | 935.4     | 1      | 15/24 | 8     |
| 19287468 - 1                       | K.LVNEVTEFAK.T | 1149.62 | 2 | 2e-005 | 4.222 | 0.525    | 792.1     | 1      | 18/27 | 4     |

2 of 2 peptide matches reported, 0 removed due to filtering



DTA for scans: 19287468-1  
Precursor ion: 570.74  
Mass type: mono  
Mod's: (M\* +15.99492) C=161.01468

Ion series for charge: +1

| AA | A ions        | B ions        | B* ions | Bo ions | C ions | Y ions        | Y* ions | Yo ions | Z ions |
|----|---------------|---------------|---------|---------|--------|---------------|---------|---------|--------|
| C  | 134.03        | 162.02        |         |         |        |               |         |         |        |
| C  | <b>295.04</b> | <b>323.04</b> |         |         |        | 979.45        |         |         |        |
| T  | 396.09        | <b>424.08</b> |         |         |        | <b>818.44</b> |         |         |        |
| E  | 525.13        | <b>553.13</b> |         |         |        | <b>717.39</b> |         |         |        |
| S  | 612.16        | <b>640.16</b> |         |         |        | <b>588.35</b> |         |         |        |
| L  | 725.25        | <b>753.24</b> |         |         |        | <b>501.31</b> |         |         |        |
| V  | 824.32        | <b>852.31</b> |         |         |        | <b>388.23</b> |         |         |        |
| N  | 938.36        | <b>966.35</b> |         |         |        | <b>289.16</b> |         |         |        |
| R  |               |               |         |         |        | <b>175.12</b> |         |         |        |



#19287468-1 NL: 8.98E6



DTA for scans: 19287468-1  
Precursor ion: 575.31  
Mass type: mono  
Mod's: (M\* +15.99492) C=161.01468

Ion series for charge: +1

| AA | A ions        | B ions         | B* ions | Bo ions | C ions | Y ions         | Y* ions | Yo ions | Z ions |
|----|---------------|----------------|---------|---------|--------|----------------|---------|---------|--------|
| L  | 86.10         | 114.09         |         |         |        |                |         |         |        |
| V  | <b>185.16</b> | <b>213.16</b>  |         |         |        | <b>1036.53</b> |         |         |        |
| N  | <b>299.21</b> | <b>327.20</b>  |         |         |        | <b>937.46</b>  |         |         |        |
| E  | <b>428.25</b> | <b>456.25</b>  |         |         |        | <b>823.42</b>  |         |         |        |
| V  | <b>527.32</b> | <b>555.31</b>  |         |         |        | <b>694.38</b>  |         |         |        |
| T  | 628.37        | <b>656.36</b>  |         |         |        | <b>595.31</b>  |         |         |        |
| E  | 757.41        | <b>785.40</b>  |         |         |        | <b>494.26</b>  |         |         |        |
| F  | 904.48        | 932.47         |         |         |        | <b>365.22</b>  |         |         |        |
| A  | 975.51        | <b>1003.51</b> |         |         |        | <b>218.15</b>  |         |         |        |
| K  |               |                |         |         |        | <b>147.11</b>  |         |         |        |



#19287468-1 NL: 3.94E6



---

| Reference                          |                |         |   | P      | Score | Coverage | Accession |     |       |       |
|------------------------------------|----------------|---------|---|--------|-------|----------|-----------|-----|-------|-------|
| Scan(s)                            | Sequence       | MH+     | z | P      | XC    | DeltaCn  | Sp        | RSp | Ions  | Count |
| IPI:IPI00878282.1 VEGA:OTTHUMP0000 |                |         |   | 2e-005 | 10.2  | 0.0      | 0         |     |       |       |
| 19287468 - 1                       | K.LVNEVTEFAK.T | 1149.62 | 2 | 2e-005 | 4.222 | 0.525    | 792.1     | 1   | 18/27 | 4     |

1 of 1 peptide matches reported, 0 removed due to filtering

DTA for scans: 19287468-1  
Precursor ion: 575.31  
Mass type: mono  
Mod's: (M\* +15.99492) C=161.01468

Ion series for charge: +1

| AA | A ions        | B ions         | B* ions | Bo ions | C ions | Y ions         | Y* ions | Yo ions | Z ions |
|----|---------------|----------------|---------|---------|--------|----------------|---------|---------|--------|
| L  | 86.10         | 114.09         |         |         |        |                |         |         |        |
| V  | <b>185.16</b> | <b>213.16</b>  |         |         |        | <b>1036.53</b> |         |         |        |
| N  | <b>299.21</b> | <b>327.20</b>  |         |         |        | <b>937.46</b>  |         |         |        |
| E  | <b>428.25</b> | <b>456.25</b>  |         |         |        | <b>823.42</b>  |         |         |        |
| V  | <b>527.32</b> | <b>555.31</b>  |         |         |        | <b>694.38</b>  |         |         |        |
| T  | 628.37        | <b>656.36</b>  |         |         |        | <b>595.31</b>  |         |         |        |
| E  | 757.41        | <b>785.40</b>  |         |         |        | <b>494.26</b>  |         |         |        |
| F  | 904.48        | 932.47         |         |         |        | <b>365.22</b>  |         |         |        |
| A  | 975.51        | <b>1003.51</b> |         |         |        | <b>218.15</b>  |         |         |        |
| K  |               |                |         |         |        | <b>147.11</b>  |         |         |        |



#19287468-1 NL: 3.94E6



---

| Reference                          |                            |         |   | P      | Score | Coverage | Accession |     |        |       |
|------------------------------------|----------------------------|---------|---|--------|-------|----------|-----------|-----|--------|-------|
| Scan(s)                            | Sequence                   | MH+     | z | P      | XC    | DeltaCn  | Sp        | RSp | Ions   | Count |
| IPI:IPI00418163.3 TREMBL:B4E344;Q6 |                            |         |   | 2e-005 | 20.2  | 0.0      |           | 0   |        |       |
| 19287468 - 1                       | K.ASAGLLGAHAAAITAYALTLTK.A | 2085.17 | 3 | 2e-005 | 3.435 | 0.549    | 736.3     | 1   | 26/126 | 8     |
| 2118291816 -                       | K.ITQVLHFTK.D              | 1086.63 | 2 | 0.0002 | 3.684 | 0.435    | 1215.2    | 1   | 18/24  | 10    |

2 of 2 peptide matches reported, 0 removed due to filtering



DTA for scans: 19287468-1  
Precursor ion: 695.73  
Mass type: mono  
Mod's: (M\* +15.99492) C=161.01468

Ion series for charge: +1

| AA | A ions        | B ions         | B* ions | Bo ions | C ions | Y ions         | Y* ions | Yo ions | Z ions |
|----|---------------|----------------|---------|---------|--------|----------------|---------|---------|--------|
| A  | 44.05         | 72.04          |         |         |        |                |         |         |        |
| S  | 131.08        | 159.08         |         |         |        | 2014.13        |         |         |        |
| A  | 202.12        | 230.11         |         |         |        | 1927.10        |         |         |        |
| G  | 259.14        | 287.13         |         |         |        | 1856.06        |         |         |        |
| L  | 372.22        | 400.22         |         |         |        | 1799.04        |         |         |        |
| L  | 485.31        | 513.30         |         |         |        | 1685.96        |         |         |        |
| G  | 542.33        | 570.32         |         |         |        | 1572.87        |         |         |        |
| A  | 613.37        | 641.36         |         |         |        | 1515.85        |         |         |        |
| H  | 750.43        | 778.42         |         |         |        | 1444.82        |         |         |        |
| A  | 821.46        | 849.46         |         |         |        | 1307.76        |         |         |        |
| A  | 892.50        | <b>920.49</b>  |         |         |        | 1236.72        |         |         |        |
| A  | <b>963.54</b> | <b>991.53</b>  |         |         |        | 1165.68        |         |         |        |
| I  | 1076.62       | <b>1104.62</b> |         |         |        | <b>1094.65</b> |         |         |        |
| T  | 1177.67       | 1205.66        |         |         |        | <b>981.56</b>  |         |         |        |
| A  | 1248.71       | 1276.70        |         |         |        | <b>880.51</b>  |         |         |        |
| Y  | 1411.77       | 1439.76        |         |         |        | <b>809.48</b>  |         |         |        |
| A  | 1482.81       | 1510.80        |         |         |        | <b>646.41</b>  |         |         |        |
| L  | 1595.89       | 1623.89        |         |         |        | <b>575.38</b>  |         |         |        |
| T  | 1696.94       | 1724.93        |         |         |        | <b>462.29</b>  |         |         |        |
| L  | 1810.02       | 1838.02        |         |         |        | <b>361.24</b>  |         |         |        |
| T  | 1911.07       | 1939.06        |         |         |        | <b>248.16</b>  |         |         |        |
| K  |               |                |         |         |        | 147.11         |         |         |        |

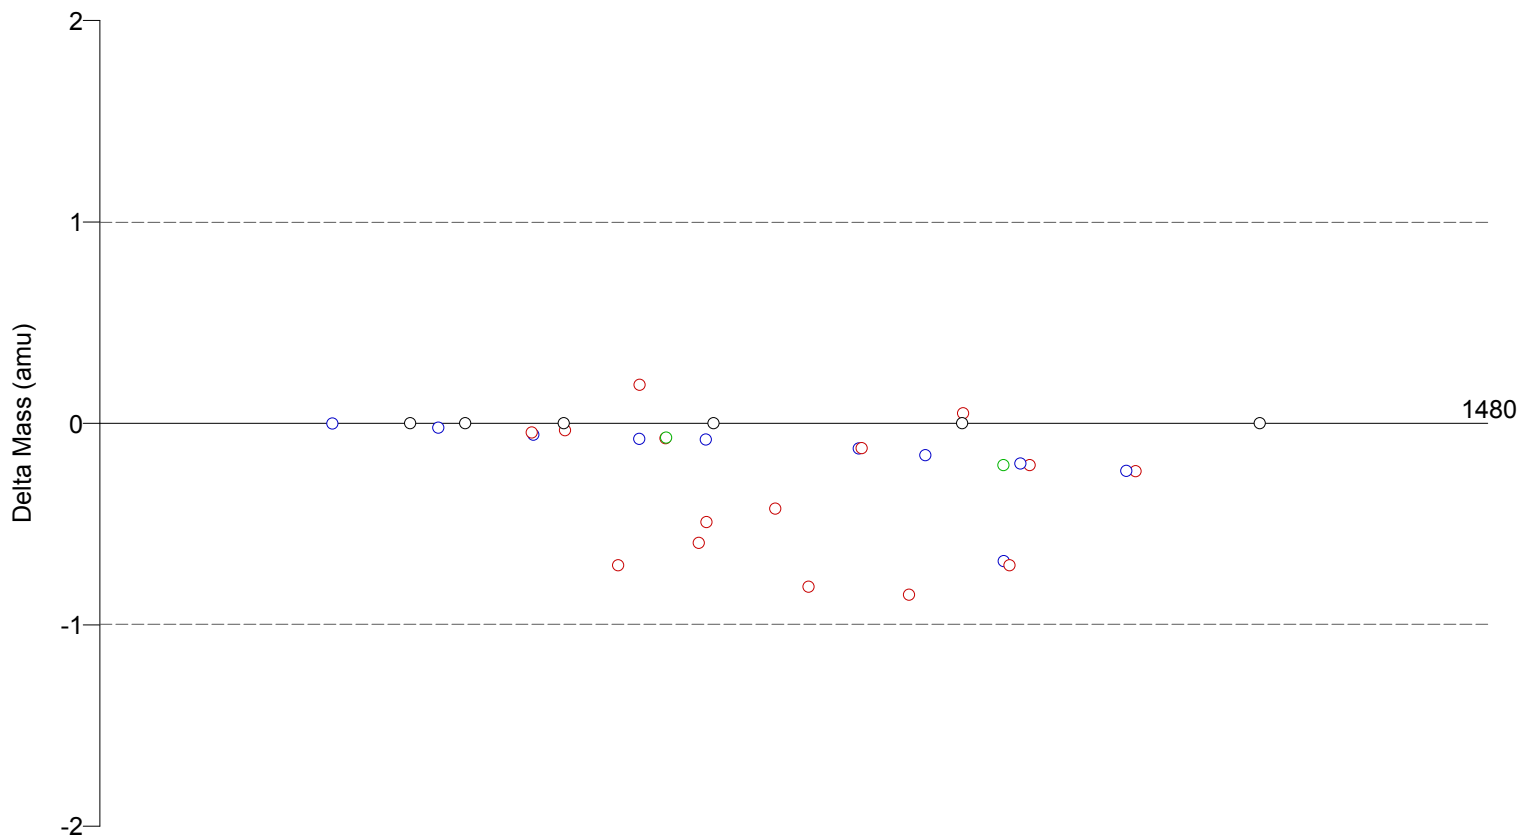

#19287468-1 NL: 5.80E4

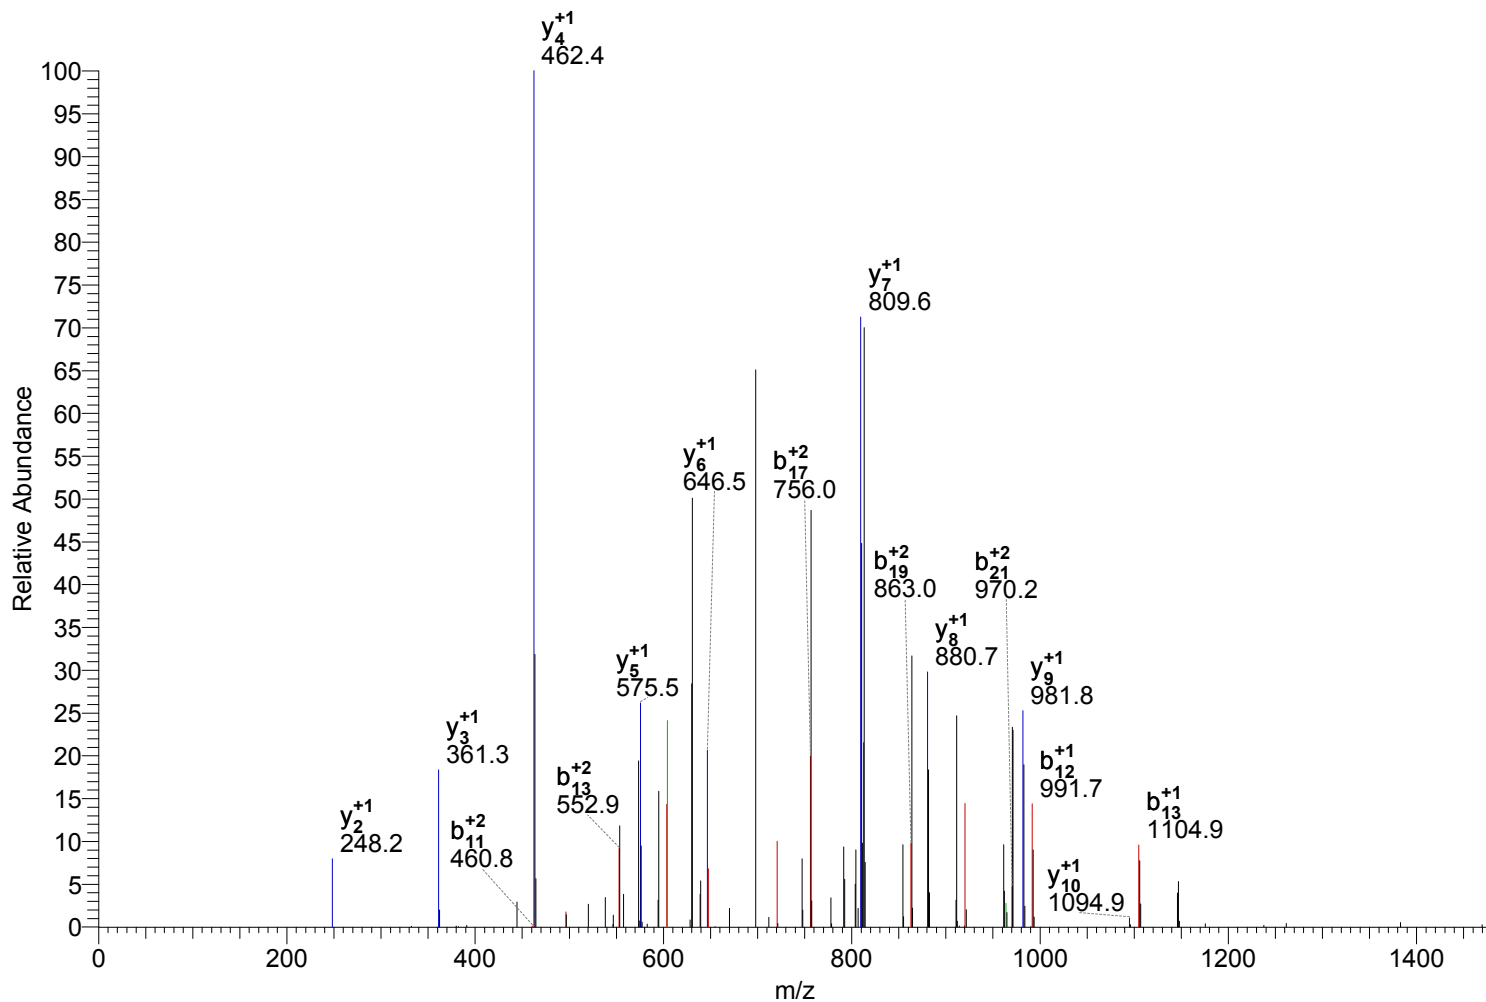

DTA for scans: 2118291816-26226248  
Precursor ion: 543.82  
Mass type: mono  
Mod's: (M\* +15.99492) C=161.01468

Ion series for charge: +1

| AA | A ions        | B ions        | B* ions | Bo ions | C ions | Y ions        | Y* ions | Yo ions | Z ions |
|----|---------------|---------------|---------|---------|--------|---------------|---------|---------|--------|
| I  | 86.10         | 114.09        |         |         |        |               |         |         |        |
| T  | <b>187.14</b> | <b>215.14</b> |         |         |        | <b>973.55</b> |         |         |        |
| Q  | 315.20        | <b>343.20</b> |         |         |        | <b>872.50</b> |         |         |        |
| V  | <b>414.27</b> | <b>442.27</b> |         |         |        | <b>744.44</b> |         |         |        |
| L  | <b>527.36</b> | <b>555.35</b> |         |         |        | <b>645.37</b> |         |         |        |
| H  | <b>664.41</b> | <b>692.41</b> |         |         |        | <b>532.29</b> |         |         |        |
| F  | 811.48        | <b>839.48</b> |         |         |        | <b>395.23</b> |         |         |        |
| T  | 912.53        | <b>940.53</b> |         |         |        | <b>248.16</b> |         |         |        |
| K  |               |               |         |         |        | 147.11        |         |         |        |

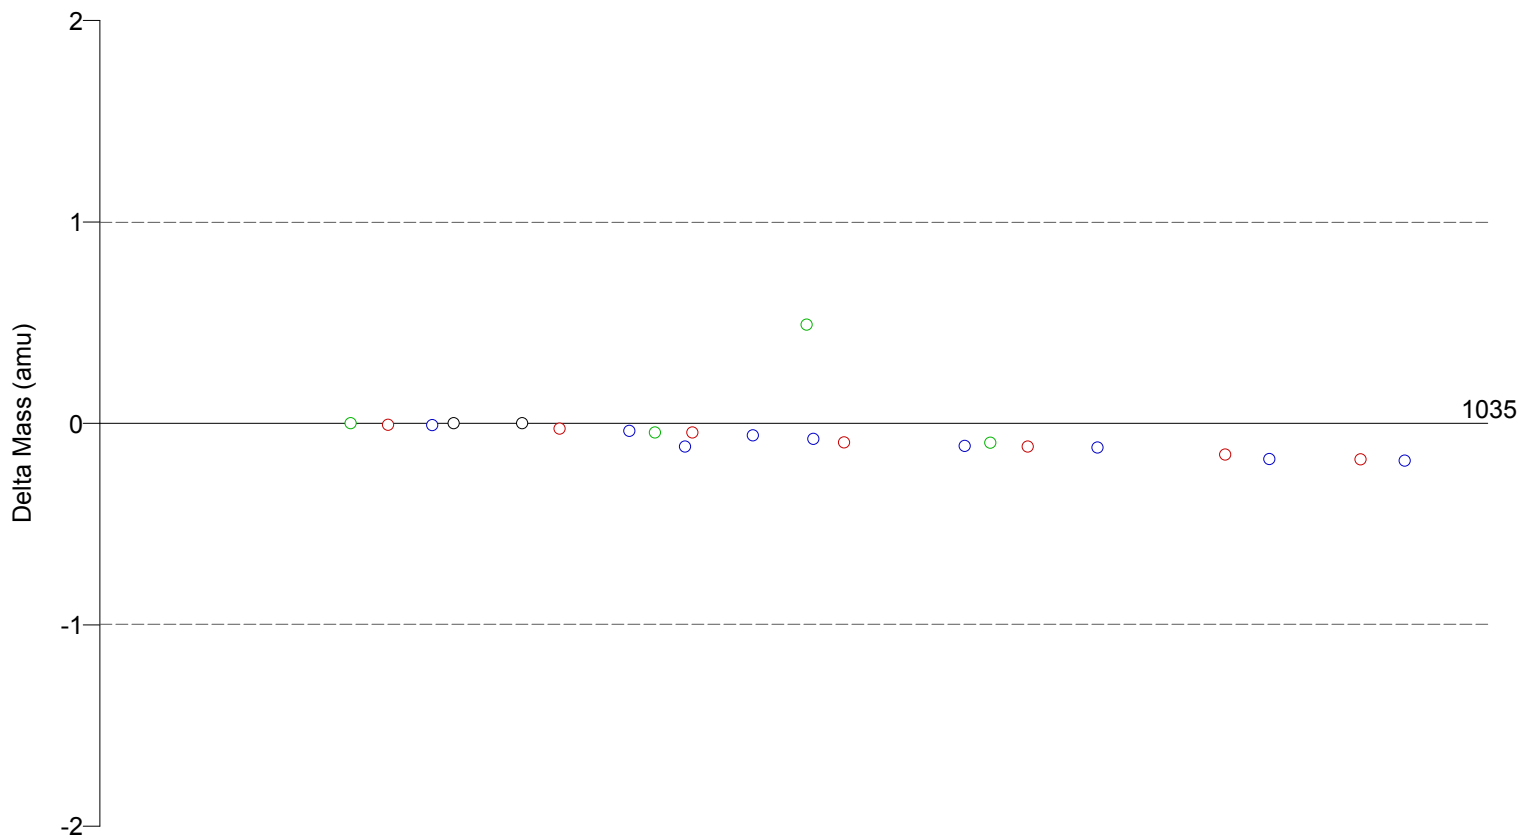

#2118291816-26226248 NL: 1.21E5

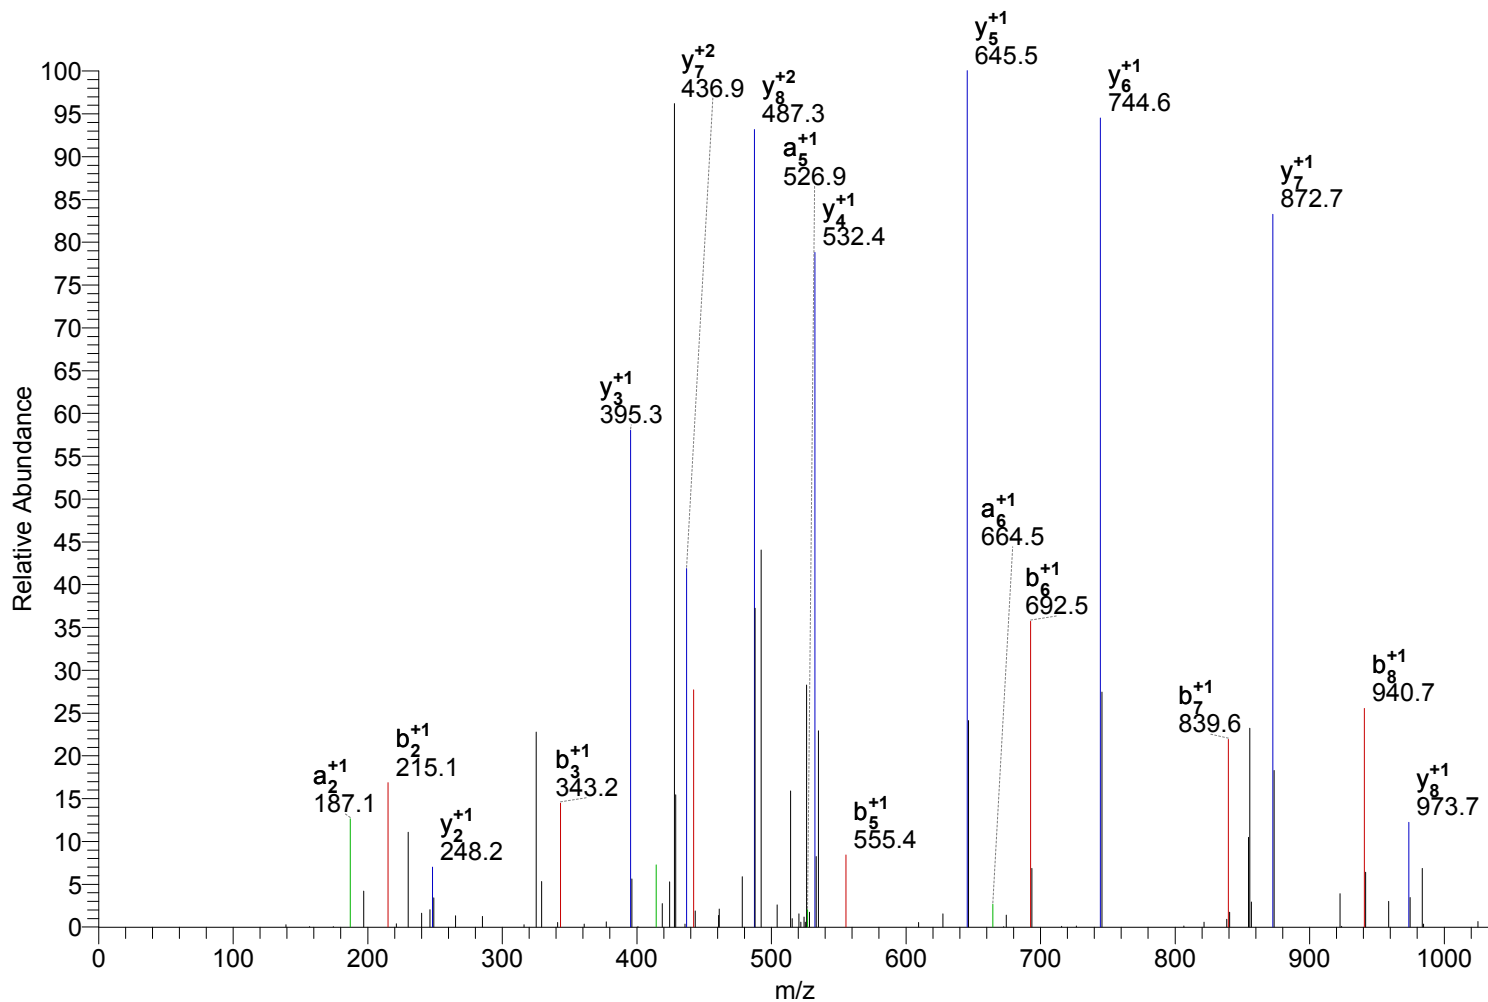

---

| Reference                          |                            |         |   | P      | Score | Coverage | Accession |     |        |       |
|------------------------------------|----------------------------|---------|---|--------|-------|----------|-----------|-----|--------|-------|
| Scan(s)                            | Sequence                   | MH+     | z | P      | XC    | DeltaCn  | Sp        | RSp | Ions   | Count |
| IPI:IPI00643525.1 TREMBL:A7E2V2;B4 |                            |         |   | 2e-005 | 20.2  | 0.0      |           | 0   |        |       |
| 19287468 - 1                       | K.ASAGLLGAHAAAITAYALTLTK.A | 2085.17 | 3 | 2e-005 | 3.435 | 0.549    | 736.3     | 1   | 26/126 | 8     |
| 2118291816 -                       | K.ITQVLHFTK.D              | 1086.63 | 2 | 0.0002 | 3.684 | 0.435    | 1215.2    | 1   | 18/24  | 10    |

2 of 2 peptide matches reported, 0 removed due to filtering

DTA for scans: 19287468-1  
Precursor ion: 695.73  
Mass type: mono  
Mod's: (M\* +15.99492) C=161.01468

Ion series for charge: +1

| AA | A ions        | B ions         | B* ions | Bo ions | C ions | Y ions         | Y* ions | Yo ions | Z ions |
|----|---------------|----------------|---------|---------|--------|----------------|---------|---------|--------|
| A  | 44.05         | 72.04          |         |         |        |                |         |         |        |
| S  | 131.08        | 159.08         |         |         |        | 2014.13        |         |         |        |
| A  | 202.12        | 230.11         |         |         |        | 1927.10        |         |         |        |
| G  | 259.14        | 287.13         |         |         |        | 1856.06        |         |         |        |
| L  | 372.22        | 400.22         |         |         |        | 1799.04        |         |         |        |
| L  | 485.31        | 513.30         |         |         |        | 1685.96        |         |         |        |
| G  | 542.33        | 570.32         |         |         |        | 1572.87        |         |         |        |
| A  | 613.37        | 641.36         |         |         |        | 1515.85        |         |         |        |
| H  | 750.43        | 778.42         |         |         |        | 1444.82        |         |         |        |
| A  | 821.46        | 849.46         |         |         |        | 1307.76        |         |         |        |
| A  | 892.50        | <b>920.49</b>  |         |         |        | 1236.72        |         |         |        |
| A  | <b>963.54</b> | <b>991.53</b>  |         |         |        | 1165.68        |         |         |        |
| I  | 1076.62       | <b>1104.62</b> |         |         |        | <b>1094.65</b> |         |         |        |
| T  | 1177.67       | 1205.66        |         |         |        | <b>981.56</b>  |         |         |        |
| A  | 1248.71       | 1276.70        |         |         |        | <b>880.51</b>  |         |         |        |
| Y  | 1411.77       | 1439.76        |         |         |        | <b>809.48</b>  |         |         |        |
| A  | 1482.81       | 1510.80        |         |         |        | <b>646.41</b>  |         |         |        |
| L  | 1595.89       | 1623.89        |         |         |        | <b>575.38</b>  |         |         |        |
| T  | 1696.94       | 1724.93        |         |         |        | <b>462.29</b>  |         |         |        |
| L  | 1810.02       | 1838.02        |         |         |        | <b>361.24</b>  |         |         |        |
| T  | 1911.07       | 1939.06        |         |         |        | <b>248.16</b>  |         |         |        |
| K  |               |                |         |         |        | 147.11         |         |         |        |



#19287468-1 NL: 5.80E4



DTA for scans: 2118291816-26226248  
Precursor ion: 543.82  
Mass type: mono  
Mod's: (M\* +15.99492) C=161.01468

Ion series for charge: +1

| AA | A ions        | B ions        | B* ions | Bo ions | C ions | Y ions        | Y* ions | Yo ions | Z ions |
|----|---------------|---------------|---------|---------|--------|---------------|---------|---------|--------|
| I  | 86.10         | 114.09        |         |         |        |               |         |         |        |
| T  | <b>187.14</b> | <b>215.14</b> |         |         |        | <b>973.55</b> |         |         |        |
| Q  | 315.20        | <b>343.20</b> |         |         |        | <b>872.50</b> |         |         |        |
| V  | <b>414.27</b> | <b>442.27</b> |         |         |        | <b>744.44</b> |         |         |        |
| L  | <b>527.36</b> | <b>555.35</b> |         |         |        | <b>645.37</b> |         |         |        |
| H  | <b>664.41</b> | <b>692.41</b> |         |         |        | <b>532.29</b> |         |         |        |
| F  | 811.48        | <b>839.48</b> |         |         |        | <b>395.23</b> |         |         |        |
| T  | 912.53        | <b>940.53</b> |         |         |        | <b>248.16</b> |         |         |        |
| K  |               |               |         |         |        | 147.11        |         |         |        |



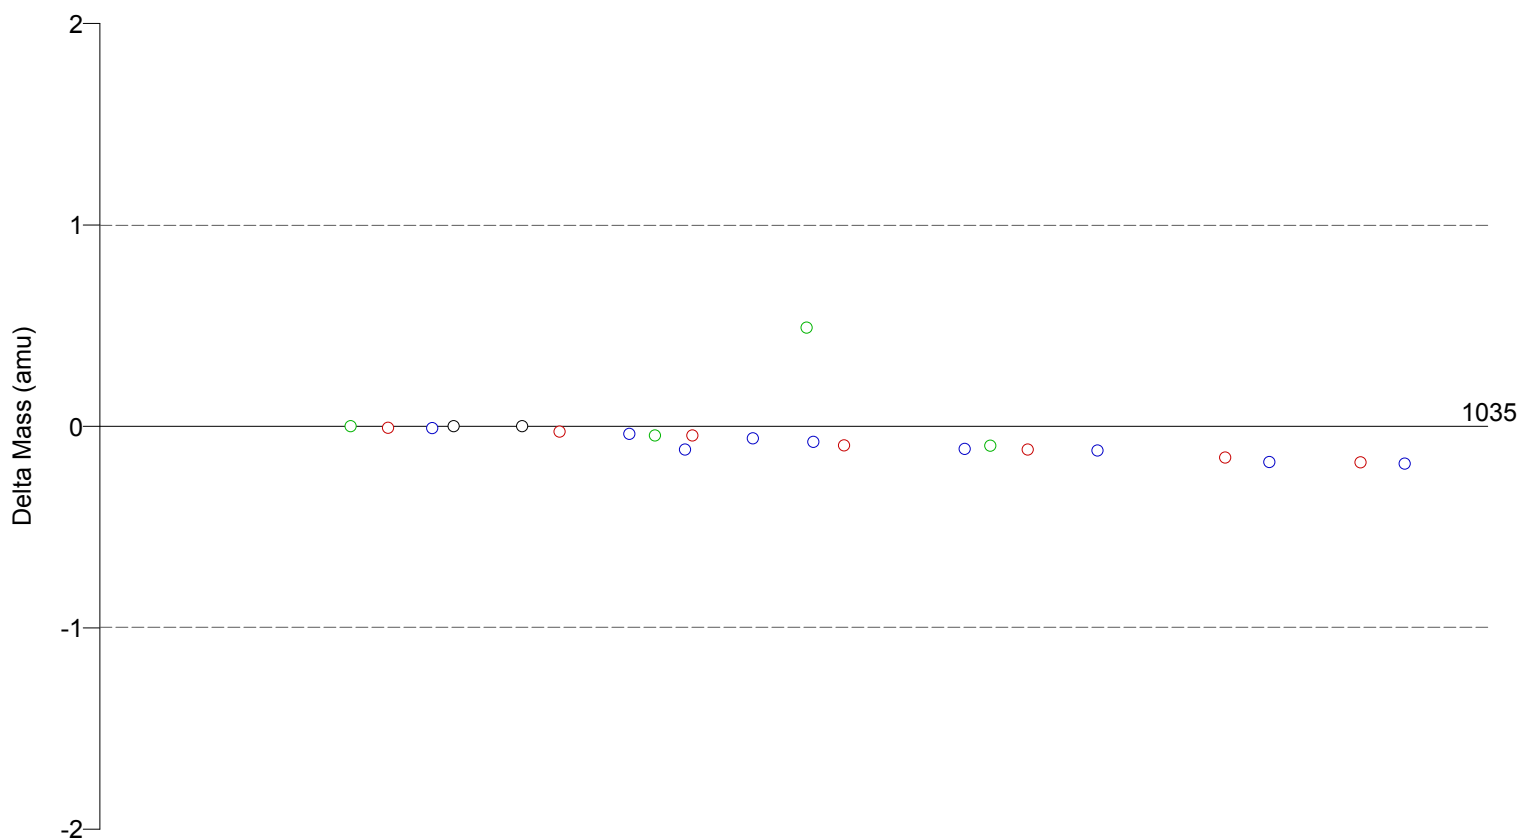

#2118291816-26226248 NL: 1.21E5



| Reference                          |                            |         |   | P      | Score | Coverage | Accession |     |        |       |
|------------------------------------|----------------------------|---------|---|--------|-------|----------|-----------|-----|--------|-------|
| Scan(s)                            | Sequence                   | MH+     | z | P      | XC    | DeltaCn  | Sp        | RSp | Ions   | Count |
| IPI:IPI00843913.3 TREMBL:BOV2C8;B2 |                            |         |   | 2e-005 | 20.2  | 0.0      |           | 0   |        |       |
| 19287468 - 1                       | K.ASAGLLGAHAAAITAYALTLTK.A | 2085.17 | 3 | 2e-005 | 3.435 | 0.549    | 736.3     | 1   | 26/126 | 8     |
| 2118291816 -                       | K.ITQVLHFTK.D              | 1086.63 | 2 | 0.0002 | 3.684 | 0.435    | 1215.2    | 1   | 18/24  | 10    |

2 of 2 peptide matches reported, 0 removed due to filtering

DTA for scans: 19287468-1  
Precursor ion: 695.73  
Mass type: mono  
Mod's: (M\* +15.99492) C=161.01468

Ion series for charge: +1

| AA | A ions        | B ions         | B* ions | Bo ions | C ions | Y ions         | Y* ions | Yo ions | Z ions |
|----|---------------|----------------|---------|---------|--------|----------------|---------|---------|--------|
| A  | 44.05         | 72.04          |         |         |        |                |         |         |        |
| S  | 131.08        | 159.08         |         |         |        | 2014.13        |         |         |        |
| A  | 202.12        | 230.11         |         |         |        | 1927.10        |         |         |        |
| G  | 259.14        | 287.13         |         |         |        | 1856.06        |         |         |        |
| L  | 372.22        | 400.22         |         |         |        | 1799.04        |         |         |        |
| L  | 485.31        | 513.30         |         |         |        | 1685.96        |         |         |        |
| G  | 542.33        | 570.32         |         |         |        | 1572.87        |         |         |        |
| A  | 613.37        | 641.36         |         |         |        | 1515.85        |         |         |        |
| H  | 750.43        | 778.42         |         |         |        | 1444.82        |         |         |        |
| A  | 821.46        | 849.46         |         |         |        | 1307.76        |         |         |        |
| A  | 892.50        | <b>920.49</b>  |         |         |        | 1236.72        |         |         |        |
| A  | <b>963.54</b> | <b>991.53</b>  |         |         |        | 1165.68        |         |         |        |
| I  | 1076.62       | <b>1104.62</b> |         |         |        | <b>1094.65</b> |         |         |        |
| T  | 1177.67       | 1205.66        |         |         |        | <b>981.56</b>  |         |         |        |
| A  | 1248.71       | 1276.70        |         |         |        | <b>880.51</b>  |         |         |        |
| Y  | 1411.77       | 1439.76        |         |         |        | <b>809.48</b>  |         |         |        |
| A  | 1482.81       | 1510.80        |         |         |        | <b>646.41</b>  |         |         |        |
| L  | 1595.89       | 1623.89        |         |         |        | <b>575.38</b>  |         |         |        |
| T  | 1696.94       | 1724.93        |         |         |        | <b>462.29</b>  |         |         |        |
| L  | 1810.02       | 1838.02        |         |         |        | <b>361.24</b>  |         |         |        |
| T  | 1911.07       | 1939.06        |         |         |        | <b>248.16</b>  |         |         |        |
| K  |               |                |         |         |        | 147.11         |         |         |        |



#19287468-1 NL: 5.80E4



DTA for scans: 2118291816-26226248  
Precursor ion: 543.82  
Mass type: mono  
Mod's: (M\* +15.99492) C=161.01468

Ion series for charge: +1

| AA | A ions        | B ions        | B* ions | Bo ions | C ions | Y ions        | Y* ions | Yo ions | Z ions |
|----|---------------|---------------|---------|---------|--------|---------------|---------|---------|--------|
| I  | 86.10         | 114.09        |         |         |        |               |         |         |        |
| T  | <b>187.14</b> | <b>215.14</b> |         |         |        | <b>973.55</b> |         |         |        |
| Q  | 315.20        | <b>343.20</b> |         |         |        | <b>872.50</b> |         |         |        |
| V  | <b>414.27</b> | <b>442.27</b> |         |         |        | <b>744.44</b> |         |         |        |
| L  | <b>527.36</b> | <b>555.35</b> |         |         |        | <b>645.37</b> |         |         |        |
| H  | <b>664.41</b> | <b>692.41</b> |         |         |        | <b>532.29</b> |         |         |        |
| F  | 811.48        | <b>839.48</b> |         |         |        | <b>395.23</b> |         |         |        |
| T  | 912.53        | <b>940.53</b> |         |         |        | <b>248.16</b> |         |         |        |
| K  |               |               |         |         |        | 147.11        |         |         |        |



#2118291816-26226248 NL: 1.21E5



| Reference                          |                            |         |   | P      | Score | Coverage | Accession |     |        |       |
|------------------------------------|----------------------------|---------|---|--------|-------|----------|-----------|-----|--------|-------|
| Scan(s)                            | Sequence                   | MH+     | z | P      | XC    | DeltaCn  | Sp        | RSp | Ions   | Count |
| IPI:IPI00887154.2 TREMBL:BOUZ85;Q6 |                            |         |   | 2e-005 | 20.2  | 0.0      |           | 0   |        |       |
| 19287468 - 1                       | K.ASAGLLGAHAAAITAYALTLTK.A | 2085.17 | 3 | 2e-005 | 3.435 | 0.549    | 736.3     | 1   | 26/126 | 8     |
| 2118291816 -                       | K.ITQVLHFTK.D              | 1086.63 | 2 | 0.0002 | 3.684 | 0.435    | 1215.2    | 1   | 18/24  | 10    |

2 of 2 peptide matches reported, 0 removed due to filtering

DTA for scans: 19287468-1  
Precursor ion: 695.73  
Mass type: mono  
Mod's: (M\* +15.99492) C=161.01468

Ion series for charge: +1

| AA | A ions        | B ions         | B* ions | Bo ions | C ions | Y ions         | Y* ions | Yo ions | Z ions |
|----|---------------|----------------|---------|---------|--------|----------------|---------|---------|--------|
| A  | 44.05         | 72.04          |         |         |        |                |         |         |        |
| S  | 131.08        | 159.08         |         |         |        | 2014.13        |         |         |        |
| A  | 202.12        | 230.11         |         |         |        | 1927.10        |         |         |        |
| G  | 259.14        | 287.13         |         |         |        | 1856.06        |         |         |        |
| L  | 372.22        | 400.22         |         |         |        | 1799.04        |         |         |        |
| L  | 485.31        | 513.30         |         |         |        | 1685.96        |         |         |        |
| G  | 542.33        | 570.32         |         |         |        | 1572.87        |         |         |        |
| A  | 613.37        | 641.36         |         |         |        | 1515.85        |         |         |        |
| H  | 750.43        | 778.42         |         |         |        | 1444.82        |         |         |        |
| A  | 821.46        | 849.46         |         |         |        | 1307.76        |         |         |        |
| A  | 892.50        | <b>920.49</b>  |         |         |        | 1236.72        |         |         |        |
| A  | <b>963.54</b> | <b>991.53</b>  |         |         |        | 1165.68        |         |         |        |
| I  | 1076.62       | <b>1104.62</b> |         |         |        | <b>1094.65</b> |         |         |        |
| T  | 1177.67       | 1205.66        |         |         |        | <b>981.56</b>  |         |         |        |
| A  | 1248.71       | 1276.70        |         |         |        | <b>880.51</b>  |         |         |        |
| Y  | 1411.77       | 1439.76        |         |         |        | <b>809.48</b>  |         |         |        |
| A  | 1482.81       | 1510.80        |         |         |        | <b>646.41</b>  |         |         |        |
| L  | 1595.89       | 1623.89        |         |         |        | <b>575.38</b>  |         |         |        |
| T  | 1696.94       | 1724.93        |         |         |        | <b>462.29</b>  |         |         |        |
| L  | 1810.02       | 1838.02        |         |         |        | <b>361.24</b>  |         |         |        |
| T  | 1911.07       | 1939.06        |         |         |        | <b>248.16</b>  |         |         |        |
| K  |               |                |         |         |        | 147.11         |         |         |        |





#19287468-1 NL: 5.80E4



DTA for scans: 2118291816-26226248  
Precursor ion: 543.82  
Mass type: mono  
Mod's: (M\* +15.99492) C=161.01468

Ion series for charge: +1

| AA | A ions        | B ions        | B* ions | Bo ions | C ions | Y ions        | Y* ions | Yo ions | Z ions |
|----|---------------|---------------|---------|---------|--------|---------------|---------|---------|--------|
| I  | 86.10         | 114.09        |         |         |        |               |         |         |        |
| T  | <b>187.14</b> | <b>215.14</b> |         |         |        | <b>973.55</b> |         |         |        |
| Q  | 315.20        | <b>343.20</b> |         |         |        | <b>872.50</b> |         |         |        |
| V  | <b>414.27</b> | <b>442.27</b> |         |         |        | <b>744.44</b> |         |         |        |
| L  | <b>527.36</b> | <b>555.35</b> |         |         |        | <b>645.37</b> |         |         |        |
| H  | <b>664.41</b> | <b>692.41</b> |         |         |        | <b>532.29</b> |         |         |        |
| F  | 811.48        | <b>839.48</b> |         |         |        | <b>395.23</b> |         |         |        |
| T  | 912.53        | <b>940.53</b> |         |         |        | <b>248.16</b> |         |         |        |
| K  |               |               |         |         |        | 147.11        |         |         |        |



#2118291816-26226248 NL: 1.21E5



| Reference                          |                            |         |   | P      | Score | Coverage | Accession |     |        |       |
|------------------------------------|----------------------------|---------|---|--------|-------|----------|-----------|-----|--------|-------|
| Scan(s)                            | Sequence                   | MH+     | z | P      | XC    | DeltaCn  | Sp        | RSp | Ions   | Count |
| IPI:IPI00889723.1 TREMBL:B0QZR6;B4 |                            |         |   | 2e-005 | 20.2  | 0.0      |           | 0   |        |       |
| 19287468 - 1                       | K.ASAGLLGAHAAAITAYALTLTK.A | 2085.17 | 3 | 2e-005 | 3.435 | 0.549    | 736.3     | 1   | 26/126 | 8     |
| 2118291816 -                       | K.ITQVLHFTK.D              | 1086.63 | 2 | 0.0002 | 3.684 | 0.435    | 1215.2    | 1   | 18/24  | 10    |

2 of 2 peptide matches reported, 0 removed due to filtering

DTA for scans: 19287468-1  
Precursor ion: 695.73  
Mass type: mono  
Mod's: (M\* +15.99492) C=161.01468

Ion series for charge: +1

| AA | A ions        | B ions         | B* ions | Bo ions | C ions | Y ions         | Y* ions | Yo ions | Z ions |
|----|---------------|----------------|---------|---------|--------|----------------|---------|---------|--------|
| A  | 44.05         | 72.04          |         |         |        |                |         |         |        |
| S  | 131.08        | 159.08         |         |         |        | 2014.13        |         |         |        |
| A  | 202.12        | 230.11         |         |         |        | 1927.10        |         |         |        |
| G  | 259.14        | 287.13         |         |         |        | 1856.06        |         |         |        |
| L  | 372.22        | 400.22         |         |         |        | 1799.04        |         |         |        |
| L  | 485.31        | 513.30         |         |         |        | 1685.96        |         |         |        |
| G  | 542.33        | 570.32         |         |         |        | 1572.87        |         |         |        |
| A  | 613.37        | 641.36         |         |         |        | 1515.85        |         |         |        |
| H  | 750.43        | 778.42         |         |         |        | 1444.82        |         |         |        |
| A  | 821.46        | 849.46         |         |         |        | 1307.76        |         |         |        |
| A  | 892.50        | <b>920.49</b>  |         |         |        | 1236.72        |         |         |        |
| A  | <b>963.54</b> | <b>991.53</b>  |         |         |        | 1165.68        |         |         |        |
| I  | 1076.62       | <b>1104.62</b> |         |         |        | <b>1094.65</b> |         |         |        |
| T  | 1177.67       | 1205.66        |         |         |        | <b>981.56</b>  |         |         |        |
| A  | 1248.71       | 1276.70        |         |         |        | <b>880.51</b>  |         |         |        |
| Y  | 1411.77       | 1439.76        |         |         |        | <b>809.48</b>  |         |         |        |
| A  | 1482.81       | 1510.80        |         |         |        | <b>646.41</b>  |         |         |        |
| L  | 1595.89       | 1623.89        |         |         |        | <b>575.38</b>  |         |         |        |
| T  | 1696.94       | 1724.93        |         |         |        | <b>462.29</b>  |         |         |        |
| L  | 1810.02       | 1838.02        |         |         |        | <b>361.24</b>  |         |         |        |
| T  | 1911.07       | 1939.06        |         |         |        | <b>248.16</b>  |         |         |        |
| K  |               |                |         |         |        | 147.11         |         |         |        |



#19287468-1 NL: 5.80E4



DTA for scans: 2118291816-26226248  
Precursor ion: 543.82  
Mass type: mono  
Mod's: (M\* +15.99492) C=161.01468

Ion series for charge: +1

| AA | A ions        | B ions        | B* ions | Bo ions | C ions | Y ions        | Y* ions | Yo ions | Z ions |
|----|---------------|---------------|---------|---------|--------|---------------|---------|---------|--------|
| I  | 86.10         | 114.09        |         |         |        |               |         |         |        |
| T  | <b>187.14</b> | <b>215.14</b> |         |         |        | <b>973.55</b> |         |         |        |
| Q  | 315.20        | <b>343.20</b> |         |         |        | <b>872.50</b> |         |         |        |
| V  | <b>414.27</b> | <b>442.27</b> |         |         |        | <b>744.44</b> |         |         |        |
| L  | <b>527.36</b> | <b>555.35</b> |         |         |        | <b>645.37</b> |         |         |        |
| H  | <b>664.41</b> | <b>692.41</b> |         |         |        | <b>532.29</b> |         |         |        |
| F  | 811.48        | <b>839.48</b> |         |         |        | <b>395.23</b> |         |         |        |
| T  | 912.53        | <b>940.53</b> |         |         |        | <b>248.16</b> |         |         |        |
| K  |               |               |         |         |        | 147.11        |         |         |        |



#2118291816-26226248 NL: 1.21E5





| Reference                          |                            |         |   | P      | Score | Coverage | Accession |     |        |       |
|------------------------------------|----------------------------|---------|---|--------|-------|----------|-----------|-----|--------|-------|
| Scan(s)                            | Sequence                   | MH+     | z | P      | XC    | DeltaCn  | Sp        | RSp | Ions   | Count |
| IPI:IPI00892547.1 TREMBL:BOUZ83 RE |                            |         |   | 2e-005 | 20.2  | 0.0      |           | 0   |        |       |
| 19287468 - 1                       | K.ASAGLLGAHAAAITAYALTLTK.A | 2085.17 | 3 | 2e-005 | 3.435 | 0.549    | 736.3     | 1   | 26/126 | 8     |
| 2118291816 -                       | K.ITQVLHFTK.D              | 1086.63 | 2 | 0.0002 | 3.684 | 0.435    | 1215.2    | 1   | 18/24  | 10    |

2 of 2 peptide matches reported, 0 removed due to filtering

DTA for scans: 19287468-1  
Precursor ion: 695.73  
Mass type: mono  
Mod's: (M\* +15.99492) C=161.01468

Ion series for charge: +1

| AA | A ions        | B ions         | B* ions | Bo ions | C ions | Y ions         | Y* ions | Yo ions | Z ions |
|----|---------------|----------------|---------|---------|--------|----------------|---------|---------|--------|
| A  | 44.05         | 72.04          |         |         |        |                |         |         |        |
| S  | 131.08        | 159.08         |         |         |        | 2014.13        |         |         |        |
| A  | 202.12        | 230.11         |         |         |        | 1927.10        |         |         |        |
| G  | 259.14        | 287.13         |         |         |        | 1856.06        |         |         |        |
| L  | 372.22        | 400.22         |         |         |        | 1799.04        |         |         |        |
| L  | 485.31        | 513.30         |         |         |        | 1685.96        |         |         |        |
| G  | 542.33        | 570.32         |         |         |        | 1572.87        |         |         |        |
| A  | 613.37        | 641.36         |         |         |        | 1515.85        |         |         |        |
| H  | 750.43        | 778.42         |         |         |        | 1444.82        |         |         |        |
| A  | 821.46        | 849.46         |         |         |        | 1307.76        |         |         |        |
| A  | 892.50        | <b>920.49</b>  |         |         |        | 1236.72        |         |         |        |
| A  | <b>963.54</b> | <b>991.53</b>  |         |         |        | 1165.68        |         |         |        |
| I  | 1076.62       | <b>1104.62</b> |         |         |        | <b>1094.65</b> |         |         |        |
| T  | 1177.67       | 1205.66        |         |         |        | <b>981.56</b>  |         |         |        |
| A  | 1248.71       | 1276.70        |         |         |        | <b>880.51</b>  |         |         |        |
| Y  | 1411.77       | 1439.76        |         |         |        | <b>809.48</b>  |         |         |        |
| A  | 1482.81       | 1510.80        |         |         |        | <b>646.41</b>  |         |         |        |
| L  | 1595.89       | 1623.89        |         |         |        | <b>575.38</b>  |         |         |        |
| T  | 1696.94       | 1724.93        |         |         |        | <b>462.29</b>  |         |         |        |
| L  | 1810.02       | 1838.02        |         |         |        | <b>361.24</b>  |         |         |        |
| T  | 1911.07       | 1939.06        |         |         |        | <b>248.16</b>  |         |         |        |
| K  |               |                |         |         |        | 147.11         |         |         |        |



#19287468-1 NL: 5.80E4



DTA for scans: 2118291816-26226248  
Precursor ion: 543.82  
Mass type: mono  
Mod's: (M\* +15.99492) C=161.01468

Ion series for charge: +1

| AA | A ions        | B ions        | B* ions | Bo ions | C ions | Y ions        | Y* ions | Yo ions | Z ions |
|----|---------------|---------------|---------|---------|--------|---------------|---------|---------|--------|
| I  | 86.10         | 114.09        |         |         |        |               |         |         |        |
| T  | <b>187.14</b> | <b>215.14</b> |         |         |        | <b>973.55</b> |         |         |        |
| Q  | 315.20        | <b>343.20</b> |         |         |        | <b>872.50</b> |         |         |        |
| V  | <b>414.27</b> | <b>442.27</b> |         |         |        | <b>744.44</b> |         |         |        |
| L  | <b>527.36</b> | <b>555.35</b> |         |         |        | <b>645.37</b> |         |         |        |
| H  | <b>664.41</b> | <b>692.41</b> |         |         |        | <b>532.29</b> |         |         |        |
| F  | 811.48        | <b>839.48</b> |         |         |        | <b>395.23</b> |         |         |        |
| T  | 912.53        | <b>940.53</b> |         |         |        | <b>248.16</b> |         |         |        |
| K  |               |               |         |         |        | 147.11        |         |         |        |



#2118291816-26226248 NL: 1.21E5



| Reference                          |                            |         |   | P      | Score | Coverage | Accession |     |        |       |
|------------------------------------|----------------------------|---------|---|--------|-------|----------|-----------|-----|--------|-------|
| Scan(s)                            | Sequence                   | MH+     | z | P      | XC    | DeltaCn  | Sp        | RSp | Ions   | Count |
| IPI:IPI00892604.1 TREMBL:A2BHY4;Q6 |                            |         |   | 2e-005 | 20.2  | 0.0      |           | 0   |        |       |
| 19287468 - 1                       | K.ASAGLLGAHAAAITAYALTLTK.A | 2085.17 | 3 | 2e-005 | 3.435 | 0.549    | 736.3     | 1   | 26/126 | 8     |
| 2118291816 -                       | K.ITQVLHFTK.D              | 1086.63 | 2 | 0.0002 | 3.684 | 0.435    | 1215.2    | 1   | 18/24  | 10    |

2 of 2 peptide matches reported, 0 removed due to filtering

DTA for scans: 19287468-1  
Precursor ion: 695.73  
Mass type: mono  
Mod's: (M\* +15.99492) C=161.01468

Ion series for charge: +1

| AA | A ions        | B ions         | B* ions | Bo ions | C ions | Y ions         | Y* ions | Yo ions | Z ions |
|----|---------------|----------------|---------|---------|--------|----------------|---------|---------|--------|
| A  | 44.05         | 72.04          |         |         |        |                |         |         |        |
| S  | 131.08        | 159.08         |         |         |        | 2014.13        |         |         |        |
| A  | 202.12        | 230.11         |         |         |        | 1927.10        |         |         |        |
| G  | 259.14        | 287.13         |         |         |        | 1856.06        |         |         |        |
| L  | 372.22        | 400.22         |         |         |        | 1799.04        |         |         |        |
| L  | 485.31        | 513.30         |         |         |        | 1685.96        |         |         |        |
| G  | 542.33        | 570.32         |         |         |        | 1572.87        |         |         |        |
| A  | 613.37        | 641.36         |         |         |        | 1515.85        |         |         |        |
| H  | 750.43        | 778.42         |         |         |        | 1444.82        |         |         |        |
| A  | 821.46        | 849.46         |         |         |        | 1307.76        |         |         |        |
| A  | 892.50        | <b>920.49</b>  |         |         |        | 1236.72        |         |         |        |
| A  | <b>963.54</b> | <b>991.53</b>  |         |         |        | 1165.68        |         |         |        |
| I  | 1076.62       | <b>1104.62</b> |         |         |        | <b>1094.65</b> |         |         |        |
| T  | 1177.67       | 1205.66        |         |         |        | <b>981.56</b>  |         |         |        |
| A  | 1248.71       | 1276.70        |         |         |        | <b>880.51</b>  |         |         |        |
| Y  | 1411.77       | 1439.76        |         |         |        | <b>809.48</b>  |         |         |        |
| A  | 1482.81       | 1510.80        |         |         |        | <b>646.41</b>  |         |         |        |
| L  | 1595.89       | 1623.89        |         |         |        | <b>575.38</b>  |         |         |        |
| T  | 1696.94       | 1724.93        |         |         |        | <b>462.29</b>  |         |         |        |
| L  | 1810.02       | 1838.02        |         |         |        | <b>361.24</b>  |         |         |        |
| T  | 1911.07       | 1939.06        |         |         |        | <b>248.16</b>  |         |         |        |
| K  |               |                |         |         |        | 147.11         |         |         |        |



#19287468-1 NL: 5.80E4





DTA for scans: 2118291816-26226248  
Precursor ion: 543.82  
Mass type: mono  
Mod's: (M\* +15.99492) C=161.01468

Ion series for charge: +1

| AA | A ions        | B ions        | B* ions | Bo ions | C ions | Y ions        | Y* ions | Yo ions | Z ions |
|----|---------------|---------------|---------|---------|--------|---------------|---------|---------|--------|
| I  | 86.10         | 114.09        |         |         |        |               |         |         |        |
| T  | <b>187.14</b> | <b>215.14</b> |         |         |        | <b>973.55</b> |         |         |        |
| Q  | 315.20        | <b>343.20</b> |         |         |        | <b>872.50</b> |         |         |        |
| V  | <b>414.27</b> | <b>442.27</b> |         |         |        | <b>744.44</b> |         |         |        |
| L  | <b>527.36</b> | <b>555.35</b> |         |         |        | <b>645.37</b> |         |         |        |
| H  | <b>664.41</b> | <b>692.41</b> |         |         |        | <b>532.29</b> |         |         |        |
| F  | 811.48        | <b>839.48</b> |         |         |        | <b>395.23</b> |         |         |        |
| T  | 912.53        | <b>940.53</b> |         |         |        | <b>248.16</b> |         |         |        |
| K  |               |               |         |         |        | 147.11        |         |         |        |



#2118291816-26226248 NL: 1.21E5



---

| Reference                          |                            |         |   | P      | Score | Coverage | Accession |     |        |       |
|------------------------------------|----------------------------|---------|---|--------|-------|----------|-----------|-----|--------|-------|
| Scan(s)                            | Sequence                   | MH+     | z | P      | XC    | DeltaCn  | Sp        | RSp | Ions   | Count |
| IPI:IPI00937598.1 TREMBL:A6H8M8 RE |                            |         |   | 2e-005 | 20.2  | 0.0      |           | 0   |        |       |
| 19287468 - 1                       | K.ASAGLLGAHAAAITAYALTLTK.A | 2085.17 | 3 | 2e-005 | 3.435 | 0.549    | 736.3     | 1   | 26/126 | 8     |
| 2118291816 -                       | K.ITQVLHFTK.D              | 1086.63 | 2 | 0.0002 | 3.684 | 0.435    | 1215.2    | 1   | 18/24  | 10    |

2 of 2 peptide matches reported, 0 removed due to filtering

DTA for scans: 19287468-1  
Precursor ion: 695.73  
Mass type: mono  
Mod's: (M\* +15.99492) C=161.01468

Ion series for charge: +1

| AA | A ions        | B ions         | B* ions | Bo ions | C ions | Y ions         | Y* ions | Yo ions | Z ions |
|----|---------------|----------------|---------|---------|--------|----------------|---------|---------|--------|
| A  | 44.05         | 72.04          |         |         |        |                |         |         |        |
| S  | 131.08        | 159.08         |         |         |        | 2014.13        |         |         |        |
| A  | 202.12        | 230.11         |         |         |        | 1927.10        |         |         |        |
| G  | 259.14        | 287.13         |         |         |        | 1856.06        |         |         |        |
| L  | 372.22        | 400.22         |         |         |        | 1799.04        |         |         |        |
| L  | 485.31        | 513.30         |         |         |        | 1685.96        |         |         |        |
| G  | 542.33        | 570.32         |         |         |        | 1572.87        |         |         |        |
| A  | 613.37        | 641.36         |         |         |        | 1515.85        |         |         |        |
| H  | 750.43        | 778.42         |         |         |        | 1444.82        |         |         |        |
| A  | 821.46        | 849.46         |         |         |        | 1307.76        |         |         |        |
| A  | 892.50        | <b>920.49</b>  |         |         |        | 1236.72        |         |         |        |
| A  | <b>963.54</b> | <b>991.53</b>  |         |         |        | 1165.68        |         |         |        |
| I  | 1076.62       | <b>1104.62</b> |         |         |        | <b>1094.65</b> |         |         |        |
| T  | 1177.67       | 1205.66        |         |         |        | <b>981.56</b>  |         |         |        |
| A  | 1248.71       | 1276.70        |         |         |        | <b>880.51</b>  |         |         |        |
| Y  | 1411.77       | 1439.76        |         |         |        | <b>809.48</b>  |         |         |        |
| A  | 1482.81       | 1510.80        |         |         |        | <b>646.41</b>  |         |         |        |
| L  | 1595.89       | 1623.89        |         |         |        | <b>575.38</b>  |         |         |        |
| T  | 1696.94       | 1724.93        |         |         |        | <b>462.29</b>  |         |         |        |
| L  | 1810.02       | 1838.02        |         |         |        | <b>361.24</b>  |         |         |        |
| T  | 1911.07       | 1939.06        |         |         |        | <b>248.16</b>  |         |         |        |
| K  |               |                |         |         |        | 147.11         |         |         |        |



#19287468-1 NL: 5.80E4



DTA for scans: 2118291816-26226248  
Precursor ion: 543.82  
Mass type: mono  
Mod's: (M\* +15.99492) C=161.01468

Ion series for charge: +1

| AA | A ions        | B ions        | B* ions | Bo ions | C ions | Y ions        | Y* ions | Yo ions | Z ions |
|----|---------------|---------------|---------|---------|--------|---------------|---------|---------|--------|
| I  | 86.10         | 114.09        |         |         |        |               |         |         |        |
| T  | <b>187.14</b> | <b>215.14</b> |         |         |        | <b>973.55</b> |         |         |        |
| Q  | 315.20        | <b>343.20</b> |         |         |        | <b>872.50</b> |         |         |        |
| V  | <b>414.27</b> | <b>442.27</b> |         |         |        | <b>744.44</b> |         |         |        |
| L  | <b>527.36</b> | <b>555.35</b> |         |         |        | <b>645.37</b> |         |         |        |
| H  | <b>664.41</b> | <b>692.41</b> |         |         |        | <b>532.29</b> |         |         |        |
| F  | 811.48        | <b>839.48</b> |         |         |        | <b>395.23</b> |         |         |        |
| T  | 912.53        | <b>940.53</b> |         |         |        | <b>248.16</b> |         |         |        |
| K  |               |               |         |         |        | 147.11        |         |         |        |



#2118291816-26226248 NL: 1.21E5



---

| Reference                          |                            |         |   | P      | Score | Coverage | Accession |     |        |       |
|------------------------------------|----------------------------|---------|---|--------|-------|----------|-----------|-----|--------|-------|
| Scan(s)                            | Sequence                   | MH+     | z | P      | XC    | DeltaCn  | Sp        | RSp | Ions   | Count |
| IPI:IPI00922744.1 TREMBL:Q9UNU2 Ta |                            |         |   | 2e-005 | 10.2  | 0.0      | 0         |     |        |       |
| 19287468 - 1                       | K.ASAGLLGAHAAAITAYALTLTK.A | 2085.17 | 3 | 2e-005 | 3.435 | 0.549    | 736.3     | 1   | 26/126 | 8     |

1 of 1 peptide matches reported, 0 removed due to filtering



DTA for scans: 19287468-1  
Precursor ion: 695.73  
Mass type: mono  
Mod's: (M\* +15.99492) C=161.01468

Ion series for charge: +1

| AA | A ions        | B ions         | B* ions | Bo ions | C ions | Y ions         | Y* ions | Yo ions | Z ions |
|----|---------------|----------------|---------|---------|--------|----------------|---------|---------|--------|
| A  | 44.05         | 72.04          |         |         |        |                |         |         |        |
| S  | 131.08        | 159.08         |         |         |        | 2014.13        |         |         |        |
| A  | 202.12        | 230.11         |         |         |        | 1927.10        |         |         |        |
| G  | 259.14        | 287.13         |         |         |        | 1856.06        |         |         |        |
| L  | 372.22        | 400.22         |         |         |        | 1799.04        |         |         |        |
| L  | 485.31        | 513.30         |         |         |        | 1685.96        |         |         |        |
| G  | 542.33        | 570.32         |         |         |        | 1572.87        |         |         |        |
| A  | 613.37        | 641.36         |         |         |        | 1515.85        |         |         |        |
| H  | 750.43        | 778.42         |         |         |        | 1444.82        |         |         |        |
| A  | 821.46        | 849.46         |         |         |        | 1307.76        |         |         |        |
| A  | 892.50        | <b>920.49</b>  |         |         |        | 1236.72        |         |         |        |
| A  | <b>963.54</b> | <b>991.53</b>  |         |         |        | 1165.68        |         |         |        |
| I  | 1076.62       | <b>1104.62</b> |         |         |        | <b>1094.65</b> |         |         |        |
| T  | 1177.67       | 1205.66        |         |         |        | <b>981.56</b>  |         |         |        |
| A  | 1248.71       | 1276.70        |         |         |        | <b>880.51</b>  |         |         |        |
| Y  | 1411.77       | 1439.76        |         |         |        | <b>809.48</b>  |         |         |        |
| A  | 1482.81       | 1510.80        |         |         |        | <b>646.41</b>  |         |         |        |
| L  | 1595.89       | 1623.89        |         |         |        | <b>575.38</b>  |         |         |        |
| T  | 1696.94       | 1724.93        |         |         |        | <b>462.29</b>  |         |         |        |
| L  | 1810.02       | 1838.02        |         |         |        | <b>361.24</b>  |         |         |        |
| T  | 1911.07       | 1939.06        |         |         |        | <b>248.16</b>  |         |         |        |
| K  |               |                |         |         |        | 147.11         |         |         |        |



#19287468-1 NL: 5.80E4



---

| Reference                          |                   |         |   | P      | Score | Coverage | Accession |     |       |       |
|------------------------------------|-------------------|---------|---|--------|-------|----------|-----------|-----|-------|-------|
| Scan(s)                            | Sequence          | MH+     | z | P      | XC    | DeltaCn  | Sp        | RSp | Ions  | Count |
| IPI:IPI00793108.1 VEGA:OTTHUMP0000 |                   |         |   | 3e-005 | 10.2  | 0.0      | 0         |     |       |       |
| 2118291816 -                       | K.VNKDDEEFIESNK.M | 1566.73 | 3 | 3e-005 | 3.718 | 0.554    | 800.2     | 1   | 25/72 | 2     |

1 of 1 peptide matches reported, 0 removed due to filtering

DTA for scans: 2118291816-26226248  
Precursor ion: 522.91  
Mass type: mono  
Mod's: (M\* +15.99492) C=161.01468

Ion series for charge: +1

| AA | A ions        | B ions        | B* ions | Bo ions | C ions | Y ions        | Y* ions | Yo ions | Z ions |
|----|---------------|---------------|---------|---------|--------|---------------|---------|---------|--------|
| V  | 72.08         | 100.08        |         |         |        |               |         |         |        |
| N  | 186.12        | <b>214.12</b> |         |         |        | 1467.66       |         |         |        |
| K  | <b>314.22</b> | <b>342.21</b> |         |         |        | 1353.62       |         |         |        |
| D  | 429.25        | 457.24        |         |         |        | 1225.52       |         |         |        |
| D  | 544.27        | <b>572.27</b> |         |         |        | 1110.49       |         |         |        |
| E  | 673.32        | <b>701.31</b> |         |         |        | 995.47        |         |         |        |
| E  | 802.36        | <b>830.35</b> |         |         |        | <b>866.43</b> |         |         |        |
| F  | 949.43        | <b>977.42</b> |         |         |        | <b>737.38</b> |         |         |        |
| I  | 1062.51       | 1090.51       |         |         |        | <b>590.31</b> |         |         |        |
| E  | 1191.55       | 1219.55       |         |         |        | <b>477.23</b> |         |         |        |
| S  | 1278.58       | 1306.58       |         |         |        | <b>348.19</b> |         |         |        |
| N  | 1392.63       | 1420.62       |         |         |        | <b>261.16</b> |         |         |        |
| K  |               |               |         |         |        | 147.11        |         |         |        |

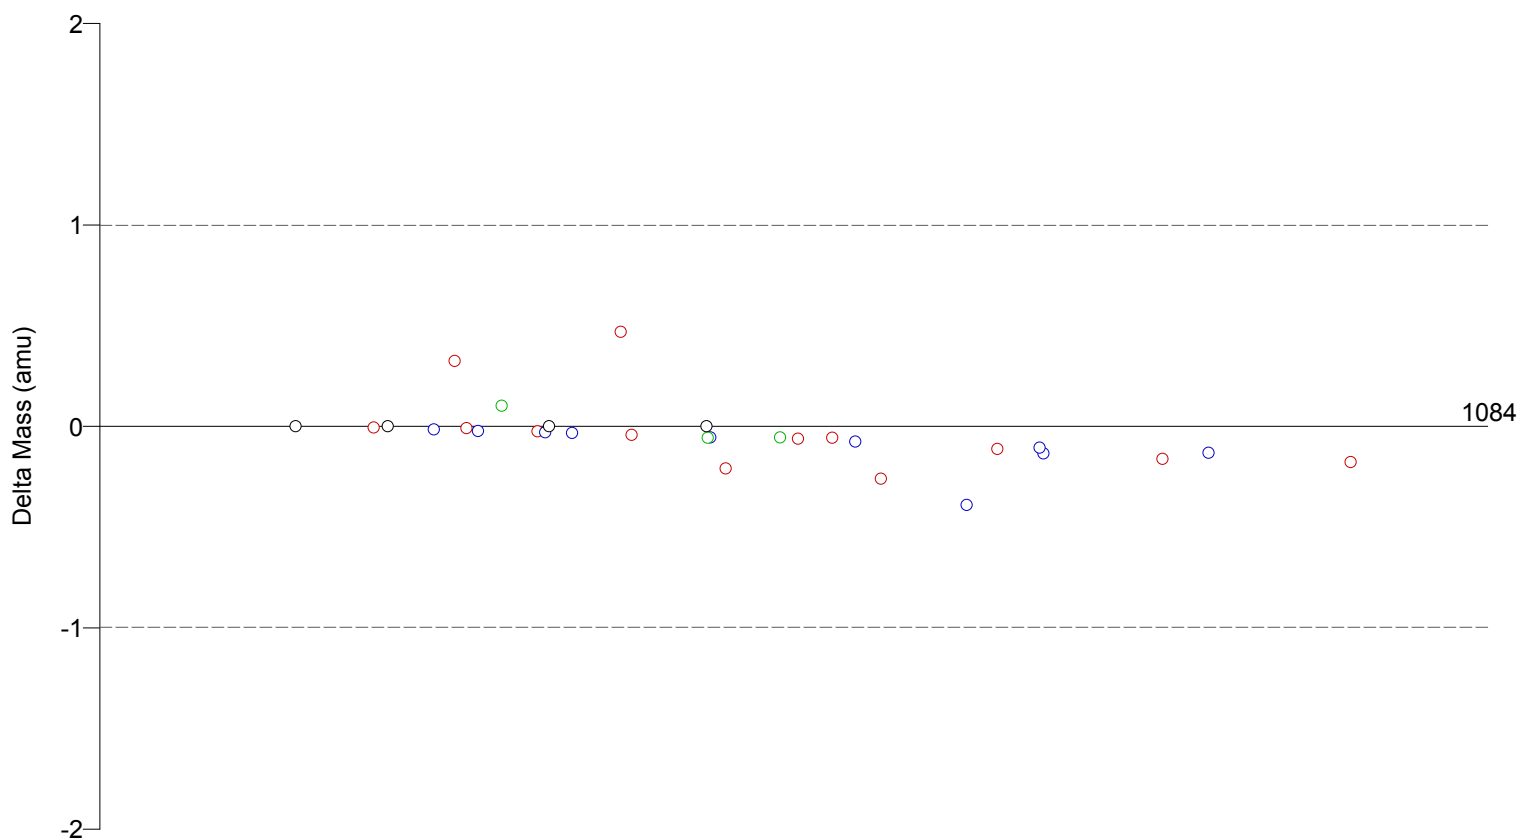

#2118291816-26226248 NL: 8.32E4



---

| Reference                          |          |         |   | P      | Score | Coverage | Accession |     |       |       |
|------------------------------------|----------|---------|---|--------|-------|----------|-----------|-----|-------|-------|
| Scan(s)                            | Sequence | MH+     | z | P      | XC    | DeltaCn  | Sp        | RSp | Ions  | Count |
| IPI:IPI00794184.1 TREMBL:B3KTA8 VE |          |         |   | 3e-005 | 10.2  | 0.0      | 0         |     |       |       |
| 2118291816 - K.VNKDDEEFIESNK.M     |          | 1566.73 | 3 | 3e-005 | 3.718 | 0.554    | 800.2     | 1   | 25/72 | 2     |

1 of 1 peptide matches reported, 0 removed due to filtering

DTA for scans: 2118291816-26226248  
Precursor ion: 522.91  
Mass type: mono  
Mod's: (M\* +15.99492) C=161.01468

Ion series for charge: +1

| AA | A ions        | B ions        | B* ions | Bo ions | C ions | Y ions        | Y* ions | Yo ions | Z ions |
|----|---------------|---------------|---------|---------|--------|---------------|---------|---------|--------|
| V  | 72.08         | 100.08        |         |         |        |               |         |         |        |
| N  | 186.12        | <b>214.12</b> |         |         |        | 1467.66       |         |         |        |
| K  | <b>314.22</b> | <b>342.21</b> |         |         |        | 1353.62       |         |         |        |
| D  | 429.25        | 457.24        |         |         |        | 1225.52       |         |         |        |
| D  | 544.27        | <b>572.27</b> |         |         |        | 1110.49       |         |         |        |
| E  | 673.32        | <b>701.31</b> |         |         |        | 995.47        |         |         |        |
| E  | 802.36        | <b>830.35</b> |         |         |        | <b>866.43</b> |         |         |        |
| F  | 949.43        | <b>977.42</b> |         |         |        | <b>737.38</b> |         |         |        |
| I  | 1062.51       | 1090.51       |         |         |        | <b>590.31</b> |         |         |        |
| E  | 1191.55       | 1219.55       |         |         |        | <b>477.23</b> |         |         |        |
| S  | 1278.58       | 1306.58       |         |         |        | <b>348.19</b> |         |         |        |
| N  | 1392.63       | 1420.62       |         |         |        | <b>261.16</b> |         |         |        |
| K  |               |               |         |         |        | 147.11        |         |         |        |

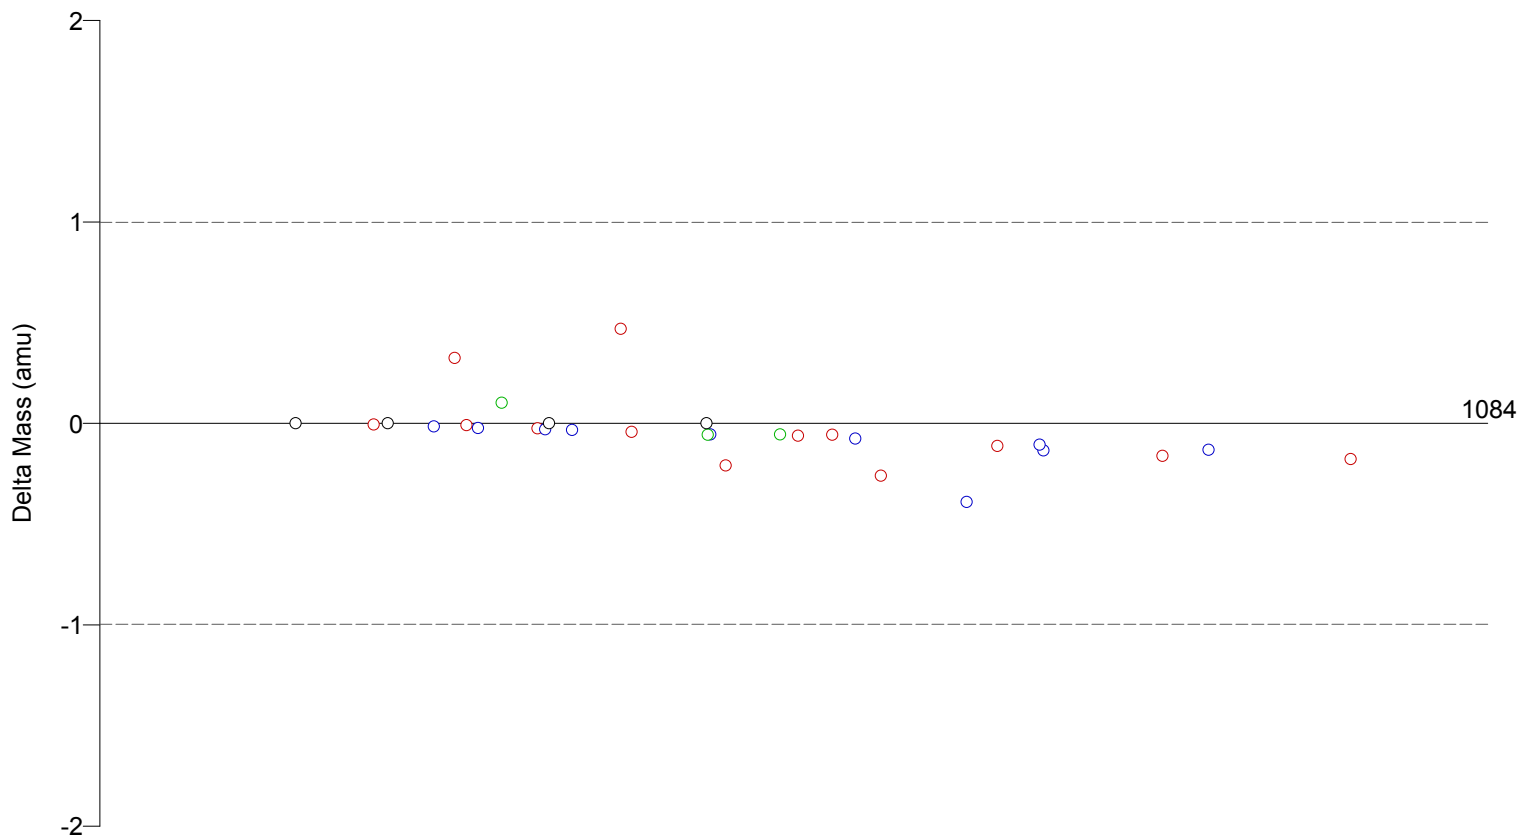

#2118291816-26226248 NL: 8.32E4





---

| Reference                                                      |                 |         |   | P      | Score | Coverage | Accession |     |       |       |  |
|----------------------------------------------------------------|-----------------|---------|---|--------|-------|----------|-----------|-----|-------|-------|--|
| Scan(s)                                                        | Sequence        | MH+     | z | P      | XC    | DeltaCn  | Sp        | RSp | Ions  | Count |  |
| IPI:IPI00021857.1 SWISS-PROT:P02656 TREMBL:A3KPE2 ENSEMBL:ENSP |                 |         |   | 4e-005 | 10.2  | 0.0      | 0         |     |       |       |  |
| 19287468 - 1                                                   | R.GWVTDGFSSLK.D | 1196.59 | 2 | 4e-005 | 3.932 | 0.552    | 725.3     | 1   | 17/30 | 1     |  |

1 of 1 peptide matches reported, 0 removed due to filtering

DTA for scans: 19287468-1  
Precursor ion: 598.80  
Mass type: mono  
Mod's: (M\* +15.99492) C=161.01468

Ion series for charge: +1

| AA | A ions        | B ions         | B* ions | Bo ions | C ions | Y ions        | Y* ions | Yo ions | Z ions |
|----|---------------|----------------|---------|---------|--------|---------------|---------|---------|--------|
| G  | 30.03         | 58.03          |         |         |        |               |         |         |        |
| W  | <b>216.11</b> | <b>244.11</b>  |         |         |        | 1139.57       |         |         |        |
| V  | 315.18        | <b>343.18</b>  |         |         |        | <b>953.49</b> |         |         |        |
| T  | <b>416.23</b> | <b>444.22</b>  |         |         |        | <b>854.43</b> |         |         |        |
| D  | 531.26        | <b>559.25</b>  |         |         |        | <b>753.38</b> |         |         |        |
| G  | 588.28        | 616.27         |         |         |        | <b>638.35</b> |         |         |        |
| F  | 735.35        | <b>763.34</b>  |         |         |        | <b>581.33</b> |         |         |        |
| S  | 822.38        | <b>850.37</b>  |         |         |        | <b>434.26</b> |         |         |        |
| S  | 909.41        | 937.41         |         |         |        | <b>347.23</b> |         |         |        |
| L  | 1022.49       | <b>1050.49</b> |         |         |        | <b>260.20</b> |         |         |        |
| K  |               |                |         |         |        | 147.11        |         |         |        |

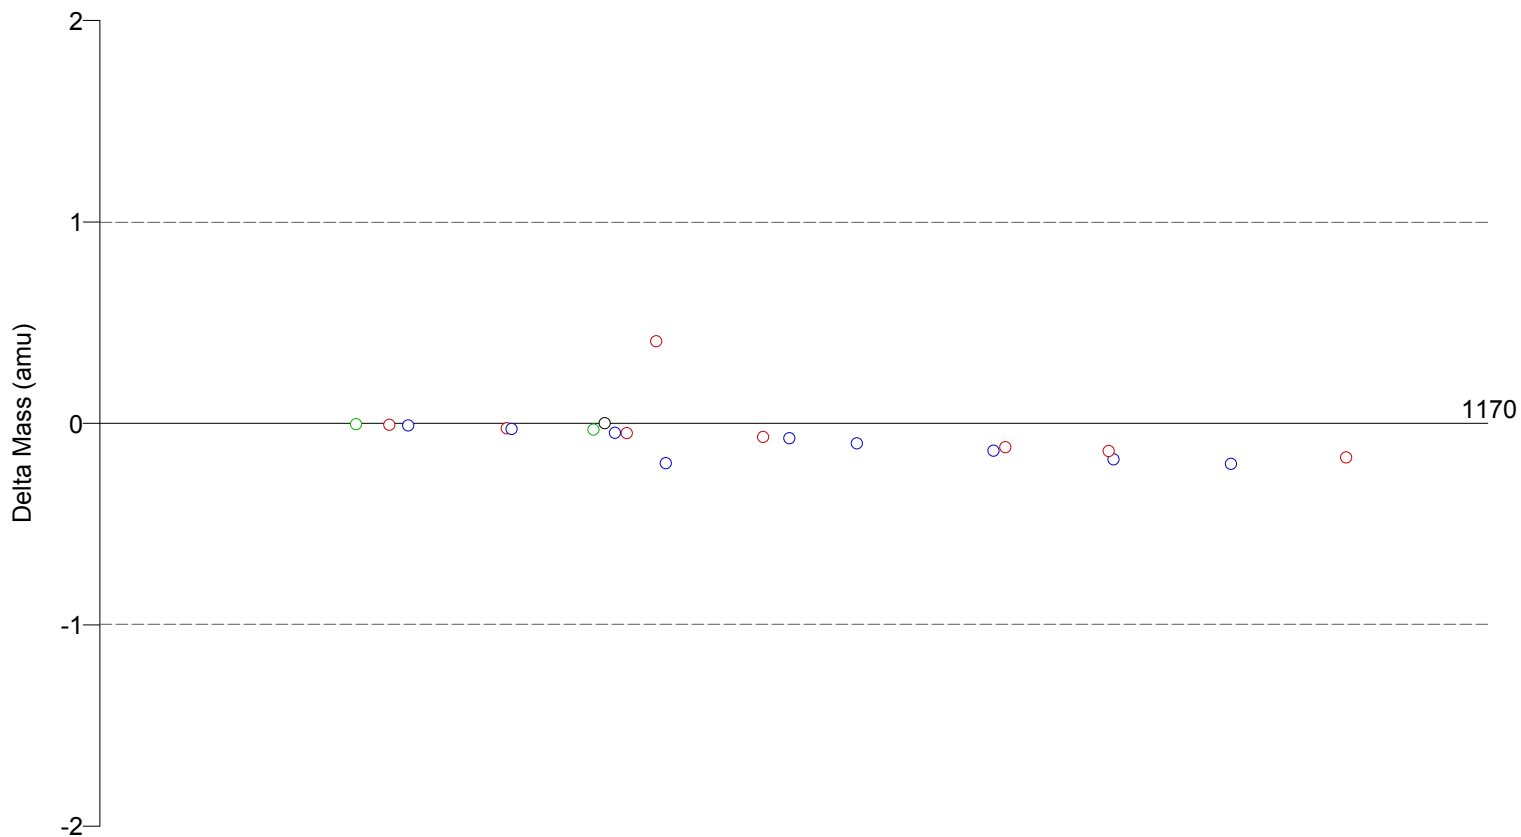

#19287468-1 NL: 9.45E4

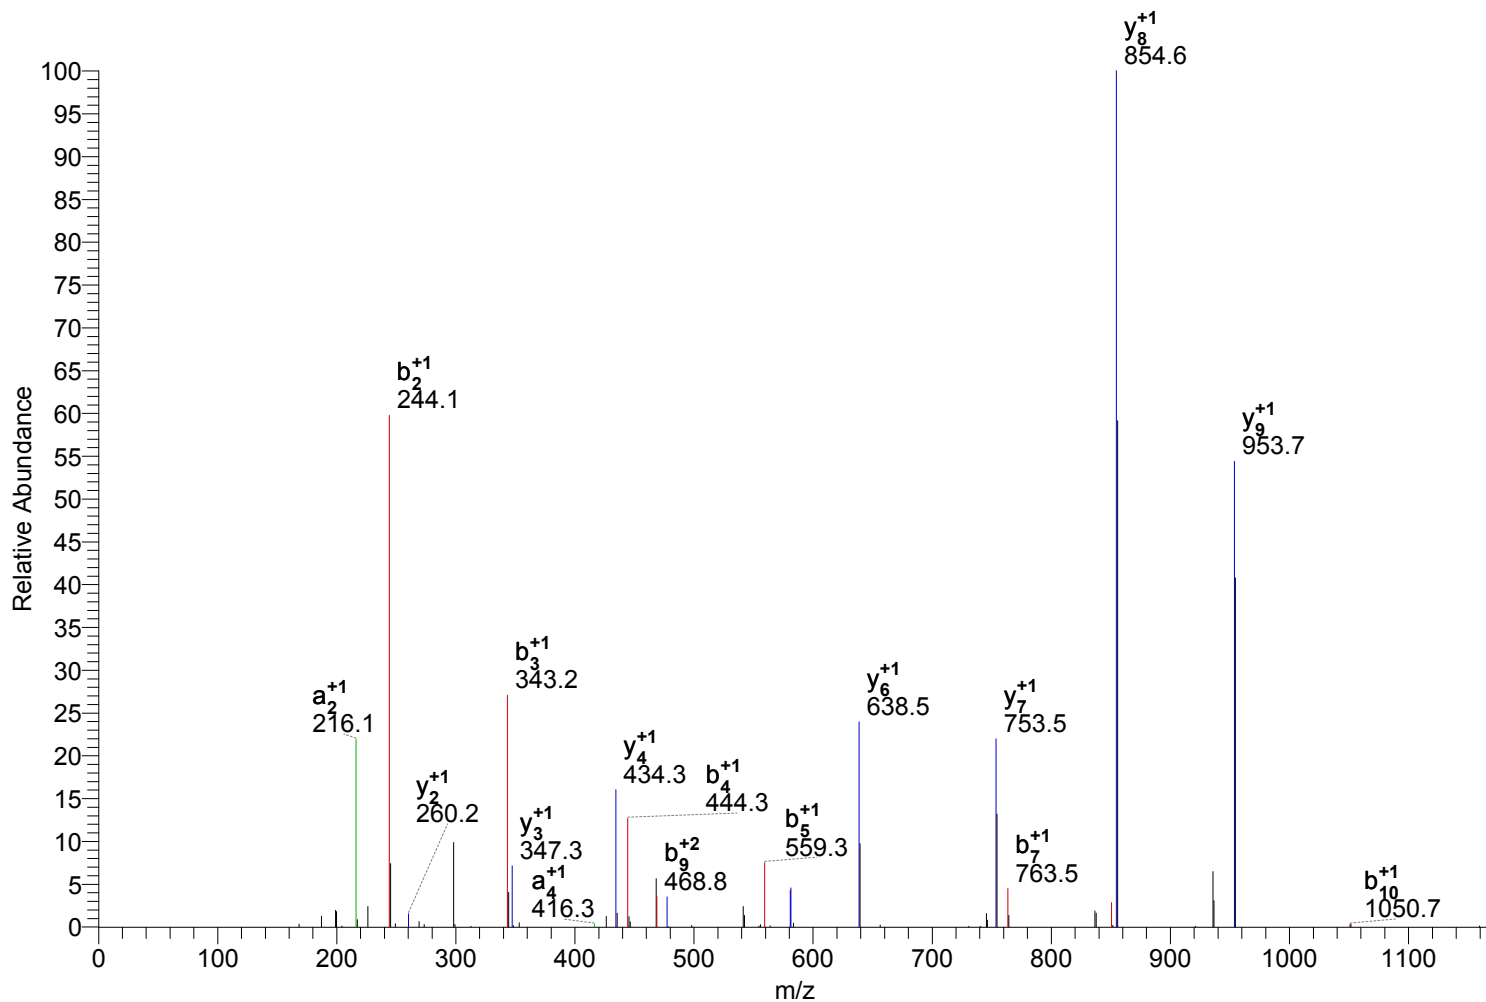

---

| Reference                          |                 |         |   | P      | Score | Coverage | Accession |     |       |       |
|------------------------------------|-----------------|---------|---|--------|-------|----------|-----------|-----|-------|-------|
| Scan(s)                            | Sequence        | MH+     | z | P      | XC    | DeltaCn  | Sp        | RSp | Ions  | Count |
| IPI:IPI00657670.1 TREMBL:BOYIW2 EN |                 |         |   | 4e-005 | 10.2  | 0.0      | 0         |     |       |       |
| 19287468 - 1                       | R.GWVTDGFSSLK.D | 1196.59 | 2 | 4e-005 | 3.932 | 0.552    | 725.3     | 1   | 17/30 | 1     |

1 of 1 peptide matches reported, 0 removed due to filtering

DTA for scans: 19287468-1  
Precursor ion: 598.80  
Mass type: mono  
Mod's: (M\* +15.99492) C=161.01468

Ion series for charge: +1

| AA | A ions        | B ions         | B* ions | Bo ions | C ions | Y ions        | Y* ions | Yo ions | Z ions |
|----|---------------|----------------|---------|---------|--------|---------------|---------|---------|--------|
| G  | 30.03         | 58.03          |         |         |        |               |         |         |        |
| W  | <b>216.11</b> | <b>244.11</b>  |         |         |        | 1139.57       |         |         |        |
| V  | 315.18        | <b>343.18</b>  |         |         |        | <b>953.49</b> |         |         |        |
| T  | <b>416.23</b> | <b>444.22</b>  |         |         |        | <b>854.43</b> |         |         |        |
| D  | 531.26        | <b>559.25</b>  |         |         |        | <b>753.38</b> |         |         |        |
| G  | 588.28        | 616.27         |         |         |        | <b>638.35</b> |         |         |        |
| F  | 735.35        | <b>763.34</b>  |         |         |        | <b>581.33</b> |         |         |        |
| S  | 822.38        | <b>850.37</b>  |         |         |        | <b>434.26</b> |         |         |        |
| S  | 909.41        | 937.41         |         |         |        | <b>347.23</b> |         |         |        |
| L  | 1022.49       | <b>1050.49</b> |         |         |        | <b>260.20</b> |         |         |        |
| K  |               |                |         |         |        | 147.11        |         |         |        |



#19287468-1 NL: 9.45E4



---

| Reference                                                      |                     |         |   | P      | Score | Coverage | Accession |     |       |       |
|----------------------------------------------------------------|---------------------|---------|---|--------|-------|----------|-----------|-----|-------|-------|
| Scan(s)                                                        | Sequence            | MH+     | z | P      | XC    | DeltaCn  | Sp        | RSp | Ions  | Count |
| IPI:IPI00550731.2 SWISS-PROT:P06310 TREMBL:Q8TCD0 ENSEMBL:ENSP |                     |         |   | 5e-005 | 10.2  | 0.0      | 0         |     |       |       |
| 19287468 - 1                                                   | K.SGTASVCLLNFFYPR.E | 1798.88 | 2 | 5e-005 | 3.485 | 0.433    | 766.8     | 1   | 17/45 | 7     |

1 of 1 peptide matches reported, 0 removed due to filtering

DTA for scans: 19287468-1  
Precursor ion: 899.94  
Mass type: mono  
Mod's: (M\* +15.99492) C=161.01468

Ion series for charge: +1

| AA | A ions  | B ions         | B* ions | Bo ions | C ions | Y ions         | Y* ions | Yo ions | Z ions |
|----|---------|----------------|---------|---------|--------|----------------|---------|---------|--------|
| S  | 60.04   | 88.04          |         |         |        |                |         |         |        |
| G  | 117.07  | 145.06         |         |         |        | 1711.85        |         |         |        |
| T  | 218.11  | 246.11         |         |         |        | 1654.83        |         |         |        |
| A  | 289.15  | 317.15         |         |         |        | 1553.78        |         |         |        |
| S  | 376.18  | 404.18         |         |         |        | 1482.74        |         |         |        |
| V  | 475.25  | <b>503.25</b>  |         |         |        | 1395.71        |         |         |        |
| V  | 574.32  | <b>602.31</b>  |         |         |        | <b>1296.64</b> |         |         |        |
| C  | 735.33  | 763.33         |         |         |        | <b>1197.57</b> |         |         |        |
| L  | 848.42  | <b>876.41</b>  |         |         |        | <b>1036.56</b> |         |         |        |
| L  | 961.50  | <b>989.50</b>  |         |         |        | <b>923.47</b>  |         |         |        |
| N  | 1075.55 | <b>1103.54</b> |         |         |        | <b>810.39</b>  |         |         |        |
| N  | 1189.59 | <b>1217.58</b> |         |         |        | <b>696.35</b>  |         |         |        |
| F  | 1336.66 | <b>1364.65</b> |         |         |        | <b>582.30</b>  |         |         |        |
| Y  | 1499.72 | <b>1527.71</b> |         |         |        | <b>435.24</b>  |         |         |        |
| P  | 1596.77 | 1624.77        |         |         |        | <b>272.17</b>  |         |         |        |
| R  |         |                |         |         |        | 175.12         |         |         |        |





#19287468-1 NL: 2.53E6



---

| Reference                          |                     |         |   | P      | Score | Coverage | Accession |     |       |       |
|------------------------------------|---------------------|---------|---|--------|-------|----------|-----------|-----|-------|-------|
| Scan(s)                            | Sequence            | MH+     | z | P      | XC    | DeltaCn  | Sp        | RSp | Ions  | Count |
| IPI:IPI00556287.1 TREMBL:Q569I7 Ta |                     |         |   | 5e-005 | 10.2  | 0.0      | 0         |     |       |       |
| 19287468 - 1                       | K.SGTASVCLLNIFYPR.E | 1798.88 | 2 | 5e-005 | 3.485 | 0.433    | 766.8     | 1   | 17/45 | 7     |

1 of 1 peptide matches reported, 0 removed due to filtering

DTA for scans: 19287468-1  
Precursor ion: 899.94  
Mass type: mono  
Mod's: (M\* +15.99492) C=161.01468

Ion series for charge: +1

| AA | A ions  | B ions         | B* ions | Bo ions | C ions | Y ions         | Y* ions | Yo ions | Z ions |
|----|---------|----------------|---------|---------|--------|----------------|---------|---------|--------|
| S  | 60.04   | 88.04          |         |         |        |                |         |         |        |
| G  | 117.07  | 145.06         |         |         |        | 1711.85        |         |         |        |
| T  | 218.11  | 246.11         |         |         |        | 1654.83        |         |         |        |
| A  | 289.15  | 317.15         |         |         |        | 1553.78        |         |         |        |
| S  | 376.18  | 404.18         |         |         |        | 1482.74        |         |         |        |
| V  | 475.25  | <b>503.25</b>  |         |         |        | 1395.71        |         |         |        |
| V  | 574.32  | <b>602.31</b>  |         |         |        | <b>1296.64</b> |         |         |        |
| C  | 735.33  | 763.33         |         |         |        | <b>1197.57</b> |         |         |        |
| L  | 848.42  | <b>876.41</b>  |         |         |        | <b>1036.56</b> |         |         |        |
| L  | 961.50  | <b>989.50</b>  |         |         |        | <b>923.47</b>  |         |         |        |
| N  | 1075.55 | <b>1103.54</b> |         |         |        | <b>810.39</b>  |         |         |        |
| N  | 1189.59 | <b>1217.58</b> |         |         |        | <b>696.35</b>  |         |         |        |
| F  | 1336.66 | <b>1364.65</b> |         |         |        | <b>582.30</b>  |         |         |        |
| Y  | 1499.72 | <b>1527.71</b> |         |         |        | <b>435.24</b>  |         |         |        |
| P  | 1596.77 | 1624.77        |         |         |        | <b>272.17</b>  |         |         |        |
| R  |         |                |         |         |        | 175.12         |         |         |        |

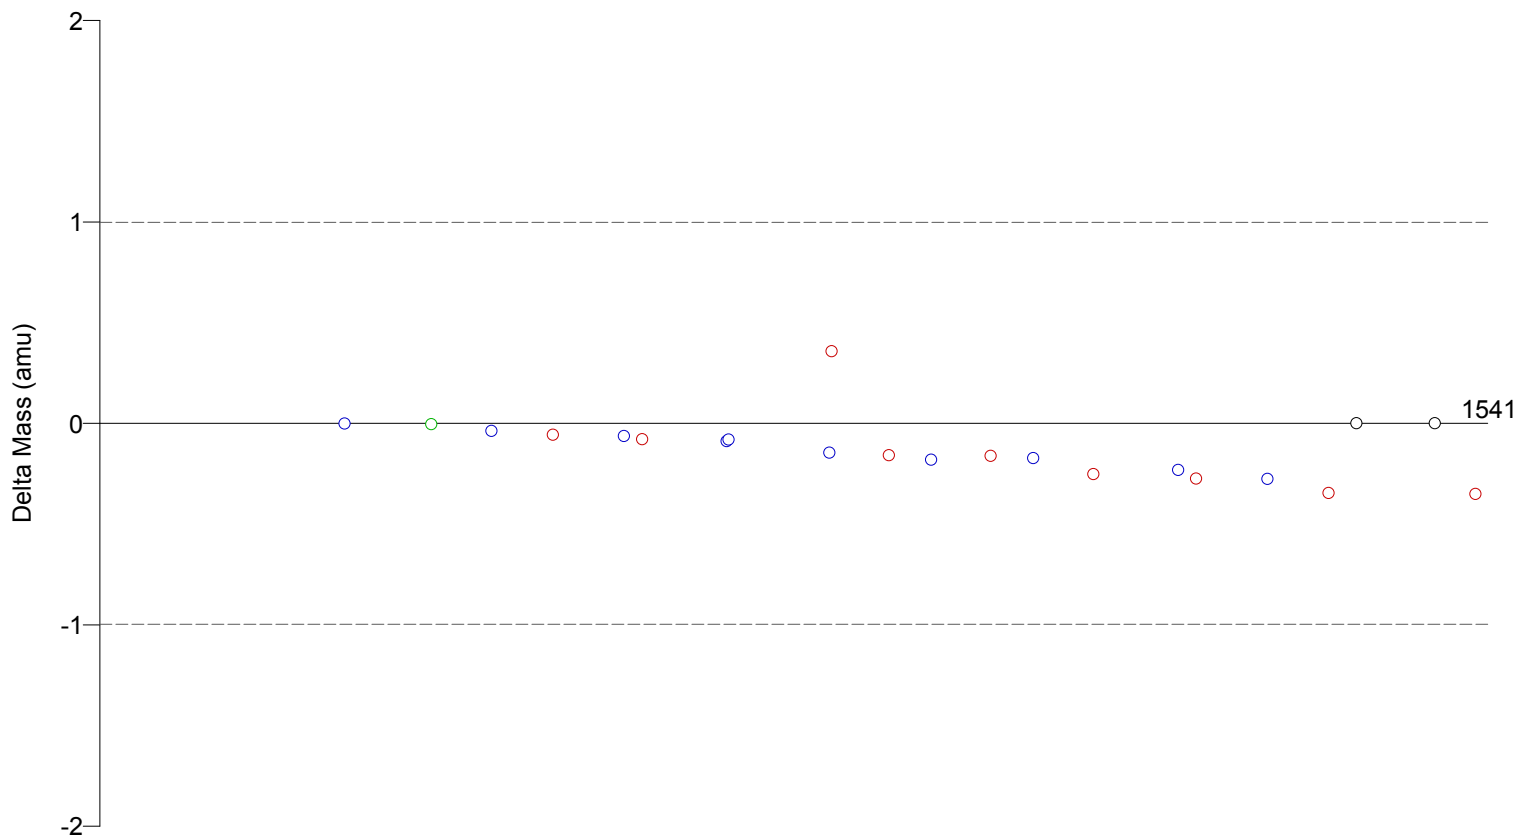

#19287468-1 NL: 2.53E6



---

| Reference                          |                     |         |   | P      | Score | Coverage | Accession |     |       |       |
|------------------------------------|---------------------|---------|---|--------|-------|----------|-----------|-----|-------|-------|
| Scan(s)                            | Sequence            | MH+     | z | P      | XC    | DeltaCn  | Sp        | RSp | Ions  | Count |
| IPI:IPI00784773.7 TREMBL:Q7Z3Y4 EN |                     |         |   | 5e-005 | 10.2  | 0.0      | 0         |     |       |       |
| 19287468 - 1                       | K.SGTASVCLLNFFYPR.E | 1798.88 | 2 | 5e-005 | 3.485 | 0.433    | 766.8     | 1   | 17/45 | 7     |

1 of 1 peptide matches reported, 0 removed due to filtering

DTA for scans: 19287468-1  
Precursor ion: 899.94  
Mass type: mono  
Mod's: (M\* +15.99492) C=161.01468

Ion series for charge: +1

| AA | A ions  | B ions         | B* ions | Bo ions | C ions | Y ions         | Y* ions | Yo ions | Z ions |
|----|---------|----------------|---------|---------|--------|----------------|---------|---------|--------|
| S  | 60.04   | 88.04          |         |         |        |                |         |         |        |
| G  | 117.07  | 145.06         |         |         |        | 1711.85        |         |         |        |
| T  | 218.11  | 246.11         |         |         |        | 1654.83        |         |         |        |
| A  | 289.15  | 317.15         |         |         |        | 1553.78        |         |         |        |
| S  | 376.18  | 404.18         |         |         |        | 1482.74        |         |         |        |
| V  | 475.25  | <b>503.25</b>  |         |         |        | 1395.71        |         |         |        |
| V  | 574.32  | <b>602.31</b>  |         |         |        | <b>1296.64</b> |         |         |        |
| C  | 735.33  | 763.33         |         |         |        | <b>1197.57</b> |         |         |        |
| L  | 848.42  | <b>876.41</b>  |         |         |        | <b>1036.56</b> |         |         |        |
| L  | 961.50  | <b>989.50</b>  |         |         |        | <b>923.47</b>  |         |         |        |
| N  | 1075.55 | <b>1103.54</b> |         |         |        | <b>810.39</b>  |         |         |        |
| N  | 1189.59 | <b>1217.58</b> |         |         |        | <b>696.35</b>  |         |         |        |
| F  | 1336.66 | <b>1364.65</b> |         |         |        | <b>582.30</b>  |         |         |        |
| Y  | 1499.72 | <b>1527.71</b> |         |         |        | <b>435.24</b>  |         |         |        |
| P  | 1596.77 | 1624.77        |         |         |        | <b>272.17</b>  |         |         |        |
| R  |         |                |         |         |        | 175.12         |         |         |        |



#19287468-1 NL: 2.53E6



---

| Reference                          |                     |         |   | P      | Score | Coverage | Accession |     |       |       |
|------------------------------------|---------------------|---------|---|--------|-------|----------|-----------|-----|-------|-------|
| Scan(s)                            | Sequence            | MH+     | z | P      | XC    | DeltaCn  | Sp        | RSp | Ions  | Count |
| IPI:IPI00784865.1 TREMBL:Q6P5S8 Ta |                     |         |   | 5e-005 | 10.2  | 0.0      | 0         |     |       |       |
| 19287468 - 1                       | K.SGTASVCLLNFFYPR.E | 1798.88 | 2 | 5e-005 | 3.485 | 0.433    | 766.8     | 1   | 17/45 | 7     |

1 of 1 peptide matches reported, 0 removed due to filtering



DTA for scans: 19287468-1  
Precursor ion: 899.94  
Mass type: mono  
Mod's: (M\* +15.99492) C=161.01468

Ion series for charge: +1

| AA | A ions  | B ions         | B* ions | Bo ions | C ions | Y ions         | Y* ions | Yo ions | Z ions |
|----|---------|----------------|---------|---------|--------|----------------|---------|---------|--------|
| S  | 60.04   | 88.04          |         |         |        |                |         |         |        |
| G  | 117.07  | 145.06         |         |         |        | 1711.85        |         |         |        |
| T  | 218.11  | 246.11         |         |         |        | 1654.83        |         |         |        |
| A  | 289.15  | 317.15         |         |         |        | 1553.78        |         |         |        |
| S  | 376.18  | 404.18         |         |         |        | 1482.74        |         |         |        |
| V  | 475.25  | <b>503.25</b>  |         |         |        | 1395.71        |         |         |        |
| V  | 574.32  | <b>602.31</b>  |         |         |        | <b>1296.64</b> |         |         |        |
| C  | 735.33  | 763.33         |         |         |        | <b>1197.57</b> |         |         |        |
| L  | 848.42  | <b>876.41</b>  |         |         |        | <b>1036.56</b> |         |         |        |
| L  | 961.50  | <b>989.50</b>  |         |         |        | <b>923.47</b>  |         |         |        |
| N  | 1075.55 | <b>1103.54</b> |         |         |        | <b>810.39</b>  |         |         |        |
| N  | 1189.59 | <b>1217.58</b> |         |         |        | <b>696.35</b>  |         |         |        |
| F  | 1336.66 | <b>1364.65</b> |         |         |        | <b>582.30</b>  |         |         |        |
| Y  | 1499.72 | <b>1527.71</b> |         |         |        | <b>435.24</b>  |         |         |        |
| P  | 1596.77 | 1624.77        |         |         |        | <b>272.17</b>  |         |         |        |
| R  |         |                |         |         |        | 175.12         |         |         |        |



#19287468-1 NL: 2.53E6



---

| Reference                          |                     |         |   | P      | Score | Coverage | Accession |     |       |       |
|------------------------------------|---------------------|---------|---|--------|-------|----------|-----------|-----|-------|-------|
| Scan(s)                            | Sequence            | MH+     | z | P      | XC    | DeltaCn  | Sp        | RSp | Ions  | Count |
| IPI:IPI00853045.1 TREMBL:Q5EFE6 Ta |                     |         |   | 5e-005 | 10.2  | 0.0      | 0         |     |       |       |
| 19287468 - 1                       | K.SGTASVCLLNIFYPR.E | 1798.88 | 2 | 5e-005 | 3.485 | 0.433    | 766.8     | 1   | 17/45 | 7     |

1 of 1 peptide matches reported, 0 removed due to filtering

DTA for scans: 19287468-1  
Precursor ion: 899.94  
Mass type: mono  
Mod's: (M\* +15.99492) C=161.01468

Ion series for charge: +1

| AA | A ions  | B ions         | B* ions | Bo ions | C ions | Y ions         | Y* ions | Yo ions | Z ions |
|----|---------|----------------|---------|---------|--------|----------------|---------|---------|--------|
| S  | 60.04   | 88.04          |         |         |        |                |         |         |        |
| G  | 117.07  | 145.06         |         |         |        | 1711.85        |         |         |        |
| T  | 218.11  | 246.11         |         |         |        | 1654.83        |         |         |        |
| A  | 289.15  | 317.15         |         |         |        | 1553.78        |         |         |        |
| S  | 376.18  | 404.18         |         |         |        | 1482.74        |         |         |        |
| V  | 475.25  | <b>503.25</b>  |         |         |        | 1395.71        |         |         |        |
| V  | 574.32  | <b>602.31</b>  |         |         |        | <b>1296.64</b> |         |         |        |
| C  | 735.33  | 763.33         |         |         |        | <b>1197.57</b> |         |         |        |
| L  | 848.42  | <b>876.41</b>  |         |         |        | <b>1036.56</b> |         |         |        |
| L  | 961.50  | <b>989.50</b>  |         |         |        | <b>923.47</b>  |         |         |        |
| N  | 1075.55 | <b>1103.54</b> |         |         |        | <b>810.39</b>  |         |         |        |
| N  | 1189.59 | <b>1217.58</b> |         |         |        | <b>696.35</b>  |         |         |        |
| F  | 1336.66 | <b>1364.65</b> |         |         |        | <b>582.30</b>  |         |         |        |
| Y  | 1499.72 | <b>1527.71</b> |         |         |        | <b>435.24</b>  |         |         |        |
| P  | 1596.77 | 1624.77        |         |         |        | <b>272.17</b>  |         |         |        |
| R  |         |                |         |         |        | 175.12         |         |         |        |



#19287468-1 NL: 2.53E6



---

| Reference                          |                     |         |   | P      | Score | Coverage | Accession |     |       |       |
|------------------------------------|---------------------|---------|---|--------|-------|----------|-----------|-----|-------|-------|
| Scan(s)                            | Sequence            | MH+     | z | P      | XC    | DeltaCn  | Sp        | RSp | Ions  | Count |
| IPI:IPI00909649.2 SWISS-PROT:P0183 |                     |         |   | 5e-005 | 10.2  | 0.0      | 0         |     |       |       |
| 19287468 - 1                       | K.SGTASVCLLNIFYPR.E | 1798.88 | 2 | 5e-005 | 3.485 | 0.433    | 766.8     | 1   | 17/45 | 7     |

1 of 1 peptide matches reported, 0 removed due to filtering

DTA for scans: 19287468-1  
Precursor ion: 899.94  
Mass type: mono  
Mod's: (M\* +15.99492) C=161.01468

Ion series for charge: +1

| AA | A ions  | B ions         | B* ions | Bo ions | C ions | Y ions         | Y* ions | Yo ions | Z ions |
|----|---------|----------------|---------|---------|--------|----------------|---------|---------|--------|
| S  | 60.04   | 88.04          |         |         |        |                |         |         |        |
| G  | 117.07  | 145.06         |         |         |        | 1711.85        |         |         |        |
| T  | 218.11  | 246.11         |         |         |        | 1654.83        |         |         |        |
| A  | 289.15  | 317.15         |         |         |        | 1553.78        |         |         |        |
| S  | 376.18  | 404.18         |         |         |        | 1482.74        |         |         |        |
| V  | 475.25  | <b>503.25</b>  |         |         |        | 1395.71        |         |         |        |
| V  | 574.32  | <b>602.31</b>  |         |         |        | <b>1296.64</b> |         |         |        |
| C  | 735.33  | 763.33         |         |         |        | <b>1197.57</b> |         |         |        |
| L  | 848.42  | <b>876.41</b>  |         |         |        | <b>1036.56</b> |         |         |        |
| L  | 961.50  | <b>989.50</b>  |         |         |        | <b>923.47</b>  |         |         |        |
| N  | 1075.55 | <b>1103.54</b> |         |         |        | <b>810.39</b>  |         |         |        |
| N  | 1189.59 | <b>1217.58</b> |         |         |        | <b>696.35</b>  |         |         |        |
| F  | 1336.66 | <b>1364.65</b> |         |         |        | <b>582.30</b>  |         |         |        |
| Y  | 1499.72 | <b>1527.71</b> |         |         |        | <b>435.24</b>  |         |         |        |
| P  | 1596.77 | 1624.77        |         |         |        | <b>272.17</b>  |         |         |        |
| R  |         |                |         |         |        | 175.12         |         |         |        |



#19287468-1 NL: 2.53E6





---

| Reference                          |                    |         |   | P      | Score | Coverage | Accession |     |       |       |
|------------------------------------|--------------------|---------|---|--------|-------|----------|-----------|-----|-------|-------|
| Scan(s)                            | Sequence           | MH+     | z | P      | XC    | DeltaCn  | Sp        | RSp | Ions  | Count |
| IPI:IPI00658130.1 TREMBL:Q5NV84;Q6 | K.RPSGVPDR.F       | 883.47  | 2 | 0.1    | 2.914 | 0.384    | 612.6     | 1   | 14/21 | 8     |
| 19287468 - 1                       | K.YAASSYLSTPEQWK.S | 1743.86 | 2 | 5e-005 | 3.671 | 0.433    | 421.7     | 1   | 16/42 | 15    |

2 of 2 peptide matches reported, 0 removed due to filtering

DTA for scan: 0  
Precursor ion: 442.24  
Mass type: mono  
Mod's: (M\* +15.99492) C=161.01468

Ion series for charge: +1

| AA | A ions        | B ions        | B* ions | Bo ions | C ions | Y ions        | Y* ions | Yo ions | Z ions |
|----|---------------|---------------|---------|---------|--------|---------------|---------|---------|--------|
| R  | 129.11        | <b>157.11</b> |         |         |        |               |         |         |        |
| P  | 226.17        | <b>254.16</b> |         |         |        | <b>727.37</b> |         |         |        |
| S  | 313.20        | 341.19        |         |         |        | <b>630.32</b> |         |         |        |
| G  | <b>370.22</b> | 398.21        |         |         |        | <b>543.29</b> |         |         |        |
| V  | <b>469.29</b> | <b>497.28</b> |         |         |        | 486.27        |         |         |        |
| P  | 566.34        | <b>594.34</b> |         |         |        | <b>387.20</b> |         |         |        |
| D  | 681.37        | <b>709.36</b> |         |         |        | 290.15        |         |         |        |
| R  |               |               |         |         |        | <b>175.12</b> |         |         |        |

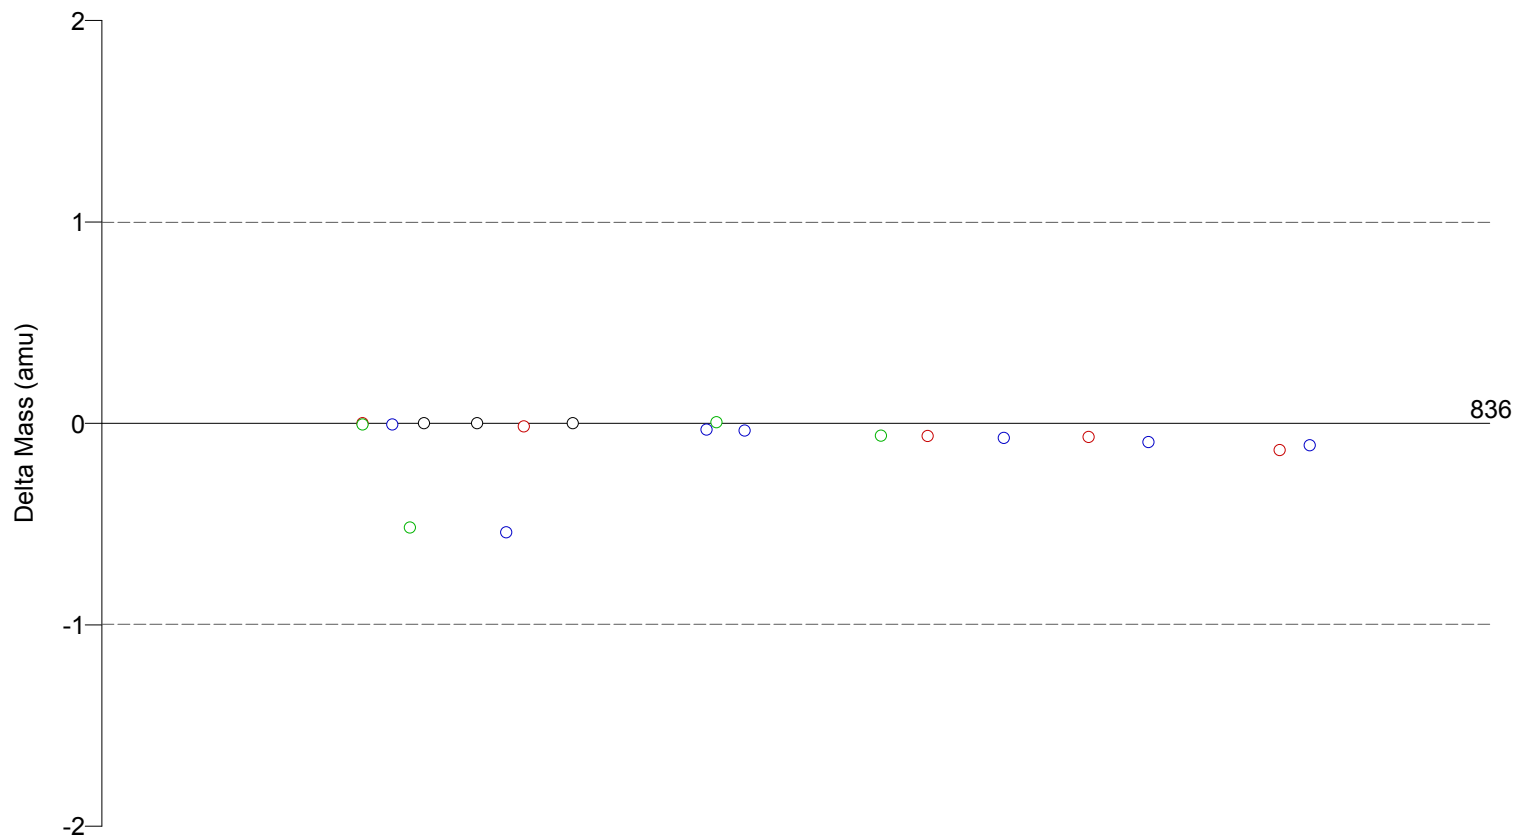

#0-0 NL: 6.35E5

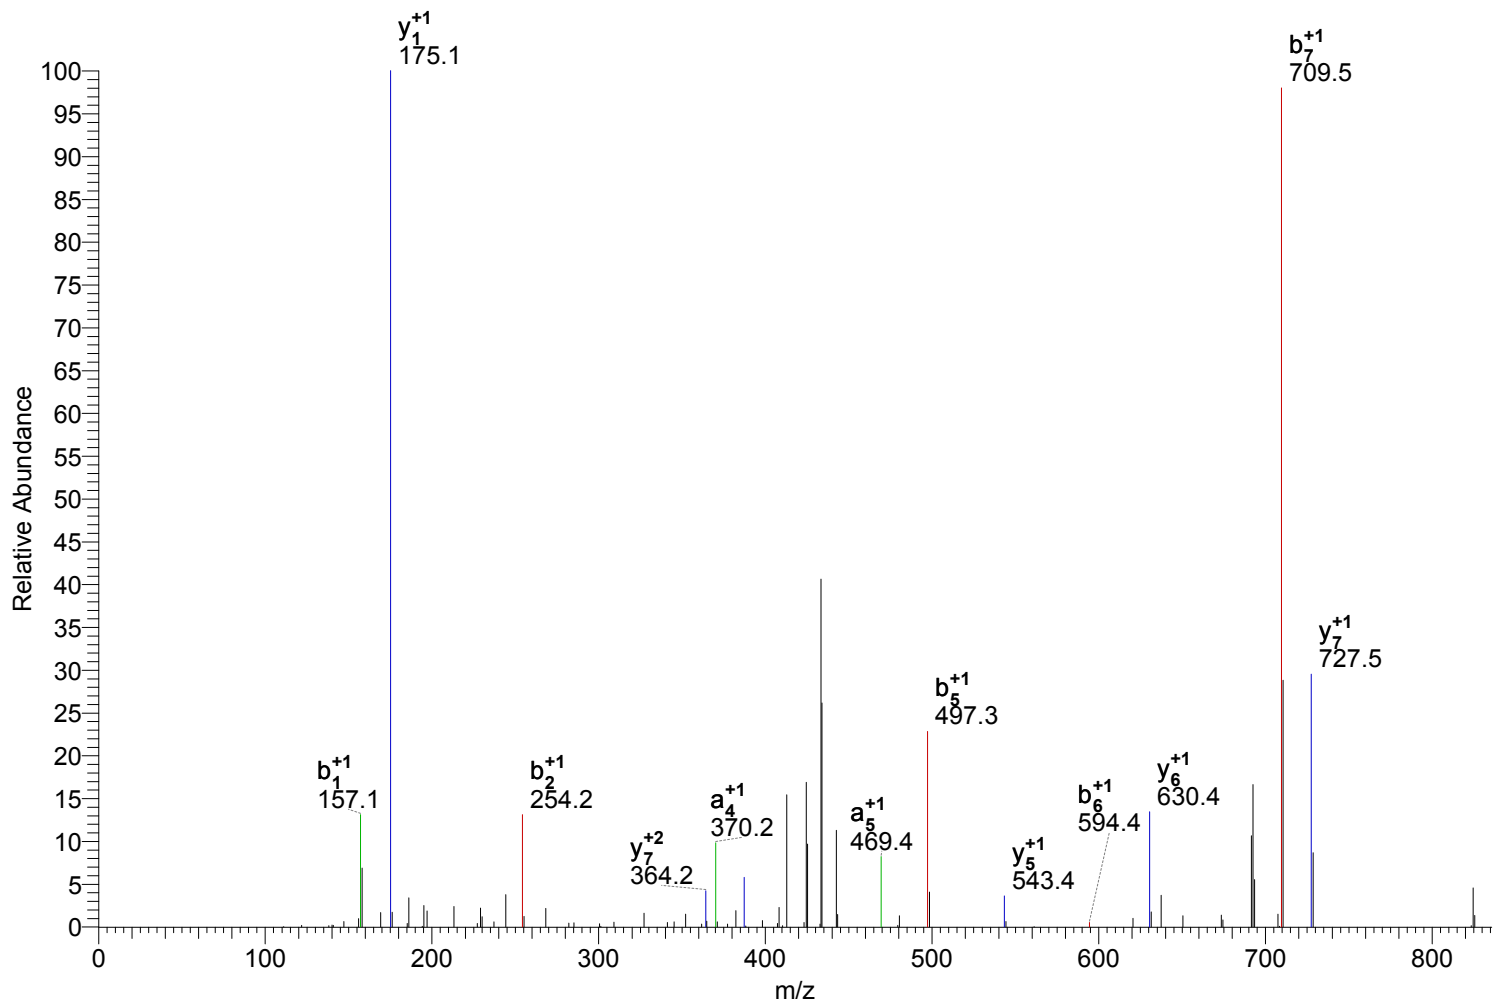

DTA for scans: 19287468-1  
Precursor ion: 872.44  
Mass type: mono  
Mod's: (M\* +15.99492) C=161.01468

Ion series for charge: +1

| AA | A ions  | B ions  | B* ions | Bo ions | C ions | Y ions  | Y* ions | Yo ions | Z ions |
|----|---------|---------|---------|---------|--------|---------|---------|---------|--------|
| Y  | 136.08  | 164.07  |         |         |        |         |         |         |        |
| A  | 207.11  | 235.11  |         |         |        | 1580.80 |         |         |        |
| A  | 278.15  | 306.14  |         |         |        | 1509.76 |         |         |        |
| S  | 365.18  | 393.18  |         |         |        | 1438.72 |         |         |        |
| S  | 452.21  | 480.21  |         |         |        | 1351.69 |         |         |        |
| Y  | 615.28  | 643.27  |         |         |        | 1264.66 |         |         |        |
| L  | 728.36  | 756.36  |         |         |        | 1101.59 |         |         |        |
| S  | 815.39  | 843.39  |         |         |        | 988.51  |         |         |        |
| L  | 928.48  | 956.47  |         |         |        | 901.48  |         |         |        |
| T  | 1029.53 | 1057.52 |         |         |        | 788.39  |         |         |        |
| P  | 1126.58 | 1154.57 |         |         |        | 687.35  |         |         |        |
| E  | 1255.62 | 1283.62 |         |         |        | 590.29  |         |         |        |
| Q  | 1383.68 | 1411.67 |         |         |        | 461.25  |         |         |        |
| W  | 1569.76 | 1597.75 |         |         |        | 333.19  |         |         |        |
| K  |         |         |         |         |        | 147.11  |         |         |        |

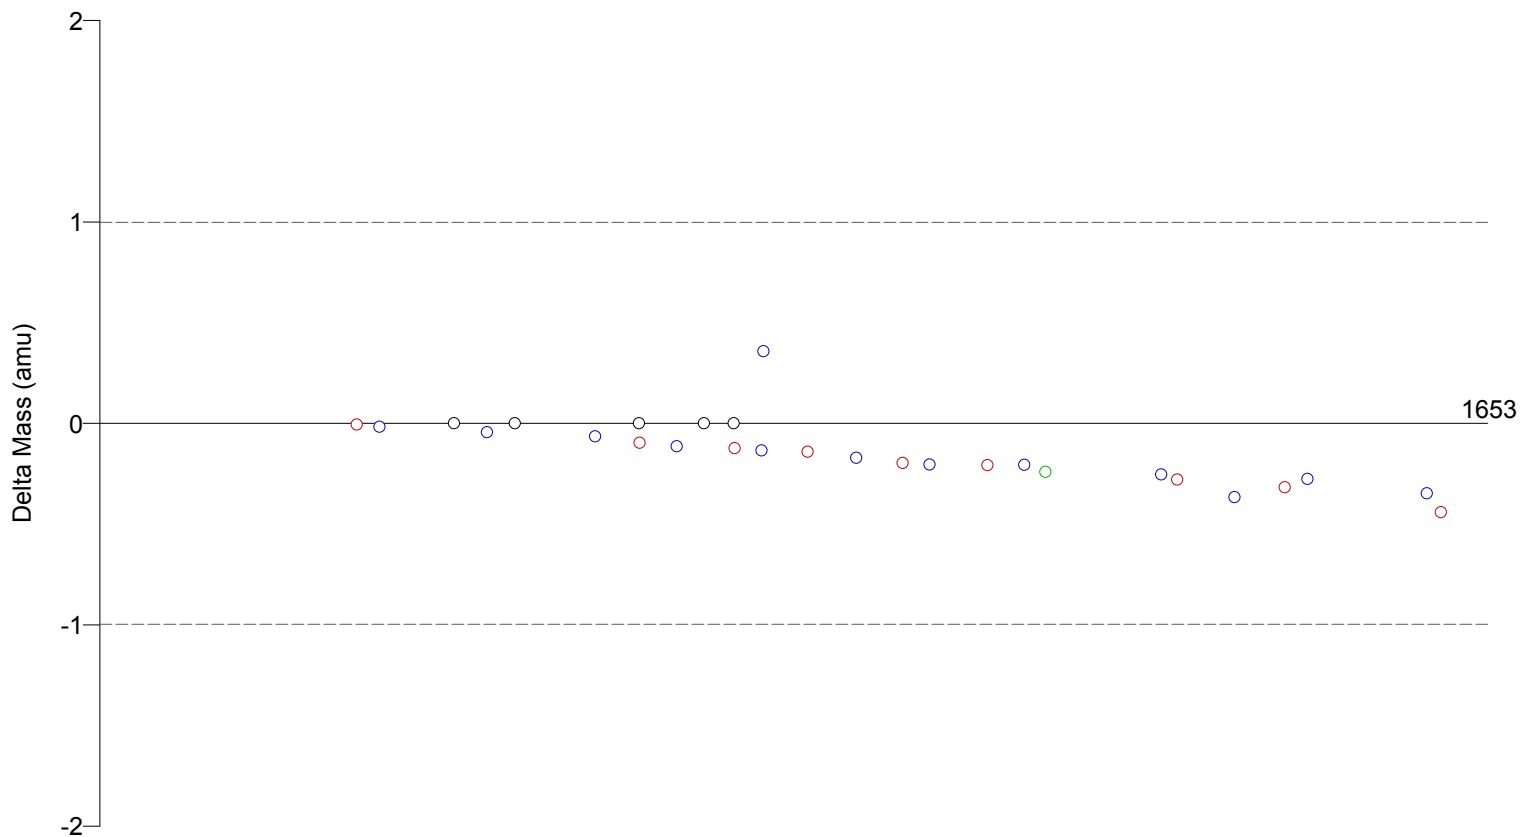

#19287468-1 NL: 1.22E5

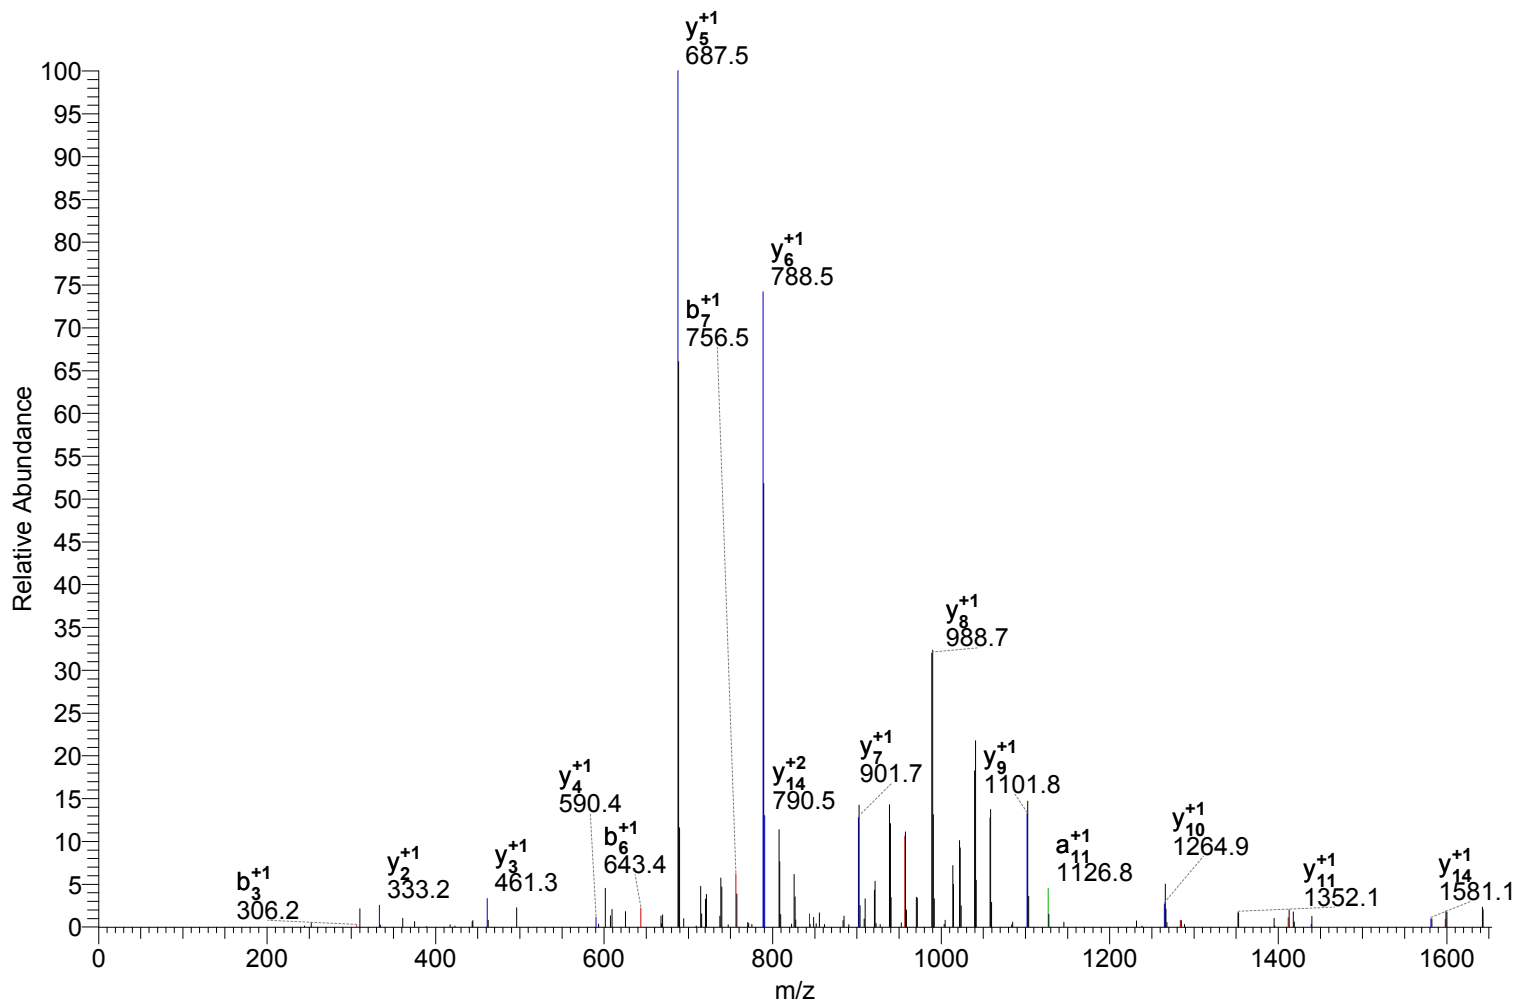

---

| Reference                          |                    |         |   | P      | Score | Coverage | Accession |     |       |       |
|------------------------------------|--------------------|---------|---|--------|-------|----------|-----------|-----|-------|-------|
| Scan(s)                            | Sequence           | MH+     | z | P      | XC    | DeltaCn  | Sp        | RSp | Ions  | Count |
| IPI:IPI00807428.1 TREMBL:A0A5E4 Ta |                    |         |   | 5e-005 | 20.2  | 0.0      | 0         |     |       |       |
| 19287468 - 1                       | R.FSGSILGNK.A      | 922.50  | 2 | 0.004  | 2.914 | 0.340    | 661.6     | 1   | 16/24 | 2     |
| 19287468 - 1                       | K.YAASSYLSTPEQWK.S | 1743.86 | 2 | 5e-005 | 3.671 | 0.433    | 421.7     | 1   | 16/42 | 15    |

2 of 2 peptide matches reported, 0 removed due to filtering

DTA for scans: 19287468-1  
Precursor ion: 461.76  
Mass type: mono  
Mod's: (M\* +15.99492) C=161.01468

Ion series for charge: +1

| AA | A ions        | B ions        | B* ions | Bo ions | C ions | Y ions        | Y* ions | Yo ions | Z ions |
|----|---------------|---------------|---------|---------|--------|---------------|---------|---------|--------|
| F  | <b>120.08</b> | 148.08        |         |         |        |               |         |         |        |
| S  | <b>207.11</b> | <b>235.11</b> |         |         |        | <b>775.43</b> |         |         |        |
| G  | 264.13        | 292.13        |         |         |        | <b>688.40</b> |         |         |        |
| S  | 351.17        | <b>379.16</b> |         |         |        | <b>631.38</b> |         |         |        |
| I  | 464.25        | <b>492.25</b> |         |         |        | <b>544.35</b> |         |         |        |
| L  | <b>577.33</b> | <b>605.33</b> |         |         |        | <b>431.26</b> |         |         |        |
| G  | 634.36        | 662.35        |         |         |        | <b>318.18</b> |         |         |        |
| N  | 748.40        | 776.39        |         |         |        | <b>261.16</b> |         |         |        |
| K  |               |               |         |         |        | <b>147.11</b> |         |         |        |

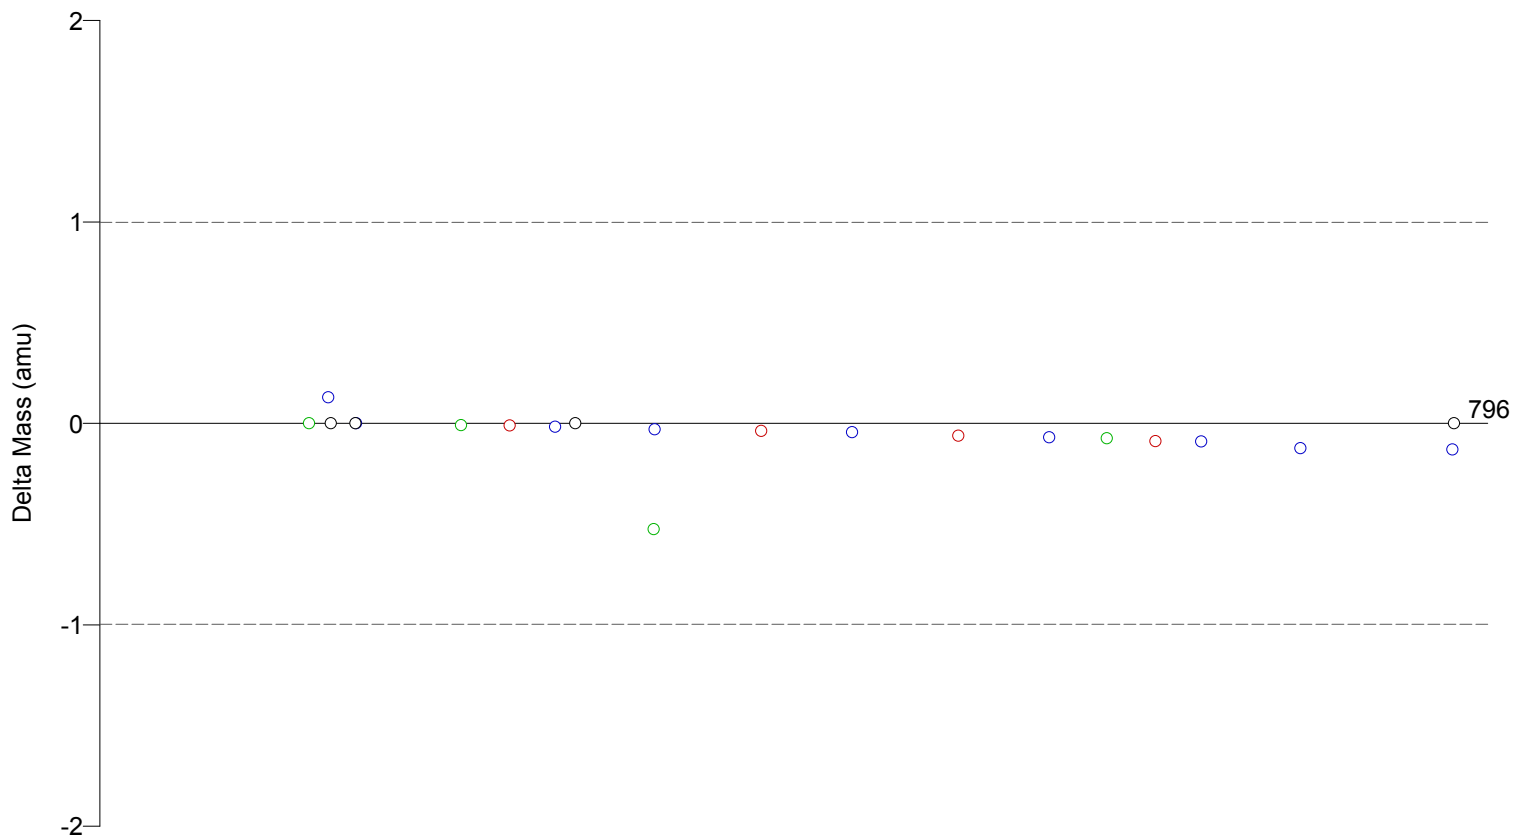

#19287468-1 NL: 1.73E5

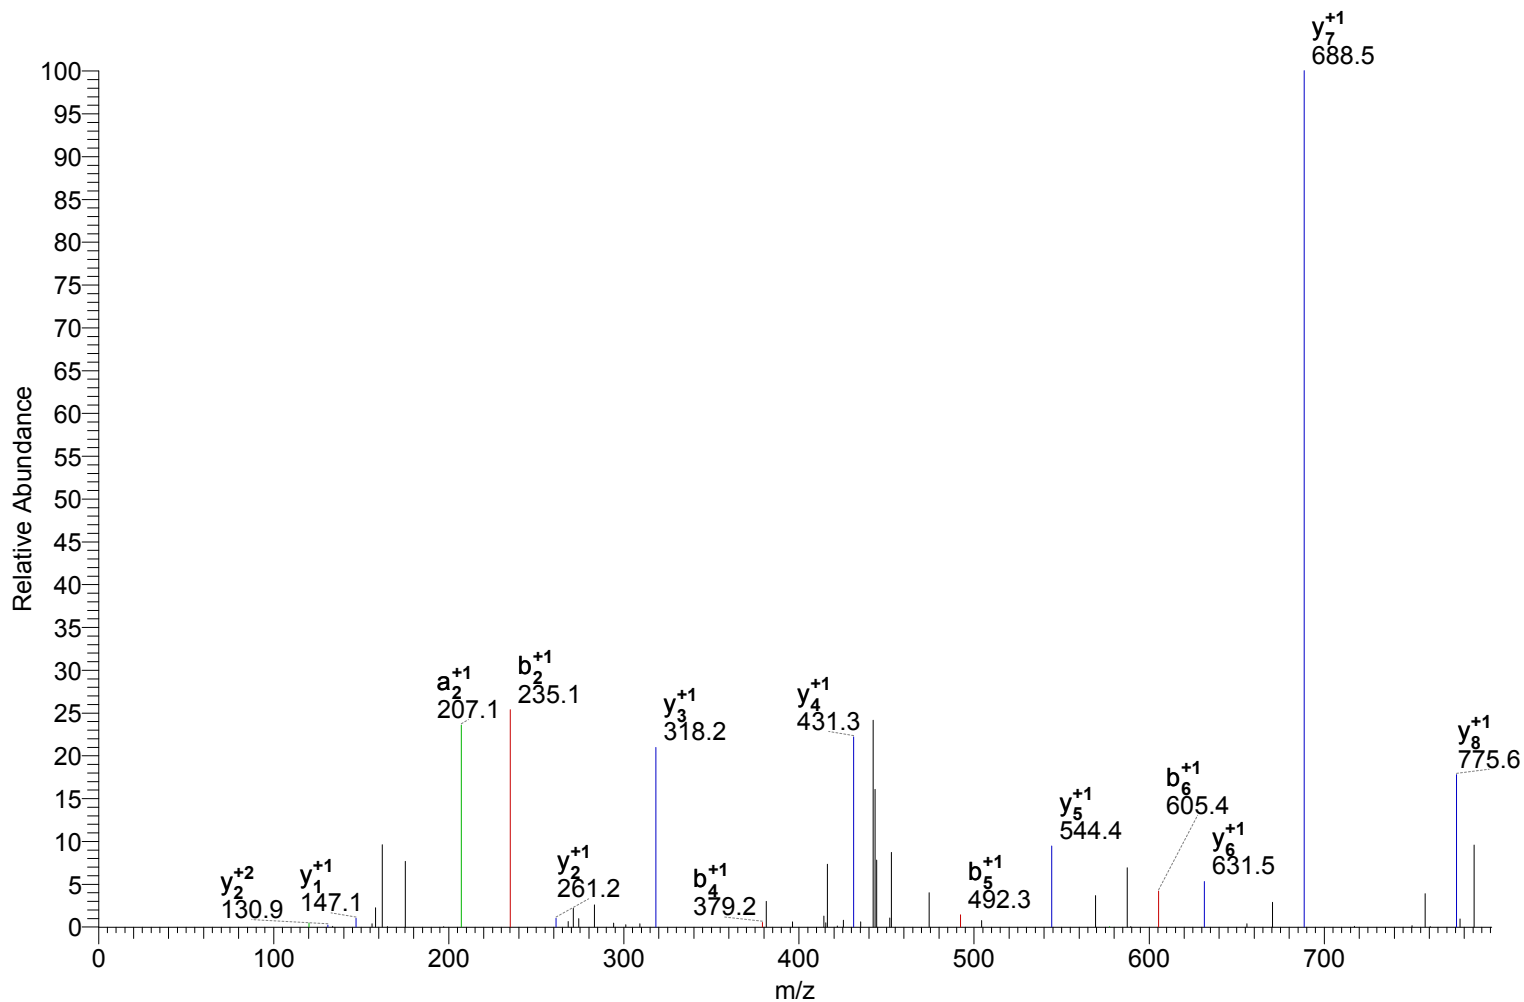



DTA for scans: 19287468-1  
Precursor ion: 872.44  
Mass type: mono  
Mod's: (M\* +15.99492) C=161.01468

Ion series for charge: +1

| AA | A ions  | B ions  | B* ions | Bo ions | C ions | Y ions  | Y* ions | Yo ions | Z ions |
|----|---------|---------|---------|---------|--------|---------|---------|---------|--------|
| Y  | 136.08  | 164.07  |         |         |        |         |         |         |        |
| A  | 207.11  | 235.11  |         |         |        | 1580.80 |         |         |        |
| A  | 278.15  | 306.14  |         |         |        | 1509.76 |         |         |        |
| S  | 365.18  | 393.18  |         |         |        | 1438.72 |         |         |        |
| S  | 452.21  | 480.21  |         |         |        | 1351.69 |         |         |        |
| Y  | 615.28  | 643.27  |         |         |        | 1264.66 |         |         |        |
| L  | 728.36  | 756.36  |         |         |        | 1101.59 |         |         |        |
| S  | 815.39  | 843.39  |         |         |        | 988.51  |         |         |        |
| L  | 928.48  | 956.47  |         |         |        | 901.48  |         |         |        |
| T  | 1029.53 | 1057.52 |         |         |        | 788.39  |         |         |        |
| P  | 1126.58 | 1154.57 |         |         |        | 687.35  |         |         |        |
| E  | 1255.62 | 1283.62 |         |         |        | 590.29  |         |         |        |
| Q  | 1383.68 | 1411.67 |         |         |        | 461.25  |         |         |        |
| W  | 1569.76 | 1597.75 |         |         |        | 333.19  |         |         |        |
| K  |         |         |         |         |        | 147.11  |         |         |        |



#19287468-1 NL: 1.22E5



---

| Reference                                                      |                     |         |   | P      | Score | Coverage | Accession |     |       |       |  |
|----------------------------------------------------------------|---------------------|---------|---|--------|-------|----------|-----------|-----|-------|-------|--|
| Scan(s)                                                        | Sequence            | MH+     | z | P      | XC    | DeltaCn  | Sp        | RSp | Ions  | Count |  |
| IPI:IPI00154742.6 SWISS-PROT:P01842 TREMBL:Q6PJR7;Q8N355;Q8TCJ |                     |         |   | 5e-005 | 10.2  | 0.0      | 0         |     |       |       |  |
| 19287468 - 1                                                   | K.YAASSYLSLTPEQWK.S | 1743.86 | 2 | 5e-005 | 3.671 | 0.433    | 421.7     | 1   | 16/42 | 15    |  |

1 of 1 peptide matches reported, 0 removed due to filtering

DTA for scans: 19287468-1  
Precursor ion: 872.44  
Mass type: mono  
Mod's: (M\* +15.99492) C=161.01468

Ion series for charge: +1

| AA | A ions  | B ions  | B* ions | Bo ions | C ions | Y ions  | Y* ions | Yo ions | Z ions |
|----|---------|---------|---------|---------|--------|---------|---------|---------|--------|
| Y  | 136.08  | 164.07  |         |         |        |         |         |         |        |
| A  | 207.11  | 235.11  |         |         |        | 1580.80 |         |         |        |
| A  | 278.15  | 306.14  |         |         |        | 1509.76 |         |         |        |
| S  | 365.18  | 393.18  |         |         |        | 1438.72 |         |         |        |
| S  | 452.21  | 480.21  |         |         |        | 1351.69 |         |         |        |
| Y  | 615.28  | 643.27  |         |         |        | 1264.66 |         |         |        |
| L  | 728.36  | 756.36  |         |         |        | 1101.59 |         |         |        |
| S  | 815.39  | 843.39  |         |         |        | 988.51  |         |         |        |
| L  | 928.48  | 956.47  |         |         |        | 901.48  |         |         |        |
| T  | 1029.53 | 1057.52 |         |         |        | 788.39  |         |         |        |
| P  | 1126.58 | 1154.57 |         |         |        | 687.35  |         |         |        |
| E  | 1255.62 | 1283.62 |         |         |        | 590.29  |         |         |        |
| Q  | 1383.68 | 1411.67 |         |         |        | 461.25  |         |         |        |
| W  | 1569.76 | 1597.75 |         |         |        | 333.19  |         |         |        |
| K  |         |         |         |         |        | 147.11  |         |         |        |



#19287468-1 NL: 1.22E5



---

| Reference                          |                     |         |   | P      | Score | Coverage | Accession |     |       |       |
|------------------------------------|---------------------|---------|---|--------|-------|----------|-----------|-----|-------|-------|
| Scan(s)                            | Sequence            | MH+     | z | P      | XC    | DeltaCn  | Sp        | RSp | Ions  | Count |
| IPI:IPI00450309.1 TREMBL:Q6IN99 Ta |                     |         |   | 5e-005 | 10.2  | 0.0      | 0         |     |       |       |
| 19287468 - 1                       | K.YAASSYLSLTPEQWK.S | 1743.86 | 2 | 5e-005 | 3.671 | 0.433    | 421.7     | 1   | 16/42 | 15    |

1 of 1 peptide matches reported, 0 removed due to filtering

DTA for scans: 19287468-1  
Precursor ion: 872.44  
Mass type: mono  
Mod's: (M\* +15.99492) C=161.01468

Ion series for charge: +1

| AA | A ions         | B ions         | B* ions | Bo ions | C ions | Y ions         | Y* ions | Yo ions | Z ions |
|----|----------------|----------------|---------|---------|--------|----------------|---------|---------|--------|
| Y  | 136.08         | 164.07         |         |         |        |                |         |         |        |
| A  | 207.11         | 235.11         |         |         |        | <b>1580.80</b> |         |         |        |
| A  | 278.15         | <b>306.14</b>  |         |         |        | 1509.76        |         |         |        |
| S  | 365.18         | 393.18         |         |         |        | <b>1438.72</b> |         |         |        |
| S  | 452.21         | 480.21         |         |         |        | <b>1351.69</b> |         |         |        |
| Y  | 615.28         | <b>643.27</b>  |         |         |        | <b>1264.66</b> |         |         |        |
| L  | 728.36         | <b>756.36</b>  |         |         |        | <b>1101.59</b> |         |         |        |
| S  | 815.39         | <b>843.39</b>  |         |         |        | <b>988.51</b>  |         |         |        |
| L  | 928.48         | <b>956.47</b>  |         |         |        | <b>901.48</b>  |         |         |        |
| T  | 1029.53        | <b>1057.52</b> |         |         |        | <b>788.39</b>  |         |         |        |
| P  | <b>1126.58</b> | 1154.57        |         |         |        | <b>687.35</b>  |         |         |        |
| E  | 1255.62        | <b>1283.62</b> |         |         |        | <b>590.29</b>  |         |         |        |
| Q  | 1383.68        | <b>1411.67</b> |         |         |        | <b>461.25</b>  |         |         |        |
| W  | 1569.76        | <b>1597.75</b> |         |         |        | <b>333.19</b>  |         |         |        |
| K  |                |                |         |         |        | 147.11         |         |         |        |



#19287468-1 NL: 1.22E5





---

| Reference                          |                     |         |   | P      | Score | Coverage | Accession |     |       |       |
|------------------------------------|---------------------|---------|---|--------|-------|----------|-----------|-----|-------|-------|
| Scan(s)                            | Sequence            | MH+     | z | P      | XC    | DeltaCn  | Sp        | RSp | Ions  | Count |
| IPI:IPI00642632.1 TREMBL:A0M8Q6 EN |                     |         |   | 5e-005 | 10.2  | 0.0      | 0         |     |       |       |
| 19287468 - 1                       | K.YAASSYLSLTPEQWK.S | 1743.86 | 2 | 5e-005 | 3.671 | 0.433    | 421.7     | 1   | 16/42 | 15    |

1 of 1 peptide matches reported, 0 removed due to filtering

DTA for scans: 19287468-1  
Precursor ion: 872.44  
Mass type: mono  
Mod's: (M\* +15.99492) C=161.01468

Ion series for charge: +1

| AA | A ions  | B ions  | B* ions | Bo ions | C ions | Y ions  | Y* ions | Yo ions | Z ions |
|----|---------|---------|---------|---------|--------|---------|---------|---------|--------|
| Y  | 136.08  | 164.07  |         |         |        |         |         |         |        |
| A  | 207.11  | 235.11  |         |         |        | 1580.80 |         |         |        |
| A  | 278.15  | 306.14  |         |         |        | 1509.76 |         |         |        |
| S  | 365.18  | 393.18  |         |         |        | 1438.72 |         |         |        |
| S  | 452.21  | 480.21  |         |         |        | 1351.69 |         |         |        |
| Y  | 615.28  | 643.27  |         |         |        | 1264.66 |         |         |        |
| L  | 728.36  | 756.36  |         |         |        | 1101.59 |         |         |        |
| S  | 815.39  | 843.39  |         |         |        | 988.51  |         |         |        |
| L  | 928.48  | 956.47  |         |         |        | 901.48  |         |         |        |
| T  | 1029.53 | 1057.52 |         |         |        | 788.39  |         |         |        |
| P  | 1126.58 | 1154.57 |         |         |        | 687.35  |         |         |        |
| E  | 1255.62 | 1283.62 |         |         |        | 590.29  |         |         |        |
| Q  | 1383.68 | 1411.67 |         |         |        | 461.25  |         |         |        |
| W  | 1569.76 | 1597.75 |         |         |        | 333.19  |         |         |        |
| K  |         |         |         |         |        | 147.11  |         |         |        |



#19287468-1 NL: 1.22E5



---

| Reference                          |                     |         |   | P      | Score | Coverage | Accession |     |       |       |
|------------------------------------|---------------------|---------|---|--------|-------|----------|-----------|-----|-------|-------|
| Scan(s)                            | Sequence            | MH+     | z | P      | XC    | DeltaCn  | Sp        | RSp | Ions  | Count |
| IPI:IPI00719373.2 TREMBL:Q6NS95 EN |                     |         |   | 5e-005 | 10.2  | 0.0      | 0         |     |       |       |
| 19287468 - 1                       | K.YAASSYLSLTPEQWK.S | 1743.86 | 2 | 5e-005 | 3.671 | 0.433    | 421.7     | 1   | 16/42 | 15    |

1 of 1 peptide matches reported, 0 removed due to filtering

DTA for scans: 19287468-1  
Precursor ion: 872.44  
Mass type: mono  
Mod's: (M\* +15.99492) C=161.01468

Ion series for charge: +1

| AA | A ions  | B ions  | B* ions | Bo ions | C ions | Y ions  | Y* ions | Yo ions | Z ions |
|----|---------|---------|---------|---------|--------|---------|---------|---------|--------|
| Y  | 136.08  | 164.07  |         |         |        |         |         |         |        |
| A  | 207.11  | 235.11  |         |         |        | 1580.80 |         |         |        |
| A  | 278.15  | 306.14  |         |         |        | 1509.76 |         |         |        |
| S  | 365.18  | 393.18  |         |         |        | 1438.72 |         |         |        |
| S  | 452.21  | 480.21  |         |         |        | 1351.69 |         |         |        |
| Y  | 615.28  | 643.27  |         |         |        | 1264.66 |         |         |        |
| L  | 728.36  | 756.36  |         |         |        | 1101.59 |         |         |        |
| S  | 815.39  | 843.39  |         |         |        | 988.51  |         |         |        |
| L  | 928.48  | 956.47  |         |         |        | 901.48  |         |         |        |
| T  | 1029.53 | 1057.52 |         |         |        | 788.39  |         |         |        |
| P  | 1126.58 | 1154.57 |         |         |        | 687.35  |         |         |        |
| E  | 1255.62 | 1283.62 |         |         |        | 590.29  |         |         |        |
| Q  | 1383.68 | 1411.67 |         |         |        | 461.25  |         |         |        |
| W  | 1569.76 | 1597.75 |         |         |        | 333.19  |         |         |        |
| K  |         |         |         |         |        | 147.11  |         |         |        |



#19287468-1 NL: 1.22E5



---

| Reference                          |                     |         |   | P      | Score | Coverage | Accession |     |       |       |
|------------------------------------|---------------------|---------|---|--------|-------|----------|-----------|-----|-------|-------|
| Scan(s)                            | Sequence            | MH+     | z | P      | XC    | DeltaCn  | Sp        | RSp | Ions  | Count |
| IPI:IPI00719452.1 TREMBL:Q5NV69;Q6 |                     |         |   | 5e-005 | 10.2  | 0.0      | 0         |     |       |       |
| 19287468 - 1                       | K.YAASSYLSLTPEQWK.S | 1743.86 | 2 | 5e-005 | 3.671 | 0.433    | 421.7     | 1   | 16/42 | 15    |

1 of 1 peptide matches reported, 0 removed due to filtering

DTA for scans: 19287468-1  
Precursor ion: 872.44  
Mass type: mono  
Mod's: (M\* +15.99492) C=161.01468

Ion series for charge: +1

| AA | A ions  | B ions  | B* ions | Bo ions | C ions | Y ions  | Y* ions | Yo ions | Z ions |
|----|---------|---------|---------|---------|--------|---------|---------|---------|--------|
| Y  | 136.08  | 164.07  |         |         |        |         |         |         |        |
| A  | 207.11  | 235.11  |         |         |        | 1580.80 |         |         |        |
| A  | 278.15  | 306.14  |         |         |        | 1509.76 |         |         |        |
| S  | 365.18  | 393.18  |         |         |        | 1438.72 |         |         |        |
| S  | 452.21  | 480.21  |         |         |        | 1351.69 |         |         |        |
| Y  | 615.28  | 643.27  |         |         |        | 1264.66 |         |         |        |
| L  | 728.36  | 756.36  |         |         |        | 1101.59 |         |         |        |
| S  | 815.39  | 843.39  |         |         |        | 988.51  |         |         |        |
| L  | 928.48  | 956.47  |         |         |        | 901.48  |         |         |        |
| T  | 1029.53 | 1057.52 |         |         |        | 788.39  |         |         |        |
| P  | 1126.58 | 1154.57 |         |         |        | 687.35  |         |         |        |
| E  | 1255.62 | 1283.62 |         |         |        | 590.29  |         |         |        |
| Q  | 1383.68 | 1411.67 |         |         |        | 461.25  |         |         |        |
| W  | 1569.76 | 1597.75 |         |         |        | 333.19  |         |         |        |
| K  |         |         |         |         |        | 147.11  |         |         |        |





#19287468-1 NL: 1.22E5



---

| Reference                          |                     |         |   | P      | Score | Coverage | Accession |     |       |       |
|------------------------------------|---------------------|---------|---|--------|-------|----------|-----------|-----|-------|-------|
| Scan(s)                            | Sequence            | MH+     | z | P      | XC    | DeltaCn  | Sp        | RSp | Ions  | Count |
| IPI:IPI00744476.6 TREMBL:A2MYD6;Q6 |                     |         |   | 5e-005 | 10.2  | 0.0      | 0         |     |       |       |
| 19287468 - 1                       | K.YAASSYLSLTPEQWK.S | 1743.86 | 2 | 5e-005 | 3.671 | 0.433    | 421.7     | 1   | 16/42 | 15    |

1 of 1 peptide matches reported, 0 removed due to filtering

DTA for scans: 19287468-1  
Precursor ion: 872.44  
Mass type: mono  
Mod's: (M\* +15.99492) C=161.01468

Ion series for charge: +1

| AA | A ions  | B ions  | B* ions | Bo ions | C ions | Y ions  | Y* ions | Yo ions | Z ions |
|----|---------|---------|---------|---------|--------|---------|---------|---------|--------|
| Y  | 136.08  | 164.07  |         |         |        |         |         |         |        |
| A  | 207.11  | 235.11  |         |         |        | 1580.80 |         |         |        |
| A  | 278.15  | 306.14  |         |         |        | 1509.76 |         |         |        |
| S  | 365.18  | 393.18  |         |         |        | 1438.72 |         |         |        |
| S  | 452.21  | 480.21  |         |         |        | 1351.69 |         |         |        |
| Y  | 615.28  | 643.27  |         |         |        | 1264.66 |         |         |        |
| L  | 728.36  | 756.36  |         |         |        | 1101.59 |         |         |        |
| S  | 815.39  | 843.39  |         |         |        | 988.51  |         |         |        |
| L  | 928.48  | 956.47  |         |         |        | 901.48  |         |         |        |
| T  | 1029.53 | 1057.52 |         |         |        | 788.39  |         |         |        |
| P  | 1126.58 | 1154.57 |         |         |        | 687.35  |         |         |        |
| E  | 1255.62 | 1283.62 |         |         |        | 590.29  |         |         |        |
| Q  | 1383.68 | 1411.67 |         |         |        | 461.25  |         |         |        |
| W  | 1569.76 | 1597.75 |         |         |        | 333.19  |         |         |        |
| K  |         |         |         |         |        | 147.11  |         |         |        |



#19287468-1 NL: 1.22E5



---

| Reference                          |                     |         |   | P      | Score | Coverage | Accession |     |       |       |
|------------------------------------|---------------------|---------|---|--------|-------|----------|-----------|-----|-------|-------|
| Scan(s)                            | Sequence            | MH+     | z | P      | XC    | DeltaCn  | Sp        | RSp | Ions  | Count |
| IPI:IPI00784935.1 TREMBL:Q6GMW3 Ta |                     |         |   | 5e-005 | 10.2  | 0.0      | 0         |     |       |       |
| 19287468 - 1                       | K.YAASSYLSLTPEQWK.S | 1743.86 | 2 | 5e-005 | 3.671 | 0.433    | 421.7     | 1   | 16/42 | 15    |

1 of 1 peptide matches reported, 0 removed due to filtering

DTA for scans: 19287468-1  
Precursor ion: 872.44  
Mass type: mono  
Mod's: (M\* +15.99492) C=161.01468

Ion series for charge: +1

| AA | A ions  | B ions  | B* ions | Bo ions | C ions | Y ions  | Y* ions | Yo ions | Z ions |
|----|---------|---------|---------|---------|--------|---------|---------|---------|--------|
| Y  | 136.08  | 164.07  |         |         |        |         |         |         |        |
| A  | 207.11  | 235.11  |         |         |        | 1580.80 |         |         |        |
| A  | 278.15  | 306.14  |         |         |        | 1509.76 |         |         |        |
| S  | 365.18  | 393.18  |         |         |        | 1438.72 |         |         |        |
| S  | 452.21  | 480.21  |         |         |        | 1351.69 |         |         |        |
| Y  | 615.28  | 643.27  |         |         |        | 1264.66 |         |         |        |
| L  | 728.36  | 756.36  |         |         |        | 1101.59 |         |         |        |
| S  | 815.39  | 843.39  |         |         |        | 988.51  |         |         |        |
| L  | 928.48  | 956.47  |         |         |        | 901.48  |         |         |        |
| T  | 1029.53 | 1057.52 |         |         |        | 788.39  |         |         |        |
| P  | 1126.58 | 1154.57 |         |         |        | 687.35  |         |         |        |
| E  | 1255.62 | 1283.62 |         |         |        | 590.29  |         |         |        |
| Q  | 1383.68 | 1411.67 |         |         |        | 461.25  |         |         |        |
| W  | 1569.76 | 1597.75 |         |         |        | 333.19  |         |         |        |
| K  |         |         |         |         |        | 147.11  |         |         |        |



#19287468-1 NL: 1.22E5



---

| Reference                          |                     |         |   | P      | Score | Coverage | Accession |     |       |       |
|------------------------------------|---------------------|---------|---|--------|-------|----------|-----------|-----|-------|-------|
| Scan(s)                            | Sequence            | MH+     | z | P      | XC    | DeltaCn  | Sp        | RSp | Ions  | Count |
| IPI:IPI00788824.3 TREMBL:Q567P1;Q5 |                     |         |   | 5e-005 | 10.2  | 0.0      | 0         |     |       |       |
| 19287468 - 1                       | K.YAASSYLSLTPEQWK.S | 1743.86 | 2 | 5e-005 | 3.671 | 0.433    | 421.7     | 1   | 16/42 | 15    |

1 of 1 peptide matches reported, 0 removed due to filtering



DTA for scans: 19287468-1  
Precursor ion: 872.44  
Mass type: mono  
Mod's: (M\* +15.99492) C=161.01468

Ion series for charge: +1

| AA | A ions         | B ions         | B* ions | Bo ions | C ions | Y ions         | Y* ions | Yo ions | Z ions |
|----|----------------|----------------|---------|---------|--------|----------------|---------|---------|--------|
| Y  | 136.08         | 164.07         |         |         |        |                |         |         |        |
| A  | 207.11         | 235.11         |         |         |        | <b>1580.80</b> |         |         |        |
| A  | 278.15         | <b>306.14</b>  |         |         |        | 1509.76        |         |         |        |
| S  | 365.18         | 393.18         |         |         |        | <b>1438.72</b> |         |         |        |
| S  | 452.21         | 480.21         |         |         |        | <b>1351.69</b> |         |         |        |
| Y  | 615.28         | <b>643.27</b>  |         |         |        | <b>1264.66</b> |         |         |        |
| L  | 728.36         | <b>756.36</b>  |         |         |        | <b>1101.59</b> |         |         |        |
| S  | 815.39         | <b>843.39</b>  |         |         |        | <b>988.51</b>  |         |         |        |
| L  | 928.48         | <b>956.47</b>  |         |         |        | <b>901.48</b>  |         |         |        |
| T  | 1029.53        | <b>1057.52</b> |         |         |        | <b>788.39</b>  |         |         |        |
| P  | <b>1126.58</b> | 1154.57        |         |         |        | <b>687.35</b>  |         |         |        |
| E  | 1255.62        | <b>1283.62</b> |         |         |        | <b>590.29</b>  |         |         |        |
| Q  | 1383.68        | <b>1411.67</b> |         |         |        | <b>461.25</b>  |         |         |        |
| W  | 1569.76        | <b>1597.75</b> |         |         |        | <b>333.19</b>  |         |         |        |
| K  |                |                |         |         |        | 147.11         |         |         |        |



#19287468-1 NL: 1.22E5



---

| Reference                          |                     |         |   | P      | Score | Coverage | Accession |     |       |       |
|------------------------------------|---------------------|---------|---|--------|-------|----------|-----------|-----|-------|-------|
| Scan(s)                            | Sequence            | MH+     | z | P      | XC    | DeltaCn  | Sp        | RSp | Ions  | Count |
| IPI:IPI00827875.1 TREMBL:A2MYD2;A2 |                     |         |   | 5e-005 | 10.2  | 0.0      | 0         |     |       |       |
| 19287468 - 1                       | K.YAASSYLSLTPEQWK.S | 1743.86 | 2 | 5e-005 | 3.671 | 0.433    | 421.7     | 1   | 16/42 | 15    |

1 of 1 peptide matches reported, 0 removed due to filtering

DTA for scans: 19287468-1  
Precursor ion: 872.44  
Mass type: mono  
Mod's: (M\* +15.99492) C=161.01468

Ion series for charge: +1

| AA | A ions  | B ions  | B* ions | Bo ions | C ions | Y ions  | Y* ions | Yo ions | Z ions |
|----|---------|---------|---------|---------|--------|---------|---------|---------|--------|
| Y  | 136.08  | 164.07  |         |         |        |         |         |         |        |
| A  | 207.11  | 235.11  |         |         |        | 1580.80 |         |         |        |
| A  | 278.15  | 306.14  |         |         |        | 1509.76 |         |         |        |
| S  | 365.18  | 393.18  |         |         |        | 1438.72 |         |         |        |
| S  | 452.21  | 480.21  |         |         |        | 1351.69 |         |         |        |
| Y  | 615.28  | 643.27  |         |         |        | 1264.66 |         |         |        |
| L  | 728.36  | 756.36  |         |         |        | 1101.59 |         |         |        |
| S  | 815.39  | 843.39  |         |         |        | 988.51  |         |         |        |
| L  | 928.48  | 956.47  |         |         |        | 901.48  |         |         |        |
| T  | 1029.53 | 1057.52 |         |         |        | 788.39  |         |         |        |
| P  | 1126.58 | 1154.57 |         |         |        | 687.35  |         |         |        |
| E  | 1255.62 | 1283.62 |         |         |        | 590.29  |         |         |        |
| Q  | 1383.68 | 1411.67 |         |         |        | 461.25  |         |         |        |
| W  | 1569.76 | 1597.75 |         |         |        | 333.19  |         |         |        |
| K  |         |         |         |         |        | 147.11  |         |         |        |



#19287468-1 NL: 1.22E5



---

| Reference                          |                     |         |   | P      | Score | Coverage | Accession |     |       |       |
|------------------------------------|---------------------|---------|---|--------|-------|----------|-----------|-----|-------|-------|
| Scan(s)                            | Sequence            | MH+     | z | P      | XC    | DeltaCn  | Sp        | RSp | Ions  | Count |
| IPI:IPI00829640.1 TREMBL:Q6GMW4 Ta |                     |         |   | 5e-005 | 10.2  | 0.0      | 0         |     |       |       |
| 19287468 - 1                       | K.YAASSYLSLTPEQWK.S | 1743.86 | 2 | 5e-005 | 3.671 | 0.433    | 421.7     | 1   | 16/42 | 15    |

1 of 1 peptide matches reported, 0 removed due to filtering

DTA for scans: 19287468-1  
Precursor ion: 872.44  
Mass type: mono  
Mod's: (M\* +15.99492) C=161.01468

Ion series for charge: +1

| AA | A ions  | B ions  | B* ions | Bo ions | C ions | Y ions  | Y* ions | Yo ions | Z ions |
|----|---------|---------|---------|---------|--------|---------|---------|---------|--------|
| Y  | 136.08  | 164.07  |         |         |        |         |         |         |        |
| A  | 207.11  | 235.11  |         |         |        | 1580.80 |         |         |        |
| A  | 278.15  | 306.14  |         |         |        | 1509.76 |         |         |        |
| S  | 365.18  | 393.18  |         |         |        | 1438.72 |         |         |        |
| S  | 452.21  | 480.21  |         |         |        | 1351.69 |         |         |        |
| Y  | 615.28  | 643.27  |         |         |        | 1264.66 |         |         |        |
| L  | 728.36  | 756.36  |         |         |        | 1101.59 |         |         |        |
| S  | 815.39  | 843.39  |         |         |        | 988.51  |         |         |        |
| L  | 928.48  | 956.47  |         |         |        | 901.48  |         |         |        |
| T  | 1029.53 | 1057.52 |         |         |        | 788.39  |         |         |        |
| P  | 1126.58 | 1154.57 |         |         |        | 687.35  |         |         |        |
| E  | 1255.62 | 1283.62 |         |         |        | 590.29  |         |         |        |
| Q  | 1383.68 | 1411.67 |         |         |        | 461.25  |         |         |        |
| W  | 1569.76 | 1597.75 |         |         |        | 333.19  |         |         |        |
| K  |         |         |         |         |        | 147.11  |         |         |        |



#19287468-1 NL: 1.22E5





---

| Reference                          |                     |         |   | P      | Score | Coverage | Accession |     |       |       |
|------------------------------------|---------------------|---------|---|--------|-------|----------|-----------|-----|-------|-------|
| Scan(s)                            | Sequence            | MH+     | z | P      | XC    | DeltaCn  | Sp        | RSp | Ions  | Count |
| IPI:IPI00830047.1 TREMBL:A6NKU1 EN |                     |         |   | 5e-005 | 10.2  | 0.0      | 0         |     |       |       |
| 19287468 - 1                       | K.YAASSYLSLTPEQWK.S | 1743.86 | 2 | 5e-005 | 3.671 | 0.433    | 421.7     | 1   | 16/42 | 15    |

1 of 1 peptide matches reported, 0 removed due to filtering

DTA for scans: 19287468-1  
Precursor ion: 872.44  
Mass type: mono  
Mod's: (M\* +15.99492) C=161.01468

Ion series for charge: +1

| AA | A ions  | B ions  | B* ions | Bo ions | C ions | Y ions  | Y* ions | Yo ions | Z ions |
|----|---------|---------|---------|---------|--------|---------|---------|---------|--------|
| Y  | 136.08  | 164.07  |         |         |        |         |         |         |        |
| A  | 207.11  | 235.11  |         |         |        | 1580.80 |         |         |        |
| A  | 278.15  | 306.14  |         |         |        | 1509.76 |         |         |        |
| S  | 365.18  | 393.18  |         |         |        | 1438.72 |         |         |        |
| S  | 452.21  | 480.21  |         |         |        | 1351.69 |         |         |        |
| Y  | 615.28  | 643.27  |         |         |        | 1264.66 |         |         |        |
| L  | 728.36  | 756.36  |         |         |        | 1101.59 |         |         |        |
| S  | 815.39  | 843.39  |         |         |        | 988.51  |         |         |        |
| L  | 928.48  | 956.47  |         |         |        | 901.48  |         |         |        |
| T  | 1029.53 | 1057.52 |         |         |        | 788.39  |         |         |        |
| P  | 1126.58 | 1154.57 |         |         |        | 687.35  |         |         |        |
| E  | 1255.62 | 1283.62 |         |         |        | 590.29  |         |         |        |
| Q  | 1383.68 | 1411.67 |         |         |        | 461.25  |         |         |        |
| W  | 1569.76 | 1597.75 |         |         |        | 333.19  |         |         |        |
| K  |         |         |         |         |        | 147.11  |         |         |        |



#19287468-1 NL: 1.22E5



---

| Reference                          |                     |         |   | P      | Score | Coverage | Accession |     |       |       |
|------------------------------------|---------------------|---------|---|--------|-------|----------|-----------|-----|-------|-------|
| Scan(s)                            | Sequence            | MH+     | z | P      | XC    | DeltaCn  | Sp        | RSp | Ions  | Count |
| IPI:IPI00852577.2 TREMBL:A0M8Q9 EN |                     |         |   | 5e-005 | 10.2  | 0.0      | 0         |     |       |       |
| 19287468 - 1                       | K.YAASSYLSLTPEQWK.S | 1743.86 | 2 | 5e-005 | 3.671 | 0.433    | 421.7     | 1   | 16/42 | 15    |

1 of 1 peptide matches reported, 0 removed due to filtering

DTA for scans: 19287468-1  
Precursor ion: 872.44  
Mass type: mono  
Mod's: (M\* +15.99492) C=161.01468

Ion series for charge: +1

| AA | A ions  | B ions  | B* ions | Bo ions | C ions | Y ions  | Y* ions | Yo ions | Z ions |
|----|---------|---------|---------|---------|--------|---------|---------|---------|--------|
| Y  | 136.08  | 164.07  |         |         |        |         |         |         |        |
| A  | 207.11  | 235.11  |         |         |        | 1580.80 |         |         |        |
| A  | 278.15  | 306.14  |         |         |        | 1509.76 |         |         |        |
| S  | 365.18  | 393.18  |         |         |        | 1438.72 |         |         |        |
| S  | 452.21  | 480.21  |         |         |        | 1351.69 |         |         |        |
| Y  | 615.28  | 643.27  |         |         |        | 1264.66 |         |         |        |
| L  | 728.36  | 756.36  |         |         |        | 1101.59 |         |         |        |
| S  | 815.39  | 843.39  |         |         |        | 988.51  |         |         |        |
| L  | 928.48  | 956.47  |         |         |        | 901.48  |         |         |        |
| T  | 1029.53 | 1057.52 |         |         |        | 788.39  |         |         |        |
| P  | 1126.58 | 1154.57 |         |         |        | 687.35  |         |         |        |
| E  | 1255.62 | 1283.62 |         |         |        | 590.29  |         |         |        |
| Q  | 1383.68 | 1411.67 |         |         |        | 461.25  |         |         |        |
| W  | 1569.76 | 1597.75 |         |         |        | 333.19  |         |         |        |
| K  |         |         |         |         |        | 147.11  |         |         |        |



#19287468-1 NL: 1.22E5



---

| Reference                          |                     |         |   | P      | Score | Coverage | Accession |     |       |       |
|------------------------------------|---------------------|---------|---|--------|-------|----------|-----------|-----|-------|-------|
| Scan(s)                            | Sequence            | MH+     | z | P      | XC    | DeltaCn  | Sp        | RSp | Ions  | Count |
| IPI:IPI00887169.2 TREMBL:A2MYD0;A2 |                     |         |   | 5e-005 | 10.2  | 0.0      | 0         |     |       |       |
| 19287468 - 1                       | K.YAASSYLSLTPEQWK.S | 1743.86 | 2 | 5e-005 | 3.671 | 0.433    | 421.7     | 1   | 16/42 | 15    |

1 of 1 peptide matches reported, 0 removed due to filtering

DTA for scans: 19287468-1  
Precursor ion: 872.44  
Mass type: mono  
Mod's: (M\* +15.99492) C=161.01468

Ion series for charge: +1

| AA | A ions  | B ions  | B* ions | Bo ions | C ions | Y ions  | Y* ions | Yo ions | Z ions |
|----|---------|---------|---------|---------|--------|---------|---------|---------|--------|
| Y  | 136.08  | 164.07  |         |         |        |         |         |         |        |
| A  | 207.11  | 235.11  |         |         |        | 1580.80 |         |         |        |
| A  | 278.15  | 306.14  |         |         |        | 1509.76 |         |         |        |
| S  | 365.18  | 393.18  |         |         |        | 1438.72 |         |         |        |
| S  | 452.21  | 480.21  |         |         |        | 1351.69 |         |         |        |
| Y  | 615.28  | 643.27  |         |         |        | 1264.66 |         |         |        |
| L  | 728.36  | 756.36  |         |         |        | 1101.59 |         |         |        |
| S  | 815.39  | 843.39  |         |         |        | 988.51  |         |         |        |
| L  | 928.48  | 956.47  |         |         |        | 901.48  |         |         |        |
| T  | 1029.53 | 1057.52 |         |         |        | 788.39  |         |         |        |
| P  | 1126.58 | 1154.57 |         |         |        | 687.35  |         |         |        |
| E  | 1255.62 | 1283.62 |         |         |        | 590.29  |         |         |        |
| Q  | 1383.68 | 1411.67 |         |         |        | 461.25  |         |         |        |
| W  | 1569.76 | 1597.75 |         |         |        | 333.19  |         |         |        |
| K  |         |         |         |         |        | 147.11  |         |         |        |





#19287468-1 NL: 1.22E5



---

| Reference                          |                     |         |   | P      | Score | Coverage | Accession |     |       |       |
|------------------------------------|---------------------|---------|---|--------|-------|----------|-----------|-----|-------|-------|
| Scan(s)                            | Sequence            | MH+     | z | P      | XC    | DeltaCn  | Sp        | RSp | Ions  | Count |
| IPI:IPI00893178.1 ENSEMBL:ENSP0000 |                     |         |   | 5e-005 | 10.2  | 0.0      | 0         |     |       |       |
| 19287468 - 1                       | K.YAASSYLSLTPEQWK.S | 1743.86 | 2 | 5e-005 | 3.671 | 0.433    | 421.7     | 1   | 16/42 | 15    |

1 of 1 peptide matches reported, 0 removed due to filtering

DTA for scans: 19287468-1  
Precursor ion: 872.44  
Mass type: mono  
Mod's: (M\* +15.99492) C=161.01468

Ion series for charge: +1

| AA | A ions  | B ions  | B* ions | Bo ions | C ions | Y ions  | Y* ions | Yo ions | Z ions |
|----|---------|---------|---------|---------|--------|---------|---------|---------|--------|
| Y  | 136.08  | 164.07  |         |         |        |         |         |         |        |
| A  | 207.11  | 235.11  |         |         |        | 1580.80 |         |         |        |
| A  | 278.15  | 306.14  |         |         |        | 1509.76 |         |         |        |
| S  | 365.18  | 393.18  |         |         |        | 1438.72 |         |         |        |
| S  | 452.21  | 480.21  |         |         |        | 1351.69 |         |         |        |
| Y  | 615.28  | 643.27  |         |         |        | 1264.66 |         |         |        |
| L  | 728.36  | 756.36  |         |         |        | 1101.59 |         |         |        |
| S  | 815.39  | 843.39  |         |         |        | 988.51  |         |         |        |
| L  | 928.48  | 956.47  |         |         |        | 901.48  |         |         |        |
| T  | 1029.53 | 1057.52 |         |         |        | 788.39  |         |         |        |
| P  | 1126.58 | 1154.57 |         |         |        | 687.35  |         |         |        |
| E  | 1255.62 | 1283.62 |         |         |        | 590.29  |         |         |        |
| Q  | 1383.68 | 1411.67 |         |         |        | 461.25  |         |         |        |
| W  | 1569.76 | 1597.75 |         |         |        | 333.19  |         |         |        |
| K  |         |         |         |         |        | 147.11  |         |         |        |



#19287468-1 NL: 1.22E5



---

| Reference                                                      |          |         |   | P      | Score | Coverage | Accession |     |       |       |
|----------------------------------------------------------------|----------|---------|---|--------|-------|----------|-----------|-----|-------|-------|
| Scan(s)                                                        | Sequence | MH+     | z | P      | XC    | DeltaCn  | Sp        | RSp | Ions  | Count |
| IPI:IPI00026197.7 SWISS-PROT:P06312 ENSEMBL:ENSP00000374778 H- |          |         |   | 5e-005 | 10.2  | 0.0      | 0         |     |       |       |
| 2118291816 - K.LLIYWASTR.E                                     |          | 1122.63 | 2 | 5e-005 | 3.929 | 0.542    | 1464.4    | 1   | 19/24 | 4     |

1 of 1 peptide matches reported, 0 removed due to filtering

DTA for scans: 2118291816-26226248  
Precursor ion: 561.82  
Mass type: mono  
Mod's: (M\* +15.99492) C=161.01468

Ion series for charge: +1

| AA | A ions        | B ions        | B* ions | Bo ions | C ions | Y ions         | Y* ions | Yo ions | Z ions |
|----|---------------|---------------|---------|---------|--------|----------------|---------|---------|--------|
| L  | 86.10         | 114.09        |         |         |        |                |         |         |        |
| L  | <b>199.18</b> | <b>227.18</b> |         |         |        | <b>1009.55</b> |         |         |        |
| I  | 312.26        | <b>340.26</b> |         |         |        | <b>896.46</b>  |         |         |        |
| Y  | <b>475.33</b> | <b>503.32</b> |         |         |        | <b>783.38</b>  |         |         |        |
| W  | <b>661.41</b> | <b>689.40</b> |         |         |        | <b>620.32</b>  |         |         |        |
| A  | 732.44        | <b>760.44</b> |         |         |        | <b>434.24</b>  |         |         |        |
| S  | 819.48        | <b>847.47</b> |         |         |        | <b>363.20</b>  |         |         |        |
| T  | 920.52        | <b>948.52</b> |         |         |        | <b>276.17</b>  |         |         |        |
| R  |               |               |         |         |        | <b>175.12</b>  |         |         |        |

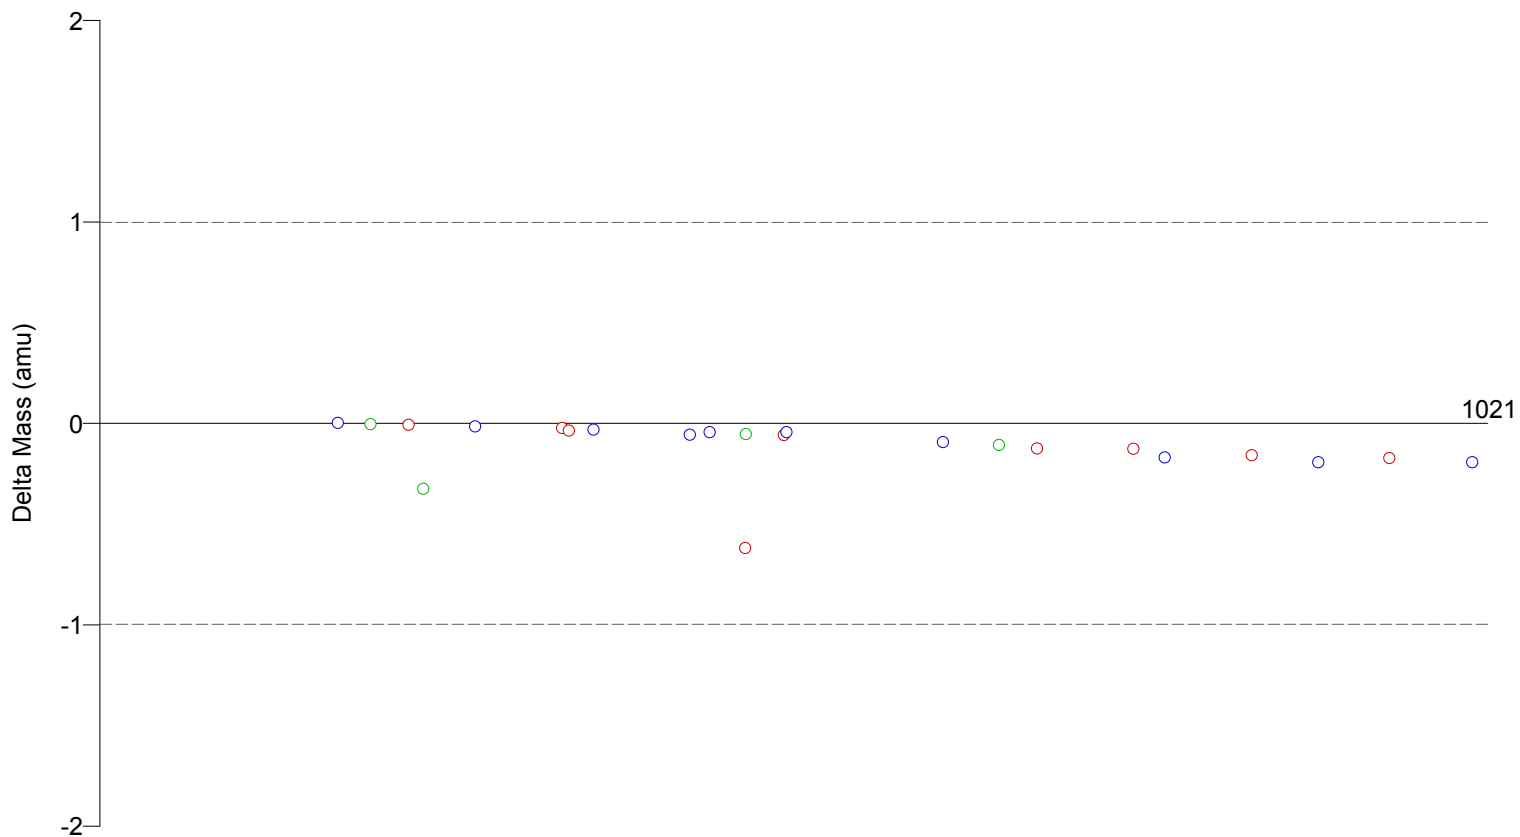

#2118291816-26226248 NL: 1.43E5

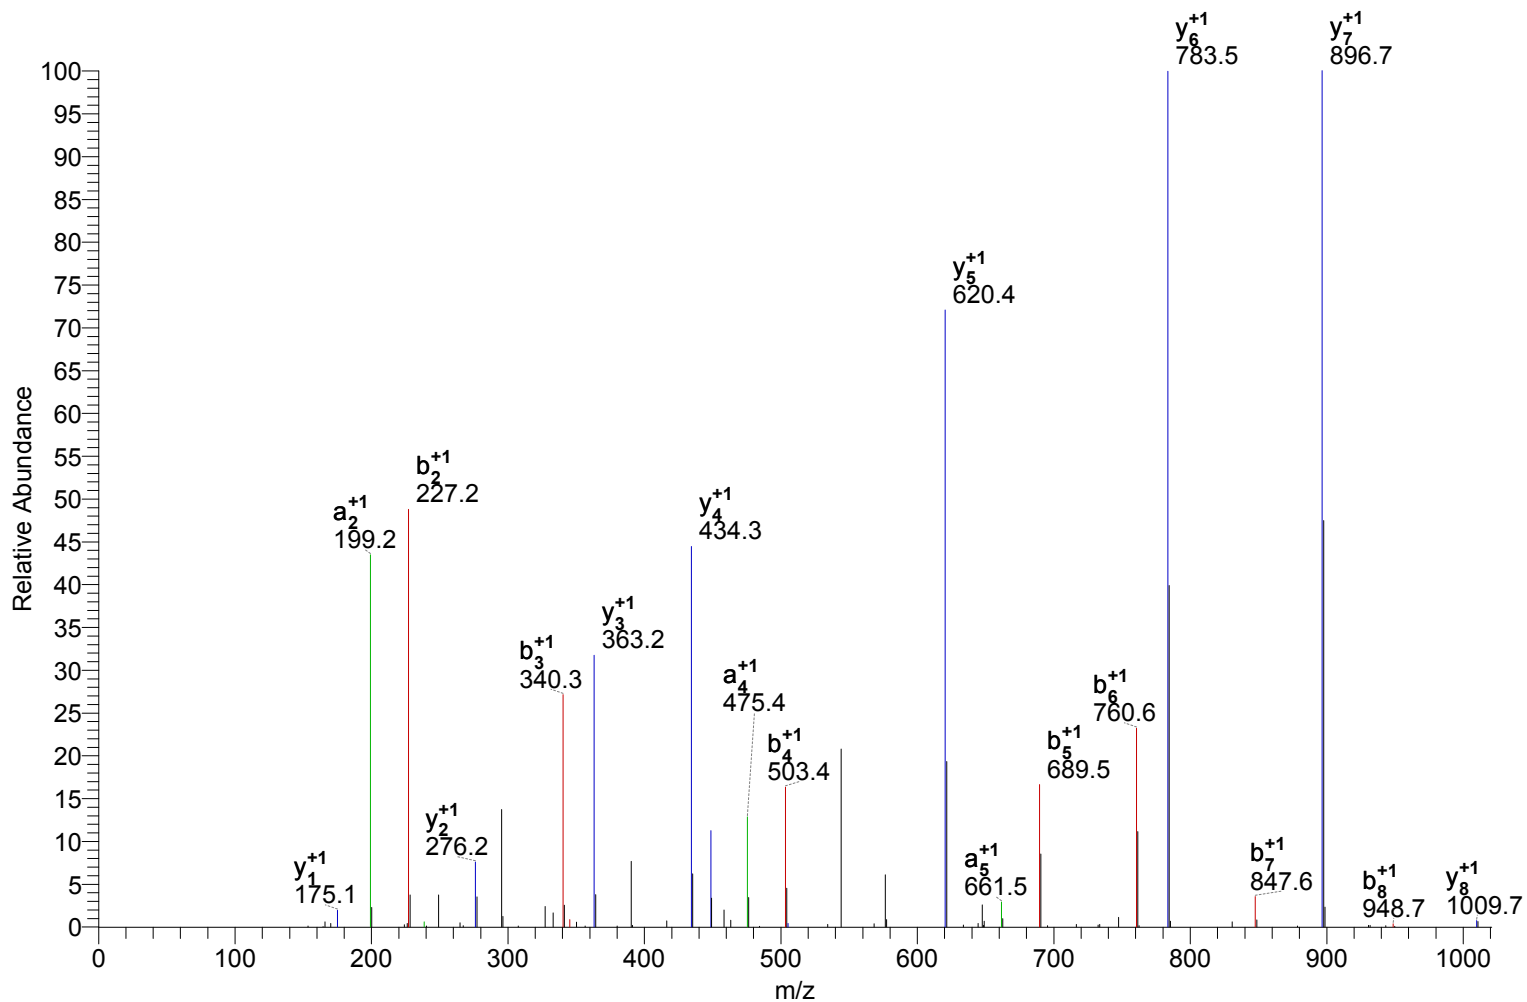

---

| Reference                          |          |         |   | P      | Score | Coverage | Accession |     |       |       |
|------------------------------------|----------|---------|---|--------|-------|----------|-----------|-----|-------|-------|
| Scan(s)                            | Sequence | MH+     | z | P      | XC    | DeltaCn  | Sp        | RSp | Ions  | Count |
| IPI:IPI00385143.1 TREMBL:Q9NP29 Ta |          |         |   | 5e-005 | 10.2  | 0.0      |           | 0   |       |       |
| 2118291816 - K.LLIYWASTR.E         |          | 1122.63 | 2 | 5e-005 | 3.929 | 0.542    | 1464.4    | 1   | 19/24 | 4     |

1 of 1 peptide matches reported, 0 removed due to filtering



DTA for scans: 2118291816-26226248  
Precursor ion: 561.82  
Mass type: mono  
Mod's: (M\* +15.99492) C=161.01468

Ion series for charge: +1

| AA | A ions        | B ions        | B* ions | Bo ions | C ions | Y ions         | Y* ions | Yo ions | Z ions |
|----|---------------|---------------|---------|---------|--------|----------------|---------|---------|--------|
| L  | 86.10         | 114.09        |         |         |        |                |         |         |        |
| L  | <b>199.18</b> | <b>227.18</b> |         |         |        | <b>1009.55</b> |         |         |        |
| I  | 312.26        | <b>340.26</b> |         |         |        | <b>896.46</b>  |         |         |        |
| Y  | <b>475.33</b> | <b>503.32</b> |         |         |        | <b>783.38</b>  |         |         |        |
| W  | <b>661.41</b> | <b>689.40</b> |         |         |        | <b>620.32</b>  |         |         |        |
| A  | 732.44        | <b>760.44</b> |         |         |        | <b>434.24</b>  |         |         |        |
| S  | 819.48        | <b>847.47</b> |         |         |        | <b>363.20</b>  |         |         |        |
| T  | 920.52        | <b>948.52</b> |         |         |        | <b>276.17</b>  |         |         |        |
| R  |               |               |         |         |        | <b>175.12</b>  |         |         |        |



#2118291816-26226248 NL: 1.43E5



---

| Reference                          |               |         |   | P      | Score | Coverage | Accession |     |       |       |
|------------------------------------|---------------|---------|---|--------|-------|----------|-----------|-----|-------|-------|
| Scan(s)                            | Sequence      | MH+     | z | P      | XC    | DeltaCn  | Sp        | RSp | Ions  | Count |
| IPI:IPI00386132.1 SWISS-PROT:P0631 |               |         |   | 5e-005 | 10.2  | 0.0      | 0         |     |       |       |
| 2118291816 -                       | K.LLIYWASTR.E | 1122.63 | 2 | 5e-005 | 3.929 | 0.542    | 1464.4    | 1   | 19/24 | 4     |

1 of 1 peptide matches reported, 0 removed due to filtering

DTA for scans: 2118291816-26226248  
Precursor ion: 561.82  
Mass type: mono  
Mod's: (M\* +15.99492) C=161.01468

Ion series for charge: +1

| AA | A ions        | B ions        | B* ions | Bo ions | C ions | Y ions         | Y* ions | Yo ions | Z ions |
|----|---------------|---------------|---------|---------|--------|----------------|---------|---------|--------|
| L  | 86.10         | 114.09        |         |         |        |                |         |         |        |
| L  | <b>199.18</b> | <b>227.18</b> |         |         |        | <b>1009.55</b> |         |         |        |
| I  | 312.26        | <b>340.26</b> |         |         |        | <b>896.46</b>  |         |         |        |
| Y  | <b>475.33</b> | <b>503.32</b> |         |         |        | <b>783.38</b>  |         |         |        |
| W  | <b>661.41</b> | <b>689.40</b> |         |         |        | <b>620.32</b>  |         |         |        |
| A  | 732.44        | <b>760.44</b> |         |         |        | <b>434.24</b>  |         |         |        |
| S  | 819.48        | <b>847.47</b> |         |         |        | <b>363.20</b>  |         |         |        |
| T  | 920.52        | <b>948.52</b> |         |         |        | <b>276.17</b>  |         |         |        |
| R  |               |               |         |         |        | <b>175.12</b>  |         |         |        |



#2118291816-26226248 NL: 1.43E5



---

| Reference                          |               |         |   | P      | Score | Coverage | Accession |     |       |       |
|------------------------------------|---------------|---------|---|--------|-------|----------|-----------|-----|-------|-------|
| Scan(s)                            | Sequence      | MH+     | z | P      | XC    | DeltaCn  | Sp        | RSp | Ions  | Count |
| IPI:IPI00386133.1 SWISS-PROT:P0631 |               |         |   | 5e-005 | 10.2  | 0.0      | 0         |     |       |       |
| 2118291816 -                       | K.LLIYWASTR.E | 1122.63 | 2 | 5e-005 | 3.929 | 0.542    | 1464.4    | 1   | 19/24 | 4     |

1 of 1 peptide matches reported, 0 removed due to filtering

DTA for scans: 2118291816-26226248  
Precursor ion: 561.82  
Mass type: mono  
Mod's: (M\* +15.99492) C=161.01468

Ion series for charge: +1

| AA | A ions        | B ions        | B* ions | Bo ions | C ions | Y ions         | Y* ions | Yo ions | Z ions |
|----|---------------|---------------|---------|---------|--------|----------------|---------|---------|--------|
| L  | 86.10         | 114.09        |         |         |        |                |         |         |        |
| L  | <b>199.18</b> | <b>227.18</b> |         |         |        | <b>1009.55</b> |         |         |        |
| I  | 312.26        | <b>340.26</b> |         |         |        | <b>896.46</b>  |         |         |        |
| Y  | <b>475.33</b> | <b>503.32</b> |         |         |        | <b>783.38</b>  |         |         |        |
| W  | <b>661.41</b> | <b>689.40</b> |         |         |        | <b>620.32</b>  |         |         |        |
| A  | 732.44        | <b>760.44</b> |         |         |        | <b>434.24</b>  |         |         |        |
| S  | 819.48        | <b>847.47</b> |         |         |        | <b>363.20</b>  |         |         |        |
| T  | 920.52        | <b>948.52</b> |         |         |        | <b>276.17</b>  |         |         |        |
| R  |               |               |         |         |        | <b>175.12</b>  |         |         |        |



#2118291816-26226248 NL: 1.43E5





---

| Reference                          |          |         |   | P      | Score | Coverage | Accession |     |       |       |
|------------------------------------|----------|---------|---|--------|-------|----------|-----------|-----|-------|-------|
| Scan(s)                            | Sequence | MH+     | z | P      | XC    | DeltaCn  | Sp        | RSp | Ions  | Count |
| IPI:IPI00387120.1 SWISS-PROT:P0162 |          |         |   | 5e-005 | 10.2  | 0.0      | 0         |     |       |       |
| 2118291816 - K.LLIYWASTR.E         |          | 1122.63 | 2 | 5e-005 | 3.929 | 0.542    | 1464.4    | 1   | 19/24 | 4     |

1 of 1 peptide matches reported, 0 removed due to filtering

DTA for scans: 2118291816-26226248  
Precursor ion: 561.82  
Mass type: mono  
Mod's: (M\* +15.99492) C=161.01468

Ion series for charge: +1

| AA | A ions        | B ions        | B* ions | Bo ions | C ions | Y ions         | Y* ions | Yo ions | Z ions |
|----|---------------|---------------|---------|---------|--------|----------------|---------|---------|--------|
| L  | 86.10         | 114.09        |         |         |        |                |         |         |        |
| L  | <b>199.18</b> | <b>227.18</b> |         |         |        | <b>1009.55</b> |         |         |        |
| I  | 312.26        | <b>340.26</b> |         |         |        | <b>896.46</b>  |         |         |        |
| Y  | <b>475.33</b> | <b>503.32</b> |         |         |        | <b>783.38</b>  |         |         |        |
| W  | <b>661.41</b> | <b>689.40</b> |         |         |        | <b>620.32</b>  |         |         |        |
| A  | 732.44        | <b>760.44</b> |         |         |        | <b>434.24</b>  |         |         |        |
| S  | 819.48        | <b>847.47</b> |         |         |        | <b>363.20</b>  |         |         |        |
| T  | 920.52        | <b>948.52</b> |         |         |        | <b>276.17</b>  |         |         |        |
| R  |               |               |         |         |        | <b>175.12</b>  |         |         |        |



#2118291816-26226248 NL: 1.43E5



---

| Reference                          |                 |         |   | P      | Score | Coverage | Accession |     |       |       |
|------------------------------------|-----------------|---------|---|--------|-------|----------|-----------|-----|-------|-------|
| Scan(s)                            | Sequence        | MH+     | z | P      | XC    | DeltaCn  | Sp        | RSp | Ions  | Count |
| IPI:IPI00029739.5 SWISS-PROT:P0860 |                 |         |   | 5e-005 | 20.2  | 0.0      |           | 0   |       |       |
| 19287468 - 1                       | R.RPYFPVAVGK.Y  | 1133.65 | 2 | 0.02   | 3.852 | 0.322    | 1065.5    | 1   | 18/27 | 6     |
| 19287468 - 1                       | R.EIMENYNIALR.W | 1365.68 | 2 | 5e-005 | 3.298 | 0.403    | 992.9     | 1   | 18/30 | 3     |

2 of 2 peptide matches reported, 0 removed due to filtering

DTA for scans: 19287468-1  
Precursor ion: 567.33  
Mass type: mono  
Mod's: (M\* +15.99492) C=161.01468

Ion series for charge: +1

| AA | A ions        | B ions        | B* ions | Bo ions | C ions | Y ions        | Y* ions | Yo ions | Z ions |
|----|---------------|---------------|---------|---------|--------|---------------|---------|---------|--------|
| R  | 129.11        | 157.11        |         |         |        |               |         |         |        |
| P  | 226.17        | <b>254.16</b> |         |         |        | <b>977.55</b> |         |         |        |
| Y  | 389.23        | <b>417.22</b> |         |         |        | <b>880.49</b> |         |         |        |
| F  | <b>536.30</b> | 564.29        |         |         |        | <b>717.43</b> |         |         |        |
| P  | 633.35        | 661.35        |         |         |        | <b>570.36</b> |         |         |        |
| V  | <b>732.42</b> | <b>760.41</b> |         |         |        | 473.31        |         |         |        |
| A  | <b>803.46</b> | <b>831.45</b> |         |         |        | <b>374.24</b> |         |         |        |
| V  | <b>902.52</b> | <b>930.52</b> |         |         |        | <b>303.20</b> |         |         |        |
| G  | 959.55        | <b>987.54</b> |         |         |        | <b>204.13</b> |         |         |        |
| K  |               |               |         |         |        | 147.11        |         |         |        |

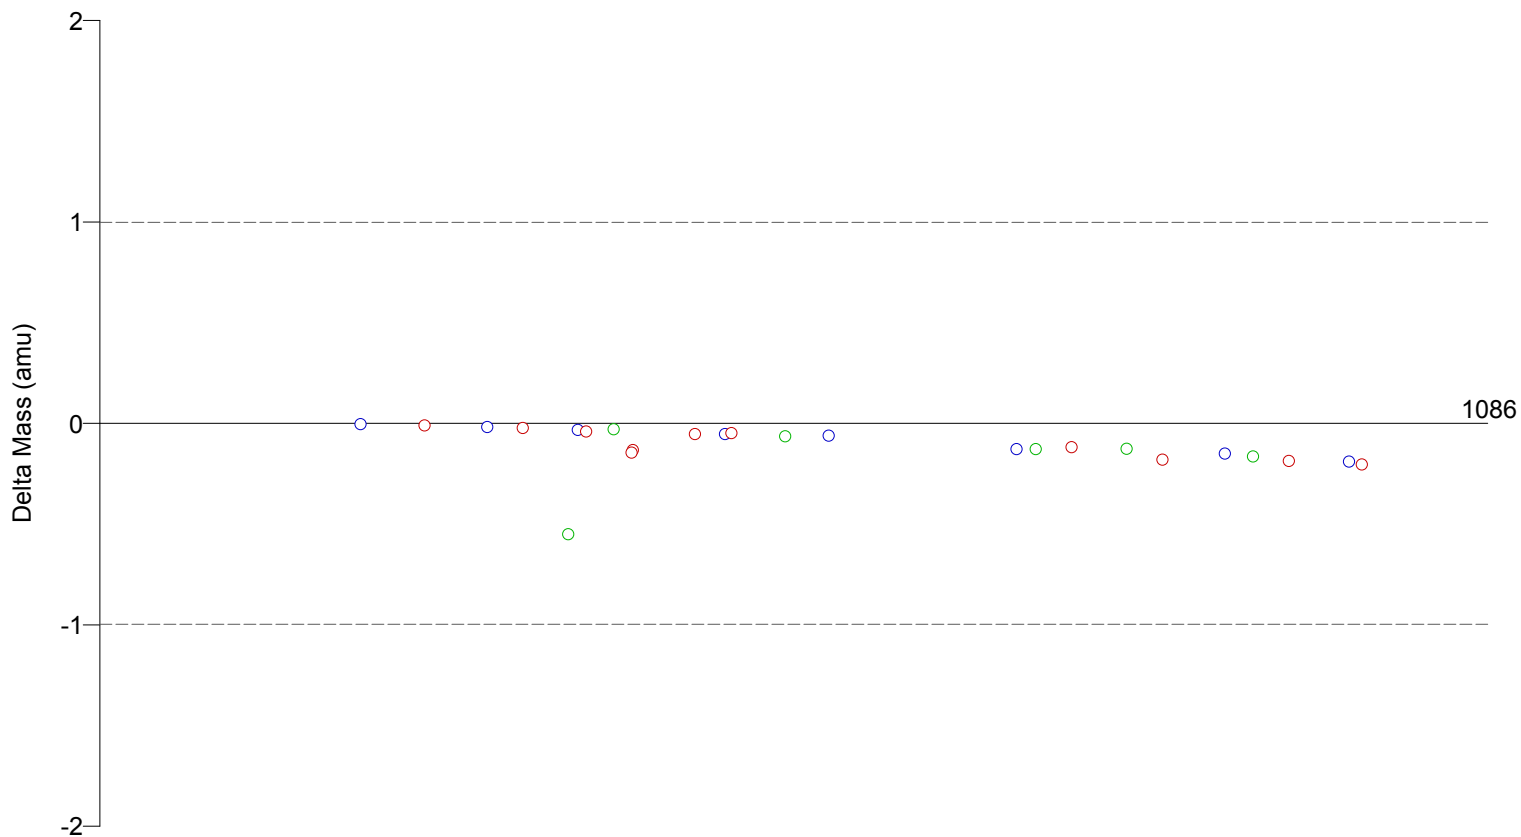

#19287468-1 NL: 2.96E5

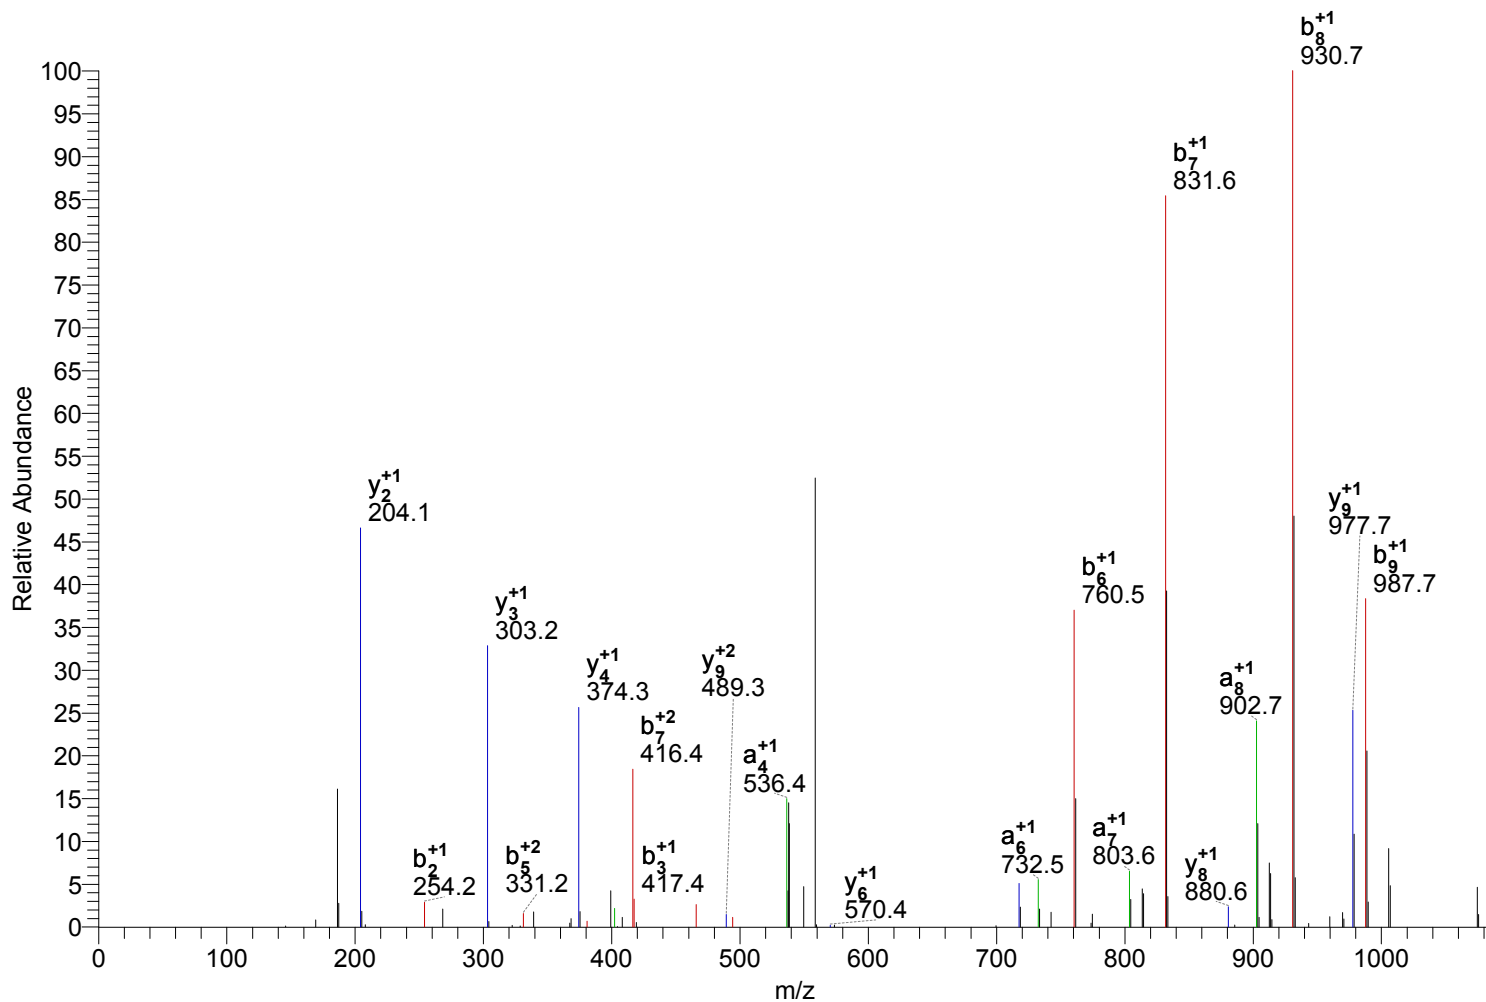

DTA for scans: 19287468-1  
Precursor ion: 683.35  
Mass type: mono  
Mod's: (M\* +15.99492) C=161.01468

Ion series for charge: +1

| AA | A ions        | B ions         | B* ions | Bo ions | C ions | Y ions         | Y* ions | Yo ions | Z ions |
|----|---------------|----------------|---------|---------|--------|----------------|---------|---------|--------|
| E  | 102.05        | 130.05         |         |         |        |                |         |         |        |
| I  | <b>215.14</b> | <b>243.13</b>  |         |         |        | 1236.64        |         |         |        |
| M  | 346.18        | <b>374.17</b>  |         |         |        | <b>1123.56</b> |         |         |        |
| E  | 475.22        | <b>503.22</b>  |         |         |        | <b>992.52</b>  |         |         |        |
| N  | 589.27        | <b>617.26</b>  |         |         |        | <b>863.47</b>  |         |         |        |
| Y  | 752.33        | <b>780.32</b>  |         |         |        | <b>749.43</b>  |         |         |        |
| N  | 866.37        | <b>894.37</b>  |         |         |        | <b>586.37</b>  |         |         |        |
| I  | 979.46        | <b>1007.45</b> |         |         |        | <b>472.32</b>  |         |         |        |
| A  | 1050.49       | <b>1078.49</b> |         |         |        | <b>359.24</b>  |         |         |        |
| L  | 1163.58       | <b>1191.57</b> |         |         |        | <b>288.20</b>  |         |         |        |
| R  |               |                |         |         |        | 175.12         |         |         |        |

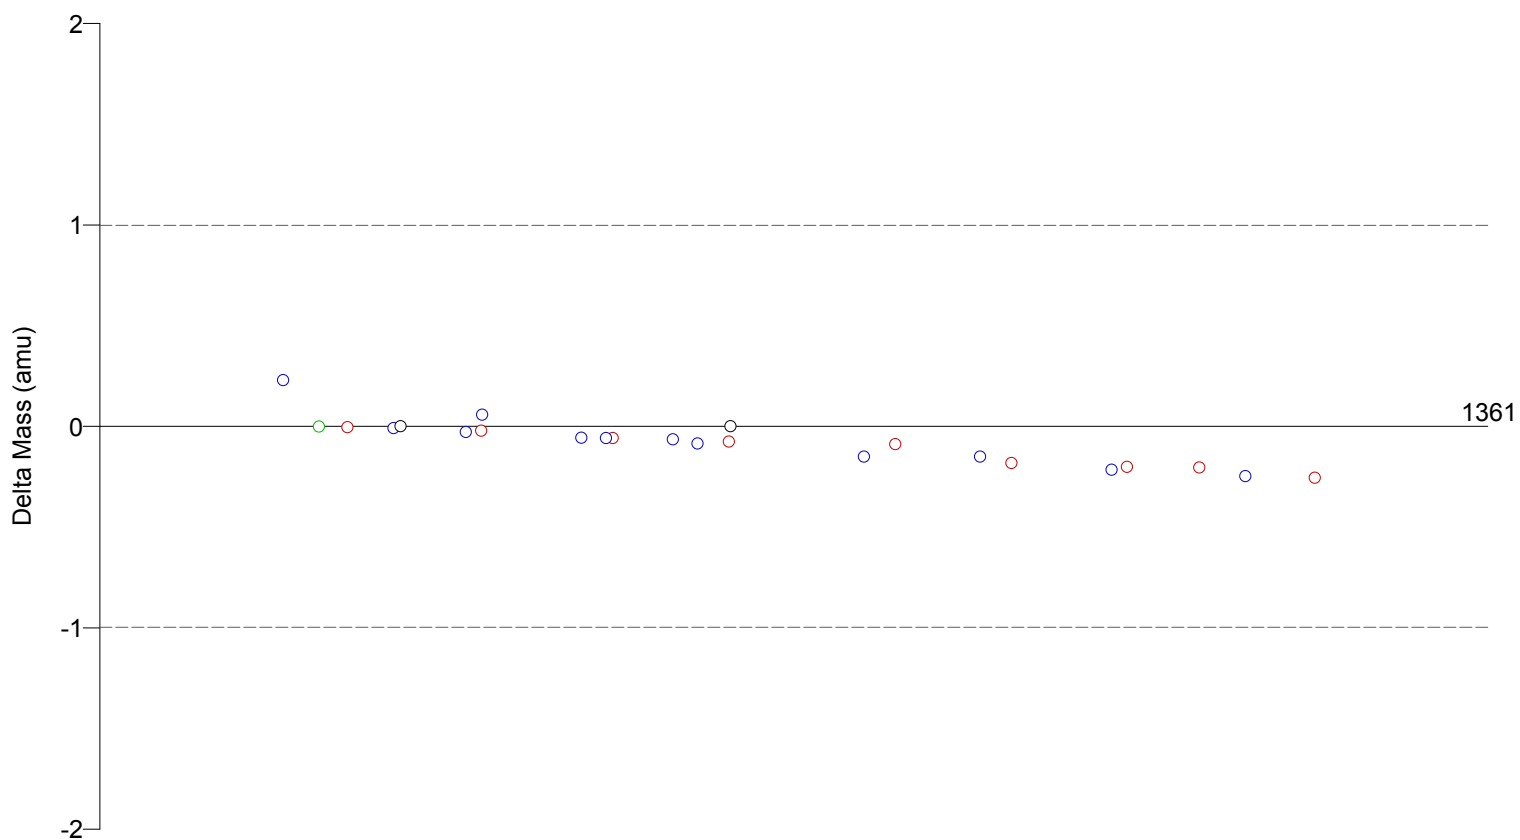

#19287468-1 NL: 1.28E5

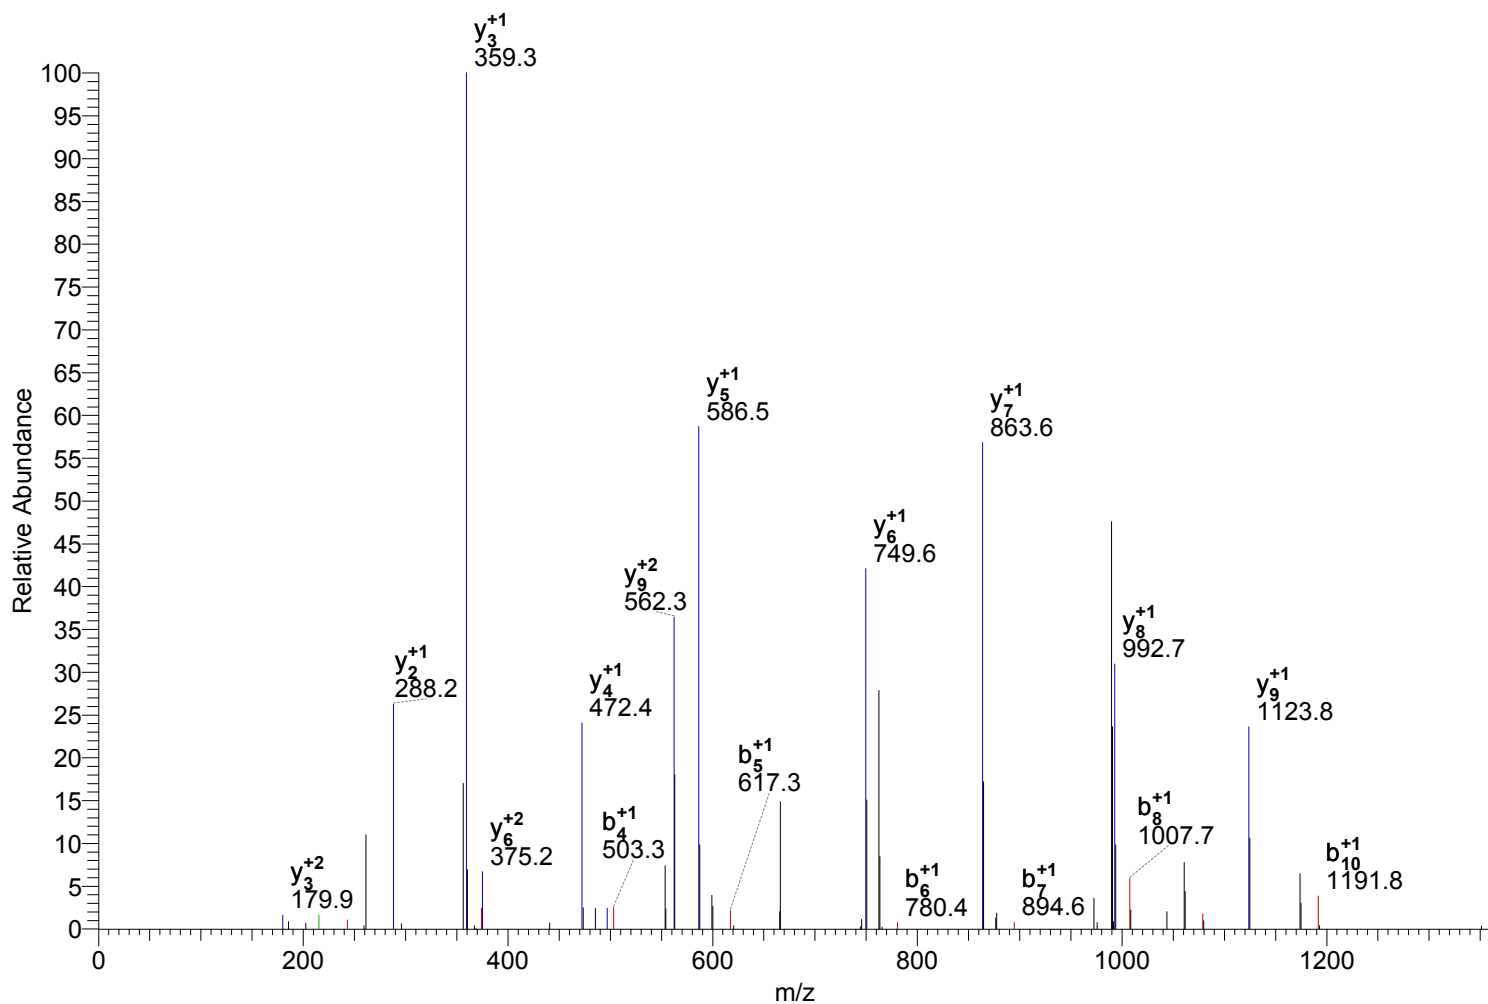



---

| Reference                                                      |                 |         |   | P      | Score | Coverage | Accession |     |       |       |
|----------------------------------------------------------------|-----------------|---------|---|--------|-------|----------|-----------|-----|-------|-------|
| Scan(s)                                                        | Sequence        | MH+     | z | P      | XC    | DeltaCn  | Sp        | RSp | Ions  | Count |
| IPI:IPI00011264.2 SWISS-PROT:Q03591 ENSEMBL:ENSP00000314299 RE |                 |         |   | 5e-005 | 10.2  | 0.0      | 0         |     |       |       |
| 19287468 - 1                                                   | R.EIMENYNIALR.W | 1365.68 | 2 | 5e-005 | 3.298 | 0.403    | 992.9     | 1   | 18/30 | 3     |

1 of 1 peptide matches reported, 0 removed due to filtering

DTA for scans: 19287468-1  
Precursor ion: 683.35  
Mass type: mono  
Mod's: (M\* +15.99492) C=161.01468

Ion series for charge: +1

| AA | A ions        | B ions         | B* ions | Bo ions | C ions | Y ions         | Y* ions | Yo ions | Z ions |
|----|---------------|----------------|---------|---------|--------|----------------|---------|---------|--------|
| E  | 102.05        | 130.05         |         |         |        |                |         |         |        |
| I  | <b>215.14</b> | <b>243.13</b>  |         |         |        | 1236.64        |         |         |        |
| M  | 346.18        | <b>374.17</b>  |         |         |        | <b>1123.56</b> |         |         |        |
| E  | 475.22        | <b>503.22</b>  |         |         |        | <b>992.52</b>  |         |         |        |
| N  | 589.27        | <b>617.26</b>  |         |         |        | <b>863.47</b>  |         |         |        |
| Y  | 752.33        | <b>780.32</b>  |         |         |        | <b>749.43</b>  |         |         |        |
| N  | 866.37        | <b>894.37</b>  |         |         |        | <b>586.37</b>  |         |         |        |
| I  | 979.46        | <b>1007.45</b> |         |         |        | <b>472.32</b>  |         |         |        |
| A  | 1050.49       | <b>1078.49</b> |         |         |        | <b>359.24</b>  |         |         |        |
| L  | 1163.58       | <b>1191.57</b> |         |         |        | <b>288.20</b>  |         |         |        |
| R  |               |                |         |         |        | 175.12         |         |         |        |

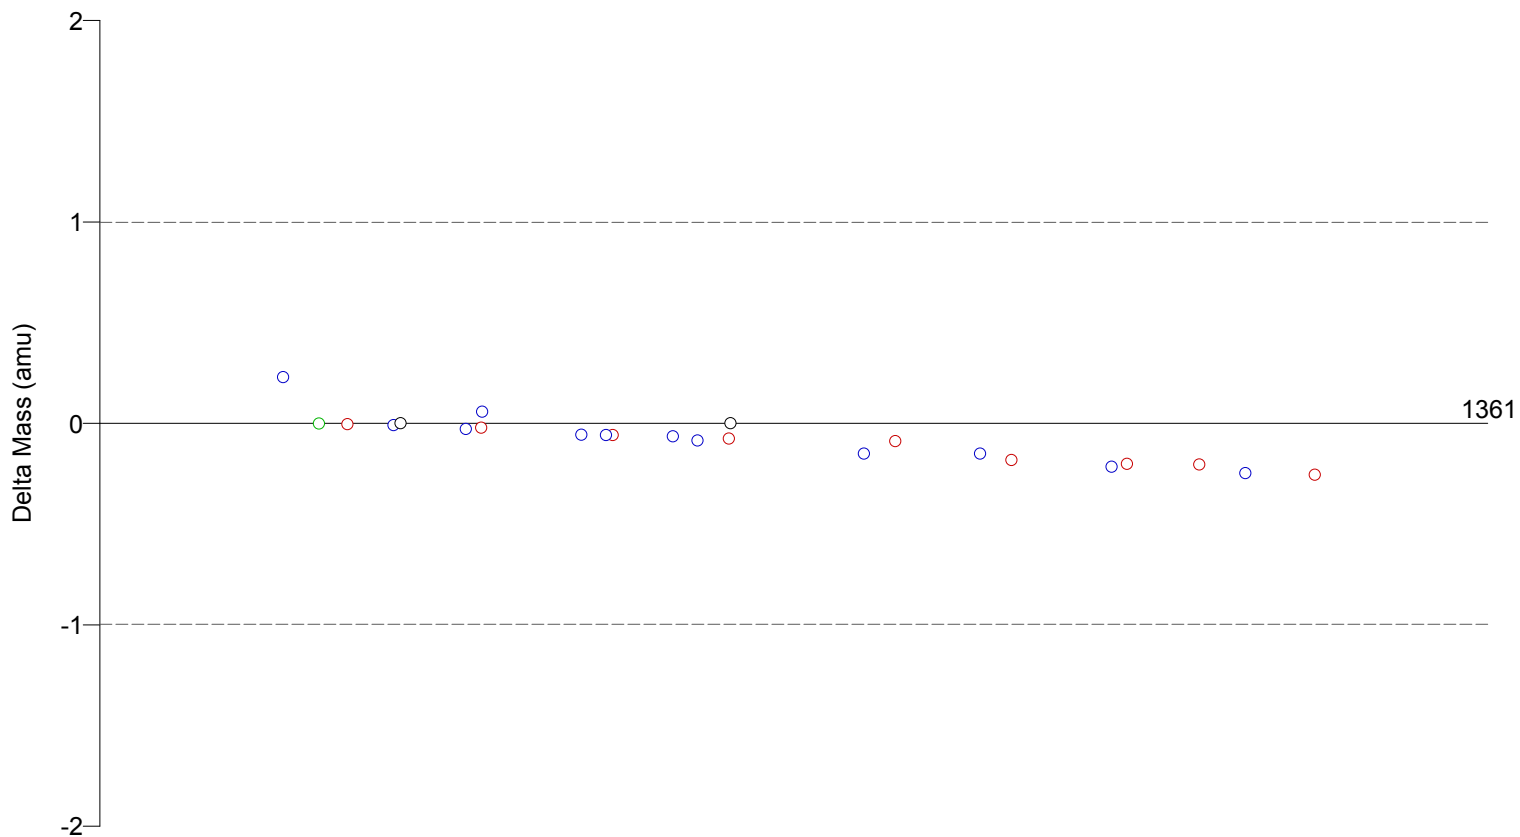

#19287468-1 NL: 1.28E5



---

| Reference                          |                 |         |   | P      | Score | Coverage | Accession |     |       |       |
|------------------------------------|-----------------|---------|---|--------|-------|----------|-----------|-----|-------|-------|
| Scan(s)                            | Sequence        | MH+     | z | P      | XC    | DeltaCn  | Sp        | RSp | Ions  | Count |
| IPI:IPI00513925.1 ENSEMBL:ENSP0000 |                 |         |   | 5e-005 | 10.2  | 0.0      | 0         |     |       |       |
| 19287468 - 1                       | R.EIMENYNIALR.W | 1365.68 | 2 | 5e-005 | 3.298 | 0.403    | 992.9     | 1   | 18/30 | 3     |

1 of 1 peptide matches reported, 0 removed due to filtering

DTA for scans: 19287468-1  
Precursor ion: 683.35  
Mass type: mono  
Mod's: (M\* +15.99492) C=161.01468

Ion series for charge: +1

| AA | A ions        | B ions         | B* ions | Bo ions | C ions | Y ions         | Y* ions | Yo ions | Z ions |
|----|---------------|----------------|---------|---------|--------|----------------|---------|---------|--------|
| E  | 102.05        | 130.05         |         |         |        |                |         |         |        |
| I  | <b>215.14</b> | <b>243.13</b>  |         |         |        | 1236.64        |         |         |        |
| M  | 346.18        | <b>374.17</b>  |         |         |        | <b>1123.56</b> |         |         |        |
| E  | 475.22        | <b>503.22</b>  |         |         |        | <b>992.52</b>  |         |         |        |
| N  | 589.27        | <b>617.26</b>  |         |         |        | <b>863.47</b>  |         |         |        |
| Y  | 752.33        | <b>780.32</b>  |         |         |        | <b>749.43</b>  |         |         |        |
| N  | 866.37        | <b>894.37</b>  |         |         |        | <b>586.37</b>  |         |         |        |
| I  | 979.46        | <b>1007.45</b> |         |         |        | <b>472.32</b>  |         |         |        |
| A  | 1050.49       | <b>1078.49</b> |         |         |        | <b>359.24</b>  |         |         |        |
| L  | 1163.58       | <b>1191.57</b> |         |         |        | <b>288.20</b>  |         |         |        |
| R  |               |                |         |         |        | 175.12         |         |         |        |



#19287468-1 NL: 1.28E5



---

| Reference                          |                 |         |   | P      | Score | Coverage | Accession |     |       |       |
|------------------------------------|-----------------|---------|---|--------|-------|----------|-----------|-----|-------|-------|
| Scan(s)                            | Sequence        | MH+     | z | P      | XC    | DeltaCn  | Sp        | RSp | Ions  | Count |
| IPI:IPI00883722.1 TREMBL:BLAKG0;Q6 |                 |         |   | 5e-005 | 10.2  | 0.0      | 0         |     |       |       |
| 19287468 - 1                       | R.EIMENYNIALR.W | 1365.68 | 2 | 5e-005 | 3.298 | 0.403    | 992.9     | 1   | 18/30 | 3     |

1 of 1 peptide matches reported, 0 removed due to filtering

DTA for scans: 19287468-1  
Precursor ion: 683.35  
Mass type: mono  
Mod's: (M\* +15.99492) C=161.01468

Ion series for charge: +1

| AA | A ions        | B ions         | B* ions | Bo ions | C ions | Y ions         | Y* ions | Yo ions | Z ions |
|----|---------------|----------------|---------|---------|--------|----------------|---------|---------|--------|
| E  | 102.05        | 130.05         |         |         |        |                |         |         |        |
| I  | <b>215.14</b> | <b>243.13</b>  |         |         |        | 1236.64        |         |         |        |
| M  | 346.18        | <b>374.17</b>  |         |         |        | <b>1123.56</b> |         |         |        |
| E  | 475.22        | <b>503.22</b>  |         |         |        | <b>992.52</b>  |         |         |        |
| N  | 589.27        | <b>617.26</b>  |         |         |        | <b>863.47</b>  |         |         |        |
| Y  | 752.33        | <b>780.32</b>  |         |         |        | <b>749.43</b>  |         |         |        |
| N  | 866.37        | <b>894.37</b>  |         |         |        | <b>586.37</b>  |         |         |        |
| I  | 979.46        | <b>1007.45</b> |         |         |        | <b>472.32</b>  |         |         |        |
| A  | 1050.49       | <b>1078.49</b> |         |         |        | <b>359.24</b>  |         |         |        |
| L  | 1163.58       | <b>1191.57</b> |         |         |        | <b>288.20</b>  |         |         |        |
| R  |               |                |         |         |        | 175.12         |         |         |        |





#19287468-1 NL: 1.28E5

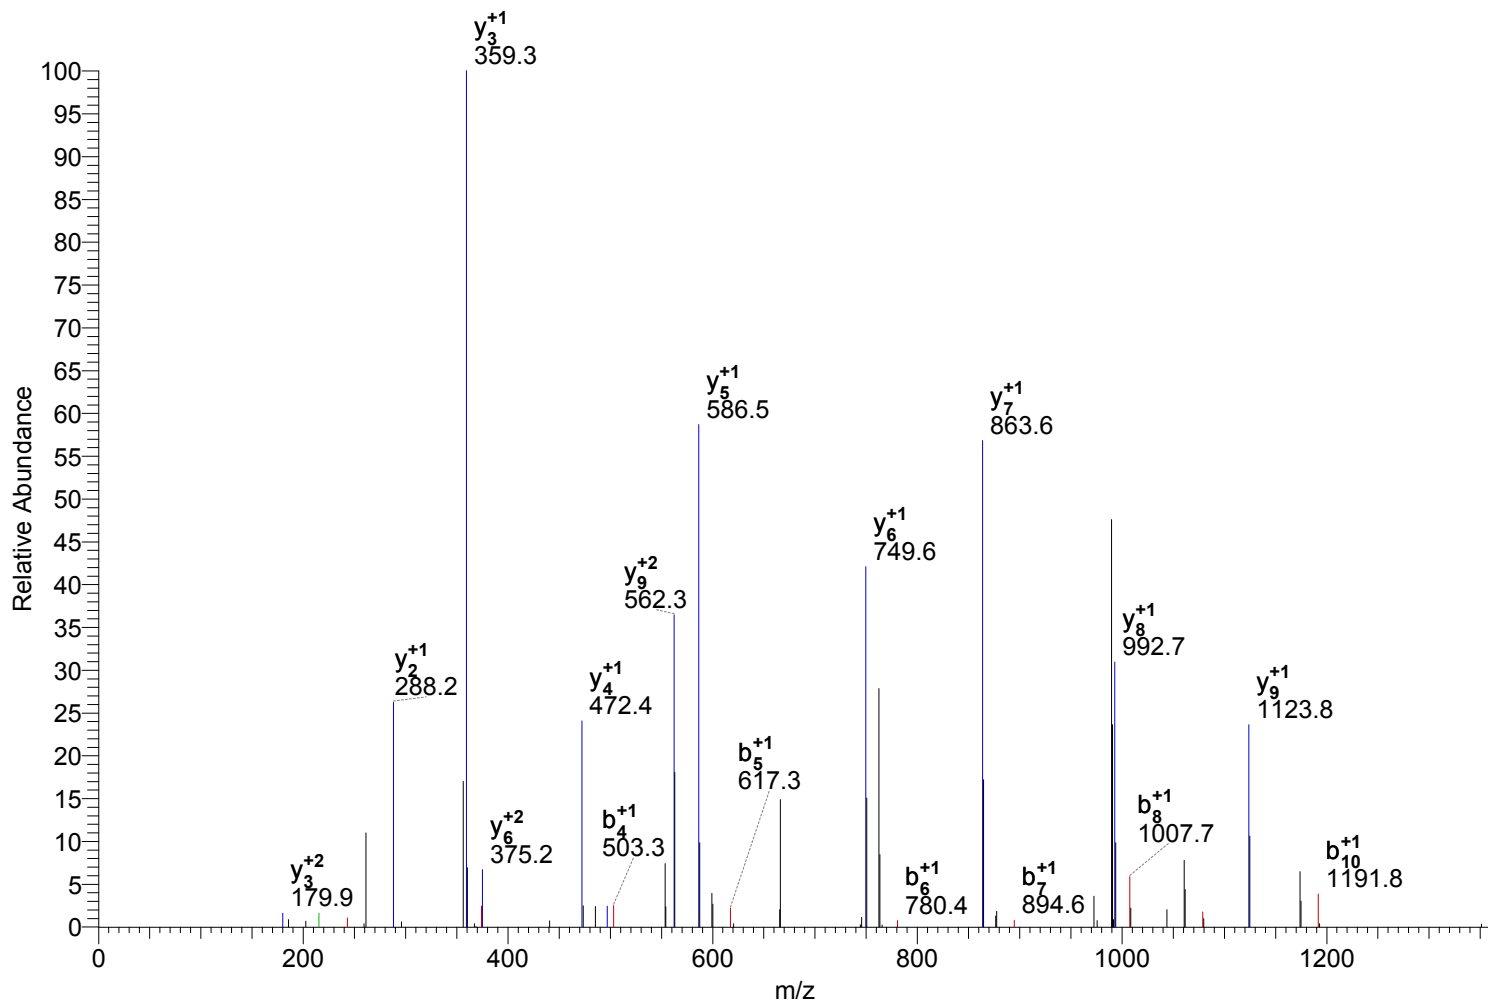

---

| Reference                          |                     |         |   | P      | Score | Coverage | Accession |     |       |       |
|------------------------------------|---------------------|---------|---|--------|-------|----------|-----------|-----|-------|-------|
| Scan(s)                            | Sequence            | MH+     | z | P      | XC    | DeltaCn  | Sp        | RSp | Ions  | Count |
| IPI:IPI00654755.3 SWISS-PROT:P6887 |                     |         |   | 6e-005 | 20.1  | 0.0      | 0         |     |       |       |
| 19287468 - 1                       | K.LHVDPENFR.L       | 1126.56 | 2 | 0.06   | 2.171 | 0.417    | 654.7     | 1   | 14/24 | 5     |
| 19287468 - 1                       | R.LLGNVLCVLAHHFGK.E | 1777.98 | 3 | 6e-005 | 2.552 | 0.484    | 158.2     | 1   | 22/90 | 2     |

2 of 2 peptide matches reported, 0 removed due to filtering

DTA for scans: 19287468-1  
Precursor ion: 563.79  
Mass type: mono  
Mod's: (M\* +15.99492) C=161.01468

Ion series for charge: +1

| AA | A ions        | B ions        | B* ions | Bo ions | C ions | Y ions        | Y* ions | Yo ions | Z ions |
|----|---------------|---------------|---------|---------|--------|---------------|---------|---------|--------|
| L  | 86.10         | 114.09        |         |         |        |               |         |         |        |
| H  | <b>223.16</b> | <b>251.15</b> |         |         |        | 1013.48       |         |         |        |
| V  | <b>322.22</b> | <b>350.22</b> |         |         |        | <b>876.42</b> |         |         |        |
| D  | 437.25        | <b>465.25</b> |         |         |        | <b>777.35</b> |         |         |        |
| P  | 534.30        | 562.30        |         |         |        | <b>662.33</b> |         |         |        |
| E  | <b>663.35</b> | <b>691.34</b> |         |         |        | 565.27        |         |         |        |
| N  | <b>777.39</b> | 805.38        |         |         |        | <b>436.23</b> |         |         |        |
| F  | 924.46        | 952.45        |         |         |        | <b>322.19</b> |         |         |        |
| R  |               |               |         |         |        | <b>175.12</b> |         |         |        |

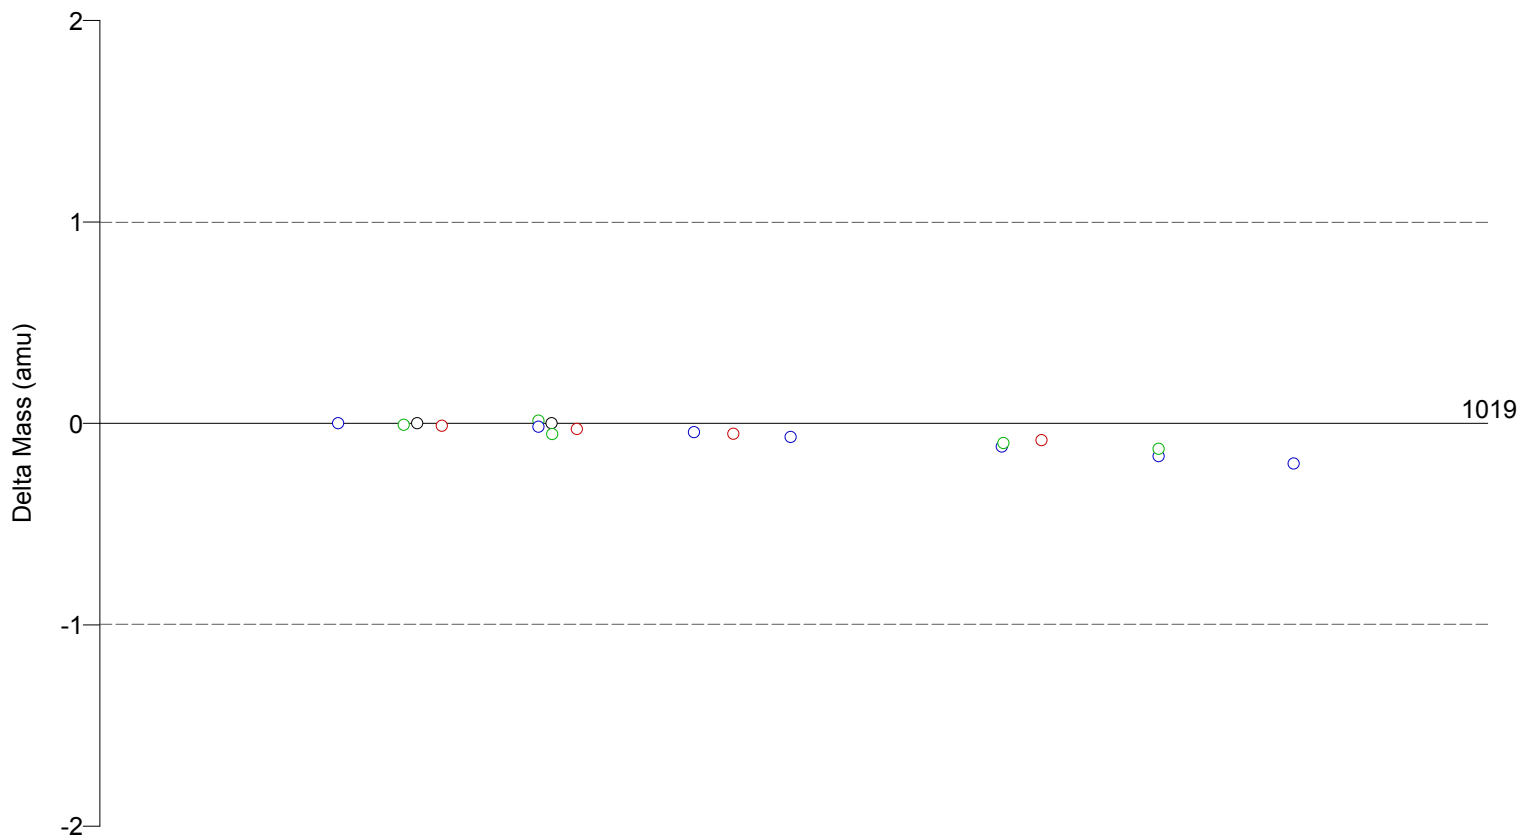

#19287468-1 NL: 7.10E5

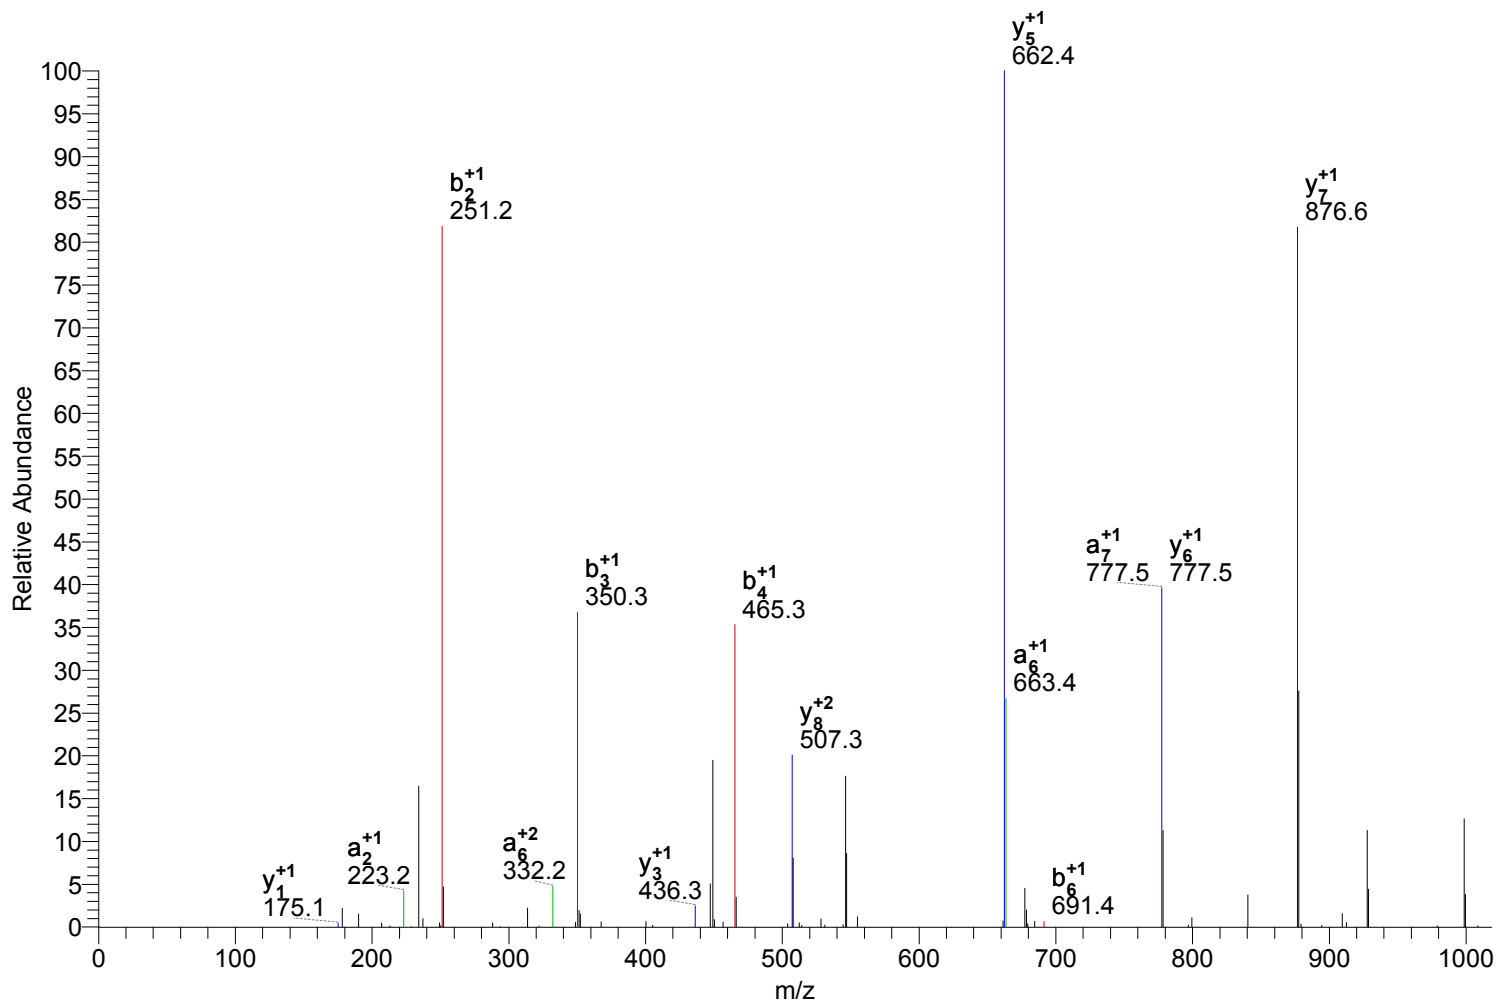

DTA for scans: 19287468-1  
Precursor ion: 593.33  
Mass type: mono  
Mod's: (M\* +15.99492) C=161.01468

Ion series for charge: +1

| AA | A ions        | B ions        | B* ions | Bo ions | C ions | Y ions         | Y* ions | Yo ions | Z ions |
|----|---------------|---------------|---------|---------|--------|----------------|---------|---------|--------|
| L  | 86.10         | 114.09        |         |         |        |                |         |         |        |
| L  | <b>199.18</b> | <b>227.18</b> |         |         |        | 1664.89        |         |         |        |
| G  | 256.20        | <b>284.20</b> |         |         |        | 1551.81        |         |         |        |
| N  | 370.24        | <b>398.24</b> |         |         |        | 1494.79        |         |         |        |
| V  | <b>469.31</b> | <b>497.31</b> |         |         |        | 1380.75        |         |         |        |
| L  | 582.40        | 610.39        |         |         |        | 1281.68        |         |         |        |
| V  | 681.47        | 709.46        |         |         |        | 1168.59        |         |         |        |
| C  | 842.48        | 870.48        |         |         |        | <b>1069.52</b> |         |         |        |
| V  | 941.55        | 969.54        |         |         |        | 908.51         |         |         |        |
| L  | 1054.63       | 1082.63       |         |         |        | 809.44         |         |         |        |
| A  | 1125.67       | 1153.66       |         |         |        | <b>696.36</b>  |         |         |        |
| H  | 1262.73       | 1290.72       |         |         |        | <b>625.32</b>  |         |         |        |
| H  | 1399.79       | 1427.78       |         |         |        | <b>488.26</b>  |         |         |        |
| F  | 1546.86       | 1574.85       |         |         |        | <b>351.20</b>  |         |         |        |
| G  | 1603.88       | 1631.87       |         |         |        | 204.13         |         |         |        |
| K  |               |               |         |         |        | 147.11         |         |         |        |

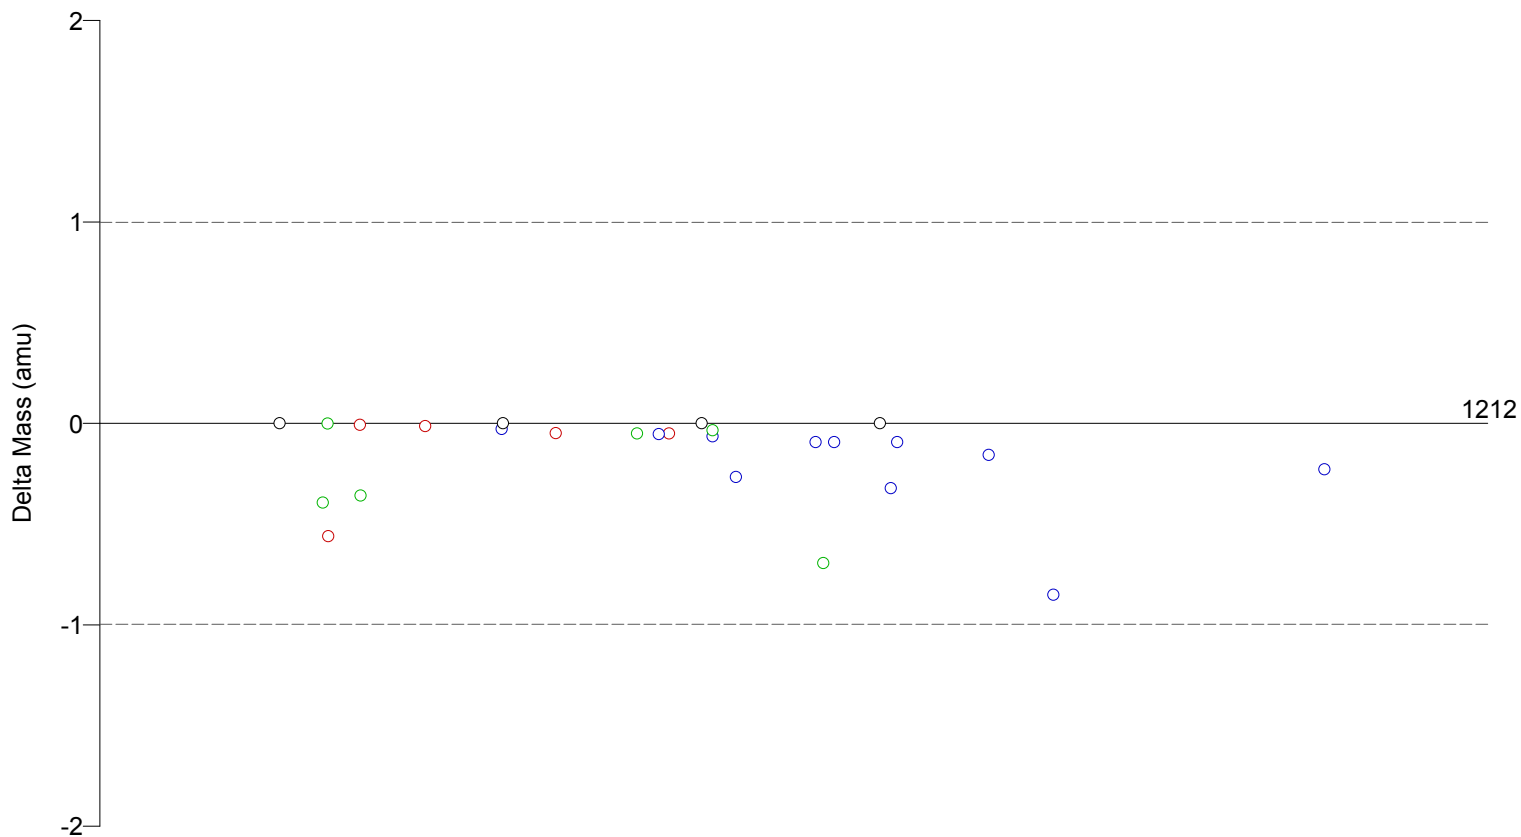

#19287468-1 NL: 6.49E5

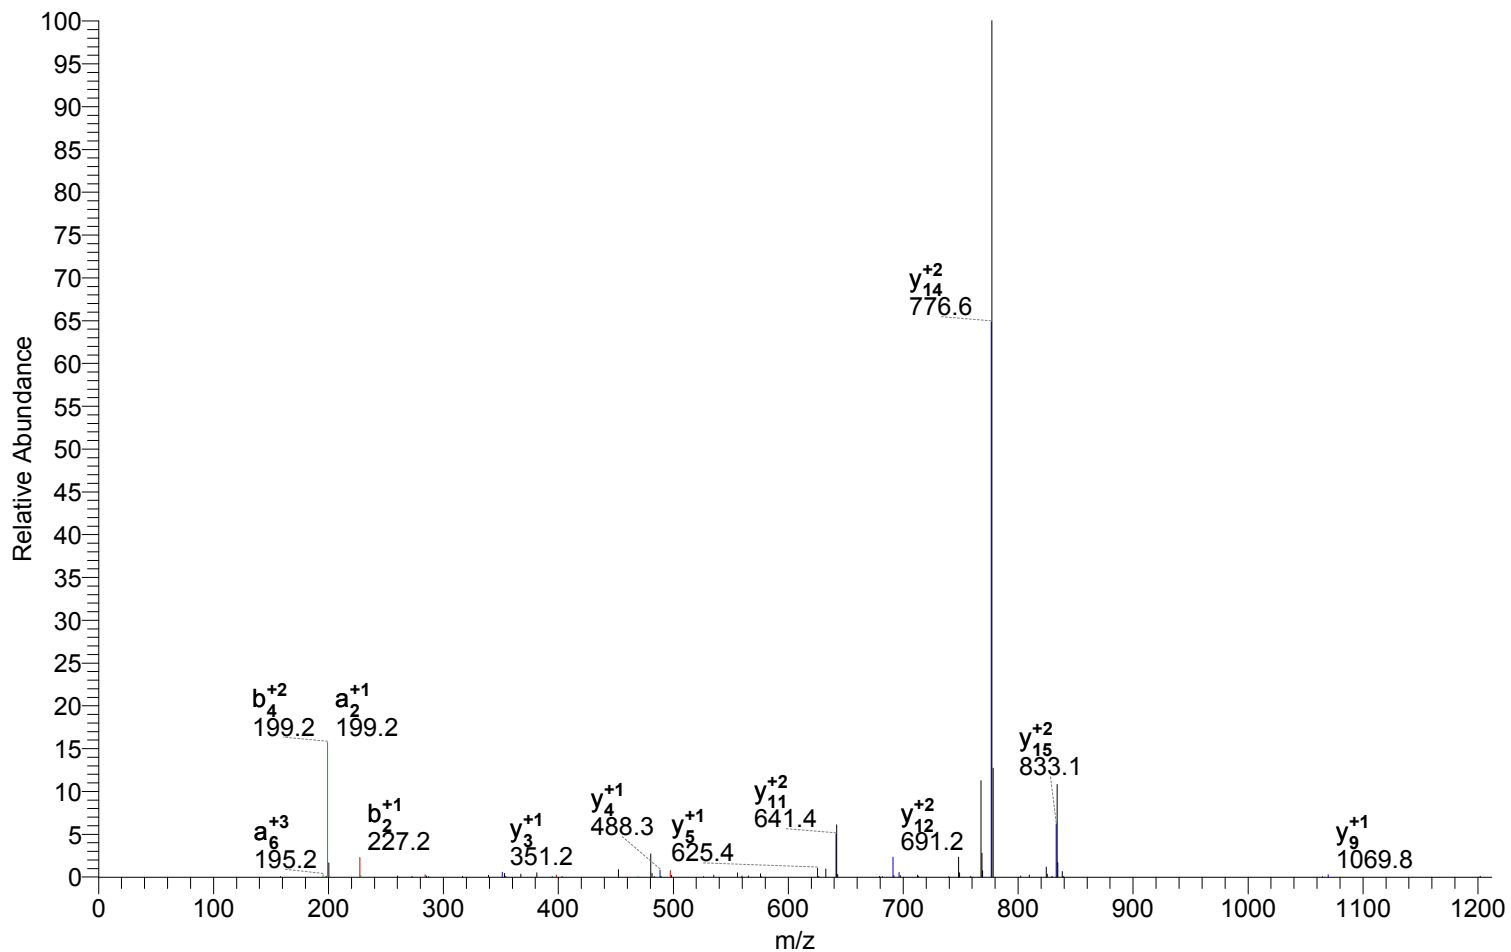

---

| Reference                       |                     |         |   | P      | Score | Coverage | Accession |     |       |       |
|---------------------------------|---------------------|---------|---|--------|-------|----------|-----------|-----|-------|-------|
| Scan(s)                         | Sequence            | MH+     | z | P      | XC    | DeltaCn  | Sp        | RSp | Ions  | Count |
| IPI:IPI00884107.1 TREMBL:Q14473 | Ta                  |         |   | 6e-005 | 20.1  | 0.0      | 0         |     |       |       |
| 19287468 - 1                    | K.LHVDPENFR.L       | 1126.56 | 2 | 0.06   | 2.171 | 0.417    | 654.7     | 1   | 14/24 | 5     |
| 19287468 - 1                    | R.LLGNVLCVLAHHFGK.E | 1777.98 | 3 | 6e-005 | 2.552 | 0.484    | 158.2     | 1   | 22/90 | 2     |

2 of 2 peptide matches reported, 0 removed due to filtering

DTA for scans: 19287468-1  
Precursor ion: 563.79  
Mass type: mono  
Mod's: (M\* +15.99492) C=161.01468

Ion series for charge: +1

| AA | A ions        | B ions        | B* ions | Bo ions | C ions | Y ions        | Y* ions | Yo ions | Z ions |
|----|---------------|---------------|---------|---------|--------|---------------|---------|---------|--------|
| L  | 86.10         | 114.09        |         |         |        |               |         |         |        |
| H  | <b>223.16</b> | <b>251.15</b> |         |         |        | 1013.48       |         |         |        |
| V  | <b>322.22</b> | <b>350.22</b> |         |         |        | <b>876.42</b> |         |         |        |
| D  | 437.25        | <b>465.25</b> |         |         |        | <b>777.35</b> |         |         |        |
| P  | 534.30        | 562.30        |         |         |        | <b>662.33</b> |         |         |        |
| E  | <b>663.35</b> | <b>691.34</b> |         |         |        | 565.27        |         |         |        |
| N  | <b>777.39</b> | 805.38        |         |         |        | <b>436.23</b> |         |         |        |
| F  | 924.46        | 952.45        |         |         |        | <b>322.19</b> |         |         |        |
| R  |               |               |         |         |        | <b>175.12</b> |         |         |        |



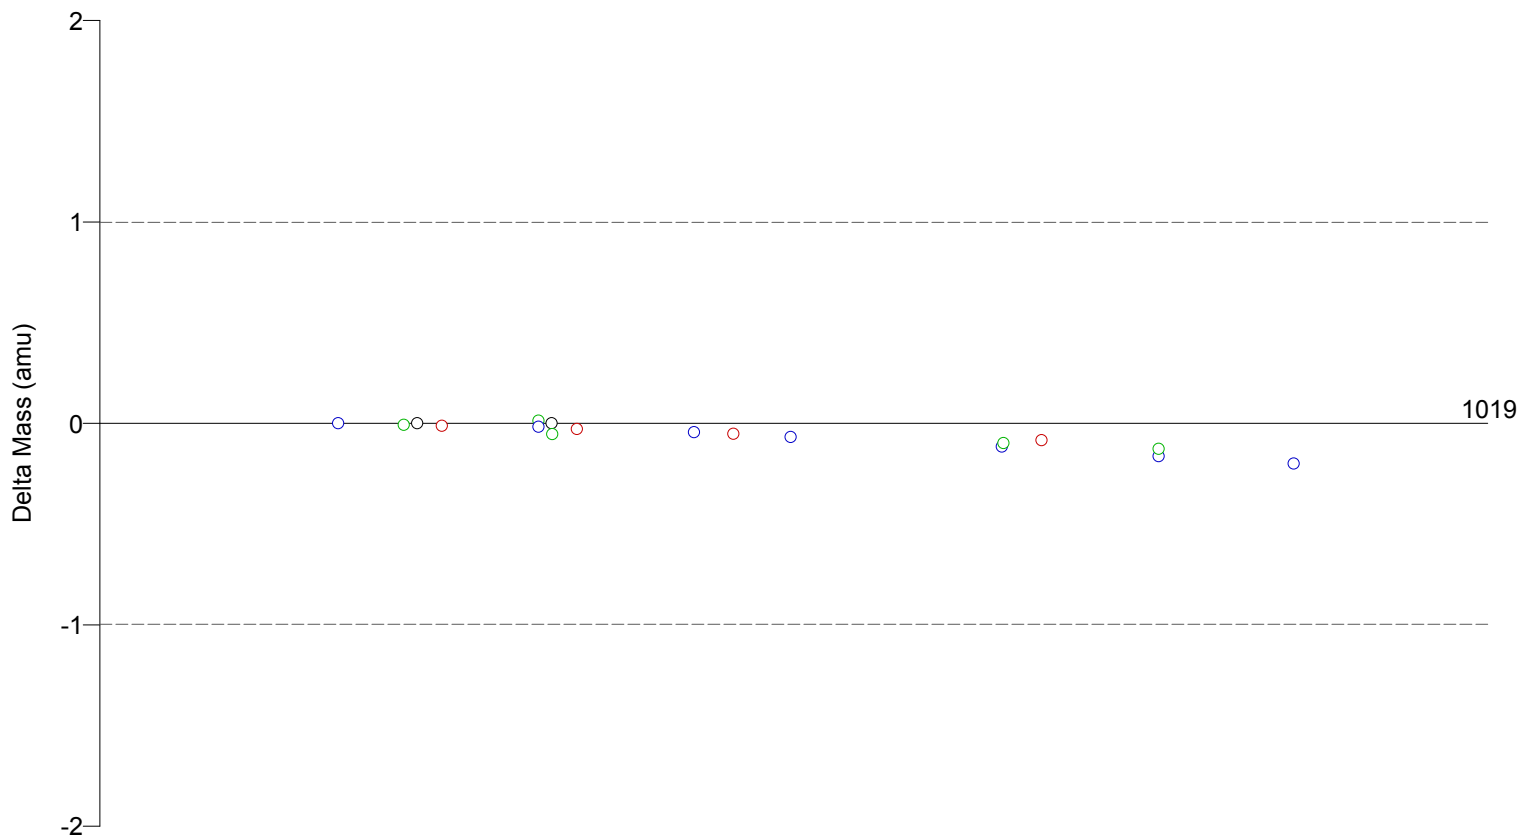

#19287468-1 NL: 7.10E5



DTA for scans: 19287468-1  
Precursor ion: 593.33  
Mass type: mono  
Mod's: (M\* +15.99492) C=161.01468

Ion series for charge: +1

| AA | A ions        | B ions        | B* ions | Bo ions | C ions | Y ions         | Y* ions | Yo ions | Z ions |
|----|---------------|---------------|---------|---------|--------|----------------|---------|---------|--------|
| L  | 86.10         | 114.09        |         |         |        |                |         |         |        |
| L  | <b>199.18</b> | <b>227.18</b> |         |         |        | 1664.89        |         |         |        |
| G  | 256.20        | <b>284.20</b> |         |         |        | 1551.81        |         |         |        |
| N  | 370.24        | <b>398.24</b> |         |         |        | 1494.79        |         |         |        |
| V  | <b>469.31</b> | <b>497.31</b> |         |         |        | 1380.75        |         |         |        |
| L  | 582.40        | 610.39        |         |         |        | 1281.68        |         |         |        |
| V  | 681.47        | 709.46        |         |         |        | 1168.59        |         |         |        |
| C  | 842.48        | 870.48        |         |         |        | <b>1069.52</b> |         |         |        |
| V  | 941.55        | 969.54        |         |         |        | 908.51         |         |         |        |
| L  | 1054.63       | 1082.63       |         |         |        | 809.44         |         |         |        |
| A  | 1125.67       | 1153.66       |         |         |        | <b>696.36</b>  |         |         |        |
| H  | 1262.73       | 1290.72       |         |         |        | <b>625.32</b>  |         |         |        |
| H  | 1399.79       | 1427.78       |         |         |        | <b>488.26</b>  |         |         |        |
| F  | 1546.86       | 1574.85       |         |         |        | <b>351.20</b>  |         |         |        |
| G  | 1603.88       | 1631.87       |         |         |        | 204.13         |         |         |        |
| K  |               |               |         |         |        | 147.11         |         |         |        |



#19287468-1 NL: 6.49E5

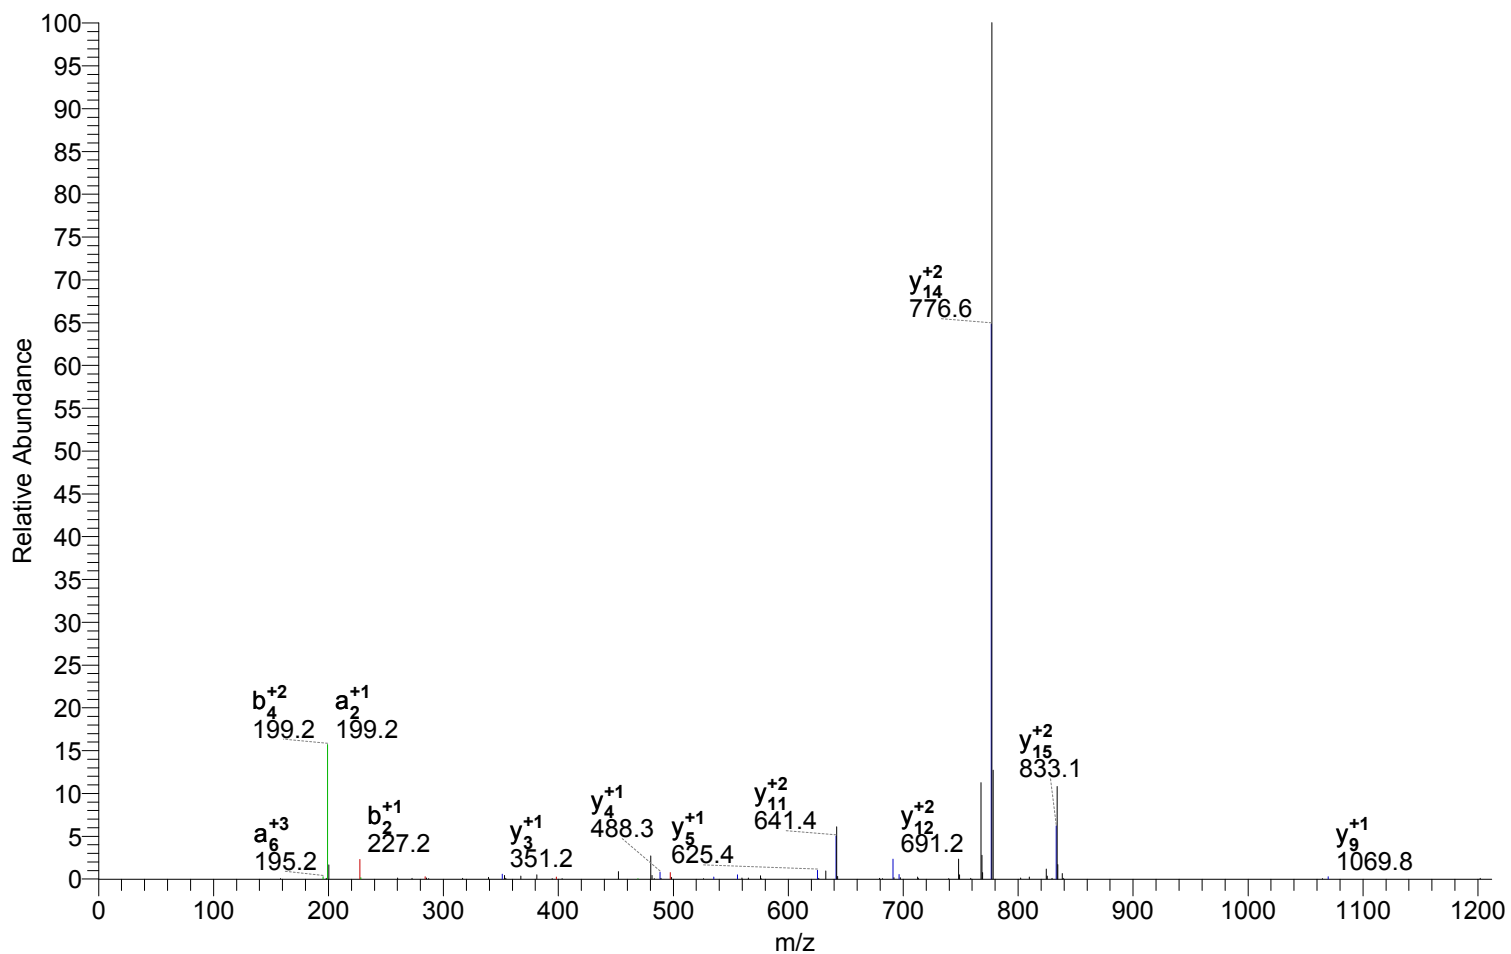

---

| Reference                          |                     |         |   | P      | Score | Coverage | Accession |     |       |       |
|------------------------------------|---------------------|---------|---|--------|-------|----------|-----------|-----|-------|-------|
| Scan(s)                            | Sequence            | MH+     | z | P      | XC    | DeltaCn  | Sp        | RSp | Ions  | Count |
| IPI:IPI00816644.1 TREMBL:Q5GMQ1;Q9 |                     |         |   | 6e-005 | 10.1  | 0.0      | 0         |     |       |       |
| 19287468 - 1                       | R.LLGNVLCVLAHHFGK.E | 1777.98 | 3 | 6e-005 | 2.552 | 0.484    | 158.2     | 1   | 22/90 | 2     |

1 of 1 peptide matches reported, 0 removed due to filtering

DTA for scans: 19287468-1  
Precursor ion: 593.33  
Mass type: mono  
Mod's: (M\* +15.99492) C=161.01468

Ion series for charge: +1

| AA | A ions        | B ions        | B* ions | Bo ions | C ions | Y ions         | Y* ions | Yo ions | Z ions |
|----|---------------|---------------|---------|---------|--------|----------------|---------|---------|--------|
| L  | 86.10         | 114.09        |         |         |        |                |         |         |        |
| L  | <b>199.18</b> | <b>227.18</b> |         |         |        | 1664.89        |         |         |        |
| G  | 256.20        | <b>284.20</b> |         |         |        | 1551.81        |         |         |        |
| N  | 370.24        | <b>398.24</b> |         |         |        | 1494.79        |         |         |        |
| V  | <b>469.31</b> | <b>497.31</b> |         |         |        | 1380.75        |         |         |        |
| L  | 582.40        | 610.39        |         |         |        | 1281.68        |         |         |        |
| V  | 681.47        | 709.46        |         |         |        | 1168.59        |         |         |        |
| C  | 842.48        | 870.48        |         |         |        | <b>1069.52</b> |         |         |        |
| V  | 941.55        | 969.54        |         |         |        | 908.51         |         |         |        |
| L  | 1054.63       | 1082.63       |         |         |        | 809.44         |         |         |        |
| A  | 1125.67       | 1153.66       |         |         |        | <b>696.36</b>  |         |         |        |
| H  | 1262.73       | 1290.72       |         |         |        | <b>625.32</b>  |         |         |        |
| H  | 1399.79       | 1427.78       |         |         |        | <b>488.26</b>  |         |         |        |
| F  | 1546.86       | 1574.85       |         |         |        | <b>351.20</b>  |         |         |        |
| G  | 1603.88       | 1631.87       |         |         |        | 204.13         |         |         |        |
| K  |               |               |         |         |        | 147.11         |         |         |        |



#19287468-1 NL: 6.49E5



---

| Reference                          |               |         |   | P      | Score | Coverage | Accession |     |       |       |
|------------------------------------|---------------|---------|---|--------|-------|----------|-----------|-----|-------|-------|
| Scan(s)                            | Sequence      | MH+     | z | P      | XC    | DeltaCn  | Sp        | RSp | Ions  | Count |
| IPI:IPI00384697.2 SWISS-PROT:P0276 |               |         |   | 0.0001 | 10.2  | 0.0      | 0         |     |       |       |
| 19287468 - 1                       | K.CCTESLVNR.R | 1140.47 | 2 | 0.0001 | 3.308 | 0.574    | 935.4     | 1   | 15/24 | 8     |

1 of 1 peptide matches reported, 0 removed due to filtering

DTA for scans: 19287468-1  
Precursor ion: 570.74  
Mass type: mono  
Mod's: (M\* +15.99492) C=161.01468

Ion series for charge: +1

| AA | A ions        | B ions        | B* ions | Bo ions | C ions | Y ions        | Y* ions | Yo ions | Z ions |
|----|---------------|---------------|---------|---------|--------|---------------|---------|---------|--------|
| C  | 134.03        | 162.02        |         |         |        |               |         |         |        |
| C  | <b>295.04</b> | <b>323.04</b> |         |         |        | 979.45        |         |         |        |
| T  | 396.09        | <b>424.08</b> |         |         |        | <b>818.44</b> |         |         |        |
| E  | 525.13        | <b>553.13</b> |         |         |        | <b>717.39</b> |         |         |        |
| S  | 612.16        | <b>640.16</b> |         |         |        | <b>588.35</b> |         |         |        |
| L  | 725.25        | <b>753.24</b> |         |         |        | <b>501.31</b> |         |         |        |
| V  | 824.32        | <b>852.31</b> |         |         |        | <b>388.23</b> |         |         |        |
| N  | 938.36        | <b>966.35</b> |         |         |        | <b>289.16</b> |         |         |        |
| R  |               |               |         |         |        | <b>175.12</b> |         |         |        |





#19287468-1 NL: 8.98E6



---

| Reference                          |               |         |   | P      | Score | Coverage | Accession |     |       |       |
|------------------------------------|---------------|---------|---|--------|-------|----------|-----------|-----|-------|-------|
| Scan(s)                            | Sequence      | MH+     | z | P      | XC    | DeltaCn  | Sp        | RSp | Ions  | Count |
| IPI:IPI00878517.1 TREMBL:B7WNR0 EN |               |         |   | 0.0001 | 10.2  | 0.0      | 0         |     |       |       |
| 19287468 - 1                       | K.CCTESLVNR.R | 1140.47 | 2 | 0.0001 | 3.308 | 0.574    | 935.4     | 1   | 15/24 | 8     |

1 of 1 peptide matches reported, 0 removed due to filtering

DTA for scans: 19287468-1  
Precursor ion: 570.74  
Mass type: mono  
Mod's: (M\* +15.99492) C=161.01468

Ion series for charge: +1

| AA | A ions        | B ions        | B* ions | Bo ions | C ions | Y ions        | Y* ions | Yo ions | Z ions |
|----|---------------|---------------|---------|---------|--------|---------------|---------|---------|--------|
| C  | 134.03        | 162.02        |         |         |        |               |         |         |        |
| C  | <b>295.04</b> | <b>323.04</b> |         |         |        | 979.45        |         |         |        |
| T  | 396.09        | <b>424.08</b> |         |         |        | <b>818.44</b> |         |         |        |
| E  | 525.13        | <b>553.13</b> |         |         |        | <b>717.39</b> |         |         |        |
| S  | 612.16        | <b>640.16</b> |         |         |        | <b>588.35</b> |         |         |        |
| L  | 725.25        | <b>753.24</b> |         |         |        | <b>501.31</b> |         |         |        |
| V  | 824.32        | <b>852.31</b> |         |         |        | <b>388.23</b> |         |         |        |
| N  | 938.36        | <b>966.35</b> |         |         |        | <b>289.16</b> |         |         |        |
| R  |               |               |         |         |        | <b>175.12</b> |         |         |        |



#19287468-1 NL: 8.98E6



---

| Reference                          |               |         |   | P      | Score | Coverage | Accession |     |       |       |
|------------------------------------|---------------|---------|---|--------|-------|----------|-----------|-----|-------|-------|
| Scan(s)                            | Sequence      | MH+     | z | P      | XC    | DeltaCn  | Sp        | RSp | Ions  | Count |
| IPI:IPI00908876.1 TREMBL:B4DPR2 Ta |               |         |   | 0.0001 | 10.2  | 0.0      | 0         |     |       |       |
| 19287468 - 1                       | K.CCTESLVNR.R | 1140.47 | 2 | 0.0001 | 3.308 | 0.574    | 935.4     | 1   | 15/24 | 8     |

1 of 1 peptide matches reported, 0 removed due to filtering

DTA for scans: 19287468-1  
Precursor ion: 570.74  
Mass type: mono  
Mod's: (M\* +15.99492) C=161.01468

Ion series for charge: +1

| AA | A ions        | B ions        | B* ions | Bo ions | C ions | Y ions        | Y* ions | Yo ions | Z ions |
|----|---------------|---------------|---------|---------|--------|---------------|---------|---------|--------|
| C  | 134.03        | 162.02        |         |         |        |               |         |         |        |
| C  | <b>295.04</b> | <b>323.04</b> |         |         |        | 979.45        |         |         |        |
| T  | 396.09        | <b>424.08</b> |         |         |        | <b>818.44</b> |         |         |        |
| E  | 525.13        | <b>553.13</b> |         |         |        | <b>717.39</b> |         |         |        |
| S  | 612.16        | <b>640.16</b> |         |         |        | <b>588.35</b> |         |         |        |
| L  | 725.25        | <b>753.24</b> |         |         |        | <b>501.31</b> |         |         |        |
| V  | 824.32        | <b>852.31</b> |         |         |        | <b>388.23</b> |         |         |        |
| N  | 938.36        | <b>966.35</b> |         |         |        | <b>289.16</b> |         |         |        |
| R  |               |               |         |         |        | <b>175.12</b> |         |         |        |



#19287468-1 NL: 8.98E6



---

| Reference                          |               |         |   | P      | Score | Coverage | Accession |        |       |       |
|------------------------------------|---------------|---------|---|--------|-------|----------|-----------|--------|-------|-------|
| Scan(s)                            | Sequence      | MH+     | z | P      | XC    | DeltaCn  | Sp        | RSp    | Ions  | Count |
| gi 229552 prf  754920A albumin [Bo |               |         |   | 0.0001 | 10.2  | 0.0      |           | 229552 |       |       |
| 19287468 - 1                       | K.CCTESLVNR.R | 1140.47 | 2 | 0.0001 | 3.308 | 0.574    | 935.4     | 1      | 15/24 | 8     |

1 of 1 peptide matches reported, 0 removed due to filtering



DTA for scans: 19287468-1  
Precursor ion: 570.74  
Mass type: mono  
Mod's: (M\* +15.99492) C=161.01468

Ion series for charge: +1

| AA | A ions        | B ions        | B* ions | Bo ions | C ions | Y ions        | Y* ions | Yo ions | Z ions |
|----|---------------|---------------|---------|---------|--------|---------------|---------|---------|--------|
| C  | 134.03        | 162.02        |         |         |        |               |         |         |        |
| C  | <b>295.04</b> | <b>323.04</b> |         |         |        | 979.45        |         |         |        |
| T  | 396.09        | <b>424.08</b> |         |         |        | <b>818.44</b> |         |         |        |
| E  | 525.13        | <b>553.13</b> |         |         |        | <b>717.39</b> |         |         |        |
| S  | 612.16        | <b>640.16</b> |         |         |        | <b>588.35</b> |         |         |        |
| L  | 725.25        | <b>753.24</b> |         |         |        | <b>501.31</b> |         |         |        |
| V  | 824.32        | <b>852.31</b> |         |         |        | <b>388.23</b> |         |         |        |
| N  | 938.36        | <b>966.35</b> |         |         |        | <b>289.16</b> |         |         |        |
| R  |               |               |         |         |        | <b>175.12</b> |         |         |        |



#19287468-1 NL: 8.98E6



---

| Reference                          |               |         |   | P      | Score | Coverage | Accession |        |       |       |
|------------------------------------|---------------|---------|---|--------|-------|----------|-----------|--------|-------|-------|
| Scan(s)                            | Sequence      | MH+     | z | P      | XC    | DeltaCn  | Sp        | RSp    | Ions  | Count |
| gi 113574 sp P02769 ALBU_BOVIN_SER |               |         |   | 0.0001 | 10.2  | 0.0      |           | 113574 |       |       |
| 19287468 - 1                       | K.CCTESLVNR.R | 1140.47 | 2 | 0.0001 | 3.308 | 0.574    | 935.4     | 1      | 15/24 | 8     |

1 of 1 peptide matches reported, 0 removed due to filtering

DTA for scans: 19287468-1  
Precursor ion: 570.74  
Mass type: mono  
Mod's: (M\* +15.99492) C=161.01468

Ion series for charge: +1

| AA | A ions        | B ions        | B* ions | Bo ions | C ions | Y ions        | Y* ions | Yo ions | Z ions |
|----|---------------|---------------|---------|---------|--------|---------------|---------|---------|--------|
| C  | 134.03        | 162.02        |         |         |        |               |         |         |        |
| C  | <b>295.04</b> | <b>323.04</b> |         |         |        | 979.45        |         |         |        |
| T  | 396.09        | <b>424.08</b> |         |         |        | <b>818.44</b> |         |         |        |
| E  | 525.13        | <b>553.13</b> |         |         |        | <b>717.39</b> |         |         |        |
| S  | 612.16        | <b>640.16</b> |         |         |        | <b>588.35</b> |         |         |        |
| L  | 725.25        | <b>753.24</b> |         |         |        | <b>501.31</b> |         |         |        |
| V  | 824.32        | <b>852.31</b> |         |         |        | <b>388.23</b> |         |         |        |
| N  | 938.36        | <b>966.35</b> |         |         |        | <b>289.16</b> |         |         |        |
| R  |               |               |         |         |        | <b>175.12</b> |         |         |        |



#19287468-1 NL: 8.98E6



| Reference                       |                  |         |   | P      | Score | Coverage | Accession |     |       |       |
|---------------------------------|------------------|---------|---|--------|-------|----------|-----------|-----|-------|-------|
| Scan(s)                         | Sequence         | MH+     | z | P      | XC    | DeltaCn  | Sp        | RSp | Ions  | Count |
| IPI:IPI00386879.1 TREMBL:Q96K68 | Ta               |         |   | 0.0001 | 18.2  | 0.0      |           | 0   |       |       |
| 19287468 - 1                    | R.WLQGSQELPR.E   | 1213.63 | 2 | 0.0001 | 3.386 | 0.262    | 1272.1    | 1   | 18/27 | 19    |
| 19287468 - 1                    | K.NSLYLQM*NSLR.A | 1354.68 | 2 | 0.002  | 2.168 | 0.118    | 607.2     | 1   | 14/30 | 30    |

2 of 2 peptide matches reported, 0 removed due to filtering

DTA for scans: 19287468-1  
Precursor ion: 607.32  
Mass type: mono  
Mod's: (M\* +15.99492) C=161.01468

Ion series for charge: +1

| AA | A ions        | B ions        | B* ions | Bo ions | C ions | Y ions        | Y* ions | Yo ions | Z ions |
|----|---------------|---------------|---------|---------|--------|---------------|---------|---------|--------|
| W  | 159.09        | 187.09        |         |         |        |               |         |         |        |
| L  | <b>272.18</b> | <b>300.17</b> |         |         |        | 1027.55       |         |         |        |
| Q  | 400.23        | <b>428.23</b> |         |         |        | <b>914.47</b> |         |         |        |
| G  | 457.26        | <b>485.25</b> |         |         |        | <b>786.41</b> |         |         |        |
| S  | 544.29        | <b>572.28</b> |         |         |        | <b>729.39</b> |         |         |        |
| Q  | 672.35        | <b>700.34</b> |         |         |        | <b>642.36</b> |         |         |        |
| E  | 801.39        | <b>829.38</b> |         |         |        | <b>514.30</b> |         |         |        |
| L  | <b>914.47</b> | <b>942.47</b> |         |         |        | <b>385.26</b> |         |         |        |
| P  | 1011.53       | 1039.52       |         |         |        | <b>272.17</b> |         |         |        |
| R  |               |               |         |         |        | <b>175.12</b> |         |         |        |

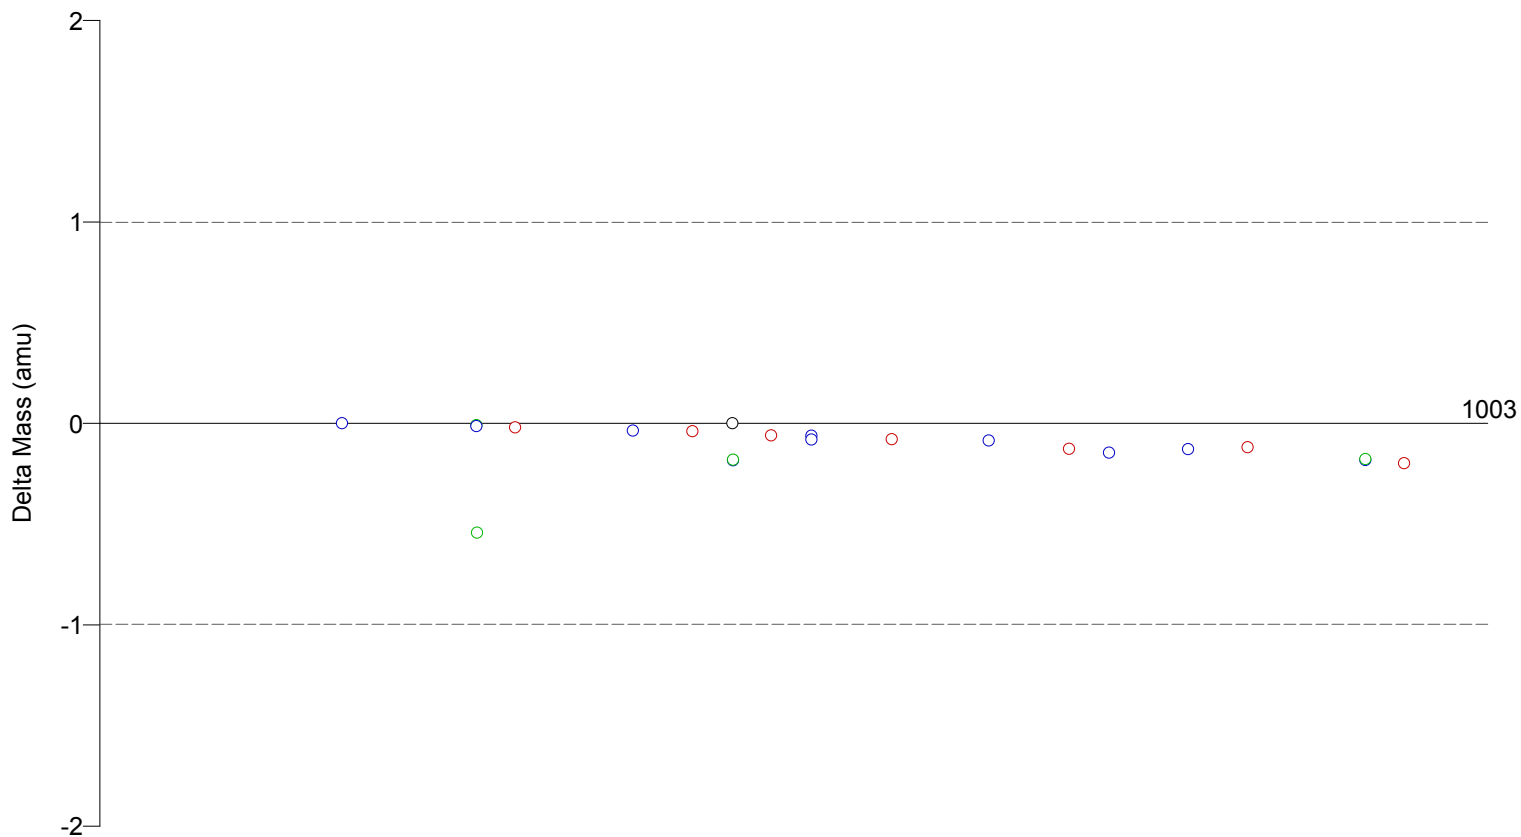

#19287468-1 NL: 1.26E5

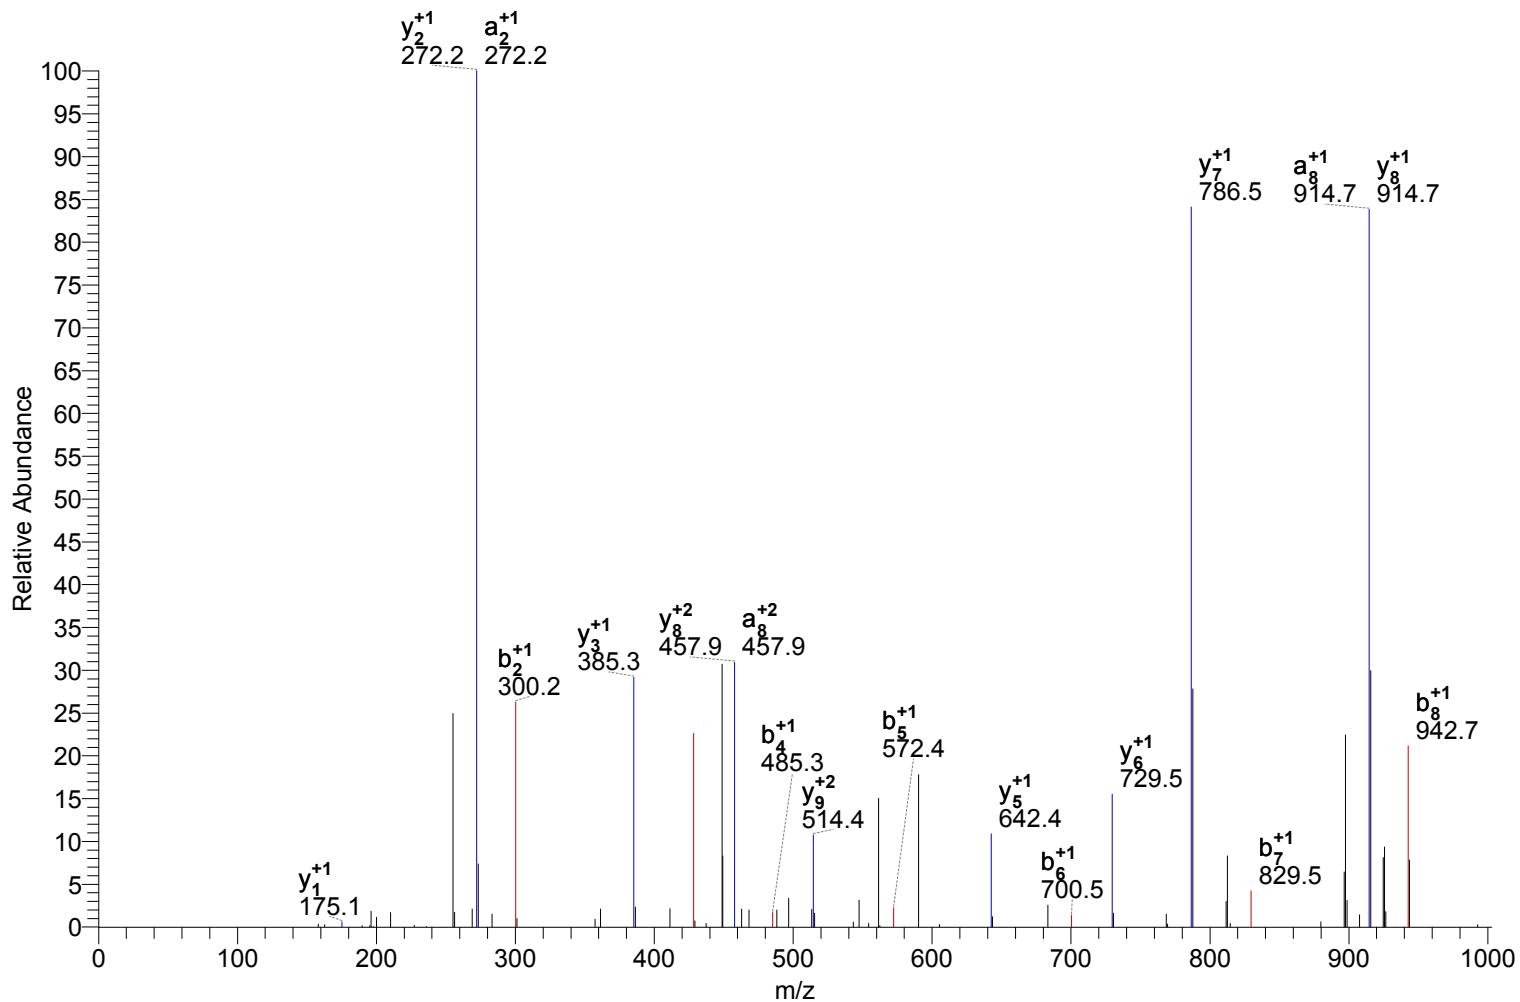



DTA for scans: 19287468-1  
Precursor ion: 677.84  
Mass type: mono  
Mod's: (M\* +15.99492) C=161.01468

Ion series for charge: +1

| AA | A ions         | B ions        | B* ions | Bo ions | C ions | Y ions         | Y* ions | Yo ions | Z ions |
|----|----------------|---------------|---------|---------|--------|----------------|---------|---------|--------|
| N  | 87.06          | 115.05        |         |         |        |                |         |         |        |
| S  | 174.09         | 202.08        |         |         |        | 1240.64        |         |         |        |
| L  | 287.17         | <b>315.17</b> |         |         |        | 1153.60        |         |         |        |
| Y  | 450.23         | <b>478.23</b> |         |         |        | <b>1040.52</b> |         |         |        |
| L  | <b>563.32</b>  | <b>591.31</b> |         |         |        | <b>877.46</b>  |         |         |        |
| Q  | 691.38         | 719.37        |         |         |        | <b>764.37</b>  |         |         |        |
| M* | 838.41         | 866.41        |         |         |        | <b>636.31</b>  |         |         |        |
| N  | 952.46         | <b>980.45</b> |         |         |        | <b>489.28</b>  |         |         |        |
| S  | <b>1039.49</b> | 1067.48       |         |         |        | <b>375.24</b>  |         |         |        |
| L  | 1152.57        | 1180.57       |         |         |        | <b>288.20</b>  |         |         |        |
| R  |                |               |         |         |        | 175.12         |         |         |        |

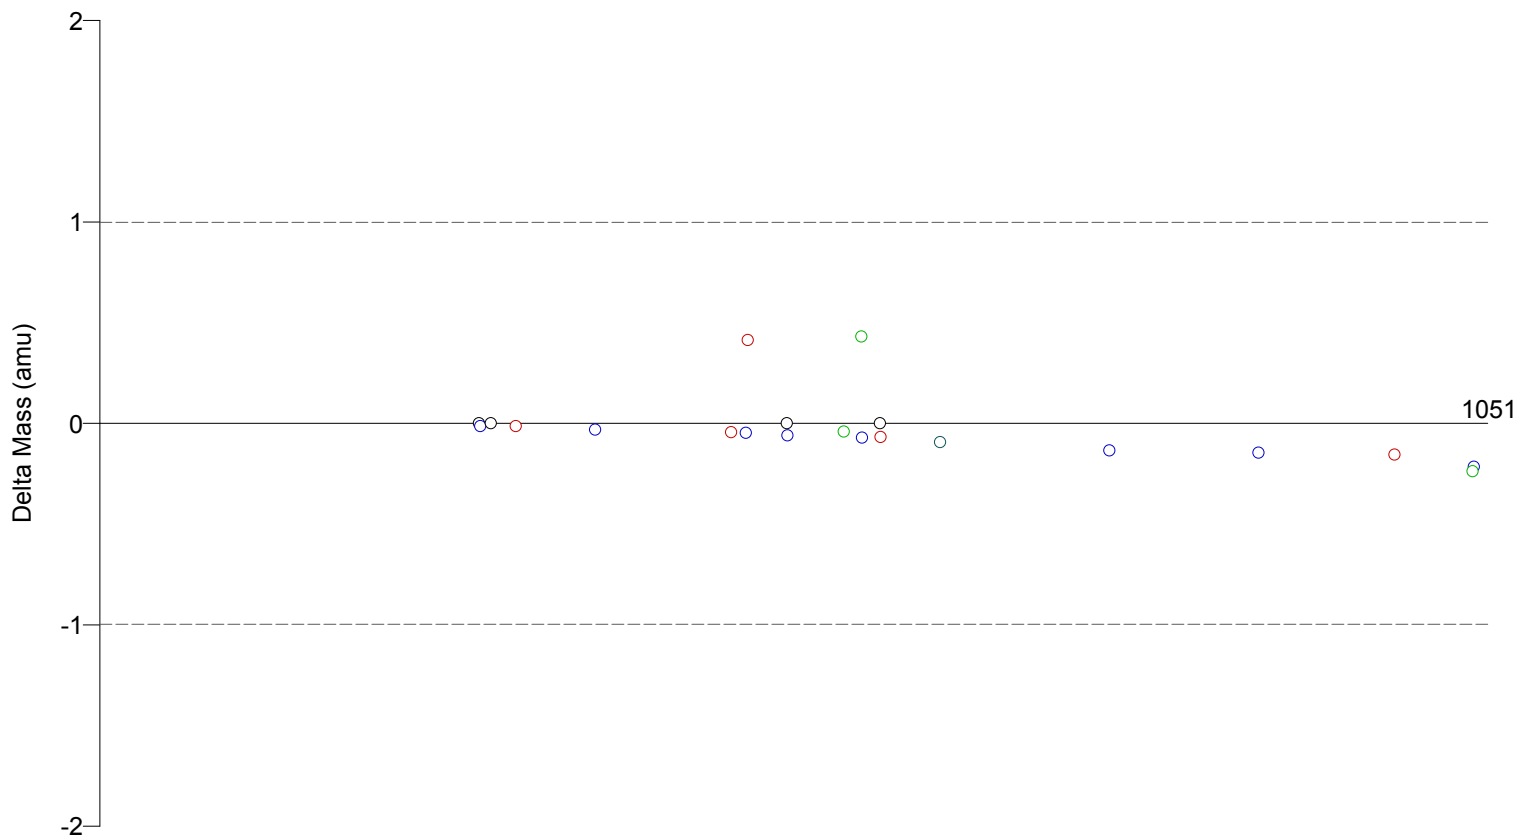

#19287468-1 NL: 8.93E4

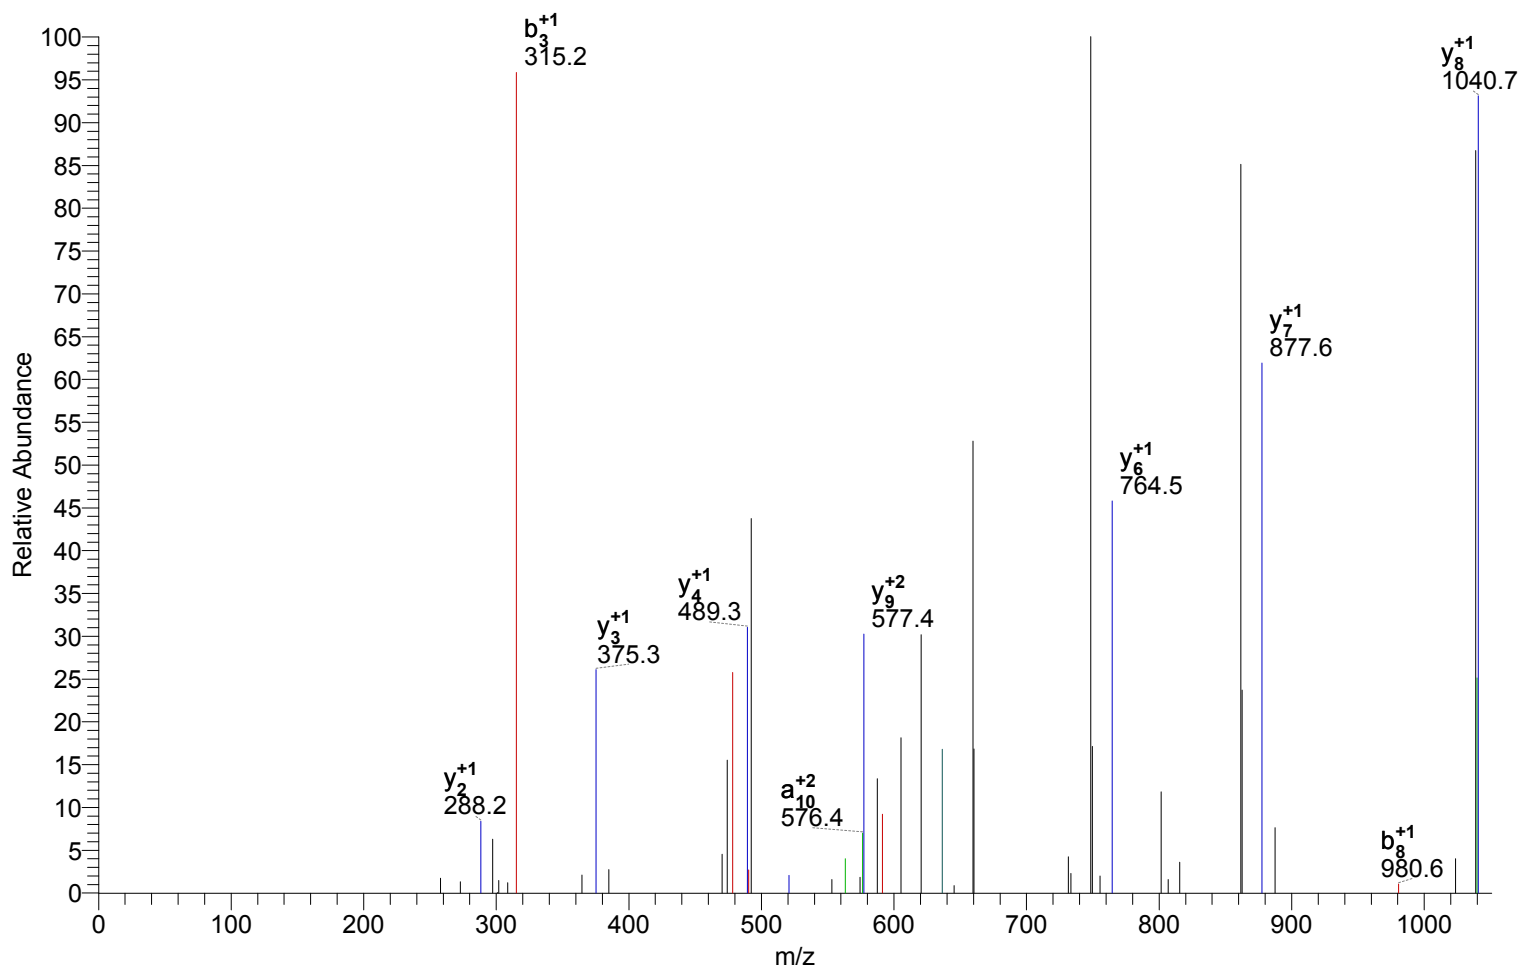

---

| Reference                          |                  |         |   | P      | Score | Coverage | Accession |     |       |       |
|------------------------------------|------------------|---------|---|--------|-------|----------|-----------|-----|-------|-------|
| Scan(s)                            | Sequence         | MH+     | z | P      | XC    | DeltaCn  | Sp        | RSp | Ions  | Count |
| IPI:IPI00784950.1 TREMBL:Q6MZV6 Ta |                  |         |   | 0.0001 | 18.2  | 0.0      |           | 0   |       |       |
| 19287468 - 1                       | R.WLQGSQELPR.E   | 1213.63 | 2 | 0.0001 | 3.386 | 0.262    | 1272.1    | 1   | 18/27 | 19    |
| 19287468 - 1                       | K.NSLYLQM*NSLR.A | 1354.68 | 2 | 0.002  | 2.168 | 0.118    | 607.2     | 1   | 14/30 | 30    |

2 of 2 peptide matches reported, 0 removed due to filtering

DTA for scans: 19287468-1  
Precursor ion: 607.32  
Mass type: mono  
Mod's: (M\* +15.99492) C=161.01468

Ion series for charge: +1

| AA | A ions        | B ions        | B* ions | Bo ions | C ions | Y ions        | Y* ions | Yo ions | Z ions |
|----|---------------|---------------|---------|---------|--------|---------------|---------|---------|--------|
| W  | 159.09        | 187.09        |         |         |        |               |         |         |        |
| L  | <b>272.18</b> | <b>300.17</b> |         |         |        | 1027.55       |         |         |        |
| Q  | 400.23        | <b>428.23</b> |         |         |        | <b>914.47</b> |         |         |        |
| G  | 457.26        | <b>485.25</b> |         |         |        | <b>786.41</b> |         |         |        |
| S  | 544.29        | <b>572.28</b> |         |         |        | <b>729.39</b> |         |         |        |
| Q  | 672.35        | <b>700.34</b> |         |         |        | <b>642.36</b> |         |         |        |
| E  | 801.39        | <b>829.38</b> |         |         |        | <b>514.30</b> |         |         |        |
| L  | <b>914.47</b> | <b>942.47</b> |         |         |        | <b>385.26</b> |         |         |        |
| P  | 1011.53       | 1039.52       |         |         |        | <b>272.17</b> |         |         |        |
| R  |               |               |         |         |        | <b>175.12</b> |         |         |        |



#19287468-1 NL: 1.26E5



DTA for scans: 19287468-1  
Precursor ion: 677.84  
Mass type: mono  
Mod's: (M\* +15.99492) C=161.01468

Ion series for charge: +1

| AA | A ions         | B ions        | B* ions | Bo ions | C ions | Y ions         | Y* ions | Yo ions | Z ions |
|----|----------------|---------------|---------|---------|--------|----------------|---------|---------|--------|
| N  | 87.06          | 115.05        |         |         |        |                |         |         |        |
| S  | 174.09         | 202.08        |         |         |        | 1240.64        |         |         |        |
| L  | 287.17         | <b>315.17</b> |         |         |        | 1153.60        |         |         |        |
| Y  | 450.23         | <b>478.23</b> |         |         |        | <b>1040.52</b> |         |         |        |
| L  | <b>563.32</b>  | <b>591.31</b> |         |         |        | <b>877.46</b>  |         |         |        |
| Q  | 691.38         | 719.37        |         |         |        | <b>764.37</b>  |         |         |        |
| M* | 838.41         | 866.41        |         |         |        | <b>636.31</b>  |         |         |        |
| N  | 952.46         | <b>980.45</b> |         |         |        | <b>489.28</b>  |         |         |        |
| S  | <b>1039.49</b> | 1067.48       |         |         |        | <b>375.24</b>  |         |         |        |
| L  | 1152.57        | 1180.57       |         |         |        | <b>288.20</b>  |         |         |        |
| R  |                |               |         |         |        | 175.12         |         |         |        |



#19287468-1 NL: 8.93E4



---

| Reference                       |                               |         |   | P      | Score | Coverage | Accession |     |       |       |
|---------------------------------|-------------------------------|---------|---|--------|-------|----------|-----------|-----|-------|-------|
| Scan(s)                         | Sequence                      | MH+     | z | P      | XC    | DeltaCn  | Sp        | RSp | Ions  | Count |
| IPI:IPI00383164.1 TREMBL:Q8WY24 | Tax_Id=9606 Gene_Symbol=IGHA1 |         |   | 0.0001 | 10.2  | 0.0      | 0         |     |       |       |
| 19287468 - 1                    | R.WLQGSQELPR.E                | 1213.63 | 2 | 0.0001 | 3.386 | 0.262    | 1272.1    | 1   | 18/27 | 19    |

1 of 1 peptide matches reported, 0 removed due to filtering



DTA for scans: 19287468-1  
Precursor ion: 607.32  
Mass type: mono  
Mod's: (M\* +15.99492) C=161.01468

Ion series for charge: +1

| AA | A ions        | B ions        | B* ions | Bo ions | C ions | Y ions        | Y* ions | Yo ions | Z ions |
|----|---------------|---------------|---------|---------|--------|---------------|---------|---------|--------|
| W  | 159.09        | 187.09        |         |         |        |               |         |         |        |
| L  | <b>272.18</b> | <b>300.17</b> |         |         |        | 1027.55       |         |         |        |
| Q  | 400.23        | <b>428.23</b> |         |         |        | <b>914.47</b> |         |         |        |
| G  | 457.26        | <b>485.25</b> |         |         |        | <b>786.41</b> |         |         |        |
| S  | 544.29        | <b>572.28</b> |         |         |        | <b>729.39</b> |         |         |        |
| Q  | 672.35        | <b>700.34</b> |         |         |        | <b>642.36</b> |         |         |        |
| E  | 801.39        | <b>829.38</b> |         |         |        | <b>514.30</b> |         |         |        |
| L  | <b>914.47</b> | <b>942.47</b> |         |         |        | <b>385.26</b> |         |         |        |
| P  | 1011.53       | 1039.52       |         |         |        | <b>272.17</b> |         |         |        |
| R  |               |               |         |         |        | <b>175.12</b> |         |         |        |



#19287468-1 NL: 1.26E5



---

| Reference                          |                |         |   | P      | Score | Coverage | Accession |     |       |       |
|------------------------------------|----------------|---------|---|--------|-------|----------|-----------|-----|-------|-------|
| Scan(s)                            | Sequence       | MH+     | z | P      | XC    | DeltaCn  | Sp        | RSp | Ions  | Count |
| IPI:IPI00384952.1 TREMBL:Q7Z379 Ta |                |         |   | 0.0001 | 10.2  | 0.0      | 0         |     |       |       |
| 19287468 - 1                       | R.WLQGSQELPR.E | 1213.63 | 2 | 0.0001 | 3.386 | 0.262    | 1272.1    | 1   | 18/27 | 19    |

1 of 1 peptide matches reported, 0 removed due to filtering

DTA for scans: 19287468-1  
Precursor ion: 607.32  
Mass type: mono  
Mod's: (M\* +15.99492) C=161.01468

Ion series for charge: +1

| AA | A ions        | B ions        | B* ions | Bo ions | C ions | Y ions        | Y* ions | Yo ions | Z ions |
|----|---------------|---------------|---------|---------|--------|---------------|---------|---------|--------|
| W  | 159.09        | 187.09        |         |         |        |               |         |         |        |
| L  | <b>272.18</b> | <b>300.17</b> |         |         |        | 1027.55       |         |         |        |
| Q  | 400.23        | <b>428.23</b> |         |         |        | <b>914.47</b> |         |         |        |
| G  | 457.26        | <b>485.25</b> |         |         |        | <b>786.41</b> |         |         |        |
| S  | 544.29        | <b>572.28</b> |         |         |        | <b>729.39</b> |         |         |        |
| Q  | 672.35        | <b>700.34</b> |         |         |        | <b>642.36</b> |         |         |        |
| E  | 801.39        | <b>829.38</b> |         |         |        | <b>514.30</b> |         |         |        |
| L  | <b>914.47</b> | <b>942.47</b> |         |         |        | <b>385.26</b> |         |         |        |
| P  | 1011.53       | 1039.52       |         |         |        | <b>272.17</b> |         |         |        |
| R  |               |               |         |         |        | <b>175.12</b> |         |         |        |

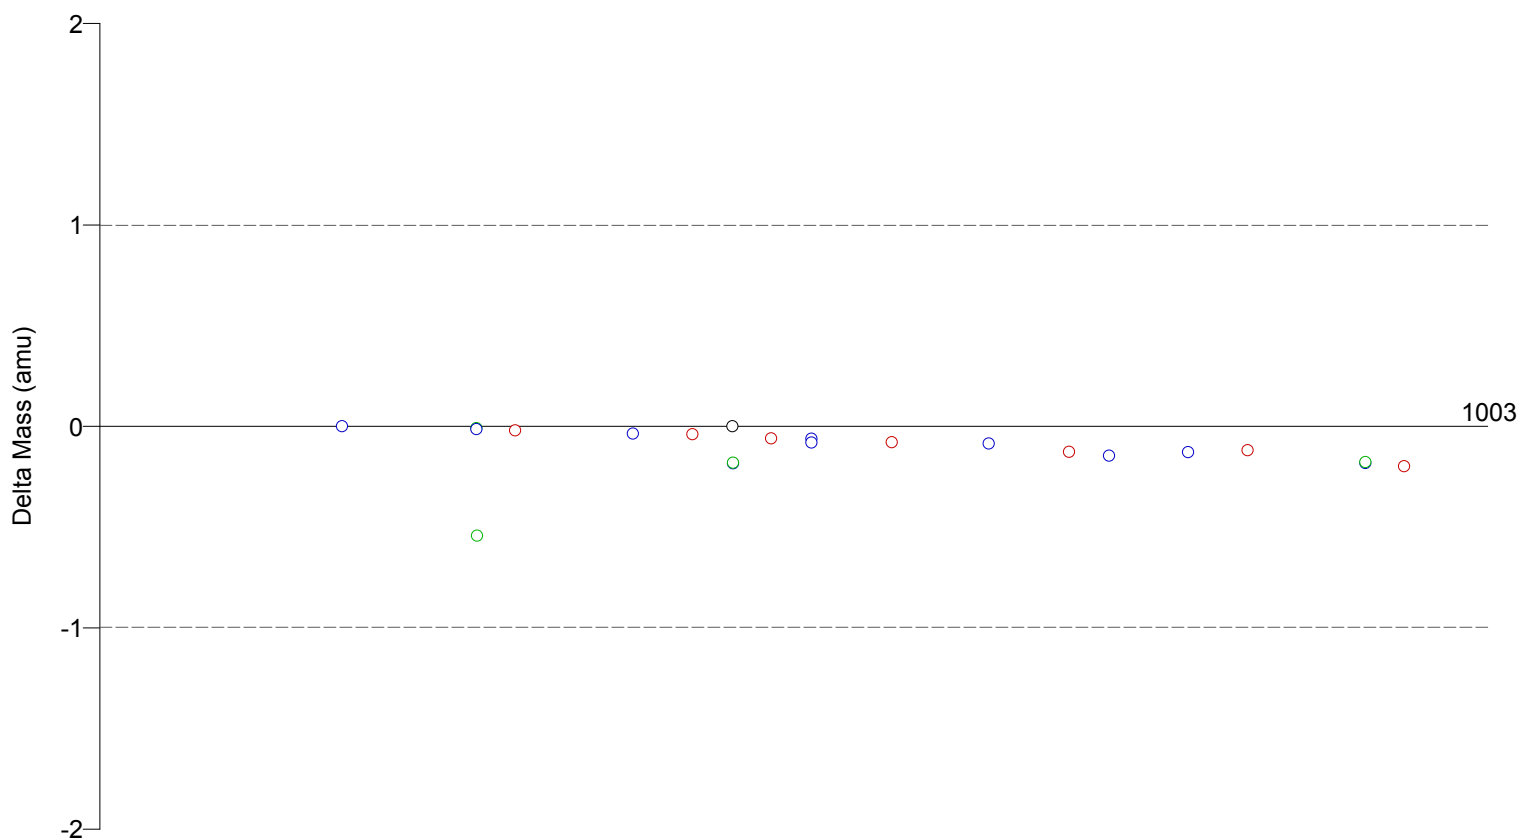

#19287468-1 NL: 1.26E5

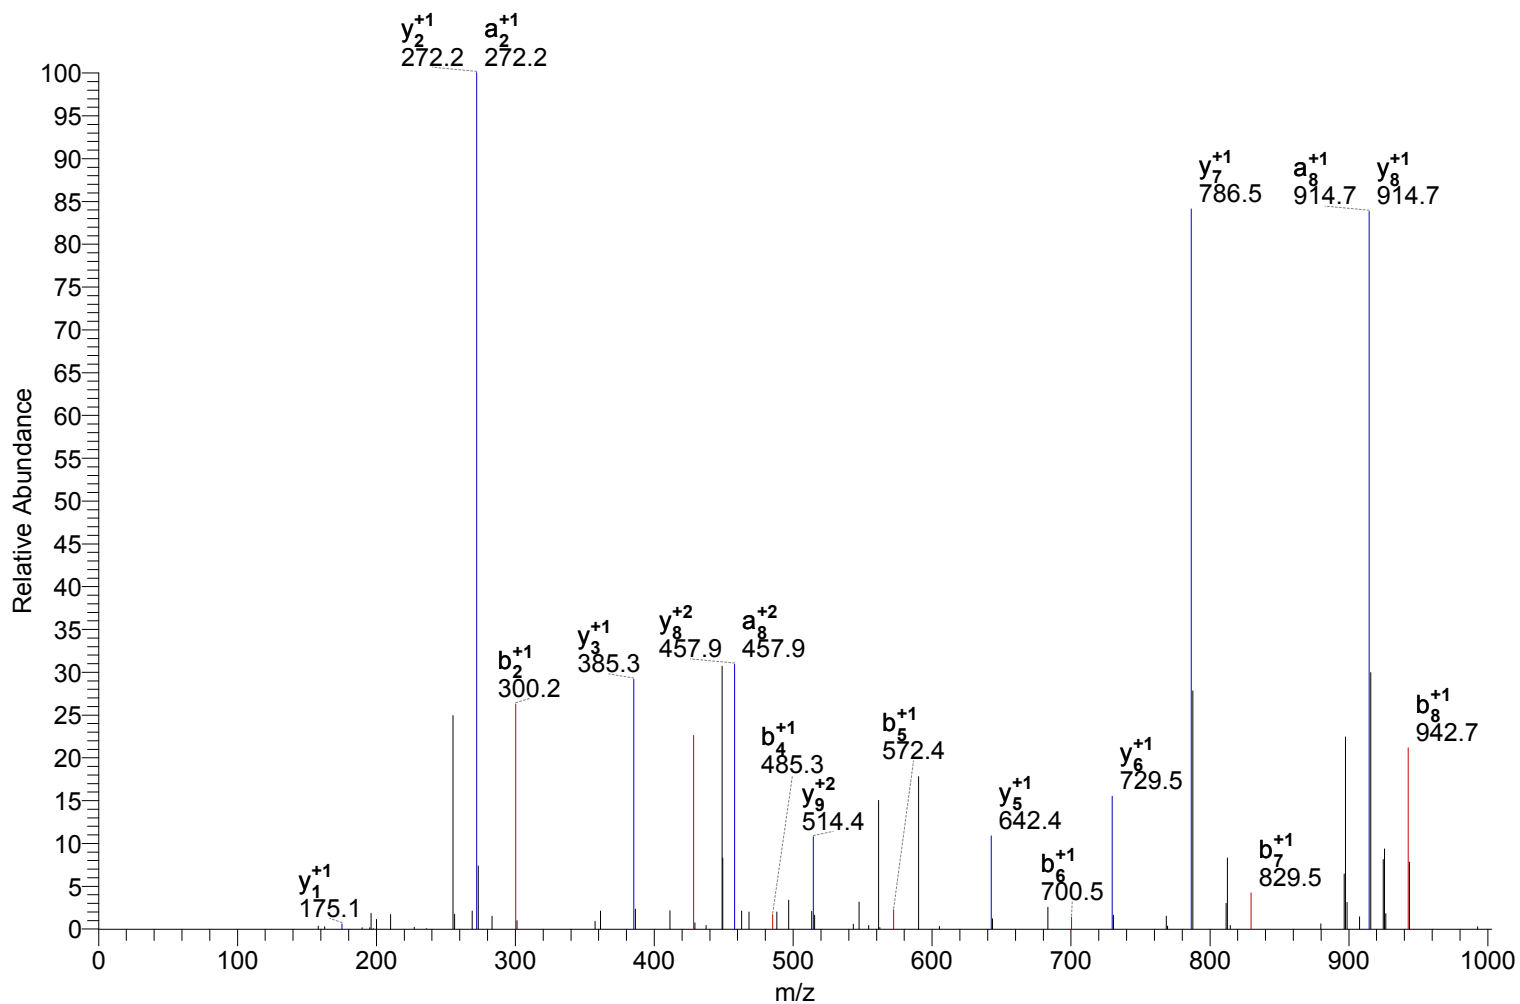

---

| Reference                          |                |         |   | P      | Score | Coverage | Accession |     |       |       |
|------------------------------------|----------------|---------|---|--------|-------|----------|-----------|-----|-------|-------|
| Scan(s)                            | Sequence       | MH+     | z | P      | XC    | DeltaCn  | Sp        | RSp | Ions  | Count |
| IPI:IPI00386524.3 TREMBL:Q96DK0 Ta |                |         |   | 0.0001 | 10.2  | 0.0      | 0         |     |       |       |
| 19287468 - 1                       | R.WLQGSQELPR.E | 1213.63 | 2 | 0.0001 | 3.386 | 0.262    | 1272.1    | 1   | 18/27 | 19    |

1 of 1 peptide matches reported, 0 removed due to filtering

DTA for scans: 19287468-1  
Precursor ion: 607.32  
Mass type: mono  
Mod's: (M\* +15.99492) C=161.01468

Ion series for charge: +1

| AA | A ions        | B ions        | B* ions | Bo ions | C ions | Y ions        | Y* ions | Yo ions | Z ions |
|----|---------------|---------------|---------|---------|--------|---------------|---------|---------|--------|
| W  | 159.09        | 187.09        |         |         |        |               |         |         |        |
| L  | <b>272.18</b> | <b>300.17</b> |         |         |        | 1027.55       |         |         |        |
| Q  | 400.23        | <b>428.23</b> |         |         |        | <b>914.47</b> |         |         |        |
| G  | 457.26        | <b>485.25</b> |         |         |        | <b>786.41</b> |         |         |        |
| S  | 544.29        | <b>572.28</b> |         |         |        | <b>729.39</b> |         |         |        |
| Q  | 672.35        | <b>700.34</b> |         |         |        | <b>642.36</b> |         |         |        |
| E  | 801.39        | <b>829.38</b> |         |         |        | <b>514.30</b> |         |         |        |
| L  | <b>914.47</b> | <b>942.47</b> |         |         |        | <b>385.26</b> |         |         |        |
| P  | 1011.53       | 1039.52       |         |         |        | <b>272.17</b> |         |         |        |
| R  |               |               |         |         |        | <b>175.12</b> |         |         |        |



#19287468-1 NL: 1.26E5





---

| Reference                          |                |         |   | P      | Score | Coverage | Accession |     |       |       |
|------------------------------------|----------------|---------|---|--------|-------|----------|-----------|-----|-------|-------|
| Scan(s)                            | Sequence       | MH+     | z | P      | XC    | DeltaCn  | Sp        | RSp | Ions  | Count |
| IPI:IPI00423460.3 TREMBL:Q6N090 Ta |                |         |   | 0.0001 | 10.2  | 0.0      | 0         |     |       |       |
| 19287468 - 1                       | R.WLQGSQELPR.E | 1213.63 | 2 | 0.0001 | 3.386 | 0.262    | 1272.1    | 1   | 18/27 | 19    |

1 of 1 peptide matches reported, 0 removed due to filtering

DTA for scans: 19287468-1  
Precursor ion: 607.32  
Mass type: mono  
Mod's: (M\* +15.99492) C=161.01468

Ion series for charge: +1

| AA | A ions        | B ions        | B* ions | Bo ions | C ions | Y ions        | Y* ions | Yo ions | Z ions |
|----|---------------|---------------|---------|---------|--------|---------------|---------|---------|--------|
| W  | 159.09        | 187.09        |         |         |        |               |         |         |        |
| L  | <b>272.18</b> | <b>300.17</b> |         |         |        | 1027.55       |         |         |        |
| Q  | 400.23        | <b>428.23</b> |         |         |        | <b>914.47</b> |         |         |        |
| G  | 457.26        | <b>485.25</b> |         |         |        | <b>786.41</b> |         |         |        |
| S  | 544.29        | <b>572.28</b> |         |         |        | <b>729.39</b> |         |         |        |
| Q  | 672.35        | <b>700.34</b> |         |         |        | <b>642.36</b> |         |         |        |
| E  | 801.39        | <b>829.38</b> |         |         |        | <b>514.30</b> |         |         |        |
| L  | <b>914.47</b> | <b>942.47</b> |         |         |        | <b>385.26</b> |         |         |        |
| P  | 1011.53       | 1039.52       |         |         |        | <b>272.17</b> |         |         |        |
| R  |               |               |         |         |        | <b>175.12</b> |         |         |        |

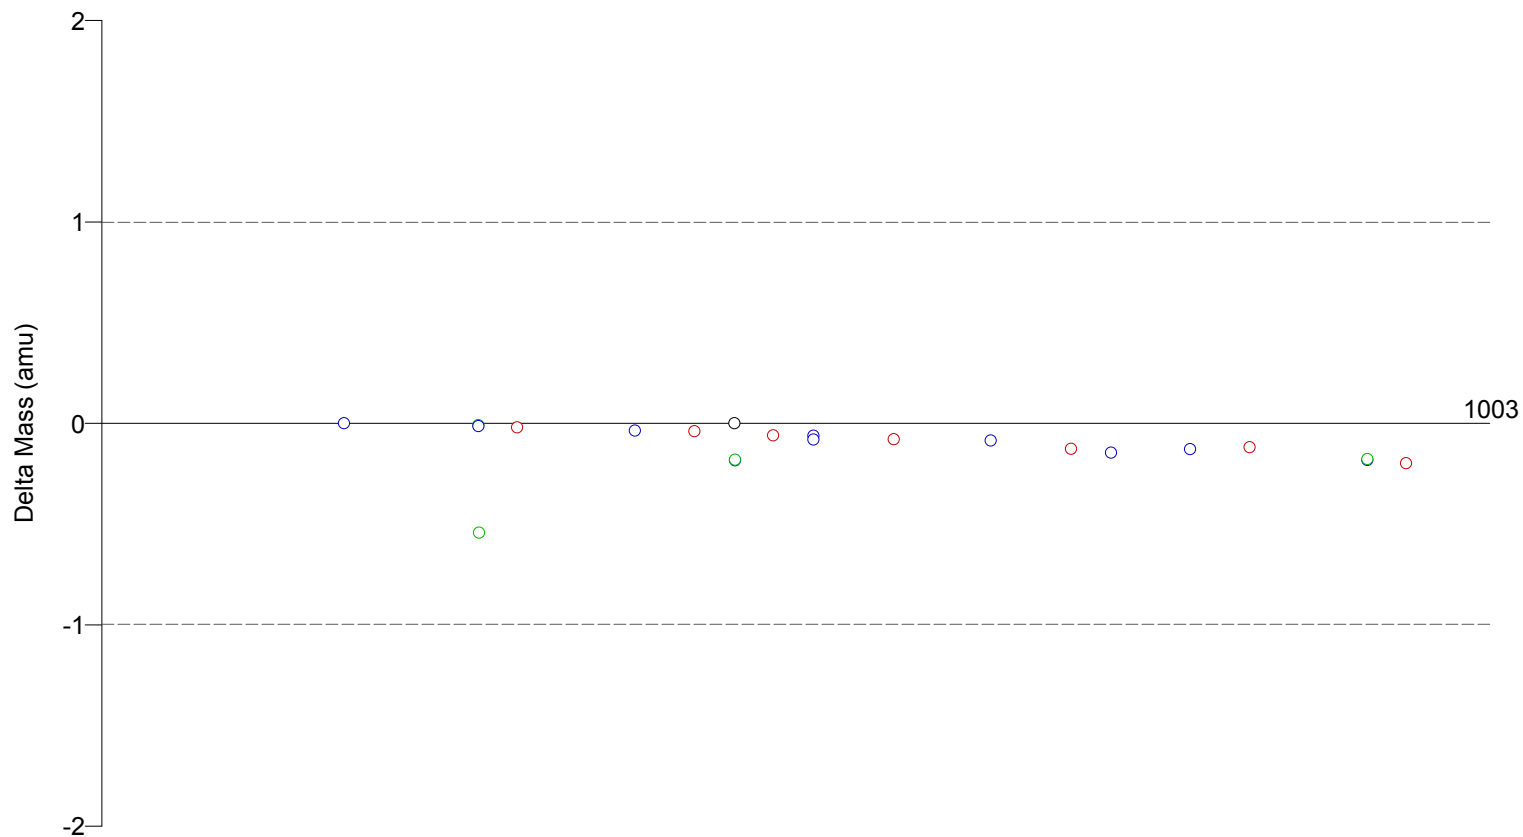

#19287468-1 NL: 1.26E5



---

| Reference                          |                |         |   | P      | Score | Coverage | Accession |     |       |       |
|------------------------------------|----------------|---------|---|--------|-------|----------|-----------|-----|-------|-------|
| Scan(s)                            | Sequence       | MH+     | z | P      | XC    | DeltaCn  | Sp        | RSp | Ions  | Count |
| IPI:IPI00423461.3 TREMBL:Q6N091 Ta |                |         |   | 0.0001 | 10.2  | 0.0      | 0         |     |       |       |
| 19287468 - 1                       | R.WLQGSQELPR.E | 1213.63 | 2 | 0.0001 | 3.386 | 0.262    | 1272.1    | 1   | 18/27 | 19    |

1 of 1 peptide matches reported, 0 removed due to filtering

DTA for scans: 19287468-1  
Precursor ion: 607.32  
Mass type: mono  
Mod's: (M\* +15.99492) C=161.01468

Ion series for charge: +1

| AA | A ions        | B ions        | B* ions | Bo ions | C ions | Y ions        | Y* ions | Yo ions | Z ions |
|----|---------------|---------------|---------|---------|--------|---------------|---------|---------|--------|
| W  | 159.09        | 187.09        |         |         |        |               |         |         |        |
| L  | <b>272.18</b> | <b>300.17</b> |         |         |        | 1027.55       |         |         |        |
| Q  | 400.23        | <b>428.23</b> |         |         |        | <b>914.47</b> |         |         |        |
| G  | 457.26        | <b>485.25</b> |         |         |        | <b>786.41</b> |         |         |        |
| S  | 544.29        | <b>572.28</b> |         |         |        | <b>729.39</b> |         |         |        |
| Q  | 672.35        | <b>700.34</b> |         |         |        | <b>642.36</b> |         |         |        |
| E  | 801.39        | <b>829.38</b> |         |         |        | <b>514.30</b> |         |         |        |
| L  | <b>914.47</b> | <b>942.47</b> |         |         |        | <b>385.26</b> |         |         |        |
| P  | 1011.53       | 1039.52       |         |         |        | <b>272.17</b> |         |         |        |
| R  |               |               |         |         |        | <b>175.12</b> |         |         |        |



#19287468-1 NL: 1.26E5



---

| Reference                          |                |         |   | P      | Score | Coverage | Accession |     |       |       |
|------------------------------------|----------------|---------|---|--------|-------|----------|-----------|-----|-------|-------|
| Scan(s)                            | Sequence       | MH+     | z | P      | XC    | DeltaCn  | Sp        | RSp | Ions  | Count |
| IPI:IPI00423462.5 TREMBL:Q6N092 Ta |                |         |   | 0.0001 | 10.2  | 0.0      | 0         |     |       |       |
| 19287468 - 1                       | R.WLQGSQELPR.E | 1213.63 | 2 | 0.0001 | 3.386 | 0.262    | 1272.1    | 1   | 18/27 | 19    |

1 of 1 peptide matches reported, 0 removed due to filtering

DTA for scans: 19287468-1  
Precursor ion: 607.32  
Mass type: mono  
Mod's: (M\* +15.99492) C=161.01468

Ion series for charge: +1

| AA | A ions        | B ions        | B* ions | Bo ions | C ions | Y ions        | Y* ions | Yo ions | Z ions |
|----|---------------|---------------|---------|---------|--------|---------------|---------|---------|--------|
| W  | 159.09        | 187.09        |         |         |        |               |         |         |        |
| L  | <b>272.18</b> | <b>300.17</b> |         |         |        | 1027.55       |         |         |        |
| Q  | 400.23        | <b>428.23</b> |         |         |        | <b>914.47</b> |         |         |        |
| G  | 457.26        | <b>485.25</b> |         |         |        | <b>786.41</b> |         |         |        |
| S  | 544.29        | <b>572.28</b> |         |         |        | <b>729.39</b> |         |         |        |
| Q  | 672.35        | <b>700.34</b> |         |         |        | <b>642.36</b> |         |         |        |
| E  | 801.39        | <b>829.38</b> |         |         |        | <b>514.30</b> |         |         |        |
| L  | <b>914.47</b> | <b>942.47</b> |         |         |        | <b>385.26</b> |         |         |        |
| P  | 1011.53       | 1039.52       |         |         |        | <b>272.17</b> |         |         |        |
| R  |               |               |         |         |        | <b>175.12</b> |         |         |        |





#19287468-1 NL: 1.26E5



---

| Reference                          |                |         |   | P      | Score | Coverage | Accession |     |       |       |
|------------------------------------|----------------|---------|---|--------|-------|----------|-----------|-----|-------|-------|
| Scan(s)                            | Sequence       | MH+     | z | P      | XC    | DeltaCn  | Sp        | RSp | Ions  | Count |
| IPI:IPI00426060.3 TREMBL:Q6MZW0 Ta |                |         |   | 0.0001 | 10.2  | 0.0      | 0         |     |       |       |
| 19287468 - 1                       | R.WLQGSQELPR.E | 1213.63 | 2 | 0.0001 | 3.386 | 0.262    | 1272.1    | 1   | 18/27 | 19    |

1 of 1 peptide matches reported, 0 removed due to filtering

DTA for scans: 19287468-1  
Precursor ion: 607.32  
Mass type: mono  
Mod's: (M\* +15.99492) C=161.01468

Ion series for charge: +1

| AA | A ions        | B ions        | B* ions | Bo ions | C ions | Y ions        | Y* ions | Yo ions | Z ions |
|----|---------------|---------------|---------|---------|--------|---------------|---------|---------|--------|
| W  | 159.09        | 187.09        |         |         |        |               |         |         |        |
| L  | <b>272.18</b> | <b>300.17</b> |         |         |        | 1027.55       |         |         |        |
| Q  | 400.23        | <b>428.23</b> |         |         |        | <b>914.47</b> |         |         |        |
| G  | 457.26        | <b>485.25</b> |         |         |        | <b>786.41</b> |         |         |        |
| S  | 544.29        | <b>572.28</b> |         |         |        | <b>729.39</b> |         |         |        |
| Q  | 672.35        | <b>700.34</b> |         |         |        | <b>642.36</b> |         |         |        |
| E  | 801.39        | <b>829.38</b> |         |         |        | <b>514.30</b> |         |         |        |
| L  | <b>914.47</b> | <b>942.47</b> |         |         |        | <b>385.26</b> |         |         |        |
| P  | 1011.53       | 1039.52       |         |         |        | <b>272.17</b> |         |         |        |
| R  |               |               |         |         |        | <b>175.12</b> |         |         |        |

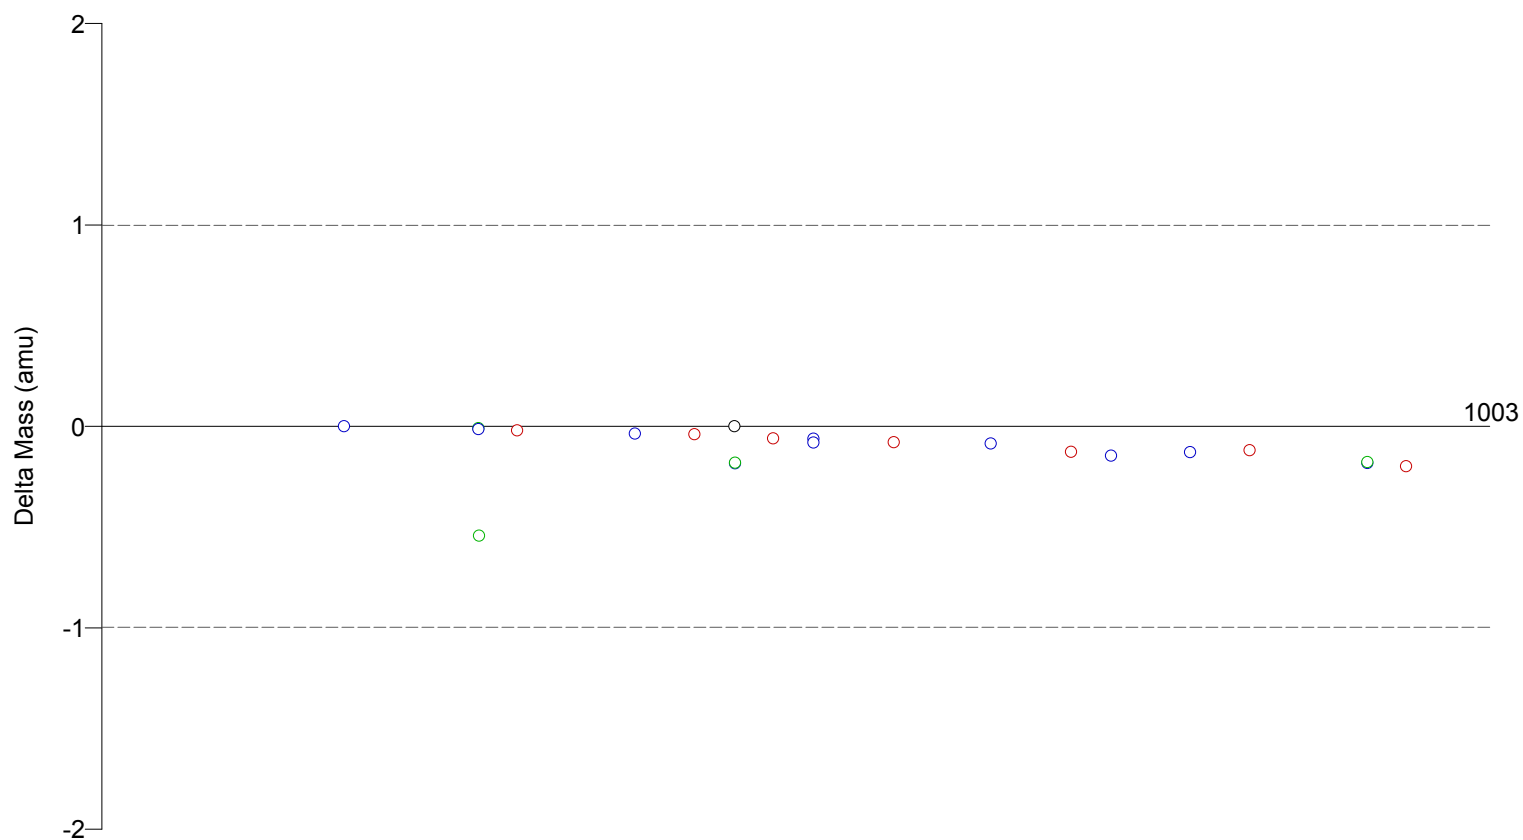

#19287468-1 NL: 1.26E5



---

| Reference                          |                |         |   | P      | Score | Coverage | Accession |     |       |       |
|------------------------------------|----------------|---------|---|--------|-------|----------|-----------|-----|-------|-------|
| Scan(s)                            | Sequence       | MH+     | z | P      | XC    | DeltaCn  | Sp        | RSp | Ions  | Count |
| IPI:IPI00449920.1 SWISS-PROT:P0187 |                |         |   | 0.0001 | 10.2  | 0.0      | 0         |     |       |       |
| 19287468 - 1                       | R.WLQGSQELPR.E | 1213.63 | 2 | 0.0001 | 3.386 | 0.262    | 1272.1    | 1   | 18/27 | 19    |

1 of 1 peptide matches reported, 0 removed due to filtering

DTA for scans: 19287468-1  
Precursor ion: 607.32  
Mass type: mono  
Mod's: (M\* +15.99492) C=161.01468

Ion series for charge: +1

| AA | A ions        | B ions        | B* ions | Bo ions | C ions | Y ions        | Y* ions | Yo ions | Z ions |
|----|---------------|---------------|---------|---------|--------|---------------|---------|---------|--------|
| W  | 159.09        | 187.09        |         |         |        |               |         |         |        |
| L  | <b>272.18</b> | <b>300.17</b> |         |         |        | 1027.55       |         |         |        |
| Q  | 400.23        | <b>428.23</b> |         |         |        | <b>914.47</b> |         |         |        |
| G  | 457.26        | <b>485.25</b> |         |         |        | <b>786.41</b> |         |         |        |
| S  | 544.29        | <b>572.28</b> |         |         |        | <b>729.39</b> |         |         |        |
| Q  | 672.35        | <b>700.34</b> |         |         |        | <b>642.36</b> |         |         |        |
| E  | 801.39        | <b>829.38</b> |         |         |        | <b>514.30</b> |         |         |        |
| L  | <b>914.47</b> | <b>942.47</b> |         |         |        | <b>385.26</b> |         |         |        |
| P  | 1011.53       | 1039.52       |         |         |        | <b>272.17</b> |         |         |        |
| R  |               |               |         |         |        | <b>175.12</b> |         |         |        |



#19287468-1 NL: 1.26E5



---

| Reference                          |                |         |   | P      | Score | Coverage | Accession |     |       |       |
|------------------------------------|----------------|---------|---|--------|-------|----------|-----------|-----|-------|-------|
| Scan(s)                            | Sequence       | MH+     | z | P      | XC    | DeltaCn  | Sp        | RSp | Ions  | Count |
| IPI:IPI00641229.4 SWISS-PROT:P0187 |                |         |   | 0.0001 | 10.2  | 0.0      | 0         |     |       |       |
| 19287468 - 1                       | R.WLQGSQELPR.E | 1213.63 | 2 | 0.0001 | 3.386 | 0.262    | 1272.1    | 1   | 18/27 | 19    |

1 of 1 peptide matches reported, 0 removed due to filtering



DTA for scans: 19287468-1  
Precursor ion: 607.32  
Mass type: mono  
Mod's: (M\* +15.99492) C=161.01468

Ion series for charge: +1

| AA | A ions        | B ions        | B* ions | Bo ions | C ions | Y ions        | Y* ions | Yo ions | Z ions |
|----|---------------|---------------|---------|---------|--------|---------------|---------|---------|--------|
| W  | 159.09        | 187.09        |         |         |        |               |         |         |        |
| L  | <b>272.18</b> | <b>300.17</b> |         |         |        | 1027.55       |         |         |        |
| Q  | 400.23        | <b>428.23</b> |         |         |        | <b>914.47</b> |         |         |        |
| G  | 457.26        | <b>485.25</b> |         |         |        | <b>786.41</b> |         |         |        |
| S  | 544.29        | <b>572.28</b> |         |         |        | <b>729.39</b> |         |         |        |
| Q  | 672.35        | <b>700.34</b> |         |         |        | <b>642.36</b> |         |         |        |
| E  | 801.39        | <b>829.38</b> |         |         |        | <b>514.30</b> |         |         |        |
| L  | <b>914.47</b> | <b>942.47</b> |         |         |        | <b>385.26</b> |         |         |        |
| P  | 1011.53       | 1039.52       |         |         |        | <b>272.17</b> |         |         |        |
| R  |               |               |         |         |        | <b>175.12</b> |         |         |        |



#19287468-1 NL: 1.26E5



---

| Reference                          |                |         |   | P      | Score | Coverage | Accession |     |       |       |
|------------------------------------|----------------|---------|---|--------|-------|----------|-----------|-----|-------|-------|
| Scan(s)                            | Sequence       | MH+     | z | P      | XC    | DeltaCn  | Sp        | RSp | Ions  | Count |
| IPI:IPI00642017.1 TREMBL:Q7Z374 VE |                |         |   | 0.0001 | 10.2  | 0.0      | 0         |     |       |       |
| 19287468 - 1                       | R.WLQGSQELPR.E | 1213.63 | 2 | 0.0001 | 3.386 | 0.262    | 1272.1    | 1   | 18/27 | 19    |

1 of 1 peptide matches reported, 0 removed due to filtering

DTA for scans: 19287468-1  
Precursor ion: 607.32  
Mass type: mono  
Mod's: (M\* +15.99492) C=161.01468

Ion series for charge: +1

| AA | A ions        | B ions        | B* ions | Bo ions | C ions | Y ions        | Y* ions | Yo ions | Z ions |
|----|---------------|---------------|---------|---------|--------|---------------|---------|---------|--------|
| W  | 159.09        | 187.09        |         |         |        |               |         |         |        |
| L  | <b>272.18</b> | <b>300.17</b> |         |         |        | 1027.55       |         |         |        |
| Q  | 400.23        | <b>428.23</b> |         |         |        | <b>914.47</b> |         |         |        |
| G  | 457.26        | <b>485.25</b> |         |         |        | <b>786.41</b> |         |         |        |
| S  | 544.29        | <b>572.28</b> |         |         |        | <b>729.39</b> |         |         |        |
| Q  | 672.35        | <b>700.34</b> |         |         |        | <b>642.36</b> |         |         |        |
| E  | 801.39        | <b>829.38</b> |         |         |        | <b>514.30</b> |         |         |        |
| L  | <b>914.47</b> | <b>942.47</b> |         |         |        | <b>385.26</b> |         |         |        |
| P  | 1011.53       | 1039.52       |         |         |        | <b>272.17</b> |         |         |        |
| R  |               |               |         |         |        | <b>175.12</b> |         |         |        |



#19287468-1 NL: 1.26E5



---

| Reference                          |                |         |   | P      | Score | Coverage | Accession |     |       |       |
|------------------------------------|----------------|---------|---|--------|-------|----------|-----------|-----|-------|-------|
| Scan(s)                            | Sequence       | MH+     | z | P      | XC    | DeltaCn  | Sp        | RSp | Ions  | Count |
| IPI:IPI00644497.4 H-INV:HIT0002157 |                |         |   | 0.0001 | 10.2  | 0.0      | 0         |     |       |       |
| 19287468 - 1                       | R.WLQGSQELPR.E | 1213.63 | 2 | 0.0001 | 3.386 | 0.262    | 1272.1    | 1   | 18/27 | 19    |

1 of 1 peptide matches reported, 0 removed due to filtering

DTA for scans: 19287468-1  
Precursor ion: 607.32  
Mass type: mono  
Mod's: (M\* +15.99492) C=161.01468

Ion series for charge: +1

| AA | A ions        | B ions        | B* ions | Bo ions | C ions | Y ions        | Y* ions | Yo ions | Z ions |
|----|---------------|---------------|---------|---------|--------|---------------|---------|---------|--------|
| W  | 159.09        | 187.09        |         |         |        |               |         |         |        |
| L  | <b>272.18</b> | <b>300.17</b> |         |         |        | 1027.55       |         |         |        |
| Q  | 400.23        | <b>428.23</b> |         |         |        | <b>914.47</b> |         |         |        |
| G  | 457.26        | <b>485.25</b> |         |         |        | <b>786.41</b> |         |         |        |
| S  | 544.29        | <b>572.28</b> |         |         |        | <b>729.39</b> |         |         |        |
| Q  | 672.35        | <b>700.34</b> |         |         |        | <b>642.36</b> |         |         |        |
| E  | 801.39        | <b>829.38</b> |         |         |        | <b>514.30</b> |         |         |        |
| L  | <b>914.47</b> | <b>942.47</b> |         |         |        | <b>385.26</b> |         |         |        |
| P  | 1011.53       | 1039.52       |         |         |        | <b>272.17</b> |         |         |        |
| R  |               |               |         |         |        | <b>175.12</b> |         |         |        |



#19287468-1 NL: 1.26E5





---

| Reference                          |                |         |   | P      | Score | Coverage | Accession |     |       |       |
|------------------------------------|----------------|---------|---|--------|-------|----------|-----------|-----|-------|-------|
| Scan(s)                            | Sequence       | MH+     | z | P      | XC    | DeltaCn  | Sp        | RSp | Ions  | Count |
| IPI:IPI00647704.1 TREMBL:Q6ZW64 Ta |                |         |   | 0.0001 | 10.2  | 0.0      | 0         |     |       |       |
| 19287468 - 1                       | R.WLQGSQELPR.E | 1213.63 | 2 | 0.0001 | 3.386 | 0.262    | 1272.1    | 1   | 18/27 | 19    |

1 of 1 peptide matches reported, 0 removed due to filtering

DTA for scans: 19287468-1  
Precursor ion: 607.32  
Mass type: mono  
Mod's: (M\* +15.99492) C=161.01468

Ion series for charge: +1

| AA | A ions        | B ions        | B* ions | Bo ions | C ions | Y ions        | Y* ions | Yo ions | Z ions |
|----|---------------|---------------|---------|---------|--------|---------------|---------|---------|--------|
| W  | 159.09        | 187.09        |         |         |        |               |         |         |        |
| L  | <b>272.18</b> | <b>300.17</b> |         |         |        | 1027.55       |         |         |        |
| Q  | 400.23        | <b>428.23</b> |         |         |        | <b>914.47</b> |         |         |        |
| G  | 457.26        | <b>485.25</b> |         |         |        | <b>786.41</b> |         |         |        |
| S  | 544.29        | <b>572.28</b> |         |         |        | <b>729.39</b> |         |         |        |
| Q  | 672.35        | <b>700.34</b> |         |         |        | <b>642.36</b> |         |         |        |
| E  | 801.39        | <b>829.38</b> |         |         |        | <b>514.30</b> |         |         |        |
| L  | <b>914.47</b> | <b>942.47</b> |         |         |        | <b>385.26</b> |         |         |        |
| P  | 1011.53       | 1039.52       |         |         |        | <b>272.17</b> |         |         |        |
| R  |               |               |         |         |        | <b>175.12</b> |         |         |        |



#19287468-1 NL: 1.26E5



---

| Reference                          |                |         |   | P      | Score | Coverage | Accession |     |       |       |
|------------------------------------|----------------|---------|---|--------|-------|----------|-----------|-----|-------|-------|
| Scan(s)                            | Sequence       | MH+     | z | P      | XC    | DeltaCn  | Sp        | RSp | Ions  | Count |
| IPI:IPI00784758.1 TREMBL:Q6MZX9 Ta |                |         |   | 0.0001 | 10.2  | 0.0      | 0         |     |       |       |
| 19287468 - 1                       | R.WLQGSQELPR.E | 1213.63 | 2 | 0.0001 | 3.386 | 0.262    | 1272.1    | 1   | 18/27 | 19    |

1 of 1 peptide matches reported, 0 removed due to filtering

DTA for scans: 19287468-1  
Precursor ion: 607.32  
Mass type: mono  
Mod's: (M\* +15.99492) C=161.01468

Ion series for charge: +1

| AA | A ions        | B ions        | B* ions | Bo ions | C ions | Y ions        | Y* ions | Yo ions | Z ions |
|----|---------------|---------------|---------|---------|--------|---------------|---------|---------|--------|
| W  | 159.09        | 187.09        |         |         |        |               |         |         |        |
| L  | <b>272.18</b> | <b>300.17</b> |         |         |        | 1027.55       |         |         |        |
| Q  | 400.23        | <b>428.23</b> |         |         |        | <b>914.47</b> |         |         |        |
| G  | 457.26        | <b>485.25</b> |         |         |        | <b>786.41</b> |         |         |        |
| S  | 544.29        | <b>572.28</b> |         |         |        | <b>729.39</b> |         |         |        |
| Q  | 672.35        | <b>700.34</b> |         |         |        | <b>642.36</b> |         |         |        |
| E  | 801.39        | <b>829.38</b> |         |         |        | <b>514.30</b> |         |         |        |
| L  | <b>914.47</b> | <b>942.47</b> |         |         |        | <b>385.26</b> |         |         |        |
| P  | 1011.53       | 1039.52       |         |         |        | <b>272.17</b> |         |         |        |
| R  |               |               |         |         |        | <b>175.12</b> |         |         |        |



#19287468-1 NL: 1.26E5



---

| Reference                          |                |         |   | P      | Score | Coverage | Accession |     |       |       |
|------------------------------------|----------------|---------|---|--------|-------|----------|-----------|-----|-------|-------|
| Scan(s)                            | Sequence       | MH+     | z | P      | XC    | DeltaCn  | Sp        | RSp | Ions  | Count |
| IPI:IPI00784830.1 TREMBL:Q6ZVX0 Ta |                |         |   | 0.0001 | 10.2  | 0.0      | 0         |     |       |       |
| 19287468 - 1                       | R.WLQGSQELPR.E | 1213.63 | 2 | 0.0001 | 3.386 | 0.262    | 1272.1    | 1   | 18/27 | 19    |

1 of 1 peptide matches reported, 0 removed due to filtering

DTA for scans: 19287468-1  
Precursor ion: 607.32  
Mass type: mono  
Mod's: (M\* +15.99492) C=161.01468

Ion series for charge: +1

| AA | A ions        | B ions        | B* ions | Bo ions | C ions | Y ions        | Y* ions | Yo ions | Z ions |
|----|---------------|---------------|---------|---------|--------|---------------|---------|---------|--------|
| W  | 159.09        | 187.09        |         |         |        |               |         |         |        |
| L  | <b>272.18</b> | <b>300.17</b> |         |         |        | 1027.55       |         |         |        |
| Q  | 400.23        | <b>428.23</b> |         |         |        | <b>914.47</b> |         |         |        |
| G  | 457.26        | <b>485.25</b> |         |         |        | <b>786.41</b> |         |         |        |
| S  | 544.29        | <b>572.28</b> |         |         |        | <b>729.39</b> |         |         |        |
| Q  | 672.35        | <b>700.34</b> |         |         |        | <b>642.36</b> |         |         |        |
| E  | 801.39        | <b>829.38</b> |         |         |        | <b>514.30</b> |         |         |        |
| L  | <b>914.47</b> | <b>942.47</b> |         |         |        | <b>385.26</b> |         |         |        |
| P  | 1011.53       | 1039.52       |         |         |        | <b>272.17</b> |         |         |        |
| R  |               |               |         |         |        | <b>175.12</b> |         |         |        |





#19287468-1 NL: 1.26E5



---

| Reference                          |                |         |   | P      | Score | Coverage | Accession |     |       |       |
|------------------------------------|----------------|---------|---|--------|-------|----------|-----------|-----|-------|-------|
| Scan(s)                            | Sequence       | MH+     | z | P      | XC    | DeltaCn  | Sp        | RSp | Ions  | Count |
| IPI:IPI00785067.1 TREMBL:Q6P089 Ta |                |         |   | 0.0001 | 10.2  | 0.0      | 0         |     |       |       |
| 19287468 - 1                       | R.WLQGSQELPR.E | 1213.63 | 2 | 0.0001 | 3.386 | 0.262    | 1272.1    | 1   | 18/27 | 19    |

1 of 1 peptide matches reported, 0 removed due to filtering

DTA for scans: 19287468-1  
Precursor ion: 607.32  
Mass type: mono  
Mod's: (M\* +15.99492) C=161.01468

Ion series for charge: +1

| AA | A ions        | B ions        | B* ions | Bo ions | C ions | Y ions        | Y* ions | Yo ions | Z ions |
|----|---------------|---------------|---------|---------|--------|---------------|---------|---------|--------|
| W  | 159.09        | 187.09        |         |         |        |               |         |         |        |
| L  | <b>272.18</b> | <b>300.17</b> |         |         |        | 1027.55       |         |         |        |
| Q  | 400.23        | <b>428.23</b> |         |         |        | <b>914.47</b> |         |         |        |
| G  | 457.26        | <b>485.25</b> |         |         |        | <b>786.41</b> |         |         |        |
| S  | 544.29        | <b>572.28</b> |         |         |        | <b>729.39</b> |         |         |        |
| Q  | 672.35        | <b>700.34</b> |         |         |        | <b>642.36</b> |         |         |        |
| E  | 801.39        | <b>829.38</b> |         |         |        | <b>514.30</b> |         |         |        |
| L  | <b>914.47</b> | <b>942.47</b> |         |         |        | <b>385.26</b> |         |         |        |
| P  | 1011.53       | 1039.52       |         |         |        | <b>272.17</b> |         |         |        |
| R  |               |               |         |         |        | <b>175.12</b> |         |         |        |



#19287468-1 NL: 1.26E5



---

| Reference                          |                |         |   | P      | Score | Coverage | Accession |     |       |       |
|------------------------------------|----------------|---------|---|--------|-------|----------|-----------|-----|-------|-------|
| Scan(s)                            | Sequence       | MH+     | z | P      | XC    | DeltaCn  | Sp        | RSp | Ions  | Count |
| IPI:IPI00829711.1 TREMBL:A6NE94 EN |                |         |   | 0.0001 | 10.2  | 0.0      | 0         |     |       |       |
| 19287468 - 1                       | R.WLQGSQELPR.E | 1213.63 | 2 | 0.0001 | 3.386 | 0.262    | 1272.1    | 1   | 18/27 | 19    |

1 of 1 peptide matches reported, 0 removed due to filtering

DTA for scans: 19287468-1  
Precursor ion: 607.32  
Mass type: mono  
Mod's: (M\* +15.99492) C=161.01468

Ion series for charge: +1

| AA | A ions        | B ions        | B* ions | Bo ions | C ions | Y ions        | Y* ions | Yo ions | Z ions |
|----|---------------|---------------|---------|---------|--------|---------------|---------|---------|--------|
| W  | 159.09        | 187.09        |         |         |        |               |         |         |        |
| L  | <b>272.18</b> | <b>300.17</b> |         |         |        | 1027.55       |         |         |        |
| Q  | 400.23        | <b>428.23</b> |         |         |        | <b>914.47</b> |         |         |        |
| G  | 457.26        | <b>485.25</b> |         |         |        | <b>786.41</b> |         |         |        |
| S  | 544.29        | <b>572.28</b> |         |         |        | <b>729.39</b> |         |         |        |
| Q  | 672.35        | <b>700.34</b> |         |         |        | <b>642.36</b> |         |         |        |
| E  | 801.39        | <b>829.38</b> |         |         |        | <b>514.30</b> |         |         |        |
| L  | <b>914.47</b> | <b>942.47</b> |         |         |        | <b>385.26</b> |         |         |        |
| P  | 1011.53       | 1039.52       |         |         |        | <b>272.17</b> |         |         |        |
| R  |               |               |         |         |        | <b>175.12</b> |         |         |        |



#19287468-1 NL: 1.26E5



---

| Reference                          |                |         |   | P      | Score | Coverage | Accession |     |       |       |
|------------------------------------|----------------|---------|---|--------|-------|----------|-----------|-----|-------|-------|
| Scan(s)                            | Sequence       | MH+     | z | P      | XC    | DeltaCn  | Sp        | RSp | Ions  | Count |
| IPI:IPI00893853.1 VEGA:OTTHUMP0000 |                |         |   | 0.0001 | 10.2  | 0.0      | 0         |     |       |       |
| 19287468 - 1                       | R.WLQGSQELPR.E | 1213.63 | 2 | 0.0001 | 3.386 | 0.262    | 1272.1    | 1   | 18/27 | 19    |

1 of 1 peptide matches reported, 0 removed due to filtering



DTA for scans: 19287468-1  
Precursor ion: 607.32  
Mass type: mono  
Mod's: (M\* +15.99492) C=161.01468

Ion series for charge: +1

| AA | A ions        | B ions        | B* ions | Bo ions | C ions | Y ions        | Y* ions | Yo ions | Z ions |
|----|---------------|---------------|---------|---------|--------|---------------|---------|---------|--------|
| W  | 159.09        | 187.09        |         |         |        |               |         |         |        |
| L  | <b>272.18</b> | <b>300.17</b> |         |         |        | 1027.55       |         |         |        |
| Q  | 400.23        | <b>428.23</b> |         |         |        | <b>914.47</b> |         |         |        |
| G  | 457.26        | <b>485.25</b> |         |         |        | <b>786.41</b> |         |         |        |
| S  | 544.29        | <b>572.28</b> |         |         |        | <b>729.39</b> |         |         |        |
| Q  | 672.35        | <b>700.34</b> |         |         |        | <b>642.36</b> |         |         |        |
| E  | 801.39        | <b>829.38</b> |         |         |        | <b>514.30</b> |         |         |        |
| L  | <b>914.47</b> | <b>942.47</b> |         |         |        | <b>385.26</b> |         |         |        |
| P  | 1011.53       | 1039.52       |         |         |        | <b>272.17</b> |         |         |        |
| R  |               |               |         |         |        | <b>175.12</b> |         |         |        |



#19287468-1 NL: 1.26E5



---

| Reference                          |                |         |   | P      | Score | Coverage | Accession |     |       |       |
|------------------------------------|----------------|---------|---|--------|-------|----------|-----------|-----|-------|-------|
| Scan(s)                            | Sequence       | MH+     | z | P      | XC    | DeltaCn  | Sp        | RSp | Ions  | Count |
| IPI:IPI00894384.1 TREMBL:Q6N041;Q9 |                |         |   | 0.0001 | 10.2  | 0.0      | 0         |     |       |       |
| 19287468 - 1                       | R.WLQGSQELPR.E | 1213.63 | 2 | 0.0001 | 3.386 | 0.262    | 1272.1    | 1   | 18/27 | 19    |

1 of 1 peptide matches reported, 0 removed due to filtering

DTA for scans: 19287468-1  
Precursor ion: 607.32  
Mass type: mono  
Mod's: (M\* +15.99492) C=161.01468

Ion series for charge: +1

| AA | A ions        | B ions        | B* ions | Bo ions | C ions | Y ions        | Y* ions | Yo ions | Z ions |
|----|---------------|---------------|---------|---------|--------|---------------|---------|---------|--------|
| W  | 159.09        | 187.09        |         |         |        |               |         |         |        |
| L  | <b>272.18</b> | <b>300.17</b> |         |         |        | 1027.55       |         |         |        |
| Q  | 400.23        | <b>428.23</b> |         |         |        | <b>914.47</b> |         |         |        |
| G  | 457.26        | <b>485.25</b> |         |         |        | <b>786.41</b> |         |         |        |
| S  | 544.29        | <b>572.28</b> |         |         |        | <b>729.39</b> |         |         |        |
| Q  | 672.35        | <b>700.34</b> |         |         |        | <b>642.36</b> |         |         |        |
| E  | 801.39        | <b>829.38</b> |         |         |        | <b>514.30</b> |         |         |        |
| L  | <b>914.47</b> | <b>942.47</b> |         |         |        | <b>385.26</b> |         |         |        |
| P  | 1011.53       | 1039.52       |         |         |        | <b>272.17</b> |         |         |        |
| R  |               |               |         |         |        | <b>175.12</b> |         |         |        |



#19287468-1 NL: 1.26E5



---

| Reference                           |                            |         |   | P      | Score | Coverage | Accession |     |       |       |  |
|-------------------------------------|----------------------------|---------|---|--------|-------|----------|-----------|-----|-------|-------|--|
| Scan(s)                             | Sequence                   | MH+     | z | P      | XC    | DeltaCn  | Sp        | RSp | Ions  | Count |  |
| IPI:IPI00032258.4 SWISS-PROT:POCOL4 | Tax_Id=9606 Gene_Symbol=C4 |         |   | 0.0002 | 10.2  | 0.0      | 0         |     |       |       |  |
| 2118291816 -                        | K.ITQVLHFTK.D              | 1086.63 | 2 | 0.0002 | 3.684 | 0.435    | 1215.2    | 1   | 18/24 | 10    |  |

1 of 1 peptide matches reported, 0 removed due to filtering

DTA for scans: 2118291816-26226248  
Precursor ion: 543.82  
Mass type: mono  
Mod's: (M\* +15.99492) C=161.01468

Ion series for charge: +1

| AA | A ions        | B ions        | B* ions | Bo ions | C ions | Y ions        | Y* ions | Yo ions | Z ions |
|----|---------------|---------------|---------|---------|--------|---------------|---------|---------|--------|
| I  | 86.10         | 114.09        |         |         |        |               |         |         |        |
| T  | <b>187.14</b> | <b>215.14</b> |         |         |        | <b>973.55</b> |         |         |        |
| Q  | 315.20        | <b>343.20</b> |         |         |        | <b>872.50</b> |         |         |        |
| V  | <b>414.27</b> | <b>442.27</b> |         |         |        | <b>744.44</b> |         |         |        |
| L  | <b>527.36</b> | <b>555.35</b> |         |         |        | <b>645.37</b> |         |         |        |
| H  | <b>664.41</b> | <b>692.41</b> |         |         |        | <b>532.29</b> |         |         |        |
| F  | 811.48        | <b>839.48</b> |         |         |        | <b>395.23</b> |         |         |        |
| T  | 912.53        | <b>940.53</b> |         |         |        | <b>248.16</b> |         |         |        |
| K  |               |               |         |         |        | 147.11        |         |         |        |



#2118291816-26226248 NL: 1.21E5





---

| Reference                          |          |         |   | P      | Score | Coverage | Accession |     |       |       |
|------------------------------------|----------|---------|---|--------|-------|----------|-----------|-----|-------|-------|
| Scan(s)                            | Sequence | MH+     | z | P      | XC    | DeltaCn  | Sp        | RSp | Ions  | Count |
| IPI:IPI00654875.1 SWISS-PROT:POCOL |          |         |   | 0.0002 | 10.2  | 0.0      |           | 0   |       |       |
| 2118291816 - K.ITQVLHFTK.D         |          | 1086.63 | 2 | 0.0002 | 3.684 | 0.435    | 1215.2    | 1   | 18/24 | 10    |

1 of 1 peptide matches reported, 0 removed due to filtering

DTA for scans: 2118291816-26226248  
Precursor ion: 543.82  
Mass type: mono  
Mod's: (M\* +15.99492) C=161.01468

Ion series for charge: +1

| AA | A ions        | B ions        | B* ions | Bo ions | C ions | Y ions        | Y* ions | Yo ions | Z ions |
|----|---------------|---------------|---------|---------|--------|---------------|---------|---------|--------|
| I  | 86.10         | 114.09        |         |         |        |               |         |         |        |
| T  | <b>187.14</b> | <b>215.14</b> |         |         |        | <b>973.55</b> |         |         |        |
| Q  | 315.20        | <b>343.20</b> |         |         |        | <b>872.50</b> |         |         |        |
| V  | <b>414.27</b> | <b>442.27</b> |         |         |        | <b>744.44</b> |         |         |        |
| L  | <b>527.36</b> | <b>555.35</b> |         |         |        | <b>645.37</b> |         |         |        |
| H  | <b>664.41</b> | <b>692.41</b> |         |         |        | <b>532.29</b> |         |         |        |
| F  | 811.48        | <b>839.48</b> |         |         |        | <b>395.23</b> |         |         |        |
| T  | 912.53        | <b>940.53</b> |         |         |        | <b>248.16</b> |         |         |        |
| K  |               |               |         |         |        | 147.11        |         |         |        |

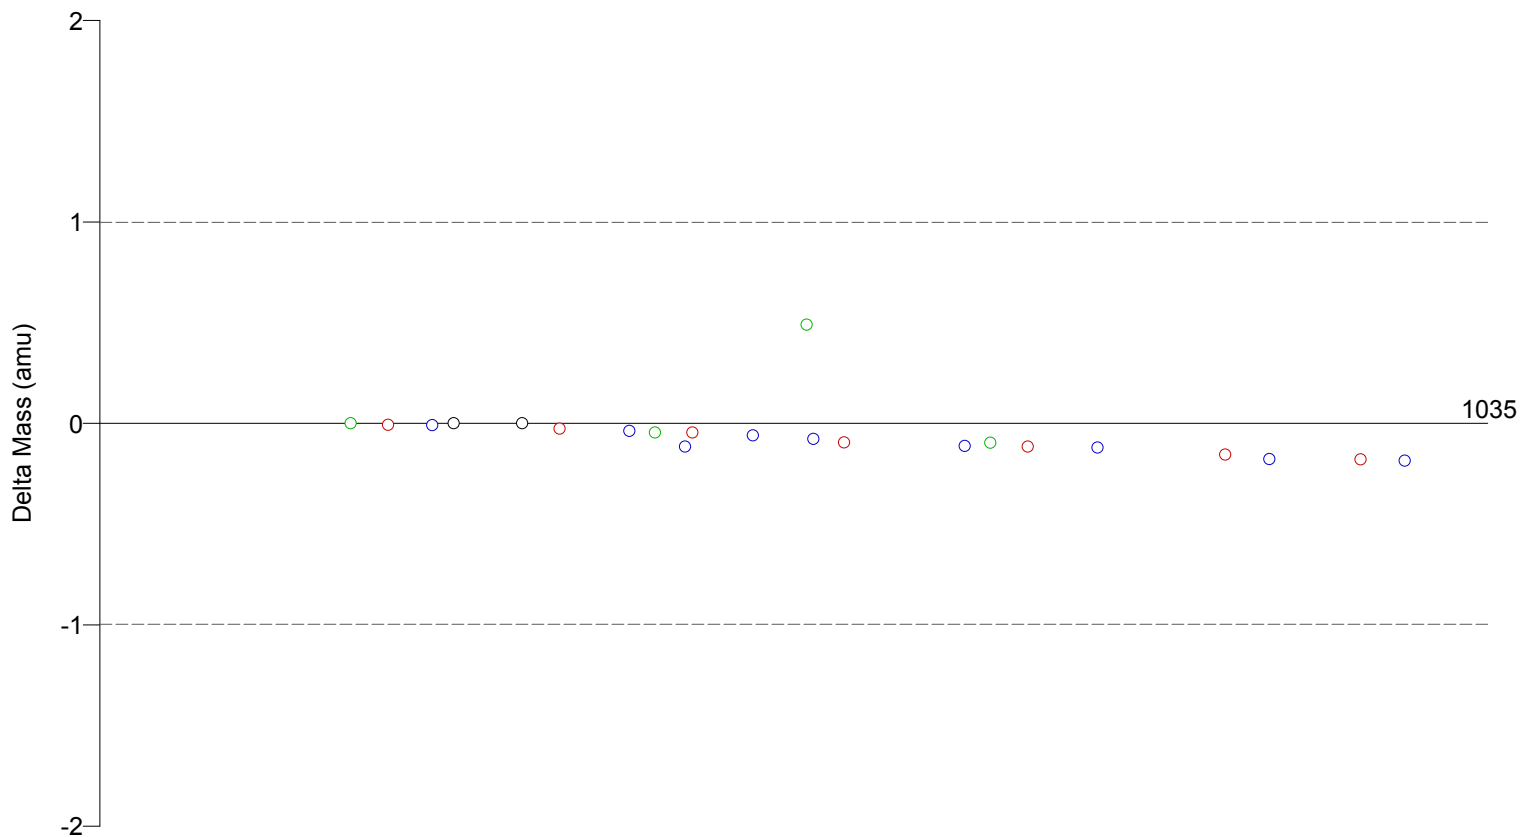

#2118291816-26226248 NL: 1.21E5



---

| Reference                          |          |         |   | P      | Score | Coverage | Accession |     |       |       |
|------------------------------------|----------|---------|---|--------|-------|----------|-----------|-----|-------|-------|
| Scan(s)                            | Sequence | MH+     | z | P      | XC    | DeltaCn  | Sp        | RSp | Ions  | Count |
| IPI:IPI00935601.1 TREMBL:Q9UM89 EN |          |         |   | 0.0002 | 10.2  | 0.0      | 0         |     |       |       |
| 2118291816 - K.ITQVLHFTK.D         |          | 1086.63 | 2 | 0.0002 | 3.684 | 0.435    | 1215.2    | 1   | 18/24 | 10    |

1 of 1 peptide matches reported, 0 removed due to filtering

DTA for scans: 2118291816-26226248  
Precursor ion: 543.82  
Mass type: mono  
Mod's: (M\* +15.99492) C=161.01468

Ion series for charge: +1

| AA | A ions        | B ions        | B* ions | Bo ions | C ions | Y ions        | Y* ions | Yo ions | Z ions |
|----|---------------|---------------|---------|---------|--------|---------------|---------|---------|--------|
| I  | 86.10         | 114.09        |         |         |        |               |         |         |        |
| T  | <b>187.14</b> | <b>215.14</b> |         |         |        | <b>973.55</b> |         |         |        |
| Q  | 315.20        | <b>343.20</b> |         |         |        | <b>872.50</b> |         |         |        |
| V  | <b>414.27</b> | <b>442.27</b> |         |         |        | <b>744.44</b> |         |         |        |
| L  | <b>527.36</b> | <b>555.35</b> |         |         |        | <b>645.37</b> |         |         |        |
| H  | <b>664.41</b> | <b>692.41</b> |         |         |        | <b>532.29</b> |         |         |        |
| F  | 811.48        | <b>839.48</b> |         |         |        | <b>395.23</b> |         |         |        |
| T  | 912.53        | <b>940.53</b> |         |         |        | <b>248.16</b> |         |         |        |
| K  |               |               |         |         |        | 147.11        |         |         |        |



#2118291816-26226248 NL: 1.21E5



---

| Reference                                                      |          |         |   | P      | Score | Coverage | Accession |     |       |       |
|----------------------------------------------------------------|----------|---------|---|--------|-------|----------|-----------|-----|-------|-------|
| Scan(s)                                                        | Sequence | MH+     | z | P      | XC    | DeltaCn  | Sp        | RSp | Ions  | Count |
| IPI:IPI00032328.2 SWISS-PROT:P01042-1 TREMBL:B4E1C2 ENSEMBL:EN |          |         |   | 0.0003 | 10.2  | 0.0      | 0         |     |       |       |
| 2118291816 - K.TVGSDFYFSFK.Y                                   |          | 1251.59 | 2 | 0.0003 | 3.649 | 0.643    | 417.3     | 1   | 18/30 | 4     |

1 of 1 peptide matches reported, 0 removed due to filtering

DTA for scans: 2118291816-26226248  
Precursor ion: 626.30  
Mass type: mono  
Mod's: (M\* +15.99492) C=161.01468

Ion series for charge: +1

| AA | A ions        | B ions        | B* ions | Bo ions | C ions | Y ions         | Y* ions | Yo ions | Z ions |
|----|---------------|---------------|---------|---------|--------|----------------|---------|---------|--------|
| T  | 74.06         | 102.05        |         |         |        |                |         |         |        |
| V  | <b>173.13</b> | <b>201.12</b> |         |         |        | 1150.54        |         |         |        |
| G  | 230.15        | <b>258.14</b> |         |         |        | <b>1051.47</b> |         |         |        |
| S  | 317.18        | <b>345.18</b> |         |         |        | <b>994.45</b>  |         |         |        |
| D  | 432.21        | <b>460.20</b> |         |         |        | <b>907.42</b>  |         |         |        |
| T  | 533.26        | <b>561.25</b> |         |         |        | <b>792.39</b>  |         |         |        |
| F  | 680.32        | <b>708.32</b> |         |         |        | <b>691.34</b>  |         |         |        |
| Y  | 843.39        | <b>871.38</b> |         |         |        | <b>544.28</b>  |         |         |        |
| S  | 930.42        | 958.42        |         |         |        | <b>381.21</b>  |         |         |        |
| F  | 1077.49       | 1105.48       |         |         |        | <b>294.18</b>  |         |         |        |
| K  |               |               |         |         |        | 147.11         |         |         |        |



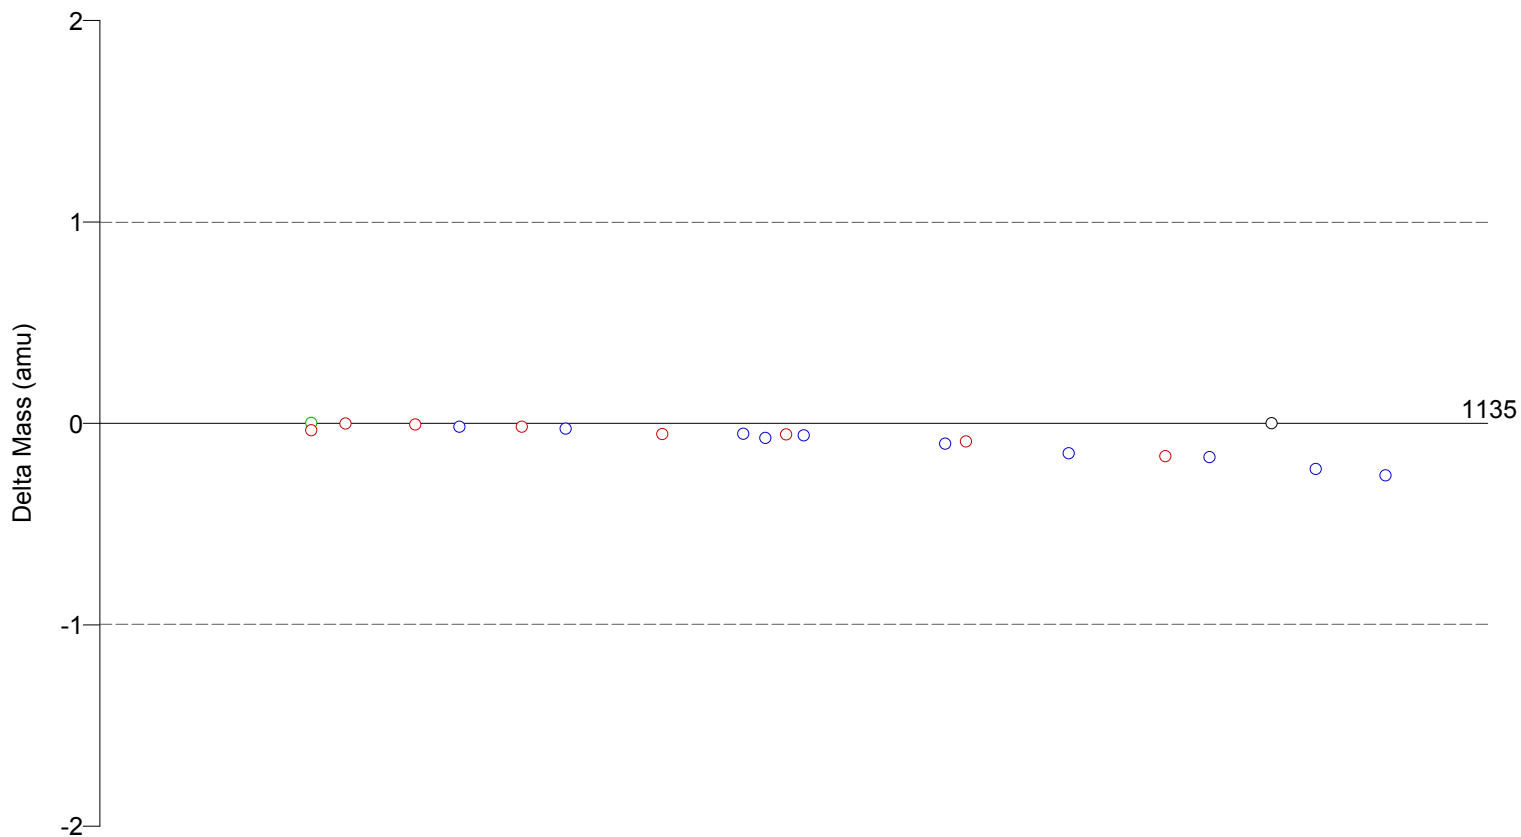

#2118291816-26226248 NL: 2.31E5

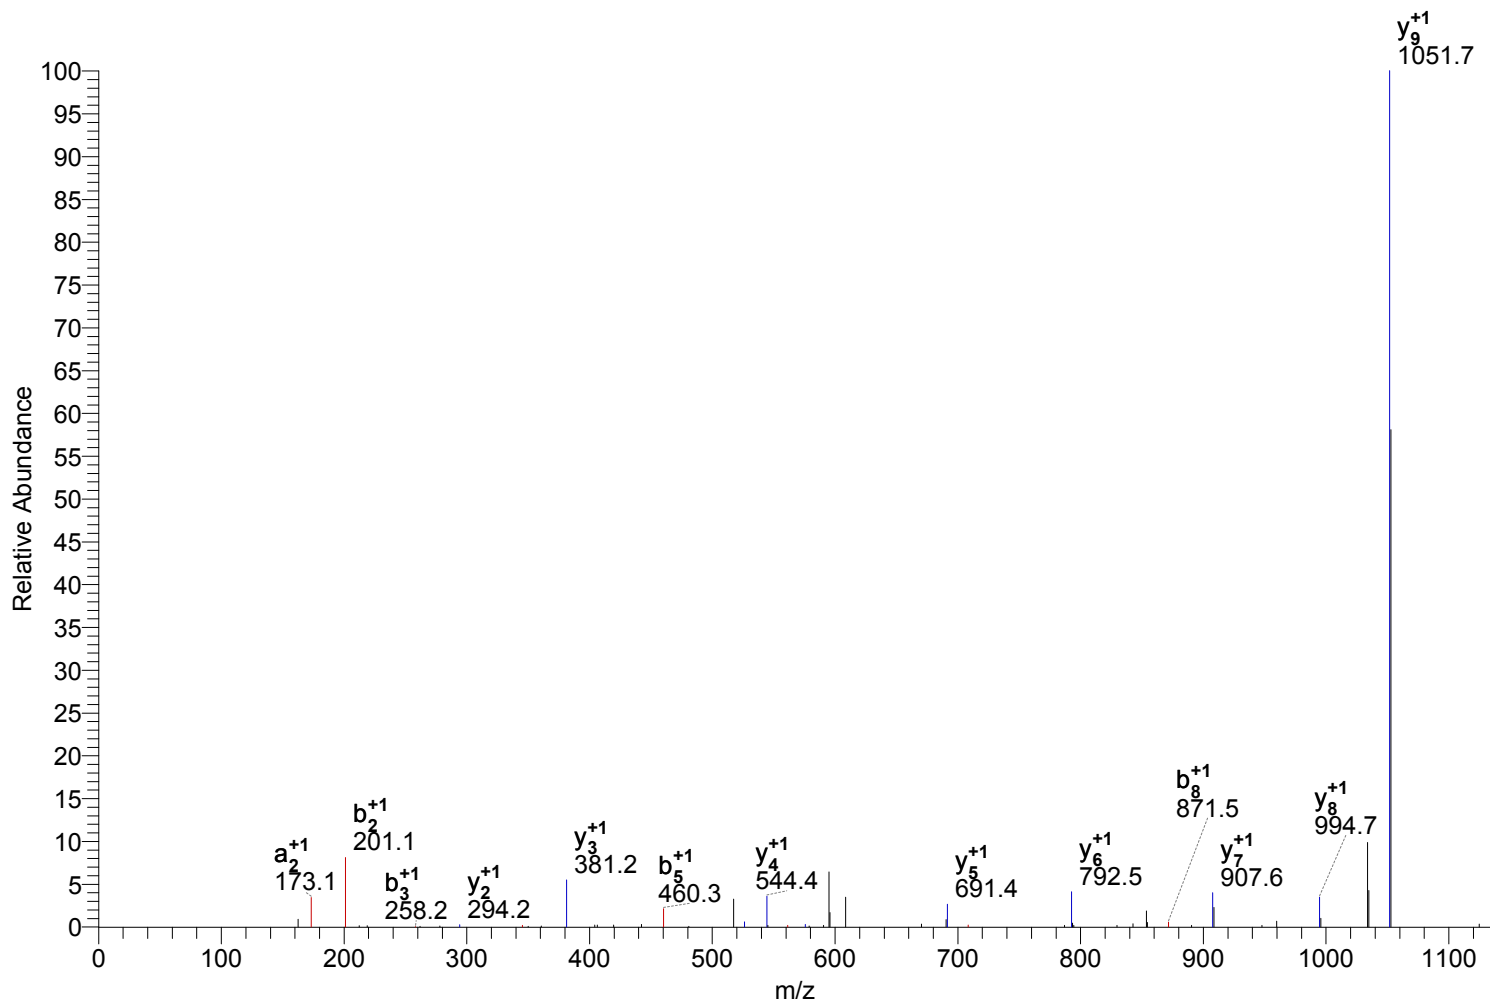

---

| Reference                          |                 |         |   | P      | Score | Coverage | Accession |     |       |       |
|------------------------------------|-----------------|---------|---|--------|-------|----------|-----------|-----|-------|-------|
| Scan(s)                            | Sequence        | MH+     | z | P      | XC    | DeltaCn  | Sp        | RSp | Ions  | Count |
| IPI:IPI00215894.1 SWISS-PROT:P0104 |                 |         |   | 0.0003 | 10.2  | 0.0      | 0         |     |       |       |
| 2118291816 -                       | K.TVGSDFYFSFK.Y | 1251.59 | 2 | 0.0003 | 3.649 | 0.643    | 417.3     | 1   | 18/30 | 4     |

1 of 1 peptide matches reported, 0 removed due to filtering

DTA for scans: 2118291816-26226248  
Precursor ion: 626.30  
Mass type: mono  
Mod's: (M\* +15.99492) C=161.01468

Ion series for charge: +1

| AA | A ions        | B ions        | B* ions | Bo ions | C ions | Y ions         | Y* ions | Yo ions | Z ions |
|----|---------------|---------------|---------|---------|--------|----------------|---------|---------|--------|
| T  | 74.06         | 102.05        |         |         |        |                |         |         |        |
| V  | <b>173.13</b> | <b>201.12</b> |         |         |        | 1150.54        |         |         |        |
| G  | 230.15        | <b>258.14</b> |         |         |        | <b>1051.47</b> |         |         |        |
| S  | 317.18        | <b>345.18</b> |         |         |        | <b>994.45</b>  |         |         |        |
| D  | 432.21        | <b>460.20</b> |         |         |        | <b>907.42</b>  |         |         |        |
| T  | 533.26        | <b>561.25</b> |         |         |        | <b>792.39</b>  |         |         |        |
| F  | 680.32        | <b>708.32</b> |         |         |        | <b>691.34</b>  |         |         |        |
| Y  | 843.39        | <b>871.38</b> |         |         |        | <b>544.28</b>  |         |         |        |
| S  | 930.42        | 958.42        |         |         |        | <b>381.21</b>  |         |         |        |
| F  | 1077.49       | 1105.48       |         |         |        | <b>294.18</b>  |         |         |        |
| K  |               |               |         |         |        | 147.11         |         |         |        |



#2118291816-26226248 NL: 2.31E5



---

| Reference                          |                 |         |   | P      | Score | Coverage | Accession |     |       |       |
|------------------------------------|-----------------|---------|---|--------|-------|----------|-----------|-----|-------|-------|
| Scan(s)                            | Sequence        | MH+     | z | P      | XC    | DeltaCn  | Sp        | RSp | Ions  | Count |
| IPI:IPI00797097.1 VEGA:OTTHUMP0000 |                 |         |   | 0.0003 | 10.2  | 0.0      | 0         |     |       |       |
| 2118291816 -                       | K.TVGSDFYFSFK.Y | 1251.59 | 2 | 0.0003 | 3.649 | 0.643    | 417.3     | 1   | 18/30 | 4     |

1 of 1 peptide matches reported, 0 removed due to filtering

DTA for scans: 2118291816-26226248  
Precursor ion: 626.30  
Mass type: mono  
Mod's: (M\* +15.99492) C=161.01468

Ion series for charge: +1

| AA | A ions        | B ions        | B* ions | Bo ions | C ions | Y ions         | Y* ions | Yo ions | Z ions |
|----|---------------|---------------|---------|---------|--------|----------------|---------|---------|--------|
| T  | 74.06         | 102.05        |         |         |        |                |         |         |        |
| V  | <b>173.13</b> | <b>201.12</b> |         |         |        | 1150.54        |         |         |        |
| G  | 230.15        | <b>258.14</b> |         |         |        | <b>1051.47</b> |         |         |        |
| S  | 317.18        | <b>345.18</b> |         |         |        | <b>994.45</b>  |         |         |        |
| D  | 432.21        | <b>460.20</b> |         |         |        | <b>907.42</b>  |         |         |        |
| T  | 533.26        | <b>561.25</b> |         |         |        | <b>792.39</b>  |         |         |        |
| F  | 680.32        | <b>708.32</b> |         |         |        | <b>691.34</b>  |         |         |        |
| Y  | 843.39        | <b>871.38</b> |         |         |        | <b>544.28</b>  |         |         |        |
| S  | 930.42        | 958.42        |         |         |        | <b>381.21</b>  |         |         |        |
| F  | 1077.49       | 1105.48       |         |         |        | <b>294.18</b>  |         |         |        |
| K  |               |               |         |         |        | 147.11         |         |         |        |



#2118291816-26226248 NL: 2.31E5



---

| Reference                          |                 |         |   | P      | Score | Coverage | Accession |     |       |       |
|------------------------------------|-----------------|---------|---|--------|-------|----------|-----------|-----|-------|-------|
| Scan(s)                            | Sequence        | MH+     | z | P      | XC    | DeltaCn  | Sp        | RSp | Ions  | Count |
| IPI:IPI00797833.4 VEGA:OTTHUMP0000 |                 |         |   | 0.0003 | 10.2  | 0.0      | 0         |     |       |       |
| 2118291816 -                       | K.TVGSDFYFSFK.Y | 1251.59 | 2 | 0.0003 | 3.649 | 0.643    | 417.3     | 1   | 18/30 | 4     |

1 of 1 peptide matches reported, 0 removed due to filtering



DTA for scans: 2118291816-26226248  
Precursor ion: 626.30  
Mass type: mono  
Mod's: (M\* +15.99492) C=161.01468

Ion series for charge: +1

| AA | A ions        | B ions        | B* ions | Bo ions | C ions | Y ions         | Y* ions | Yo ions | Z ions |
|----|---------------|---------------|---------|---------|--------|----------------|---------|---------|--------|
| T  | 74.06         | 102.05        |         |         |        |                |         |         |        |
| V  | <b>173.13</b> | <b>201.12</b> |         |         |        | 1150.54        |         |         |        |
| G  | 230.15        | <b>258.14</b> |         |         |        | <b>1051.47</b> |         |         |        |
| S  | 317.18        | <b>345.18</b> |         |         |        | <b>994.45</b>  |         |         |        |
| D  | 432.21        | <b>460.20</b> |         |         |        | <b>907.42</b>  |         |         |        |
| T  | 533.26        | <b>561.25</b> |         |         |        | <b>792.39</b>  |         |         |        |
| F  | 680.32        | <b>708.32</b> |         |         |        | <b>691.34</b>  |         |         |        |
| Y  | 843.39        | <b>871.38</b> |         |         |        | <b>544.28</b>  |         |         |        |
| S  | 930.42        | 958.42        |         |         |        | <b>381.21</b>  |         |         |        |
| F  | 1077.49       | 1105.48       |         |         |        | <b>294.18</b>  |         |         |        |
| K  |               |               |         |         |        | 147.11         |         |         |        |



#2118291816-26226248 NL: 2.31E5

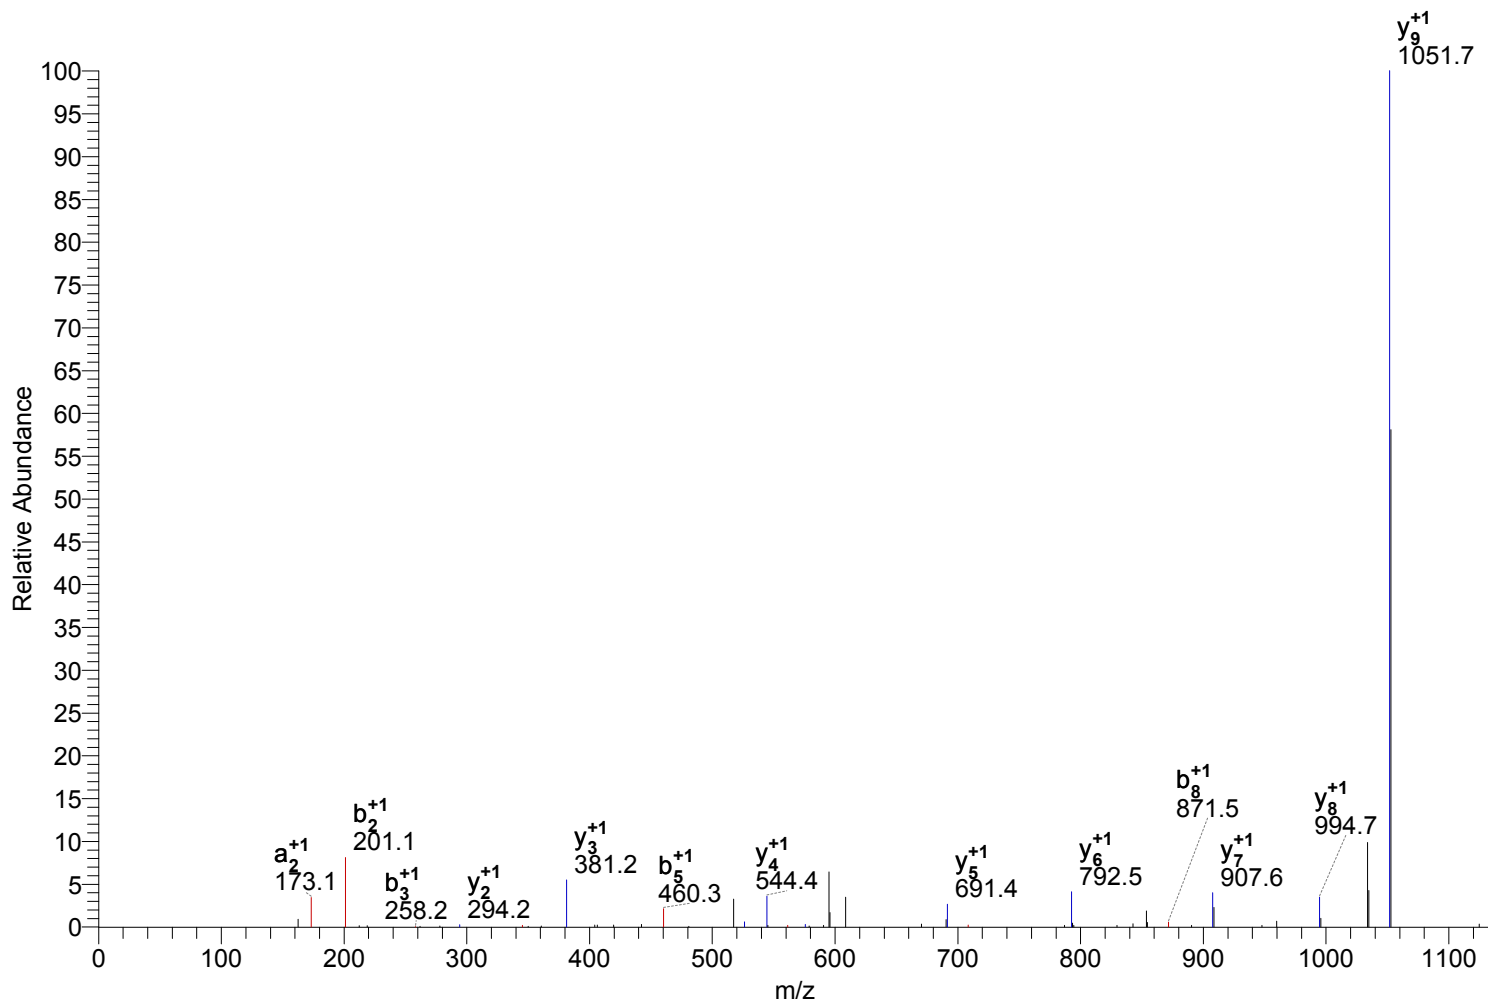

---

| Reference                          |                 |         |   | P      | Score | Coverage | Accession |     |       |       |
|------------------------------------|-----------------|---------|---|--------|-------|----------|-----------|-----|-------|-------|
| Scan(s)                            | Sequence        | MH+     | z | P      | XC    | DeltaCn  | Sp        | RSp | Ions  | Count |
| IPI:IPI00924859.1 VEGA:OTTHUMP0000 |                 |         |   | 0.0003 | 10.2  | 0.0      | 0         |     |       |       |
| 2118291816 -                       | K.TVGSDFYFSFK.Y | 1251.59 | 2 | 0.0003 | 3.649 | 0.643    | 417.3     | 1   | 18/30 | 4     |

1 of 1 peptide matches reported, 0 removed due to filtering

DTA for scans: 2118291816-26226248  
Precursor ion: 626.30  
Mass type: mono  
Mod's: (M\* +15.99492) C=161.01468

Ion series for charge: +1

| AA | A ions        | B ions        | B* ions | Bo ions | C ions | Y ions         | Y* ions | Yo ions | Z ions |
|----|---------------|---------------|---------|---------|--------|----------------|---------|---------|--------|
| T  | 74.06         | 102.05        |         |         |        |                |         |         |        |
| V  | <b>173.13</b> | <b>201.12</b> |         |         |        | 1150.54        |         |         |        |
| G  | 230.15        | <b>258.14</b> |         |         |        | <b>1051.47</b> |         |         |        |
| S  | 317.18        | <b>345.18</b> |         |         |        | <b>994.45</b>  |         |         |        |
| D  | 432.21        | <b>460.20</b> |         |         |        | <b>907.42</b>  |         |         |        |
| T  | 533.26        | <b>561.25</b> |         |         |        | <b>792.39</b>  |         |         |        |
| F  | 680.32        | <b>708.32</b> |         |         |        | <b>691.34</b>  |         |         |        |
| Y  | 843.39        | <b>871.38</b> |         |         |        | <b>544.28</b>  |         |         |        |
| S  | 930.42        | 958.42        |         |         |        | <b>381.21</b>  |         |         |        |
| F  | 1077.49       | 1105.48       |         |         |        | <b>294.18</b>  |         |         |        |
| K  |               |               |         |         |        | 147.11         |         |         |        |



#2118291816-26226248 NL: 2.31E5



---

| Reference                                                      |                |         |   | P      | Score | Coverage | Accession |     |       |       |  |
|----------------------------------------------------------------|----------------|---------|---|--------|-------|----------|-----------|-----|-------|-------|--|
| Scan(s)                                                        | Sequence       | MH+     | z | P      | XC    | DeltaCn  | Sp        | RSp | Ions  | Count |  |
| IPI:IPI00022420.3 SWISS-PROT:P02753 ENSEMBL:ENSP00000360519;EN |                |         |   | 0.0003 | 10.2  | 0.0      | 0         |     |       |       |  |
| 19287468 - 1                                                   | K.YWGVASFLQK.G | 1198.63 | 2 | 0.0003 | 3.463 | 0.383    | 766.9     | 1   | 18/27 | 2     |  |

1 of 1 peptide matches reported, 0 removed due to filtering

DTA for scans: 19287468-1  
Precursor ion: 599.82  
Mass type: mono  
Mod's: (M\* +15.99492) C=161.01468

Ion series for charge: +1

| AA | A ions        | B ions         | B* ions | Bo ions | C ions | Y ions        | Y* ions | Yo ions | Z ions |
|----|---------------|----------------|---------|---------|--------|---------------|---------|---------|--------|
| Y  | 136.08        | 164.07         |         |         |        |               |         |         |        |
| W  | <b>322.16</b> | <b>350.15</b>  |         |         |        | 1035.56       |         |         |        |
| G  | 379.18        | <b>407.17</b>  |         |         |        | <b>849.48</b> |         |         |        |
| V  | <b>478.24</b> | <b>506.24</b>  |         |         |        | <b>792.46</b> |         |         |        |
| A  | <b>549.28</b> | <b>577.28</b>  |         |         |        | <b>693.39</b> |         |         |        |
| S  | 636.31        | <b>664.31</b>  |         |         |        | <b>622.36</b> |         |         |        |
| F  | 783.38        | <b>811.38</b>  |         |         |        | <b>535.32</b> |         |         |        |
| L  | 896.47        | <b>924.46</b>  |         |         |        | <b>388.26</b> |         |         |        |
| Q  | 1024.53       | <b>1052.52</b> |         |         |        | <b>275.17</b> |         |         |        |
| K  |               |                |         |         |        | 147.11        |         |         |        |

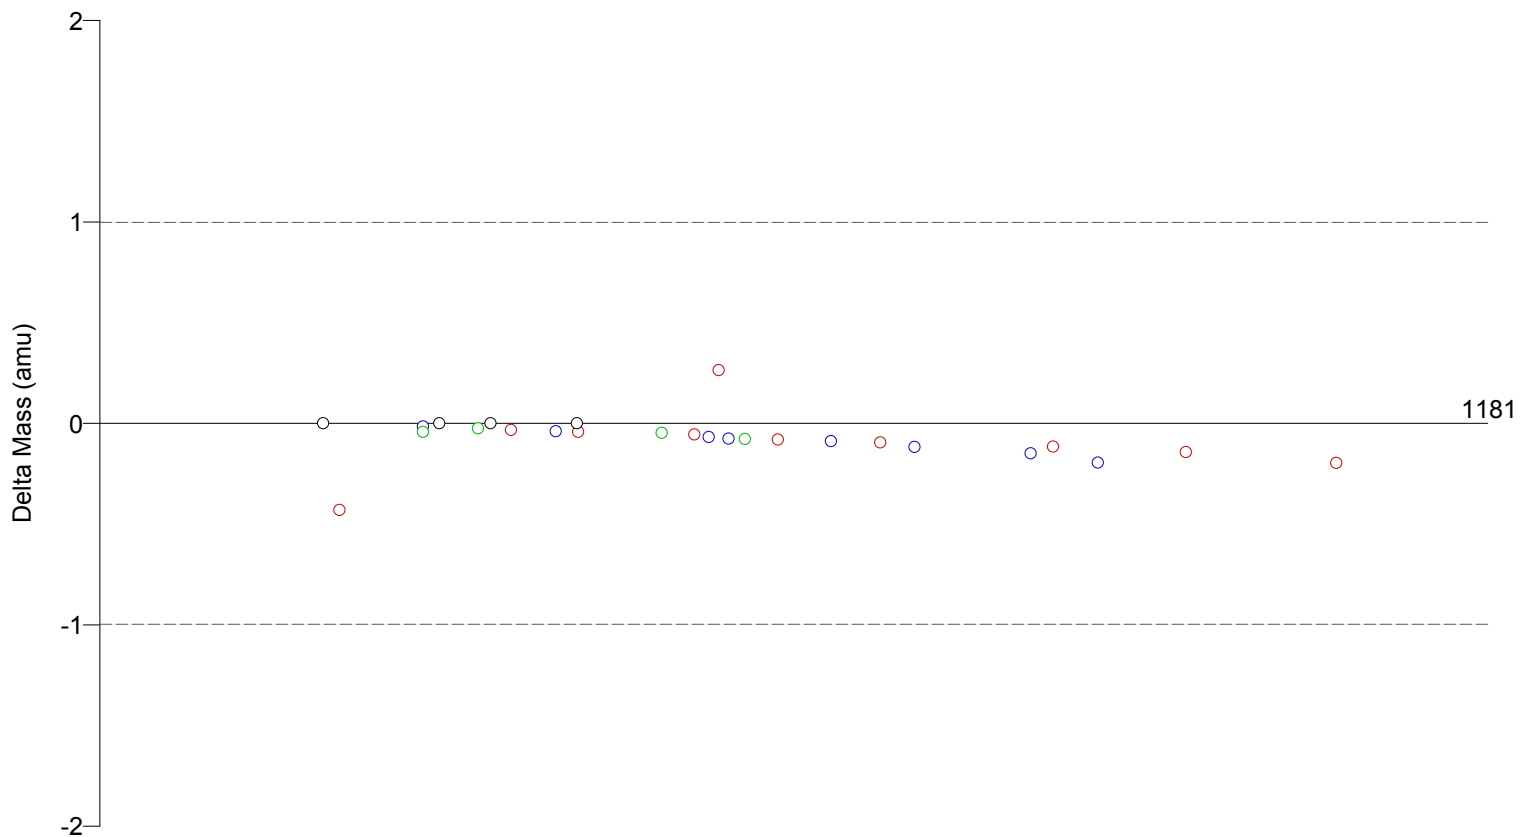

#19287468-1 NL: 2.47E6

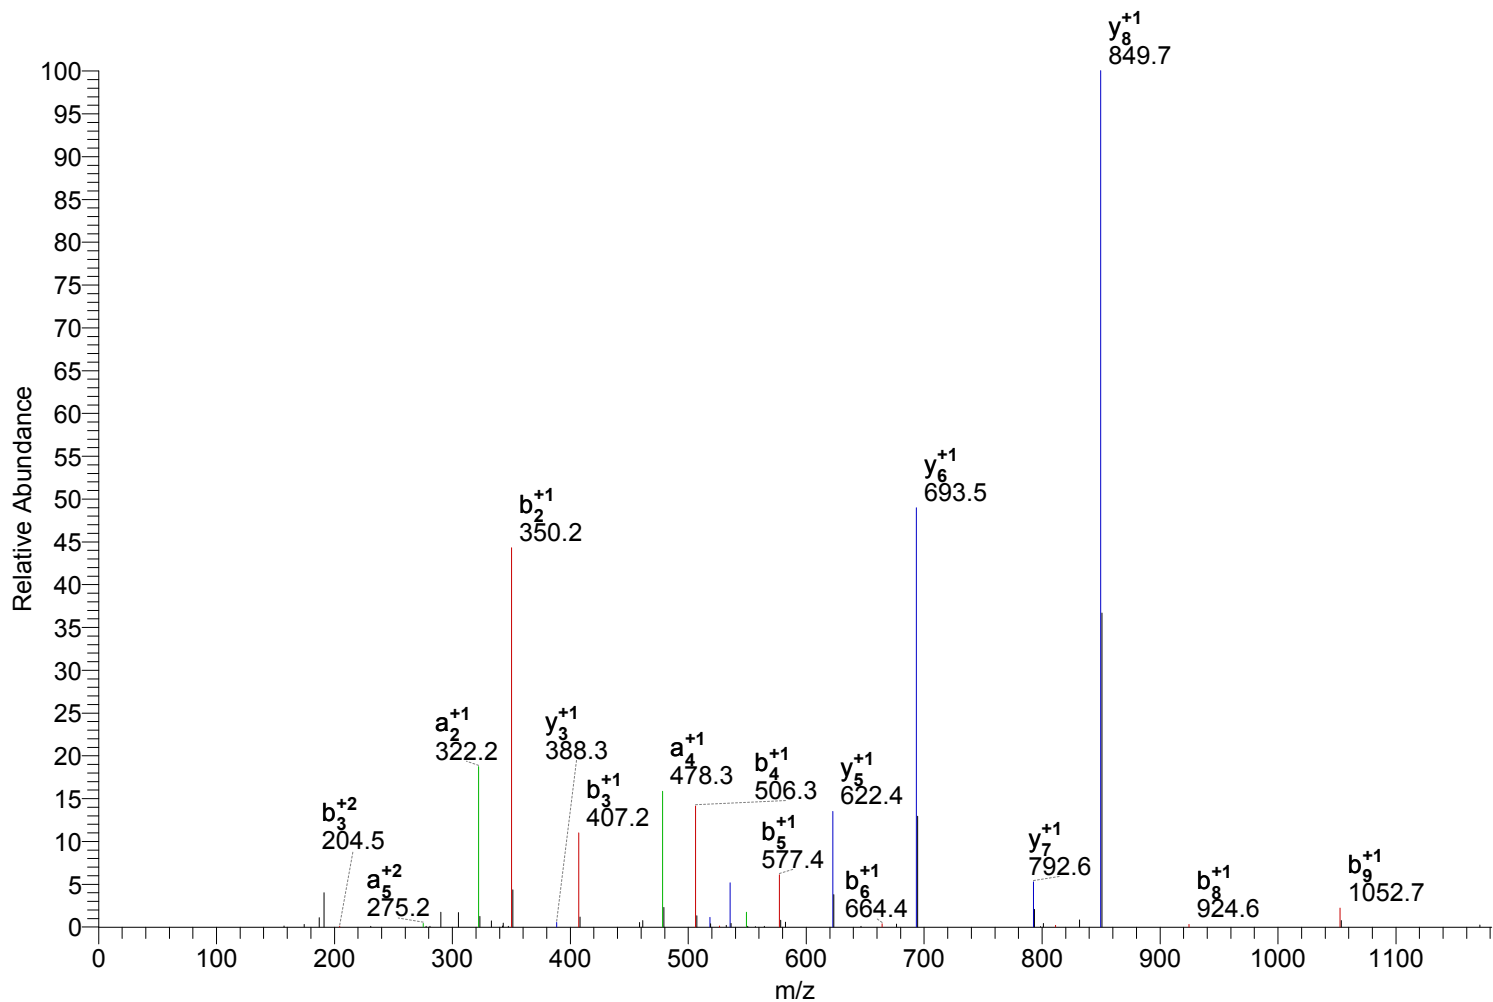



---

| Reference                          |                |         |   | P      | Score | Coverage | Accession |     |       |       |
|------------------------------------|----------------|---------|---|--------|-------|----------|-----------|-----|-------|-------|
| Scan(s)                            | Sequence       | MH+     | z | P      | XC    | DeltaCn  | Sp        | RSp | Ions  | Count |
| IPI:IPI00480192.1 TREMBL:Q5VY30 EN |                |         |   | 0.0003 | 10.2  | 0.0      | 0         |     |       |       |
| 19287468 - 1                       | K.YWGVASFLQK.G | 1198.63 | 2 | 0.0003 | 3.463 | 0.383    | 766.9     | 1   | 18/27 | 2     |

1 of 1 peptide matches reported, 0 removed due to filtering

DTA for scans: 19287468-1  
Precursor ion: 599.82  
Mass type: mono  
Mod's: (M\* +15.99492) C=161.01468

Ion series for charge: +1

| AA | A ions        | B ions         | B* ions | Bo ions | C ions | Y ions        | Y* ions | Yo ions | Z ions |
|----|---------------|----------------|---------|---------|--------|---------------|---------|---------|--------|
| Y  | 136.08        | 164.07         |         |         |        |               |         |         |        |
| W  | <b>322.16</b> | <b>350.15</b>  |         |         |        | 1035.56       |         |         |        |
| G  | 379.18        | <b>407.17</b>  |         |         |        | <b>849.48</b> |         |         |        |
| V  | <b>478.24</b> | <b>506.24</b>  |         |         |        | <b>792.46</b> |         |         |        |
| A  | <b>549.28</b> | <b>577.28</b>  |         |         |        | <b>693.39</b> |         |         |        |
| S  | 636.31        | <b>664.31</b>  |         |         |        | <b>622.36</b> |         |         |        |
| F  | 783.38        | <b>811.38</b>  |         |         |        | <b>535.32</b> |         |         |        |
| L  | 896.47        | <b>924.46</b>  |         |         |        | <b>388.26</b> |         |         |        |
| Q  | 1024.53       | <b>1052.52</b> |         |         |        | <b>275.17</b> |         |         |        |
| K  |               |                |         |         |        | 147.11        |         |         |        |

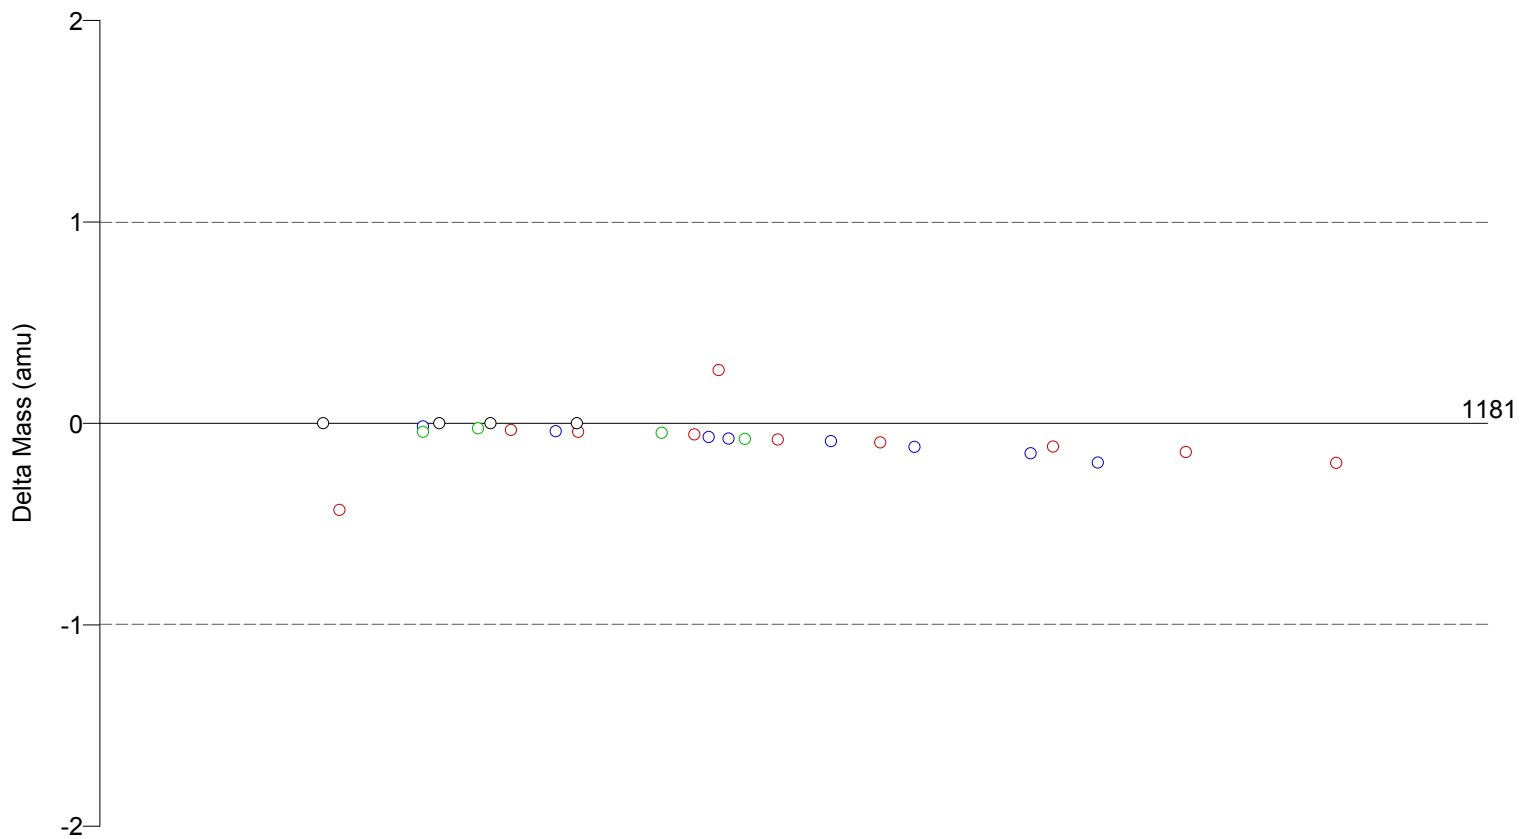

#19287468-1 NL: 2.47E6



---

| Reference                          |                |         |   | P      | Score | Coverage | Accession |     |       |       |
|------------------------------------|----------------|---------|---|--------|-------|----------|-----------|-----|-------|-------|
| Scan(s)                            | Sequence       | MH+     | z | P      | XC    | DeltaCn  | Sp        | RSp | Ions  | Count |
| IPI:IPI00844536.2 TREMBL:A6NCP9 EN |                |         |   | 0.0003 | 10.2  | 0.0      | 0         |     |       |       |
| 19287468 - 1                       | K.YWGVASFLQK.G | 1198.63 | 2 | 0.0003 | 3.463 | 0.383    | 766.9     | 1   | 18/27 | 2     |

1 of 1 peptide matches reported, 0 removed due to filtering

DTA for scans: 19287468-1  
Precursor ion: 599.82  
Mass type: mono  
Mod's: (M\* +15.99492) C=161.01468

Ion series for charge: +1

| AA | A ions        | B ions         | B* ions | Bo ions | C ions | Y ions        | Y* ions | Yo ions | Z ions |
|----|---------------|----------------|---------|---------|--------|---------------|---------|---------|--------|
| Y  | 136.08        | 164.07         |         |         |        |               |         |         |        |
| W  | <b>322.16</b> | <b>350.15</b>  |         |         |        | 1035.56       |         |         |        |
| G  | 379.18        | <b>407.17</b>  |         |         |        | <b>849.48</b> |         |         |        |
| V  | <b>478.24</b> | <b>506.24</b>  |         |         |        | <b>792.46</b> |         |         |        |
| A  | <b>549.28</b> | <b>577.28</b>  |         |         |        | <b>693.39</b> |         |         |        |
| S  | 636.31        | <b>664.31</b>  |         |         |        | <b>622.36</b> |         |         |        |
| F  | 783.38        | <b>811.38</b>  |         |         |        | <b>535.32</b> |         |         |        |
| L  | 896.47        | <b>924.46</b>  |         |         |        | <b>388.26</b> |         |         |        |
| Q  | 1024.53       | <b>1052.52</b> |         |         |        | <b>275.17</b> |         |         |        |
| K  |               |                |         |         |        | 147.11        |         |         |        |



#19287468-1 NL: 2.47E6



| Reference                          |                  |         |   | P      | Score | Coverage | Accession |     |       |       |
|------------------------------------|------------------|---------|---|--------|-------|----------|-----------|-----|-------|-------|
| Scan(s)                            | Sequence         | MH+     | z | P      | XC    | DeltaCn  | Sp        | RSp | Ions  | Count |
| IPI:IPI00426051.3 TREMBL:Q6MZU6 Ta |                  |         |   | 0.0004 | 18.2  | 0.0      | 0         |     |       |       |
| 19287468 - 1                       | K.NSLYLQM*NSLR.A | 1354.68 | 2 | 0.002  | 2.168 | 0.118    | 607.2     | 1   | 14/30 | 30    |
| 19287468 - 1                       | K.GPSVFPLAPCSR.S | 1288.64 | 2 | 0.0004 | 3.377 | 0.600    | 416.0     | 1   | 16/33 | 13    |

2 of 2 peptide matches reported, 0 removed due to filtering

DTA for scans: 19287468-1  
Precursor ion: 677.84  
Mass type: mono  
Mod's: (M\* +15.99492) C=161.01468

Ion series for charge: +1

| AA | A ions         | B ions        | B* ions | Bo ions | C ions | Y ions         | Y* ions | Yo ions | Z ions |
|----|----------------|---------------|---------|---------|--------|----------------|---------|---------|--------|
| N  | 87.06          | 115.05        |         |         |        |                |         |         |        |
| S  | 174.09         | 202.08        |         |         |        | 1240.64        |         |         |        |
| L  | 287.17         | <b>315.17</b> |         |         |        | 1153.60        |         |         |        |
| Y  | 450.23         | <b>478.23</b> |         |         |        | <b>1040.52</b> |         |         |        |
| L  | <b>563.32</b>  | <b>591.31</b> |         |         |        | <b>877.46</b>  |         |         |        |
| Q  | 691.38         | 719.37        |         |         |        | <b>764.37</b>  |         |         |        |
| M* | 838.41         | 866.41        |         |         |        | <b>636.31</b>  |         |         |        |
| N  | 952.46         | <b>980.45</b> |         |         |        | <b>489.28</b>  |         |         |        |
| S  | <b>1039.49</b> | 1067.48       |         |         |        | <b>375.24</b>  |         |         |        |
| L  | 1152.57        | 1180.57       |         |         |        | <b>288.20</b>  |         |         |        |
| R  |                |               |         |         |        | 175.12         |         |         |        |





#19287468-1 NL: 8.93E4



DTA for scans: 19287468-1  
Precursor ion: 644.82  
Mass type: mono  
Mod's: (M\* +15.99492) C=161.01468

Ion series for charge: +1

| AA | A ions        | B ions         | B* ions | Bo ions | C ions | Y ions         | Y* ions | Yo ions | Z ions |
|----|---------------|----------------|---------|---------|--------|----------------|---------|---------|--------|
| G  | 30.03         | 58.03          |         |         |        |                |         |         |        |
| P  | 127.09        | 155.08         |         |         |        | 1231.61        |         |         |        |
| S  | 214.12        | <b>242.11</b>  |         |         |        | <b>1134.56</b> |         |         |        |
| V  | <b>313.19</b> | <b>341.18</b>  |         |         |        | <b>1047.53</b> |         |         |        |
| F  | <b>460.26</b> | <b>488.25</b>  |         |         |        | <b>948.46</b>  |         |         |        |
| P  | 557.31        | <b>585.30</b>  |         |         |        | <b>801.39</b>  |         |         |        |
| L  | 670.39        | <b>698.39</b>  |         |         |        | <b>704.34</b>  |         |         |        |
| A  | 741.43        | <b>769.42</b>  |         |         |        | <b>591.26</b>  |         |         |        |
| P  | 838.48        | 866.48         |         |         |        | <b>520.22</b>  |         |         |        |
| C  | 999.50        | <b>1027.49</b> |         |         |        | 423.17         |         |         |        |
| S  | 1086.53       | 1114.52        |         |         |        | 262.15         |         |         |        |
| R  |               |                |         |         |        | 175.12         |         |         |        |

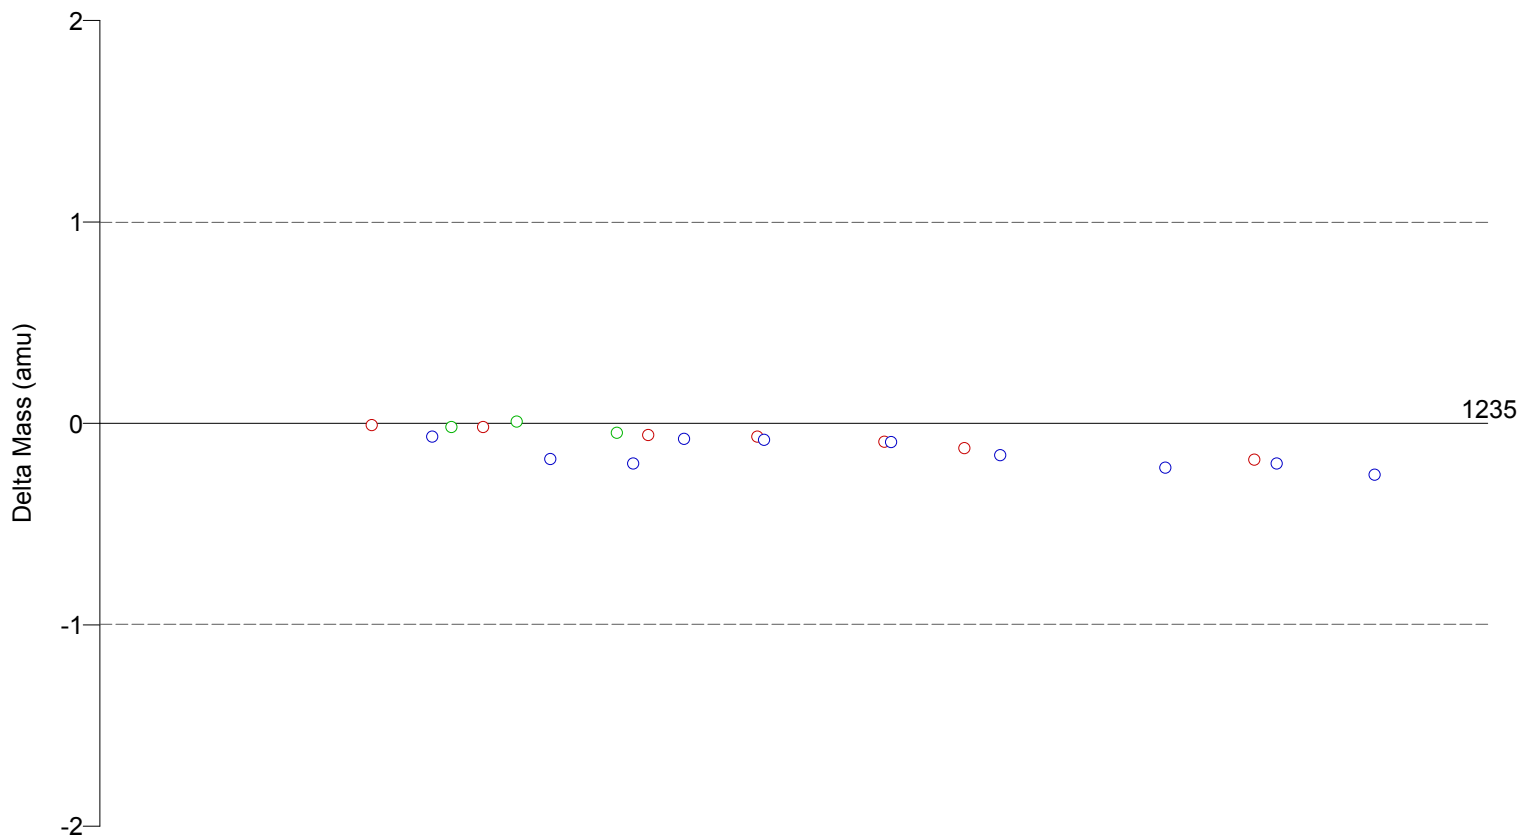

#19287468-1 NL: 4.16E6

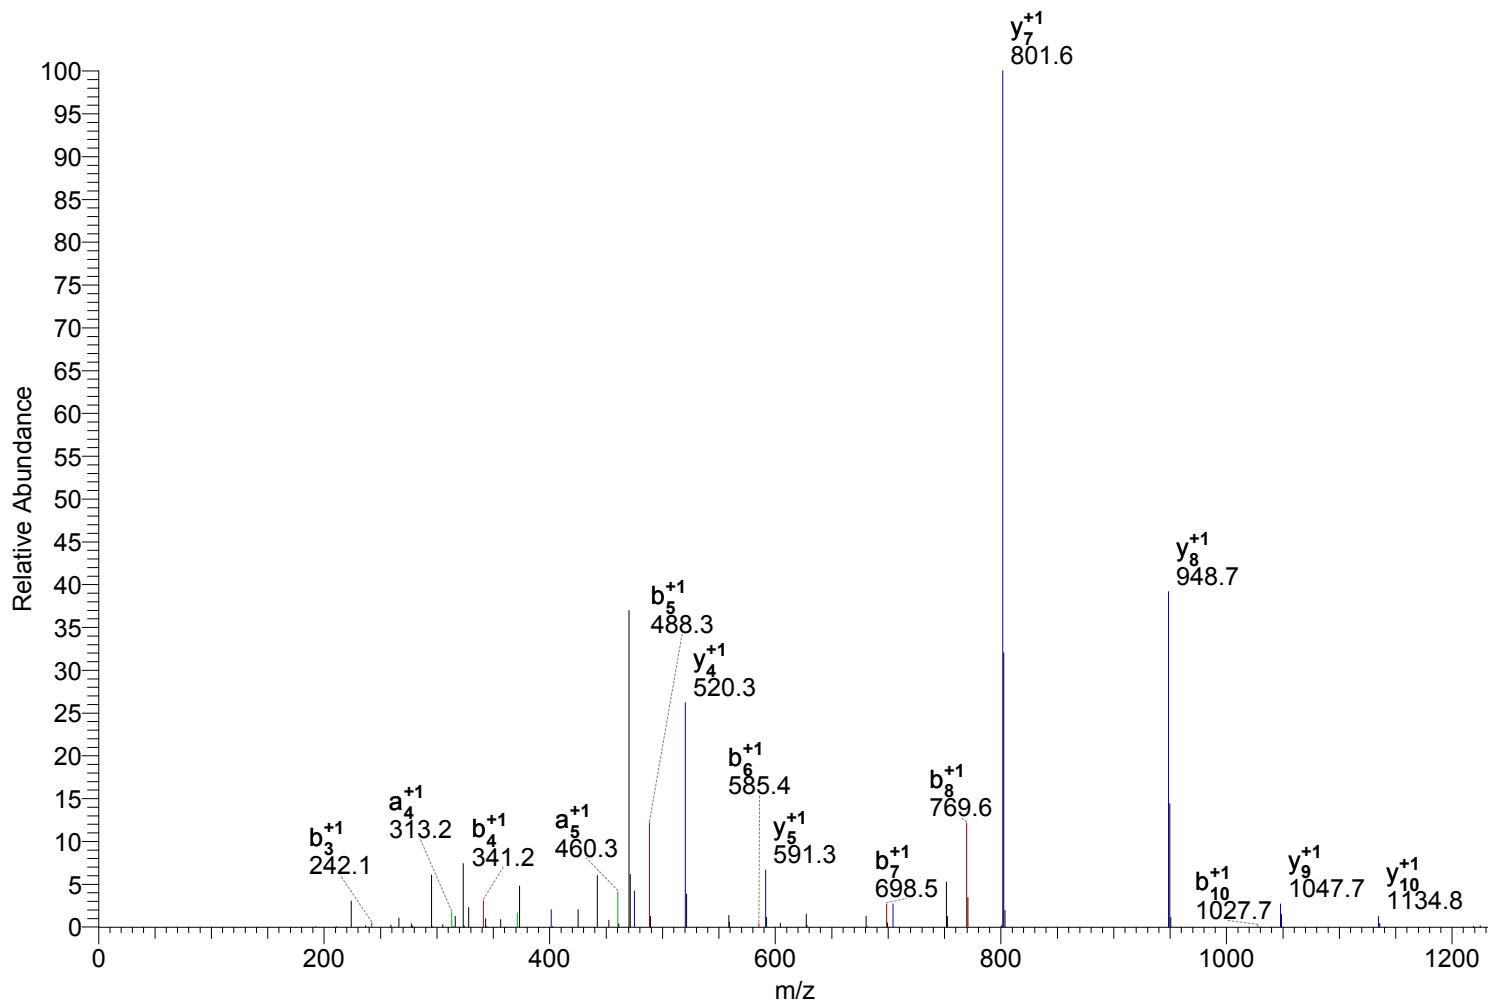

---

| Reference                                                      |                  |         |   | P      | Score | Coverage | Accession |     |       |       |
|----------------------------------------------------------------|------------------|---------|---|--------|-------|----------|-----------|-----|-------|-------|
| Scan(s)                                                        | Sequence         | MH+     | z | P      | XC    | DeltaCn  | Sp        | RSp | Ions  | Count |
| IPI:IPI00168728.1 TREMBL:Q8NF17 ENSEMBL:ENSP00000374992 Tax_Id |                  |         |   | 0.0004 | 10.2  | 0.0      | 0         |     |       |       |
| 19287468 - 1                                                   | K.GPSVFPLAPCSR.S | 1288.64 | 2 | 0.0004 | 3.377 | 0.600    | 416.0     | 1   | 16/33 | 13    |

1 of 1 peptide matches reported, 0 removed due to filtering

DTA for scans: 19287468-1  
Precursor ion: 644.82  
Mass type: mono  
Mod's: (M\* +15.99492) C=161.01468

Ion series for charge: +1

| AA | A ions        | B ions         | B* ions | Bo ions | C ions | Y ions         | Y* ions | Yo ions | Z ions |
|----|---------------|----------------|---------|---------|--------|----------------|---------|---------|--------|
| G  | 30.03         | 58.03          |         |         |        |                |         |         |        |
| P  | 127.09        | 155.08         |         |         |        | 1231.61        |         |         |        |
| S  | 214.12        | <b>242.11</b>  |         |         |        | <b>1134.56</b> |         |         |        |
| V  | <b>313.19</b> | <b>341.18</b>  |         |         |        | <b>1047.53</b> |         |         |        |
| F  | <b>460.26</b> | <b>488.25</b>  |         |         |        | <b>948.46</b>  |         |         |        |
| P  | 557.31        | <b>585.30</b>  |         |         |        | <b>801.39</b>  |         |         |        |
| L  | 670.39        | <b>698.39</b>  |         |         |        | <b>704.34</b>  |         |         |        |
| A  | 741.43        | <b>769.42</b>  |         |         |        | <b>591.26</b>  |         |         |        |
| P  | 838.48        | 866.48         |         |         |        | <b>520.22</b>  |         |         |        |
| C  | 999.50        | <b>1027.49</b> |         |         |        | 423.17         |         |         |        |
| S  | 1086.53       | 1114.52        |         |         |        | 262.15         |         |         |        |
| R  |               |                |         |         |        | 175.12         |         |         |        |



#19287468-1 NL: 4.16E6



---

| Reference                          |                  |         |   | P      | Score | Coverage | Accession |     |       |       |
|------------------------------------|------------------|---------|---|--------|-------|----------|-----------|-----|-------|-------|
| Scan(s)                            | Sequence         | MH+     | z | P      | XC    | DeltaCn  | Sp        | RSp | Ions  | Count |
| IPI:IPI00383957.1 TREMBL:O95978 Ta |                  |         |   | 0.0004 | 10.2  | 0.0      | 0         |     |       |       |
| 19287468 - 1                       | K.GPSVFPLAPCSR.S | 1288.64 | 2 | 0.0004 | 3.377 | 0.600    | 416.0     | 1   | 16/33 | 13    |

1 of 1 peptide matches reported, 0 removed due to filtering

DTA for scans: 19287468-1  
Precursor ion: 644.82  
Mass type: mono  
Mod's: (M\* +15.99492) C=161.01468

Ion series for charge: +1

| AA | A ions        | B ions         | B* ions | Bo ions | C ions | Y ions         | Y* ions | Yo ions | Z ions |
|----|---------------|----------------|---------|---------|--------|----------------|---------|---------|--------|
| G  | 30.03         | 58.03          |         |         |        |                |         |         |        |
| P  | 127.09        | 155.08         |         |         |        | 1231.61        |         |         |        |
| S  | 214.12        | <b>242.11</b>  |         |         |        | <b>1134.56</b> |         |         |        |
| V  | <b>313.19</b> | <b>341.18</b>  |         |         |        | <b>1047.53</b> |         |         |        |
| F  | <b>460.26</b> | <b>488.25</b>  |         |         |        | <b>948.46</b>  |         |         |        |
| P  | 557.31        | <b>585.30</b>  |         |         |        | <b>801.39</b>  |         |         |        |
| L  | 670.39        | <b>698.39</b>  |         |         |        | <b>704.34</b>  |         |         |        |
| A  | 741.43        | <b>769.42</b>  |         |         |        | <b>591.26</b>  |         |         |        |
| P  | 838.48        | 866.48         |         |         |        | <b>520.22</b>  |         |         |        |
| C  | 999.50        | <b>1027.49</b> |         |         |        | 423.17         |         |         |        |
| S  | 1086.53       | 1114.52        |         |         |        | 262.15         |         |         |        |
| R  |               |                |         |         |        | 175.12         |         |         |        |





#19287468-1 NL: 4.16E6



---

| Reference                          |                  |         |   | P      | Score | Coverage | Accession |     |       |       |
|------------------------------------|------------------|---------|---|--------|-------|----------|-----------|-----|-------|-------|
| Scan(s)                            | Sequence         | MH+     | z | P      | XC    | DeltaCn  | Sp        | RSp | Ions  | Count |
| IPI:IPI00399007.7 SWISS-PROT:P0185 |                  |         |   | 0.0004 | 10.2  | 0.0      | 0         |     |       |       |
| 19287468 - 1                       | K.GPSVFPLAPCSR.S | 1288.64 | 2 | 0.0004 | 3.377 | 0.600    | 416.0     | 1   | 16/33 | 13    |

1 of 1 peptide matches reported, 0 removed due to filtering

DTA for scans: 19287468-1  
Precursor ion: 644.82  
Mass type: mono  
Mod's: (M\* +15.99492) C=161.01468

Ion series for charge: +1

| AA | A ions        | B ions         | B* ions | Bo ions | C ions | Y ions         | Y* ions | Yo ions | Z ions |
|----|---------------|----------------|---------|---------|--------|----------------|---------|---------|--------|
| G  | 30.03         | 58.03          |         |         |        |                |         |         |        |
| P  | 127.09        | 155.08         |         |         |        | 1231.61        |         |         |        |
| S  | 214.12        | <b>242.11</b>  |         |         |        | <b>1134.56</b> |         |         |        |
| V  | <b>313.19</b> | <b>341.18</b>  |         |         |        | <b>1047.53</b> |         |         |        |
| F  | <b>460.26</b> | <b>488.25</b>  |         |         |        | <b>948.46</b>  |         |         |        |
| P  | 557.31        | <b>585.30</b>  |         |         |        | <b>801.39</b>  |         |         |        |
| L  | 670.39        | <b>698.39</b>  |         |         |        | <b>704.34</b>  |         |         |        |
| A  | 741.43        | <b>769.42</b>  |         |         |        | <b>591.26</b>  |         |         |        |
| P  | 838.48        | 866.48         |         |         |        | <b>520.22</b>  |         |         |        |
| C  | 999.50        | <b>1027.49</b> |         |         |        | 423.17         |         |         |        |
| S  | 1086.53       | 1114.52        |         |         |        | 262.15         |         |         |        |
| R  |               |                |         |         |        | 175.12         |         |         |        |



#19287468-1 NL: 4.16E6



---

| Reference                          |                  |         |   | P      | Score | Coverage | Accession |     |       |       |
|------------------------------------|------------------|---------|---|--------|-------|----------|-----------|-----|-------|-------|
| Scan(s)                            | Sequence         | MH+     | z | P      | XC    | DeltaCn  | Sp        | RSp | Ions  | Count |
| IPI:IPI00418153.1 TREMBL:Q6N030 Ta |                  |         |   | 0.0004 | 10.2  | 0.0      | 0         |     |       |       |
| 19287468 - 1                       | K.GPSVFPLAPCSR.S | 1288.64 | 2 | 0.0004 | 3.377 | 0.600    | 416.0     | 1   | 16/33 | 13    |

1 of 1 peptide matches reported, 0 removed due to filtering

DTA for scans: 19287468-1  
Precursor ion: 644.82  
Mass type: mono  
Mod's: (M\* +15.99492) C=161.01468

Ion series for charge: +1

| AA | A ions        | B ions         | B* ions | Bo ions | C ions | Y ions         | Y* ions | Yo ions | Z ions |
|----|---------------|----------------|---------|---------|--------|----------------|---------|---------|--------|
| G  | 30.03         | 58.03          |         |         |        |                |         |         |        |
| P  | 127.09        | 155.08         |         |         |        | 1231.61        |         |         |        |
| S  | 214.12        | <b>242.11</b>  |         |         |        | <b>1134.56</b> |         |         |        |
| V  | <b>313.19</b> | <b>341.18</b>  |         |         |        | <b>1047.53</b> |         |         |        |
| F  | <b>460.26</b> | <b>488.25</b>  |         |         |        | <b>948.46</b>  |         |         |        |
| P  | 557.31        | <b>585.30</b>  |         |         |        | <b>801.39</b>  |         |         |        |
| L  | 670.39        | <b>698.39</b>  |         |         |        | <b>704.34</b>  |         |         |        |
| A  | 741.43        | <b>769.42</b>  |         |         |        | <b>591.26</b>  |         |         |        |
| P  | 838.48        | 866.48         |         |         |        | <b>520.22</b>  |         |         |        |
| C  | 999.50        | <b>1027.49</b> |         |         |        | 423.17         |         |         |        |
| S  | 1086.53       | 1114.52        |         |         |        | 262.15         |         |         |        |
| R  |               |                |         |         |        | 175.12         |         |         |        |



#19287468-1 NL: 4.16E6



---

| Reference                          |                  |         |   | P      | Score | Coverage | Accession |     |       |       |
|------------------------------------|------------------|---------|---|--------|-------|----------|-----------|-----|-------|-------|
| Scan(s)                            | Sequence         | MH+     | z | P      | XC    | DeltaCn  | Sp        | RSp | Ions  | Count |
| IPI:IPI00827754.3 SWISS-PROT:P0186 |                  |         |   | 0.0004 | 10.2  | 0.0      | 0         |     |       |       |
| 19287468 - 1                       | K.GPSVFPLAPCSR.S | 1288.64 | 2 | 0.0004 | 3.377 | 0.600    | 416.0     | 1   | 16/33 | 13    |

1 of 1 peptide matches reported, 0 removed due to filtering



DTA for scans: 19287468-1  
Precursor ion: 644.82  
Mass type: mono  
Mod's: (M\* +15.99492) C=161.01468

Ion series for charge: +1

| AA | A ions        | B ions         | B* ions | Bo ions | C ions | Y ions         | Y* ions | Yo ions | Z ions |
|----|---------------|----------------|---------|---------|--------|----------------|---------|---------|--------|
| G  | 30.03         | 58.03          |         |         |        |                |         |         |        |
| P  | 127.09        | 155.08         |         |         |        | 1231.61        |         |         |        |
| S  | 214.12        | <b>242.11</b>  |         |         |        | <b>1134.56</b> |         |         |        |
| V  | <b>313.19</b> | <b>341.18</b>  |         |         |        | <b>1047.53</b> |         |         |        |
| F  | <b>460.26</b> | <b>488.25</b>  |         |         |        | <b>948.46</b>  |         |         |        |
| P  | 557.31        | <b>585.30</b>  |         |         |        | <b>801.39</b>  |         |         |        |
| L  | 670.39        | <b>698.39</b>  |         |         |        | <b>704.34</b>  |         |         |        |
| A  | 741.43        | <b>769.42</b>  |         |         |        | <b>591.26</b>  |         |         |        |
| P  | 838.48        | 866.48         |         |         |        | <b>520.22</b>  |         |         |        |
| C  | 999.50        | <b>1027.49</b> |         |         |        | 423.17         |         |         |        |
| S  | 1086.53       | 1114.52        |         |         |        | 262.15         |         |         |        |
| R  |               |                |         |         |        | 175.12         |         |         |        |



#19287468-1 NL: 4.16E6



---

| Reference                          |                  |         |   | P      | Score | Coverage | Accession |     |       |       |
|------------------------------------|------------------|---------|---|--------|-------|----------|-----------|-----|-------|-------|
| Scan(s)                            | Sequence         | MH+     | z | P      | XC    | DeltaCn  | Sp        | RSp | Ions  | Count |
| IPI:IPI00829716.2 TREMBL:A6NJI8 EN |                  |         |   | 0.0004 | 10.2  | 0.0      | 0         |     |       |       |
| 19287468 - 1                       | K.GPSVFPLAPCSR.S | 1288.64 | 2 | 0.0004 | 3.377 | 0.600    | 416.0     | 1   | 16/33 | 13    |

1 of 1 peptide matches reported, 0 removed due to filtering

DTA for scans: 19287468-1  
Precursor ion: 644.82  
Mass type: mono  
Mod's: (M\* +15.99492) C=161.01468

Ion series for charge: +1

| AA | A ions        | B ions         | B* ions | Bo ions | C ions | Y ions         | Y* ions | Yo ions | Z ions |
|----|---------------|----------------|---------|---------|--------|----------------|---------|---------|--------|
| G  | 30.03         | 58.03          |         |         |        |                |         |         |        |
| P  | 127.09        | 155.08         |         |         |        | 1231.61        |         |         |        |
| S  | 214.12        | <b>242.11</b>  |         |         |        | <b>1134.56</b> |         |         |        |
| V  | <b>313.19</b> | <b>341.18</b>  |         |         |        | <b>1047.53</b> |         |         |        |
| F  | <b>460.26</b> | <b>488.25</b>  |         |         |        | <b>948.46</b>  |         |         |        |
| P  | 557.31        | <b>585.30</b>  |         |         |        | <b>801.39</b>  |         |         |        |
| L  | 670.39        | <b>698.39</b>  |         |         |        | <b>704.34</b>  |         |         |        |
| A  | 741.43        | <b>769.42</b>  |         |         |        | <b>591.26</b>  |         |         |        |
| P  | 838.48        | 866.48         |         |         |        | <b>520.22</b>  |         |         |        |
| C  | 999.50        | <b>1027.49</b> |         |         |        | 423.17         |         |         |        |
| S  | 1086.53       | 1114.52        |         |         |        | 262.15         |         |         |        |
| R  |               |                |         |         |        | 175.12         |         |         |        |



#19287468-1 NL: 4.16E6



---

| Reference                          |                  |         |   | P      | Score | Coverage | Accession |     |       |       |
|------------------------------------|------------------|---------|---|--------|-------|----------|-----------|-----|-------|-------|
| Scan(s)                            | Sequence         | MH+     | z | P      | XC    | DeltaCn  | Sp        | RSp | Ions  | Count |
| IPI:IPI00829814.1 SWISS-PROT:P0186 |                  |         |   | 0.0004 | 10.2  | 0.0      | 0         |     |       |       |
| 19287468 - 1                       | K.GPSVFPLAPCSR.S | 1288.64 | 2 | 0.0004 | 3.377 | 0.600    | 416.0     | 1   | 16/33 | 13    |

1 of 1 peptide matches reported, 0 removed due to filtering

DTA for scans: 19287468-1  
Precursor ion: 644.82  
Mass type: mono  
Mod's: (M\* +15.99492) C=161.01468

Ion series for charge: +1

| AA | A ions        | B ions         | B* ions | Bo ions | C ions | Y ions         | Y* ions | Yo ions | Z ions |
|----|---------------|----------------|---------|---------|--------|----------------|---------|---------|--------|
| G  | 30.03         | 58.03          |         |         |        |                |         |         |        |
| P  | 127.09        | 155.08         |         |         |        | 1231.61        |         |         |        |
| S  | 214.12        | <b>242.11</b>  |         |         |        | <b>1134.56</b> |         |         |        |
| V  | <b>313.19</b> | <b>341.18</b>  |         |         |        | <b>1047.53</b> |         |         |        |
| F  | <b>460.26</b> | <b>488.25</b>  |         |         |        | <b>948.46</b>  |         |         |        |
| P  | 557.31        | <b>585.30</b>  |         |         |        | <b>801.39</b>  |         |         |        |
| L  | 670.39        | <b>698.39</b>  |         |         |        | <b>704.34</b>  |         |         |        |
| A  | 741.43        | <b>769.42</b>  |         |         |        | <b>591.26</b>  |         |         |        |
| P  | 838.48        | 866.48         |         |         |        | <b>520.22</b>  |         |         |        |
| C  | 999.50        | <b>1027.49</b> |         |         |        | 423.17         |         |         |        |
| S  | 1086.53       | 1114.52        |         |         |        | 262.15         |         |         |        |
| R  |               |                |         |         |        | 175.12         |         |         |        |



#19287468-1 NL: 4.16E6





---

| Reference                          |                  |         |   | P      | Score | Coverage | Accession |     |       |       |
|------------------------------------|------------------|---------|---|--------|-------|----------|-----------|-----|-------|-------|
| Scan(s)                            | Sequence         | MH+     | z | P      | XC    | DeltaCn  | Sp        | RSp | Ions  | Count |
| IPI:IPI00829940.1 TREMBL:A6NGU3 EN |                  |         |   | 0.0004 | 10.2  | 0.0      | 0         |     |       |       |
| 19287468 - 1                       | K.GPSVFPLAPCSR.S | 1288.64 | 2 | 0.0004 | 3.377 | 0.600    | 416.0     | 1   | 16/33 | 13    |

1 of 1 peptide matches reported, 0 removed due to filtering

DTA for scans: 19287468-1  
Precursor ion: 644.82  
Mass type: mono  
Mod's: (M\* +15.99492) C=161.01468

Ion series for charge: +1

| AA | A ions        | B ions         | B* ions | Bo ions | C ions | Y ions         | Y* ions | Yo ions | Z ions |
|----|---------------|----------------|---------|---------|--------|----------------|---------|---------|--------|
| G  | 30.03         | 58.03          |         |         |        |                |         |         |        |
| P  | 127.09        | 155.08         |         |         |        | 1231.61        |         |         |        |
| S  | 214.12        | <b>242.11</b>  |         |         |        | <b>1134.56</b> |         |         |        |
| V  | <b>313.19</b> | <b>341.18</b>  |         |         |        | <b>1047.53</b> |         |         |        |
| F  | <b>460.26</b> | <b>488.25</b>  |         |         |        | <b>948.46</b>  |         |         |        |
| P  | 557.31        | <b>585.30</b>  |         |         |        | <b>801.39</b>  |         |         |        |
| L  | 670.39        | <b>698.39</b>  |         |         |        | <b>704.34</b>  |         |         |        |
| A  | 741.43        | <b>769.42</b>  |         |         |        | <b>591.26</b>  |         |         |        |
| P  | 838.48        | 866.48         |         |         |        | <b>520.22</b>  |         |         |        |
| C  | 999.50        | <b>1027.49</b> |         |         |        | 423.17         |         |         |        |
| S  | 1086.53       | 1114.52        |         |         |        | 262.15         |         |         |        |
| R  |               |                |         |         |        | 175.12         |         |         |        |



#19287468-1 NL: 4.16E6



---

| Reference                          |                  |         |   | P      | Score | Coverage | Accession |     |       |       |
|------------------------------------|------------------|---------|---|--------|-------|----------|-----------|-----|-------|-------|
| Scan(s)                            | Sequence         | MH+     | z | P      | XC    | DeltaCn  | Sp        | RSp | Ions  | Count |
| IPI:IPI00830132.1 TREMBL:A6NNZ4 EN |                  |         |   | 0.0004 | 10.2  | 0.0      | 0         |     |       |       |
| 19287468 - 1                       | K.GPSVFPLAPCSR.S | 1288.64 | 2 | 0.0004 | 3.377 | 0.600    | 416.0     | 1   | 16/33 | 13    |

1 of 1 peptide matches reported, 0 removed due to filtering

DTA for scans: 19287468-1  
Precursor ion: 644.82  
Mass type: mono  
Mod's: (M\* +15.99492) C=161.01468

Ion series for charge: +1

| AA | A ions        | B ions         | B* ions | Bo ions | C ions | Y ions         | Y* ions | Yo ions | Z ions |
|----|---------------|----------------|---------|---------|--------|----------------|---------|---------|--------|
| G  | 30.03         | 58.03          |         |         |        |                |         |         |        |
| P  | 127.09        | 155.08         |         |         |        | 1231.61        |         |         |        |
| S  | 214.12        | <b>242.11</b>  |         |         |        | <b>1134.56</b> |         |         |        |
| V  | <b>313.19</b> | <b>341.18</b>  |         |         |        | <b>1047.53</b> |         |         |        |
| F  | <b>460.26</b> | <b>488.25</b>  |         |         |        | <b>948.46</b>  |         |         |        |
| P  | 557.31        | <b>585.30</b>  |         |         |        | <b>801.39</b>  |         |         |        |
| L  | 670.39        | <b>698.39</b>  |         |         |        | <b>704.34</b>  |         |         |        |
| A  | 741.43        | <b>769.42</b>  |         |         |        | <b>591.26</b>  |         |         |        |
| P  | 838.48        | 866.48         |         |         |        | <b>520.22</b>  |         |         |        |
| C  | 999.50        | <b>1027.49</b> |         |         |        | 423.17         |         |         |        |
| S  | 1086.53       | 1114.52        |         |         |        | 262.15         |         |         |        |
| R  |               |                |         |         |        | 175.12         |         |         |        |

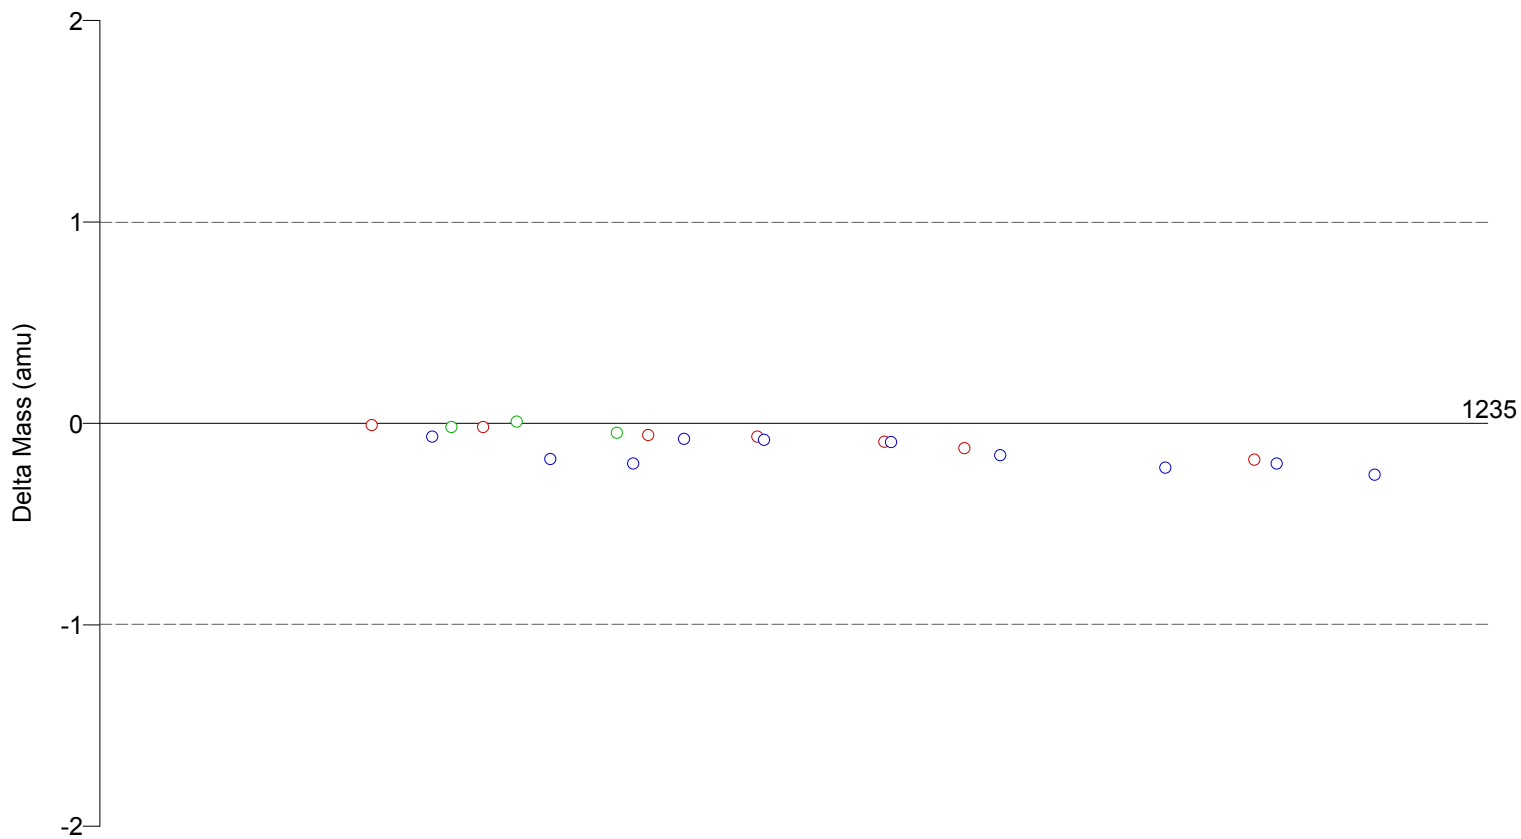

#19287468-1 NL: 4.16E6



---

| Reference                          |                  |         |   | P      | Score | Coverage | Accession |     |       |       |
|------------------------------------|------------------|---------|---|--------|-------|----------|-----------|-----|-------|-------|
| Scan(s)                            | Sequence         | MH+     | z | P      | XC    | DeltaCn  | Sp        | RSp | Ions  | Count |
| IPI:IPI00930072.1 TREMBL:Q68CN4 Ta |                  |         |   | 0.0004 | 10.2  | 0.0      | 0         |     |       |       |
| 19287468 - 1                       | K.GPSVFPLAPCSR.S | 1288.64 | 2 | 0.0004 | 3.377 | 0.600    | 416.0     | 1   | 16/33 | 13    |

1 of 1 peptide matches reported, 0 removed due to filtering

DTA for scans: 19287468-1  
Precursor ion: 644.82  
Mass type: mono  
Mod's: (M\* +15.99492) C=161.01468

Ion series for charge: +1

| AA | A ions        | B ions         | B* ions | Bo ions | C ions | Y ions         | Y* ions | Yo ions | Z ions |
|----|---------------|----------------|---------|---------|--------|----------------|---------|---------|--------|
| G  | 30.03         | 58.03          |         |         |        |                |         |         |        |
| P  | 127.09        | 155.08         |         |         |        | 1231.61        |         |         |        |
| S  | 214.12        | <b>242.11</b>  |         |         |        | <b>1134.56</b> |         |         |        |
| V  | <b>313.19</b> | <b>341.18</b>  |         |         |        | <b>1047.53</b> |         |         |        |
| F  | <b>460.26</b> | <b>488.25</b>  |         |         |        | <b>948.46</b>  |         |         |        |
| P  | 557.31        | <b>585.30</b>  |         |         |        | <b>801.39</b>  |         |         |        |
| L  | 670.39        | <b>698.39</b>  |         |         |        | <b>704.34</b>  |         |         |        |
| A  | 741.43        | <b>769.42</b>  |         |         |        | <b>591.26</b>  |         |         |        |
| P  | 838.48        | 866.48         |         |         |        | <b>520.22</b>  |         |         |        |
| C  | 999.50        | <b>1027.49</b> |         |         |        | 423.17         |         |         |        |
| S  | 1086.53       | 1114.52        |         |         |        | 262.15         |         |         |        |
| R  |               |                |         |         |        | 175.12         |         |         |        |





#19287468-1 NL: 4.16E6



---

| Reference                          |                  |         |   | P      | Score | Coverage | Accession |     |       |       |
|------------------------------------|------------------|---------|---|--------|-------|----------|-----------|-----|-------|-------|
| Scan(s)                            | Sequence         | MH+     | z | P      | XC    | DeltaCn  | Sp        | RSp | Ions  | Count |
| IPI:IPI00930442.1 TREMBL:Q6MZX7 Ta |                  |         |   | 0.0004 | 10.2  | 0.0      | 0         |     |       |       |
| 19287468 - 1                       | K.GPSVFPLAPCSR.S | 1288.64 | 2 | 0.0004 | 3.377 | 0.600    | 416.0     | 1   | 16/33 | 13    |

1 of 1 peptide matches reported, 0 removed due to filtering

DTA for scans: 19287468-1  
Precursor ion: 644.82  
Mass type: mono  
Mod's: (M\* +15.99492) C=161.01468

Ion series for charge: +1

| AA | A ions        | B ions         | B* ions | Bo ions | C ions | Y ions         | Y* ions | Yo ions | Z ions |
|----|---------------|----------------|---------|---------|--------|----------------|---------|---------|--------|
| G  | 30.03         | 58.03          |         |         |        |                |         |         |        |
| P  | 127.09        | 155.08         |         |         |        | 1231.61        |         |         |        |
| S  | 214.12        | <b>242.11</b>  |         |         |        | <b>1134.56</b> |         |         |        |
| V  | <b>313.19</b> | <b>341.18</b>  |         |         |        | <b>1047.53</b> |         |         |        |
| F  | <b>460.26</b> | <b>488.25</b>  |         |         |        | <b>948.46</b>  |         |         |        |
| P  | 557.31        | <b>585.30</b>  |         |         |        | <b>801.39</b>  |         |         |        |
| L  | 670.39        | <b>698.39</b>  |         |         |        | <b>704.34</b>  |         |         |        |
| A  | 741.43        | <b>769.42</b>  |         |         |        | <b>591.26</b>  |         |         |        |
| P  | 838.48        | 866.48         |         |         |        | <b>520.22</b>  |         |         |        |
| C  | 999.50        | <b>1027.49</b> |         |         |        | 423.17         |         |         |        |
| S  | 1086.53       | 1114.52        |         |         |        | 262.15         |         |         |        |
| R  |               |                |         |         |        | 175.12         |         |         |        |



#19287468-1 NL: 4.16E6



---

| Reference                          |                  |         |   | P      | Score | Coverage | Accession |     |       |       |
|------------------------------------|------------------|---------|---|--------|-------|----------|-----------|-----|-------|-------|
| Scan(s)                            | Sequence         | MH+     | z | P      | XC    | DeltaCn  | Sp        | RSp | Ions  | Count |
| IPI:IPI00930684.1 TREMBL:Q5EBM2 Ta |                  |         |   | 0.0004 | 10.2  | 0.0      | 0         |     |       |       |
| 19287468 - 1                       | K.GPSVFPLAPCSR.S | 1288.64 | 2 | 0.0004 | 3.377 | 0.600    | 416.0     | 1   | 16/33 | 13    |

1 of 1 peptide matches reported, 0 removed due to filtering

DTA for scans: 19287468-1  
Precursor ion: 644.82  
Mass type: mono  
Mod's: (M\* +15.99492) C=161.01468

Ion series for charge: +1

| AA | A ions        | B ions         | B* ions | Bo ions | C ions | Y ions         | Y* ions | Yo ions | Z ions |
|----|---------------|----------------|---------|---------|--------|----------------|---------|---------|--------|
| G  | 30.03         | 58.03          |         |         |        |                |         |         |        |
| P  | 127.09        | 155.08         |         |         |        | 1231.61        |         |         |        |
| S  | 214.12        | <b>242.11</b>  |         |         |        | <b>1134.56</b> |         |         |        |
| V  | <b>313.19</b> | <b>341.18</b>  |         |         |        | <b>1047.53</b> |         |         |        |
| F  | <b>460.26</b> | <b>488.25</b>  |         |         |        | <b>948.46</b>  |         |         |        |
| P  | 557.31        | <b>585.30</b>  |         |         |        | <b>801.39</b>  |         |         |        |
| L  | 670.39        | <b>698.39</b>  |         |         |        | <b>704.34</b>  |         |         |        |
| A  | 741.43        | <b>769.42</b>  |         |         |        | <b>591.26</b>  |         |         |        |
| P  | 838.48        | 866.48         |         |         |        | <b>520.22</b>  |         |         |        |
| C  | 999.50        | <b>1027.49</b> |         |         |        | 423.17         |         |         |        |
| S  | 1086.53       | 1114.52        |         |         |        | 262.15         |         |         |        |
| R  |               |                |         |         |        | 175.12         |         |         |        |



#19287468-1 NL: 4.16E6



---

| Reference                          |                  |         |   | P      | Score | Coverage | Accession |     |       |       |
|------------------------------------|------------------|---------|---|--------|-------|----------|-----------|-----|-------|-------|
| Scan(s)                            | Sequence         | MH+     | z | P      | XC    | DeltaCn  | Sp        | RSp | Ions  | Count |
| IPI:IPI00936490.1 REFSEQ:XP_002348 |                  |         |   | 0.0004 | 10.2  | 0.0      | 0         |     |       |       |
| 19287468 - 1                       | K.GPSVFPLAPCSR.S | 1288.64 | 2 | 0.0004 | 3.377 | 0.600    | 416.0     | 1   | 16/33 | 13    |

1 of 1 peptide matches reported, 0 removed due to filtering



DTA for scans: 19287468-1  
Precursor ion: 644.82  
Mass type: mono  
Mod's: (M\* +15.99492) C=161.01468

Ion series for charge: +1

| AA | A ions        | B ions         | B* ions | Bo ions | C ions | Y ions         | Y* ions | Yo ions | Z ions |
|----|---------------|----------------|---------|---------|--------|----------------|---------|---------|--------|
| G  | 30.03         | 58.03          |         |         |        |                |         |         |        |
| P  | 127.09        | 155.08         |         |         |        | 1231.61        |         |         |        |
| S  | 214.12        | <b>242.11</b>  |         |         |        | <b>1134.56</b> |         |         |        |
| V  | <b>313.19</b> | <b>341.18</b>  |         |         |        | <b>1047.53</b> |         |         |        |
| F  | <b>460.26</b> | <b>488.25</b>  |         |         |        | <b>948.46</b>  |         |         |        |
| P  | 557.31        | <b>585.30</b>  |         |         |        | <b>801.39</b>  |         |         |        |
| L  | 670.39        | <b>698.39</b>  |         |         |        | <b>704.34</b>  |         |         |        |
| A  | 741.43        | <b>769.42</b>  |         |         |        | <b>591.26</b>  |         |         |        |
| P  | 838.48        | 866.48         |         |         |        | <b>520.22</b>  |         |         |        |
| C  | 999.50        | <b>1027.49</b> |         |         |        | 423.17         |         |         |        |
| S  | 1086.53       | 1114.52        |         |         |        | 262.15         |         |         |        |
| R  |               |                |         |         |        | 175.12         |         |         |        |



#19287468-1 NL: 4.16E6



| Reference                                                      |                     |         |   | P      | Score | Coverage | Accession |     |       |       |
|----------------------------------------------------------------|---------------------|---------|---|--------|-------|----------|-----------|-----|-------|-------|
| Scan(s)                                                        | Sequence            | MH+     | z | P      | XC    | DeltaCn  | Sp        | RSp | Ions  | Count |
| IPI:IPI00218732.3 SWISS-PROT:P27169 TREMBL:B4DX19;Q96P89;Q96P9 |                     |         |   | 0.0005 | 24.2  | 0.0      | 0         |     |       |       |
| 19287468 - 1                                                   | R.IQNILTEEPK.V      | 1184.65 | 2 | 0.001  | 3.049 | 0.518    | 731.0     | 1   | 15/27 |       |
| 19287468 - 1                                                   | K.LLIGTVFHK.A       | 1027.63 | 2 | 0.0005 | 2.467 | 0.391    | 636.3     | 1   | 16/24 |       |
| 19287468 - 1                                                   | K.LLIGTVFHKALYCEL.- | 1777.96 | 3 | 0.02   | 1.300 | 0.501    | 63.0      | 3   | 14/84 |       |

3 of 3 peptide matches reported, 0 removed due to filtering

DTA for scans: 19287468-1  
Precursor ion: 592.83  
Mass type: mono  
Mod's: (M\* +15.99492) C=161.01468

Ion series for charge: +1

| AA | A ions        | B ions        | B* ions | Bo ions | C ions | Y ions        | Y* ions | Yo ions | Z ions |
|----|---------------|---------------|---------|---------|--------|---------------|---------|---------|--------|
| I  | 86.10         | 114.09        |         |         |        |               |         |         |        |
| Q  | 214.16        | <b>242.15</b> |         |         |        | 1071.57       |         |         |        |
| N  | 328.20        | <b>356.19</b> |         |         |        | <b>943.51</b> |         |         |        |
| I  | <b>441.28</b> | <b>469.28</b> |         |         |        | <b>829.47</b> |         |         |        |
| L  | 554.37        | <b>582.36</b> |         |         |        | <b>716.38</b> |         |         |        |
| T  | 655.41        | <b>683.41</b> |         |         |        | <b>603.30</b> |         |         |        |
| E  | 784.46        | <b>812.45</b> |         |         |        | <b>502.25</b> |         |         |        |
| E  | 913.50        | <b>941.49</b> |         |         |        | <b>373.21</b> |         |         |        |
| P  | 1010.55       | 1038.55       |         |         |        | <b>244.17</b> |         |         |        |
| K  |               |               |         |         |        | 147.11        |         |         |        |

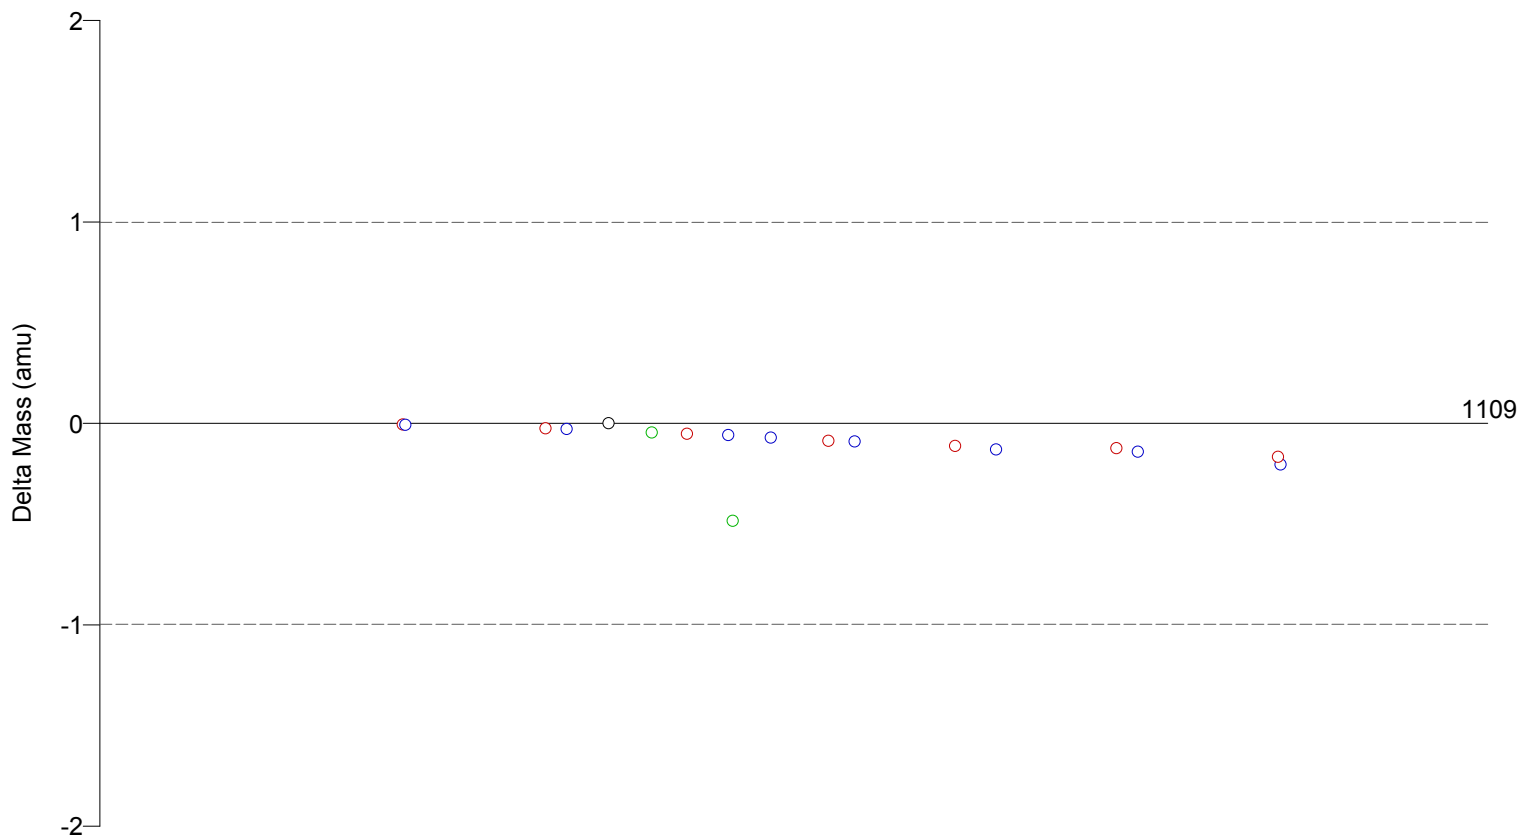

#19287468-1 NL: 1.66E5

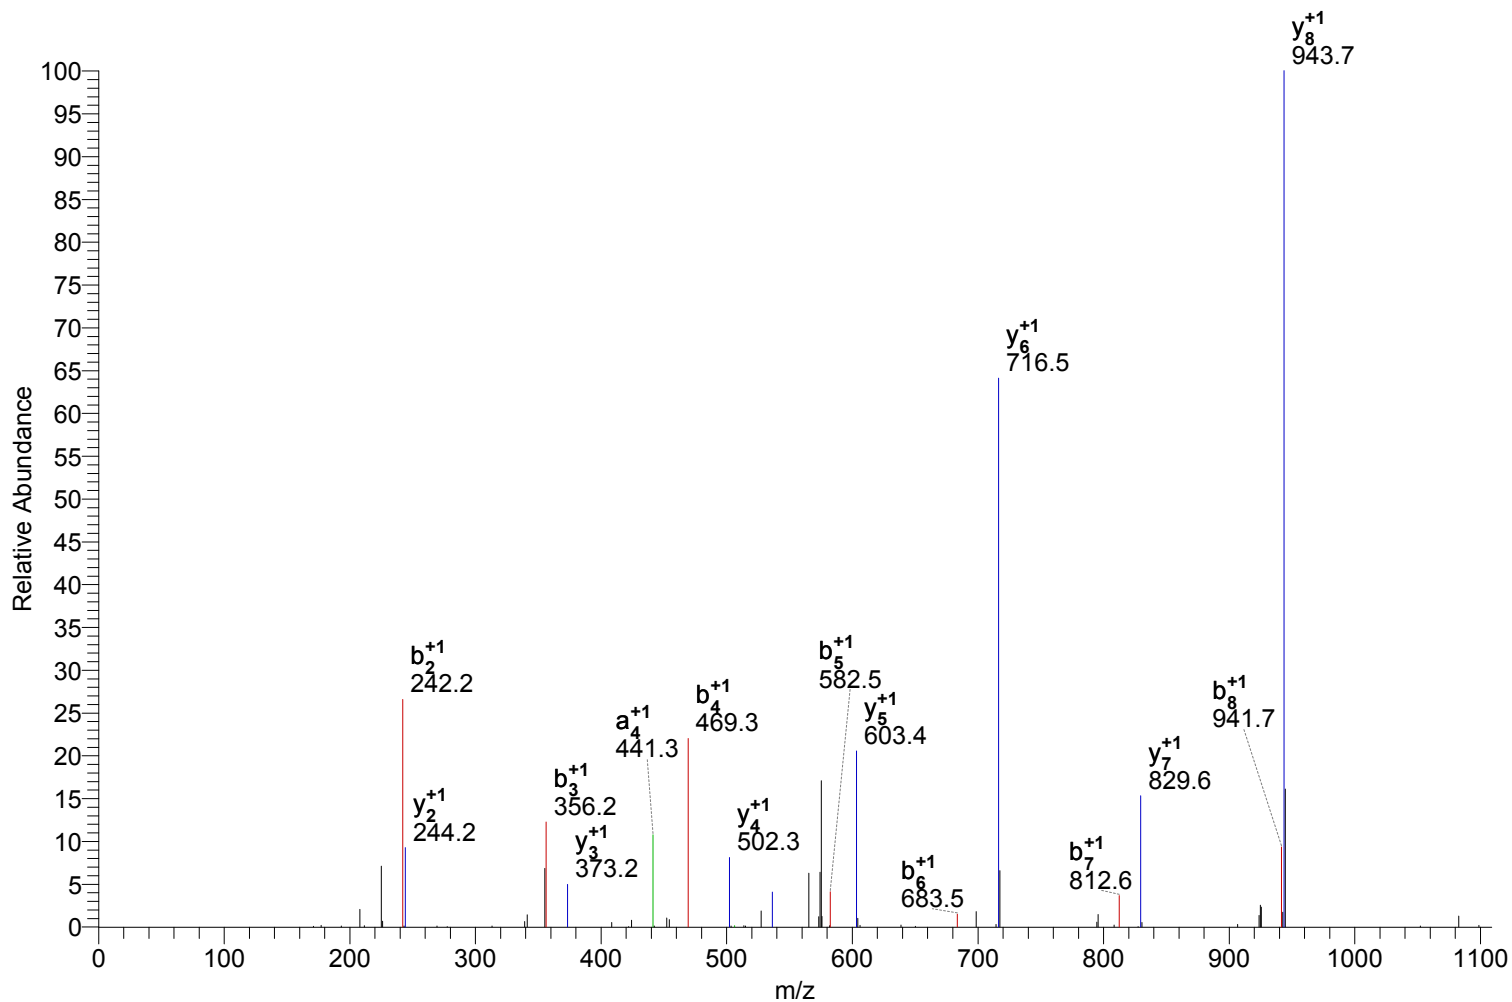

DTA for scans: 19287468-1  
Precursor ion: 514.32  
Mass type: mono  
Mod's: (M\* +15.99492) C=161.01468

Ion series for charge: +1

| AA | A ions        | B ions        | B* ions | Bo ions | C ions | Y ions        | Y* ions | Yo ions | Z ions |
|----|---------------|---------------|---------|---------|--------|---------------|---------|---------|--------|
| L  | 86.10         | 114.09        |         |         |        |               |         |         |        |
| L  | <b>199.18</b> | <b>227.18</b> |         |         |        | <b>914.55</b> |         |         |        |
| I  | 312.26        | <b>340.26</b> |         |         |        | <b>801.46</b> |         |         |        |
| G  | 369.29        | <b>397.28</b> |         |         |        | <b>688.38</b> |         |         |        |
| T  | <b>470.33</b> | <b>498.33</b> |         |         |        | <b>631.36</b> |         |         |        |
| V  | 569.40        | 597.40        |         |         |        | <b>530.31</b> |         |         |        |
| F  | 716.47        | 744.47        |         |         |        | <b>431.24</b> |         |         |        |
| H  | <b>853.53</b> | <b>881.52</b> |         |         |        | <b>284.17</b> |         |         |        |
| K  |               |               |         |         |        | 147.11        |         |         |        |

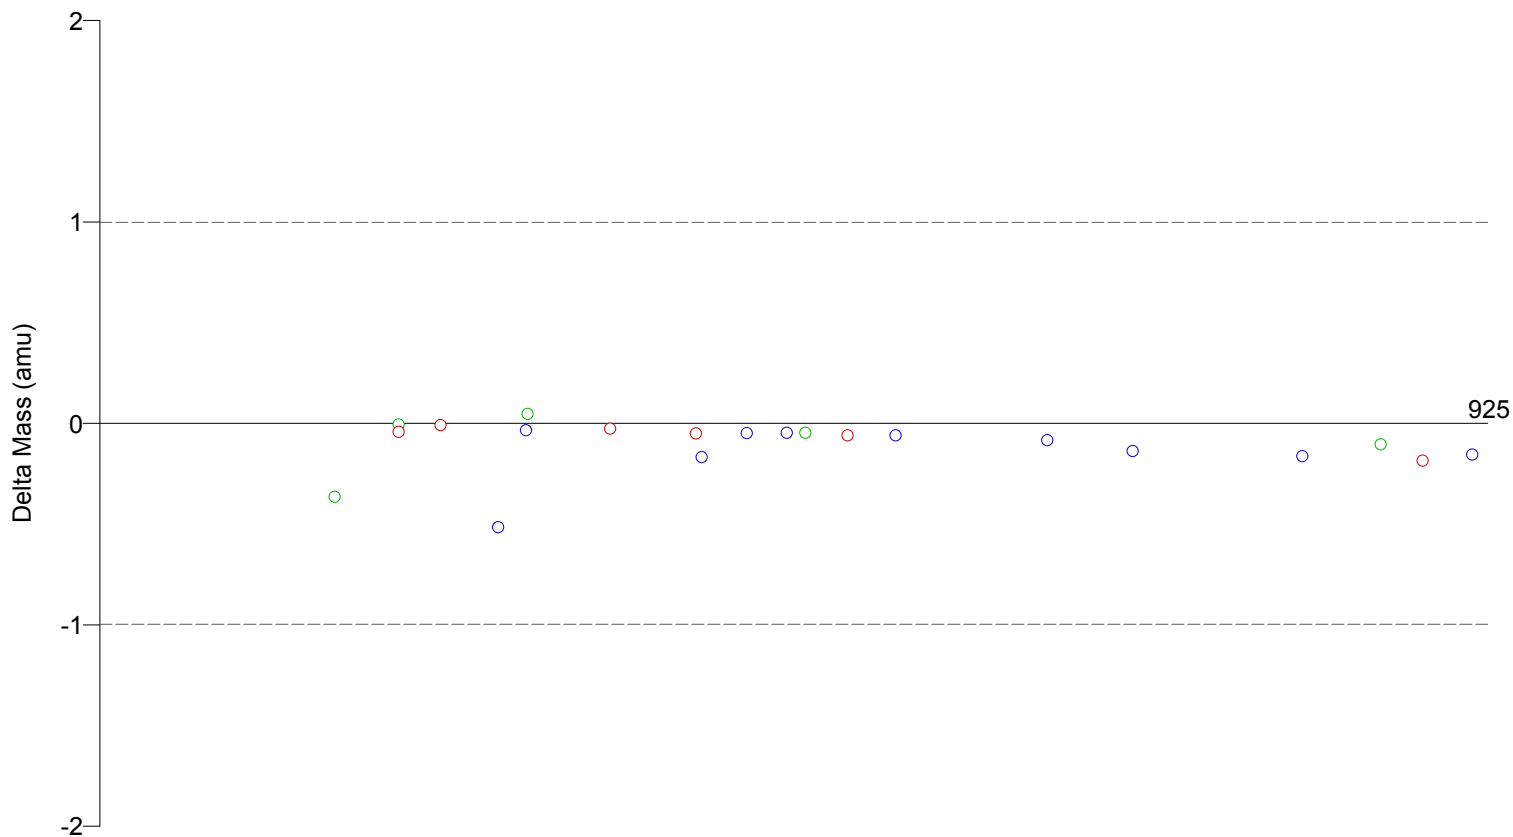

#19287468-1 NL: 2.17E5

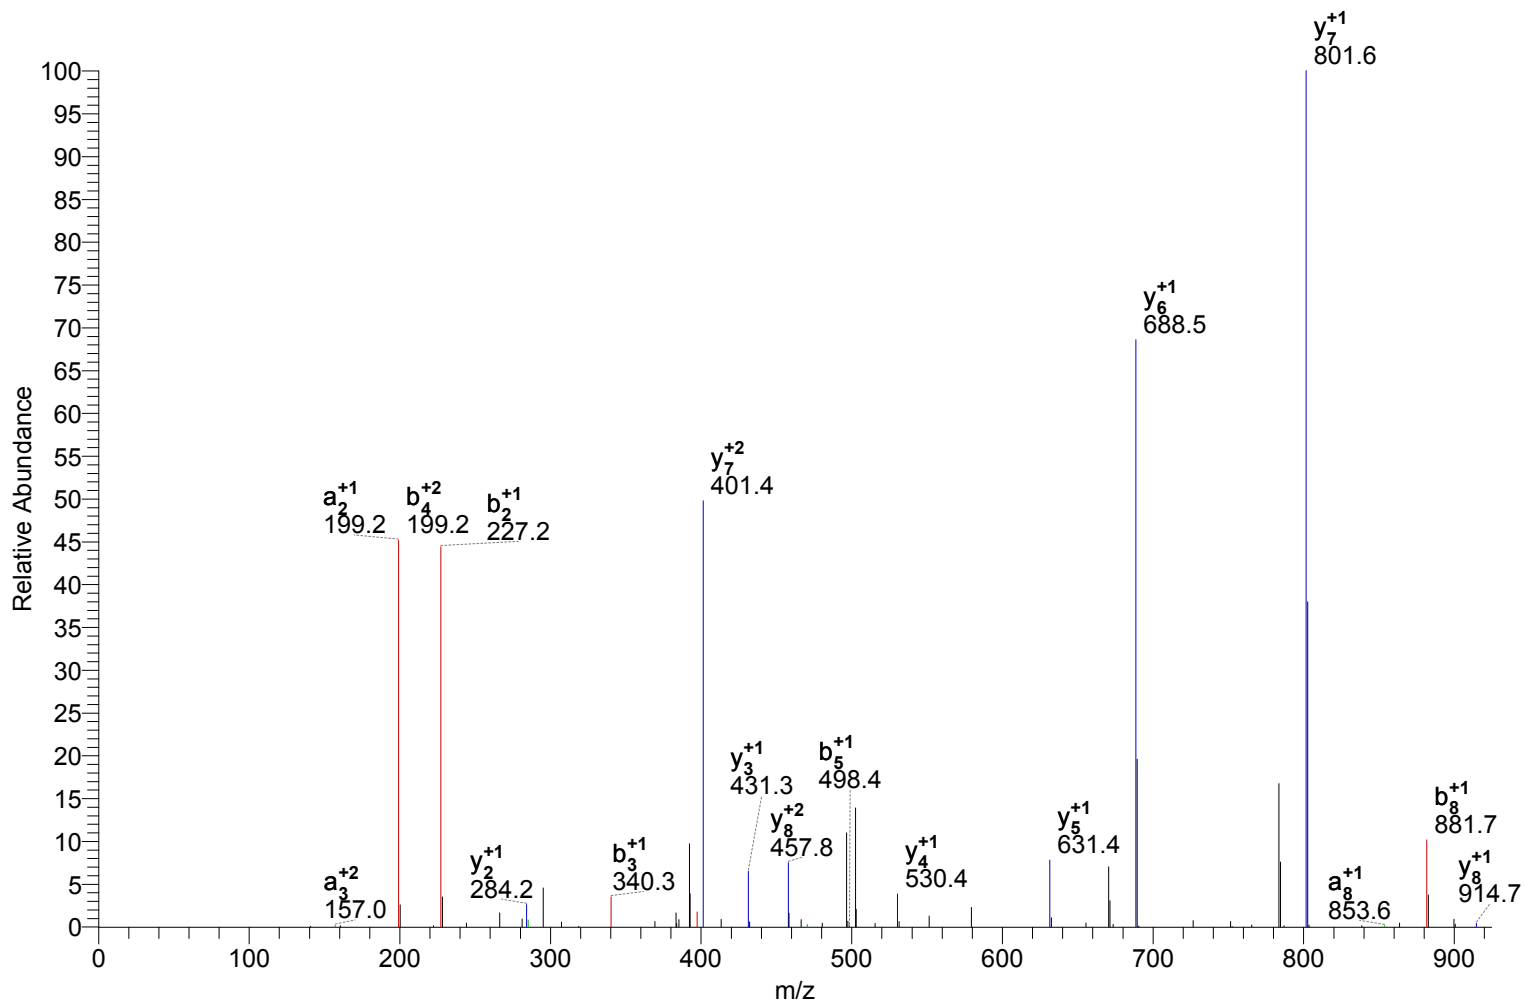

DTA for scans: 19287468-1  
Precursor ion: 593.33  
Mass type: mono  
Mod's: (M\* +15.99492) C=161.01468

Ion series for charge: +1

| AA | A ions        | B ions        | B* ions | Bo ions | C ions | Y ions  | Y* ions | Yo ions | Z ions |
|----|---------------|---------------|---------|---------|--------|---------|---------|---------|--------|
| L  | 86.10         | 114.09        |         |         |        |         |         |         |        |
| L  | <b>199.18</b> | <b>227.18</b> |         |         |        | 1664.87 |         |         |        |
| I  | 312.26        | 340.26        |         |         |        | 1551.79 |         |         |        |
| G  | 369.29        | 397.28        |         |         |        | 1438.70 |         |         |        |
| T  | 470.33        | <b>498.33</b> |         |         |        | 1381.68 |         |         |        |
| V  | 569.40        | 597.40        |         |         |        | 1280.63 |         |         |        |
| F  | 716.47        | 744.47        |         |         |        | 1181.57 |         |         |        |
| H  | 853.53        | 881.52        |         |         |        | 1034.50 |         |         |        |
| K  | 981.62        | 1009.62       |         |         |        | 897.44  |         |         |        |
| A  | 1052.66       | 1080.66       |         |         |        | 769.34  |         |         |        |
| L  | 1165.75       | 1193.74       |         |         |        | 698.31  |         |         |        |
| Y  | 1328.81       | 1356.80       |         |         |        | 585.22  |         |         |        |
| C  | 1489.82       | 1517.82       |         |         |        | 422.16  |         |         |        |
| E  | 1618.87       | 1646.86       |         |         |        | 261.14  |         |         |        |
| L  |               |               |         |         |        | 132.10  |         |         |        |



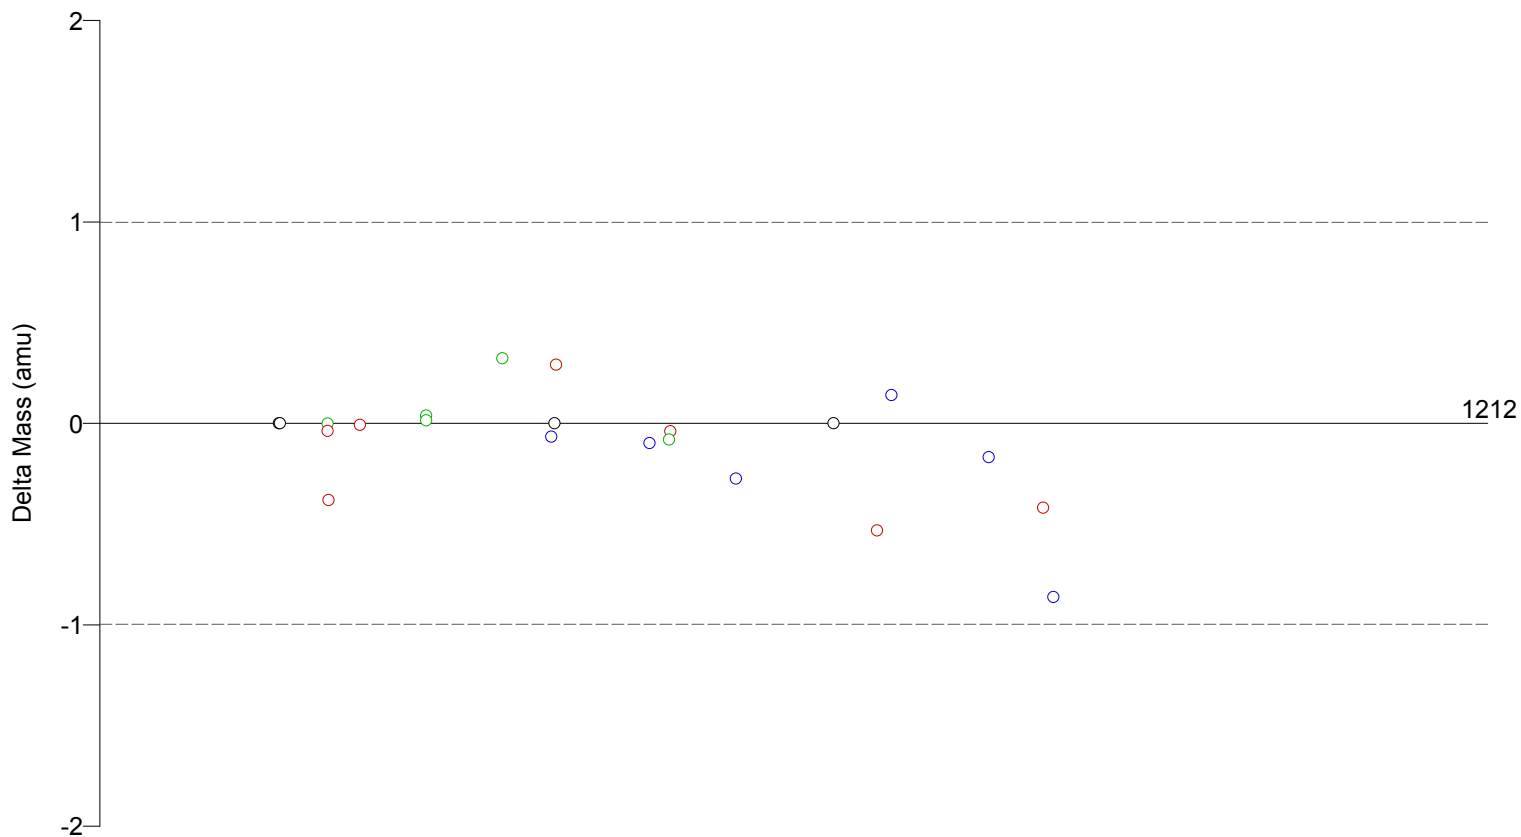

#19287468-1 NL: 6.49E5

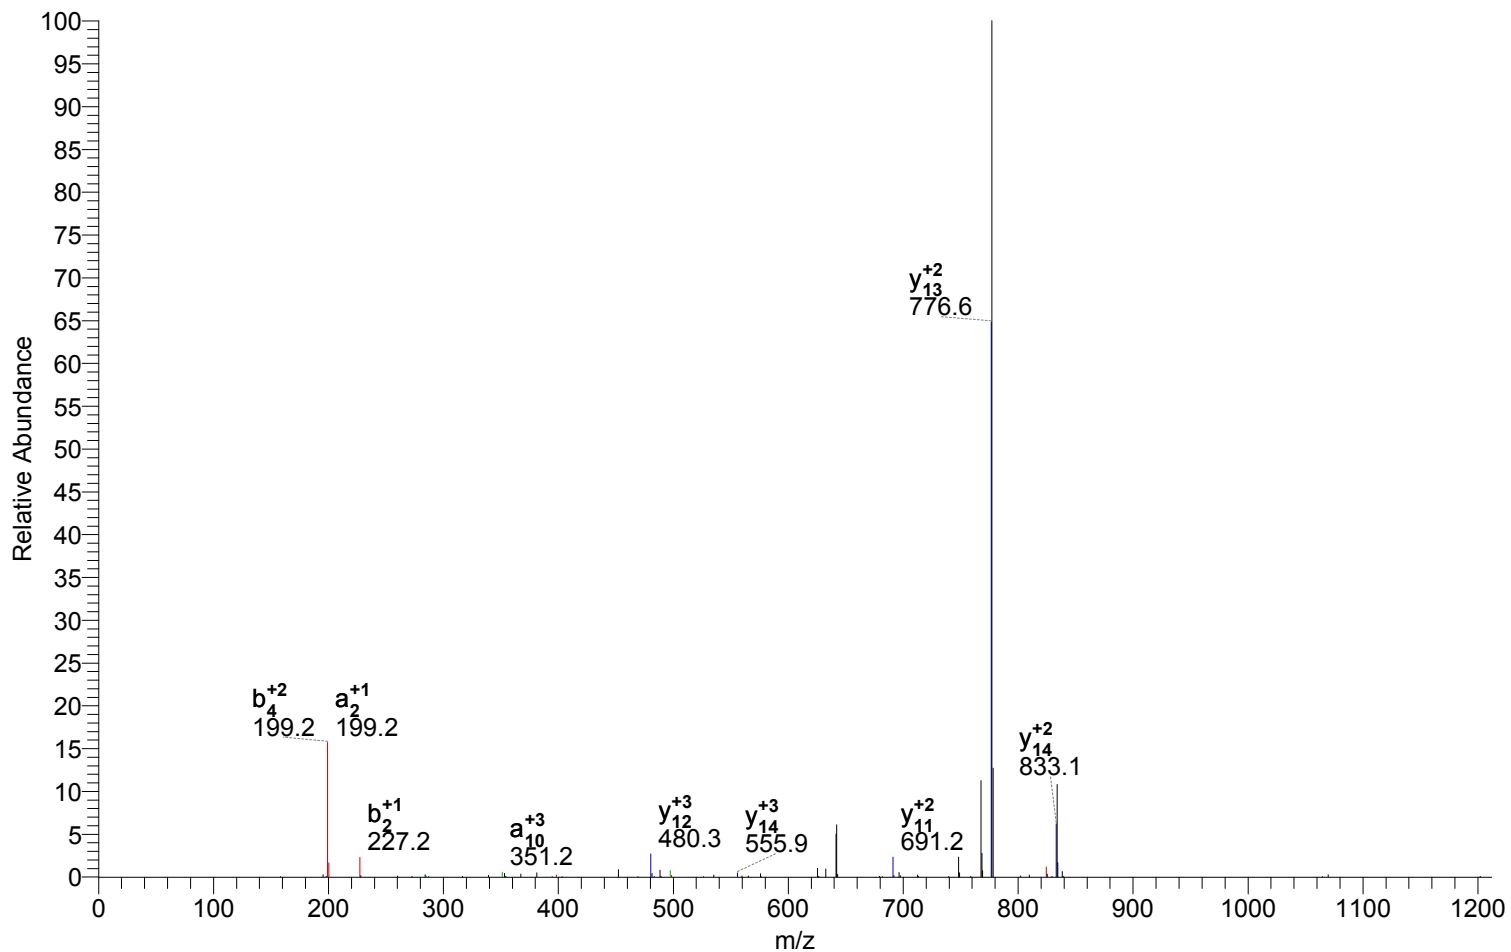

---

| Reference                                                      |                |         |   | P      | Score | Coverage | Accession |     |       |       |  |
|----------------------------------------------------------------|----------------|---------|---|--------|-------|----------|-----------|-----|-------|-------|--|
| Scan(s)                                                        | Sequence       | MH+     | z | P      | XC    | DeltaCn  | Sp        | RSp | Ions  | Count |  |
| IPI:IPI00299778.2 SWISS-PROT:Q15166 TREMBL:A4D1H8 ENSEMBL:ENSP |                |         |   | 0.0005 | 10.1  | 0.0      | 0         |     |       |       |  |
| 19287468 - 1                                                   | K.IILIGTVFHK.T | 1027.63 | 2 | 0.0005 | 2.467 | 0.000    | 636.3     | 1   | 16/24 | 1     |  |

1 of 1 peptide matches reported, 0 removed due to filtering

DTA for scans: 19287468-1  
Precursor ion: 514.32  
Mass type: mono  
Mod's: (M\* +15.99492) C=161.01468

Ion series for charge: +1

| AA | A ions        | B ions        | B* ions | Bo ions | C ions | Y ions        | Y* ions | Yo ions | Z ions |
|----|---------------|---------------|---------|---------|--------|---------------|---------|---------|--------|
| I  | 86.10         | 114.09        |         |         |        |               |         |         |        |
| L  | <b>199.18</b> | <b>227.18</b> |         |         |        | <b>914.55</b> |         |         |        |
| I  | 312.26        | <b>340.26</b> |         |         |        | <b>801.46</b> |         |         |        |
| G  | 369.29        | <b>397.28</b> |         |         |        | <b>688.38</b> |         |         |        |
| T  | <b>470.33</b> | <b>498.33</b> |         |         |        | <b>631.36</b> |         |         |        |
| V  | 569.40        | 597.40        |         |         |        | <b>530.31</b> |         |         |        |
| F  | 716.47        | 744.47        |         |         |        | <b>431.24</b> |         |         |        |
| H  | <b>853.53</b> | <b>881.52</b> |         |         |        | <b>284.17</b> |         |         |        |
| K  |               |               |         |         |        | 147.11        |         |         |        |



#19287468-1 NL: 2.17E5

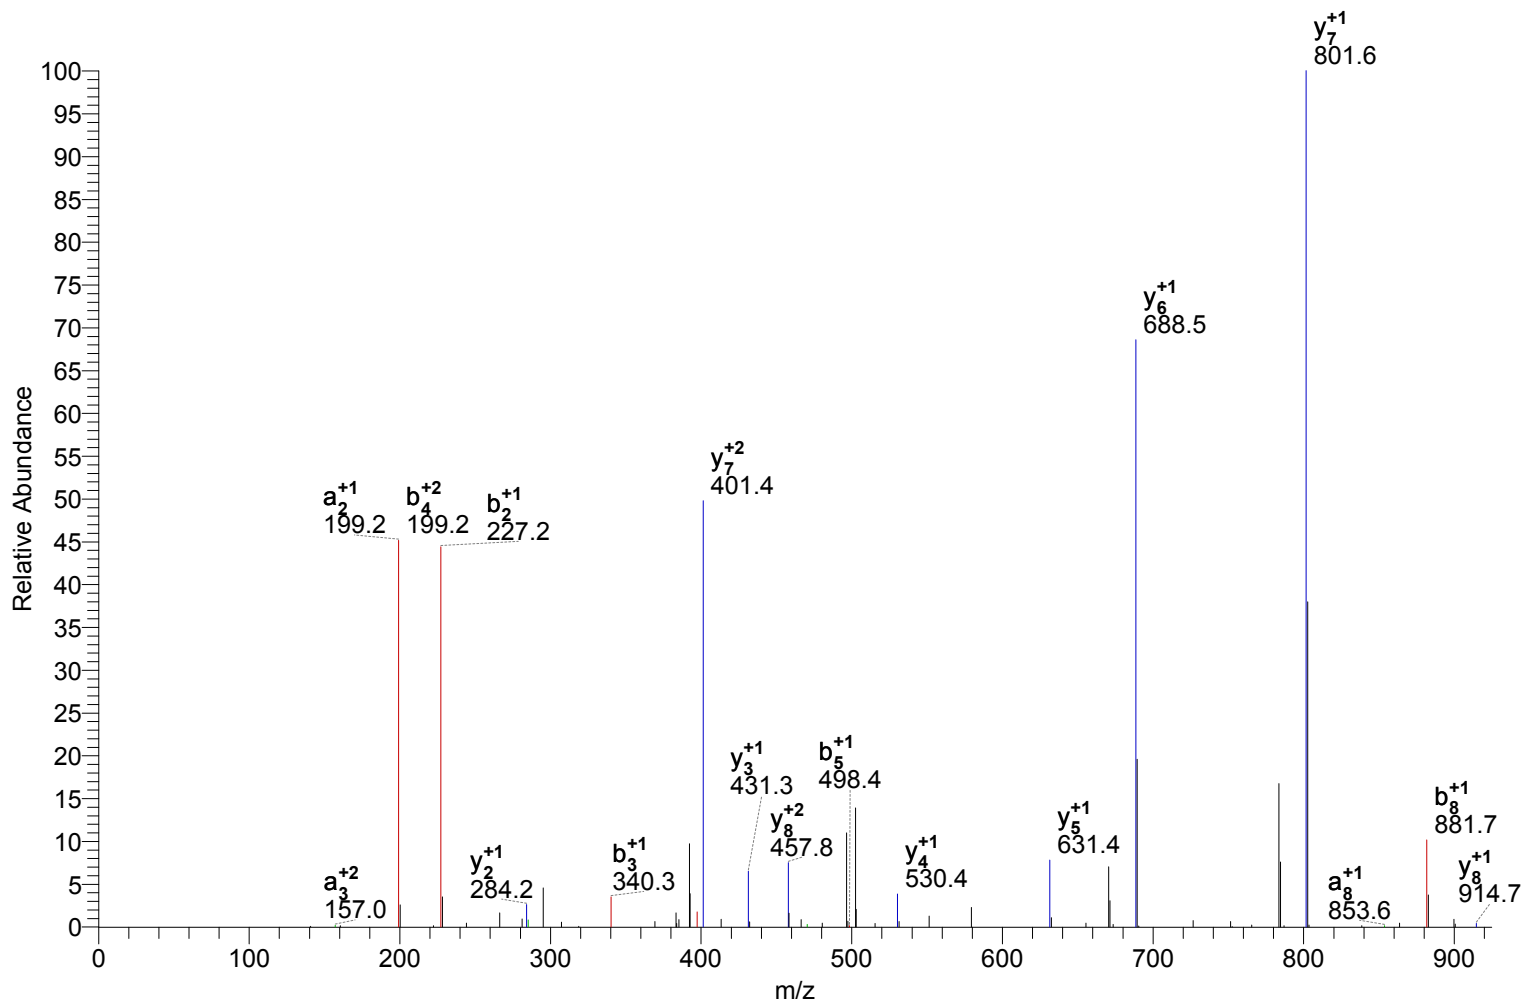

---

| Reference                          |                |         |   | P      | Score | Coverage | Accession |     |       |       |
|------------------------------------|----------------|---------|---|--------|-------|----------|-----------|-----|-------|-------|
| Scan(s)                            | Sequence       | MH+     | z | P      | XC    | DeltaCn  | Sp        | RSp | Ions  | Count |
| IPI:IPI00925751.1 VEGA:OTTHUMP0000 |                |         |   | 0.0005 | 10.1  | 0.0      | 0         |     |       |       |
| 19287468 - 1                       | K.IILIGTVFHK.T | 1027.63 | 2 | 0.0005 | 2.467 | 0.000    | 636.3     | 1   | 16/24 | 1     |

1 of 1 peptide matches reported, 0 removed due to filtering

DTA for scans: 19287468-1  
Precursor ion: 514.32  
Mass type: mono  
Mod's: (M\* +15.99492) C=161.01468

Ion series for charge: +1

| AA | A ions        | B ions        | B* ions | Bo ions | C ions | Y ions        | Y* ions | Yo ions | Z ions |
|----|---------------|---------------|---------|---------|--------|---------------|---------|---------|--------|
| I  | 86.10         | 114.09        |         |         |        |               |         |         |        |
| L  | <b>199.18</b> | <b>227.18</b> |         |         |        | <b>914.55</b> |         |         |        |
| I  | 312.26        | <b>340.26</b> |         |         |        | <b>801.46</b> |         |         |        |
| G  | 369.29        | <b>397.28</b> |         |         |        | <b>688.38</b> |         |         |        |
| T  | <b>470.33</b> | <b>498.33</b> |         |         |        | <b>631.36</b> |         |         |        |
| V  | 569.40        | 597.40        |         |         |        | <b>530.31</b> |         |         |        |
| F  | 716.47        | 744.47        |         |         |        | <b>431.24</b> |         |         |        |
| H  | <b>853.53</b> | <b>881.52</b> |         |         |        | <b>284.17</b> |         |         |        |
| K  |               |               |         |         |        | 147.11        |         |         |        |



#19287468-1 NL: 2.17E5



---

| Reference                          |                  |         |   | P     | Score | Coverage | Accession |     |       |       |
|------------------------------------|------------------|---------|---|-------|-------|----------|-----------|-----|-------|-------|
| Scan(s)                            | Sequence         | MH+     | z | P     | XC    | DeltaCn  | Sp        | RSp | Ions  | Count |
| IPI:IPI00645363.2 TREMBL:Q6N089 Ta |                  |         |   | 0.1   | 18.1  | 0.0      | 0         |     |       |       |
| 19287468 - 1                       | K.NSLYLQM*NSLR.A | 1354.68 | 2 | 0.002 | 2.168 | 0.118    | 607.2     | 1   | 14/30 | 30    |
| 2118291816 -                       | K.GPSVFPLAPSSK.S | 1186.65 | 2 | 0.02  | 2.948 | 0.348    | 465.0     | 1   | 15/33 | 14    |

2 of 2 peptide matches reported, 0 removed due to filtering



DTA for scans: 19287468-1  
Precursor ion: 677.84  
Mass type: mono  
Mod's: (M\* +15.99492) C=161.01468

Ion series for charge: +1

| AA | A ions         | B ions        | B* ions | Bo ions | C ions | Y ions         | Y* ions | Yo ions | Z ions |
|----|----------------|---------------|---------|---------|--------|----------------|---------|---------|--------|
| N  | 87.06          | 115.05        |         |         |        |                |         |         |        |
| S  | 174.09         | 202.08        |         |         |        | 1240.64        |         |         |        |
| L  | 287.17         | <b>315.17</b> |         |         |        | 1153.60        |         |         |        |
| Y  | 450.23         | <b>478.23</b> |         |         |        | <b>1040.52</b> |         |         |        |
| L  | <b>563.32</b>  | <b>591.31</b> |         |         |        | <b>877.46</b>  |         |         |        |
| Q  | 691.38         | 719.37        |         |         |        | <b>764.37</b>  |         |         |        |
| M* | 838.41         | 866.41        |         |         |        | <b>636.31</b>  |         |         |        |
| N  | 952.46         | <b>980.45</b> |         |         |        | <b>489.28</b>  |         |         |        |
| S  | <b>1039.49</b> | 1067.48       |         |         |        | <b>375.24</b>  |         |         |        |
| L  | 1152.57        | 1180.57       |         |         |        | <b>288.20</b>  |         |         |        |
| R  |                |               |         |         |        | 175.12         |         |         |        |



#19287468-1 NL: 8.93E4

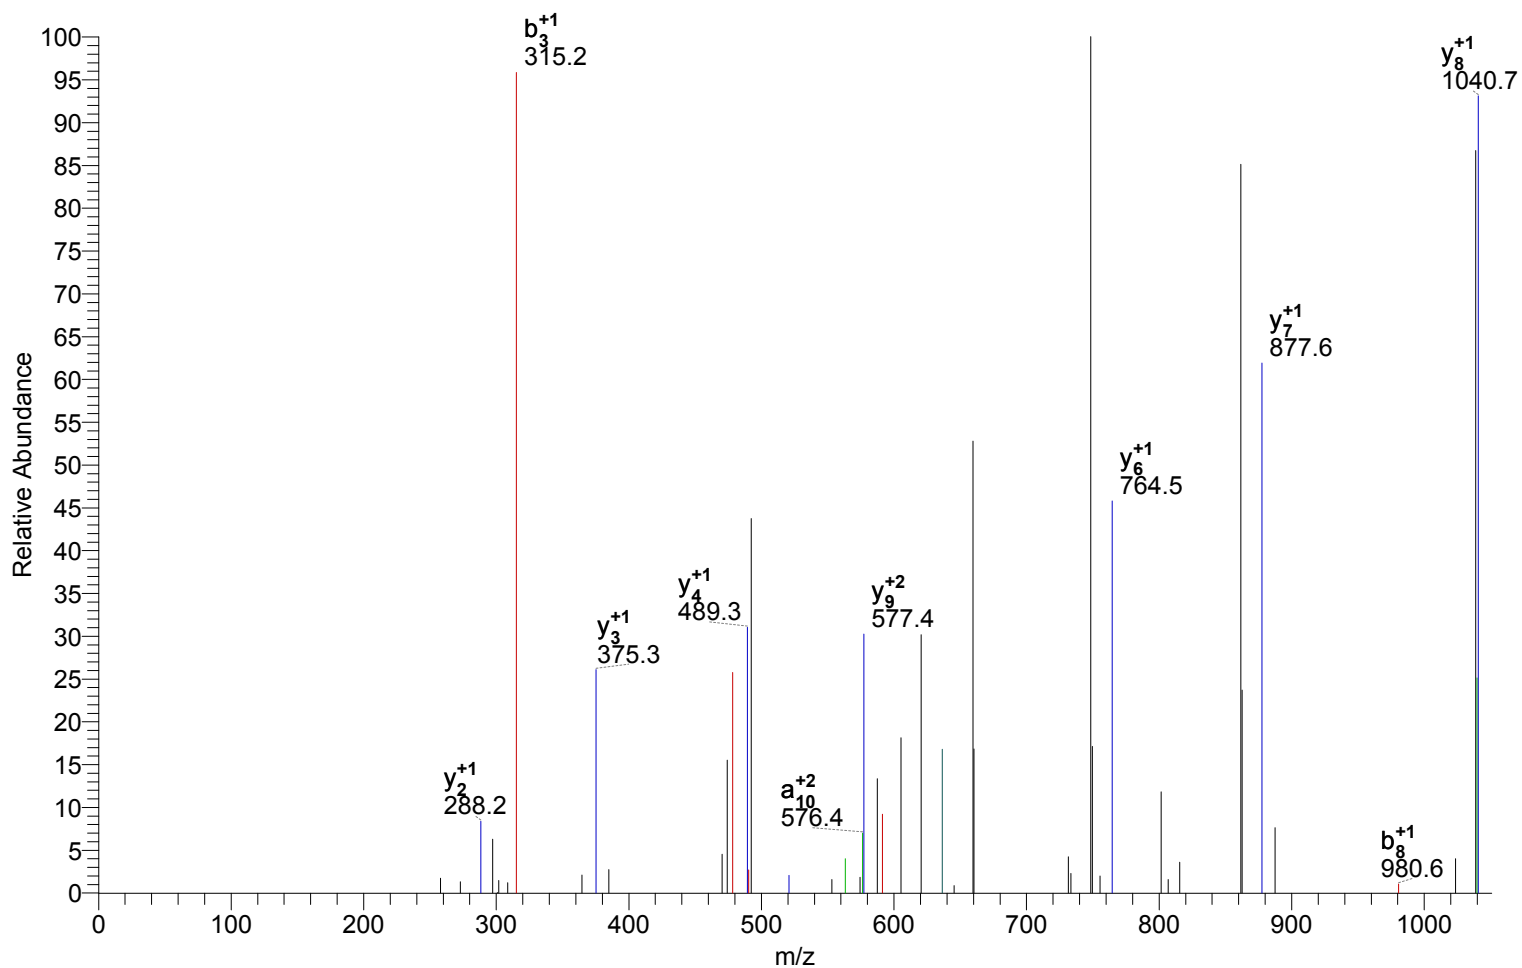

DTA for scans: 2118291816-26226248  
Precursor ion: 593.83  
Mass type: mono  
Mod's: (M\* +15.99492) C=161.01468

Ion series for charge: +1

| AA | A ions        | B ions         | B* ions | Bo ions | C ions | Y ions         | Y* ions | Yo ions | Z ions |
|----|---------------|----------------|---------|---------|--------|----------------|---------|---------|--------|
| G  | 30.03         | 58.03          |         |         |        |                |         |         |        |
| P  | 127.09        | 155.08         |         |         |        | 1129.63        |         |         |        |
| S  | 214.12        | <b>242.11</b>  |         |         |        | <b>1032.57</b> |         |         |        |
| V  | <b>313.19</b> | <b>341.18</b>  |         |         |        | <b>945.54</b>  |         |         |        |
| F  | <b>460.26</b> | <b>488.25</b>  |         |         |        | <b>846.47</b>  |         |         |        |
| P  | 557.31        | 585.30         |         |         |        | <b>699.40</b>  |         |         |        |
| L  | 670.39        | <b>698.39</b>  |         |         |        | <b>602.35</b>  |         |         |        |
| A  | 741.43        | <b>769.42</b>  |         |         |        | <b>489.27</b>  |         |         |        |
| P  | 838.48        | 866.48         |         |         |        | <b>418.23</b>  |         |         |        |
| S  | 925.51        | 953.51         |         |         |        | 321.18         |         |         |        |
| S  | 1012.55       | <b>1040.54</b> |         |         |        | 234.14         |         |         |        |
| K  |               |                |         |         |        | 147.11         |         |         |        |



#2118291816-26226248 NL: 6.95E6



---

| Reference                          |                  |         |   | P     | Score | Coverage | Accession |     |       |       |
|------------------------------------|------------------|---------|---|-------|-------|----------|-----------|-----|-------|-------|
| Scan(s)                            | Sequence         | MH+     | z | P     | XC    | DeltaCn  | Sp        | RSp | Ions  | Count |
| IPI:IPI00930124.1 TREMBL:Q6MZV7 Ta |                  |         |   | 0.1   | 18.1  | 0.0      |           | 0   |       |       |
| 19287468 - 1                       | K.NSLYLQM*NSLR.A | 1354.68 | 2 | 0.002 | 2.168 | 0.118    | 607.2     | 1   | 14/30 | 30    |
| 2118291816 -                       | K.GPSVFPLAPSSK.S | 1186.65 | 2 | 0.02  | 2.948 | 0.348    | 465.0     | 1   | 15/33 | 14    |

2 of 2 peptide matches reported, 0 removed due to filtering

DTA for scans: 19287468-1  
Precursor ion: 677.84  
Mass type: mono  
Mod's: (M\* +15.99492) C=161.01468

Ion series for charge: +1

| AA | A ions         | B ions        | B* ions | Bo ions | C ions | Y ions         | Y* ions | Yo ions | Z ions |
|----|----------------|---------------|---------|---------|--------|----------------|---------|---------|--------|
| N  | 87.06          | 115.05        |         |         |        |                |         |         |        |
| S  | 174.09         | 202.08        |         |         |        | 1240.64        |         |         |        |
| L  | 287.17         | <b>315.17</b> |         |         |        | 1153.60        |         |         |        |
| Y  | 450.23         | <b>478.23</b> |         |         |        | <b>1040.52</b> |         |         |        |
| L  | <b>563.32</b>  | <b>591.31</b> |         |         |        | <b>877.46</b>  |         |         |        |
| Q  | 691.38         | 719.37        |         |         |        | <b>764.37</b>  |         |         |        |
| M* | 838.41         | 866.41        |         |         |        | <b>636.31</b>  |         |         |        |
| N  | 952.46         | <b>980.45</b> |         |         |        | <b>489.28</b>  |         |         |        |
| S  | <b>1039.49</b> | 1067.48       |         |         |        | <b>375.24</b>  |         |         |        |
| L  | 1152.57        | 1180.57       |         |         |        | <b>288.20</b>  |         |         |        |
| R  |                |               |         |         |        | 175.12         |         |         |        |



#19287468-1 NL: 8.93E4



DTA for scans: 2118291816-26226248  
Precursor ion: 593.83  
Mass type: mono  
Mod's: (M\* +15.99492) C=161.01468

Ion series for charge: +1

| AA | A ions        | B ions         | B* ions | Bo ions | C ions | Y ions         | Y* ions | Yo ions | Z ions |
|----|---------------|----------------|---------|---------|--------|----------------|---------|---------|--------|
| G  | 30.03         | 58.03          |         |         |        |                |         |         |        |
| P  | 127.09        | 155.08         |         |         |        | 1129.63        |         |         |        |
| S  | 214.12        | <b>242.11</b>  |         |         |        | <b>1032.57</b> |         |         |        |
| V  | <b>313.19</b> | <b>341.18</b>  |         |         |        | <b>945.54</b>  |         |         |        |
| F  | <b>460.26</b> | <b>488.25</b>  |         |         |        | <b>846.47</b>  |         |         |        |
| P  | 557.31        | 585.30         |         |         |        | <b>699.40</b>  |         |         |        |
| L  | 670.39        | <b>698.39</b>  |         |         |        | <b>602.35</b>  |         |         |        |
| A  | 741.43        | <b>769.42</b>  |         |         |        | <b>489.27</b>  |         |         |        |
| P  | 838.48        | 866.48         |         |         |        | <b>418.23</b>  |         |         |        |
| S  | 925.51        | 953.51         |         |         |        | 321.18         |         |         |        |
| S  | 1012.55       | <b>1040.54</b> |         |         |        | 234.14         |         |         |        |
| K  |               |                |         |         |        | 147.11         |         |         |        |





#2118291816-26226248 NL: 6.95E6



---

| Reference                       |                                |         |   | P     | Score | Coverage | Accession |     |       |       |  |
|---------------------------------|--------------------------------|---------|---|-------|-------|----------|-----------|-----|-------|-------|--|
| Scan(s)                         | Sequence                       | MH+     | z | P     | XC    | DeltaCn  | Sp        | RSp | Ions  | Count |  |
| IPI:IPI00007899.4 TREMBL:Q9HCC1 | Tax_Id=9606 Gene_Symbol=- Sing |         |   | 0.1   | 8.1   | 0.0      | 0         |     |       |       |  |
| 19287468 - 1                    | K.NSLYLQM*NSLR.A               | 1354.68 | 2 | 0.002 | 2.168 | 0.118    | 607.2     | 1   | 14/30 | 30    |  |

1 of 1 peptide matches reported, 0 removed due to filtering

DTA for scans: 19287468-1  
Precursor ion: 677.84  
Mass type: mono  
Mod's: (M\* +15.99492) C=161.01468

Ion series for charge: +1

| AA | A ions         | B ions        | B* ions | Bo ions | C ions | Y ions         | Y* ions | Yo ions | Z ions |
|----|----------------|---------------|---------|---------|--------|----------------|---------|---------|--------|
| N  | 87.06          | 115.05        |         |         |        |                |         |         |        |
| S  | 174.09         | 202.08        |         |         |        | 1240.64        |         |         |        |
| L  | 287.17         | <b>315.17</b> |         |         |        | 1153.60        |         |         |        |
| Y  | 450.23         | <b>478.23</b> |         |         |        | <b>1040.52</b> |         |         |        |
| L  | <b>563.32</b>  | <b>591.31</b> |         |         |        | <b>877.46</b>  |         |         |        |
| Q  | 691.38         | 719.37        |         |         |        | <b>764.37</b>  |         |         |        |
| M* | 838.41         | 866.41        |         |         |        | <b>636.31</b>  |         |         |        |
| N  | 952.46         | <b>980.45</b> |         |         |        | <b>489.28</b>  |         |         |        |
| S  | <b>1039.49</b> | 1067.48       |         |         |        | <b>375.24</b>  |         |         |        |
| L  | 1152.57        | 1180.57       |         |         |        | <b>288.20</b>  |         |         |        |
| R  |                |               |         |         |        | 175.12         |         |         |        |



#19287468-1 NL: 8.93E4



---

| Reference                          |                  |         |   | P     | Score | Coverage | Accession |     |       |       |
|------------------------------------|------------------|---------|---|-------|-------|----------|-----------|-----|-------|-------|
| Scan(s)                            | Sequence         | MH+     | z | P     | XC    | DeltaCn  | Sp        | RSp | Ions  | Count |
| IPI:IPI00382500.1 SWISS-PROT:P0178 |                  |         |   | 0.1   | 8.1   | 0.0      | 0         |     |       |       |
| 19287468 - 1                       | K.NSLYLQM*NSLR.A | 1354.68 | 2 | 0.002 | 2.168 | 0.118    | 607.2     | 1   | 14/30 | 30    |

1 of 1 peptide matches reported, 0 removed due to filtering

DTA for scans: 19287468-1  
Precursor ion: 677.84  
Mass type: mono  
Mod's: (M\* +15.99492) C=161.01468

Ion series for charge: +1

| AA | A ions         | B ions        | B* ions | Bo ions | C ions | Y ions         | Y* ions | Yo ions | Z ions |
|----|----------------|---------------|---------|---------|--------|----------------|---------|---------|--------|
| N  | 87.06          | 115.05        |         |         |        |                |         |         |        |
| S  | 174.09         | 202.08        |         |         |        | 1240.64        |         |         |        |
| L  | 287.17         | <b>315.17</b> |         |         |        | 1153.60        |         |         |        |
| Y  | 450.23         | <b>478.23</b> |         |         |        | <b>1040.52</b> |         |         |        |
| L  | <b>563.32</b>  | <b>591.31</b> |         |         |        | <b>877.46</b>  |         |         |        |
| Q  | 691.38         | 719.37        |         |         |        | <b>764.37</b>  |         |         |        |
| M* | 838.41         | 866.41        |         |         |        | <b>636.31</b>  |         |         |        |
| N  | 952.46         | <b>980.45</b> |         |         |        | <b>489.28</b>  |         |         |        |
| S  | <b>1039.49</b> | 1067.48       |         |         |        | <b>375.24</b>  |         |         |        |
| L  | 1152.57        | 1180.57       |         |         |        | <b>288.20</b>  |         |         |        |
| R  |                |               |         |         |        | 175.12         |         |         |        |



#19287468-1 NL: 8.93E4



---

| Reference                          |                  |         |   | P     | Score | Coverage | Accession |     |       |       |
|------------------------------------|------------------|---------|---|-------|-------|----------|-----------|-----|-------|-------|
| Scan(s)                            | Sequence         | MH+     | z | P     | XC    | DeltaCn  | Sp        | RSp | Ions  | Count |
| IPI:IPI00384391.1 TREMBL:Q9UL71 Ta |                  |         |   | 0.1   | 8.1   | 0.0      |           | 0   |       |       |
| 19287468 - 1                       | K.NSLYLQM*NSLR.A | 1354.68 | 2 | 0.002 | 2.168 | 0.118    | 607.2     | 1   | 14/30 | 30    |

1 of 1 peptide matches reported, 0 removed due to filtering



DTA for scans: 19287468-1  
Precursor ion: 677.84  
Mass type: mono  
Mod's: (M\* +15.99492) C=161.01468

Ion series for charge: +1

| AA | A ions         | B ions        | B* ions | Bo ions | C ions | Y ions         | Y* ions | Yo ions | Z ions |
|----|----------------|---------------|---------|---------|--------|----------------|---------|---------|--------|
| N  | 87.06          | 115.05        |         |         |        |                |         |         |        |
| S  | 174.09         | 202.08        |         |         |        | 1240.64        |         |         |        |
| L  | 287.17         | <b>315.17</b> |         |         |        | 1153.60        |         |         |        |
| Y  | 450.23         | <b>478.23</b> |         |         |        | <b>1040.52</b> |         |         |        |
| L  | <b>563.32</b>  | <b>591.31</b> |         |         |        | <b>877.46</b>  |         |         |        |
| Q  | 691.38         | 719.37        |         |         |        | <b>764.37</b>  |         |         |        |
| M* | 838.41         | 866.41        |         |         |        | <b>636.31</b>  |         |         |        |
| N  | 952.46         | <b>980.45</b> |         |         |        | <b>489.28</b>  |         |         |        |
| S  | <b>1039.49</b> | 1067.48       |         |         |        | <b>375.24</b>  |         |         |        |
| L  | 1152.57        | 1180.57       |         |         |        | <b>288.20</b>  |         |         |        |
| R  |                |               |         |         |        | 175.12         |         |         |        |



#19287468-1 NL: 8.93E4



---

| Reference                          |                  |         |   | P     | Score | Coverage | Accession |     |       |       |
|------------------------------------|------------------|---------|---|-------|-------|----------|-----------|-----|-------|-------|
| Scan(s)                            | Sequence         | MH+     | z | P     | XC    | DeltaCn  | Sp        | RSp | Ions  | Count |
| IPI:IPI00555872.5 TREMBL:Q9UL91 Ta |                  |         |   | 0.1   | 8.1   | 0.0      |           | 0   |       |       |
| 19287468 - 1                       | K.NSLYLQM*NSLR.A | 1354.68 | 2 | 0.002 | 2.168 | 0.118    | 607.2     | 1   | 14/30 | 30    |

1 of 1 peptide matches reported, 0 removed due to filtering

DTA for scans: 19287468-1  
Precursor ion: 677.84  
Mass type: mono  
Mod's: (M\* +15.99492) C=161.01468

Ion series for charge: +1

| AA | A ions         | B ions        | B* ions | Bo ions | C ions | Y ions         | Y* ions | Yo ions | Z ions |
|----|----------------|---------------|---------|---------|--------|----------------|---------|---------|--------|
| N  | 87.06          | 115.05        |         |         |        |                |         |         |        |
| S  | 174.09         | 202.08        |         |         |        | 1240.64        |         |         |        |
| L  | 287.17         | <b>315.17</b> |         |         |        | 1153.60        |         |         |        |
| Y  | 450.23         | <b>478.23</b> |         |         |        | <b>1040.52</b> |         |         |        |
| L  | <b>563.32</b>  | <b>591.31</b> |         |         |        | <b>877.46</b>  |         |         |        |
| Q  | 691.38         | 719.37        |         |         |        | <b>764.37</b>  |         |         |        |
| M* | 838.41         | 866.41        |         |         |        | <b>636.31</b>  |         |         |        |
| N  | 952.46         | <b>980.45</b> |         |         |        | <b>489.28</b>  |         |         |        |
| S  | <b>1039.49</b> | 1067.48       |         |         |        | <b>375.24</b>  |         |         |        |
| L  | 1152.57        | 1180.57       |         |         |        | <b>288.20</b>  |         |         |        |
| R  |                |               |         |         |        | 175.12         |         |         |        |



#19287468-1 NL: 8.93E4



---

| Reference                          |                  |         |   | P     | Score | Coverage | Accession |     |       |       |
|------------------------------------|------------------|---------|---|-------|-------|----------|-----------|-----|-------|-------|
| Scan(s)                            | Sequence         | MH+     | z | P     | XC    | DeltaCn  | Sp        | RSp | Ions  | Count |
| IPI:IPI00782983.2 TREMBL:Q0ZCH4;Q0 |                  |         |   | 0.1   | 8.1   | 0.0      |           | 0   |       |       |
| 19287468 - 1                       | K.NSLYLQM*NSLR.A | 1354.68 | 2 | 0.002 | 2.168 | 0.118    | 607.2     | 1   | 14/30 | 30    |

---

1 of 1 peptide matches reported, 0 removed due to filtering

DTA for scans: 19287468-1  
Precursor ion: 677.84  
Mass type: mono  
Mod's: (M\* +15.99492) C=161.01468

Ion series for charge: +1

| AA | A ions         | B ions        | B* ions | Bo ions | C ions | Y ions         | Y* ions | Yo ions | Z ions |
|----|----------------|---------------|---------|---------|--------|----------------|---------|---------|--------|
| N  | 87.06          | 115.05        |         |         |        |                |         |         |        |
| S  | 174.09         | 202.08        |         |         |        | 1240.64        |         |         |        |
| L  | 287.17         | <b>315.17</b> |         |         |        | 1153.60        |         |         |        |
| Y  | 450.23         | <b>478.23</b> |         |         |        | <b>1040.52</b> |         |         |        |
| L  | <b>563.32</b>  | <b>591.31</b> |         |         |        | <b>877.46</b>  |         |         |        |
| Q  | 691.38         | 719.37        |         |         |        | <b>764.37</b>  |         |         |        |
| M* | 838.41         | 866.41        |         |         |        | <b>636.31</b>  |         |         |        |
| N  | 952.46         | <b>980.45</b> |         |         |        | <b>489.28</b>  |         |         |        |
| S  | <b>1039.49</b> | 1067.48       |         |         |        | <b>375.24</b>  |         |         |        |
| L  | 1152.57        | 1180.57       |         |         |        | <b>288.20</b>  |         |         |        |
| R  |                |               |         |         |        | 175.12         |         |         |        |



#19287468-1 NL: 8.93E4





---

| Reference                          |                  |         |   | P     | Score | Coverage | Accession |     |       |       |
|------------------------------------|------------------|---------|---|-------|-------|----------|-----------|-----|-------|-------|
| Scan(s)                            | Sequence         | MH+     | z | P     | XC    | DeltaCn  | Sp        | RSp | Ions  | Count |
| IPI:IPI00783287.1 TREMBL:Q0ZCH9 Ta |                  |         |   | 0.1   | 8.1   | 0.0      |           | 0   |       |       |
| 19287468 - 1                       | K.NSLYLQM*NSLR.A | 1354.68 | 2 | 0.002 | 2.168 | 0.118    | 607.2     | 1   | 14/30 | 30    |

1 of 1 peptide matches reported, 0 removed due to filtering

DTA for scans: 19287468-1  
Precursor ion: 677.84  
Mass type: mono  
Mod's: (M\* +15.99492) C=161.01468

Ion series for charge: +1

| AA | A ions         | B ions        | B* ions | Bo ions | C ions | Y ions         | Y* ions | Yo ions | Z ions |
|----|----------------|---------------|---------|---------|--------|----------------|---------|---------|--------|
| N  | 87.06          | 115.05        |         |         |        |                |         |         |        |
| S  | 174.09         | 202.08        |         |         |        | 1240.64        |         |         |        |
| L  | 287.17         | <b>315.17</b> |         |         |        | 1153.60        |         |         |        |
| Y  | 450.23         | <b>478.23</b> |         |         |        | <b>1040.52</b> |         |         |        |
| L  | <b>563.32</b>  | <b>591.31</b> |         |         |        | <b>877.46</b>  |         |         |        |
| Q  | 691.38         | 719.37        |         |         |        | <b>764.37</b>  |         |         |        |
| M* | 838.41         | 866.41        |         |         |        | <b>636.31</b>  |         |         |        |
| N  | 952.46         | <b>980.45</b> |         |         |        | <b>489.28</b>  |         |         |        |
| S  | <b>1039.49</b> | 1067.48       |         |         |        | <b>375.24</b>  |         |         |        |
| L  | 1152.57        | 1180.57       |         |         |        | <b>288.20</b>  |         |         |        |
| R  |                |               |         |         |        | 175.12         |         |         |        |



#19287468-1 NL: 8.93E4



---

| Reference                          |                  |         |   | P     | Score | Coverage | Accession |     |       |       |
|------------------------------------|------------------|---------|---|-------|-------|----------|-----------|-----|-------|-------|
| Scan(s)                            | Sequence         | MH+     | z | P     | XC    | DeltaCn  | Sp        | RSp | Ions  | Count |
| IPI:IPI00783451.1 TREMBL:Q0ZCJ5 Ta |                  |         |   | 0.1   | 8.1   | 0.0      |           | 0   |       |       |
| 19287468 - 1                       | K.NSLYLQM*NSLR.A | 1354.68 | 2 | 0.002 | 2.168 | 0.118    | 607.2     | 1   | 14/30 | 30    |

1 of 1 peptide matches reported, 0 removed due to filtering

DTA for scans: 19287468-1  
Precursor ion: 677.84  
Mass type: mono  
Mod's: (M\* +15.99492) C=161.01468

Ion series for charge: +1

| AA | A ions         | B ions        | B* ions | Bo ions | C ions | Y ions         | Y* ions | Yo ions | Z ions |
|----|----------------|---------------|---------|---------|--------|----------------|---------|---------|--------|
| N  | 87.06          | 115.05        |         |         |        |                |         |         |        |
| S  | 174.09         | 202.08        |         |         |        | 1240.64        |         |         |        |
| L  | 287.17         | <b>315.17</b> |         |         |        | 1153.60        |         |         |        |
| Y  | 450.23         | <b>478.23</b> |         |         |        | <b>1040.52</b> |         |         |        |
| L  | <b>563.32</b>  | <b>591.31</b> |         |         |        | <b>877.46</b>  |         |         |        |
| Q  | 691.38         | 719.37        |         |         |        | <b>764.37</b>  |         |         |        |
| M* | 838.41         | 866.41        |         |         |        | <b>636.31</b>  |         |         |        |
| N  | 952.46         | <b>980.45</b> |         |         |        | <b>489.28</b>  |         |         |        |
| S  | <b>1039.49</b> | 1067.48       |         |         |        | <b>375.24</b>  |         |         |        |
| L  | 1152.57        | 1180.57       |         |         |        | <b>288.20</b>  |         |         |        |
| R  |                |               |         |         |        | 175.12         |         |         |        |



#19287468-1 NL: 8.93E4



---

| Reference                          |                  |         |   | P     | Score | Coverage | Accession |     |       |       |
|------------------------------------|------------------|---------|---|-------|-------|----------|-----------|-----|-------|-------|
| Scan(s)                            | Sequence         | MH+     | z | P     | XC    | DeltaCn  | Sp        | RSp | Ions  | Count |
| IPI:IPI00783689.1 TREMBL:Q0ZCF9;Q0 |                  |         |   | 0.1   | 8.1   | 0.0      |           | 0   |       |       |
| 19287468 - 1                       | K.NSLYLQM*NSLR.A | 1354.68 | 2 | 0.002 | 2.168 | 0.118    | 607.2     | 1   | 14/30 | 30    |

---

1 of 1 peptide matches reported, 0 removed due to filtering

DTA for scans: 19287468-1  
Precursor ion: 677.84  
Mass type: mono  
Mod's: (M\* +15.99492) C=161.01468

Ion series for charge: +1

| AA | A ions         | B ions        | B* ions | Bo ions | C ions | Y ions         | Y* ions | Yo ions | Z ions |
|----|----------------|---------------|---------|---------|--------|----------------|---------|---------|--------|
| N  | 87.06          | 115.05        |         |         |        |                |         |         |        |
| S  | 174.09         | 202.08        |         |         |        | 1240.64        |         |         |        |
| L  | 287.17         | <b>315.17</b> |         |         |        | 1153.60        |         |         |        |
| Y  | 450.23         | <b>478.23</b> |         |         |        | <b>1040.52</b> |         |         |        |
| L  | <b>563.32</b>  | <b>591.31</b> |         |         |        | <b>877.46</b>  |         |         |        |
| Q  | 691.38         | 719.37        |         |         |        | <b>764.37</b>  |         |         |        |
| M* | 838.41         | 866.41        |         |         |        | <b>636.31</b>  |         |         |        |
| N  | 952.46         | <b>980.45</b> |         |         |        | <b>489.28</b>  |         |         |        |
| S  | <b>1039.49</b> | 1067.48       |         |         |        | <b>375.24</b>  |         |         |        |
| L  | 1152.57        | 1180.57       |         |         |        | <b>288.20</b>  |         |         |        |
| R  |                |               |         |         |        | 175.12         |         |         |        |





#19287468-1 NL: 8.93E4



---

| Reference                          |                  |         |   | P     | Score | Coverage | Accession |     |       |       |
|------------------------------------|------------------|---------|---|-------|-------|----------|-----------|-----|-------|-------|
| Scan(s)                            | Sequence         | MH+     | z | P     | XC    | DeltaCn  | Sp        | RSp | Ions  | Count |
| IPI:IPI00827690.1 TREMBL:A2NWX2 Ta |                  |         |   | 0.1   | 8.1   | 0.0      |           | 0   |       |       |
| 19287468 - 1                       | K.NSLYLQM*NSLR.A | 1354.68 | 2 | 0.002 | 2.168 | 0.118    | 607.2     | 1   | 14/30 | 30    |

1 of 1 peptide matches reported, 0 removed due to filtering

DTA for scans: 19287468-1  
Precursor ion: 677.84  
Mass type: mono  
Mod's: (M\* +15.99492) C=161.01468

Ion series for charge: +1

| AA | A ions         | B ions        | B* ions | Bo ions | C ions | Y ions         | Y* ions | Yo ions | Z ions |
|----|----------------|---------------|---------|---------|--------|----------------|---------|---------|--------|
| N  | 87.06          | 115.05        |         |         |        |                |         |         |        |
| S  | 174.09         | 202.08        |         |         |        | 1240.64        |         |         |        |
| L  | 287.17         | <b>315.17</b> |         |         |        | 1153.60        |         |         |        |
| Y  | 450.23         | <b>478.23</b> |         |         |        | <b>1040.52</b> |         |         |        |
| L  | <b>563.32</b>  | <b>591.31</b> |         |         |        | <b>877.46</b>  |         |         |        |
| Q  | 691.38         | 719.37        |         |         |        | <b>764.37</b>  |         |         |        |
| M* | 838.41         | 866.41        |         |         |        | <b>636.31</b>  |         |         |        |
| N  | 952.46         | <b>980.45</b> |         |         |        | <b>489.28</b>  |         |         |        |
| S  | <b>1039.49</b> | 1067.48       |         |         |        | <b>375.24</b>  |         |         |        |
| L  | 1152.57        | 1180.57       |         |         |        | <b>288.20</b>  |         |         |        |
| R  |                |               |         |         |        | 175.12         |         |         |        |



#19287468-1 NL: 8.93E4



---

| Reference                          |                  |         |   | P     | Score | Coverage | Accession |     |       |       |
|------------------------------------|------------------|---------|---|-------|-------|----------|-----------|-----|-------|-------|
| Scan(s)                            | Sequence         | MH+     | z | P     | XC    | DeltaCn  | Sp        | RSp | Ions  | Count |
| IPI:IPI00827733.1 TREMBL:A2NWX3 Ta |                  |         |   | 0.1   | 8.1   | 0.0      | 0         |     |       |       |
| 19287468 - 1                       | K.NSLYLQM*NSLR.A | 1354.68 | 2 | 0.002 | 2.168 | 0.118    | 607.2     | 1   | 14/30 | 30    |

1 of 1 peptide matches reported, 0 removed due to filtering

DTA for scans: 19287468-1  
Precursor ion: 677.84  
Mass type: mono  
Mod's: (M\* +15.99492) C=161.01468

Ion series for charge: +1

| AA | A ions         | B ions        | B* ions | Bo ions | C ions | Y ions         | Y* ions | Yo ions | Z ions |
|----|----------------|---------------|---------|---------|--------|----------------|---------|---------|--------|
| N  | 87.06          | 115.05        |         |         |        |                |         |         |        |
| S  | 174.09         | 202.08        |         |         |        | 1240.64        |         |         |        |
| L  | 287.17         | <b>315.17</b> |         |         |        | 1153.60        |         |         |        |
| Y  | 450.23         | <b>478.23</b> |         |         |        | <b>1040.52</b> |         |         |        |
| L  | <b>563.32</b>  | <b>591.31</b> |         |         |        | <b>877.46</b>  |         |         |        |
| Q  | 691.38         | 719.37        |         |         |        | <b>764.37</b>  |         |         |        |
| M* | 838.41         | 866.41        |         |         |        | <b>636.31</b>  |         |         |        |
| N  | 952.46         | <b>980.45</b> |         |         |        | <b>489.28</b>  |         |         |        |
| S  | <b>1039.49</b> | 1067.48       |         |         |        | <b>375.24</b>  |         |         |        |
| L  | 1152.57        | 1180.57       |         |         |        | <b>288.20</b>  |         |         |        |
| R  |                |               |         |         |        | 175.12         |         |         |        |



#19287468-1 NL: 8.93E4



---

| Reference                          |                  |         |   | P     | Score | Coverage | Accession |     |       |       |
|------------------------------------|------------------|---------|---|-------|-------|----------|-----------|-----|-------|-------|
| Scan(s)                            | Sequence         | MH+     | z | P     | XC    | DeltaCn  | Sp        | RSp | Ions  | Count |
| IPI:IPI00829752.1 TREMBL:A6NK61 EN |                  |         |   | 0.1   | 8.1   | 0.0      |           | 0   |       |       |
| 19287468 - 1                       | K.NSLYLQM*NSLR.A | 1354.68 | 2 | 0.002 | 2.168 | 0.118    | 607.2     | 1   | 14/30 | 30    |

1 of 1 peptide matches reported, 0 removed due to filtering



DTA for scans: 19287468-1  
Precursor ion: 677.84  
Mass type: mono  
Mod's: (M\* +15.99492) C=161.01468

Ion series for charge: +1

| AA | A ions         | B ions        | B* ions | Bo ions | C ions | Y ions         | Y* ions | Yo ions | Z ions |
|----|----------------|---------------|---------|---------|--------|----------------|---------|---------|--------|
| N  | 87.06          | 115.05        |         |         |        |                |         |         |        |
| S  | 174.09         | 202.08        |         |         |        | 1240.64        |         |         |        |
| L  | 287.17         | <b>315.17</b> |         |         |        | 1153.60        |         |         |        |
| Y  | 450.23         | <b>478.23</b> |         |         |        | <b>1040.52</b> |         |         |        |
| L  | <b>563.32</b>  | <b>591.31</b> |         |         |        | <b>877.46</b>  |         |         |        |
| Q  | 691.38         | 719.37        |         |         |        | <b>764.37</b>  |         |         |        |
| M* | 838.41         | 866.41        |         |         |        | <b>636.31</b>  |         |         |        |
| N  | 952.46         | <b>980.45</b> |         |         |        | <b>489.28</b>  |         |         |        |
| S  | <b>1039.49</b> | 1067.48       |         |         |        | <b>375.24</b>  |         |         |        |
| L  | 1152.57        | 1180.57       |         |         |        | <b>288.20</b>  |         |         |        |
| R  |                |               |         |         |        | 175.12         |         |         |        |



#19287468-1 NL: 8.93E4



---

| Reference                          |                  |         |   | P     | Score | Coverage | Accession |     |       |       |
|------------------------------------|------------------|---------|---|-------|-------|----------|-----------|-----|-------|-------|
| Scan(s)                            | Sequence         | MH+     | z | P     | XC    | DeltaCn  | Sp        | RSp | Ions  | Count |
| IPI:IPI00829812.2 TREMBL:A6NHF5 EN |                  |         |   | 0.1   | 8.1   | 0.0      |           | 0   |       |       |
| 19287468 - 1                       | K.NSLYLQM*NSLR.A | 1354.68 | 2 | 0.002 | 2.168 | 0.118    | 607.2     | 1   | 14/30 | 30    |

1 of 1 peptide matches reported, 0 removed due to filtering

DTA for scans: 19287468-1  
Precursor ion: 677.84  
Mass type: mono  
Mod's: (M\* +15.99492) C=161.01468

Ion series for charge: +1

| AA | A ions         | B ions        | B* ions | Bo ions | C ions | Y ions         | Y* ions | Yo ions | Z ions |
|----|----------------|---------------|---------|---------|--------|----------------|---------|---------|--------|
| N  | 87.06          | 115.05        |         |         |        |                |         |         |        |
| S  | 174.09         | 202.08        |         |         |        | 1240.64        |         |         |        |
| L  | 287.17         | <b>315.17</b> |         |         |        | 1153.60        |         |         |        |
| Y  | 450.23         | <b>478.23</b> |         |         |        | <b>1040.52</b> |         |         |        |
| L  | <b>563.32</b>  | <b>591.31</b> |         |         |        | <b>877.46</b>  |         |         |        |
| Q  | 691.38         | 719.37        |         |         |        | <b>764.37</b>  |         |         |        |
| M* | 838.41         | 866.41        |         |         |        | <b>636.31</b>  |         |         |        |
| N  | 952.46         | <b>980.45</b> |         |         |        | <b>489.28</b>  |         |         |        |
| S  | <b>1039.49</b> | 1067.48       |         |         |        | <b>375.24</b>  |         |         |        |
| L  | 1152.57        | 1180.57       |         |         |        | <b>288.20</b>  |         |         |        |
| R  |                |               |         |         |        | 175.12         |         |         |        |



#19287468-1 NL: 8.93E4



---

| Reference                          |                  |         |   | P     | Score | Coverage | Accession |     |       |       |
|------------------------------------|------------------|---------|---|-------|-------|----------|-----------|-----|-------|-------|
| Scan(s)                            | Sequence         | MH+     | z | P     | XC    | DeltaCn  | Sp        | RSp | Ions  | Count |
| IPI:IPI00854667.1 TREMBL:A6NKU8 EN |                  |         |   | 0.1   | 8.1   | 0.0      |           | 0   |       |       |
| 19287468 - 1                       | K.NSLYLQM*NSLR.A | 1354.68 | 2 | 0.002 | 2.168 | 0.118    | 607.2     | 1   | 14/30 | 30    |

1 of 1 peptide matches reported, 0 removed due to filtering

DTA for scans: 19287468-1  
Precursor ion: 677.84  
Mass type: mono  
Mod's: (M\* +15.99492) C=161.01468

Ion series for charge: +1

| AA | A ions         | B ions        | B* ions | Bo ions | C ions | Y ions         | Y* ions | Yo ions | Z ions |
|----|----------------|---------------|---------|---------|--------|----------------|---------|---------|--------|
| N  | 87.06          | 115.05        |         |         |        |                |         |         |        |
| S  | 174.09         | 202.08        |         |         |        | 1240.64        |         |         |        |
| L  | 287.17         | <b>315.17</b> |         |         |        | 1153.60        |         |         |        |
| Y  | 450.23         | <b>478.23</b> |         |         |        | <b>1040.52</b> |         |         |        |
| L  | <b>563.32</b>  | <b>591.31</b> |         |         |        | <b>877.46</b>  |         |         |        |
| Q  | 691.38         | 719.37        |         |         |        | <b>764.37</b>  |         |         |        |
| M* | 838.41         | 866.41        |         |         |        | <b>636.31</b>  |         |         |        |
| N  | 952.46         | <b>980.45</b> |         |         |        | <b>489.28</b>  |         |         |        |
| S  | <b>1039.49</b> | 1067.48       |         |         |        | <b>375.24</b>  |         |         |        |
| L  | 1152.57        | 1180.57       |         |         |        | <b>288.20</b>  |         |         |        |
| R  |                |               |         |         |        | 175.12         |         |         |        |



#19287468-1 NL: 8.93E4

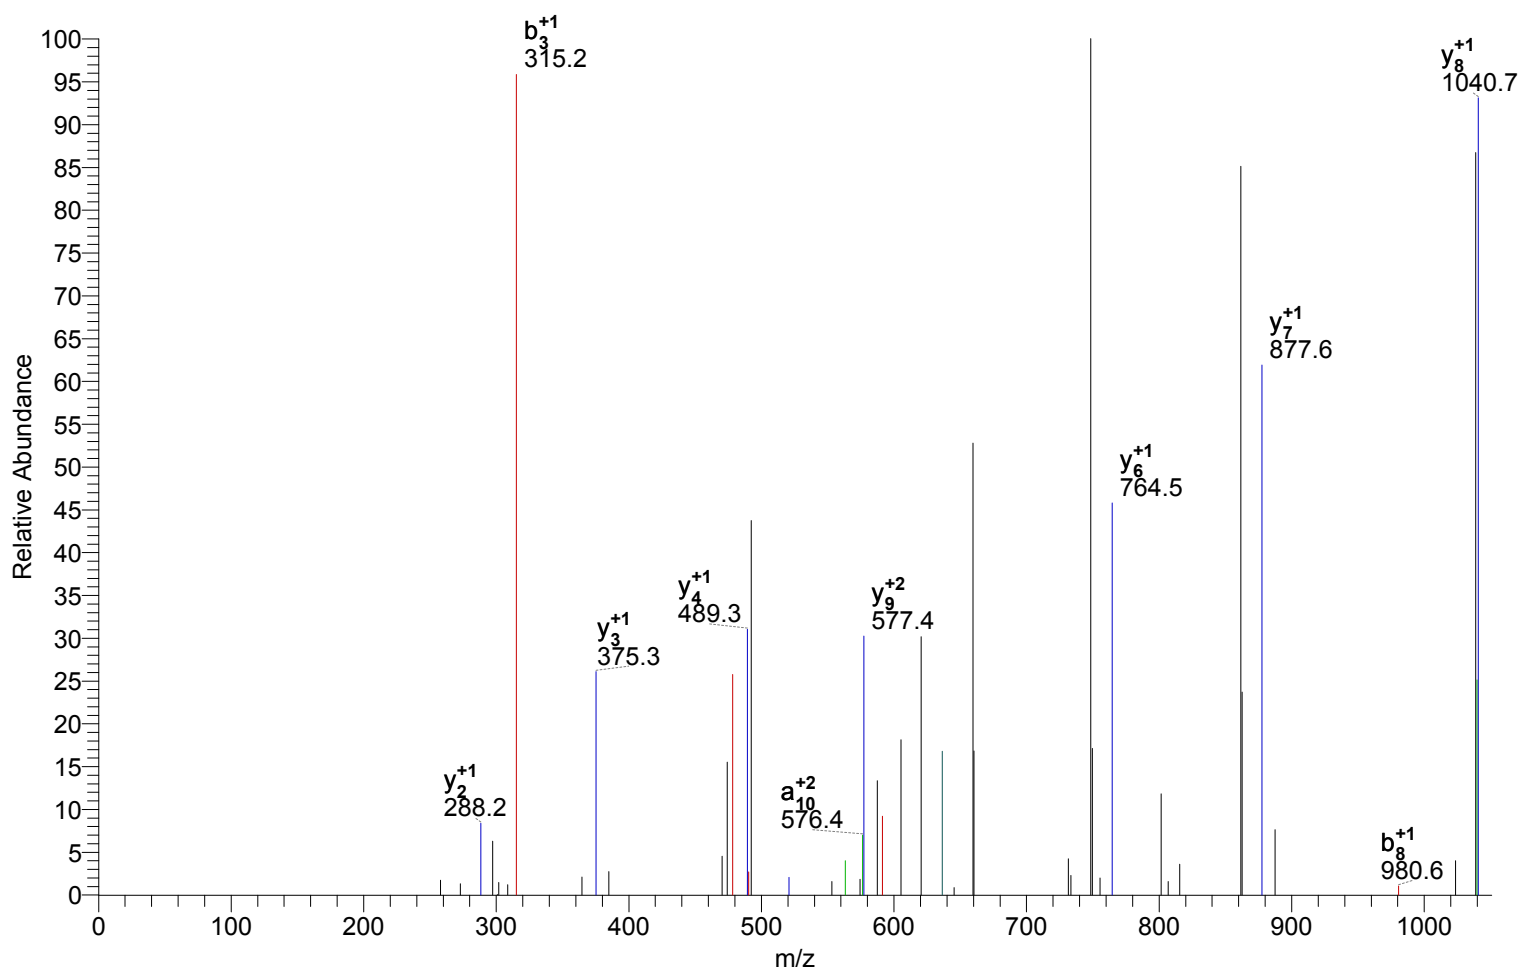



---

| Reference                          |                  |         |   | P     | Score | Coverage | Accession |     |       |       |
|------------------------------------|------------------|---------|---|-------|-------|----------|-----------|-----|-------|-------|
| Scan(s)                            | Sequence         | MH+     | z | P     | XC    | DeltaCn  | Sp        | RSp | Ions  | Count |
| IPI:IPI00854841.1 TREMBL:A6NL39 EN |                  |         |   | 0.1   | 8.1   | 0.0      |           | 0   |       |       |
| 19287468 - 1                       | K.NSLYLQM*NSLR.A | 1354.68 | 2 | 0.002 | 2.168 | 0.118    | 607.2     | 1   | 14/30 | 30    |

1 of 1 peptide matches reported, 0 removed due to filtering

DTA for scans: 19287468-1  
Precursor ion: 677.84  
Mass type: mono  
Mod's: (M\* +15.99492) C=161.01468

Ion series for charge: +1

| AA | A ions         | B ions        | B* ions | Bo ions | C ions | Y ions         | Y* ions | Yo ions | Z ions |
|----|----------------|---------------|---------|---------|--------|----------------|---------|---------|--------|
| N  | 87.06          | 115.05        |         |         |        |                |         |         |        |
| S  | 174.09         | 202.08        |         |         |        | 1240.64        |         |         |        |
| L  | 287.17         | <b>315.17</b> |         |         |        | 1153.60        |         |         |        |
| Y  | 450.23         | <b>478.23</b> |         |         |        | <b>1040.52</b> |         |         |        |
| L  | <b>563.32</b>  | <b>591.31</b> |         |         |        | <b>877.46</b>  |         |         |        |
| Q  | 691.38         | 719.37        |         |         |        | <b>764.37</b>  |         |         |        |
| M* | 838.41         | 866.41        |         |         |        | <b>636.31</b>  |         |         |        |
| N  | 952.46         | <b>980.45</b> |         |         |        | <b>489.28</b>  |         |         |        |
| S  | <b>1039.49</b> | 1067.48       |         |         |        | <b>375.24</b>  |         |         |        |
| L  | 1152.57        | 1180.57       |         |         |        | <b>288.20</b>  |         |         |        |
| R  |                |               |         |         |        | 175.12         |         |         |        |



#19287468-1 NL: 8.93E4



---

| Reference                          |                  |         |   | P     | Score | Coverage | Accession |     |       |       |
|------------------------------------|------------------|---------|---|-------|-------|----------|-----------|-----|-------|-------|
| Scan(s)                            | Sequence         | MH+     | z | P     | XC    | DeltaCn  | Sp        | RSp | Ions  | Count |
| IPI:IPI00884078.2 TREMBL:A2J1N2 EN |                  |         |   | 0.1   | 8.1   | 0.0      |           | 0   |       |       |
| 19287468 - 1                       | K.NSLYLQM*NSLR.A | 1354.68 | 2 | 0.002 | 2.168 | 0.118    | 607.2     | 1   | 14/30 | 30    |

1 of 1 peptide matches reported, 0 removed due to filtering

DTA for scans: 19287468-1  
Precursor ion: 677.84  
Mass type: mono  
Mod's: (M\* +15.99492) C=161.01468

Ion series for charge: +1

| AA | A ions         | B ions        | B* ions | Bo ions | C ions | Y ions         | Y* ions | Yo ions | Z ions |
|----|----------------|---------------|---------|---------|--------|----------------|---------|---------|--------|
| N  | 87.06          | 115.05        |         |         |        |                |         |         |        |
| S  | 174.09         | 202.08        |         |         |        | 1240.64        |         |         |        |
| L  | 287.17         | <b>315.17</b> |         |         |        | 1153.60        |         |         |        |
| Y  | 450.23         | <b>478.23</b> |         |         |        | <b>1040.52</b> |         |         |        |
| L  | <b>563.32</b>  | <b>591.31</b> |         |         |        | <b>877.46</b>  |         |         |        |
| Q  | 691.38         | 719.37        |         |         |        | <b>764.37</b>  |         |         |        |
| M* | 838.41         | 866.41        |         |         |        | <b>636.31</b>  |         |         |        |
| N  | 952.46         | <b>980.45</b> |         |         |        | <b>489.28</b>  |         |         |        |
| S  | <b>1039.49</b> | 1067.48       |         |         |        | <b>375.24</b>  |         |         |        |
| L  | 1152.57        | 1180.57       |         |         |        | <b>288.20</b>  |         |         |        |
| R  |                |               |         |         |        | 175.12         |         |         |        |



#19287468-1 NL: 8.93E4



---

| Reference                          |                  |         |   | P     | Score | Coverage | Accession |     |       |       |
|------------------------------------|------------------|---------|---|-------|-------|----------|-----------|-----|-------|-------|
| Scan(s)                            | Sequence         | MH+     | z | P     | XC    | DeltaCn  | Sp        | RSp | Ions  | Count |
| IPI:IPI00884183.1 TREMBL:Q9ULB6 Ta |                  |         |   | 0.1   | 8.1   | 0.0      |           | 0   |       |       |
| 19287468 - 1                       | K.NSLYLQM*NSLR.A | 1354.68 | 2 | 0.002 | 2.168 | 0.118    | 607.2     | 1   | 14/30 | 30    |

1 of 1 peptide matches reported, 0 removed due to filtering

DTA for scans: 19287468-1  
Precursor ion: 677.84  
Mass type: mono  
Mod's: (M\* +15.99492) C=161.01468

Ion series for charge: +1

| AA | A ions         | B ions        | B* ions | Bo ions | C ions | Y ions         | Y* ions | Yo ions | Z ions |
|----|----------------|---------------|---------|---------|--------|----------------|---------|---------|--------|
| N  | 87.06          | 115.05        |         |         |        |                |         |         |        |
| S  | 174.09         | 202.08        |         |         |        | 1240.64        |         |         |        |
| L  | 287.17         | <b>315.17</b> |         |         |        | 1153.60        |         |         |        |
| Y  | 450.23         | <b>478.23</b> |         |         |        | <b>1040.52</b> |         |         |        |
| L  | <b>563.32</b>  | <b>591.31</b> |         |         |        | <b>877.46</b>  |         |         |        |
| Q  | 691.38         | 719.37        |         |         |        | <b>764.37</b>  |         |         |        |
| M* | 838.41         | 866.41        |         |         |        | <b>636.31</b>  |         |         |        |
| N  | 952.46         | <b>980.45</b> |         |         |        | <b>489.28</b>  |         |         |        |
| S  | <b>1039.49</b> | 1067.48       |         |         |        | <b>375.24</b>  |         |         |        |
| L  | 1152.57        | 1180.57       |         |         |        | <b>288.20</b>  |         |         |        |
| R  |                |               |         |         |        | 175.12         |         |         |        |





#19287468-1 NL: 8.93E4



---

| Reference                          |                  |         |   | P     | Score | Coverage | Accession |     |       |       |
|------------------------------------|------------------|---------|---|-------|-------|----------|-----------|-----|-------|-------|
| Scan(s)                            | Sequence         | MH+     | z | P     | XC    | DeltaCn  | Sp        | RSp | Ions  | Count |
| IPI:IPI00894177.2 TREMBL:Q9UL87 VE |                  |         |   | 0.1   | 8.1   | 0.0      |           | 0   |       |       |
| 19287468 - 1                       | K.NSLYLQM*NSLR.A | 1354.68 | 2 | 0.002 | 2.168 | 0.118    | 607.2     | 1   | 14/30 | 30    |

1 of 1 peptide matches reported, 0 removed due to filtering

DTA for scans: 19287468-1  
Precursor ion: 677.84  
Mass type: mono  
Mod's: (M\* +15.99492) C=161.01468

Ion series for charge: +1

| AA | A ions         | B ions        | B* ions | Bo ions | C ions | Y ions         | Y* ions | Yo ions | Z ions |
|----|----------------|---------------|---------|---------|--------|----------------|---------|---------|--------|
| N  | 87.06          | 115.05        |         |         |        |                |         |         |        |
| S  | 174.09         | 202.08        |         |         |        | 1240.64        |         |         |        |
| L  | 287.17         | <b>315.17</b> |         |         |        | 1153.60        |         |         |        |
| Y  | 450.23         | <b>478.23</b> |         |         |        | <b>1040.52</b> |         |         |        |
| L  | <b>563.32</b>  | <b>591.31</b> |         |         |        | <b>877.46</b>  |         |         |        |
| Q  | 691.38         | 719.37        |         |         |        | <b>764.37</b>  |         |         |        |
| M* | 838.41         | 866.41        |         |         |        | <b>636.31</b>  |         |         |        |
| N  | 952.46         | <b>980.45</b> |         |         |        | <b>489.28</b>  |         |         |        |
| S  | <b>1039.49</b> | 1067.48       |         |         |        | <b>375.24</b>  |         |         |        |
| L  | 1152.57        | 1180.57       |         |         |        | <b>288.20</b>  |         |         |        |
| R  |                |               |         |         |        | 175.12         |         |         |        |



#19287468-1 NL: 8.93E4



---

| Reference                          |                  |         |   | P     | Score | Coverage | Accession |     |       |       |
|------------------------------------|------------------|---------|---|-------|-------|----------|-----------|-----|-------|-------|
| Scan(s)                            | Sequence         | MH+     | z | P     | XC    | DeltaCn  | Sp        | RSp | Ions  | Count |
| IPI:IPI00914985.1 TREMBL:B6EDE2 Ta |                  |         |   | 0.1   | 8.1   | 0.0      |           | 0   |       |       |
| 19287468 - 1                       | K.NSLYLQM*NSLR.A | 1354.68 | 2 | 0.002 | 2.168 | 0.118    | 607.2     | 1   | 14/30 | 30    |

1 of 1 peptide matches reported, 0 removed due to filtering

DTA for scans: 19287468-1  
Precursor ion: 677.84  
Mass type: mono  
Mod's: (M\* +15.99492) C=161.01468

Ion series for charge: +1

| AA | A ions         | B ions        | B* ions | Bo ions | C ions | Y ions         | Y* ions | Yo ions | Z ions |
|----|----------------|---------------|---------|---------|--------|----------------|---------|---------|--------|
| N  | 87.06          | 115.05        |         |         |        |                |         |         |        |
| S  | 174.09         | 202.08        |         |         |        | 1240.64        |         |         |        |
| L  | 287.17         | <b>315.17</b> |         |         |        | 1153.60        |         |         |        |
| Y  | 450.23         | <b>478.23</b> |         |         |        | <b>1040.52</b> |         |         |        |
| L  | <b>563.32</b>  | <b>591.31</b> |         |         |        | <b>877.46</b>  |         |         |        |
| Q  | 691.38         | 719.37        |         |         |        | <b>764.37</b>  |         |         |        |
| M* | 838.41         | 866.41        |         |         |        | <b>636.31</b>  |         |         |        |
| N  | 952.46         | <b>980.45</b> |         |         |        | <b>489.28</b>  |         |         |        |
| S  | <b>1039.49</b> | 1067.48       |         |         |        | <b>375.24</b>  |         |         |        |
| L  | 1152.57        | 1180.57       |         |         |        | <b>288.20</b>  |         |         |        |
| R  |                |               |         |         |        | 175.12         |         |         |        |

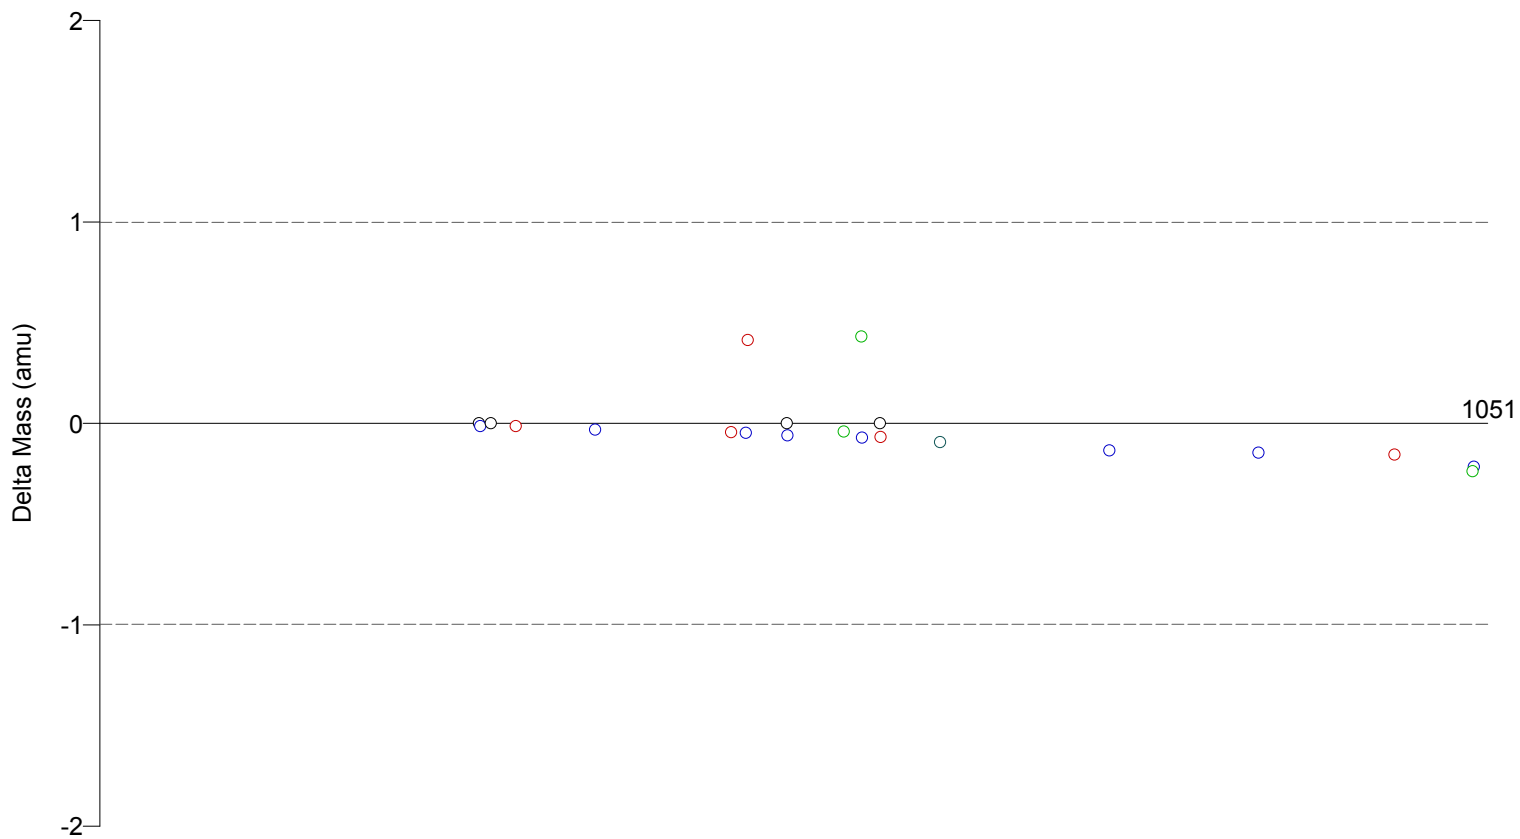

#19287468-1 NL: 8.93E4



---

| Reference                          |                  |         |   | P     | Score | Coverage | Accession |     |       |       |
|------------------------------------|------------------|---------|---|-------|-------|----------|-----------|-----|-------|-------|
| Scan(s)                            | Sequence         | MH+     | z | P     | XC    | DeltaCn  | Sp        | RSp | Ions  | Count |
| IPI:IPI00915820.1 TREMBL:A2NYQ9 Ta |                  |         |   | 0.1   | 8.1   | 0.0      |           | 0   |       |       |
| 19287468 - 1                       | K.NSLYLQM*NSLR.A | 1354.68 | 2 | 0.002 | 2.168 | 0.118    | 607.2     | 1   | 14/30 | 30    |

1 of 1 peptide matches reported, 0 removed due to filtering



DTA for scans: 19287468-1  
Precursor ion: 677.84  
Mass type: mono  
Mod's: (M\* +15.99492) C=161.01468

Ion series for charge: +1

| AA | A ions         | B ions        | B* ions | Bo ions | C ions | Y ions         | Y* ions | Yo ions | Z ions |
|----|----------------|---------------|---------|---------|--------|----------------|---------|---------|--------|
| N  | 87.06          | 115.05        |         |         |        |                |         |         |        |
| S  | 174.09         | 202.08        |         |         |        | 1240.64        |         |         |        |
| L  | 287.17         | <b>315.17</b> |         |         |        | 1153.60        |         |         |        |
| Y  | 450.23         | <b>478.23</b> |         |         |        | <b>1040.52</b> |         |         |        |
| L  | <b>563.32</b>  | <b>591.31</b> |         |         |        | <b>877.46</b>  |         |         |        |
| Q  | 691.38         | 719.37        |         |         |        | <b>764.37</b>  |         |         |        |
| M* | 838.41         | 866.41        |         |         |        | <b>636.31</b>  |         |         |        |
| N  | 952.46         | <b>980.45</b> |         |         |        | <b>489.28</b>  |         |         |        |
| S  | <b>1039.49</b> | 1067.48       |         |         |        | <b>375.24</b>  |         |         |        |
| L  | 1152.57        | 1180.57       |         |         |        | <b>288.20</b>  |         |         |        |
| R  |                |               |         |         |        | 175.12         |         |         |        |



#19287468-1 NL: 8.93E4



---

| Reference                          |                  |         |   | P     | Score | Coverage | Accession |     |       |       |
|------------------------------------|------------------|---------|---|-------|-------|----------|-----------|-----|-------|-------|
| Scan(s)                            | Sequence         | MH+     | z | P     | XC    | DeltaCn  | Sp        | RSp | Ions  | Count |
| IPI:IPI00936563.1 ENSEMBL:ENSP0000 |                  |         |   | 0.1   | 8.1   | 0.0      | 0         |     |       |       |
| 19287468 - 1                       | K.NSLYLQM*NSLR.A | 1354.68 | 2 | 0.002 | 2.168 | 0.118    | 607.2     | 1   | 14/30 | 30    |

1 of 1 peptide matches reported, 0 removed due to filtering

DTA for scans: 19287468-1  
Precursor ion: 677.84  
Mass type: mono  
Mod's: (M\* +15.99492) C=161.01468

Ion series for charge: +1

| AA | A ions         | B ions        | B* ions | Bo ions | C ions | Y ions         | Y* ions | Yo ions | Z ions |
|----|----------------|---------------|---------|---------|--------|----------------|---------|---------|--------|
| N  | 87.06          | 115.05        |         |         |        |                |         |         |        |
| S  | 174.09         | 202.08        |         |         |        | 1240.64        |         |         |        |
| L  | 287.17         | <b>315.17</b> |         |         |        | 1153.60        |         |         |        |
| Y  | 450.23         | <b>478.23</b> |         |         |        | <b>1040.52</b> |         |         |        |
| L  | <b>563.32</b>  | <b>591.31</b> |         |         |        | <b>877.46</b>  |         |         |        |
| Q  | 691.38         | 719.37        |         |         |        | <b>764.37</b>  |         |         |        |
| M* | 838.41         | 866.41        |         |         |        | <b>636.31</b>  |         |         |        |
| N  | 952.46         | <b>980.45</b> |         |         |        | <b>489.28</b>  |         |         |        |
| S  | <b>1039.49</b> | 1067.48       |         |         |        | <b>375.24</b>  |         |         |        |
| L  | 1152.57        | 1180.57       |         |         |        | <b>288.20</b>  |         |         |        |
| R  |                |               |         |         |        | 175.12         |         |         |        |



#19287468-1 NL: 8.93E4



---

| Reference                          |                  |         |   | P     | Score | Coverage | Accession |     |       |       |
|------------------------------------|------------------|---------|---|-------|-------|----------|-----------|-----|-------|-------|
| Scan(s)                            | Sequence         | MH+     | z | P     | XC    | DeltaCn  | Sp        | RSp | Ions  | Count |
| IPI:IPI00936661.1 REFSEQ:XP_001718 |                  |         |   | 0.1   | 8.1   | 0.0      |           | 0   |       |       |
| 19287468 - 1                       | K.NSLYLQM*NSLR.A | 1354.68 | 2 | 0.002 | 2.168 | 0.118    | 607.2     | 1   | 14/30 | 30    |

1 of 1 peptide matches reported, 0 removed due to filtering

DTA for scans: 19287468-1  
Precursor ion: 677.84  
Mass type: mono  
Mod's: (M\* +15.99492) C=161.01468

Ion series for charge: +1

| AA | A ions         | B ions        | B* ions | Bo ions | C ions | Y ions         | Y* ions | Yo ions | Z ions |
|----|----------------|---------------|---------|---------|--------|----------------|---------|---------|--------|
| N  | 87.06          | 115.05        |         |         |        |                |         |         |        |
| S  | 174.09         | 202.08        |         |         |        | 1240.64        |         |         |        |
| L  | 287.17         | <b>315.17</b> |         |         |        | 1153.60        |         |         |        |
| Y  | 450.23         | <b>478.23</b> |         |         |        | <b>1040.52</b> |         |         |        |
| L  | <b>563.32</b>  | <b>591.31</b> |         |         |        | <b>877.46</b>  |         |         |        |
| Q  | 691.38         | 719.37        |         |         |        | <b>764.37</b>  |         |         |        |
| M* | 838.41         | 866.41        |         |         |        | <b>636.31</b>  |         |         |        |
| N  | 952.46         | <b>980.45</b> |         |         |        | <b>489.28</b>  |         |         |        |
| S  | <b>1039.49</b> | 1067.48       |         |         |        | <b>375.24</b>  |         |         |        |
| L  | 1152.57        | 1180.57       |         |         |        | <b>288.20</b>  |         |         |        |
| R  |                |               |         |         |        | 175.12         |         |         |        |



#19287468-1 NL: 8.93E4





---

| Reference                          |                  |         |   | P     | Score | Coverage | Accession |     |       |       |
|------------------------------------|------------------|---------|---|-------|-------|----------|-----------|-----|-------|-------|
| Scan(s)                            | Sequence         | MH+     | z | P     | XC    | DeltaCn  | Sp        | RSp | Ions  | Count |
| IPI:IPI00937119.1 REFSEQ:XP_002344 |                  |         |   | 0.1   | 8.1   | 0.0      | 0         |     |       |       |
| 19287468 - 1                       | K.NSLYLQM*NSLR.A | 1354.68 | 2 | 0.002 | 2.168 | 0.118    | 607.2     | 1   | 14/30 | 30    |

1 of 1 peptide matches reported, 0 removed due to filtering

DTA for scans: 19287468-1  
Precursor ion: 677.84  
Mass type: mono  
Mod's: (M\* +15.99492) C=161.01468

Ion series for charge: +1

| AA | A ions         | B ions        | B* ions | Bo ions | C ions | Y ions         | Y* ions | Yo ions | Z ions |
|----|----------------|---------------|---------|---------|--------|----------------|---------|---------|--------|
| N  | 87.06          | 115.05        |         |         |        |                |         |         |        |
| S  | 174.09         | 202.08        |         |         |        | 1240.64        |         |         |        |
| L  | 287.17         | <b>315.17</b> |         |         |        | 1153.60        |         |         |        |
| Y  | 450.23         | <b>478.23</b> |         |         |        | <b>1040.52</b> |         |         |        |
| L  | <b>563.32</b>  | <b>591.31</b> |         |         |        | <b>877.46</b>  |         |         |        |
| Q  | 691.38         | 719.37        |         |         |        | <b>764.37</b>  |         |         |        |
| M* | 838.41         | 866.41        |         |         |        | <b>636.31</b>  |         |         |        |
| N  | 952.46         | <b>980.45</b> |         |         |        | <b>489.28</b>  |         |         |        |
| S  | <b>1039.49</b> | 1067.48       |         |         |        | <b>375.24</b>  |         |         |        |
| L  | 1152.57        | 1180.57       |         |         |        | <b>288.20</b>  |         |         |        |
| R  |                |               |         |         |        | 175.12         |         |         |        |



#19287468-1 NL: 8.93E4



---

| Reference                          |                  |         |   | P     | Score | Coverage | Accession |     |       |       |
|------------------------------------|------------------|---------|---|-------|-------|----------|-----------|-----|-------|-------|
| Scan(s)                            | Sequence         | MH+     | z | P     | XC    | DeltaCn  | Sp        | RSp | Ions  | Count |
| IPI:IPI00937583.1 TREMBL:A0N5G2 EN |                  |         |   | 0.1   | 8.1   | 0.0      |           | 0   |       |       |
| 19287468 - 1                       | K.NSLYLQM*NSLR.A | 1354.68 | 2 | 0.002 | 2.168 | 0.118    | 607.2     | 1   | 14/30 | 30    |

1 of 1 peptide matches reported, 0 removed due to filtering

DTA for scans: 19287468-1  
Precursor ion: 677.84  
Mass type: mono  
Mod's: (M\* +15.99492) C=161.01468

Ion series for charge: +1

| AA | A ions         | B ions        | B* ions | Bo ions | C ions | Y ions         | Y* ions | Yo ions | Z ions |
|----|----------------|---------------|---------|---------|--------|----------------|---------|---------|--------|
| N  | 87.06          | 115.05        |         |         |        |                |         |         |        |
| S  | 174.09         | 202.08        |         |         |        | 1240.64        |         |         |        |
| L  | 287.17         | <b>315.17</b> |         |         |        | 1153.60        |         |         |        |
| Y  | 450.23         | <b>478.23</b> |         |         |        | <b>1040.52</b> |         |         |        |
| L  | <b>563.32</b>  | <b>591.31</b> |         |         |        | <b>877.46</b>  |         |         |        |
| Q  | 691.38         | 719.37        |         |         |        | <b>764.37</b>  |         |         |        |
| M* | 838.41         | 866.41        |         |         |        | <b>636.31</b>  |         |         |        |
| N  | 952.46         | <b>980.45</b> |         |         |        | <b>489.28</b>  |         |         |        |
| S  | <b>1039.49</b> | 1067.48       |         |         |        | <b>375.24</b>  |         |         |        |
| L  | 1152.57        | 1180.57       |         |         |        | <b>288.20</b>  |         |         |        |
| R  |                |               |         |         |        | 175.12         |         |         |        |



#19287468-1 NL: 8.93E4



---

| Reference                          |                  |         |   | P     | Score | Coverage | Accession |     |       |       |
|------------------------------------|------------------|---------|---|-------|-------|----------|-----------|-----|-------|-------|
| Scan(s)                            | Sequence         | MH+     | z | P     | XC    | DeltaCn  | Sp        | RSp | Ions  | Count |
| IPI:IPI00937669.1 REFSEQ:XP_002343 |                  |         |   | 0.1   | 8.1   | 0.0      |           | 0   |       |       |
| 19287468 - 1                       | K.NSLYLQM*NSLR.A | 1354.68 | 2 | 0.002 | 2.168 | 0.118    | 607.2     | 1   | 14/30 | 30    |

1 of 1 peptide matches reported, 0 removed due to filtering

DTA for scans: 19287468-1  
Precursor ion: 677.84  
Mass type: mono  
Mod's: (M\* +15.99492) C=161.01468

Ion series for charge: +1

| AA | A ions         | B ions        | B* ions | Bo ions | C ions | Y ions         | Y* ions | Yo ions | Z ions |
|----|----------------|---------------|---------|---------|--------|----------------|---------|---------|--------|
| N  | 87.06          | 115.05        |         |         |        |                |         |         |        |
| S  | 174.09         | 202.08        |         |         |        | 1240.64        |         |         |        |
| L  | 287.17         | <b>315.17</b> |         |         |        | 1153.60        |         |         |        |
| Y  | 450.23         | <b>478.23</b> |         |         |        | <b>1040.52</b> |         |         |        |
| L  | <b>563.32</b>  | <b>591.31</b> |         |         |        | <b>877.46</b>  |         |         |        |
| Q  | 691.38         | 719.37        |         |         |        | <b>764.37</b>  |         |         |        |
| M* | 838.41         | 866.41        |         |         |        | <b>636.31</b>  |         |         |        |
| N  | 952.46         | <b>980.45</b> |         |         |        | <b>489.28</b>  |         |         |        |
| S  | <b>1039.49</b> | 1067.48       |         |         |        | <b>375.24</b>  |         |         |        |
| L  | 1152.57        | 1180.57       |         |         |        | <b>288.20</b>  |         |         |        |
| R  |                |               |         |         |        | 175.12         |         |         |        |





#19287468-1 NL: 8.93E4



---

| Reference                          |                  |         |   | P     | Score | Coverage | Accession |     |       |       |
|------------------------------------|------------------|---------|---|-------|-------|----------|-----------|-----|-------|-------|
| Scan(s)                            | Sequence         | MH+     | z | P     | XC    | DeltaCn  | Sp        | RSp | Ions  | Count |
| IPI:IPI00937796.1 TREMBL:A2J1N1;Q0 |                  |         |   | 0.1   | 8.1   | 0.0      |           | 0   |       |       |
| 19287468 - 1                       | K.NSLYLQM*NSLR.A | 1354.68 | 2 | 0.002 | 2.168 | 0.118    | 607.2     | 1   | 14/30 | 30    |

1 of 1 peptide matches reported, 0 removed due to filtering

DTA for scans: 19287468-1  
Precursor ion: 677.84  
Mass type: mono  
Mod's: (M\* +15.99492) C=161.01468

Ion series for charge: +1

| AA | A ions         | B ions        | B* ions | Bo ions | C ions | Y ions         | Y* ions | Yo ions | Z ions |
|----|----------------|---------------|---------|---------|--------|----------------|---------|---------|--------|
| N  | 87.06          | 115.05        |         |         |        |                |         |         |        |
| S  | 174.09         | 202.08        |         |         |        | 1240.64        |         |         |        |
| L  | 287.17         | <b>315.17</b> |         |         |        | 1153.60        |         |         |        |
| Y  | 450.23         | <b>478.23</b> |         |         |        | <b>1040.52</b> |         |         |        |
| L  | <b>563.32</b>  | <b>591.31</b> |         |         |        | <b>877.46</b>  |         |         |        |
| Q  | 691.38         | 719.37        |         |         |        | <b>764.37</b>  |         |         |        |
| M* | 838.41         | 866.41        |         |         |        | <b>636.31</b>  |         |         |        |
| N  | 952.46         | <b>980.45</b> |         |         |        | <b>489.28</b>  |         |         |        |
| S  | <b>1039.49</b> | 1067.48       |         |         |        | <b>375.24</b>  |         |         |        |
| L  | 1152.57        | 1180.57       |         |         |        | <b>288.20</b>  |         |         |        |
| R  |                |               |         |         |        | 175.12         |         |         |        |



#19287468-1 NL: 8.93E4



---

| Reference                          |                  |         |   | P     | Score | Coverage | Accession |     |       |       |
|------------------------------------|------------------|---------|---|-------|-------|----------|-----------|-----|-------|-------|
| Scan(s)                            | Sequence         | MH+     | z | P     | XC    | DeltaCn  | Sp        | RSp | Ions  | Count |
| IPI:IPI00937964.1 REFSEQ:XP_002346 |                  |         |   | 0.1   | 8.1   | 0.0      | 0         |     |       |       |
| 19287468 - 1                       | K.NSLYLQM*NSLR.A | 1354.68 | 2 | 0.002 | 2.168 | 0.118    | 607.2     | 1   | 14/30 | 30    |

1 of 1 peptide matches reported, 0 removed due to filtering

DTA for scans: 19287468-1  
Precursor ion: 677.84  
Mass type: mono  
Mod's: (M\* +15.99492) C=161.01468

Ion series for charge: +1

| AA | A ions         | B ions        | B* ions | Bo ions | C ions | Y ions         | Y* ions | Yo ions | Z ions |
|----|----------------|---------------|---------|---------|--------|----------------|---------|---------|--------|
| N  | 87.06          | 115.05        |         |         |        |                |         |         |        |
| S  | 174.09         | 202.08        |         |         |        | 1240.64        |         |         |        |
| L  | 287.17         | <b>315.17</b> |         |         |        | 1153.60        |         |         |        |
| Y  | 450.23         | <b>478.23</b> |         |         |        | <b>1040.52</b> |         |         |        |
| L  | <b>563.32</b>  | <b>591.31</b> |         |         |        | <b>877.46</b>  |         |         |        |
| Q  | 691.38         | 719.37        |         |         |        | <b>764.37</b>  |         |         |        |
| M* | 838.41         | 866.41        |         |         |        | <b>636.31</b>  |         |         |        |
| N  | 952.46         | <b>980.45</b> |         |         |        | <b>489.28</b>  |         |         |        |
| S  | <b>1039.49</b> | 1067.48       |         |         |        | <b>375.24</b>  |         |         |        |
| L  | 1152.57        | 1180.57       |         |         |        | <b>288.20</b>  |         |         |        |
| R  |                |               |         |         |        | 175.12         |         |         |        |



#19287468-1 NL: 8.93E4



---

| Reference                                                      |              |        |   | P     | Score | Coverage | Accession |     |       |       |
|----------------------------------------------------------------|--------------|--------|---|-------|-------|----------|-----------|-----|-------|-------|
| Scan(s)                                                        | Sequence     | MH+    | z | P     | XC    | DeltaCn  | Sp        | RSp | Ions  | Count |
| IPI:IPI00550991.3 SWISS-PROT:P01011-2 TREMBL:B3KS79 ENSEMBL:EN |              |        |   | 0.3   | 10.1  | 0.0      | 0         |     |       |       |
| 19287468 - 1                                                   | K.KLINDYVK.N | 992.58 | 2 | 0.004 | 2.401 | 0.272    | 505.2     | 1   | 12/21 | 2     |

1 of 1 peptide matches reported, 0 removed due to filtering



DTA for scans: 19287468-1  
Precursor ion: 496.79  
Mass type: mono  
Mod's: (M\* +15.99492) C=161.01468

Ion series for charge: +1

| AA | A ions | B ions        | B* ions | Bo ions | C ions | Y ions        | Y* ions | Yo ions | Z ions |
|----|--------|---------------|---------|---------|--------|---------------|---------|---------|--------|
| K  | 101.11 | 129.10        |         |         |        |               |         |         |        |
| L  | 214.19 | <b>242.19</b> |         |         |        | <b>864.48</b> |         |         |        |
| I  | 327.28 | <b>355.27</b> |         |         |        | <b>751.40</b> |         |         |        |
| N  | 441.32 | 469.31        |         |         |        | <b>638.31</b> |         |         |        |
| D  | 556.35 | <b>584.34</b> |         |         |        | <b>524.27</b> |         |         |        |
| Y  | 719.41 | <b>747.40</b> |         |         |        | <b>409.24</b> |         |         |        |
| V  | 818.48 | <b>846.47</b> |         |         |        | <b>246.18</b> |         |         |        |
| K  |        |               |         |         |        | <b>147.11</b> |         |         |        |

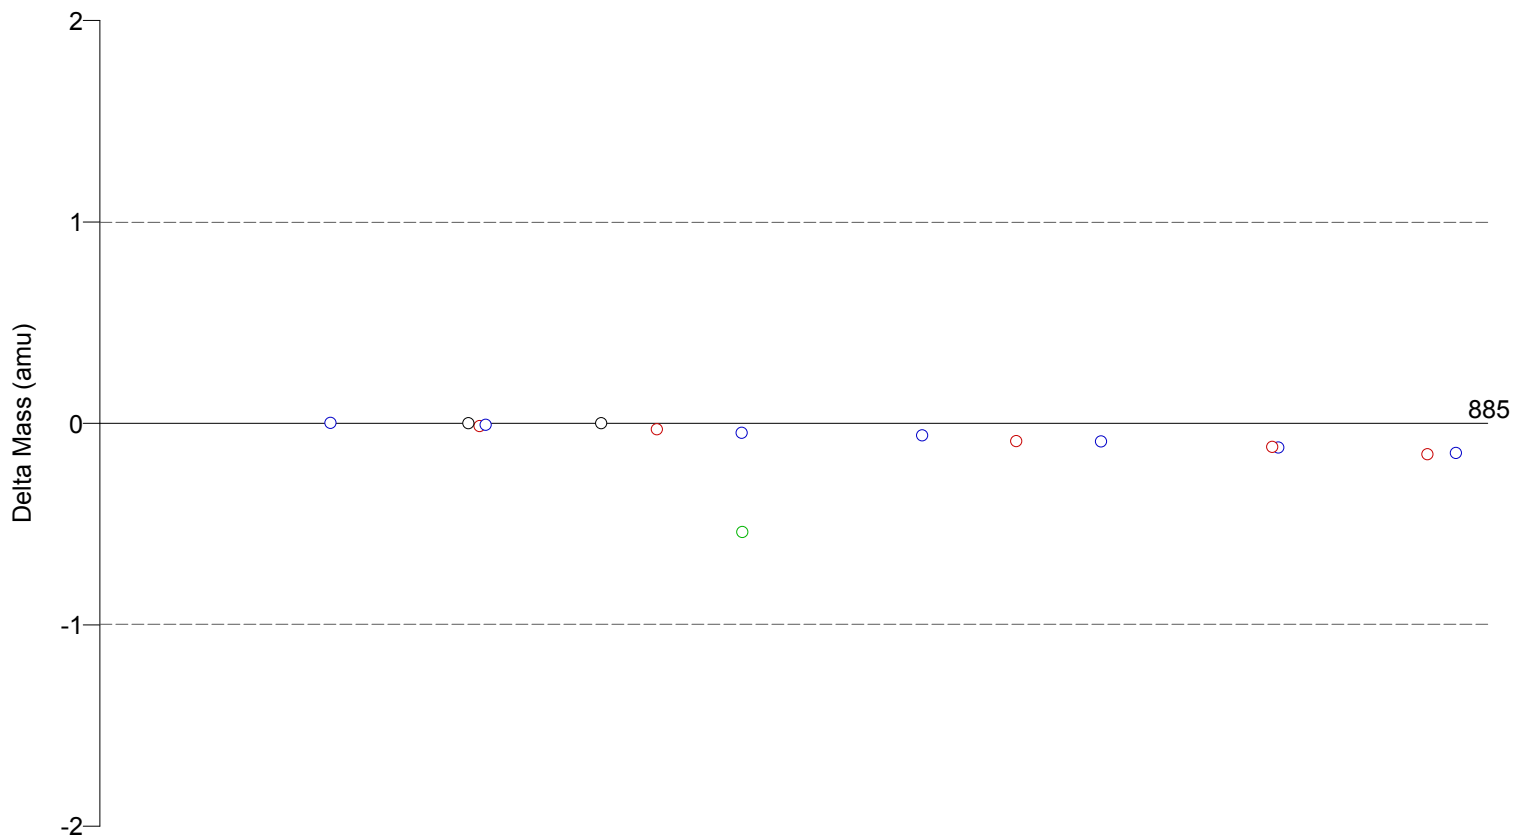

#19287468-1 NL: 1.35E5

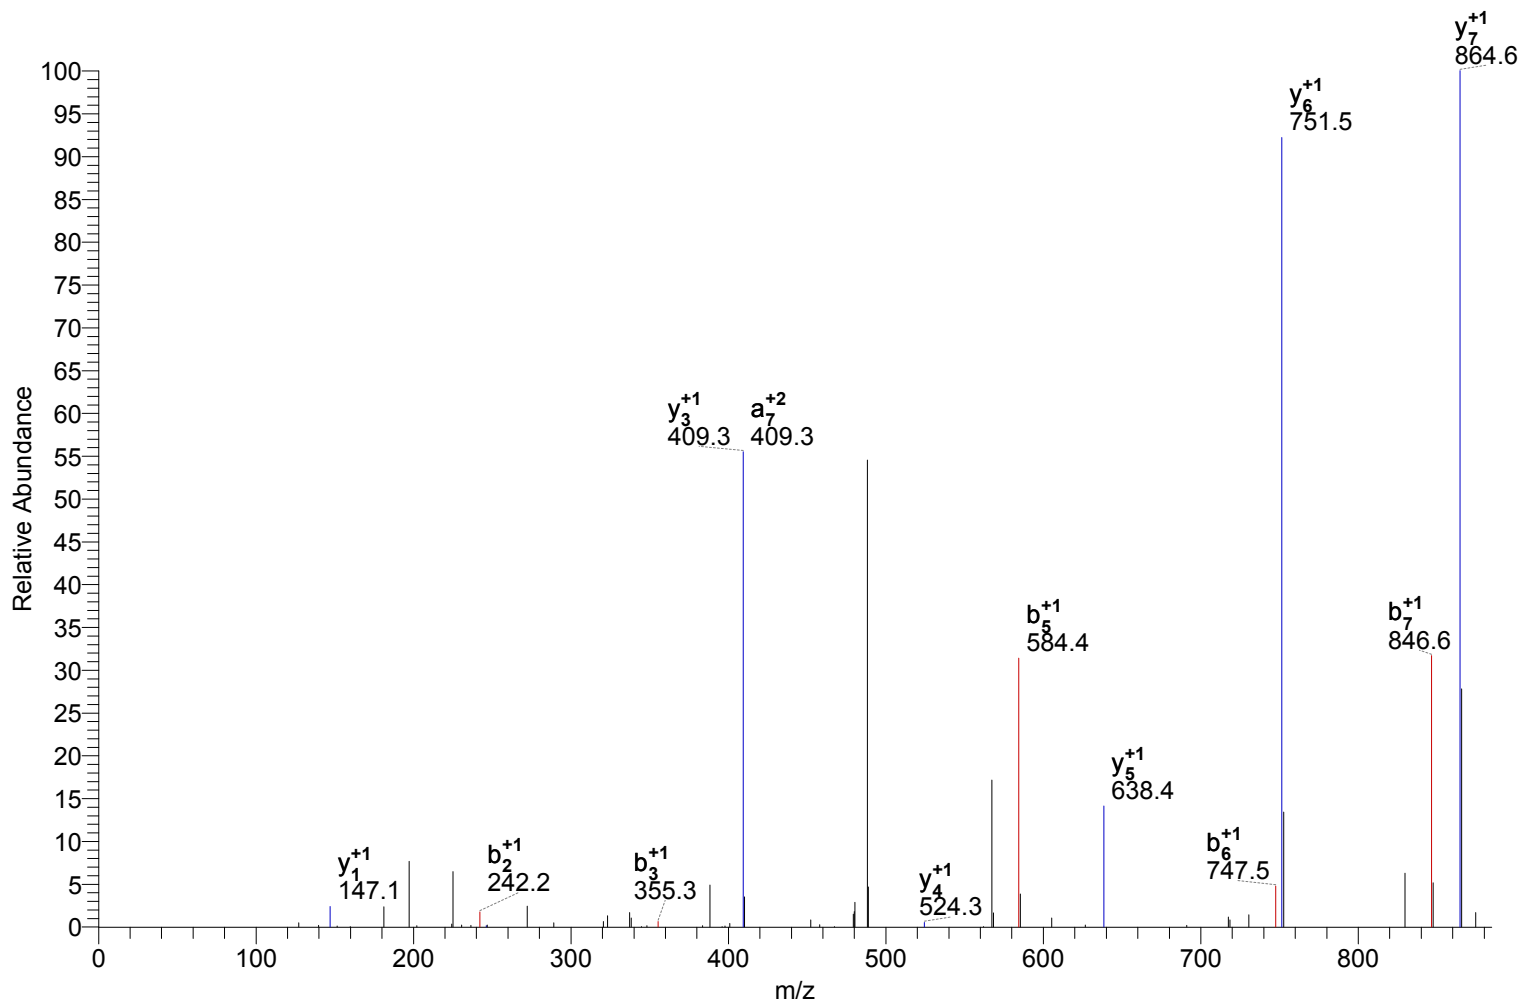

---

| Reference                          |              |        | P | Score | Coverage | Accession |       |     |       |       |
|------------------------------------|--------------|--------|---|-------|----------|-----------|-------|-----|-------|-------|
| Scan(s)                            | Sequence     | MH+    | z | P     | XC       | DeltaCn   | Sp    | RSp | Ions  | Count |
| IPI:IPI00847635.1 SWISS-PROT:P0101 |              |        |   | 0.3   | 10.1     | 0.0       | 0     |     |       |       |
| 19287468 - 1                       | K.KLINDYVK.N | 992.58 | 2 | 0.004 | 2.401    | 0.272     | 505.2 | 1   | 12/21 | 2     |

1 of 1 peptide matches reported, 0 removed due to filtering

DTA for scans: 19287468-1  
Precursor ion: 496.79  
Mass type: mono  
Mod's: (M\* +15.99492) C=161.01468

Ion series for charge: +1

| AA | A ions | B ions        | B* ions | Bo ions | C ions | Y ions        | Y* ions | Yo ions | Z ions |
|----|--------|---------------|---------|---------|--------|---------------|---------|---------|--------|
| K  | 101.11 | 129.10        |         |         |        |               |         |         |        |
| L  | 214.19 | <b>242.19</b> |         |         |        | <b>864.48</b> |         |         |        |
| I  | 327.28 | <b>355.27</b> |         |         |        | <b>751.40</b> |         |         |        |
| N  | 441.32 | 469.31        |         |         |        | <b>638.31</b> |         |         |        |
| D  | 556.35 | <b>584.34</b> |         |         |        | <b>524.27</b> |         |         |        |
| Y  | 719.41 | <b>747.40</b> |         |         |        | <b>409.24</b> |         |         |        |
| V  | 818.48 | <b>846.47</b> |         |         |        | <b>246.18</b> |         |         |        |
| K  |        |               |         |         |        | <b>147.11</b> |         |         |        |



#19287468-1 NL: 1.35E5



---

| Reference                          |              |        |   | P     | Score | Coverage | Accession |     |       |       |
|------------------------------------|--------------|--------|---|-------|-------|----------|-----------|-----|-------|-------|
| Scan(s)                            | Sequence     | MH+    | z | P     | XC    | DeltaCn  | Sp        | RSp | Ions  | Count |
| IPI:IPI00935915.1 ENSEMBL:ENSP0000 |              |        |   | 0.3   | 10.1  | 0.0      | 0         |     |       |       |
| 19287468 - 1                       | K.KLINDYVK.N | 992.58 | 2 | 0.004 | 2.401 | 0.272    | 505.2     | 1   | 12/21 | 2     |

1 of 1 peptide matches reported, 0 removed due to filtering

DTA for scans: 19287468-1  
Precursor ion: 496.79  
Mass type: mono  
Mod's: (M\* +15.99492) C=161.01468

Ion series for charge: +1

| AA | A ions | B ions        | B* ions | Bo ions | C ions | Y ions        | Y* ions | Yo ions | Z ions |
|----|--------|---------------|---------|---------|--------|---------------|---------|---------|--------|
| K  | 101.11 | 129.10        |         |         |        |               |         |         |        |
| L  | 214.19 | <b>242.19</b> |         |         |        | <b>864.48</b> |         |         |        |
| I  | 327.28 | <b>355.27</b> |         |         |        | <b>751.40</b> |         |         |        |
| N  | 441.32 | 469.31        |         |         |        | <b>638.31</b> |         |         |        |
| D  | 556.35 | <b>584.34</b> |         |         |        | <b>524.27</b> |         |         |        |
| Y  | 719.41 | <b>747.40</b> |         |         |        | <b>409.24</b> |         |         |        |
| V  | 818.48 | <b>846.47</b> |         |         |        | <b>246.18</b> |         |         |        |
| K  |        |               |         |         |        | <b>147.11</b> |         |         |        |

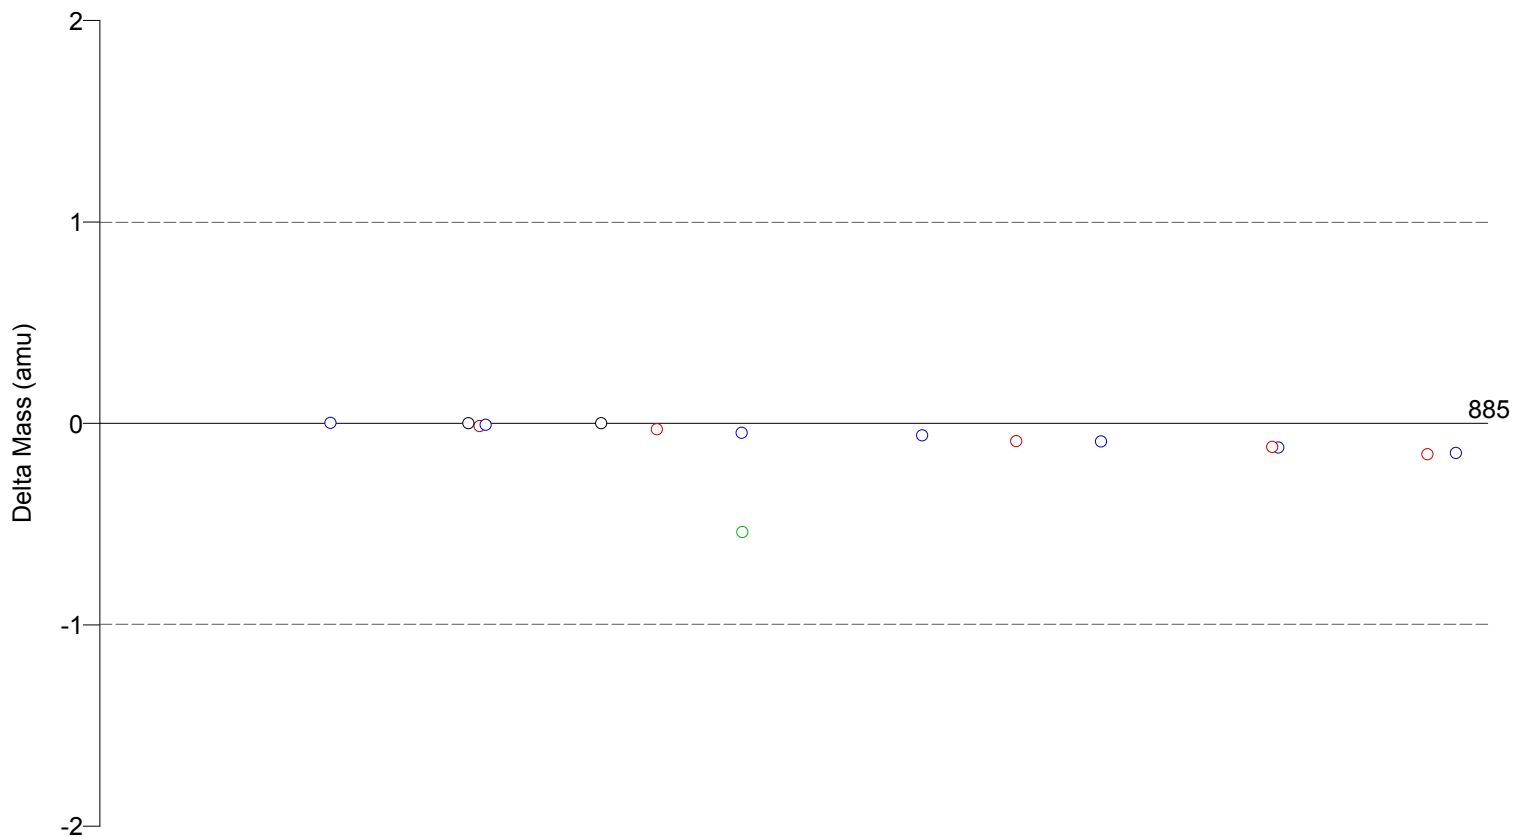

#19287468-1 NL: 1.35E5

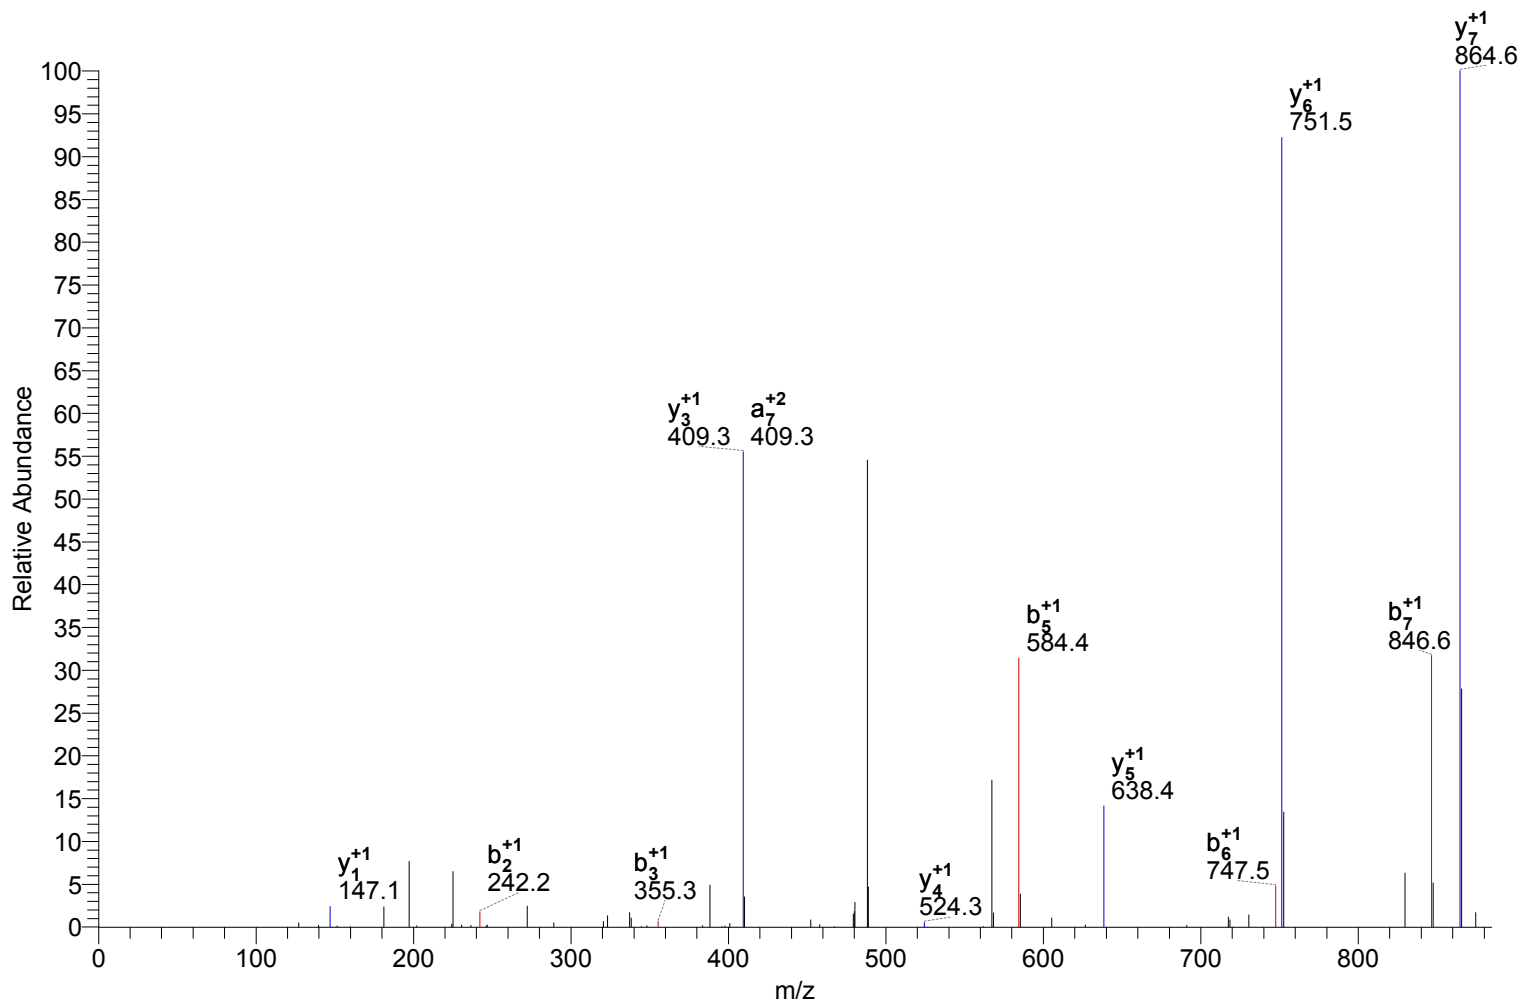



---

| Reference                                                      |               |         |   | P     | Score | Coverage | Accession |     |       |       |
|----------------------------------------------------------------|---------------|---------|---|-------|-------|----------|-----------|-----|-------|-------|
| Scan(s)                                                        | Sequence      | MH+     | z | P     | XC    | DeltaCn  | Sp        | RSp | Ions  | Count |
| IPI:IPI00019568.1 SWISS-PROT:P00734 TREMBL:B4DDT3;Q15253;Q69EZ |               |         |   | 0.3   | 10.2  | 0.0      |           | 0   |       |       |
| 19287468 - 1                                                   | R.SGIECQLWR.S | 1149.54 | 2 | 0.004 | 3.490 | 0.339    | 1292.4    | 1   | 17/24 | 1     |

1 of 1 peptide matches reported, 0 removed due to filtering

DTA for scans: 19287468-1  
Precursor ion: 575.27  
Mass type: mono  
Mod's: (M\* +15.99492) C=161.01468

Ion series for charge: +1

| AA | A ions        | B ions        | B* ions | Bo ions | C ions | Y ions         | Y* ions | Yo ions | Z ions |
|----|---------------|---------------|---------|---------|--------|----------------|---------|---------|--------|
| S  | 60.04         | 88.04         |         |         |        |                |         |         |        |
| G  | 117.07        | 145.06        |         |         |        | 1062.50        |         |         |        |
| I  | <b>230.15</b> | <b>258.14</b> |         |         |        | <b>1005.48</b> |         |         |        |
| E  | <b>359.19</b> | <b>387.19</b> |         |         |        | <b>892.40</b>  |         |         |        |
| C  | 520.21        | <b>548.20</b> |         |         |        | <b>763.36</b>  |         |         |        |
| Q  | 648.27        | <b>676.26</b> |         |         |        | <b>602.34</b>  |         |         |        |
| L  | <b>761.35</b> | <b>789.34</b> |         |         |        | <b>474.28</b>  |         |         |        |
| W  | <b>947.43</b> | <b>975.42</b> |         |         |        | <b>361.20</b>  |         |         |        |
| R  |               |               |         |         |        | <b>175.12</b>  |         |         |        |

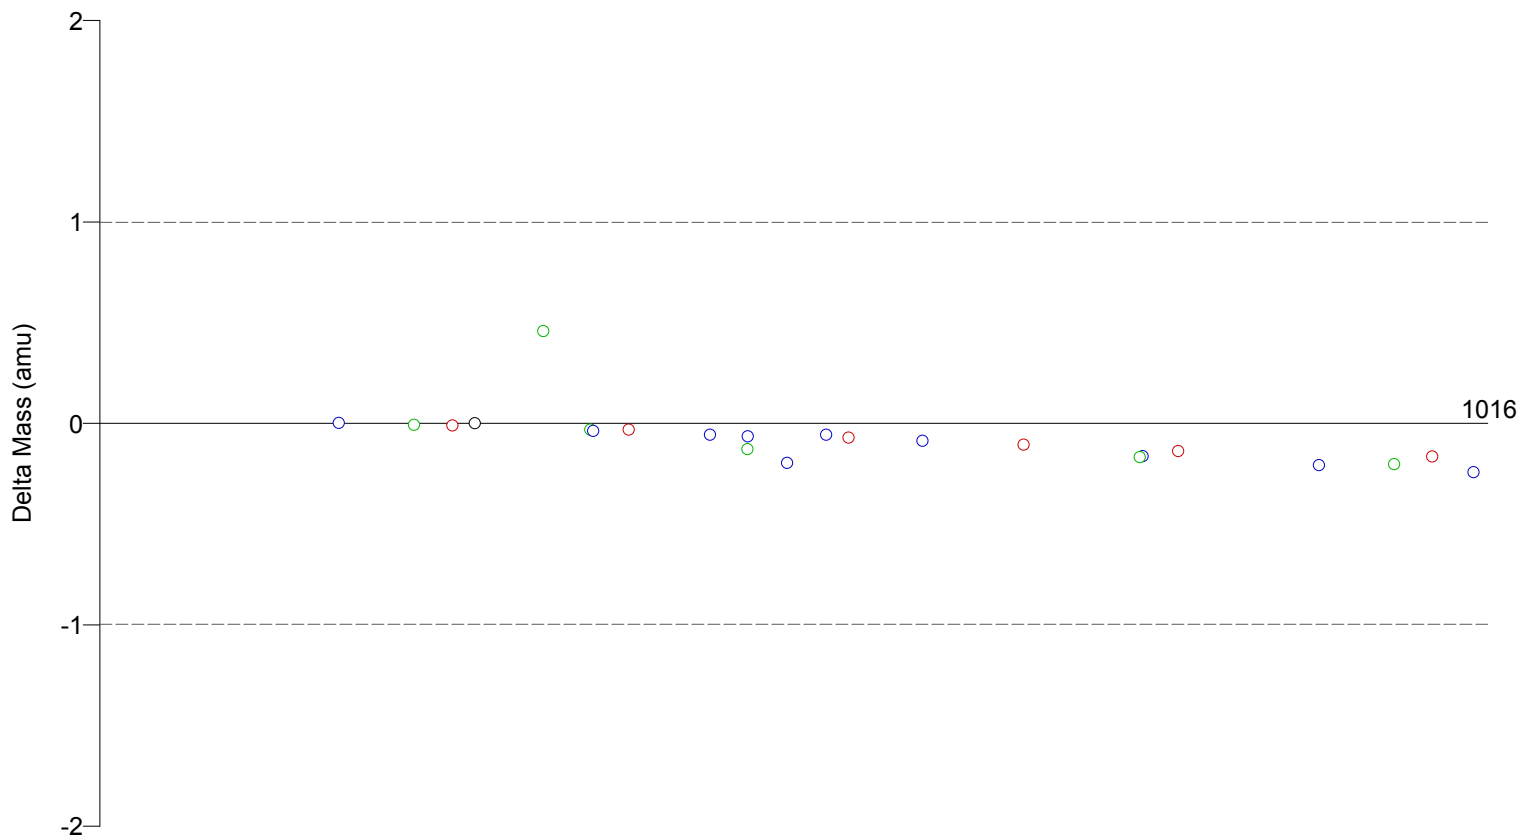

#19287468-1 NL: 1.42E5

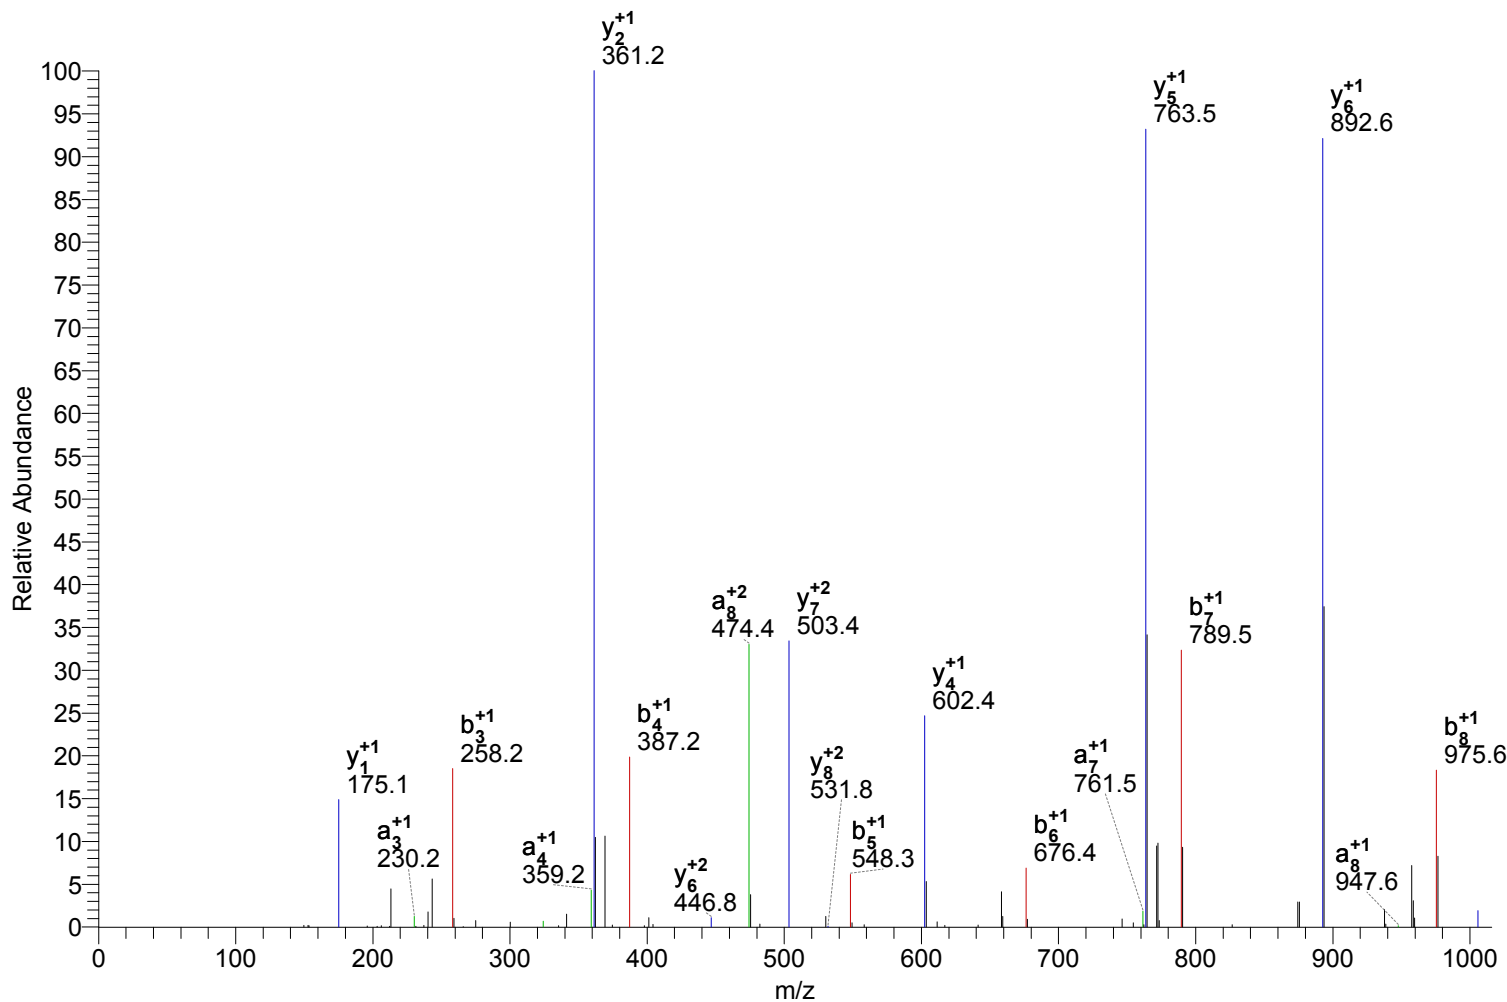

---

| Reference                          |               |         |   | P     | Score | Coverage | Accession |     |       |       |
|------------------------------------|---------------|---------|---|-------|-------|----------|-----------|-----|-------|-------|
| Scan(s)                            | Sequence      | MH+     | z | P     | XC    | DeltaCn  | Sp        | RSp | Ions  | Count |
| IPI:IPI00877967.1 VEGA:OTTHUMP0000 |               |         |   | 0.3   | 10.2  | 0.0      |           | 0   |       |       |
| 19287468 - 1                       | R.SGIECQLWR.S | 1149.54 | 2 | 0.004 | 3.490 | 0.339    | 1292.4    | 1   | 17/24 | 1     |

1 of 1 peptide matches reported, 0 removed due to filtering

DTA for scans: 19287468-1  
Precursor ion: 575.27  
Mass type: mono  
Mod's: (M\* +15.99492) C=161.01468

Ion series for charge: +1

| AA | A ions        | B ions        | B* ions | Bo ions | C ions | Y ions         | Y* ions | Yo ions | Z ions |
|----|---------------|---------------|---------|---------|--------|----------------|---------|---------|--------|
| S  | 60.04         | 88.04         |         |         |        |                |         |         |        |
| G  | 117.07        | 145.06        |         |         |        | 1062.50        |         |         |        |
| I  | <b>230.15</b> | <b>258.14</b> |         |         |        | <b>1005.48</b> |         |         |        |
| E  | <b>359.19</b> | <b>387.19</b> |         |         |        | <b>892.40</b>  |         |         |        |
| C  | 520.21        | <b>548.20</b> |         |         |        | <b>763.36</b>  |         |         |        |
| Q  | 648.27        | <b>676.26</b> |         |         |        | <b>602.34</b>  |         |         |        |
| L  | <b>761.35</b> | <b>789.34</b> |         |         |        | <b>474.28</b>  |         |         |        |
| W  | <b>947.43</b> | <b>975.42</b> |         |         |        | <b>361.20</b>  |         |         |        |
| R  |               |               |         |         |        | <b>175.12</b>  |         |         |        |



#19287468-1 NL: 1.42E5



---

| Reference                                                      |             |        |   | P     | Score | Coverage | Accession |     |       |       |
|----------------------------------------------------------------|-------------|--------|---|-------|-------|----------|-----------|-----|-------|-------|
| Scan(s)                                                        | Sequence    | MH+    | z | P     | XC    | DeltaCn  | Sp        | RSp | Ions  | Count |
| IPI:IPI00006662.1 SWISS-PROT:P05090 TREMBL:B2R579 ENSEMBL:ENSP |             |        |   | 0.3   | 10.1  | 0.0      | 0         |     |       |       |
| 19287468 - 1                                                   | K.VLNQELR.A | 871.50 | 2 | 0.004 | 2.210 | 0.309    | 564.0     | 1   | 13/18 | 3     |

1 of 1 peptide matches reported, 0 removed due to filtering

DTA for scans: 19287468-1  
Precursor ion: 436.25  
Mass type: mono  
Mod's: (M\* +15.99492) C=161.01468

Ion series for charge: +1

| AA | A ions        | B ions        | B* ions | Bo ions | C ions | Y ions        | Y* ions | Yo ions | Z ions |
|----|---------------|---------------|---------|---------|--------|---------------|---------|---------|--------|
| V  | 72.08         | 100.08        |         |         |        |               |         |         |        |
| L  | <b>185.16</b> | <b>213.16</b> |         |         |        | <b>772.43</b> |         |         |        |
| N  | <b>299.21</b> | <b>327.20</b> |         |         |        | <b>659.35</b> |         |         |        |
| Q  | 427.27        | <b>455.26</b> |         |         |        | <b>545.30</b> |         |         |        |
| E  | 556.31        | <b>584.30</b> |         |         |        | <b>417.25</b> |         |         |        |
| L  | 669.39        | 697.39        |         |         |        | <b>288.20</b> |         |         |        |
| R  |               |               |         |         |        | <b>175.12</b> |         |         |        |



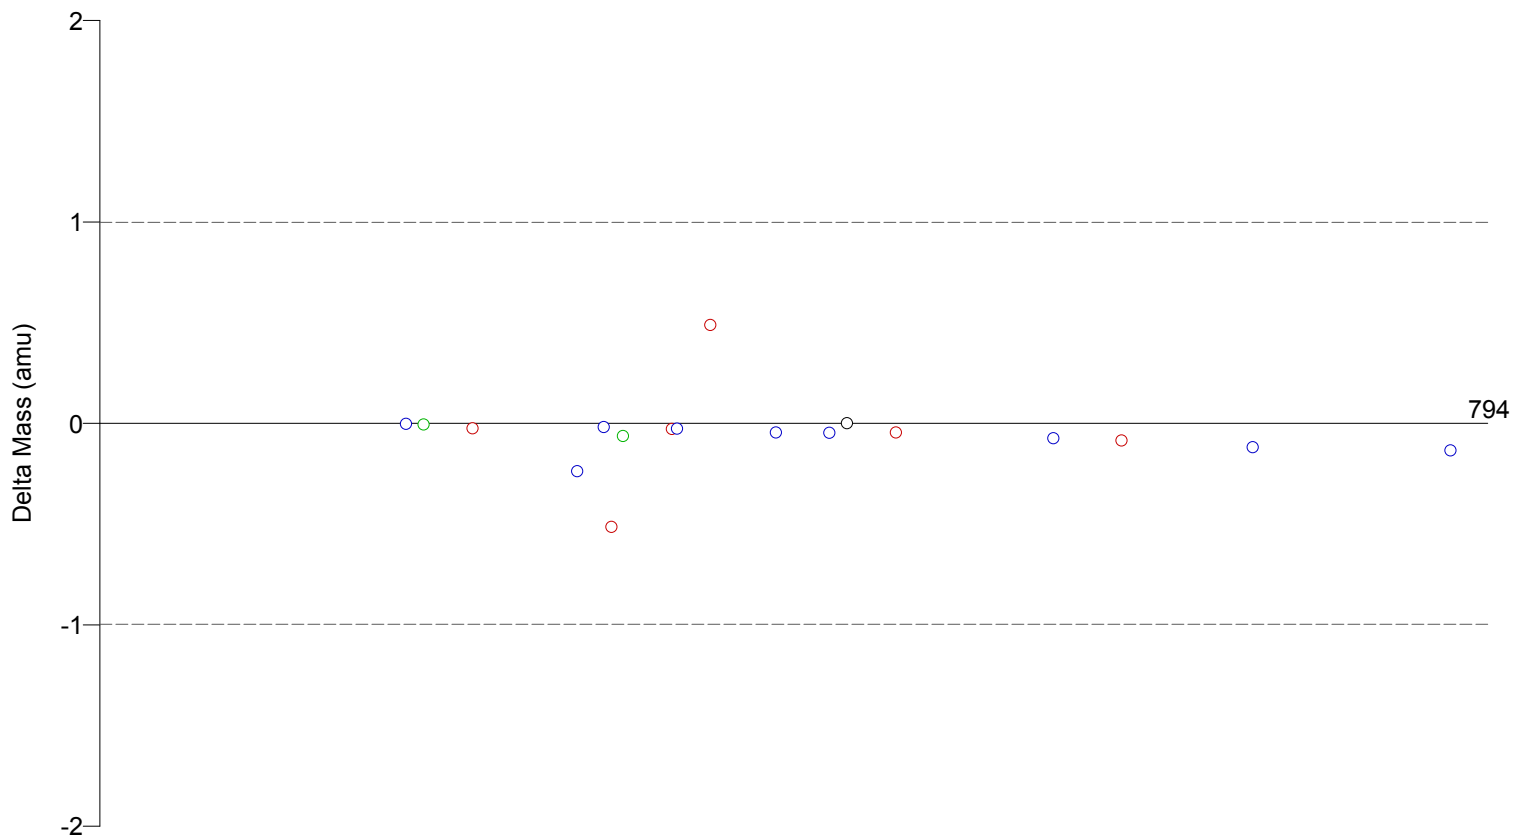

#19287468-1 NL: 5.11E5

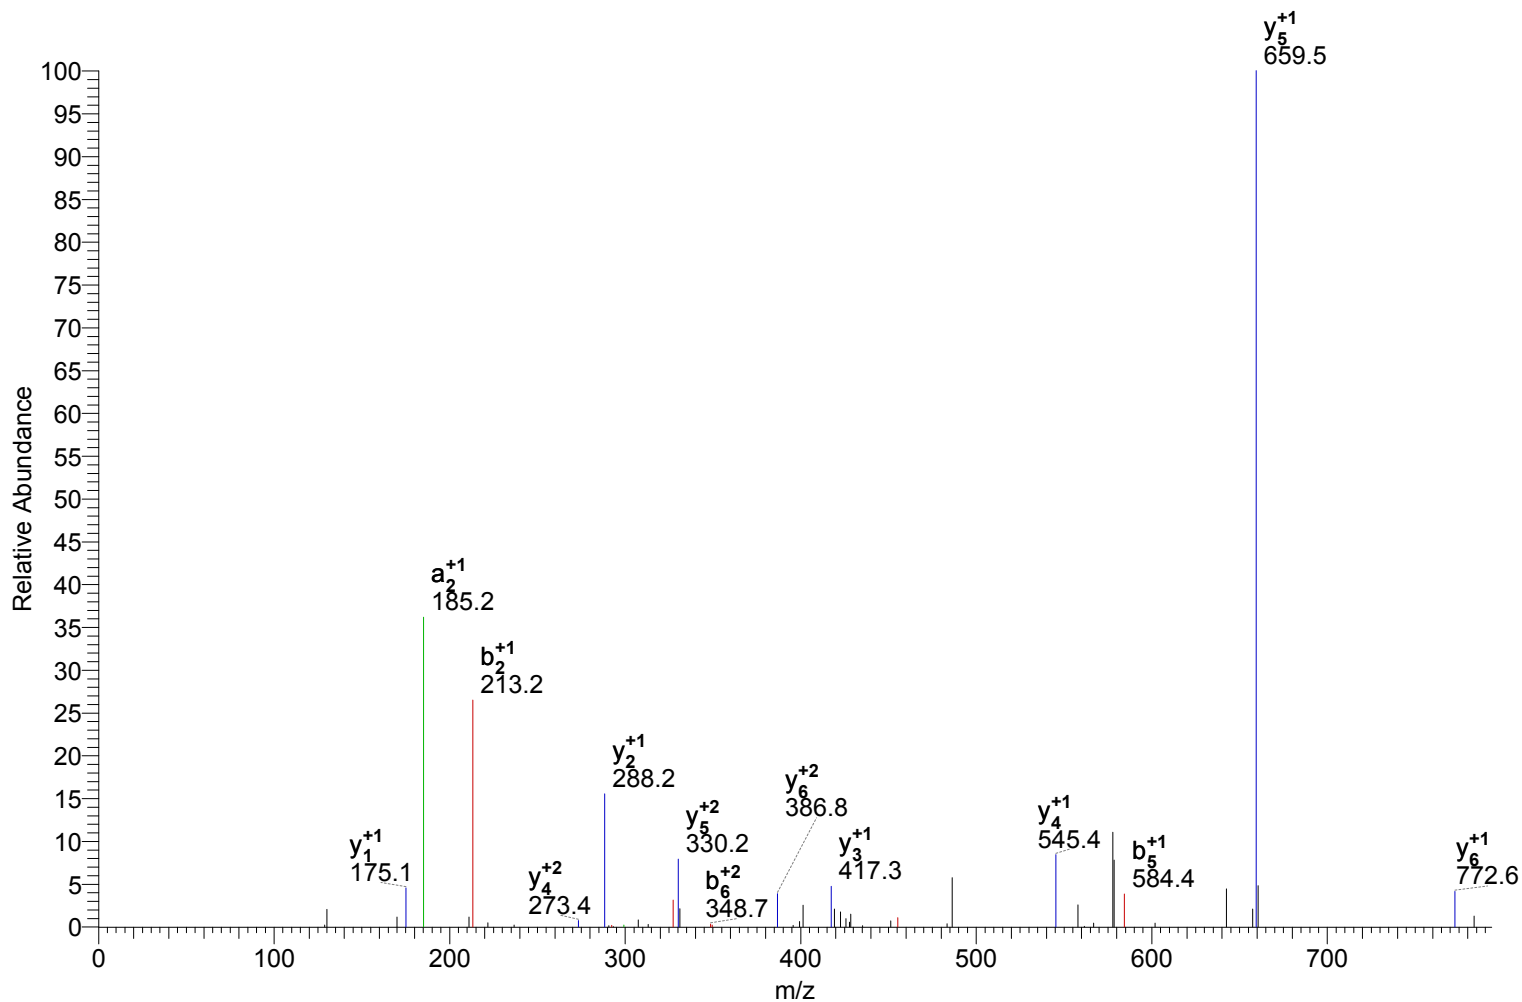

---

| Reference                          |             |        |   | P     | Score | Coverage | Accession |     |       |       |
|------------------------------------|-------------|--------|---|-------|-------|----------|-----------|-----|-------|-------|
| Scan(s)                            | Sequence    | MH+    | z | P     | XC    | DeltaCn  | Sp        | RSp | Ions  | Count |
| IPI:IPI00910432.1 TREMBL:B4DGC3 Ta |             |        |   | 0.3   | 10.1  | 0.0      | 0         |     |       |       |
| 19287468 - 1                       | K.VLNQELR.A | 871.50 | 2 | 0.004 | 2.210 | 0.309    | 564.0     | 1   | 13/18 | 3     |

1 of 1 peptide matches reported, 0 removed due to filtering

DTA for scans: 19287468-1  
Precursor ion: 436.25  
Mass type: mono  
Mod's: (M\* +15.99492) C=161.01468

Ion series for charge: +1

| AA | A ions        | B ions        | B* ions | Bo ions | C ions | Y ions        | Y* ions | Yo ions | Z ions |
|----|---------------|---------------|---------|---------|--------|---------------|---------|---------|--------|
| V  | 72.08         | 100.08        |         |         |        |               |         |         |        |
| L  | <b>185.16</b> | <b>213.16</b> |         |         |        | <b>772.43</b> |         |         |        |
| N  | <b>299.21</b> | <b>327.20</b> |         |         |        | <b>659.35</b> |         |         |        |
| Q  | 427.27        | <b>455.26</b> |         |         |        | <b>545.30</b> |         |         |        |
| E  | 556.31        | <b>584.30</b> |         |         |        | <b>417.25</b> |         |         |        |
| L  | 669.39        | 697.39        |         |         |        | <b>288.20</b> |         |         |        |
| R  |               |               |         |         |        | <b>175.12</b> |         |         |        |



#19287468-1 NL: 5.11E5



---

| Reference                          |             |        |   | P     | Score | Coverage | Accession |     |       |       |
|------------------------------------|-------------|--------|---|-------|-------|----------|-----------|-----|-------|-------|
| Scan(s)                            | Sequence    | MH+    | z | P     | XC    | DeltaCn  | Sp        | RSp | Ions  | Count |
| IPI:IPI00924574.1 VEGA:OTTHUMP0000 |             |        |   | 0.3   | 10.1  | 0.0      | 0         |     |       |       |
| 19287468 - 1                       | K.VLNQELR.A | 871.50 | 2 | 0.004 | 2.210 | 0.309    | 564.0     | 1   | 13/18 | 3     |

1 of 1 peptide matches reported, 0 removed due to filtering

DTA for scans: 19287468-1  
Precursor ion: 436.25  
Mass type: mono  
Mod's: (M\* +15.99492) C=161.01468

Ion series for charge: +1

| AA | A ions        | B ions        | B* ions | Bo ions | C ions | Y ions        | Y* ions | Yo ions | Z ions |
|----|---------------|---------------|---------|---------|--------|---------------|---------|---------|--------|
| V  | 72.08         | 100.08        |         |         |        |               |         |         |        |
| L  | <b>185.16</b> | <b>213.16</b> |         |         |        | <b>772.43</b> |         |         |        |
| N  | <b>299.21</b> | <b>327.20</b> |         |         |        | <b>659.35</b> |         |         |        |
| Q  | 427.27        | <b>455.26</b> |         |         |        | <b>545.30</b> |         |         |        |
| E  | 556.31        | <b>584.30</b> |         |         |        | <b>417.25</b> |         |         |        |
| L  | 669.39        | 697.39        |         |         |        | <b>288.20</b> |         |         |        |
| R  |               |               |         |         |        | <b>175.12</b> |         |         |        |



#19287468-1 NL: 5.11E5



---

| Reference                          |             |        |   | P     | Score | Coverage | Accession |     |       |       |
|------------------------------------|-------------|--------|---|-------|-------|----------|-----------|-----|-------|-------|
| Scan(s)                            | Sequence    | MH+    | z | P     | XC    | DeltaCn  | Sp        | RSp | Ions  | Count |
| IPI:IPI00927914.1 VEGA:OTTHUMP0000 |             |        |   | 0.3   | 10.1  | 0.0      | 0         |     |       |       |
| 19287468 - 1                       | K.VLNQELR.A | 871.50 | 2 | 0.004 | 2.210 | 0.309    | 564.0     | 1   | 13/18 | 3     |

1 of 1 peptide matches reported, 0 removed due to filtering



DTA for scans: 19287468-1  
Precursor ion: 436.25  
Mass type: mono  
Mod's: (M\* +15.99492) C=161.01468

Ion series for charge: +1

| AA | A ions        | B ions        | B* ions | Bo ions | C ions | Y ions        | Y* ions | Yo ions | Z ions |
|----|---------------|---------------|---------|---------|--------|---------------|---------|---------|--------|
| V  | 72.08         | 100.08        |         |         |        |               |         |         |        |
| L  | <b>185.16</b> | <b>213.16</b> |         |         |        | <b>772.43</b> |         |         |        |
| N  | <b>299.21</b> | <b>327.20</b> |         |         |        | <b>659.35</b> |         |         |        |
| Q  | 427.27        | <b>455.26</b> |         |         |        | <b>545.30</b> |         |         |        |
| E  | 556.31        | <b>584.30</b> |         |         |        | <b>417.25</b> |         |         |        |
| L  | 669.39        | 697.39        |         |         |        | <b>288.20</b> |         |         |        |
| R  |               |               |         |         |        | <b>175.12</b> |         |         |        |

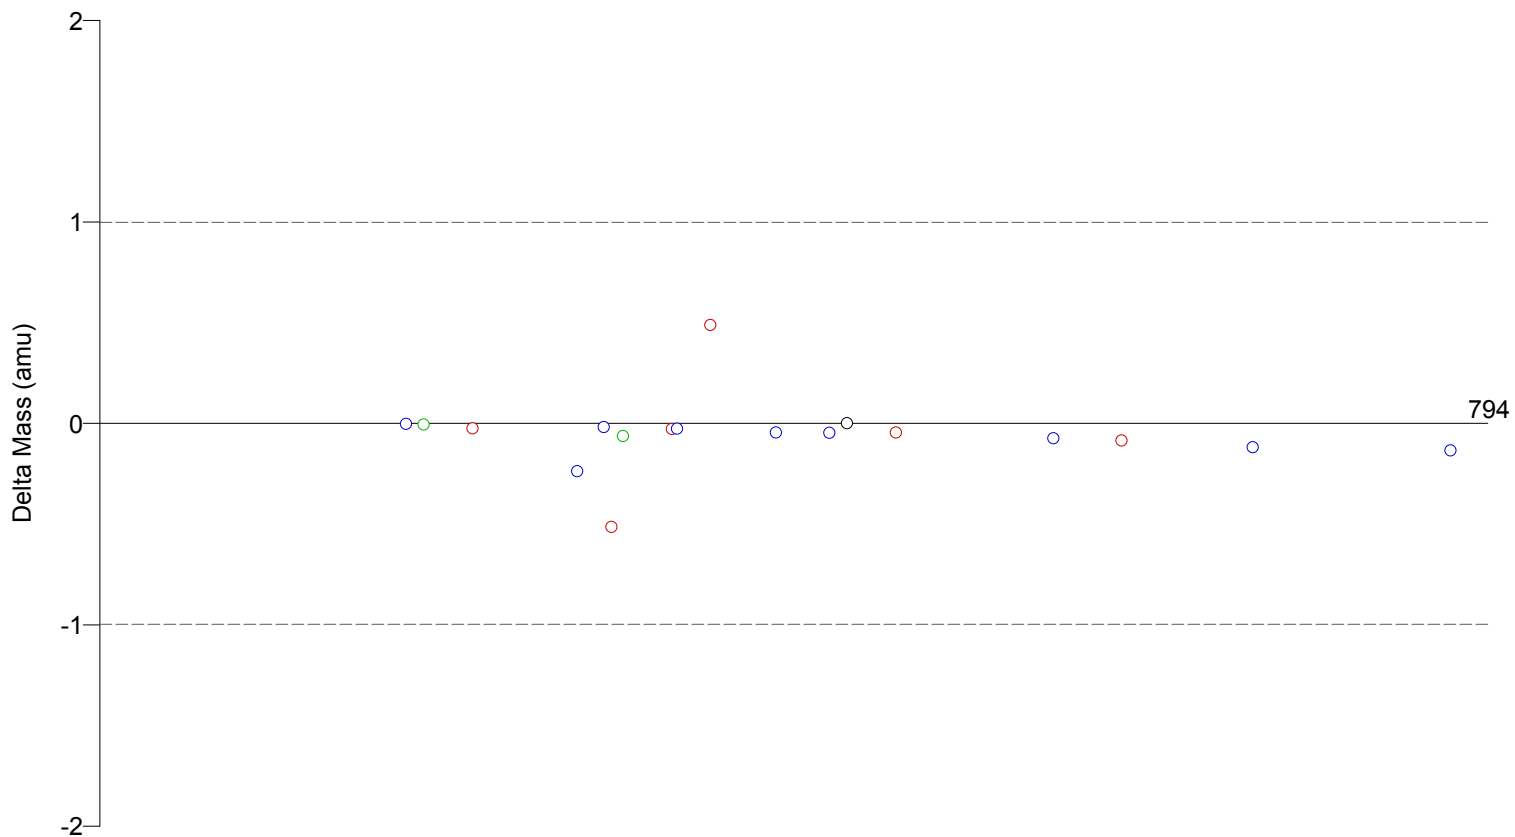

#19287468-1 NL: 5.11E5



---

| Reference                                                      |                |         |   | P     | Score | Coverage | Accession |     |       |       |
|----------------------------------------------------------------|----------------|---------|---|-------|-------|----------|-----------|-----|-------|-------|
| Scan(s)                                                        | Sequence       | MH+     | z | P     | XC    | DeltaCn  | Sp        | RSp | Ions  | Count |
| IPI:IPI00019580.1 SWISS-PROT:P00747 TREMBL:B2R7F8;B4DPH4;Q68DS |                |         |   | 0.3   | 10.1  | 0.0      | 0         |     |       |       |
| 19287468 - 1                                                   | K.LSSPAVITDK.V | 1030.58 | 2 | 0.004 | 2.679 | 0.346    | 201.9     | 1   | 13/27 |       |

1 of 1 peptide matches reported, 0 removed due to filtering

DTA for scans: 19287468-1  
Precursor ion: 515.79  
Mass type: mono  
Mod's: (M\* +15.99492) C=161.01468

Ion series for charge: +1

| AA | A ions        | B ions        | B* ions | Bo ions | C ions | Y ions        | Y* ions | Yo ions | Z ions |
|----|---------------|---------------|---------|---------|--------|---------------|---------|---------|--------|
| L  | 86.10         | 114.09        |         |         |        |               |         |         |        |
| S  | <b>173.13</b> | <b>201.12</b> |         |         |        | <b>917.49</b> |         |         |        |
| S  | 260.16        | <b>288.16</b> |         |         |        | <b>830.46</b> |         |         |        |
| P  | 357.21        | 385.21        |         |         |        | <b>743.43</b> |         |         |        |
| A  | 428.25        | 456.25        |         |         |        | <b>646.38</b> |         |         |        |
| V  | 527.32        | <b>555.31</b> |         |         |        | <b>575.34</b> |         |         |        |
| I  | 640.40        | <b>668.40</b> |         |         |        | <b>476.27</b> |         |         |        |
| T  | <b>741.45</b> | 769.45        |         |         |        | <b>363.19</b> |         |         |        |
| D  | 856.48        | 884.47        |         |         |        | 262.14        |         |         |        |
| K  |               |               |         |         |        | 147.11        |         |         |        |

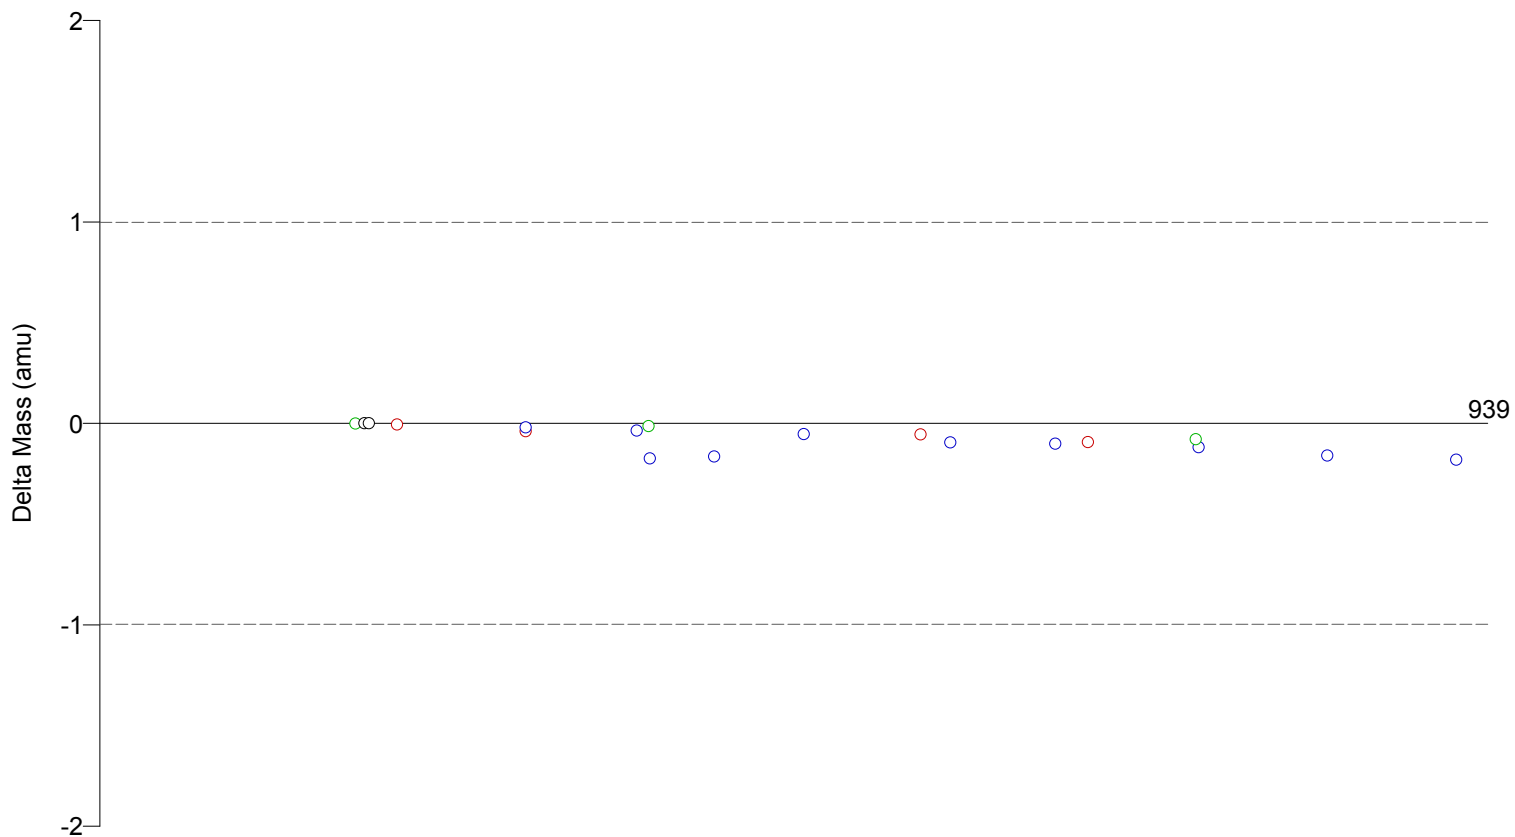

#19287468-1 NL: 6.13E5

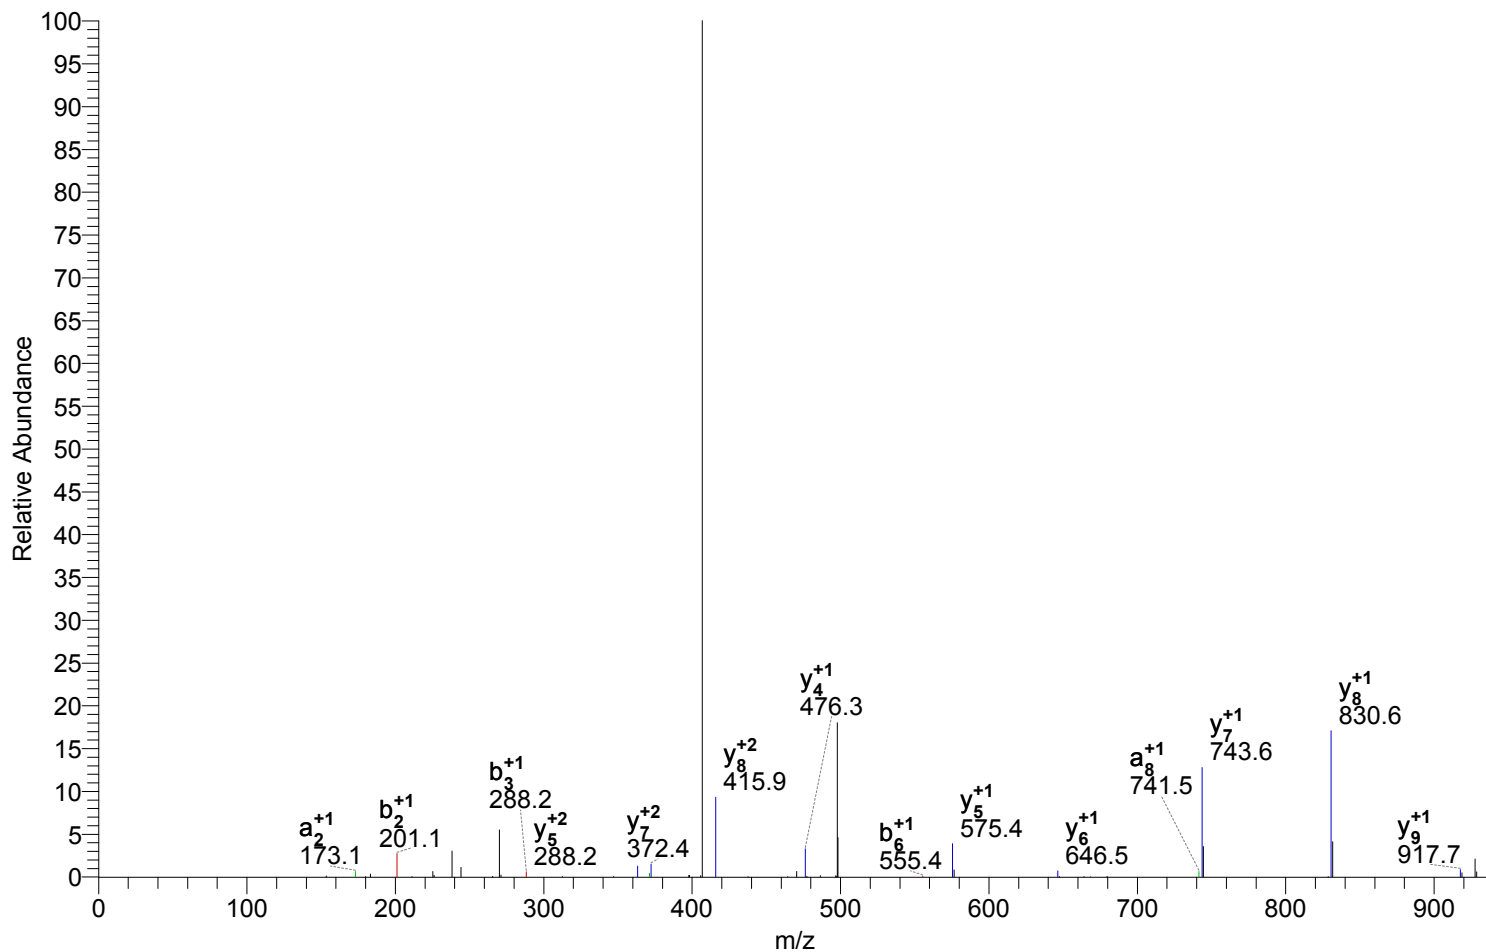

---

| Reference                                                      |               |        |   | P     | Score | Coverage | Accession |     |       |       |
|----------------------------------------------------------------|---------------|--------|---|-------|-------|----------|-----------|-----|-------|-------|
| Scan(s)                                                        | Sequence      | MH+    | z | P     | XC    | DeltaCn  | Sp        | RSp | Ions  | Count |
| IPI:IPI00477714.5 TREMBL:Q5NV62 ENSEMBL:ENSP00000374818 VEGA:O |               |        |   | 0.3   | 10.1  | 0.0      | 0         |     |       |       |
| 19287468 - 1                                                   | R.FSGSILGNK.A | 922.50 | 2 | 0.004 | 2.914 | 0.340    | 661.6     | 1   | 16/24 | 2     |

1 of 1 peptide matches reported, 0 removed due to filtering

DTA for scans: 19287468-1  
Precursor ion: 461.76  
Mass type: mono  
Mod's: (M\* +15.99492) C=161.01468

Ion series for charge: +1

| AA | A ions        | B ions        | B* ions | Bo ions | C ions | Y ions        | Y* ions | Yo ions | Z ions |
|----|---------------|---------------|---------|---------|--------|---------------|---------|---------|--------|
| F  | <b>120.08</b> | 148.08        |         |         |        |               |         |         |        |
| S  | <b>207.11</b> | <b>235.11</b> |         |         |        | <b>775.43</b> |         |         |        |
| G  | 264.13        | 292.13        |         |         |        | <b>688.40</b> |         |         |        |
| S  | 351.17        | <b>379.16</b> |         |         |        | <b>631.38</b> |         |         |        |
| I  | 464.25        | <b>492.25</b> |         |         |        | <b>544.35</b> |         |         |        |
| L  | <b>577.33</b> | <b>605.33</b> |         |         |        | <b>431.26</b> |         |         |        |
| G  | 634.36        | 662.35        |         |         |        | <b>318.18</b> |         |         |        |
| N  | 748.40        | 776.39        |         |         |        | <b>261.16</b> |         |         |        |
| K  |               |               |         |         |        | <b>147.11</b> |         |         |        |



#19287468-1 NL: 1.73E5





---

| Reference                          |               |        |   | P     | Score | Coverage | Accession |     |       |       |
|------------------------------------|---------------|--------|---|-------|-------|----------|-----------|-----|-------|-------|
| Scan(s)                            | Sequence      | MH+    | z | P     | XC    | DeltaCn  | Sp        | RSp | Ions  | Count |
| IPI:IPI00873719.1 TREMBL:A8MXK2 EN |               |        |   | 0.3   | 10.1  | 0.0      | 0         |     |       |       |
| 19287468 - 1                       | R.FSGSILGNK.A | 922.50 | 2 | 0.004 | 2.914 | 0.340    | 661.6     | 1   | 16/24 | 2     |

1 of 1 peptide matches reported, 0 removed due to filtering

DTA for scans: 19287468-1  
Precursor ion: 461.76  
Mass type: mono  
Mod's: (M\* +15.99492) C=161.01468

Ion series for charge: +1

| AA | A ions        | B ions        | B* ions | Bo ions | C ions | Y ions        | Y* ions | Yo ions | Z ions |
|----|---------------|---------------|---------|---------|--------|---------------|---------|---------|--------|
| F  | <b>120.08</b> | 148.08        |         |         |        |               |         |         |        |
| S  | <b>207.11</b> | <b>235.11</b> |         |         |        | <b>775.43</b> |         |         |        |
| G  | 264.13        | 292.13        |         |         |        | <b>688.40</b> |         |         |        |
| S  | 351.17        | <b>379.16</b> |         |         |        | <b>631.38</b> |         |         |        |
| I  | 464.25        | <b>492.25</b> |         |         |        | <b>544.35</b> |         |         |        |
| L  | <b>577.33</b> | <b>605.33</b> |         |         |        | <b>431.26</b> |         |         |        |
| G  | 634.36        | 662.35        |         |         |        | <b>318.18</b> |         |         |        |
| N  | 748.40        | 776.39        |         |         |        | <b>261.16</b> |         |         |        |
| K  |               |               |         |         |        | <b>147.11</b> |         |         |        |



#19287468-1 NL: 1.73E5



---

| Reference                                                      |              |        |   | P     | Score | Coverage | Accession |     |       |       |
|----------------------------------------------------------------|--------------|--------|---|-------|-------|----------|-----------|-----|-------|-------|
| Scan(s)                                                        | Sequence     | MH+    | z | P     | XC    | DeltaCn  | Sp        | RSp | Ions  | Count |
| IPI:IPI00218192.3 SWISS-PROT:Q14624-2 TREMBL:B7Z544 ENSEMBL:EN |              |        |   | 0.3   | 10.1  | 0.0      | 0         |     |       |       |
| 19287468 - 1                                                   | K.ILDDLSPR.D | 928.51 | 2 | 0.005 | 2.464 | 0.419    | 541.6     | 1   | 14/21 | 5     |

1 of 1 peptide matches reported, 0 removed due to filtering

DTA for scans: 19287468-1  
Precursor ion: 464.76  
Mass type: mono  
Mod's: (M\* +15.99492) C=161.01468

Ion series for charge: +1

| AA | A ions        | B ions        | B* ions | Bo ions | C ions | Y ions        | Y* ions | Yo ions | Z ions |
|----|---------------|---------------|---------|---------|--------|---------------|---------|---------|--------|
| I  | 86.10         | 114.09        |         |         |        |               |         |         |        |
| L  | <b>199.18</b> | <b>227.18</b> |         |         |        | <b>815.43</b> |         |         |        |
| D  | 314.21        | <b>342.20</b> |         |         |        | <b>702.34</b> |         |         |        |
| D  | 429.23        | 457.23        |         |         |        | <b>587.31</b> |         |         |        |
| L  | <b>542.32</b> | <b>570.31</b> |         |         |        | <b>472.29</b> |         |         |        |
| S  | 629.35        | <b>657.35</b> |         |         |        | <b>359.20</b> |         |         |        |
| P  | 726.40        | 754.40        |         |         |        | <b>272.17</b> |         |         |        |
| R  |               |               |         |         |        | <b>175.12</b> |         |         |        |

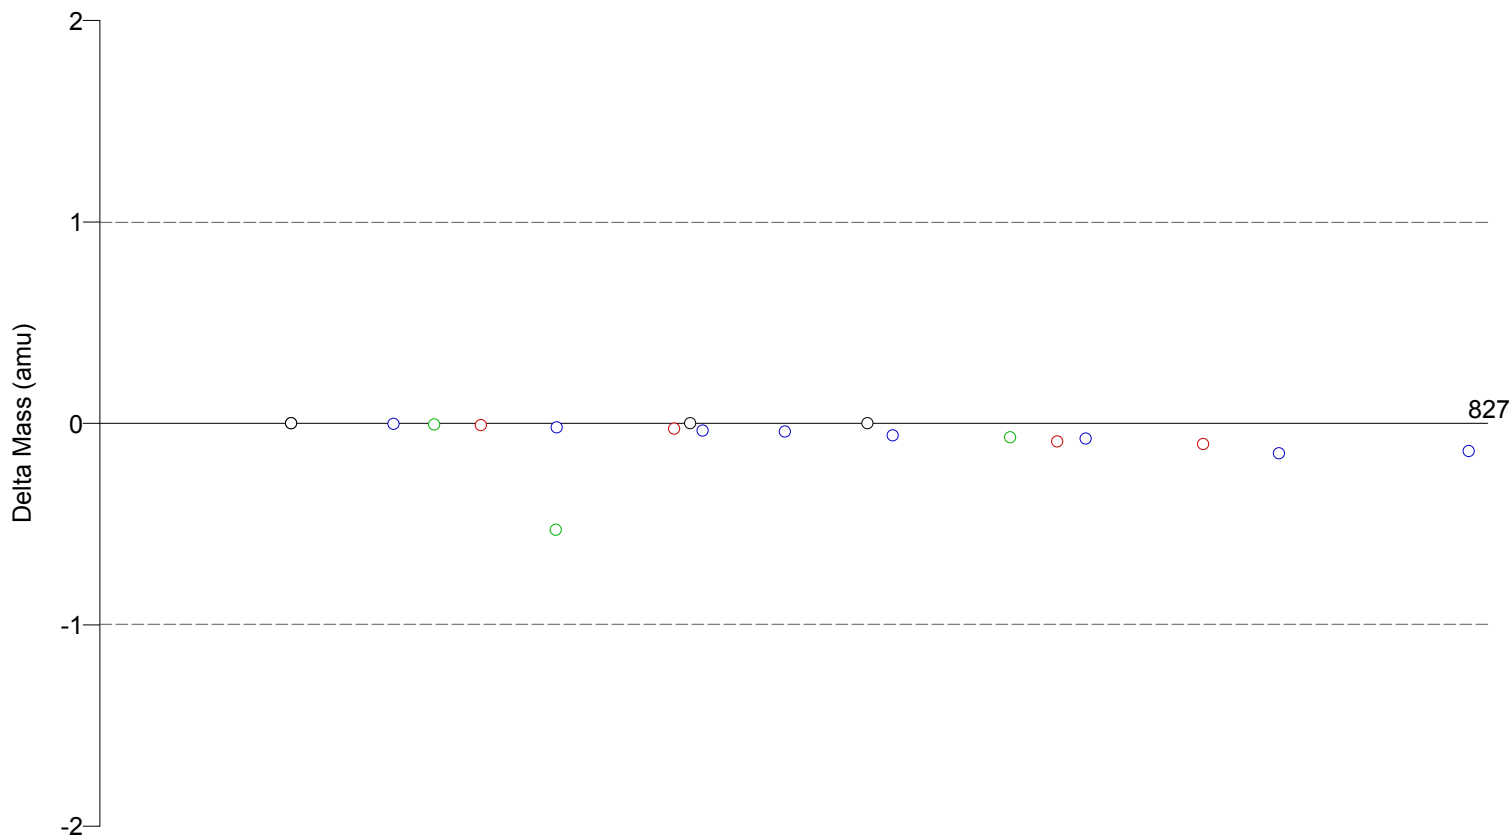

#19287468-1 NL: 1.36E6

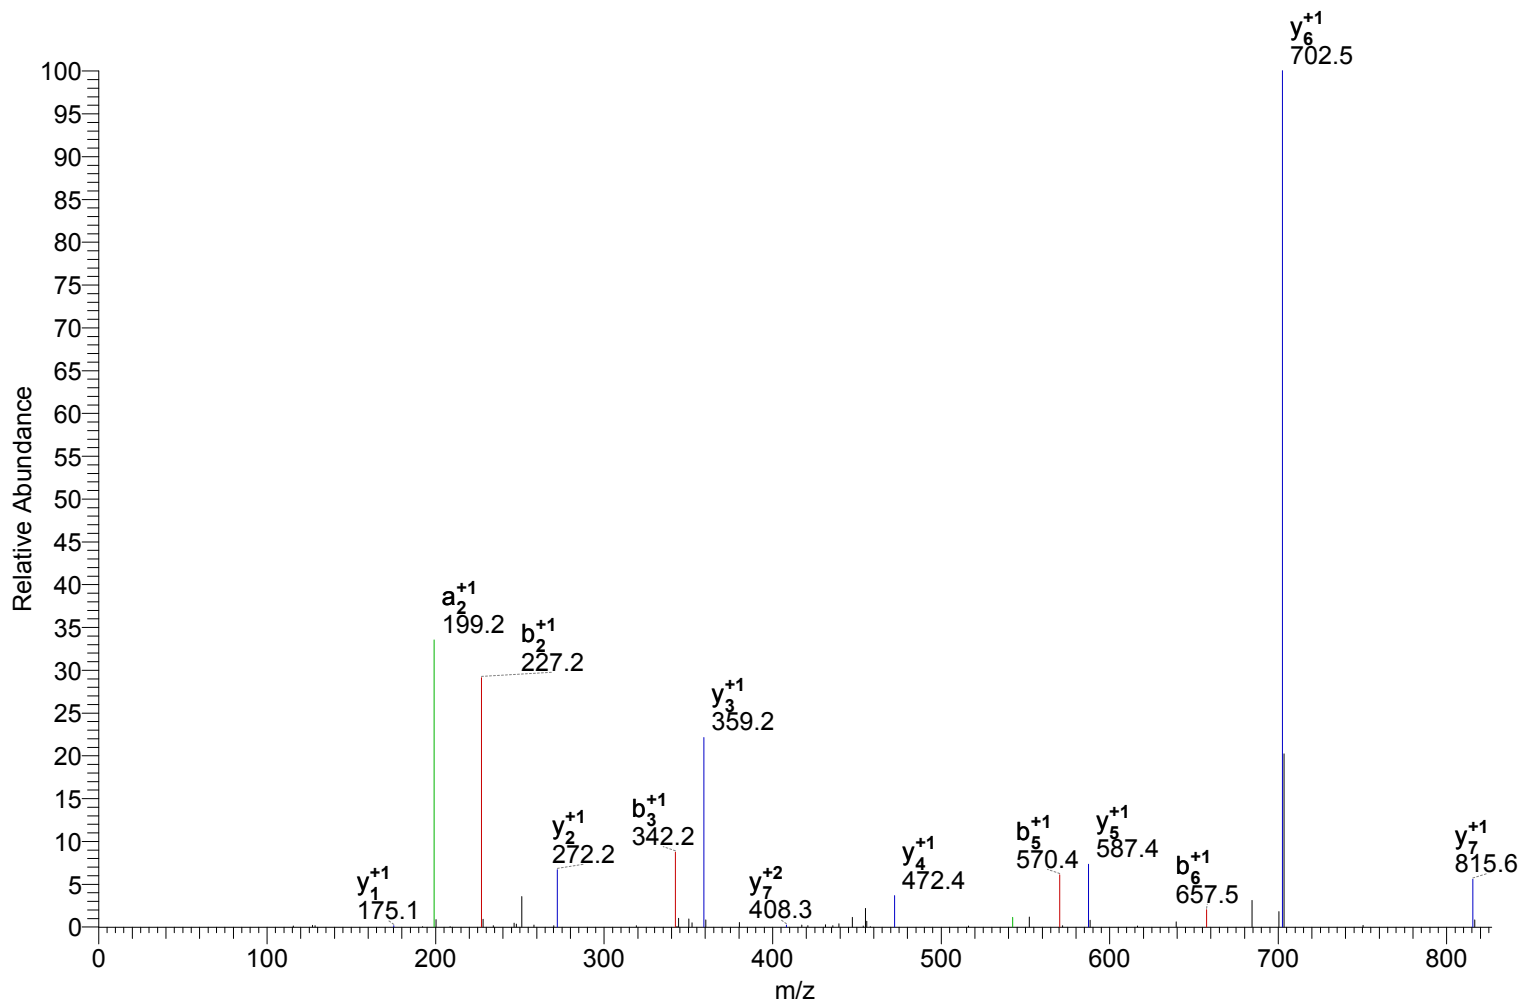

---

| Reference                          |             |        |   | P     | Score | Coverage | Accession |     |       |       |
|------------------------------------|-------------|--------|---|-------|-------|----------|-----------|-----|-------|-------|
| Scan(s)                            | Sequence    | MH+    | z | P     | XC    | DeltaCn  | Sp        | RSp | Ions  | Count |
| IPI:IPI00791097.2 TREMBL:B7Z8Q7 VE |             |        |   | 0.3   | 10.1  | 0.0      | 0         |     |       |       |
| 19287468 - 1                       | K.ILDDLSR.D | 928.51 | 2 | 0.005 | 2.464 | 0.419    | 541.6     | 1   | 14/21 | 5     |

1 of 1 peptide matches reported, 0 removed due to filtering

DTA for scans: 19287468-1  
Precursor ion: 464.76  
Mass type: mono  
Mod's: (M\* +15.99492) C=161.01468

Ion series for charge: +1

| AA | A ions        | B ions        | B* ions | Bo ions | C ions | Y ions        | Y* ions | Yo ions | Z ions |
|----|---------------|---------------|---------|---------|--------|---------------|---------|---------|--------|
| I  | 86.10         | 114.09        |         |         |        |               |         |         |        |
| L  | <b>199.18</b> | <b>227.18</b> |         |         |        | <b>815.43</b> |         |         |        |
| D  | 314.21        | <b>342.20</b> |         |         |        | <b>702.34</b> |         |         |        |
| D  | 429.23        | 457.23        |         |         |        | <b>587.31</b> |         |         |        |
| L  | <b>542.32</b> | <b>570.31</b> |         |         |        | <b>472.29</b> |         |         |        |
| S  | 629.35        | <b>657.35</b> |         |         |        | <b>359.20</b> |         |         |        |
| P  | 726.40        | 754.40        |         |         |        | <b>272.17</b> |         |         |        |
| R  |               |               |         |         |        | <b>175.12</b> |         |         |        |





#19287468-1 NL: 1.36E6



---

| Reference                          |              |        |   | P     | Score | Coverage | Accession |     |       |       |
|------------------------------------|--------------|--------|---|-------|-------|----------|-----------|-----|-------|-------|
| Scan(s)                            | Sequence     | MH+    | z | P     | XC    | DeltaCn  | Sp        | RSp | Ions  | Count |
| IPI:IPI00798006.1 VEGA:OTTHUMP0000 |              |        |   | 0.3   | 10.1  | 0.0      | 0         |     |       |       |
| 19287468 - 1                       | K.ILDDLSPR.D | 928.51 | 2 | 0.005 | 2.464 | 0.419    | 541.6     | 1   | 14/21 | 5     |

1 of 1 peptide matches reported, 0 removed due to filtering

DTA for scans: 19287468-1  
Precursor ion: 464.76  
Mass type: mono  
Mod's: (M\* +15.99492) C=161.01468

Ion series for charge: +1

| AA | A ions        | B ions        | B* ions | Bo ions | C ions | Y ions        | Y* ions | Yo ions | Z ions |
|----|---------------|---------------|---------|---------|--------|---------------|---------|---------|--------|
| I  | 86.10         | 114.09        |         |         |        |               |         |         |        |
| L  | <b>199.18</b> | <b>227.18</b> |         |         |        | <b>815.43</b> |         |         |        |
| D  | 314.21        | <b>342.20</b> |         |         |        | <b>702.34</b> |         |         |        |
| D  | 429.23        | 457.23        |         |         |        | <b>587.31</b> |         |         |        |
| L  | <b>542.32</b> | <b>570.31</b> |         |         |        | <b>472.29</b> |         |         |        |
| S  | 629.35        | <b>657.35</b> |         |         |        | <b>359.20</b> |         |         |        |
| P  | 726.40        | 754.40        |         |         |        | <b>272.17</b> |         |         |        |
| R  |               |               |         |         |        | <b>175.12</b> |         |         |        |



#19287468-1 NL: 1.36E6



---

| Reference                          |              |        |   | P     | Score | Coverage | Accession |     |       |       |
|------------------------------------|--------------|--------|---|-------|-------|----------|-----------|-----|-------|-------|
| Scan(s)                            | Sequence     | MH+    | z | P     | XC    | DeltaCn  | Sp        | RSp | Ions  | Count |
| IPI:IPI00896413.1 ENSEMBL:ENSP0000 |              |        |   | 0.3   | 10.1  | 0.0      | 0         |     |       |       |
| 19287468 - 1                       | K.ILDDLSPR.D | 928.51 | 2 | 0.005 | 2.464 | 0.419    | 541.6     | 1   | 14/21 | 5     |

1 of 1 peptide matches reported, 0 removed due to filtering

DTA for scans: 19287468-1  
Precursor ion: 464.76  
Mass type: mono  
Mod's: (M\* +15.99492) C=161.01468

Ion series for charge: +1

| AA | A ions        | B ions        | B* ions | Bo ions | C ions | Y ions        | Y* ions | Yo ions | Z ions |
|----|---------------|---------------|---------|---------|--------|---------------|---------|---------|--------|
| I  | 86.10         | 114.09        |         |         |        |               |         |         |        |
| L  | <b>199.18</b> | <b>227.18</b> |         |         |        | <b>815.43</b> |         |         |        |
| D  | 314.21        | <b>342.20</b> |         |         |        | <b>702.34</b> |         |         |        |
| D  | 429.23        | 457.23        |         |         |        | <b>587.31</b> |         |         |        |
| L  | <b>542.32</b> | <b>570.31</b> |         |         |        | <b>472.29</b> |         |         |        |
| S  | 629.35        | <b>657.35</b> |         |         |        | <b>359.20</b> |         |         |        |
| P  | 726.40        | 754.40        |         |         |        | <b>272.17</b> |         |         |        |
| R  |               |               |         |         |        | <b>175.12</b> |         |         |        |



#19287468-1 NL: 1.36E6



---

| Reference                          |              |        |   | P     | Score | Coverage | Accession |     |       |       |
|------------------------------------|--------------|--------|---|-------|-------|----------|-----------|-----|-------|-------|
| Scan(s)                            | Sequence     | MH+    | z | P     | XC    | DeltaCn  | Sp        | RSp | Ions  | Count |
| IPI:IPI00896419.2 SWISS-PROT:Q1462 |              |        |   | 0.3   | 10.1  | 0.0      | 0         |     |       |       |
| 19287468 - 1                       | K.ILDDLSPR.D | 928.51 | 2 | 0.005 | 2.464 | 0.419    | 541.6     | 1   | 14/21 | 5     |

1 of 1 peptide matches reported, 0 removed due to filtering



DTA for scans: 19287468-1  
Precursor ion: 464.76  
Mass type: mono  
Mod's: (M\* +15.99492) C=161.01468

Ion series for charge: +1

| AA | A ions        | B ions        | B* ions | Bo ions | C ions | Y ions        | Y* ions | Yo ions | Z ions |
|----|---------------|---------------|---------|---------|--------|---------------|---------|---------|--------|
| I  | 86.10         | 114.09        |         |         |        |               |         |         |        |
| L  | <b>199.18</b> | <b>227.18</b> |         |         |        | <b>815.43</b> |         |         |        |
| D  | 314.21        | <b>342.20</b> |         |         |        | <b>702.34</b> |         |         |        |
| D  | 429.23        | 457.23        |         |         |        | <b>587.31</b> |         |         |        |
| L  | <b>542.32</b> | <b>570.31</b> |         |         |        | <b>472.29</b> |         |         |        |
| S  | 629.35        | <b>657.35</b> |         |         |        | <b>359.20</b> |         |         |        |
| P  | 726.40        | 754.40        |         |         |        | <b>272.17</b> |         |         |        |
| R  |               |               |         |         |        | <b>175.12</b> |         |         |        |



#19287468-1 NL: 1.36E6



---

| Reference                          |             |        |   | P     | Score | Coverage | Accession |     |       |       |
|------------------------------------|-------------|--------|---|-------|-------|----------|-----------|-----|-------|-------|
| Scan(s)                            | Sequence    | MH+    | z | P     | XC    | DeltaCn  | Sp        | RSp | Ions  | Count |
| IPI:IPI00922043.1 VEGA:OTTHUMP0000 |             |        |   | 0.3   | 10.1  | 0.0      | 0         |     |       |       |
| 19287468 - 1                       | K.ILDDLSR.D | 928.51 | 2 | 0.005 | 2.464 | 0.419    | 541.6     | 1   | 14/21 | 5     |

1 of 1 peptide matches reported, 0 removed due to filtering

DTA for scans: 19287468-1  
Precursor ion: 464.76  
Mass type: mono  
Mod's: (M\* +15.99492) C=161.01468

Ion series for charge: +1

| AA | A ions        | B ions        | B* ions | Bo ions | C ions | Y ions        | Y* ions | Yo ions | Z ions |
|----|---------------|---------------|---------|---------|--------|---------------|---------|---------|--------|
| I  | 86.10         | 114.09        |         |         |        |               |         |         |        |
| L  | <b>199.18</b> | <b>227.18</b> |         |         |        | <b>815.43</b> |         |         |        |
| D  | 314.21        | <b>342.20</b> |         |         |        | <b>702.34</b> |         |         |        |
| D  | 429.23        | 457.23        |         |         |        | <b>587.31</b> |         |         |        |
| L  | <b>542.32</b> | <b>570.31</b> |         |         |        | <b>472.29</b> |         |         |        |
| S  | 629.35        | <b>657.35</b> |         |         |        | <b>359.20</b> |         |         |        |
| P  | 726.40        | 754.40        |         |         |        | <b>272.17</b> |         |         |        |
| R  |               |               |         |         |        | <b>175.12</b> |         |         |        |



#19287468-1 NL: 1.36E6



---

| Reference                                                      |          |         |   | P    | Score | Coverage | Accession |     |       |       |
|----------------------------------------------------------------|----------|---------|---|------|-------|----------|-----------|-----|-------|-------|
| Scan(s)                                                        | Sequence | MH+     | z | P    | XC    | DeltaCn  | Sp        | RSp | Ions  | Count |
| IPI:IPI00022295.1 SWISS-PROT:P10720 TREMBL:A1L4S0 ENSEMBL:ENSP |          |         |   | 0.5  | 10.1  | 0.0      | 0         |     |       |       |
| 2118291816 - R.HITSLEVIK.A                                     |          | 1039.61 | 2 | 0.01 | 2.472 | 0.301    | 457.5     | 1   | 14/24 | 1     |

1 of 1 peptide matches reported, 0 removed due to filtering

DTA for scans: 2118291816-26226248  
Precursor ion: 520.31  
Mass type: mono  
Mod's: (M\* +15.99492) C=161.01468

Ion series for charge: +1

| AA | A ions        | B ions        | B* ions | Bo ions | C ions | Y ions        | Y* ions | Yo ions | Z ions |
|----|---------------|---------------|---------|---------|--------|---------------|---------|---------|--------|
| H  | 110.07        | <b>138.07</b> |         |         |        |               |         |         |        |
| I  | <b>223.16</b> | <b>251.15</b> |         |         |        | <b>902.56</b> |         |         |        |
| T  | 324.20        | <b>352.20</b> |         |         |        | <b>789.47</b> |         |         |        |
| S  | 411.24        | 439.23        |         |         |        | <b>688.42</b> |         |         |        |
| L  | 524.32        | 552.31        |         |         |        | <b>601.39</b> |         |         |        |
| E  | 653.36        | <b>681.36</b> |         |         |        | <b>488.31</b> |         |         |        |
| V  | 752.43        | <b>780.43</b> |         |         |        | <b>359.27</b> |         |         |        |
| I  | 865.51        | <b>893.51</b> |         |         |        | <b>260.20</b> |         |         |        |
| K  |               |               |         |         |        | 147.11        |         |         |        |

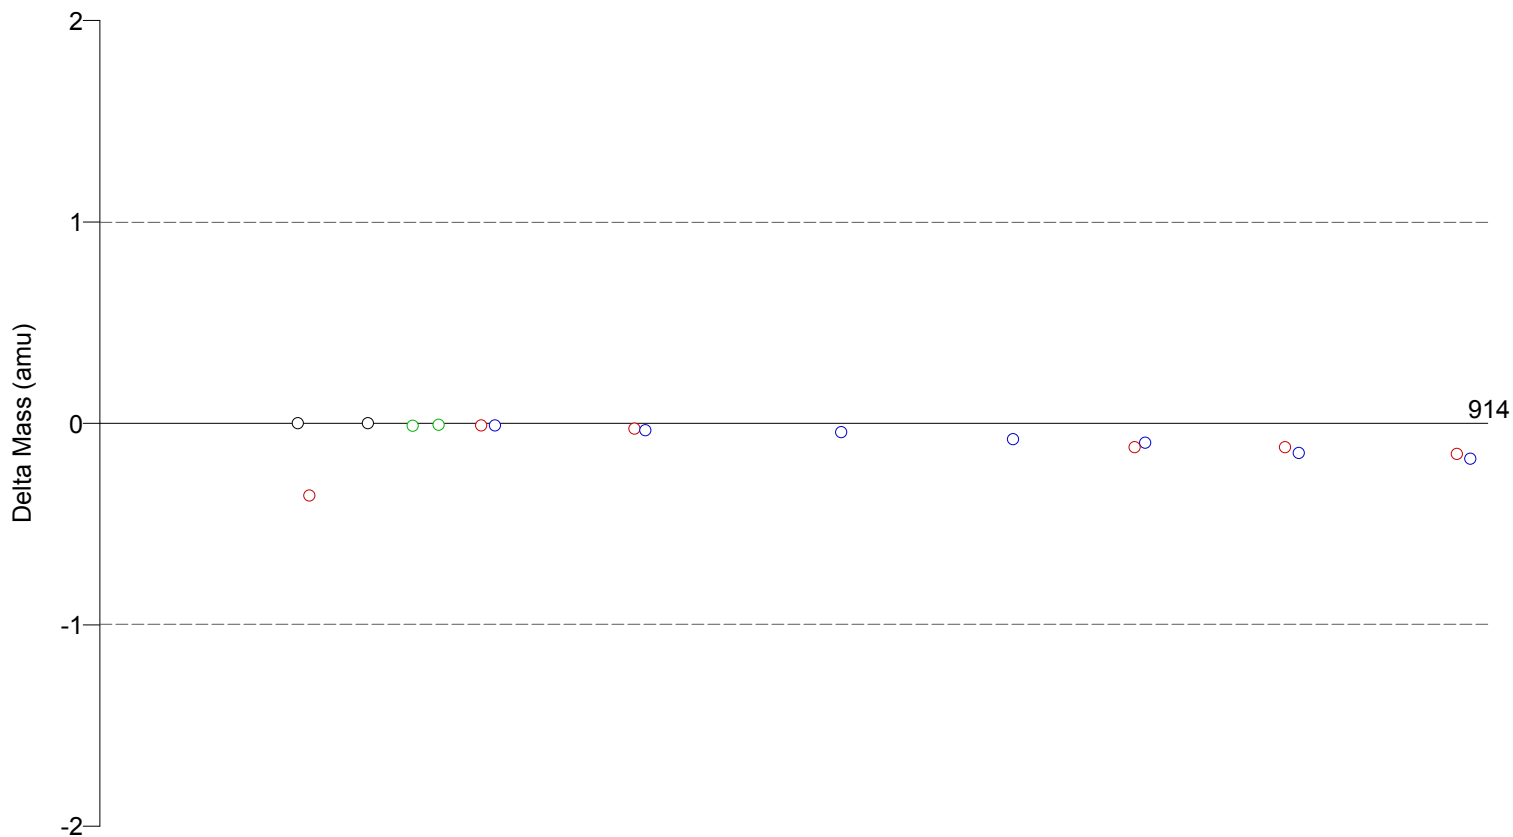

#2118291816-26226248 NL: 1.52E5

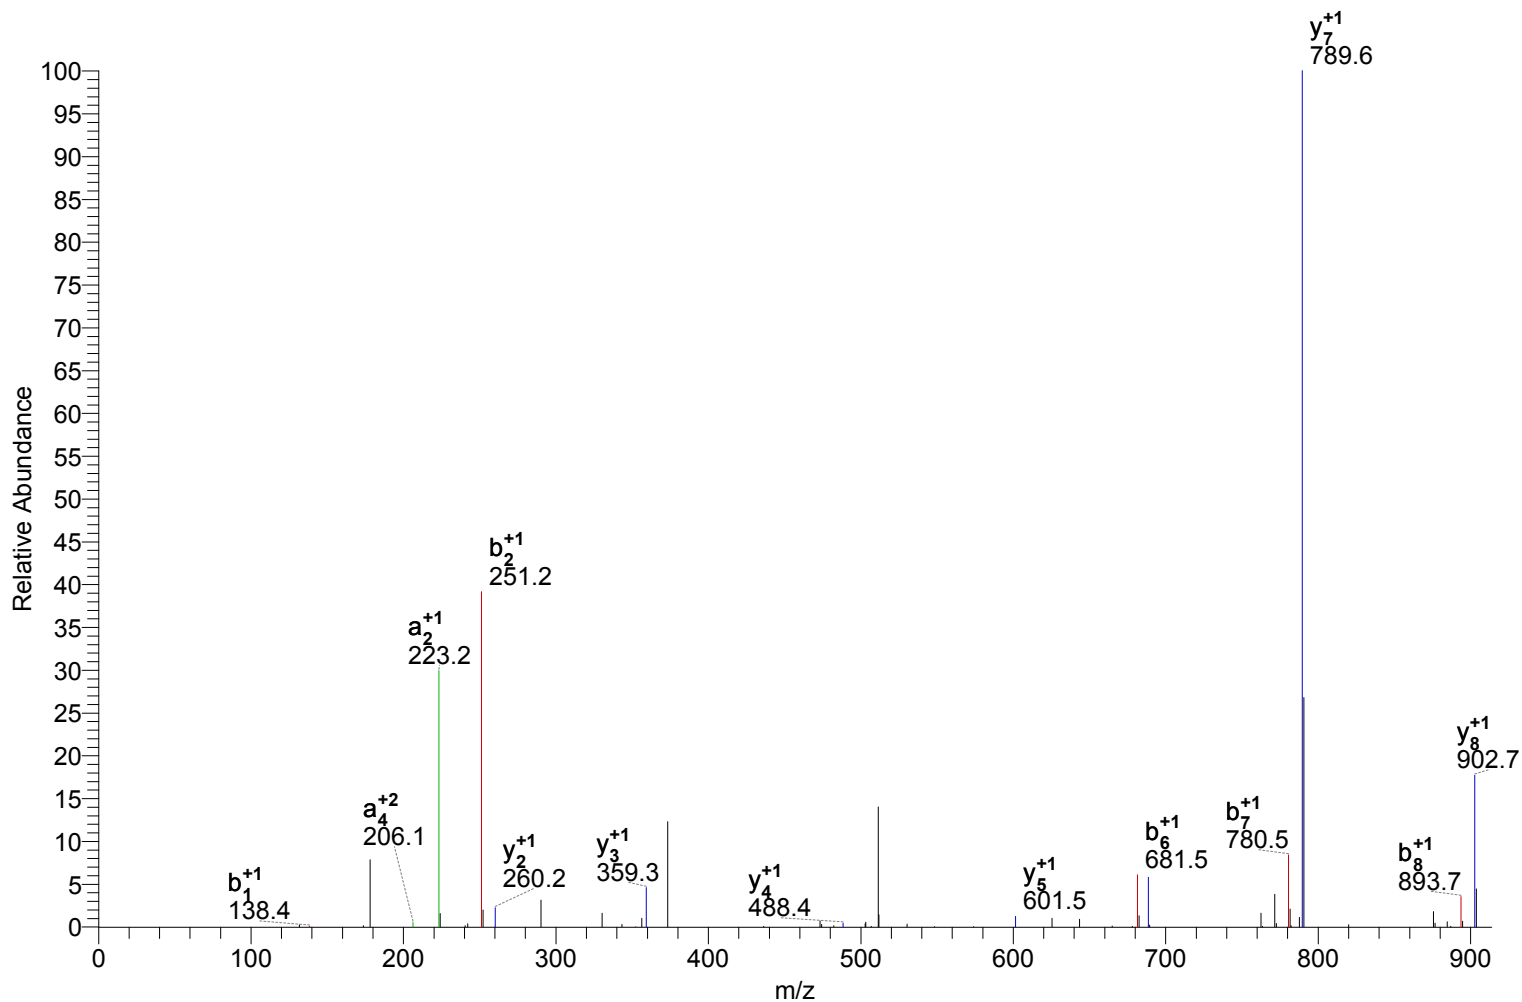



---

| Reference                          |          |         |   | P    | Score | Coverage | Accession |     |       |       |
|------------------------------------|----------|---------|---|------|-------|----------|-----------|-----|-------|-------|
| Scan(s)                            | Sequence | MH+     | z | P    | XC    | DeltaCn  | Sp        | RSp | Ions  | Count |
| IPI:IPI00022446.1 SWISS-PROT:P0277 |          |         |   | 0.5  | 10.1  | 0.0      | 0         |     |       |       |
| 2118291816 - R.HITSLEVIK.A         |          | 1039.61 | 2 | 0.01 | 2.472 | 0.301    | 457.5     | 1   | 14/24 | 1     |

1 of 1 peptide matches reported, 0 removed due to filtering

DTA for scans: 2118291816-26226248  
Precursor ion: 520.31  
Mass type: mono  
Mod's: (M\* +15.99492) C=161.01468

Ion series for charge: +1

| AA | A ions        | B ions        | B* ions | Bo ions | C ions | Y ions        | Y* ions | Yo ions | Z ions |
|----|---------------|---------------|---------|---------|--------|---------------|---------|---------|--------|
| H  | 110.07        | <b>138.07</b> |         |         |        |               |         |         |        |
| I  | <b>223.16</b> | <b>251.15</b> |         |         |        | <b>902.56</b> |         |         |        |
| T  | 324.20        | <b>352.20</b> |         |         |        | <b>789.47</b> |         |         |        |
| S  | 411.24        | 439.23        |         |         |        | <b>688.42</b> |         |         |        |
| L  | 524.32        | 552.31        |         |         |        | <b>601.39</b> |         |         |        |
| E  | 653.36        | <b>681.36</b> |         |         |        | <b>488.31</b> |         |         |        |
| V  | 752.43        | <b>780.43</b> |         |         |        | <b>359.27</b> |         |         |        |
| I  | 865.51        | <b>893.51</b> |         |         |        | <b>260.20</b> |         |         |        |
| K  |               |               |         |         |        | 147.11        |         |         |        |

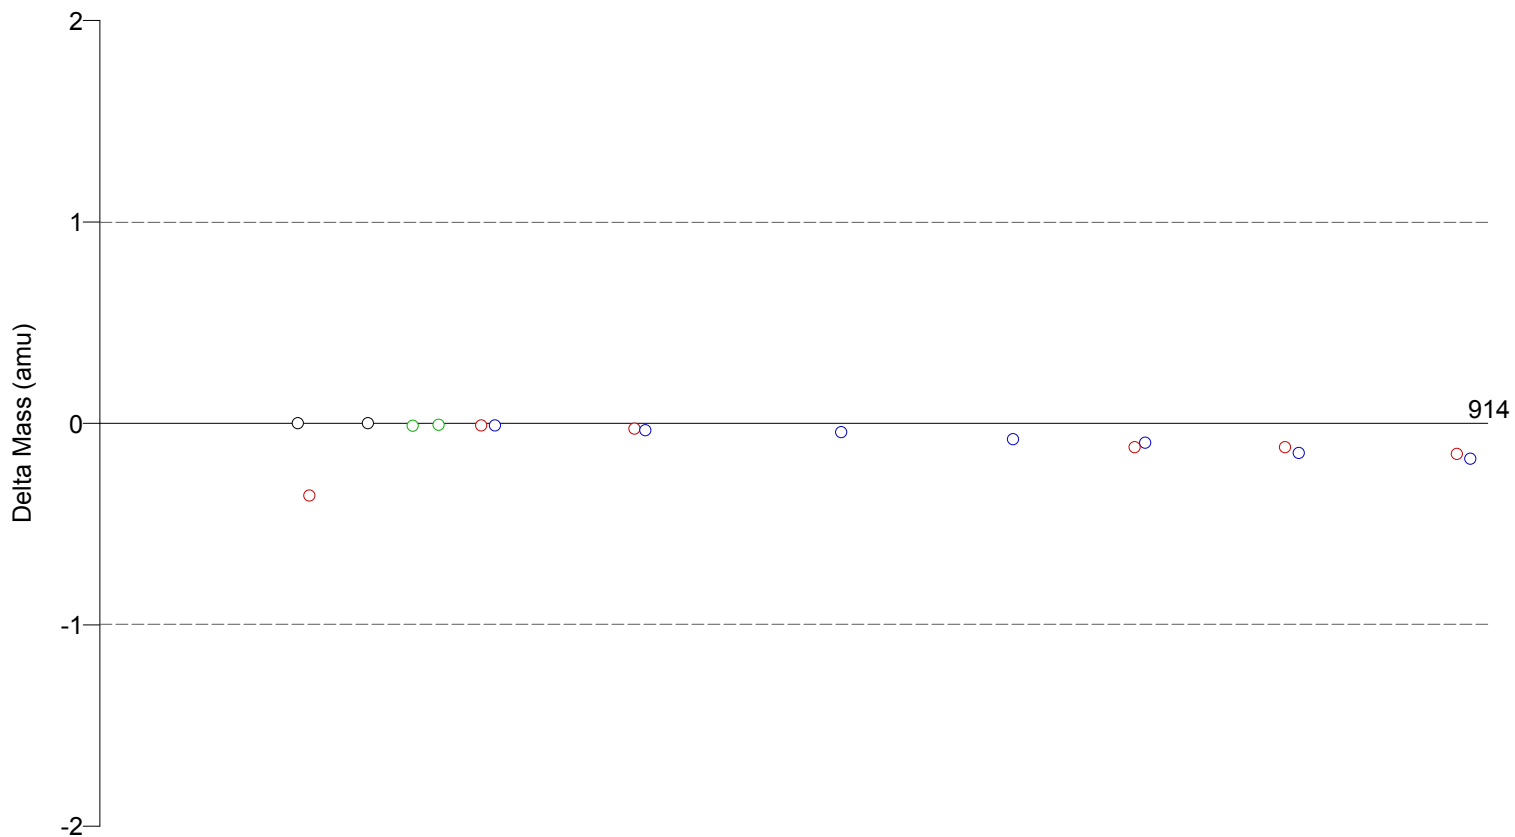

#2118291816-26226248 NL: 1.52E5



---

| Reference                       |                                |        |   | P    | Score | Coverage | Accession |     |       |       |
|---------------------------------|--------------------------------|--------|---|------|-------|----------|-----------|-----|-------|-------|
| Scan(s)                         | Sequence                       | MH+    | z | P    | XC    | DeltaCn  | Sp        | RSp | Ions  | Count |
| IPI:IPI00384401.1 TREMBL:Q9UL85 | Tax_Id=9606 Gene_Symbol=- Myos |        |   | 0.5  | 10.1  | 0.0      | 0         |     |       |       |
| 19287468 - 1                    | R.LLIYGASTR.A                  | 993.57 | 2 | 0.01 | 2.977 | 0.065    | 715.8     | 1   | 15/24 | 7     |

1 of 1 peptide matches reported, 0 removed due to filtering

DTA for scans: 19287468-1  
Precursor ion: 497.29  
Mass type: mono  
Mod's: (M\* +15.99492) C=161.01468

Ion series for charge: +1

| AA | A ions        | B ions        | B* ions | Bo ions | C ions | Y ions        | Y* ions | Yo ions | Z ions |
|----|---------------|---------------|---------|---------|--------|---------------|---------|---------|--------|
| L  | 86.10         | 114.09        |         |         |        |               |         |         |        |
| L  | <b>199.18</b> | <b>227.18</b> |         |         |        | <b>880.49</b> |         |         |        |
| I  | 312.26        | <b>340.26</b> |         |         |        | <b>767.40</b> |         |         |        |
| Y  | <b>475.33</b> | <b>503.32</b> |         |         |        | <b>654.32</b> |         |         |        |
| G  | 532.35        | <b>560.34</b> |         |         |        | <b>491.26</b> |         |         |        |
| A  | 603.39        | <b>631.38</b> |         |         |        | <b>434.24</b> |         |         |        |
| S  | 690.42        | 718.41        |         |         |        | <b>363.20</b> |         |         |        |
| T  | 791.47        | 819.46        |         |         |        | <b>276.17</b> |         |         |        |
| R  |               |               |         |         |        | <b>175.12</b> |         |         |        |

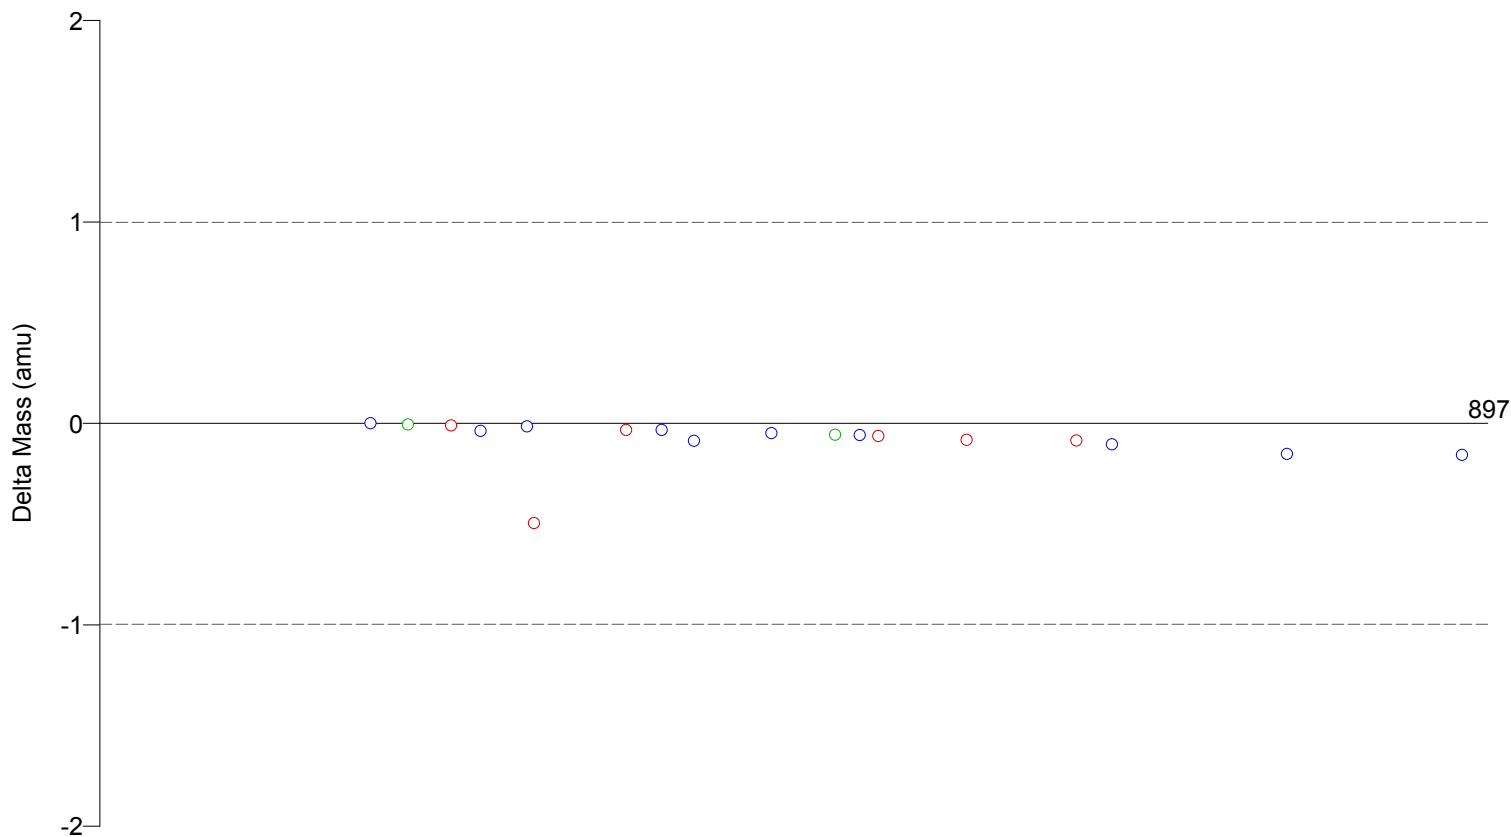

#19287468-1 NL: 1.29E6

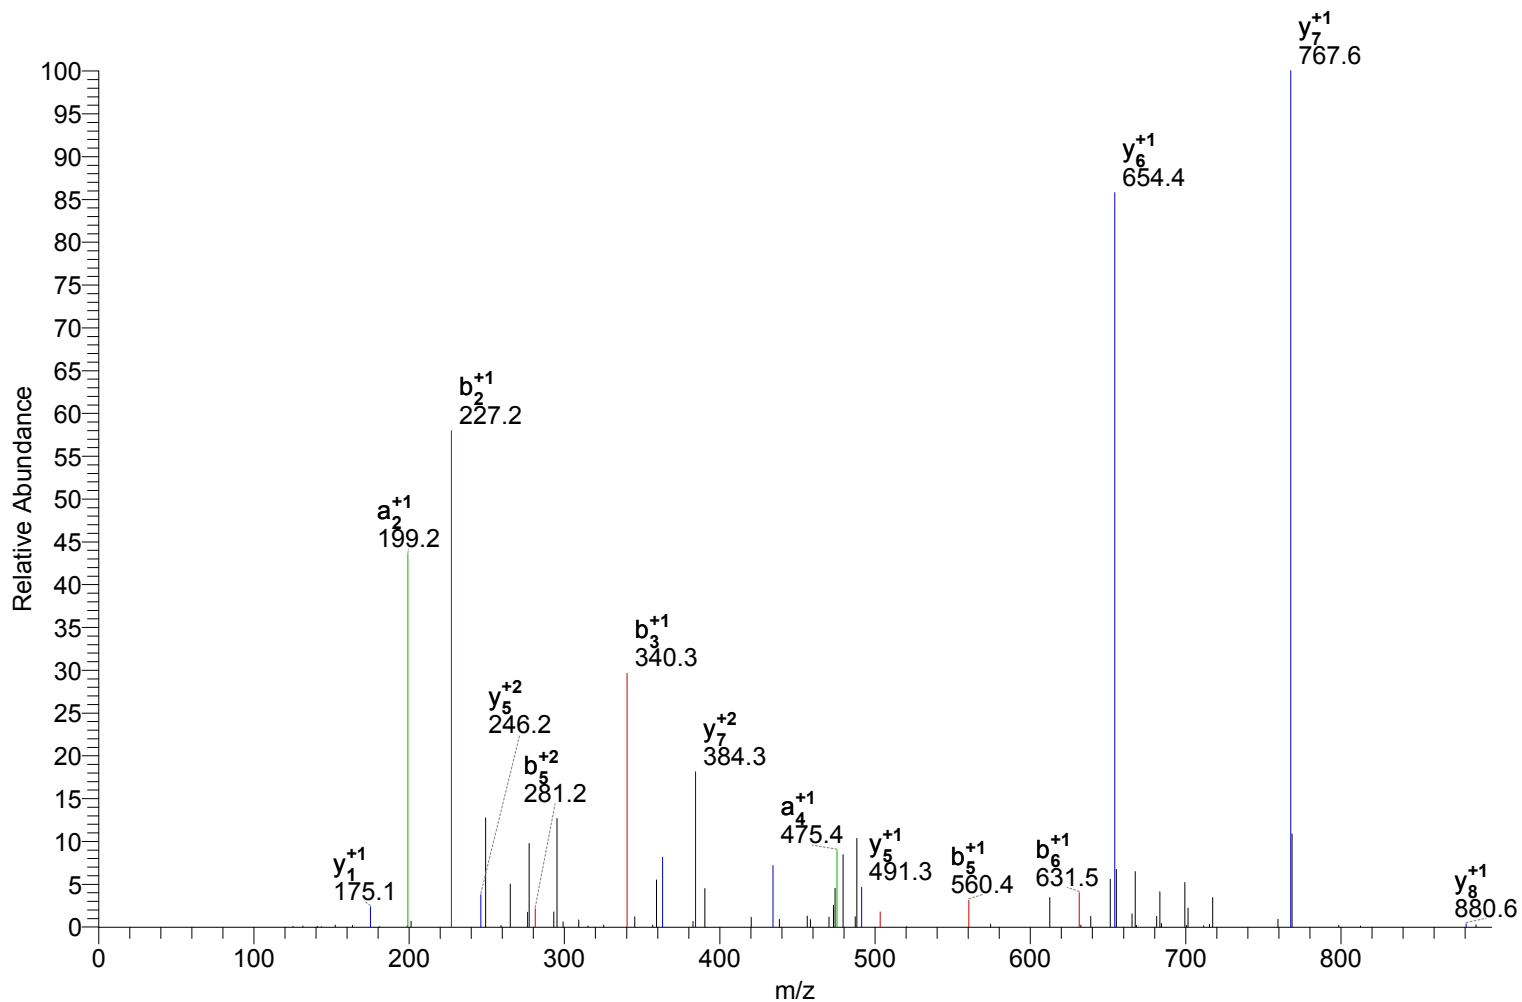

---

| Reference                          |               |        |   | P    | Score | Coverage | Accession |     |       |       |
|------------------------------------|---------------|--------|---|------|-------|----------|-----------|-----|-------|-------|
| Scan(s)                            | Sequence      | MH+    | z | P    | XC    | DeltaCn  | Sp        | RSp | Ions  | Count |
| IPI:IPI00385253.1 SWISS-PROT:P0420 |               |        |   | 0.5  | 10.1  | 0.0      | 0         |     |       |       |
| 19287468 - 1                       | R.LLIYGASTR.A | 993.57 | 2 | 0.01 | 2.977 | 0.065    | 715.8     | 1   | 15/24 | 7     |

1 of 1 peptide matches reported, 0 removed due to filtering

DTA for scans: 19287468-1  
Precursor ion: 497.29  
Mass type: mono  
Mod's: (M\* +15.99492) C=161.01468

Ion series for charge: +1

| AA | A ions        | B ions        | B* ions | Bo ions | C ions | Y ions        | Y* ions | Yo ions | Z ions |
|----|---------------|---------------|---------|---------|--------|---------------|---------|---------|--------|
| L  | 86.10         | 114.09        |         |         |        |               |         |         |        |
| L  | <b>199.18</b> | <b>227.18</b> |         |         |        | <b>880.49</b> |         |         |        |
| I  | 312.26        | <b>340.26</b> |         |         |        | <b>767.40</b> |         |         |        |
| Y  | <b>475.33</b> | <b>503.32</b> |         |         |        | <b>654.32</b> |         |         |        |
| G  | 532.35        | <b>560.34</b> |         |         |        | <b>491.26</b> |         |         |        |
| A  | 603.39        | <b>631.38</b> |         |         |        | <b>434.24</b> |         |         |        |
| S  | 690.42        | 718.41        |         |         |        | <b>363.20</b> |         |         |        |
| T  | 791.47        | 819.46        |         |         |        | <b>276.17</b> |         |         |        |
| R  |               |               |         |         |        | <b>175.12</b> |         |         |        |





#19287468-1 NL: 1.29E6



---

| Reference                          |               |        |   | P    | Score | Coverage | Accession |     |       |       |
|------------------------------------|---------------|--------|---|------|-------|----------|-----------|-----|-------|-------|
| Scan(s)                            | Sequence      | MH+    | z | P    | XC    | DeltaCn  | Sp        | RSp | Ions  | Count |
| IPI:IPI00387097.1 SWISS-PROT:P0160 |               |        |   | 0.5  | 10.1  | 0.0      | 0         |     |       |       |
| 19287468 - 1                       | R.LLIYGASTR.A | 993.57 | 2 | 0.01 | 2.977 | 0.065    | 715.8     | 1   | 15/24 | 7     |

1 of 1 peptide matches reported, 0 removed due to filtering

DTA for scans: 19287468-1  
Precursor ion: 497.29  
Mass type: mono  
Mod's: (M\* +15.99492) C=161.01468

Ion series for charge: +1

| AA | A ions        | B ions        | B* ions | Bo ions | C ions | Y ions        | Y* ions | Yo ions | Z ions |
|----|---------------|---------------|---------|---------|--------|---------------|---------|---------|--------|
| L  | 86.10         | 114.09        |         |         |        |               |         |         |        |
| L  | <b>199.18</b> | <b>227.18</b> |         |         |        | <b>880.49</b> |         |         |        |
| I  | 312.26        | <b>340.26</b> |         |         |        | <b>767.40</b> |         |         |        |
| Y  | <b>475.33</b> | <b>503.32</b> |         |         |        | <b>654.32</b> |         |         |        |
| G  | 532.35        | <b>560.34</b> |         |         |        | <b>491.26</b> |         |         |        |
| A  | 603.39        | <b>631.38</b> |         |         |        | <b>434.24</b> |         |         |        |
| S  | 690.42        | 718.41        |         |         |        | <b>363.20</b> |         |         |        |
| T  | 791.47        | 819.46        |         |         |        | <b>276.17</b> |         |         |        |
| R  |               |               |         |         |        | <b>175.12</b> |         |         |        |



#19287468-1 NL: 1.29E6



---

| Reference                          |               |        |   | P    | Score | Coverage | Accession |     |       |       |
|------------------------------------|---------------|--------|---|------|-------|----------|-----------|-----|-------|-------|
| Scan(s)                            | Sequence      | MH+    | z | P    | XC    | DeltaCn  | Sp        | RSp | Ions  | Count |
| IPI:IPI00387119.1 SWISS-PROT:P0162 |               |        |   | 0.5  | 10.1  | 0.0      | 0         |     |       |       |
| 19287468 - 1                       | R.LLIYGASTR.A | 993.57 | 2 | 0.01 | 2.977 | 0.065    | 715.8     | 1   | 15/24 | 7     |

1 of 1 peptide matches reported, 0 removed due to filtering

DTA for scans: 19287468-1  
Precursor ion: 497.29  
Mass type: mono  
Mod's: (M\* +15.99492) C=161.01468

Ion series for charge: +1

| AA | A ions        | B ions        | B* ions | Bo ions | C ions | Y ions        | Y* ions | Yo ions | Z ions |
|----|---------------|---------------|---------|---------|--------|---------------|---------|---------|--------|
| L  | 86.10         | 114.09        |         |         |        |               |         |         |        |
| L  | <b>199.18</b> | <b>227.18</b> |         |         |        | <b>880.49</b> |         |         |        |
| I  | 312.26        | <b>340.26</b> |         |         |        | <b>767.40</b> |         |         |        |
| Y  | <b>475.33</b> | <b>503.32</b> |         |         |        | <b>654.32</b> |         |         |        |
| G  | 532.35        | <b>560.34</b> |         |         |        | <b>491.26</b> |         |         |        |
| A  | 603.39        | <b>631.38</b> |         |         |        | <b>434.24</b> |         |         |        |
| S  | 690.42        | 718.41        |         |         |        | <b>363.20</b> |         |         |        |
| T  | 791.47        | 819.46        |         |         |        | <b>276.17</b> |         |         |        |
| R  |               |               |         |         |        | <b>175.12</b> |         |         |        |



#19287468-1 NL: 1.29E6



---

| Reference                          |               |        | P | Score | Coverage | Accession |       |     |       |       |
|------------------------------------|---------------|--------|---|-------|----------|-----------|-------|-----|-------|-------|
| Scan(s)                            | Sequence      | MH+    | z | P     | XC       | DeltaCn   | Sp    | RSp | Ions  | Count |
| IPI:IPI00549330.4 TREMBL:Q9UL83 EN |               |        |   | 0.5   | 10.1     | 0.0       |       | 0   |       |       |
| 19287468 - 1                       | R.LLIYGASTR.A | 993.57 | 2 | 0.01  | 2.977    | 0.065     | 715.8 | 1   | 15/24 | 7     |

1 of 1 peptide matches reported, 0 removed due to filtering



DTA for scans: 19287468-1  
Precursor ion: 497.29  
Mass type: mono  
Mod's: (M\* +15.99492) C=161.01468

Ion series for charge: +1

| AA | A ions        | B ions        | B* ions | Bo ions | C ions | Y ions        | Y* ions | Yo ions | Z ions |
|----|---------------|---------------|---------|---------|--------|---------------|---------|---------|--------|
| L  | 86.10         | 114.09        |         |         |        |               |         |         |        |
| L  | <b>199.18</b> | <b>227.18</b> |         |         |        | <b>880.49</b> |         |         |        |
| I  | 312.26        | <b>340.26</b> |         |         |        | <b>767.40</b> |         |         |        |
| Y  | <b>475.33</b> | <b>503.32</b> |         |         |        | <b>654.32</b> |         |         |        |
| G  | 532.35        | <b>560.34</b> |         |         |        | <b>491.26</b> |         |         |        |
| A  | 603.39        | <b>631.38</b> |         |         |        | <b>434.24</b> |         |         |        |
| S  | 690.42        | 718.41        |         |         |        | <b>363.20</b> |         |         |        |
| T  | 791.47        | 819.46        |         |         |        | <b>276.17</b> |         |         |        |
| R  |               |               |         |         |        | <b>175.12</b> |         |         |        |



#19287468-1 NL: 1.29E6

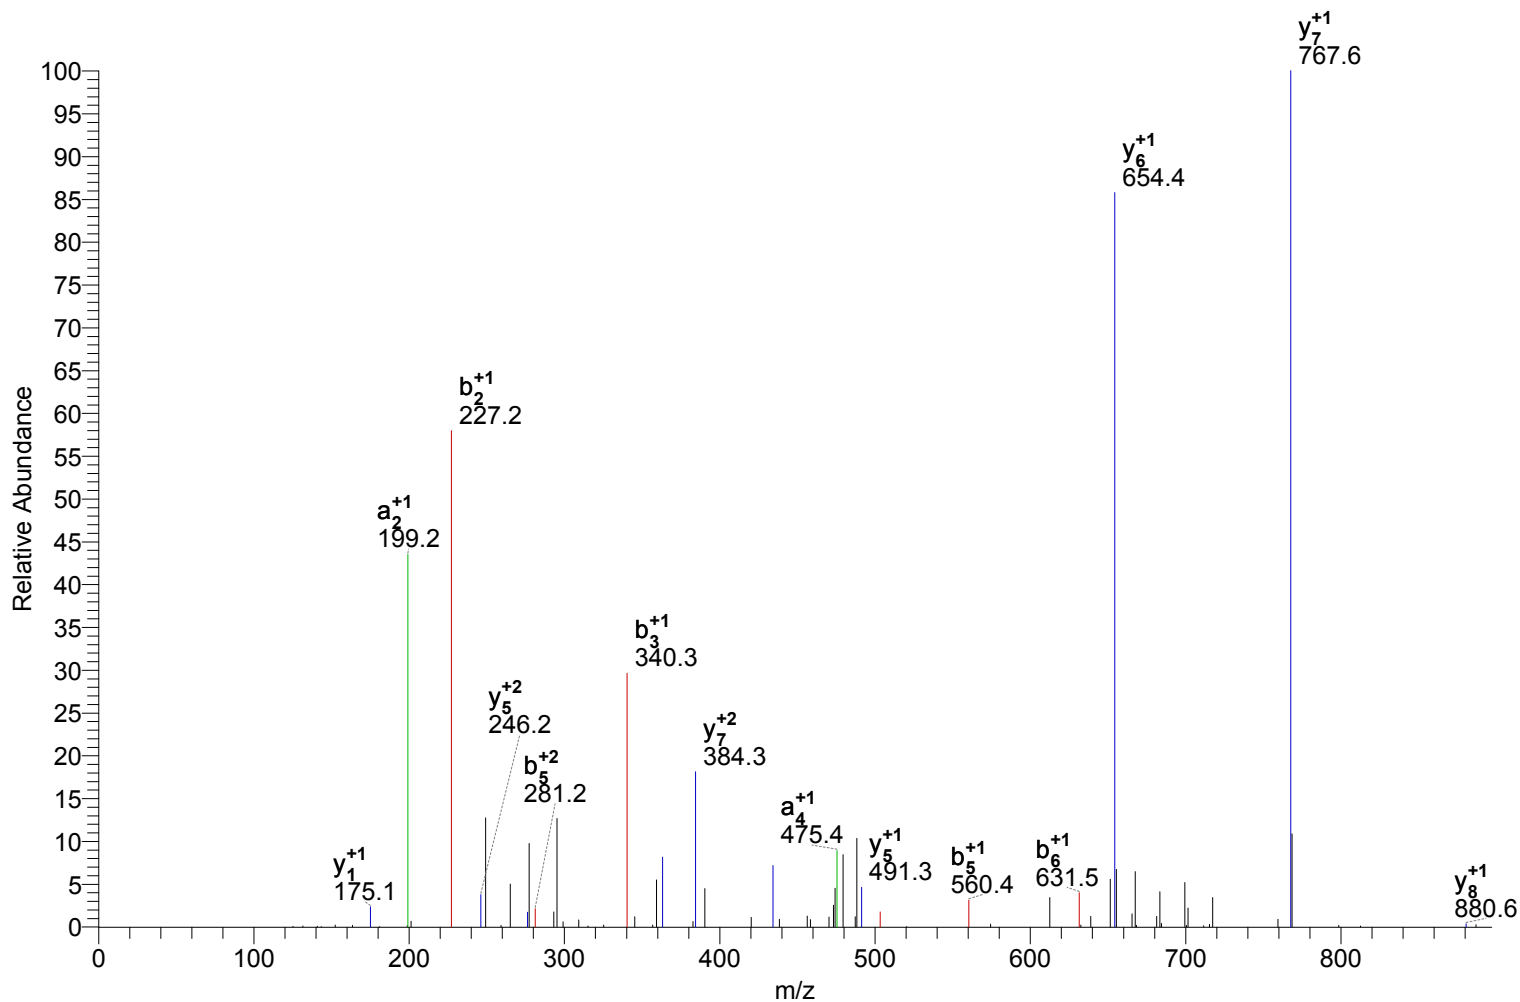

---

| Reference                          |               |        |   | P    | Score | Coverage | Accession |     |       |       |
|------------------------------------|---------------|--------|---|------|-------|----------|-----------|-----|-------|-------|
| Scan(s)                            | Sequence      | MH+    | z | P    | XC    | DeltaCn  | Sp        | RSp | Ions  | Count |
| IPI:IPI00829834.1 SWISS-PROT:P0443 |               |        |   | 0.5  | 10.1  | 0.0      | 0         |     |       |       |
| 19287468 - 1                       | R.LLIYGASTR.A | 993.57 | 2 | 0.01 | 2.977 | 0.065    | 715.8     | 1   | 15/24 | 7     |

1 of 1 peptide matches reported, 0 removed due to filtering

DTA for scans: 19287468-1  
Precursor ion: 497.29  
Mass type: mono  
Mod's: (M\* +15.99492) C=161.01468

Ion series for charge: +1

| AA | A ions        | B ions        | B* ions | Bo ions | C ions | Y ions        | Y* ions | Yo ions | Z ions |
|----|---------------|---------------|---------|---------|--------|---------------|---------|---------|--------|
| L  | 86.10         | 114.09        |         |         |        |               |         |         |        |
| L  | <b>199.18</b> | <b>227.18</b> |         |         |        | <b>880.49</b> |         |         |        |
| I  | 312.26        | <b>340.26</b> |         |         |        | <b>767.40</b> |         |         |        |
| Y  | <b>475.33</b> | <b>503.32</b> |         |         |        | <b>654.32</b> |         |         |        |
| G  | 532.35        | <b>560.34</b> |         |         |        | <b>491.26</b> |         |         |        |
| A  | 603.39        | <b>631.38</b> |         |         |        | <b>434.24</b> |         |         |        |
| S  | 690.42        | 718.41        |         |         |        | <b>363.20</b> |         |         |        |
| T  | 791.47        | 819.46        |         |         |        | <b>276.17</b> |         |         |        |
| R  |               |               |         |         |        | <b>175.12</b> |         |         |        |



#19287468-1 NL: 1.29E6



---

| Reference                          |               |        |   | P    | Score | Coverage | Accession |     |       |       |
|------------------------------------|---------------|--------|---|------|-------|----------|-----------|-----|-------|-------|
| Scan(s)                            | Sequence      | MH+    | z | P    | XC    | DeltaCn  | Sp        | RSp | Ions  | Count |
| IPI:IPI00892594.1 TREMBL:A6NGI0 EN |               |        |   | 0.5  | 10.1  | 0.0      | 0         |     |       |       |
| 19287468 - 1                       | R.LLIYGASTR.A | 993.57 | 2 | 0.01 | 2.977 | 0.065    | 715.8     | 1   | 15/24 | 7     |

1 of 1 peptide matches reported, 0 removed due to filtering

DTA for scans: 19287468-1  
Precursor ion: 497.29  
Mass type: mono  
Mod's: (M\* +15.99492) C=161.01468

Ion series for charge: +1

| AA | A ions        | B ions        | B* ions | Bo ions | C ions | Y ions        | Y* ions | Yo ions | Z ions |
|----|---------------|---------------|---------|---------|--------|---------------|---------|---------|--------|
| L  | 86.10         | 114.09        |         |         |        |               |         |         |        |
| L  | <b>199.18</b> | <b>227.18</b> |         |         |        | <b>880.49</b> |         |         |        |
| I  | 312.26        | <b>340.26</b> |         |         |        | <b>767.40</b> |         |         |        |
| Y  | <b>475.33</b> | <b>503.32</b> |         |         |        | <b>654.32</b> |         |         |        |
| G  | 532.35        | <b>560.34</b> |         |         |        | <b>491.26</b> |         |         |        |
| A  | 603.39        | <b>631.38</b> |         |         |        | <b>434.24</b> |         |         |        |
| S  | 690.42        | 718.41        |         |         |        | <b>363.20</b> |         |         |        |
| T  | 791.47        | 819.46        |         |         |        | <b>276.17</b> |         |         |        |
| R  |               |               |         |         |        | <b>175.12</b> |         |         |        |



#19287468-1 NL: 1.29E6





---

| Reference                          |               |        |   | P    | Score | Coverage | Accession |     |       |       |
|------------------------------------|---------------|--------|---|------|-------|----------|-----------|-----|-------|-------|
| Scan(s)                            | Sequence      | MH+    | z | P    | XC    | DeltaCn  | Sp        | RSp | Ions  | Count |
| IPI:IPI00936553.1 REFSEQ:XP_002345 |               |        |   | 0.5  | 10.1  | 0.0      | 0         |     |       |       |
| 19287468 - 1                       | R.LLIYGASTR.A | 993.57 | 2 | 0.01 | 2.977 | 0.065    | 715.8     | 1   | 15/24 | 7     |

---

1 of 1 peptide matches reported, 0 removed due to filtering

DTA for scans: 19287468-1  
Precursor ion: 497.29  
Mass type: mono  
Mod's: (M\* +15.99492) C=161.01468

Ion series for charge: +1

| AA | A ions        | B ions        | B* ions | Bo ions | C ions | Y ions        | Y* ions | Yo ions | Z ions |
|----|---------------|---------------|---------|---------|--------|---------------|---------|---------|--------|
| L  | 86.10         | 114.09        |         |         |        |               |         |         |        |
| L  | <b>199.18</b> | <b>227.18</b> |         |         |        | <b>880.49</b> |         |         |        |
| I  | 312.26        | <b>340.26</b> |         |         |        | <b>767.40</b> |         |         |        |
| Y  | <b>475.33</b> | <b>503.32</b> |         |         |        | <b>654.32</b> |         |         |        |
| G  | 532.35        | <b>560.34</b> |         |         |        | <b>491.26</b> |         |         |        |
| A  | 603.39        | <b>631.38</b> |         |         |        | <b>434.24</b> |         |         |        |
| S  | 690.42        | 718.41        |         |         |        | <b>363.20</b> |         |         |        |
| T  | 791.47        | 819.46        |         |         |        | <b>276.17</b> |         |         |        |
| R  |               |               |         |         |        | <b>175.12</b> |         |         |        |



#19287468-1 NL: 1.29E6



---

| Reference                                                     |          |        |   | P    | Score | Coverage | Accession |     |       |       |
|---------------------------------------------------------------|----------|--------|---|------|-------|----------|-----------|-----|-------|-------|
| Scan(s)                                                       | Sequence | MH+    | z | P    | XC    | DeltaCn  | Sp        | RSp | Ions  | Count |
| IPI:IPI00387116.1 SWISS-PROT:P01621 Tax_Id=9606 Gene_Symbol=- |          |        |   | 0.5  | 8.1   | 0.0      |           | 0   |       |       |
| 19287468 - 1 R.LLIYGATSR.A                                    |          | 993.57 | 2 | 0.01 | 2.784 | 0.369    | 580.4     | 2   | 14/24 |       |

1 of 1 peptide matches reported, 0 removed due to filtering

DTA for scans: 19287468-1  
Precursor ion: 497.29  
Mass type: mono  
Mod's: (M\* +15.99492) C=161.01468

Ion series for charge: +1

| AA | A ions        | B ions        | B* ions | Bo ions | C ions | Y ions        | Y* ions | Yo ions | Z ions |
|----|---------------|---------------|---------|---------|--------|---------------|---------|---------|--------|
| L  | 86.10         | 114.09        |         |         |        |               |         |         |        |
| L  | <b>199.18</b> | <b>227.18</b> |         |         |        | <b>880.49</b> |         |         |        |
| I  | 312.26        | <b>340.26</b> |         |         |        | <b>767.40</b> |         |         |        |
| Y  | <b>475.33</b> | <b>503.32</b> |         |         |        | <b>654.32</b> |         |         |        |
| G  | 532.35        | <b>560.34</b> |         |         |        | <b>491.26</b> |         |         |        |
| A  | 603.39        | <b>631.38</b> |         |         |        | <b>434.24</b> |         |         |        |
| T  | 704.43        | 732.43        |         |         |        | <b>363.20</b> |         |         |        |
| S  | 791.47        | 819.46        |         |         |        | 262.15        |         |         |        |
| R  |               |               |         |         |        | <b>175.12</b> |         |         |        |

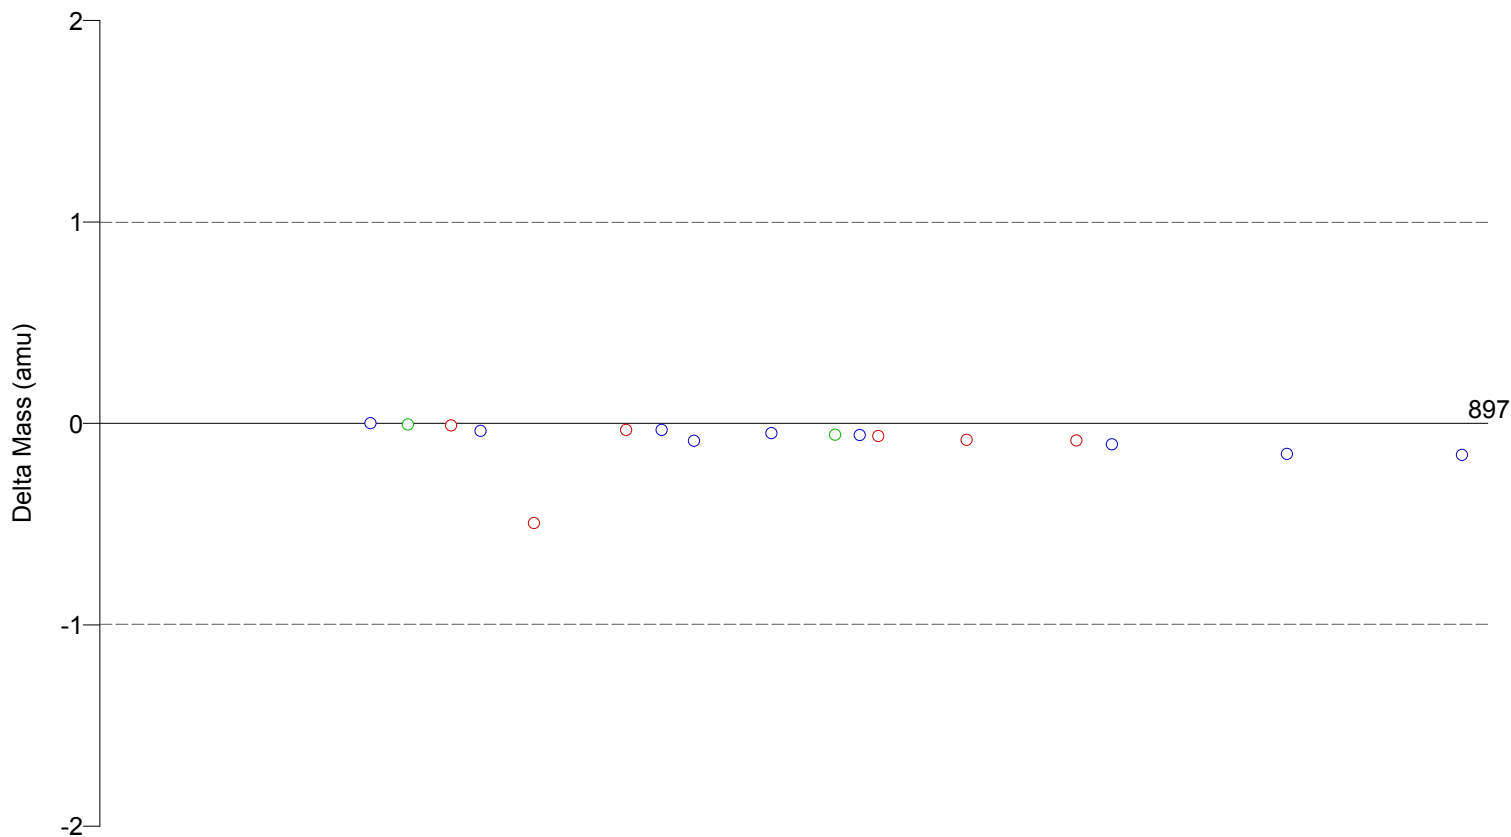

#19287468-1 NL: 1.29E6

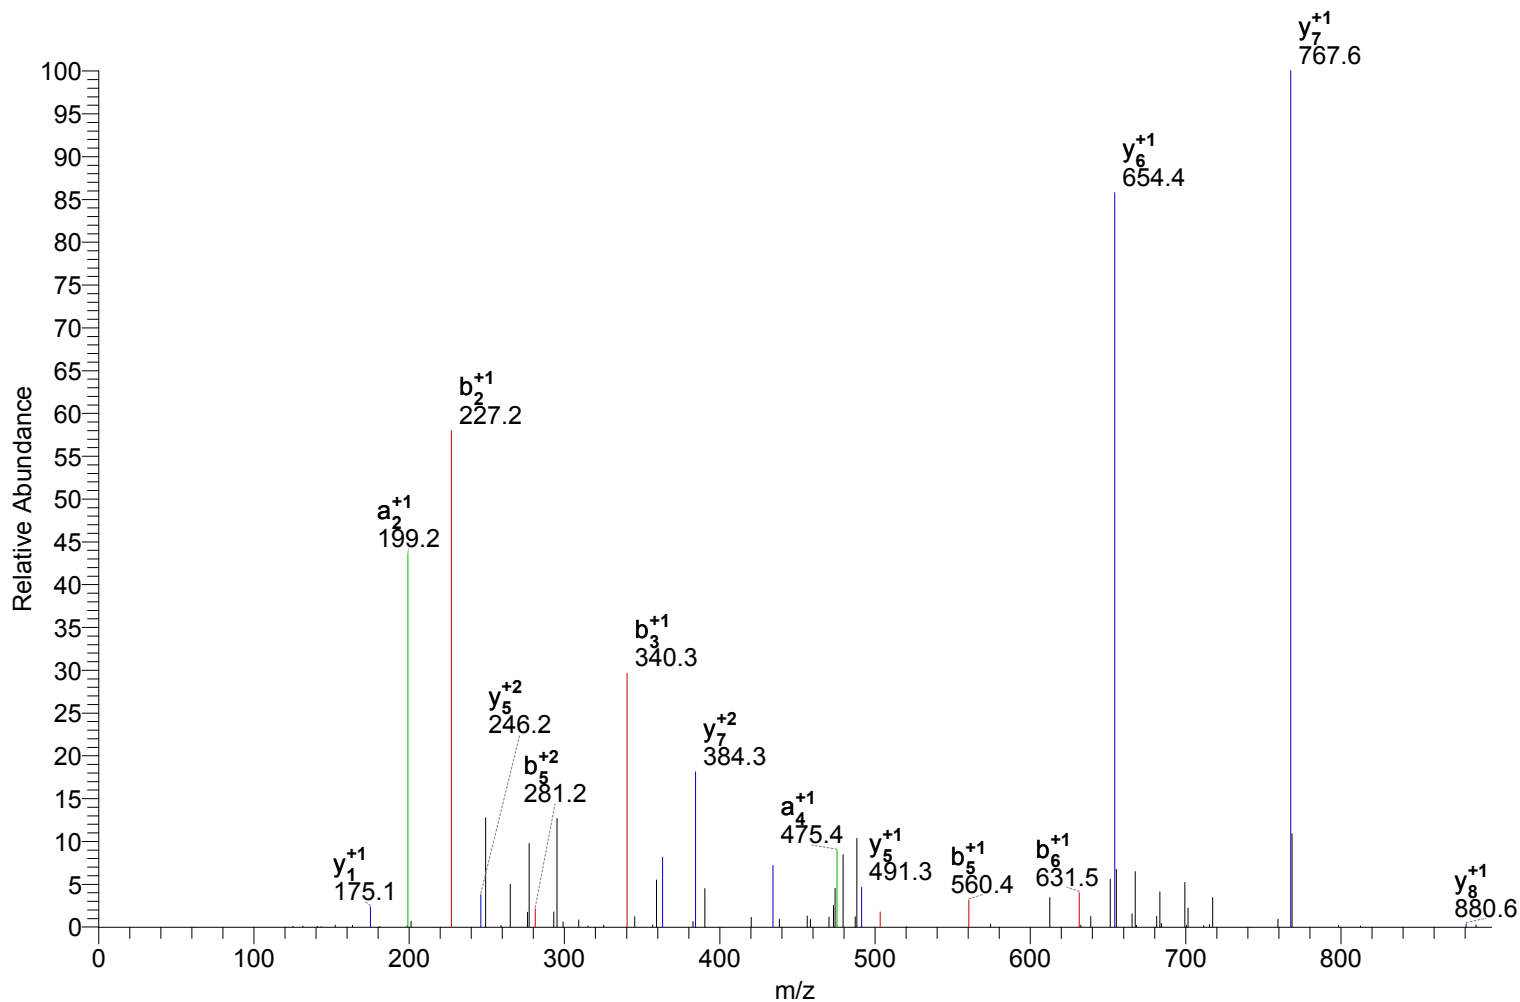

---

| Reference                                                      |                 |         |   | P    | Score | Coverage | Accession |     |       |       |
|----------------------------------------------------------------|-----------------|---------|---|------|-------|----------|-----------|-----|-------|-------|
| Scan(s)                                                        | Sequence        | MH+     | z | P    | XC    | DeltaCn  | Sp        | RSp | Ions  | Count |
| IPI:IPI00022488.1 SWISS-PROT:P02790 TREMBL:Q9BS19 ENSEMBL:ENSP |                 |         |   | 0.6  | 18.1  | 0.0      | 0         |     |       |       |
| 19287468 - 1                                                   | R.LHIMAGR.R     | 797.45  | 2 | 0.07 | 2.141 | 0.129    | 350.3     | 1   | 10/18 |       |
| 19287468 - 1                                                   | K.NFPSPVDAAFR.Q | 1220.61 | 2 | 0.01 | 2.871 | 0.432    | 324.9     | 1   | 16/30 | 1     |

2 of 2 peptide matches reported, 0 removed due to filtering

DTA for scans: 19287468-1  
Precursor ion: 399.23  
Mass type: mono  
Mod's: (M\* +15.99492) C=161.01468

Ion series for charge: +1

| AA | A ions        | B ions        | B* ions | Bo ions | C ions | Y ions        | Y* ions | Yo ions | Z ions |
|----|---------------|---------------|---------|---------|--------|---------------|---------|---------|--------|
| L  | 86.10         | 114.09        |         |         |        |               |         |         |        |
| H  | <b>223.16</b> | <b>251.15</b> |         |         |        | <b>684.36</b> |         |         |        |
| I  | 336.24        | <b>364.23</b> |         |         |        | <b>547.30</b> |         |         |        |
| M  | 467.28        | <b>495.27</b> |         |         |        | <b>434.22</b> |         |         |        |
| A  | 538.32        | <b>566.31</b> |         |         |        | <b>303.18</b> |         |         |        |
| G  | 595.34        | 623.33        |         |         |        | <b>232.14</b> |         |         |        |
| R  |               |               |         |         |        | 175.12        |         |         |        |



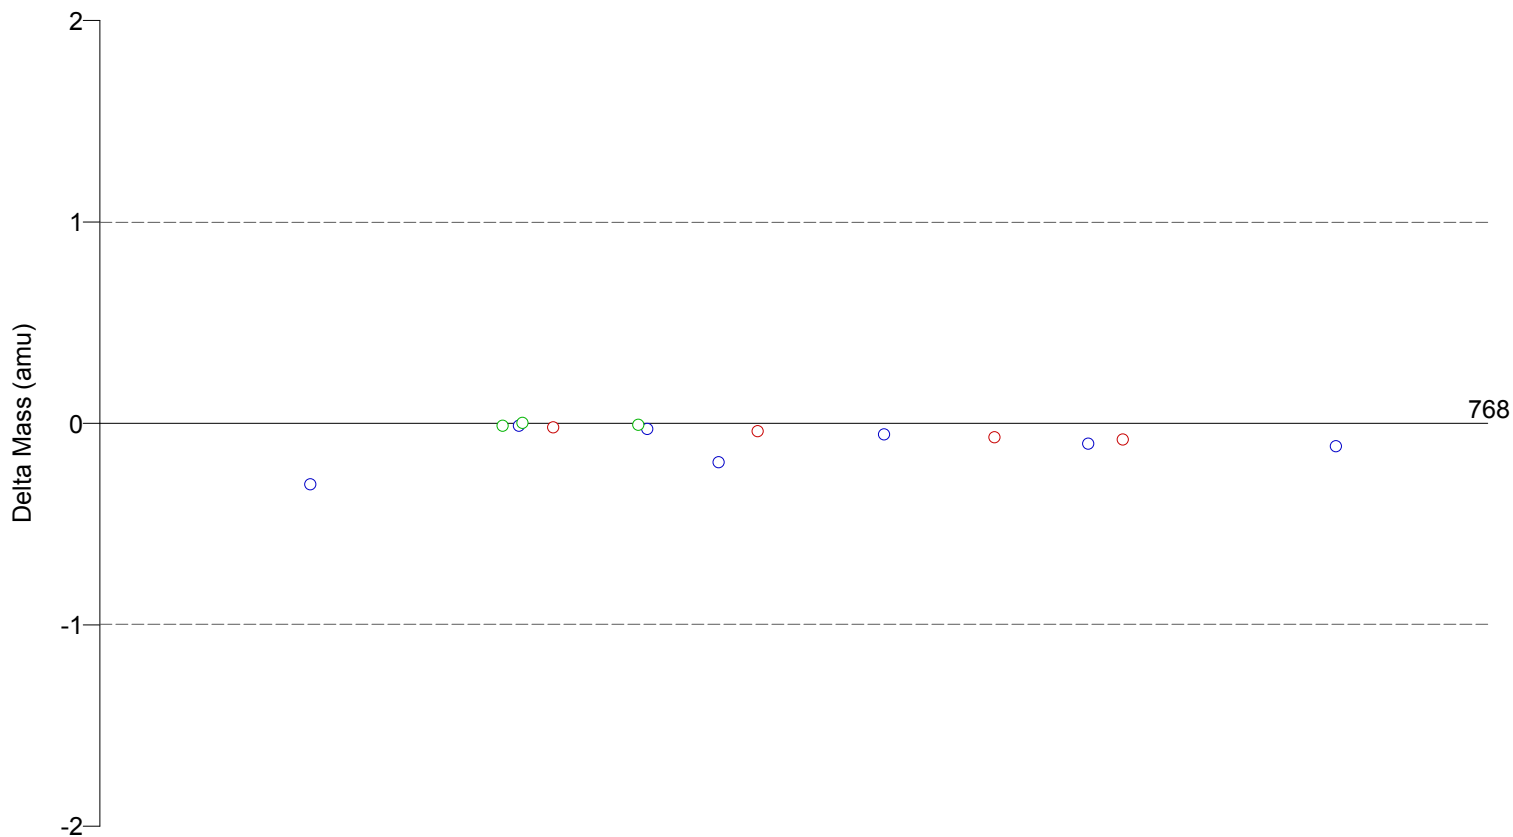

#19287468-1 NL: 3.32E5

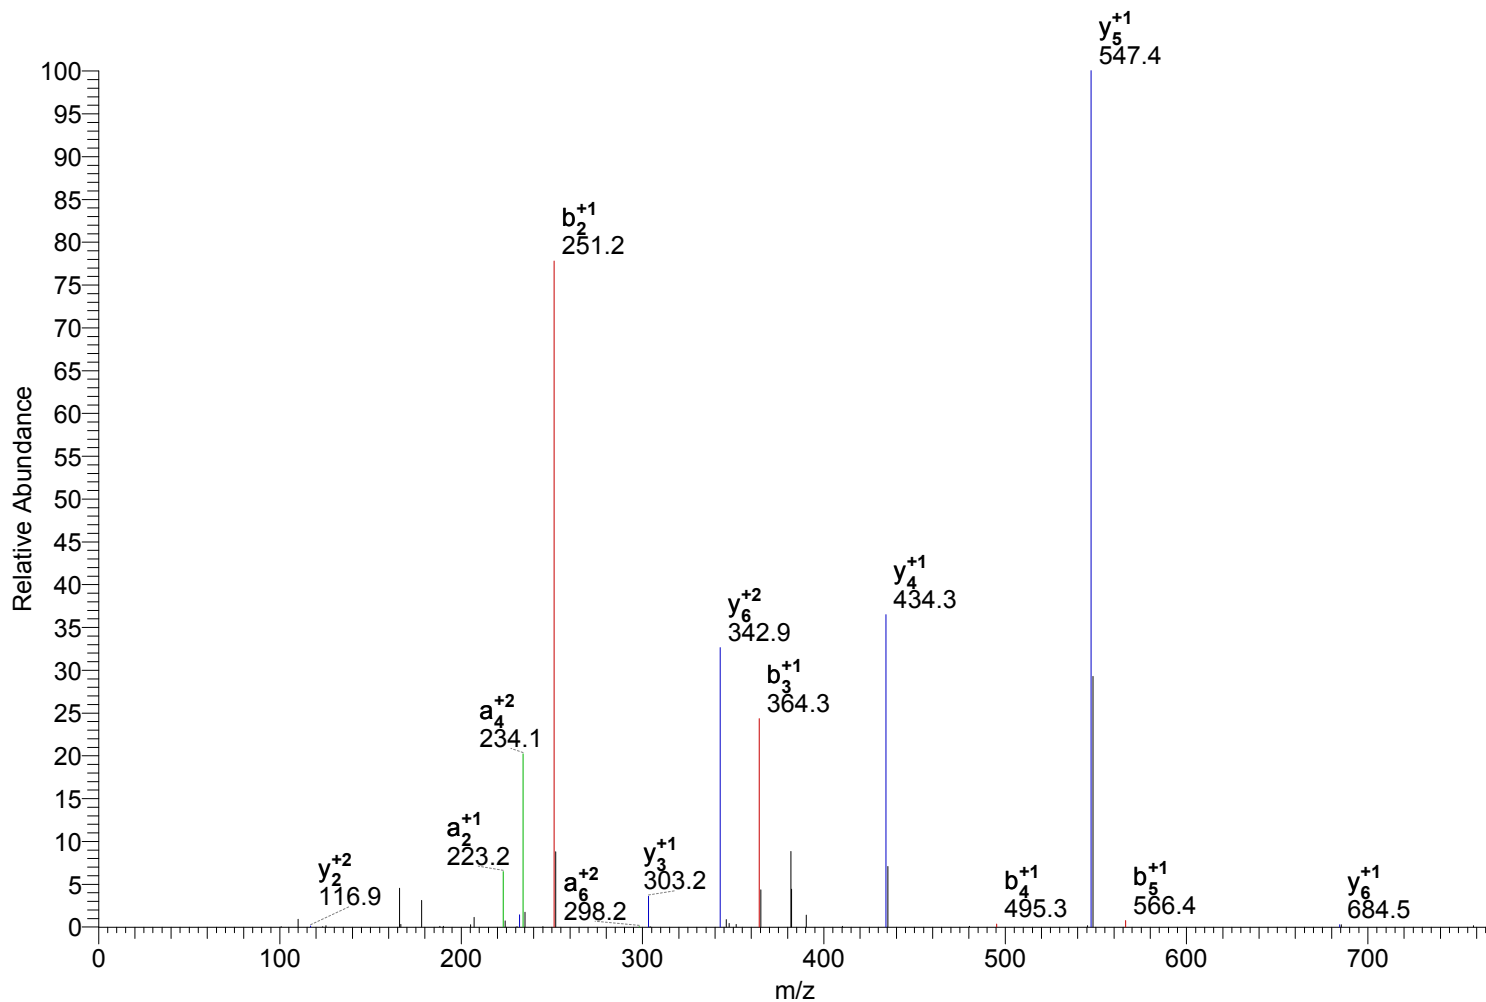

DTA for scans: 19287468-1  
Precursor ion: 610.81  
Mass type: mono  
Mod's: (M\* +15.99492) C=161.01468

Ion series for charge: +1

| AA | A ions        | B ions        | B* ions | Bo ions | C ions | Y ions        | Y* ions | Yo ions | Z ions |
|----|---------------|---------------|---------|---------|--------|---------------|---------|---------|--------|
| N  | 87.06         | 115.05        |         |         |        |               |         |         |        |
| F  | <b>234.12</b> | <b>262.12</b> |         |         |        | 1106.56       |         |         |        |
| P  | 331.18        | <b>359.17</b> |         |         |        | <b>959.49</b> |         |         |        |
| S  | 418.21        | 446.20        |         |         |        | <b>862.44</b> |         |         |        |
| P  | 515.26        | 543.26        |         |         |        | <b>775.41</b> |         |         |        |
| V  | <b>614.33</b> | 642.32        |         |         |        | <b>678.36</b> |         |         |        |
| D  | 729.36        | 757.35        |         |         |        | <b>579.29</b> |         |         |        |
| A  | 800.39        | 828.39        |         |         |        | <b>464.26</b> |         |         |        |
| A  | 871.43        | 899.43        |         |         |        | <b>393.22</b> |         |         |        |
| F  | 1018.50       | 1046.49       |         |         |        | <b>322.19</b> |         |         |        |
| R  |               |               |         |         |        | <b>175.12</b> |         |         |        |

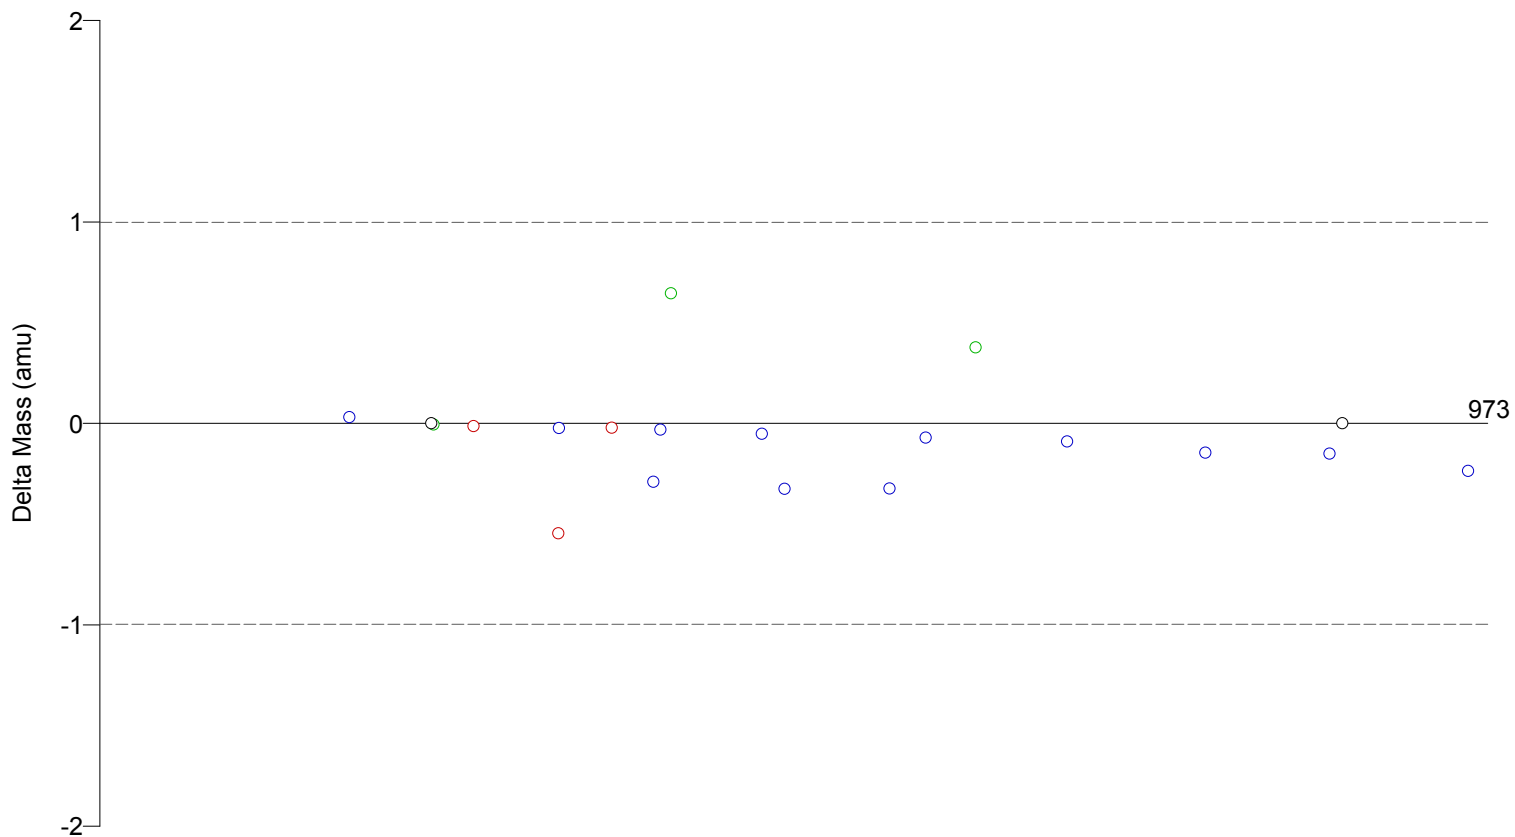

#19287468-1 NL: 1.83E6

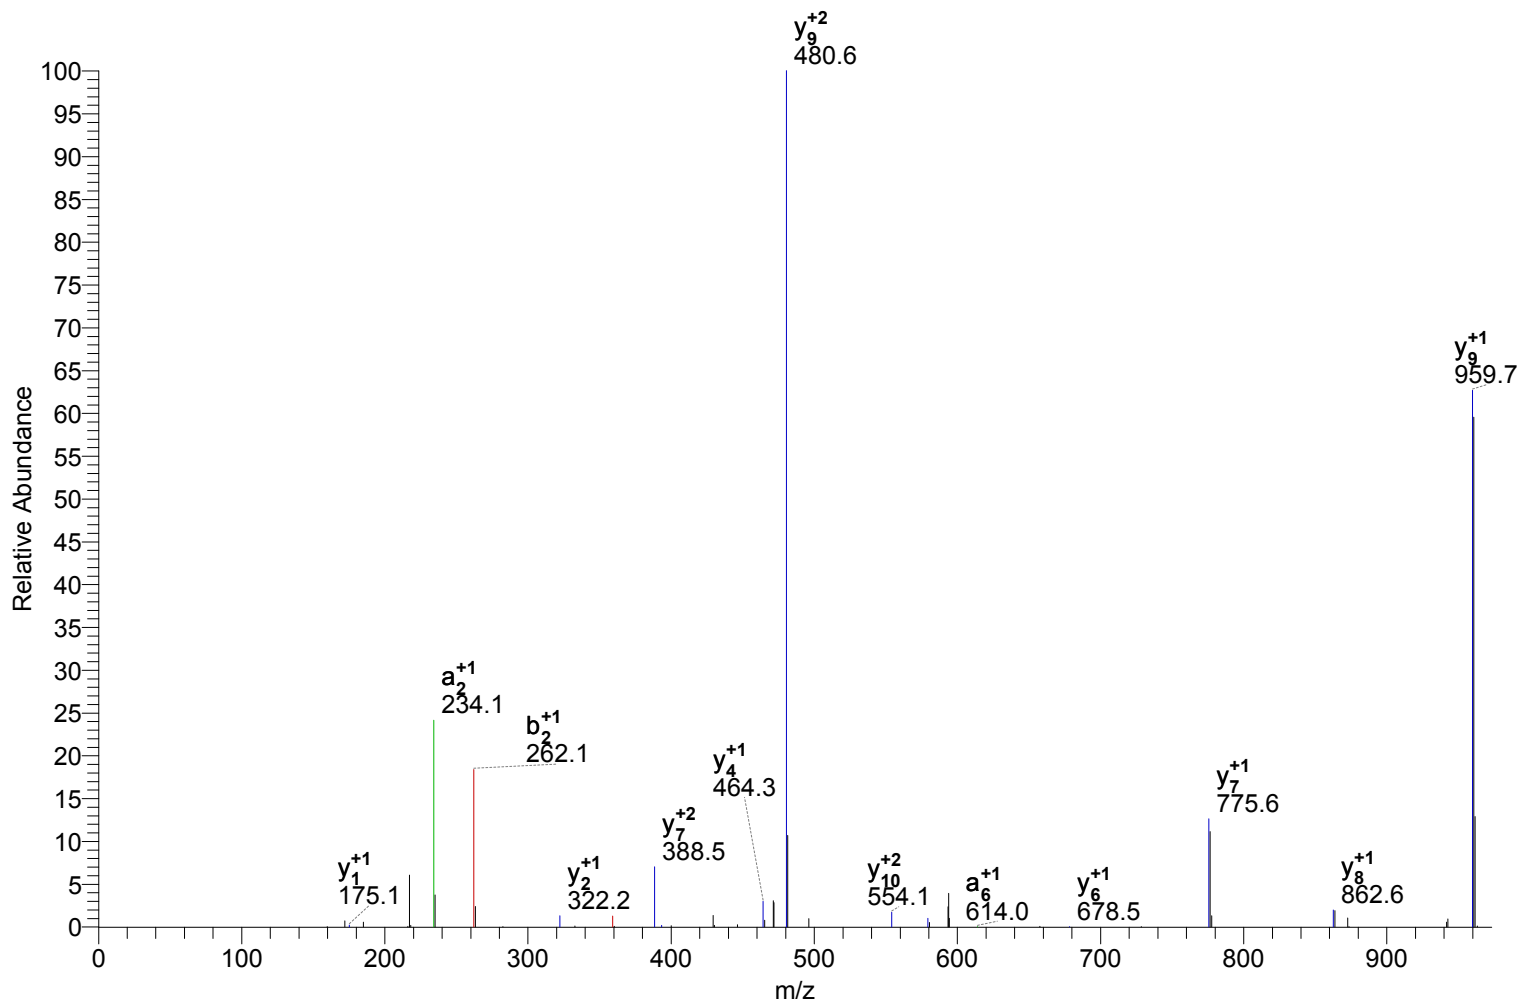

---

| Reference                          |                 |         |   | P    | Score | Coverage | Accession |     |       |       |
|------------------------------------|-----------------|---------|---|------|-------|----------|-----------|-----|-------|-------|
| Scan(s)                            | Sequence        | MH+     | z | P    | XC    | DeltaCn  | Sp        | RSp | Ions  | Count |
| IPI:IPI00922564.1 TREMBL:B7Z8Q4 Ta |                 |         |   | 0.6  | 10.1  | 0.0      | 0         |     |       |       |
| 19287468 - 1                       | K.NFPSPVDAAFR.Q | 1220.61 | 2 | 0.01 | 2.871 | 0.432    | 324.9     | 1   | 16/30 | 1     |

1 of 1 peptide matches reported, 0 removed due to filtering

DTA for scans: 19287468-1  
Precursor ion: 610.81  
Mass type: mono  
Mod's: (M\* +15.99492) C=161.01468

Ion series for charge: +1

| AA | A ions        | B ions        | B* ions | Bo ions | C ions | Y ions        | Y* ions | Yo ions | Z ions |
|----|---------------|---------------|---------|---------|--------|---------------|---------|---------|--------|
| N  | 87.06         | 115.05        |         |         |        |               |         |         |        |
| F  | <b>234.12</b> | <b>262.12</b> |         |         |        | 1106.56       |         |         |        |
| P  | 331.18        | <b>359.17</b> |         |         |        | <b>959.49</b> |         |         |        |
| S  | 418.21        | 446.20        |         |         |        | <b>862.44</b> |         |         |        |
| P  | 515.26        | 543.26        |         |         |        | <b>775.41</b> |         |         |        |
| V  | <b>614.33</b> | 642.32        |         |         |        | <b>678.36</b> |         |         |        |
| D  | 729.36        | 757.35        |         |         |        | <b>579.29</b> |         |         |        |
| A  | 800.39        | 828.39        |         |         |        | <b>464.26</b> |         |         |        |
| A  | 871.43        | 899.43        |         |         |        | <b>393.22</b> |         |         |        |
| F  | 1018.50       | 1046.49       |         |         |        | <b>322.19</b> |         |         |        |
| R  |               |               |         |         |        | <b>175.12</b> |         |         |        |



#19287468-1 NL: 1.83E6



---

| Reference                                                      |                |         |   | P    | Score | Coverage | Accession |     |       |       |
|----------------------------------------------------------------|----------------|---------|---|------|-------|----------|-----------|-----|-------|-------|
| Scan(s)                                                        | Sequence       | MH+     | z | P    | XC    | DeltaCn  | Sp        | RSp | Ions  | Count |
| IPI:IPI00027507.1 SWISS-PROT:Q02985 ENSEMBL:ENSP00000356395 RE |                |         |   | 0.8  | 10.2  | 0.0      | 0         |     |       |       |
| 19287468 - 1                                                   | R.RPYFPVAVGK.Y | 1133.65 | 2 | 0.02 | 3.852 | 0.322    | 1065.5    | 1   | 18/27 | 6     |

1 of 1 peptide matches reported, 0 removed due to filtering

DTA for scans: 19287468-1  
Precursor ion: 567.33  
Mass type: mono  
Mod's: (M\* +15.99492) C=161.01468

Ion series for charge: +1

| AA | A ions        | B ions        | B* ions | Bo ions | C ions | Y ions        | Y* ions | Yo ions | Z ions |
|----|---------------|---------------|---------|---------|--------|---------------|---------|---------|--------|
| R  | 129.11        | 157.11        |         |         |        |               |         |         |        |
| P  | 226.17        | <b>254.16</b> |         |         |        | <b>977.55</b> |         |         |        |
| Y  | 389.23        | <b>417.22</b> |         |         |        | <b>880.49</b> |         |         |        |
| F  | <b>536.30</b> | 564.29        |         |         |        | <b>717.43</b> |         |         |        |
| P  | 633.35        | 661.35        |         |         |        | <b>570.36</b> |         |         |        |
| V  | <b>732.42</b> | <b>760.41</b> |         |         |        | 473.31        |         |         |        |
| A  | <b>803.46</b> | <b>831.45</b> |         |         |        | <b>374.24</b> |         |         |        |
| V  | <b>902.52</b> | <b>930.52</b> |         |         |        | <b>303.20</b> |         |         |        |
| G  | 959.55        | <b>987.54</b> |         |         |        | <b>204.13</b> |         |         |        |
| K  |               |               |         |         |        | 147.11        |         |         |        |





#19287468-1 NL: 2.96E5



---

| Reference                          |                |         |   | P    | Score | Coverage | Accession |     |       |       |
|------------------------------------|----------------|---------|---|------|-------|----------|-----------|-----|-------|-------|
| Scan(s)                            | Sequence       | MH+     | z | P    | XC    | DeltaCn  | Sp        | RSp | Ions  | Count |
| IPI:IPI00218999.2 SWISS-PROT:P0860 |                |         |   | 0.8  | 10.2  | 0.0      |           | 0   |       |       |
| 19287468 - 1                       | R.RPYFPVAVGK.Y | 1133.65 | 2 | 0.02 | 3.852 | 0.322    | 1065.5    | 1   | 18/27 | 6     |

1 of 1 peptide matches reported, 0 removed due to filtering

DTA for scans: 19287468-1  
Precursor ion: 567.33  
Mass type: mono  
Mod's: (M\* +15.99492) C=161.01468

Ion series for charge: +1

| AA | A ions        | B ions        | B* ions | Bo ions | C ions | Y ions        | Y* ions | Yo ions | Z ions |
|----|---------------|---------------|---------|---------|--------|---------------|---------|---------|--------|
| R  | 129.11        | 157.11        |         |         |        |               |         |         |        |
| P  | 226.17        | <b>254.16</b> |         |         |        | <b>977.55</b> |         |         |        |
| Y  | 389.23        | <b>417.22</b> |         |         |        | <b>880.49</b> |         |         |        |
| F  | <b>536.30</b> | 564.29        |         |         |        | <b>717.43</b> |         |         |        |
| P  | 633.35        | 661.35        |         |         |        | <b>570.36</b> |         |         |        |
| V  | <b>732.42</b> | <b>760.41</b> |         |         |        | 473.31        |         |         |        |
| A  | <b>803.46</b> | <b>831.45</b> |         |         |        | <b>374.24</b> |         |         |        |
| V  | <b>902.52</b> | <b>930.52</b> |         |         |        | <b>303.20</b> |         |         |        |
| G  | 959.55        | <b>987.54</b> |         |         |        | <b>204.13</b> |         |         |        |
| K  |               |               |         |         |        | 147.11        |         |         |        |



#19287468-1 NL: 2.96E5



---

| Reference                          |                |         |   | P    | Score | Coverage | Accession |     |       |       |
|------------------------------------|----------------|---------|---|------|-------|----------|-----------|-----|-------|-------|
| Scan(s)                            | Sequence       | MH+     | z | P    | XC    | DeltaCn  | Sp        | RSp | Ions  | Count |
| IPI:IPI00515041.5 TREMBL:A8MPQ4;Q5 |                |         |   | 0.8  | 10.2  | 0.0      |           | 0   |       |       |
| 19287468 - 1                       | R.RPYFPVAVGK.Y | 1133.65 | 2 | 0.02 | 3.852 | 0.322    | 1065.5    | 1   | 18/27 | 6     |

1 of 1 peptide matches reported, 0 removed due to filtering

DTA for scans: 19287468-1  
Precursor ion: 567.33  
Mass type: mono  
Mod's: (M\* +15.99492) C=161.01468

Ion series for charge: +1

| AA | A ions        | B ions        | B* ions | Bo ions | C ions | Y ions        | Y* ions | Yo ions | Z ions |
|----|---------------|---------------|---------|---------|--------|---------------|---------|---------|--------|
| R  | 129.11        | 157.11        |         |         |        |               |         |         |        |
| P  | 226.17        | <b>254.16</b> |         |         |        | <b>977.55</b> |         |         |        |
| Y  | 389.23        | <b>417.22</b> |         |         |        | <b>880.49</b> |         |         |        |
| F  | <b>536.30</b> | 564.29        |         |         |        | <b>717.43</b> |         |         |        |
| P  | 633.35        | 661.35        |         |         |        | <b>570.36</b> |         |         |        |
| V  | <b>732.42</b> | <b>760.41</b> |         |         |        | 473.31        |         |         |        |
| A  | <b>803.46</b> | <b>831.45</b> |         |         |        | <b>374.24</b> |         |         |        |
| V  | <b>902.52</b> | <b>930.52</b> |         |         |        | <b>303.20</b> |         |         |        |
| G  | 959.55        | <b>987.54</b> |         |         |        | <b>204.13</b> |         |         |        |
| K  |               |               |         |         |        | 147.11        |         |         |        |



#19287468-1 NL: 2.96E5



---

| Reference                          |                |         |   | P    | Score | Coverage | Accession |     |       |       |
|------------------------------------|----------------|---------|---|------|-------|----------|-----------|-----|-------|-------|
| Scan(s)                            | Sequence       | MH+     | z | P    | XC    | DeltaCn  | Sp        | RSp | Ions  | Count |
| IPI:IPI00654723.1 TREMBL:BlAKF8;Q8 |                |         |   | 0.8  | 10.2  | 0.0      |           | 0   |       |       |
| 19287468 - 1                       | R.RPYFPVAVGK.Y | 1133.65 | 2 | 0.02 | 3.852 | 0.322    | 1065.5    | 1   | 18/27 | 6     |

1 of 1 peptide matches reported, 0 removed due to filtering



DTA for scans: 19287468-1  
Precursor ion: 567.33  
Mass type: mono  
Mod's: (M\* +15.99492) C=161.01468

Ion series for charge: +1

| AA | A ions        | B ions        | B* ions | Bo ions | C ions | Y ions        | Y* ions | Yo ions | Z ions |
|----|---------------|---------------|---------|---------|--------|---------------|---------|---------|--------|
| R  | 129.11        | 157.11        |         |         |        |               |         |         |        |
| P  | 226.17        | <b>254.16</b> |         |         |        | <b>977.55</b> |         |         |        |
| Y  | 389.23        | <b>417.22</b> |         |         |        | <b>880.49</b> |         |         |        |
| F  | <b>536.30</b> | 564.29        |         |         |        | <b>717.43</b> |         |         |        |
| P  | 633.35        | 661.35        |         |         |        | <b>570.36</b> |         |         |        |
| V  | <b>732.42</b> | <b>760.41</b> |         |         |        | 473.31        |         |         |        |
| A  | <b>803.46</b> | <b>831.45</b> |         |         |        | <b>374.24</b> |         |         |        |
| V  | <b>902.52</b> | <b>930.52</b> |         |         |        | <b>303.20</b> |         |         |        |
| G  | 959.55        | <b>987.54</b> |         |         |        | <b>204.13</b> |         |         |        |
| K  |               |               |         |         |        | 147.11        |         |         |        |



#19287468-1 NL: 2.96E5



---

| Reference                          |                |         |   | P    | Score | Coverage | Accession |     |       |       |
|------------------------------------|----------------|---------|---|------|-------|----------|-----------|-----|-------|-------|
| Scan(s)                            | Sequence       | MH+     | z | P    | XC    | DeltaCn  | Sp        | RSp | Ions  | Count |
| IPI:IPI00844262.1 TREMBL:Q6NSD3 EN |                |         |   | 0.8  | 10.2  | 0.0      |           | 0   |       |       |
| 19287468 - 1                       | R.RPYFPVAVGK.Y | 1133.65 | 2 | 0.02 | 3.852 | 0.322    | 1065.5    | 1   | 18/27 | 6     |

1 of 1 peptide matches reported, 0 removed due to filtering

DTA for scans: 19287468-1  
Precursor ion: 567.33  
Mass type: mono  
Mod's: (M\* +15.99492) C=161.01468

Ion series for charge: +1

| AA | A ions        | B ions        | B* ions | Bo ions | C ions | Y ions        | Y* ions | Yo ions | Z ions |
|----|---------------|---------------|---------|---------|--------|---------------|---------|---------|--------|
| R  | 129.11        | 157.11        |         |         |        |               |         |         |        |
| P  | 226.17        | <b>254.16</b> |         |         |        | <b>977.55</b> |         |         |        |
| Y  | 389.23        | <b>417.22</b> |         |         |        | <b>880.49</b> |         |         |        |
| F  | <b>536.30</b> | 564.29        |         |         |        | <b>717.43</b> |         |         |        |
| P  | 633.35        | 661.35        |         |         |        | <b>570.36</b> |         |         |        |
| V  | <b>732.42</b> | <b>760.41</b> |         |         |        | 473.31        |         |         |        |
| A  | <b>803.46</b> | <b>831.45</b> |         |         |        | <b>374.24</b> |         |         |        |
| V  | <b>902.52</b> | <b>930.52</b> |         |         |        | <b>303.20</b> |         |         |        |
| G  | 959.55        | <b>987.54</b> |         |         |        | <b>204.13</b> |         |         |        |
| K  |               |               |         |         |        | 147.11        |         |         |        |



#19287468-1 NL: 2.96E5



---

| Reference                          |                |         |   | P    | Score | Coverage | Accession |     |       |       |
|------------------------------------|----------------|---------|---|------|-------|----------|-----------|-----|-------|-------|
| Scan(s)                            | Sequence       | MH+     | z | P    | XC    | DeltaCn  | Sp        | RSp | Ions  | Count |
| IPI:IPI00908535.1 TREMBL:B4DPR0 Ta |                |         |   | 0.8  | 10.2  | 0.0      |           | 0   |       |       |
| 19287468 - 1                       | R.RPYFPVAVGK.Y | 1133.65 | 2 | 0.02 | 3.852 | 0.322    | 1065.5    | 1   | 18/27 | 6     |

1 of 1 peptide matches reported, 0 removed due to filtering

DTA for scans: 19287468-1  
Precursor ion: 567.33  
Mass type: mono  
Mod's: (M\* +15.99492) C=161.01468

Ion series for charge: +1

| AA | A ions        | B ions        | B* ions | Bo ions | C ions | Y ions        | Y* ions | Yo ions | Z ions |
|----|---------------|---------------|---------|---------|--------|---------------|---------|---------|--------|
| R  | 129.11        | 157.11        |         |         |        |               |         |         |        |
| P  | 226.17        | <b>254.16</b> |         |         |        | <b>977.55</b> |         |         |        |
| Y  | 389.23        | <b>417.22</b> |         |         |        | <b>880.49</b> |         |         |        |
| F  | <b>536.30</b> | 564.29        |         |         |        | <b>717.43</b> |         |         |        |
| P  | 633.35        | 661.35        |         |         |        | <b>570.36</b> |         |         |        |
| V  | <b>732.42</b> | <b>760.41</b> |         |         |        | 473.31        |         |         |        |
| A  | <b>803.46</b> | <b>831.45</b> |         |         |        | <b>374.24</b> |         |         |        |
| V  | <b>902.52</b> | <b>930.52</b> |         |         |        | <b>303.20</b> |         |         |        |
| G  | 959.55        | <b>987.54</b> |         |         |        | <b>204.13</b> |         |         |        |
| K  |               |               |         |         |        | 147.11        |         |         |        |



#19287468-1 NL: 2.96E5





---

| Reference                          |                  |         |   | P    | Score | Coverage | Accession |     |       |       |
|------------------------------------|------------------|---------|---|------|-------|----------|-----------|-----|-------|-------|
| Scan(s)                            | Sequence         | MH+     | z | P    | XC    | DeltaCn  | Sp        | RSp | Ions  | Count |
| IPI:IPI00876888.1 TREMBL:A8K008 Ta |                  |         |   | 0.8  | 20.1  | 0.0      | 0         |     |       |       |
| 19287468 - 1                       | K.GLEWVGR.I      | 816.44  | 2 | 0.4  | 2.817 | 0.203    | 839.1     | 1   | 13/18 | 8     |
| 2118291816 -                       | K.GPSVFPLAPSSK.S | 1186.65 | 2 | 0.02 | 2.948 | 0.348    | 465.0     | 1   | 15/33 | 14    |

2 of 2 peptide matches reported, 0 removed due to filtering

DTA for scans: 19287468-1  
Precursor ion: 408.72  
Mass type: mono  
Mod's: (M\* +15.99492) C=161.01468

Ion series for charge: +1

| AA | A ions        | B ions        | B* ions | Bo ions | C ions | Y ions        | Y* ions | Yo ions | Z ions |
|----|---------------|---------------|---------|---------|--------|---------------|---------|---------|--------|
| G  | 30.03         | 58.03         |         |         |        |               |         |         |        |
| L  | <b>143.12</b> | <b>171.11</b> |         |         |        | 759.41        |         |         |        |
| E  | 272.16        | <b>300.16</b> |         |         |        | <b>646.33</b> |         |         |        |
| W  | <b>458.24</b> | <b>486.23</b> |         |         |        | <b>517.29</b> |         |         |        |
| V  | 557.31        | <b>585.30</b> |         |         |        | <b>331.21</b> |         |         |        |
| G  | 614.33        | <b>642.32</b> |         |         |        | <b>232.14</b> |         |         |        |
| R  |               |               |         |         |        | <b>175.12</b> |         |         |        |

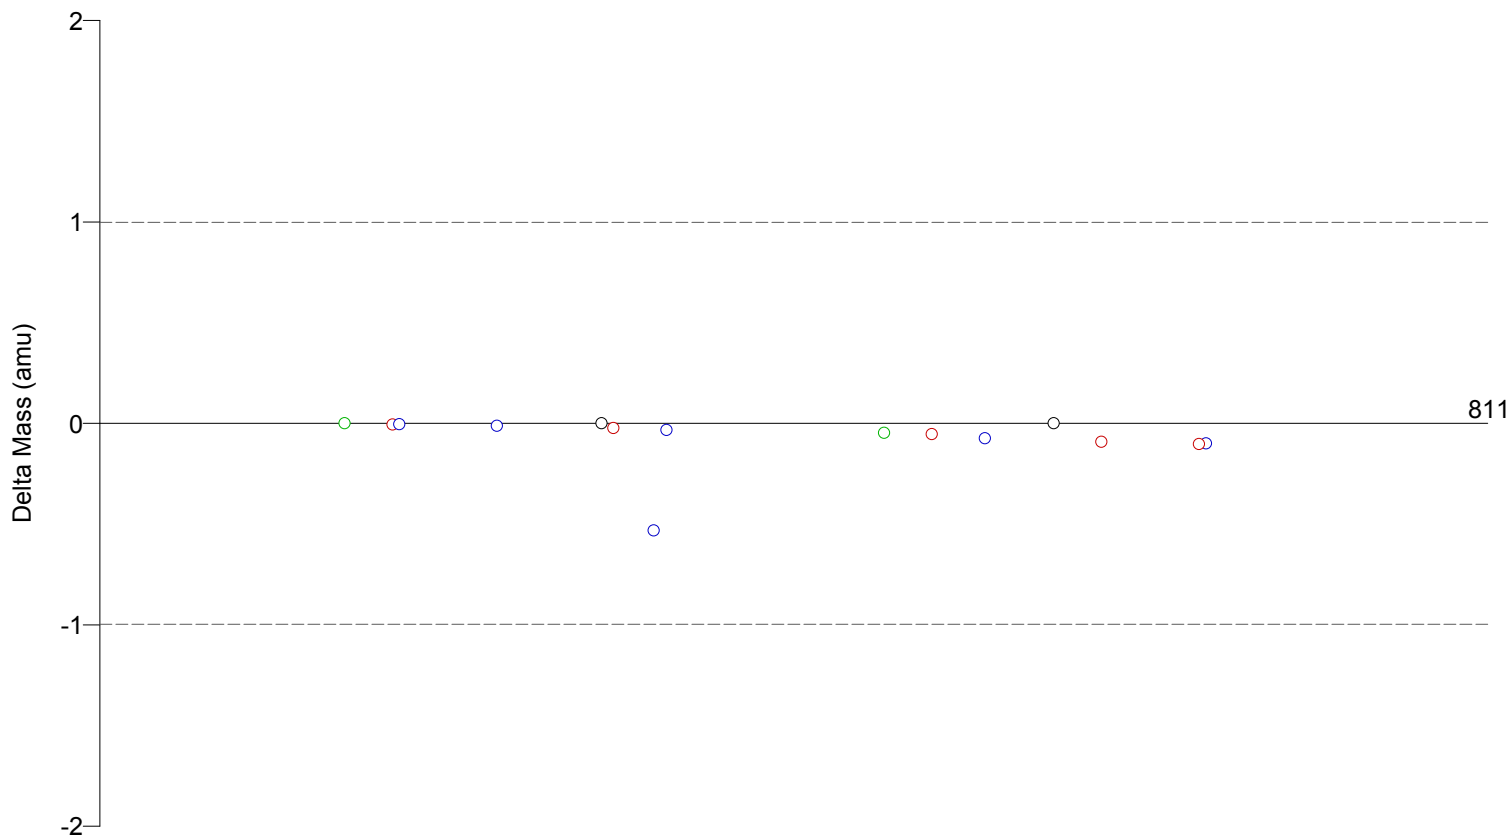

#19287468-1 NL: 1.30E5

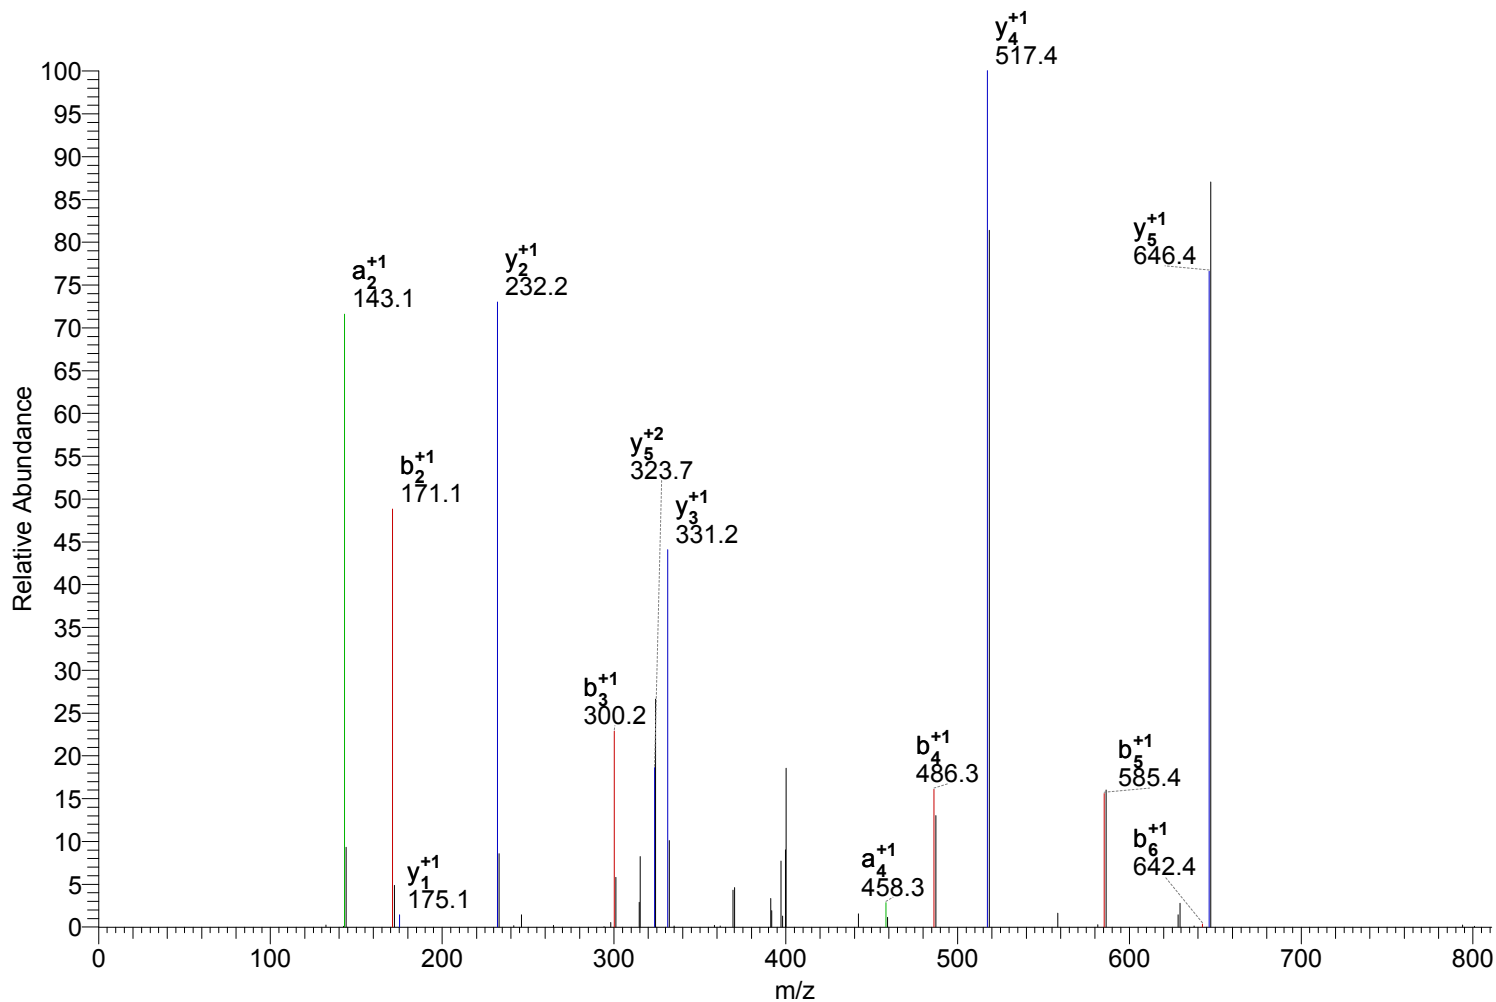

DTA for scans: 2118291816-26226248  
Precursor ion: 593.83  
Mass type: mono  
Mod's: (M\* +15.99492) C=161.01468

Ion series for charge: +1

| AA | A ions        | B ions         | B* ions | Bo ions | C ions | Y ions         | Y* ions | Yo ions | Z ions |
|----|---------------|----------------|---------|---------|--------|----------------|---------|---------|--------|
| G  | 30.03         | 58.03          |         |         |        |                |         |         |        |
| P  | 127.09        | 155.08         |         |         |        | 1129.63        |         |         |        |
| S  | 214.12        | <b>242.11</b>  |         |         |        | <b>1032.57</b> |         |         |        |
| V  | <b>313.19</b> | <b>341.18</b>  |         |         |        | <b>945.54</b>  |         |         |        |
| F  | <b>460.26</b> | <b>488.25</b>  |         |         |        | <b>846.47</b>  |         |         |        |
| P  | 557.31        | 585.30         |         |         |        | <b>699.40</b>  |         |         |        |
| L  | 670.39        | <b>698.39</b>  |         |         |        | <b>602.35</b>  |         |         |        |
| A  | 741.43        | <b>769.42</b>  |         |         |        | <b>489.27</b>  |         |         |        |
| P  | 838.48        | 866.48         |         |         |        | <b>418.23</b>  |         |         |        |
| S  | 925.51        | 953.51         |         |         |        | 321.18         |         |         |        |
| S  | 1012.55       | <b>1040.54</b> |         |         |        | 234.14         |         |         |        |
| K  |               |                |         |         |        | 147.11         |         |         |        |



#2118291816-26226248 NL: 6.95E6



---

| Reference                       |                           |         |   | P    | Score | Coverage | Accession |     |       |       |  |
|---------------------------------|---------------------------|---------|---|------|-------|----------|-----------|-----|-------|-------|--|
| Scan(s)                         | Sequence                  | MH+     | z | P    | XC    | DeltaCn  | Sp        | RSp | Ions  | Count |  |
| IPI:IPI00383732.1 TREMBL:Q9Y509 | Tax_Id=9606 Gene_Symbol=- | VH3     |   | 0.8  | 10.1  | 0.0      | 0         |     |       |       |  |
| 2118291816 -                    | K.GPSVFPLAPSSK.S          | 1186.65 | 2 | 0.02 | 2.948 | 0.348    | 465.0     | 1   | 15/33 | 14    |  |

1 of 1 peptide matches reported, 0 removed due to filtering

DTA for scans: 2118291816-26226248  
Precursor ion: 593.83  
Mass type: mono  
Mod's: (M\* +15.99492) C=161.01468

Ion series for charge: +1

| AA | A ions        | B ions         | B* ions | Bo ions | C ions | Y ions         | Y* ions | Yo ions | Z ions |
|----|---------------|----------------|---------|---------|--------|----------------|---------|---------|--------|
| G  | 30.03         | 58.03          |         |         |        |                |         |         |        |
| P  | 127.09        | 155.08         |         |         |        | 1129.63        |         |         |        |
| S  | 214.12        | <b>242.11</b>  |         |         |        | <b>1032.57</b> |         |         |        |
| V  | <b>313.19</b> | <b>341.18</b>  |         |         |        | <b>945.54</b>  |         |         |        |
| F  | <b>460.26</b> | <b>488.25</b>  |         |         |        | <b>846.47</b>  |         |         |        |
| P  | 557.31        | 585.30         |         |         |        | <b>699.40</b>  |         |         |        |
| L  | 670.39        | <b>698.39</b>  |         |         |        | <b>602.35</b>  |         |         |        |
| A  | 741.43        | <b>769.42</b>  |         |         |        | <b>489.27</b>  |         |         |        |
| P  | 838.48        | 866.48         |         |         |        | <b>418.23</b>  |         |         |        |
| S  | 925.51        | 953.51         |         |         |        | 321.18         |         |         |        |
| S  | 1012.55       | <b>1040.54</b> |         |         |        | 234.14         |         |         |        |
| K  |               |                |         |         |        | 147.11         |         |         |        |

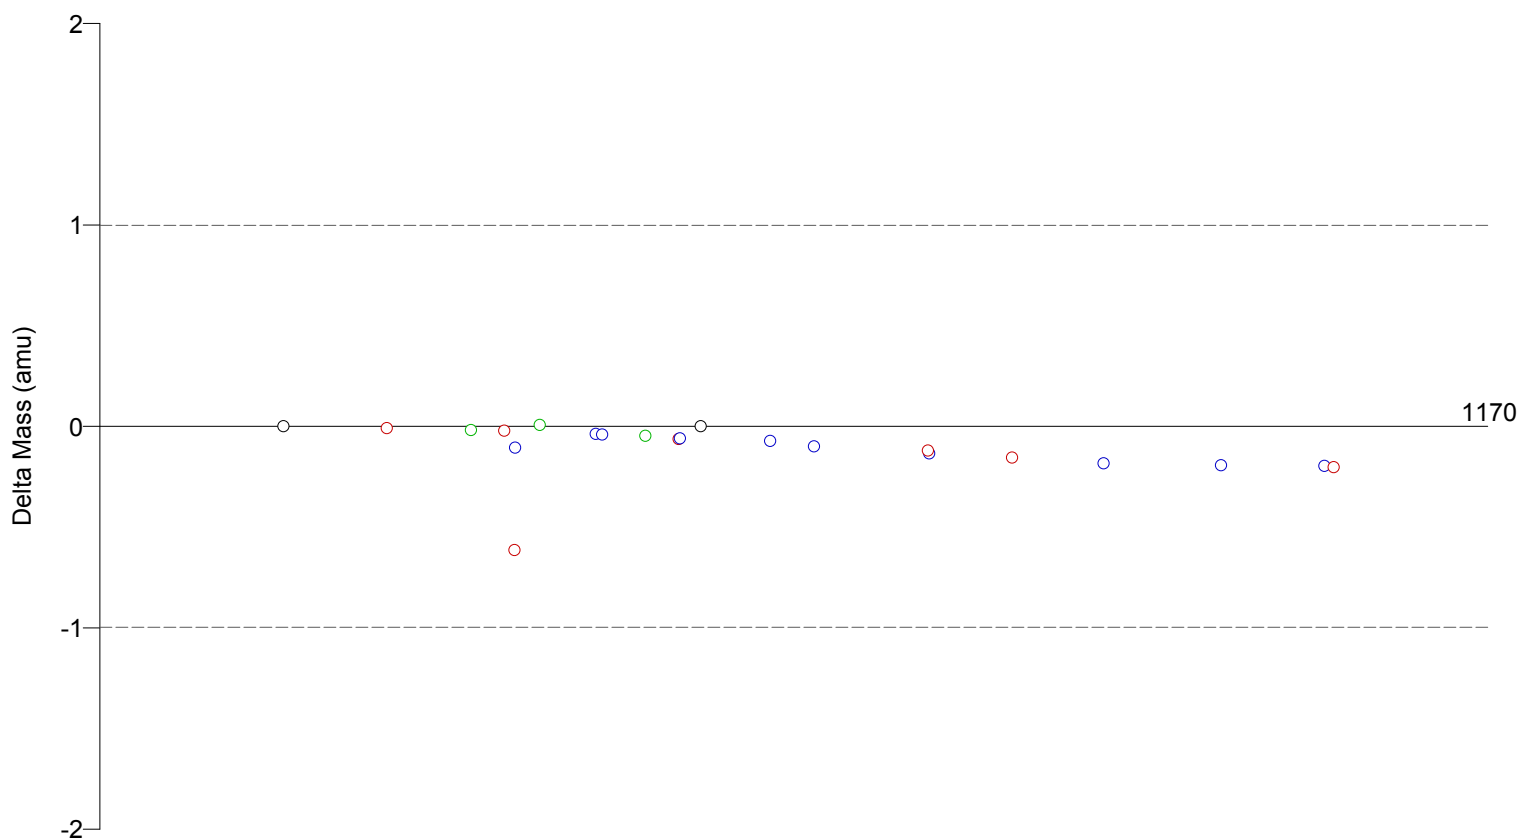

#2118291816-26226248 NL: 6.95E6





---

| Reference                          |          |         |   | P    | Score | Coverage | Accession |     |       |       |
|------------------------------------|----------|---------|---|------|-------|----------|-----------|-----|-------|-------|
| Scan(s)                            | Sequence | MH+     | z | P    | XC    | DeltaCn  | Sp        | RSp | Ions  | Count |
| IPI:IPI00384938.1 TREMBL:Q7Z351 Ta |          |         |   | 0.8  | 10.1  | 0.0      | 0         |     |       |       |
| 2118291816 - K.GPSVFPLAPSSK.S      |          | 1186.65 | 2 | 0.02 | 2.948 | 0.348    | 465.0     | 1   | 15/33 | 14    |

1 of 1 peptide matches reported, 0 removed due to filtering

DTA for scans: 2118291816-26226248  
Precursor ion: 593.83  
Mass type: mono  
Mod's: (M\* +15.99492) C=161.01468

Ion series for charge: +1

| AA | A ions        | B ions         | B* ions | Bo ions | C ions | Y ions         | Y* ions | Yo ions | Z ions |
|----|---------------|----------------|---------|---------|--------|----------------|---------|---------|--------|
| G  | 30.03         | 58.03          |         |         |        |                |         |         |        |
| P  | 127.09        | 155.08         |         |         |        | 1129.63        |         |         |        |
| S  | 214.12        | <b>242.11</b>  |         |         |        | <b>1032.57</b> |         |         |        |
| V  | <b>313.19</b> | <b>341.18</b>  |         |         |        | <b>945.54</b>  |         |         |        |
| F  | <b>460.26</b> | <b>488.25</b>  |         |         |        | <b>846.47</b>  |         |         |        |
| P  | 557.31        | 585.30         |         |         |        | <b>699.40</b>  |         |         |        |
| L  | 670.39        | <b>698.39</b>  |         |         |        | <b>602.35</b>  |         |         |        |
| A  | 741.43        | <b>769.42</b>  |         |         |        | <b>489.27</b>  |         |         |        |
| P  | 838.48        | 866.48         |         |         |        | <b>418.23</b>  |         |         |        |
| S  | 925.51        | 953.51         |         |         |        | 321.18         |         |         |        |
| S  | 1012.55       | <b>1040.54</b> |         |         |        | 234.14         |         |         |        |
| K  |               |                |         |         |        | 147.11         |         |         |        |



#2118291816-26226248 NL: 6.95E6



---

| Reference                          |          |         |   | P    | Score | Coverage | Accession |     |       |       |
|------------------------------------|----------|---------|---|------|-------|----------|-----------|-----|-------|-------|
| Scan(s)                            | Sequence | MH+     | z | P    | XC    | DeltaCn  | Sp        | RSp | Ions  | Count |
| IPI:IPI00423464.1 TREMBL:Q6N095 Ta |          |         |   | 0.8  | 10.1  | 0.0      | 0         |     |       |       |
| 2118291816 - K.GPSVFPLAPSSK.S      |          | 1186.65 | 2 | 0.02 | 2.948 | 0.348    | 465.0     | 1   | 15/33 | 14    |

1 of 1 peptide matches reported, 0 removed due to filtering

DTA for scans: 2118291816-26226248  
Precursor ion: 593.83  
Mass type: mono  
Mod's: (M\* +15.99492) C=161.01468

Ion series for charge: +1

| AA | A ions        | B ions         | B* ions | Bo ions | C ions | Y ions         | Y* ions | Yo ions | Z ions |
|----|---------------|----------------|---------|---------|--------|----------------|---------|---------|--------|
| G  | 30.03         | 58.03          |         |         |        |                |         |         |        |
| P  | 127.09        | 155.08         |         |         |        | 1129.63        |         |         |        |
| S  | 214.12        | <b>242.11</b>  |         |         |        | <b>1032.57</b> |         |         |        |
| V  | <b>313.19</b> | <b>341.18</b>  |         |         |        | <b>945.54</b>  |         |         |        |
| F  | <b>460.26</b> | <b>488.25</b>  |         |         |        | <b>846.47</b>  |         |         |        |
| P  | 557.31        | 585.30         |         |         |        | <b>699.40</b>  |         |         |        |
| L  | 670.39        | <b>698.39</b>  |         |         |        | <b>602.35</b>  |         |         |        |
| A  | 741.43        | <b>769.42</b>  |         |         |        | <b>489.27</b>  |         |         |        |
| P  | 838.48        | 866.48         |         |         |        | <b>418.23</b>  |         |         |        |
| S  | 925.51        | 953.51         |         |         |        | 321.18         |         |         |        |
| S  | 1012.55       | <b>1040.54</b> |         |         |        | 234.14         |         |         |        |
| K  |               |                |         |         |        | 147.11         |         |         |        |



#2118291816-26226248 NL: 6.95E6



---

| Reference                          |          |         |   | P    | Score | Coverage | Accession |     |       |       |
|------------------------------------|----------|---------|---|------|-------|----------|-----------|-----|-------|-------|
| Scan(s)                            | Sequence | MH+     | z | P    | XC    | DeltaCn  | Sp        | RSp | Ions  | Count |
| IPI:IPI00423466.1 TREMBL:Q6N097 Ta |          |         |   | 0.8  | 10.1  | 0.0      | 0         |     |       |       |
| 2118291816 - K.GPSVFPLAPSSK.S      |          | 1186.65 | 2 | 0.02 | 2.948 | 0.348    | 465.0     | 1   | 15/33 | 14    |

1 of 1 peptide matches reported, 0 removed due to filtering

DTA for scans: 2118291816-26226248  
Precursor ion: 593.83  
Mass type: mono  
Mod's: (M\* +15.99492) C=161.01468

Ion series for charge: +1

| AA | A ions        | B ions         | B* ions | Bo ions | C ions | Y ions         | Y* ions | Yo ions | Z ions |
|----|---------------|----------------|---------|---------|--------|----------------|---------|---------|--------|
| G  | 30.03         | 58.03          |         |         |        |                |         |         |        |
| P  | 127.09        | 155.08         |         |         |        | 1129.63        |         |         |        |
| S  | 214.12        | <b>242.11</b>  |         |         |        | <b>1032.57</b> |         |         |        |
| V  | <b>313.19</b> | <b>341.18</b>  |         |         |        | <b>945.54</b>  |         |         |        |
| F  | <b>460.26</b> | <b>488.25</b>  |         |         |        | <b>846.47</b>  |         |         |        |
| P  | 557.31        | 585.30         |         |         |        | <b>699.40</b>  |         |         |        |
| L  | 670.39        | <b>698.39</b>  |         |         |        | <b>602.35</b>  |         |         |        |
| A  | 741.43        | <b>769.42</b>  |         |         |        | <b>489.27</b>  |         |         |        |
| P  | 838.48        | 866.48         |         |         |        | <b>418.23</b>  |         |         |        |
| S  | 925.51        | 953.51         |         |         |        | 321.18         |         |         |        |
| S  | 1012.55       | <b>1040.54</b> |         |         |        | 234.14         |         |         |        |
| K  |               |                |         |         |        | 147.11         |         |         |        |





#2118291816-26226248 NL: 6.95E6



---

| Reference                          |          |         |   | P    | Score | Coverage | Accession |     |       |       |
|------------------------------------|----------|---------|---|------|-------|----------|-----------|-----|-------|-------|
| Scan(s)                            | Sequence | MH+     | z | P    | XC    | DeltaCn  | Sp        | RSp | Ions  | Count |
| IPI:IPI00442911.1 TREMBL:Q6ZP87 Ta |          |         |   | 0.8  | 10.1  | 0.0      | 0         |     |       |       |
| 2118291816 - K.GPSVFPLAPSSK.S      |          | 1186.65 | 2 | 0.02 | 2.948 | 0.348    | 465.0     | 1   | 15/33 | 14    |

1 of 1 peptide matches reported, 0 removed due to filtering

DTA for scans: 2118291816-26226248  
Precursor ion: 593.83  
Mass type: mono  
Mod's: (M\* +15.99492) C=161.01468

Ion series for charge: +1

| AA | A ions        | B ions         | B* ions | Bo ions | C ions | Y ions         | Y* ions | Yo ions | Z ions |
|----|---------------|----------------|---------|---------|--------|----------------|---------|---------|--------|
| G  | 30.03         | 58.03          |         |         |        |                |         |         |        |
| P  | 127.09        | 155.08         |         |         |        | 1129.63        |         |         |        |
| S  | 214.12        | <b>242.11</b>  |         |         |        | <b>1032.57</b> |         |         |        |
| V  | <b>313.19</b> | <b>341.18</b>  |         |         |        | <b>945.54</b>  |         |         |        |
| F  | <b>460.26</b> | <b>488.25</b>  |         |         |        | <b>846.47</b>  |         |         |        |
| P  | 557.31        | 585.30         |         |         |        | <b>699.40</b>  |         |         |        |
| L  | 670.39        | <b>698.39</b>  |         |         |        | <b>602.35</b>  |         |         |        |
| A  | 741.43        | <b>769.42</b>  |         |         |        | <b>489.27</b>  |         |         |        |
| P  | 838.48        | 866.48         |         |         |        | <b>418.23</b>  |         |         |        |
| S  | 925.51        | 953.51         |         |         |        | 321.18         |         |         |        |
| S  | 1012.55       | <b>1040.54</b> |         |         |        | 234.14         |         |         |        |
| K  |               |                |         |         |        | 147.11         |         |         |        |



#2118291816-26226248 NL: 6.95E6



---

| Reference                          |          |         |   | P    | Score | Coverage | Accession |     |       |       |
|------------------------------------|----------|---------|---|------|-------|----------|-----------|-----|-------|-------|
| Scan(s)                            | Sequence | MH+     | z | P    | XC    | DeltaCn  | Sp        | RSp | Ions  | Count |
| IPI:IPI00784817.1 TREMBL:Q5EFE5 Ta |          |         |   | 0.8  | 10.1  | 0.0      | 0         |     |       |       |
| 2118291816 - K.GPSVFPLAPSSK.S      |          | 1186.65 | 2 | 0.02 | 2.948 | 0.348    | 465.0     | 1   | 15/33 | 14    |

1 of 1 peptide matches reported, 0 removed due to filtering

DTA for scans: 2118291816-26226248  
Precursor ion: 593.83  
Mass type: mono  
Mod's: (M\* +15.99492) C=161.01468

Ion series for charge: +1

| AA | A ions        | B ions         | B* ions | Bo ions | C ions | Y ions         | Y* ions | Yo ions | Z ions |
|----|---------------|----------------|---------|---------|--------|----------------|---------|---------|--------|
| G  | 30.03         | 58.03          |         |         |        |                |         |         |        |
| P  | 127.09        | 155.08         |         |         |        | 1129.63        |         |         |        |
| S  | 214.12        | <b>242.11</b>  |         |         |        | <b>1032.57</b> |         |         |        |
| V  | <b>313.19</b> | <b>341.18</b>  |         |         |        | <b>945.54</b>  |         |         |        |
| F  | <b>460.26</b> | <b>488.25</b>  |         |         |        | <b>846.47</b>  |         |         |        |
| P  | 557.31        | 585.30         |         |         |        | <b>699.40</b>  |         |         |        |
| L  | 670.39        | <b>698.39</b>  |         |         |        | <b>602.35</b>  |         |         |        |
| A  | 741.43        | <b>769.42</b>  |         |         |        | <b>489.27</b>  |         |         |        |
| P  | 838.48        | 866.48         |         |         |        | <b>418.23</b>  |         |         |        |
| S  | 925.51        | 953.51         |         |         |        | 321.18         |         |         |        |
| S  | 1012.55       | <b>1040.54</b> |         |         |        | 234.14         |         |         |        |
| K  |               |                |         |         |        | 147.11         |         |         |        |



#2118291816-26226248 NL: 6.95E6



---

| Reference                          |                  |         |   | P    | Score | Coverage | Accession |     |       |       |
|------------------------------------|------------------|---------|---|------|-------|----------|-----------|-----|-------|-------|
| Scan(s)                            | Sequence         | MH+     | z | P    | XC    | DeltaCn  | Sp        | RSp | Ions  | Count |
| IPI:IPI00785084.2 SWISS-PROT:P0185 |                  |         |   | 0.8  | 10.1  | 0.0      | 0         |     |       |       |
| 2118291816 -                       | K.GPSVFPLAPSSK.S | 1186.65 | 2 | 0.02 | 2.948 | 0.348    | 465.0     | 1   | 15/33 | 14    |

1 of 1 peptide matches reported, 0 removed due to filtering



DTA for scans: 2118291816-26226248  
Precursor ion: 593.83  
Mass type: mono  
Mod's: (M\* +15.99492) C=161.01468

Ion series for charge: +1

| AA | A ions        | B ions         | B* ions | Bo ions | C ions | Y ions         | Y* ions | Yo ions | Z ions |
|----|---------------|----------------|---------|---------|--------|----------------|---------|---------|--------|
| G  | 30.03         | 58.03          |         |         |        |                |         |         |        |
| P  | 127.09        | 155.08         |         |         |        | 1129.63        |         |         |        |
| S  | 214.12        | <b>242.11</b>  |         |         |        | <b>1032.57</b> |         |         |        |
| V  | <b>313.19</b> | <b>341.18</b>  |         |         |        | <b>945.54</b>  |         |         |        |
| F  | <b>460.26</b> | <b>488.25</b>  |         |         |        | <b>846.47</b>  |         |         |        |
| P  | 557.31        | 585.30         |         |         |        | <b>699.40</b>  |         |         |        |
| L  | 670.39        | <b>698.39</b>  |         |         |        | <b>602.35</b>  |         |         |        |
| A  | 741.43        | <b>769.42</b>  |         |         |        | <b>489.27</b>  |         |         |        |
| P  | 838.48        | 866.48         |         |         |        | <b>418.23</b>  |         |         |        |
| S  | 925.51        | 953.51         |         |         |        | 321.18         |         |         |        |
| S  | 1012.55       | <b>1040.54</b> |         |         |        | 234.14         |         |         |        |
| K  |               |                |         |         |        | 147.11         |         |         |        |



#2118291816-26226248 NL: 6.95E6



---

| Reference                          |          |         |   | P    | Score | Coverage | Accession |     |       |       |
|------------------------------------|----------|---------|---|------|-------|----------|-----------|-----|-------|-------|
| Scan(s)                            | Sequence | MH+     | z | P    | XC    | DeltaCn  | Sp        | RSp | Ions  | Count |
| IPI:IPI00816314.1 TREMBL:Q6N096 Ta |          |         |   | 0.8  | 10.1  | 0.0      | 0         |     |       |       |
| 2118291816 - K.GPSVFPLAPSSK.S      |          | 1186.65 | 2 | 0.02 | 2.948 | 0.348    | 465.0     | 1   | 15/33 | 14    |

1 of 1 peptide matches reported, 0 removed due to filtering

DTA for scans: 2118291816-26226248  
Precursor ion: 593.83  
Mass type: mono  
Mod's: (M\* +15.99492) C=161.01468

Ion series for charge: +1

| AA | A ions        | B ions         | B* ions | Bo ions | C ions | Y ions         | Y* ions | Yo ions | Z ions |
|----|---------------|----------------|---------|---------|--------|----------------|---------|---------|--------|
| G  | 30.03         | 58.03          |         |         |        |                |         |         |        |
| P  | 127.09        | 155.08         |         |         |        | 1129.63        |         |         |        |
| S  | 214.12        | <b>242.11</b>  |         |         |        | <b>1032.57</b> |         |         |        |
| V  | <b>313.19</b> | <b>341.18</b>  |         |         |        | <b>945.54</b>  |         |         |        |
| F  | <b>460.26</b> | <b>488.25</b>  |         |         |        | <b>846.47</b>  |         |         |        |
| P  | 557.31        | 585.30         |         |         |        | <b>699.40</b>  |         |         |        |
| L  | 670.39        | <b>698.39</b>  |         |         |        | <b>602.35</b>  |         |         |        |
| A  | 741.43        | <b>769.42</b>  |         |         |        | <b>489.27</b>  |         |         |        |
| P  | 838.48        | 866.48         |         |         |        | <b>418.23</b>  |         |         |        |
| S  | 925.51        | 953.51         |         |         |        | 321.18         |         |         |        |
| S  | 1012.55       | <b>1040.54</b> |         |         |        | 234.14         |         |         |        |
| K  |               |                |         |         |        | 147.11         |         |         |        |



#2118291816-26226248 NL: 6.95E6



---

| Reference                          |          |         |   | P    | Score | Coverage | Accession |     |       |       |
|------------------------------------|----------|---------|---|------|-------|----------|-----------|-----|-------|-------|
| Scan(s)                            | Sequence | MH+     | z | P    | XC    | DeltaCn  | Sp        | RSp | Ions  | Count |
| IPI:IPI00844239.1 TREMBL:A4F255 Ta |          |         |   | 0.8  | 10.1  | 0.0      | 0         |     |       |       |
| 2118291816 - K.GPSVFPLAPSSK.S      |          | 1186.65 | 2 | 0.02 | 2.948 | 0.348    | 465.0     | 1   | 15/33 | 14    |

1 of 1 peptide matches reported, 0 removed due to filtering

DTA for scans: 2118291816-26226248  
Precursor ion: 593.83  
Mass type: mono  
Mod's: (M\* +15.99492) C=161.01468

Ion series for charge: +1

| AA | A ions        | B ions         | B* ions | Bo ions | C ions | Y ions         | Y* ions | Yo ions | Z ions |
|----|---------------|----------------|---------|---------|--------|----------------|---------|---------|--------|
| G  | 30.03         | 58.03          |         |         |        |                |         |         |        |
| P  | 127.09        | 155.08         |         |         |        | 1129.63        |         |         |        |
| S  | 214.12        | <b>242.11</b>  |         |         |        | <b>1032.57</b> |         |         |        |
| V  | <b>313.19</b> | <b>341.18</b>  |         |         |        | <b>945.54</b>  |         |         |        |
| F  | <b>460.26</b> | <b>488.25</b>  |         |         |        | <b>846.47</b>  |         |         |        |
| P  | 557.31        | 585.30         |         |         |        | <b>699.40</b>  |         |         |        |
| L  | 670.39        | <b>698.39</b>  |         |         |        | <b>602.35</b>  |         |         |        |
| A  | 741.43        | <b>769.42</b>  |         |         |        | <b>489.27</b>  |         |         |        |
| P  | 838.48        | 866.48         |         |         |        | <b>418.23</b>  |         |         |        |
| S  | 925.51        | 953.51         |         |         |        | 321.18         |         |         |        |
| S  | 1012.55       | <b>1040.54</b> |         |         |        | 234.14         |         |         |        |
| K  |               |                |         |         |        | 147.11         |         |         |        |



#2118291816-26226248 NL: 6.95E6





---

| Reference                          |                  |         |   | P    | Score | Coverage | Accession |     |       |       |
|------------------------------------|------------------|---------|---|------|-------|----------|-----------|-----|-------|-------|
| Scan(s)                            | Sequence         | MH+     | z | P    | XC    | DeltaCn  | Sp        | RSp | Ions  | Count |
| IPI:IPI00892671.1 VEGA:OTTHUMP0000 |                  |         |   | 0.8  | 10.1  | 0.0      | 0         |     |       |       |
| 2118291816 -                       | K.GPSVFPLAPSSK.S | 1186.65 | 2 | 0.02 | 2.948 | 0.348    | 465.0     | 1   | 15/33 | 14    |

1 of 1 peptide matches reported, 0 removed due to filtering

DTA for scans: 2118291816-26226248  
Precursor ion: 593.83  
Mass type: mono  
Mod's: (M\* +15.99492) C=161.01468

Ion series for charge: +1

| AA | A ions        | B ions         | B* ions | Bo ions | C ions | Y ions         | Y* ions | Yo ions | Z ions |
|----|---------------|----------------|---------|---------|--------|----------------|---------|---------|--------|
| G  | 30.03         | 58.03          |         |         |        |                |         |         |        |
| P  | 127.09        | 155.08         |         |         |        | 1129.63        |         |         |        |
| S  | 214.12        | <b>242.11</b>  |         |         |        | <b>1032.57</b> |         |         |        |
| V  | <b>313.19</b> | <b>341.18</b>  |         |         |        | <b>945.54</b>  |         |         |        |
| F  | <b>460.26</b> | <b>488.25</b>  |         |         |        | <b>846.47</b>  |         |         |        |
| P  | 557.31        | 585.30         |         |         |        | <b>699.40</b>  |         |         |        |
| L  | 670.39        | <b>698.39</b>  |         |         |        | <b>602.35</b>  |         |         |        |
| A  | 741.43        | <b>769.42</b>  |         |         |        | <b>489.27</b>  |         |         |        |
| P  | 838.48        | 866.48         |         |         |        | <b>418.23</b>  |         |         |        |
| S  | 925.51        | 953.51         |         |         |        | 321.18         |         |         |        |
| S  | 1012.55       | <b>1040.54</b> |         |         |        | 234.14         |         |         |        |
| K  |               |                |         |         |        | 147.11         |         |         |        |



#2118291816-26226248 NL: 6.95E6



---

| Reference                                                      |              |        |   | P    | Score | Coverage | Accession |     |       |       |
|----------------------------------------------------------------|--------------|--------|---|------|-------|----------|-----------|-----|-------|-------|
| Scan(s)                                                        | Sequence     | MH+    | z | P    | XC    | DeltaCn  | Sp        | RSp | Ions  | Count |
| IPI:IPI00030229.4 TREMBL:Q5QPP4 ENSEMBL:ENSP00000363622 VEGA:O |              |        |   | 0.9  | 10.1  | 0.0      | 0         |     |       |       |
| 19287468 - 1                                                   | K.TWNAVLLR.Y | 972.56 | 2 | 0.03 | 2.663 | 0.089    | 1273.6    | 1   | 15/21 | 4     |

1 of 1 peptide matches reported, 0 removed due to filtering

DTA for scans: 19287468-1  
Precursor ion: 486.79  
Mass type: mono  
Mod's: (M\* +15.99492) C=161.01468

Ion series for charge: +1

| AA | A ions        | B ions        | B* ions | Bo ions | C ions | Y ions        | Y* ions | Yo ions | Z ions |
|----|---------------|---------------|---------|---------|--------|---------------|---------|---------|--------|
| T  | 74.06         | 102.05        |         |         |        |               |         |         |        |
| W  | <b>260.14</b> | <b>288.13</b> |         |         |        | 871.51        |         |         |        |
| N  | <b>374.18</b> | <b>402.18</b> |         |         |        | <b>685.44</b> |         |         |        |
| A  | 445.22        | <b>473.21</b> |         |         |        | <b>571.39</b> |         |         |        |
| V  | 544.29        | <b>572.28</b> |         |         |        | <b>500.36</b> |         |         |        |
| L  | 657.37        | <b>685.37</b> |         |         |        | 401.29        |         |         |        |
| L  | 770.46        | <b>798.45</b> |         |         |        | <b>288.20</b> |         |         |        |
| R  |               |               |         |         |        | <b>175.12</b> |         |         |        |

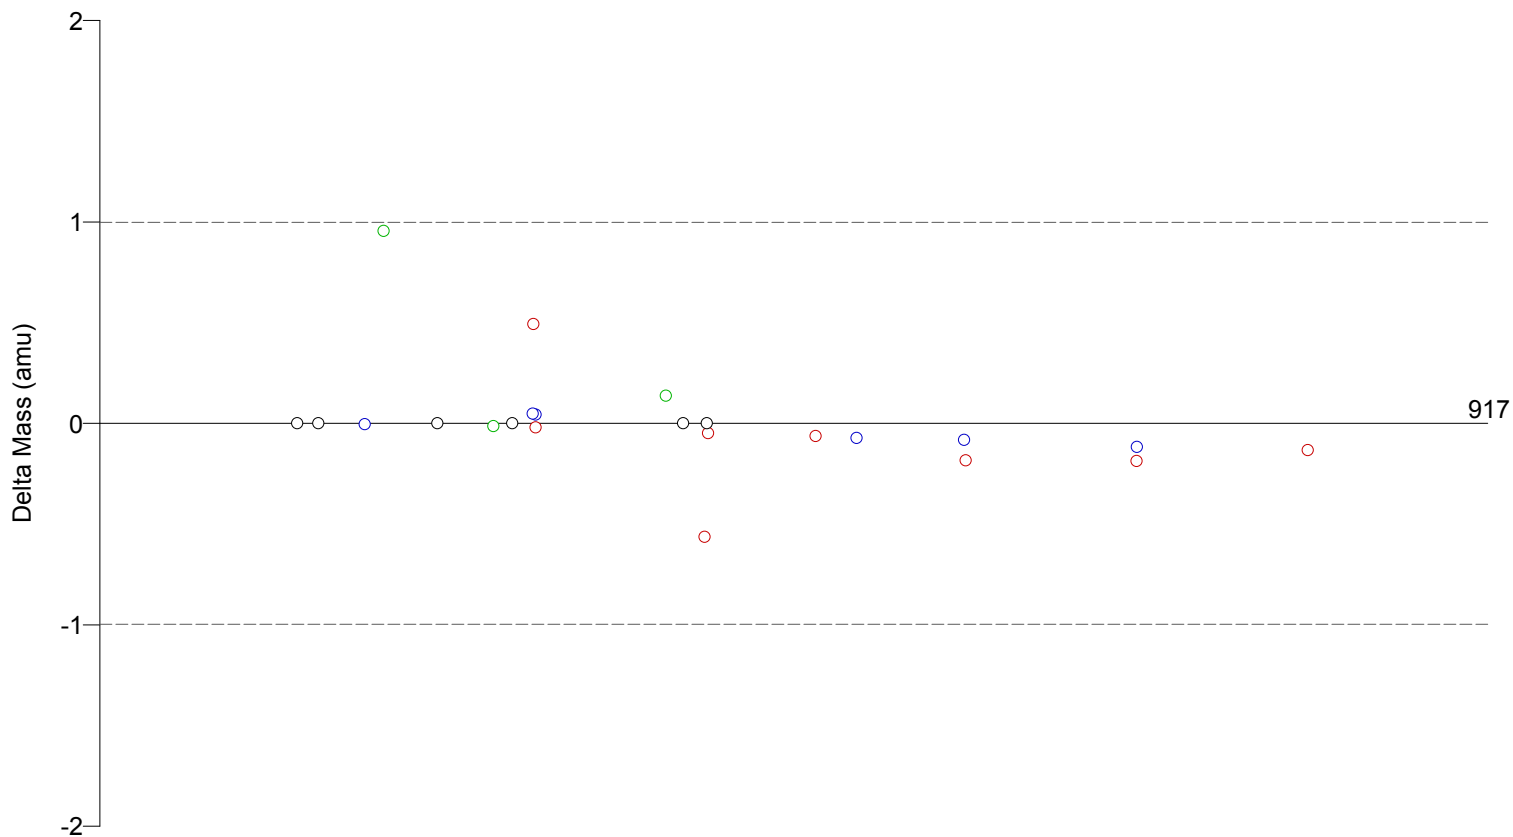

#19287468-1 NL: 1.90E5

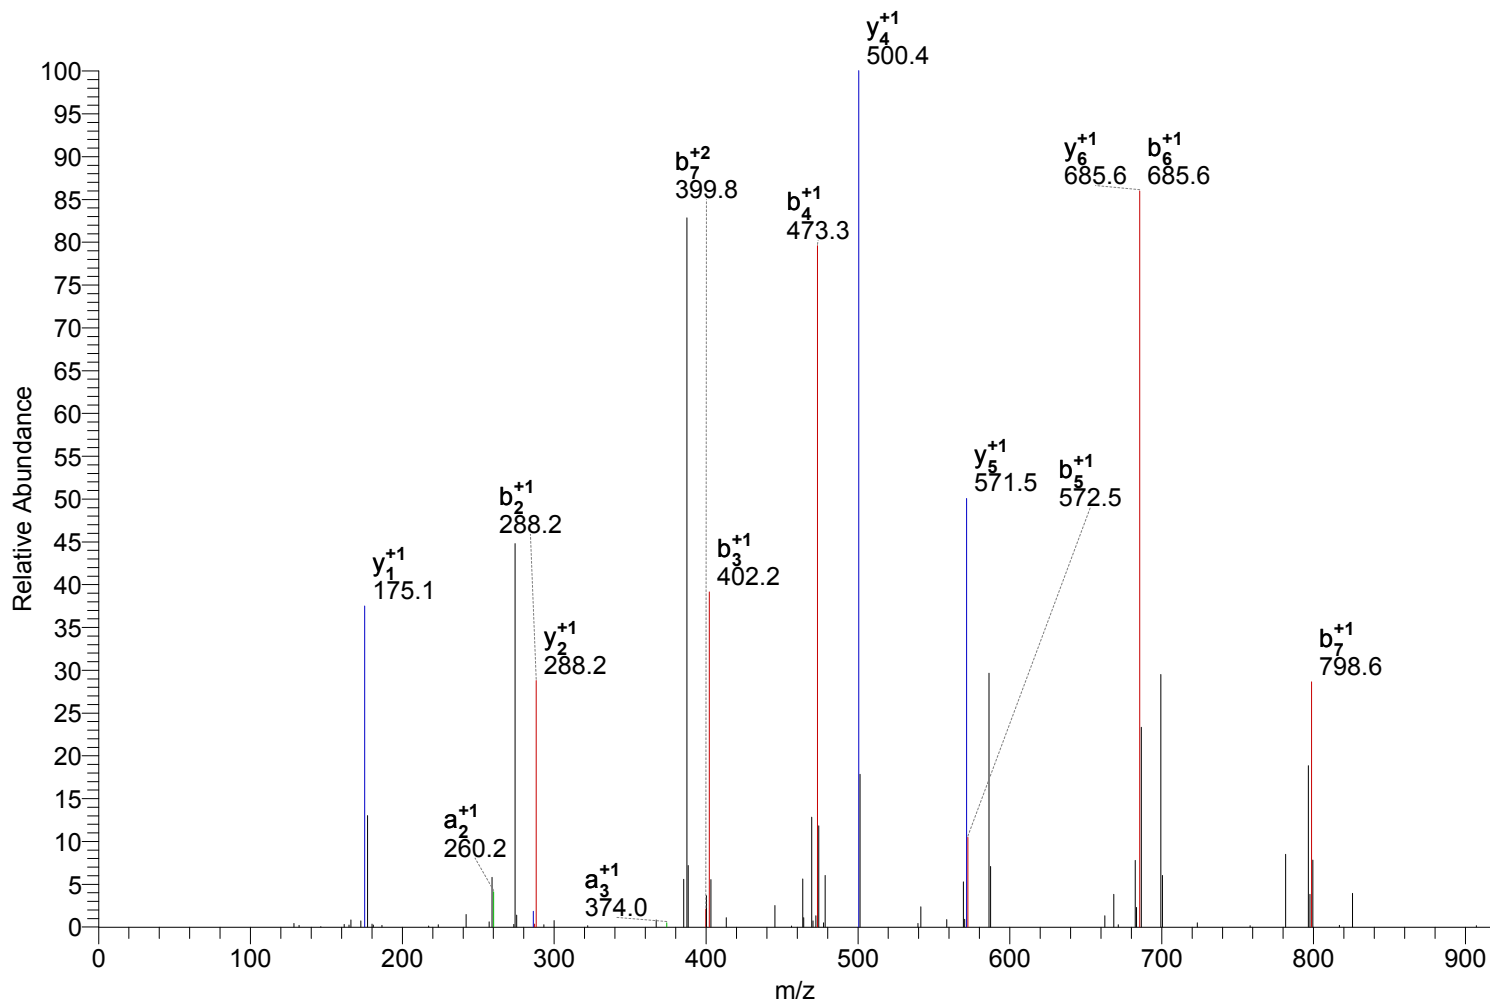

---

| Reference                          |              |        |   | P    | Score | Coverage | Accession |     |       |       |
|------------------------------------|--------------|--------|---|------|-------|----------|-----------|-----|-------|-------|
| Scan(s)                            | Sequence     | MH+    | z | P    | XC    | DeltaCn  | Sp        | RSp | Ions  | Count |
| IPI:IPI00553131.2 SWISS-PROT:Q1437 |              |        |   | 0.9  | 10.1  | 0.0      |           | 0   |       |       |
| 19287468 - 1                       | K.TWNAVLLR.Y | 972.56 | 2 | 0.03 | 2.663 | 0.089    | 1273.6    | 1   | 15/21 | 4     |

1 of 1 peptide matches reported, 0 removed due to filtering

DTA for scans: 19287468-1  
Precursor ion: 486.79  
Mass type: mono  
Mod's: (M\* +15.99492) C=161.01468

Ion series for charge: +1

| AA | A ions        | B ions        | B* ions | Bo ions | C ions | Y ions        | Y* ions | Yo ions | Z ions |
|----|---------------|---------------|---------|---------|--------|---------------|---------|---------|--------|
| T  | 74.06         | 102.05        |         |         |        |               |         |         |        |
| W  | <b>260.14</b> | <b>288.13</b> |         |         |        | 871.51        |         |         |        |
| N  | <b>374.18</b> | <b>402.18</b> |         |         |        | <b>685.44</b> |         |         |        |
| A  | 445.22        | <b>473.21</b> |         |         |        | <b>571.39</b> |         |         |        |
| V  | 544.29        | <b>572.28</b> |         |         |        | <b>500.36</b> |         |         |        |
| L  | 657.37        | <b>685.37</b> |         |         |        | 401.29        |         |         |        |
| L  | 770.46        | <b>798.45</b> |         |         |        | <b>288.20</b> |         |         |        |
| R  |               |               |         |         |        | <b>175.12</b> |         |         |        |



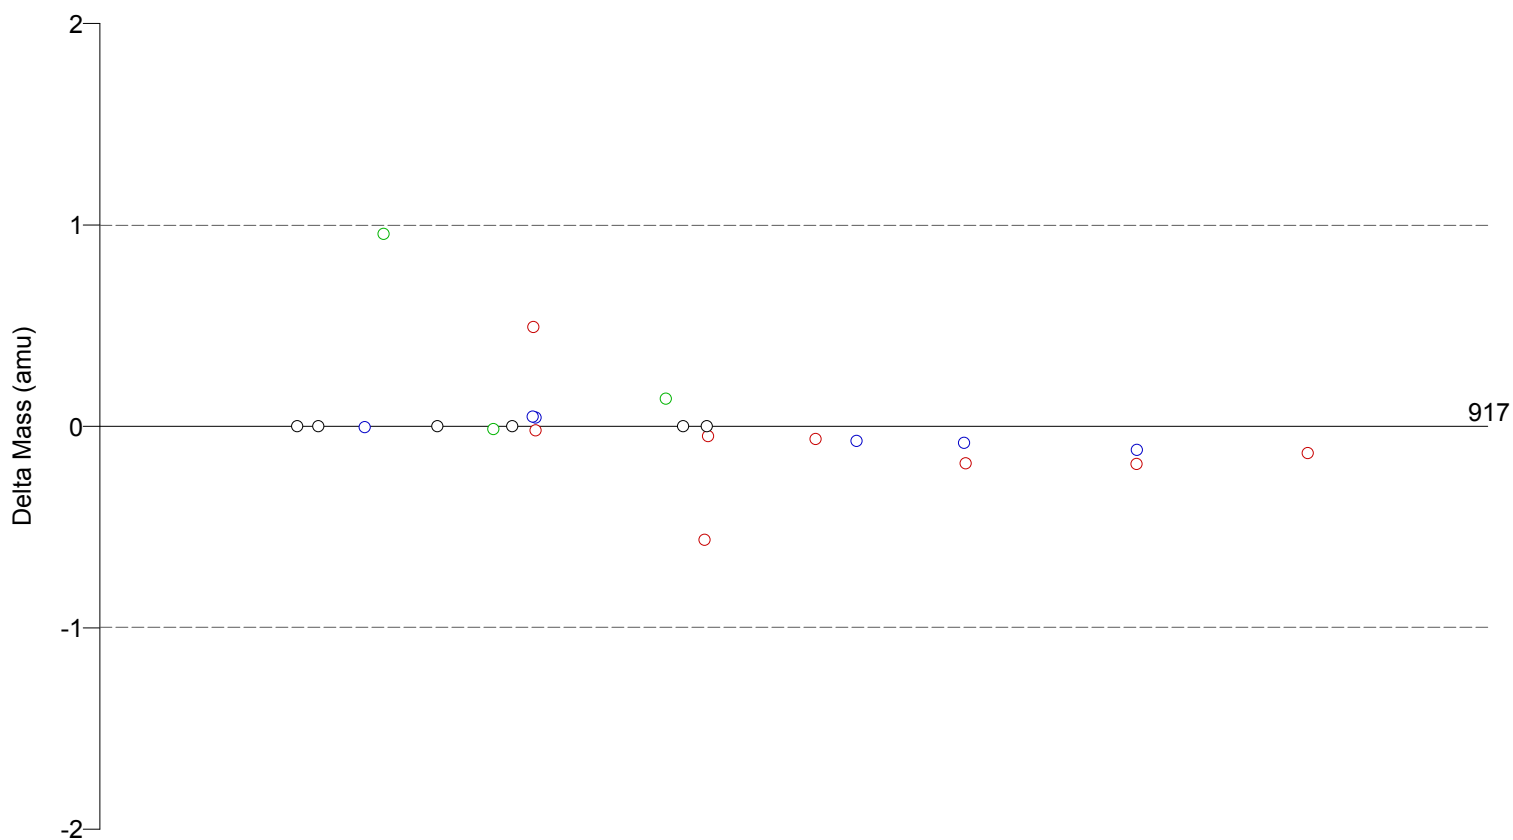

#19287468-1 NL: 1.90E5



---

| Reference                          |              |        |   | P    | Score | Coverage | Accession |     |       |       |
|------------------------------------|--------------|--------|---|------|-------|----------|-----------|-----|-------|-------|
| Scan(s)                            | Sequence     | MH+    | z | P    | XC    | DeltaCn  | Sp        | RSp | Ions  | Count |
| IPI:IPI00641123.1 TREMBL:Q5QPP1 VE |              |        |   | 0.9  | 10.1  | 0.0      |           | 0   |       |       |
| 19287468 - 1                       | K.TWNAVLLR.Y | 972.56 | 2 | 0.03 | 2.663 | 0.089    | 1273.6    | 1   | 15/21 | 4     |

1 of 1 peptide matches reported, 0 removed due to filtering

DTA for scans: 19287468-1  
Precursor ion: 486.79  
Mass type: mono  
Mod's: (M\* +15.99492) C=161.01468

Ion series for charge: +1

| AA | A ions        | B ions        | B* ions | Bo ions | C ions | Y ions        | Y* ions | Yo ions | Z ions |
|----|---------------|---------------|---------|---------|--------|---------------|---------|---------|--------|
| T  | 74.06         | 102.05        |         |         |        |               |         |         |        |
| W  | <b>260.14</b> | <b>288.13</b> |         |         |        | 871.51        |         |         |        |
| N  | <b>374.18</b> | <b>402.18</b> |         |         |        | <b>685.44</b> |         |         |        |
| A  | 445.22        | <b>473.21</b> |         |         |        | <b>571.39</b> |         |         |        |
| V  | 544.29        | <b>572.28</b> |         |         |        | <b>500.36</b> |         |         |        |
| L  | 657.37        | <b>685.37</b> |         |         |        | 401.29        |         |         |        |
| L  | 770.46        | <b>798.45</b> |         |         |        | <b>288.20</b> |         |         |        |
| R  |               |               |         |         |        | <b>175.12</b> |         |         |        |



#19287468-1 NL: 1.90E5



---

| Reference                          |              |        | P | Score | Coverage | Accession |        |     |       |       |
|------------------------------------|--------------|--------|---|-------|----------|-----------|--------|-----|-------|-------|
| Scan(s)                            | Sequence     | MH+    | z | P     | XC       | DeltaCn   | Sp     | RSp | Ions  | Count |
| IPI:IPI00644339.1 TREMBL:Q5QPP3 VE |              |        |   | 0.9   | 10.1     | 0.0       |        | 0   |       |       |
| 19287468 - 1                       | K.TWNAVLLR.Y | 972.56 | 2 | 0.03  | 2.663    | 0.089     | 1273.6 | 1   | 15/21 | 4     |

1 of 1 peptide matches reported, 0 removed due to filtering

DTA for scans: 19287468-1  
Precursor ion: 486.79  
Mass type: mono  
Mod's: (M\* +15.99492) C=161.01468

Ion series for charge: +1

| AA | A ions        | B ions        | B* ions | Bo ions | C ions | Y ions        | Y* ions | Yo ions | Z ions |
|----|---------------|---------------|---------|---------|--------|---------------|---------|---------|--------|
| T  | 74.06         | 102.05        |         |         |        |               |         |         |        |
| W  | <b>260.14</b> | <b>288.13</b> |         |         |        | 871.51        |         |         |        |
| N  | <b>374.18</b> | <b>402.18</b> |         |         |        | <b>685.44</b> |         |         |        |
| A  | 445.22        | <b>473.21</b> |         |         |        | <b>571.39</b> |         |         |        |
| V  | 544.29        | <b>572.28</b> |         |         |        | <b>500.36</b> |         |         |        |
| L  | 657.37        | <b>685.37</b> |         |         |        | 401.29        |         |         |        |
| L  | 770.46        | <b>798.45</b> |         |         |        | <b>288.20</b> |         |         |        |
| R  |               |               |         |         |        | <b>175.12</b> |         |         |        |



#19287468-1 NL: 1.90E5



---

| Reference                          |              |        |   | P    | Score | Coverage | Accession |     |       |       |
|------------------------------------|--------------|--------|---|------|-------|----------|-----------|-----|-------|-------|
| Scan(s)                            | Sequence     | MH+    | z | P    | XC    | DeltaCn  | Sp        | RSp | Ions  | Count |
| IPI:IPI00644364.1 TREMBL:Q5QPP2 VE |              |        |   | 0.9  | 10.1  | 0.0      |           | 0   |       |       |
| 19287468 - 1                       | K.TWNAVLLR.Y | 972.56 | 2 | 0.03 | 2.663 | 0.089    | 1273.6    | 1   | 15/21 | 4     |

1 of 1 peptide matches reported, 0 removed due to filtering



DTA for scans: 19287468-1  
Precursor ion: 486.79  
Mass type: mono  
Mod's: (M\* +15.99492) C=161.01468

Ion series for charge: +1

| AA | A ions        | B ions        | B* ions | Bo ions | C ions | Y ions        | Y* ions | Yo ions | Z ions |
|----|---------------|---------------|---------|---------|--------|---------------|---------|---------|--------|
| T  | 74.06         | 102.05        |         |         |        |               |         |         |        |
| W  | <b>260.14</b> | <b>288.13</b> |         |         |        | 871.51        |         |         |        |
| N  | <b>374.18</b> | <b>402.18</b> |         |         |        | <b>685.44</b> |         |         |        |
| A  | 445.22        | <b>473.21</b> |         |         |        | <b>571.39</b> |         |         |        |
| V  | 544.29        | <b>572.28</b> |         |         |        | <b>500.36</b> |         |         |        |
| L  | 657.37        | <b>685.37</b> |         |         |        | 401.29        |         |         |        |
| L  | 770.46        | <b>798.45</b> |         |         |        | <b>288.20</b> |         |         |        |
| R  |               |               |         |         |        | <b>175.12</b> |         |         |        |



#19287468-1 NL: 1.90E5



---

| Reference                                                     |          |         |   | P    | Score | Coverage | Accession |     |       |       |
|---------------------------------------------------------------|----------|---------|---|------|-------|----------|-----------|-----|-------|-------|
| Scan(s)                                                       | Sequence | MH+     | z | P    | XC    | DeltaCn  | Sp        | RSp | Ions  | Count |
| IPI:IPI00414914.3 SWISS-PROT:P61580 Tax_Id=9606 Gene_Symbol=- |          |         |   | 0.9  | 8.1   | 0.0      | 0         |     |       |       |
| 19287468 - 1 R.WCLQVYPTAPKR.Q                                 |          | 1519.77 | 2 | 0.04 | 2.492 | 0.609    | 380.1     | 2   | 13/33 | 3     |

1 of 1 peptide matches reported, 0 removed due to filtering

DTA for scans: 19287468-1  
Precursor ion: 760.38  
Mass type: mono  
Mod's: (M\* +15.99492) C=161.01468

Ion series for charge: +1

| AA | A ions        | B ions         | B* ions | Bo ions | C ions | Y ions         | Y* ions | Yo ions | Z ions |
|----|---------------|----------------|---------|---------|--------|----------------|---------|---------|--------|
| W  | 159.09        | 187.09         |         |         |        |                |         |         |        |
| C  | 320.11        | <b>348.10</b>  |         |         |        | 1333.69        |         |         |        |
| L  | <b>433.19</b> | <b>461.19</b>  |         |         |        | <b>1172.68</b> |         |         |        |
| Q  | <b>561.25</b> | <b>589.24</b>  |         |         |        | <b>1059.59</b> |         |         |        |
| V  | <b>660.32</b> | 688.31         |         |         |        | <b>931.54</b>  |         |         |        |
| Y  | 823.38        | 851.38         |         |         |        | 832.47         |         |         |        |
| P  | 920.43        | 948.43         |         |         |        | <b>669.40</b>  |         |         |        |
| T  | 1021.48       | 1049.48        |         |         |        | <b>572.35</b>  |         |         |        |
| A  | 1092.52       | 1120.51        |         |         |        | 471.30         |         |         |        |
| P  | 1189.57       | 1217.57        |         |         |        | 400.27         |         |         |        |
| K  | 1317.67       | <b>1345.66</b> |         |         |        | <b>303.21</b>  |         |         |        |
| R  |               |                |         |         |        | 175.12         |         |         |        |

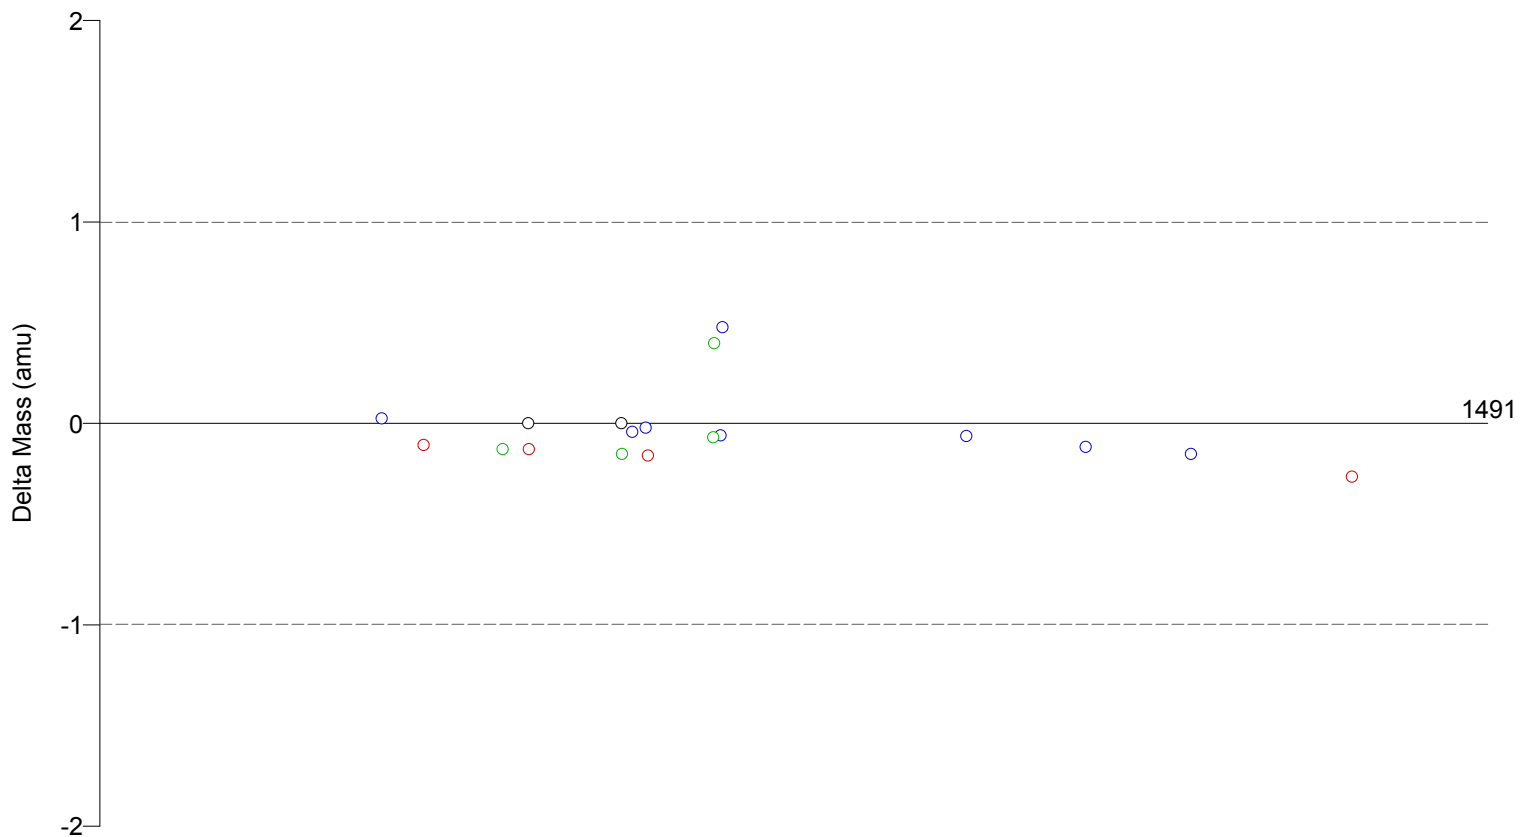

#19287468-1 NL: 6.47E4

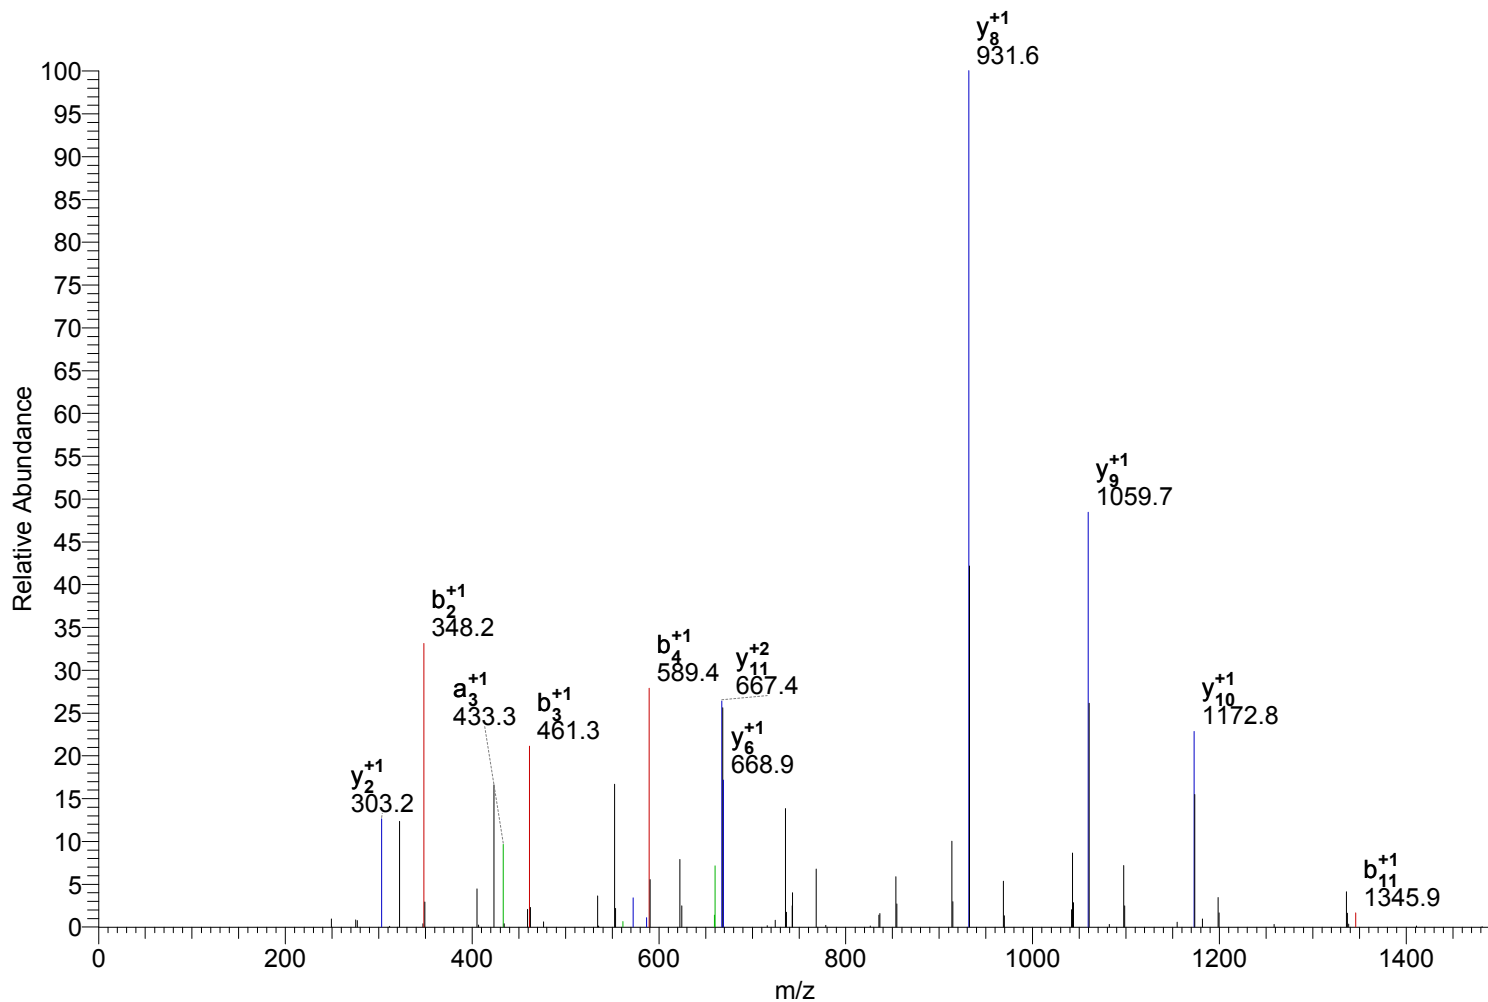

---

| Reference                          |                  |         |   | P    | Score | Coverage | Accession |     |       |       |
|------------------------------------|------------------|---------|---|------|-------|----------|-----------|-----|-------|-------|
| Scan(s)                            | Sequence         | MH+     | z | P    | XC    | DeltaCn  | Sp        | RSp | Ions  | Count |
| IPI:IPI00414915.1 SWISS-PROT:P6158 |                  |         |   | 0.9  | 8.1   | 0.0      |           | 0   |       |       |
| 19287468 - 1                       | R.WCLQVYPTAPKR.Q | 1519.77 | 2 | 0.04 | 2.492 | 0.609    | 380.1     | 2   | 13/33 | 3     |

---

1 of 1 peptide matches reported, 0 removed due to filtering

DTA for scans: 19287468-1  
Precursor ion: 760.38  
Mass type: mono  
Mod's: (M\* +15.99492) C=161.01468

Ion series for charge: +1

| AA | A ions        | B ions         | B* ions | Bo ions | C ions | Y ions         | Y* ions | Yo ions | Z ions |
|----|---------------|----------------|---------|---------|--------|----------------|---------|---------|--------|
| W  | 159.09        | 187.09         |         |         |        |                |         |         |        |
| C  | 320.11        | <b>348.10</b>  |         |         |        | 1333.69        |         |         |        |
| L  | <b>433.19</b> | <b>461.19</b>  |         |         |        | <b>1172.68</b> |         |         |        |
| Q  | <b>561.25</b> | <b>589.24</b>  |         |         |        | <b>1059.59</b> |         |         |        |
| V  | <b>660.32</b> | 688.31         |         |         |        | <b>931.54</b>  |         |         |        |
| Y  | 823.38        | 851.38         |         |         |        | 832.47         |         |         |        |
| P  | 920.43        | 948.43         |         |         |        | <b>669.40</b>  |         |         |        |
| T  | 1021.48       | 1049.48        |         |         |        | <b>572.35</b>  |         |         |        |
| A  | 1092.52       | 1120.51        |         |         |        | 471.30         |         |         |        |
| P  | 1189.57       | 1217.57        |         |         |        | 400.27         |         |         |        |
| K  | 1317.67       | <b>1345.66</b> |         |         |        | <b>303.21</b>  |         |         |        |
| R  |               |                |         |         |        | 175.12         |         |         |        |



#19287468-1 NL: 6.47E4





---

| Reference                          |                  |         |   | P    | Score | Coverage | Accession |     |       |       |
|------------------------------------|------------------|---------|---|------|-------|----------|-----------|-----|-------|-------|
| Scan(s)                            | Sequence         | MH+     | z | P    | XC    | DeltaCn  | Sp        | RSp | Ions  | Count |
| IPI:IPI00414916.3 SWISS-PROT:P6158 |                  |         |   | 0.9  | 8.1   | 0.0      |           | 0   |       |       |
| 19287468 - 1                       | R.WCLQVYPTAPKR.Q | 1519.77 | 2 | 0.04 | 2.492 | 0.609    | 380.1     | 2   | 13/33 | 3     |

1 of 1 peptide matches reported, 0 removed due to filtering

DTA for scans: 19287468-1  
Precursor ion: 760.38  
Mass type: mono  
Mod's: (M\* +15.99492) C=161.01468

Ion series for charge: +1

| AA | A ions        | B ions         | B* ions | Bo ions | C ions | Y ions         | Y* ions | Yo ions | Z ions |
|----|---------------|----------------|---------|---------|--------|----------------|---------|---------|--------|
| W  | 159.09        | 187.09         |         |         |        |                |         |         |        |
| C  | 320.11        | <b>348.10</b>  |         |         |        | 1333.69        |         |         |        |
| L  | <b>433.19</b> | <b>461.19</b>  |         |         |        | <b>1172.68</b> |         |         |        |
| Q  | <b>561.25</b> | <b>589.24</b>  |         |         |        | <b>1059.59</b> |         |         |        |
| V  | <b>660.32</b> | 688.31         |         |         |        | <b>931.54</b>  |         |         |        |
| Y  | 823.38        | 851.38         |         |         |        | 832.47         |         |         |        |
| P  | 920.43        | 948.43         |         |         |        | <b>669.40</b>  |         |         |        |
| T  | 1021.48       | 1049.48        |         |         |        | <b>572.35</b>  |         |         |        |
| A  | 1092.52       | 1120.51        |         |         |        | 471.30         |         |         |        |
| P  | 1189.57       | 1217.57        |         |         |        | 400.27         |         |         |        |
| K  | 1317.67       | <b>1345.66</b> |         |         |        | <b>303.21</b>  |         |         |        |
| R  |               |                |         |         |        | 175.12         |         |         |        |



#19287468-1 NL: 6.47E4



---

| Reference                          |                  |         |   | P    | Score | Coverage | Accession |     |       |       |
|------------------------------------|------------------|---------|---|------|-------|----------|-----------|-----|-------|-------|
| Scan(s)                            | Sequence         | MH+     | z | P    | XC    | DeltaCn  | Sp        | RSp | Ions  | Count |
| IPI:IPI00414917.1 SWISS-PROT:P6158 |                  |         |   | 0.9  | 8.1   | 0.0      | 0         |     |       |       |
| 19287468 - 1                       | R.WCLQVYPTAPKR.Q | 1519.77 | 2 | 0.04 | 2.492 | 0.609    | 380.1     | 2   | 13/33 | 3     |

1 of 1 peptide matches reported, 0 removed due to filtering

DTA for scans: 19287468-1  
Precursor ion: 760.38  
Mass type: mono  
Mod's: (M\* +15.99492) C=161.01468

Ion series for charge: +1

| AA | A ions        | B ions         | B* ions | Bo ions | C ions | Y ions         | Y* ions | Yo ions | Z ions |
|----|---------------|----------------|---------|---------|--------|----------------|---------|---------|--------|
| W  | 159.09        | 187.09         |         |         |        |                |         |         |        |
| C  | 320.11        | <b>348.10</b>  |         |         |        | 1333.69        |         |         |        |
| L  | <b>433.19</b> | <b>461.19</b>  |         |         |        | <b>1172.68</b> |         |         |        |
| Q  | <b>561.25</b> | <b>589.24</b>  |         |         |        | <b>1059.59</b> |         |         |        |
| V  | <b>660.32</b> | 688.31         |         |         |        | <b>931.54</b>  |         |         |        |
| Y  | 823.38        | 851.38         |         |         |        | 832.47         |         |         |        |
| P  | 920.43        | 948.43         |         |         |        | <b>669.40</b>  |         |         |        |
| T  | 1021.48       | 1049.48        |         |         |        | <b>572.35</b>  |         |         |        |
| A  | 1092.52       | 1120.51        |         |         |        | 471.30         |         |         |        |
| P  | 1189.57       | 1217.57        |         |         |        | 400.27         |         |         |        |
| K  | 1317.67       | <b>1345.66</b> |         |         |        | <b>303.21</b>  |         |         |        |
| R  |               |                |         |         |        | 175.12         |         |         |        |



#19287468-1 NL: 6.47E4



---

| Reference                                                      |               |         |   | P    | Score | Coverage | Accession |     |       |       |
|----------------------------------------------------------------|---------------|---------|---|------|-------|----------|-----------|-----|-------|-------|
| Scan(s)                                                        | Sequence      | MH+     | z | P    | XC    | DeltaCn  | Sp        | RSp | Ions  | Count |
| IPI:IPI00021727.1 SWISS-PROT:P04003 TREMBL:B4E1D8;B4E1E1;Q5VVQ |               |         |   | 1    | 10.1  | 0.0      | 0         |     |       |       |
| 19287468 - 1                                                   | K.YTCLPGYVR.S | 1129.53 | 2 | 0.05 | 2.580 | 0.512    | 346.1     | 1   | 12/24 | 3     |

1 of 1 peptide matches reported, 0 removed due to filtering

DTA for scans: 19287468-1  
Precursor ion: 565.27  
Mass type: mono  
Mod's: (M\* +15.99492) C=161.01468

Ion series for charge: +1

| AA | A ions        | B ions        | B* ions | Bo ions | C ions | Y ions        | Y* ions | Yo ions | Z ions |
|----|---------------|---------------|---------|---------|--------|---------------|---------|---------|--------|
| Y  | 136.08        | 164.07        |         |         |        |               |         |         |        |
| T  | <b>237.12</b> | <b>265.12</b> |         |         |        | <b>966.47</b> |         |         |        |
| C  | 398.14        | <b>426.13</b> |         |         |        | <b>865.42</b> |         |         |        |
| L  | <b>511.22</b> | <b>539.22</b> |         |         |        | <b>704.41</b> |         |         |        |
| P  | 608.27        | 636.27        |         |         |        | <b>591.32</b> |         |         |        |
| G  | 665.30        | 693.29        |         |         |        | <b>494.27</b> |         |         |        |
| Y  | 828.36        | 856.35        |         |         |        | 437.25        |         |         |        |
| V  | 927.43        | 955.42        |         |         |        | <b>274.19</b> |         |         |        |
| R  |               |               |         |         |        | <b>175.12</b> |         |         |        |



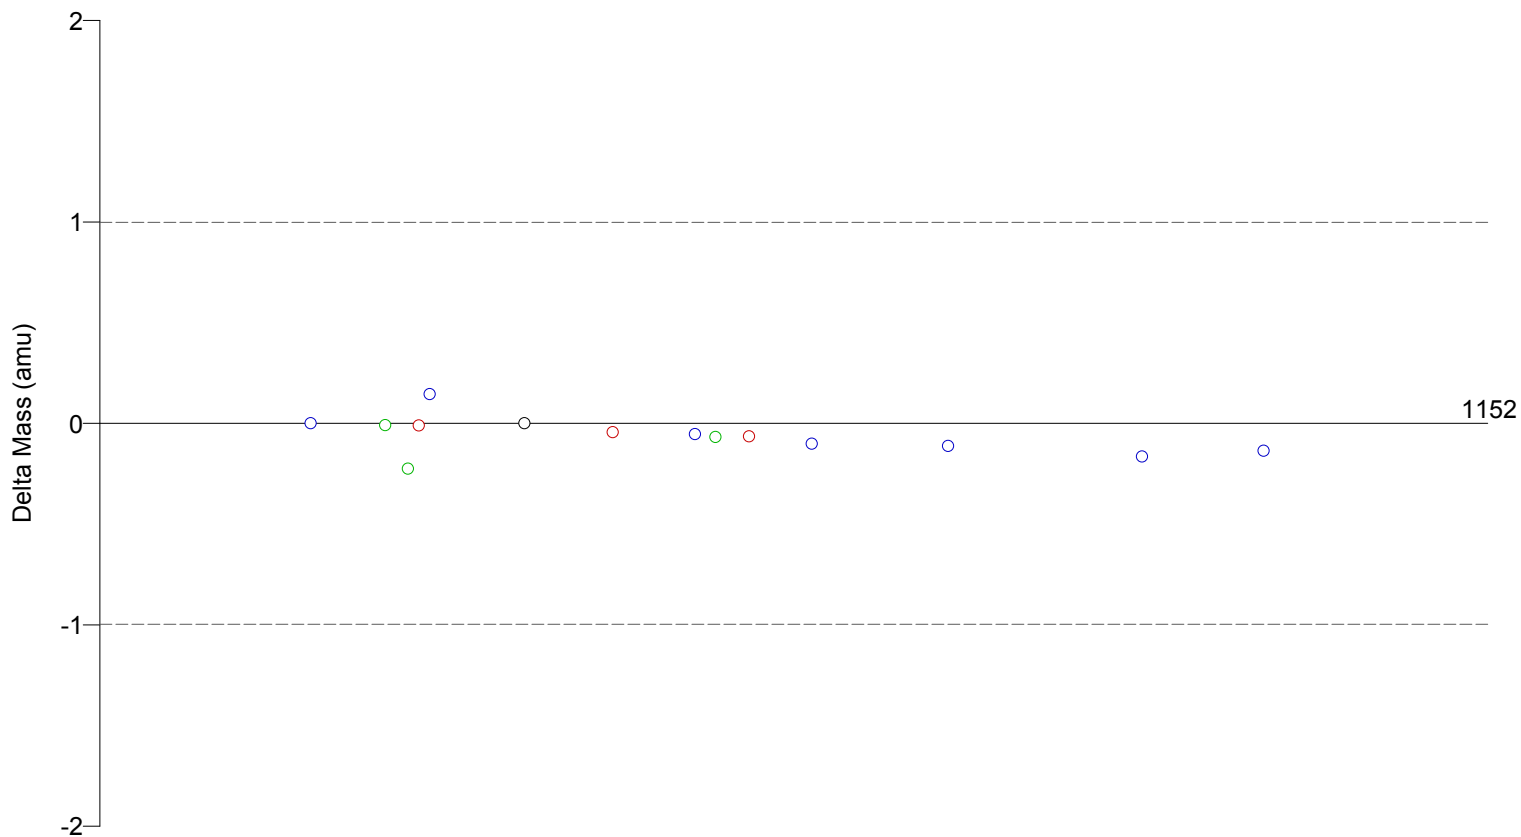

#19287468-1 NL: 1.65E5

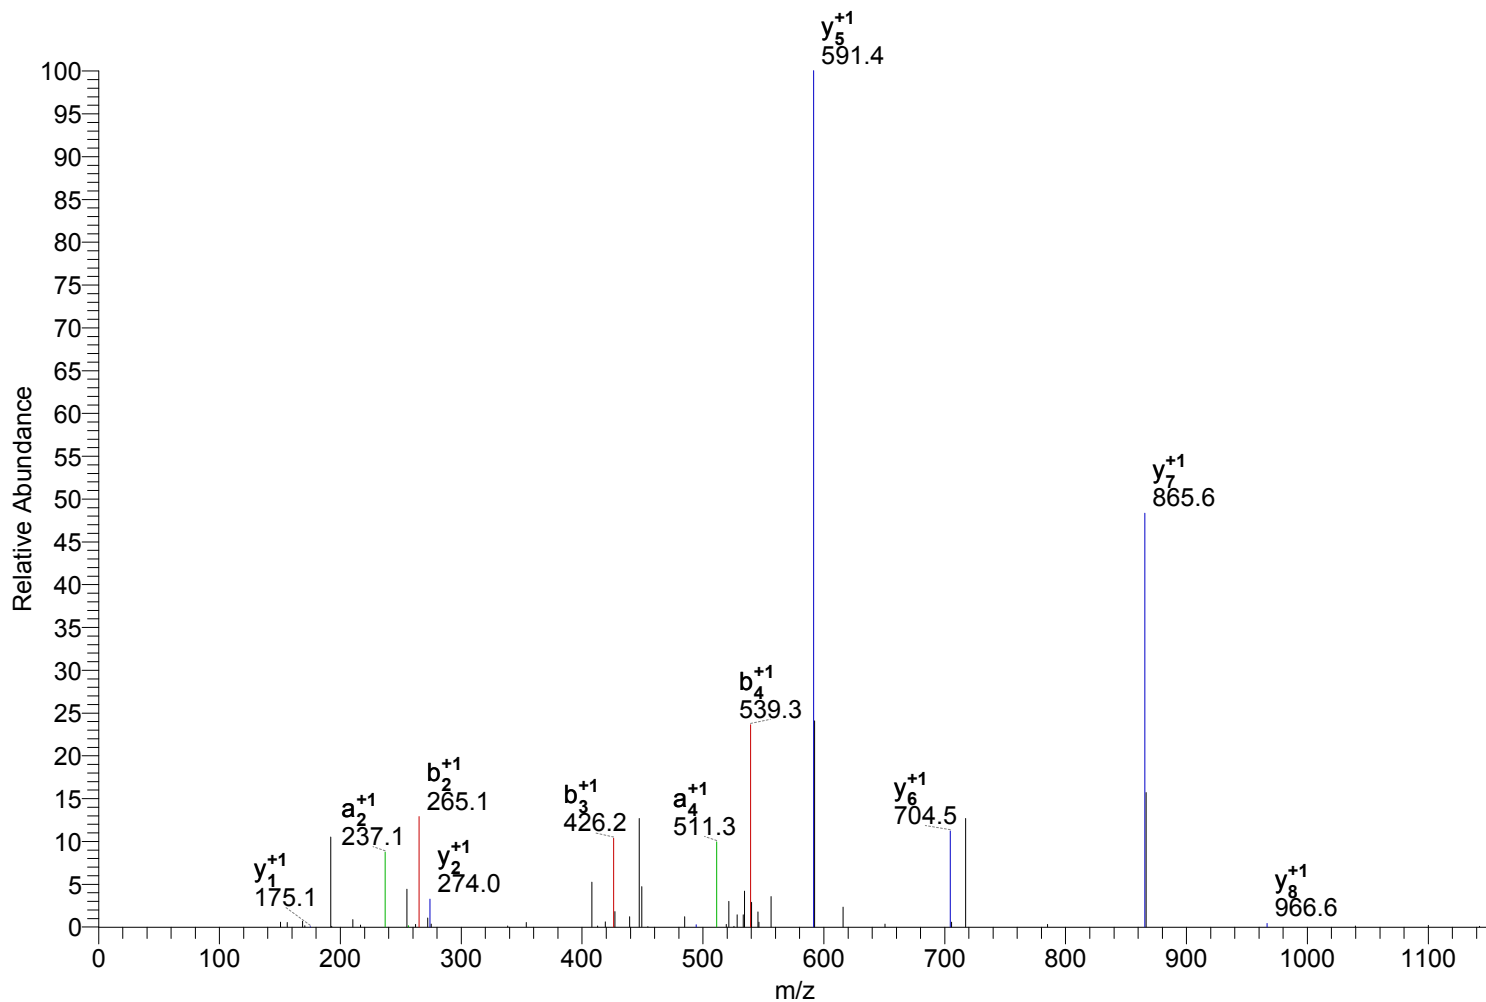

---

| Reference                          |               |         |   | P    | Score | Coverage | Accession |     |       |       |
|------------------------------------|---------------|---------|---|------|-------|----------|-----------|-----|-------|-------|
| Scan(s)                            | Sequence      | MH+     | z | P    | XC    | DeltaCn  | Sp        | RSp | Ions  | Count |
| IPI:IPI00855766.1 VEGA:OTTHUMP0000 |               |         |   | 1    | 10.1  | 0.0      | 0         |     |       |       |
| 19287468 - 1                       | K.YTCLPGYVR.S | 1129.53 | 2 | 0.05 | 2.580 | 0.512    | 346.1     | 1   | 12/24 | 3     |

1 of 1 peptide matches reported, 0 removed due to filtering

DTA for scans: 19287468-1  
Precursor ion: 565.27  
Mass type: mono  
Mod's: (M\* +15.99492) C=161.01468

Ion series for charge: +1

| AA | A ions        | B ions        | B* ions | Bo ions | C ions | Y ions        | Y* ions | Yo ions | Z ions |
|----|---------------|---------------|---------|---------|--------|---------------|---------|---------|--------|
| Y  | 136.08        | 164.07        |         |         |        |               |         |         |        |
| T  | <b>237.12</b> | <b>265.12</b> |         |         |        | <b>966.47</b> |         |         |        |
| C  | 398.14        | <b>426.13</b> |         |         |        | <b>865.42</b> |         |         |        |
| L  | <b>511.22</b> | <b>539.22</b> |         |         |        | <b>704.41</b> |         |         |        |
| P  | 608.27        | 636.27        |         |         |        | <b>591.32</b> |         |         |        |
| G  | 665.30        | 693.29        |         |         |        | <b>494.27</b> |         |         |        |
| Y  | 828.36        | 856.35        |         |         |        | 437.25        |         |         |        |
| V  | 927.43        | 955.42        |         |         |        | <b>274.19</b> |         |         |        |
| R  |               |               |         |         |        | <b>175.12</b> |         |         |        |



#19287468-1 NL: 1.65E5



---

| Reference                          |               |         |   | P    | Score | Coverage | Accession |     |       |       |
|------------------------------------|---------------|---------|---|------|-------|----------|-----------|-----|-------|-------|
| Scan(s)                            | Sequence      | MH+     | z | P    | XC    | DeltaCn  | Sp        | RSp | Ions  | Count |
| IPI:IPI00872510.1 TREMBL:A8MVU6 EN |               |         |   | 1    | 10.1  | 0.0      | 0         |     |       |       |
| 19287468 - 1                       | K.YTCLPGYVR.S | 1129.53 | 2 | 0.05 | 2.580 | 0.512    | 346.1     | 1   | 12/24 | 3     |

1 of 1 peptide matches reported, 0 removed due to filtering

DTA for scans: 19287468-1  
Precursor ion: 565.27  
Mass type: mono  
Mod's: (M\* +15.99492) C=161.01468

Ion series for charge: +1

| AA | A ions        | B ions        | B* ions | Bo ions | C ions | Y ions        | Y* ions | Yo ions | Z ions |
|----|---------------|---------------|---------|---------|--------|---------------|---------|---------|--------|
| Y  | 136.08        | 164.07        |         |         |        |               |         |         |        |
| T  | <b>237.12</b> | <b>265.12</b> |         |         |        | <b>966.47</b> |         |         |        |
| C  | 398.14        | <b>426.13</b> |         |         |        | <b>865.42</b> |         |         |        |
| L  | <b>511.22</b> | <b>539.22</b> |         |         |        | <b>704.41</b> |         |         |        |
| P  | 608.27        | 636.27        |         |         |        | <b>591.32</b> |         |         |        |
| G  | 665.30        | 693.29        |         |         |        | <b>494.27</b> |         |         |        |
| Y  | 828.36        | 856.35        |         |         |        | 437.25        |         |         |        |
| V  | 927.43        | 955.42        |         |         |        | <b>274.19</b> |         |         |        |
| R  |               |               |         |         |        | <b>175.12</b> |         |         |        |



#19287468-1 NL: 1.65E5



---

| Reference                          |               |         |   | P    | Score | Coverage | Accession |     |       |       |
|------------------------------------|---------------|---------|---|------|-------|----------|-----------|-----|-------|-------|
| Scan(s)                            | Sequence      | MH+     | z | P    | XC    | DeltaCn  | Sp        | RSp | Ions  | Count |
| IPI:IPI00880200.1 TREMBL:A6PVY5 VE |               |         |   | 1    | 10.1  | 0.0      | 0         |     |       |       |
| 19287468 - 1                       | K.YTCLPGYVR.S | 1129.53 | 2 | 0.05 | 2.580 | 0.512    | 346.1     | 1   | 12/24 | 3     |

1 of 1 peptide matches reported, 0 removed due to filtering



DTA for scans: 19287468-1  
Precursor ion: 565.27  
Mass type: mono  
Mod's: (M\* +15.99492) C=161.01468

Ion series for charge: +1

| AA | A ions        | B ions        | B* ions | Bo ions | C ions | Y ions        | Y* ions | Yo ions | Z ions |
|----|---------------|---------------|---------|---------|--------|---------------|---------|---------|--------|
| Y  | 136.08        | 164.07        |         |         |        |               |         |         |        |
| T  | <b>237.12</b> | <b>265.12</b> |         |         |        | <b>966.47</b> |         |         |        |
| C  | 398.14        | <b>426.13</b> |         |         |        | <b>865.42</b> |         |         |        |
| L  | <b>511.22</b> | <b>539.22</b> |         |         |        | <b>704.41</b> |         |         |        |
| P  | 608.27        | 636.27        |         |         |        | <b>591.32</b> |         |         |        |
| G  | 665.30        | 693.29        |         |         |        | <b>494.27</b> |         |         |        |
| Y  | 828.36        | 856.35        |         |         |        | 437.25        |         |         |        |
| V  | 927.43        | 955.42        |         |         |        | <b>274.19</b> |         |         |        |
| R  |               |               |         |         |        | <b>175.12</b> |         |         |        |



#19287468-1 NL: 1.65E5



---

| Reference                                                      |               |         |   | P    | Score | Coverage | Accession |     |       |       |
|----------------------------------------------------------------|---------------|---------|---|------|-------|----------|-----------|-----|-------|-------|
| Scan(s)                                                        | Sequence      | MH+     | z | P    | XC    | DeltaCn  | Sp        | RSp | Ions  | Count |
| IPI:IPI00473011.3 SWISS-PROT:P02042 TREMBL:A0N071 ENSEMBL:ENSP |               |         |   | 1    | 10.1  | 0.0      | 0         |     |       |       |
| 19287468 - 1                                                   | K.LHVDPENFR.L | 1126.56 | 2 | 0.06 | 2.171 | 0.417    | 654.7     | 1   | 14/24 | 5     |

1 of 1 peptide matches reported, 0 removed due to filtering

DTA for scans: 19287468-1  
Precursor ion: 563.79  
Mass type: mono  
Mod's: (M\* +15.99492) C=161.01468

Ion series for charge: +1

| AA | A ions        | B ions        | B* ions | Bo ions | C ions | Y ions        | Y* ions | Yo ions | Z ions |
|----|---------------|---------------|---------|---------|--------|---------------|---------|---------|--------|
| L  | 86.10         | 114.09        |         |         |        |               |         |         |        |
| H  | <b>223.16</b> | <b>251.15</b> |         |         |        | 1013.48       |         |         |        |
| V  | <b>322.22</b> | <b>350.22</b> |         |         |        | <b>876.42</b> |         |         |        |
| D  | 437.25        | <b>465.25</b> |         |         |        | <b>777.35</b> |         |         |        |
| P  | 534.30        | 562.30        |         |         |        | <b>662.33</b> |         |         |        |
| E  | <b>663.35</b> | <b>691.34</b> |         |         |        | 565.27        |         |         |        |
| N  | <b>777.39</b> | 805.38        |         |         |        | <b>436.23</b> |         |         |        |
| F  | 924.46        | 952.45        |         |         |        | <b>322.19</b> |         |         |        |
| R  |               |               |         |         |        | <b>175.12</b> |         |         |        |



#19287468-1 NL: 7.10E5



---

| Reference                          |               |         |   | P    | Score | Coverage | Accession |     |       |       |
|------------------------------------|---------------|---------|---|------|-------|----------|-----------|-----|-------|-------|
| Scan(s)                            | Sequence      | MH+     | z | P    | XC    | DeltaCn  | Sp        | RSp | Ions  | Count |
| IPI:IPI00657660.1 ENSEMBL:ENSP0000 |               |         |   | 1    | 10.1  | 0.0      | 0         |     |       |       |
| 19287468 - 1                       | K.LHVDPENFR.L | 1126.56 | 2 | 0.06 | 2.171 | 0.417    | 654.7     | 1   | 14/24 | 5     |

1 of 1 peptide matches reported, 0 removed due to filtering

DTA for scans: 19287468-1  
Precursor ion: 563.79  
Mass type: mono  
Mod's: (M\* +15.99492) C=161.01468

Ion series for charge: +1

| AA | A ions        | B ions        | B* ions | Bo ions | C ions | Y ions        | Y* ions | Yo ions | Z ions |
|----|---------------|---------------|---------|---------|--------|---------------|---------|---------|--------|
| L  | 86.10         | 114.09        |         |         |        |               |         |         |        |
| H  | <b>223.16</b> | <b>251.15</b> |         |         |        | 1013.48       |         |         |        |
| V  | <b>322.22</b> | <b>350.22</b> |         |         |        | <b>876.42</b> |         |         |        |
| D  | 437.25        | <b>465.25</b> |         |         |        | <b>777.35</b> |         |         |        |
| P  | 534.30        | 562.30        |         |         |        | <b>662.33</b> |         |         |        |
| E  | <b>663.35</b> | <b>691.34</b> |         |         |        | 565.27        |         |         |        |
| N  | <b>777.39</b> | 805.38        |         |         |        | <b>436.23</b> |         |         |        |
| F  | 924.46        | 952.45        |         |         |        | <b>322.19</b> |         |         |        |
| R  |               |               |         |         |        | <b>175.12</b> |         |         |        |



#19287468-1 NL: 7.10E5





---

| Reference                          |               |         |   | P    | Score | Coverage | Accession |     |       |       |
|------------------------------------|---------------|---------|---|------|-------|----------|-----------|-----|-------|-------|
| Scan(s)                            | Sequence      | MH+     | z | P    | XC    | DeltaCn  | Sp        | RSp | Ions  | Count |
| IPI:IPI00796636.14 TREMBL:A9YUX2;B |               |         |   | 1    | 10.1  | 0.0      | 0         |     |       |       |
| 19287468 - 1                       | K.LHVDPENFR.L | 1126.56 | 2 | 0.06 | 2.171 | 0.417    | 654.7     | 1   | 14/24 | 5     |

1 of 1 peptide matches reported, 0 removed due to filtering

DTA for scans: 19287468-1  
Precursor ion: 563.79  
Mass type: mono  
Mod's: (M\* +15.99492) C=161.01468

Ion series for charge: +1

| AA | A ions        | B ions        | B* ions | Bo ions | C ions | Y ions        | Y* ions | Yo ions | Z ions |
|----|---------------|---------------|---------|---------|--------|---------------|---------|---------|--------|
| L  | 86.10         | 114.09        |         |         |        |               |         |         |        |
| H  | <b>223.16</b> | <b>251.15</b> |         |         |        | 1013.48       |         |         |        |
| V  | <b>322.22</b> | <b>350.22</b> |         |         |        | <b>876.42</b> |         |         |        |
| D  | 437.25        | <b>465.25</b> |         |         |        | <b>777.35</b> |         |         |        |
| P  | 534.30        | 562.30        |         |         |        | <b>662.33</b> |         |         |        |
| E  | <b>663.35</b> | <b>691.34</b> |         |         |        | 565.27        |         |         |        |
| N  | <b>777.39</b> | 805.38        |         |         |        | <b>436.23</b> |         |         |        |
| F  | 924.46        | 952.45        |         |         |        | <b>322.19</b> |         |         |        |
| R  |               |               |         |         |        | <b>175.12</b> |         |         |        |



#19287468-1 NL: 7.10E5



---

| Reference                          |               |         |   | P    | Score | Coverage | Accession |     |       |       |
|------------------------------------|---------------|---------|---|------|-------|----------|-----------|-----|-------|-------|
| Scan(s)                            | Sequence      | MH+     | z | P    | XC    | DeltaCn  | Sp        | RSp | Ions  | Count |
| IPI:IPI00829896.1 TREMBL:Q670S4 Ta |               |         |   | 1    | 10.1  | 0.0      | 0         |     |       |       |
| 19287468 - 1                       | K.LHVDPENFR.L | 1126.56 | 2 | 0.06 | 2.171 | 0.417    | 654.7     | 1   | 14/24 | 5     |

1 of 1 peptide matches reported, 0 removed due to filtering

DTA for scans: 19287468-1  
Precursor ion: 563.79  
Mass type: mono  
Mod's: (M\* +15.99492) C=161.01468

Ion series for charge: +1

| AA | A ions        | B ions        | B* ions | Bo ions | C ions | Y ions        | Y* ions | Yo ions | Z ions |
|----|---------------|---------------|---------|---------|--------|---------------|---------|---------|--------|
| L  | 86.10         | 114.09        |         |         |        |               |         |         |        |
| H  | <b>223.16</b> | <b>251.15</b> |         |         |        | 1013.48       |         |         |        |
| V  | <b>322.22</b> | <b>350.22</b> |         |         |        | <b>876.42</b> |         |         |        |
| D  | 437.25        | <b>465.25</b> |         |         |        | <b>777.35</b> |         |         |        |
| P  | 534.30        | 562.30        |         |         |        | <b>662.33</b> |         |         |        |
| E  | <b>663.35</b> | <b>691.34</b> |         |         |        | 565.27        |         |         |        |
| N  | <b>777.39</b> | 805.38        |         |         |        | <b>436.23</b> |         |         |        |
| F  | 924.46        | 952.45        |         |         |        | <b>322.19</b> |         |         |        |
| R  |               |               |         |         |        | <b>175.12</b> |         |         |        |



#19287468-1 NL: 7.10E5



---

| Reference                                                      |                         |         |   | P | Score | Coverage | Accession |     |        |       |
|----------------------------------------------------------------|-------------------------|---------|---|---|-------|----------|-----------|-----|--------|-------|
| Scan(s)                                                        | Sequence                | MH+     | z | P | XC    | DeltaCn  | Sp        | RSp | Ions   | Count |
| IPI:IPI00871791.2 SWISS-PROT:Q96NG8 TREMBL:B4DQZ9;B7Z9R3 ENSEM |                         |         |   | 1 | 8.1   | 0.0      | 0         |     |        |       |
| 19287468 - 1                                                   | R.VSHLTVHYRIHTGKPYECK.E | 2455.22 | 3 | 1 | 2.157 | 0.637    | 199.9     | 2   | 17/114 |       |

1 of 1 peptide matches reported, 0 removed due to filtering

DTA for scans: 19287468-1  
Precursor ion: 819.06  
Mass type: mono  
Mod's: (M\* +15.99492) C=161.01468

Ion series for charge: +1

| AA | A ions  | B ions  | B* ions | Bo ions | C ions | Y ions  | Y* ions | Yo ions | Z ions |
|----|---------|---------|---------|---------|--------|---------|---------|---------|--------|
| V  | 72.08   | 100.08  |         |         |        |         |         |         |        |
| S  | 159.11  | 187.11  |         |         |        | 2356.15 |         |         |        |
| H  | 296.17  | 324.17  |         |         |        | 2269.12 |         |         |        |
| L  | 409.26  | 437.25  |         |         |        | 2132.06 |         |         |        |
| T  | 510.30  | 538.30  |         |         |        | 2018.98 |         |         |        |
| V  | 609.37  | 637.37  |         |         |        | 1917.93 |         |         |        |
| H  | 746.43  | 774.43  |         |         |        | 1818.86 |         |         |        |
| Y  | 909.49  | 937.49  |         |         |        | 1681.80 |         |         |        |
| R  | 1065.60 | 1093.59 |         |         |        | 1518.74 |         |         |        |
| I  | 1178.68 | 1206.67 |         |         |        | 1362.64 |         |         |        |
| H  | 1315.74 | 1343.73 |         |         |        | 1249.55 |         |         |        |
| T  | 1416.79 | 1444.78 |         |         |        | 1112.49 |         |         |        |
| G  | 1473.81 | 1501.80 |         |         |        | 1011.45 |         |         |        |
| E  | 1602.85 | 1630.84 |         |         |        | 954.42  |         |         |        |
| K  | 1730.94 | 1758.94 |         |         |        | 825.38  |         |         |        |
| P  | 1828.00 | 1855.99 |         |         |        | 697.29  |         |         |        |
| Y  | 1991.06 | 2019.06 |         |         |        | 600.23  |         |         |        |
| E  | 2120.10 | 2148.10 |         |         |        | 437.17  |         |         |        |
| C  | 2281.12 | 2309.11 |         |         |        | 308.13  |         |         |        |
| K  |         |         |         |         |        | 147.11  |         |         |        |



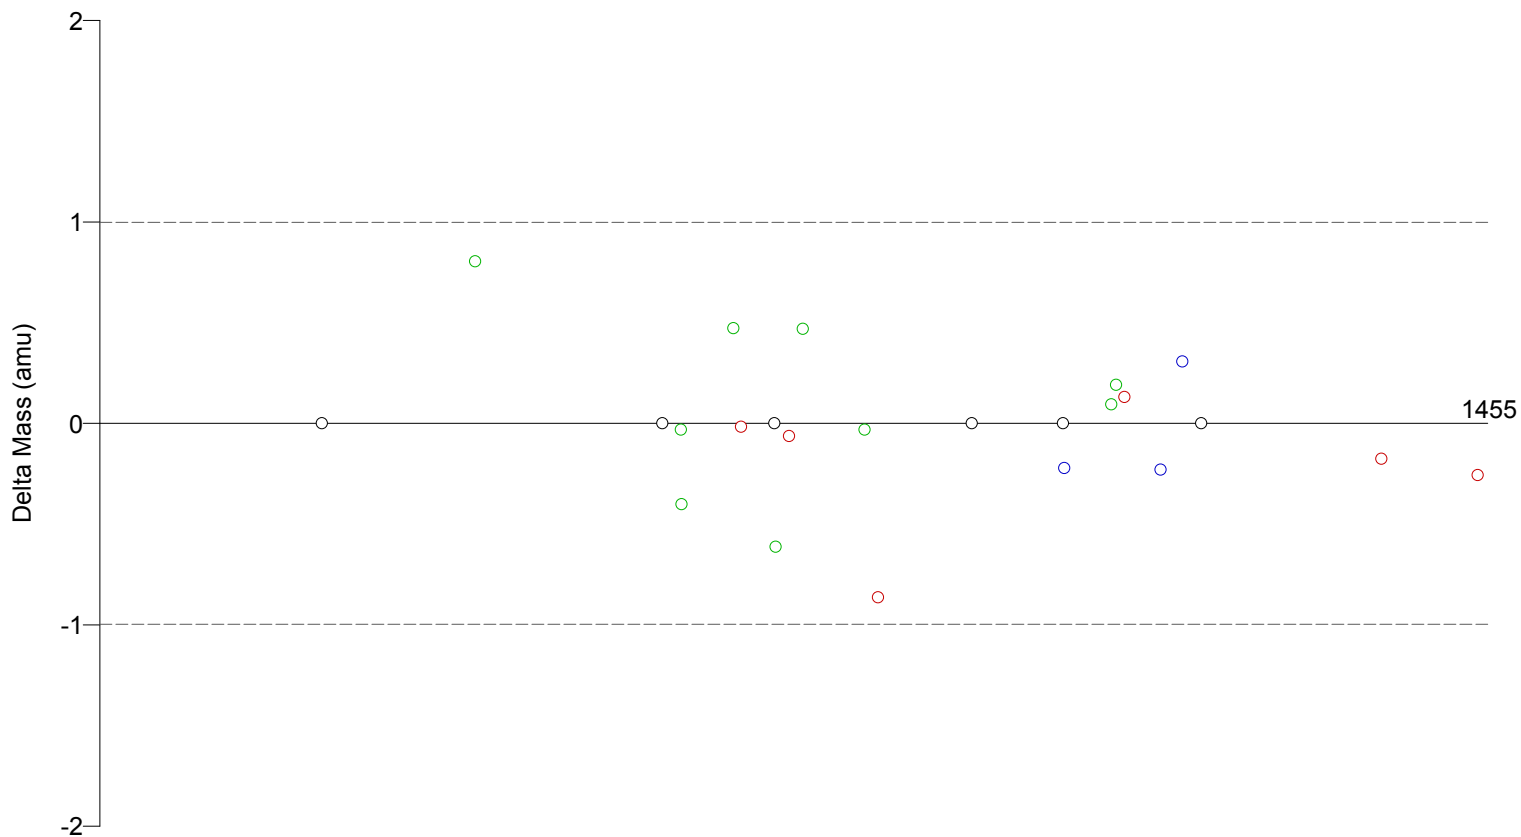

#19287468-1 NL: 6.24E5

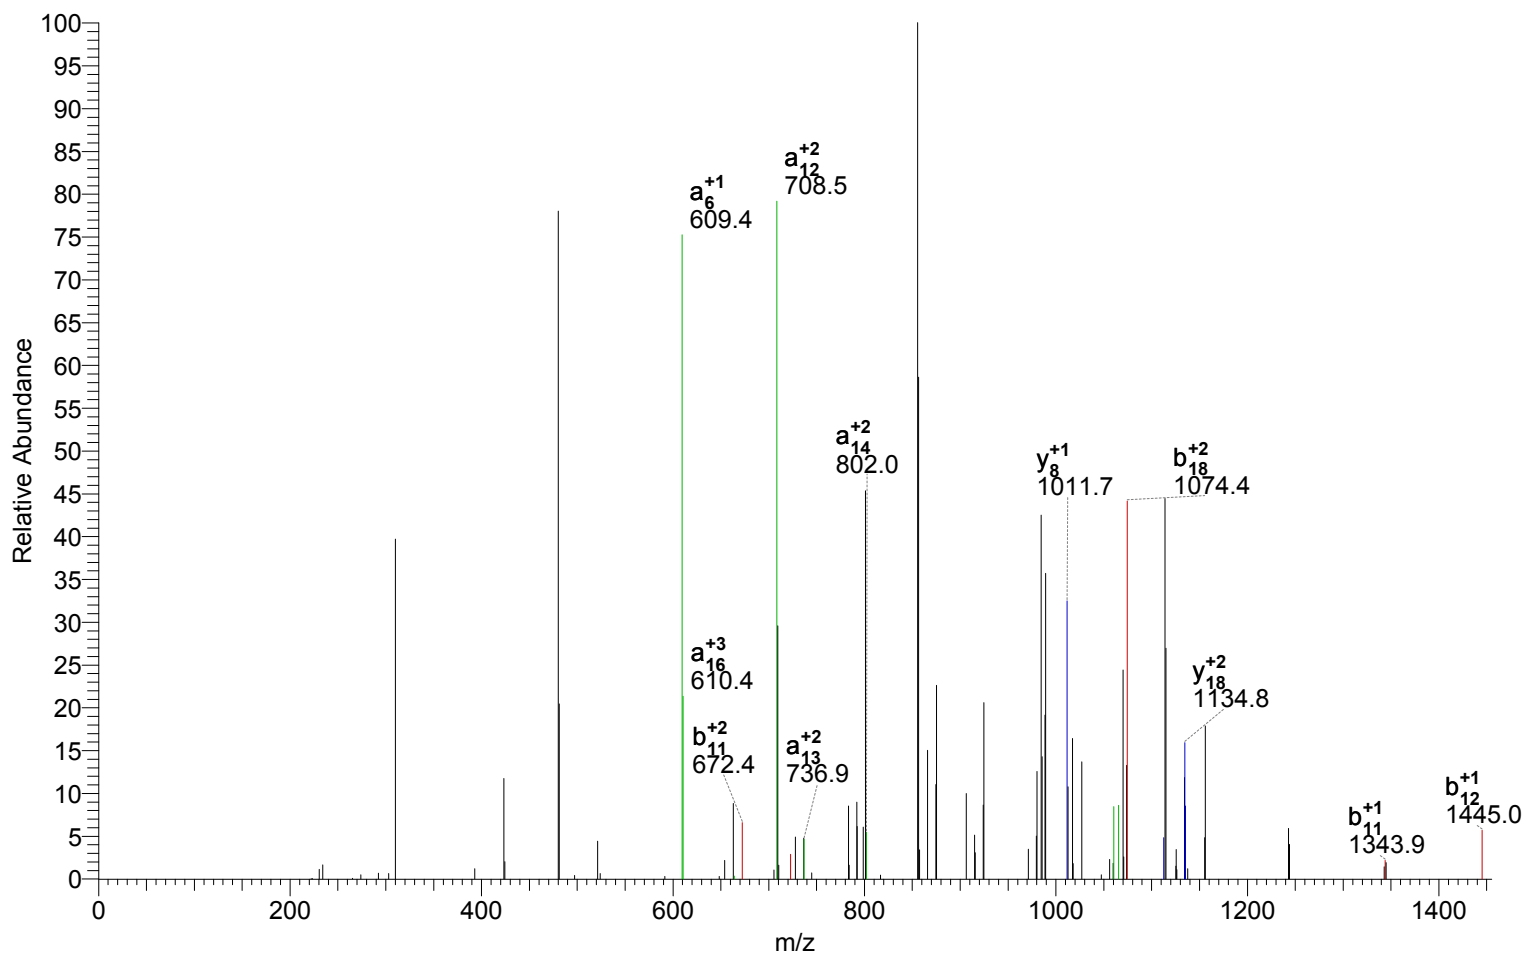

---

| Reference                             |                          |        |   | P    | Score | Coverage | Accession |     |       |       |
|---------------------------------------|--------------------------|--------|---|------|-------|----------|-----------|-----|-------|-------|
| Scan(s)                               | Sequence                 | MH+    | z | P    | XC    | DeltaCn  | Sp        | RSp | Ions  | Count |
| IPI:IPI00888034.1 REFSEQ:XP_001732886 | Tax_Id=9606 Gene_Symbol= |        | 1 |      | 8.1   | 0.0      | 0         |     |       |       |
| 19287468 - 1                          | K.VXXPCXR.R              | 871.51 | 2 | 0.06 | 1.526 | 0.312    | 361.0     | 2   | 11/18 |       |

1 of 1 peptide matches reported, 0 removed due to filtering

DTA for scans: 19287468-1  
Precursor ion: 436.25  
Mass type: mono  
Mod's: (M\* +15.99492) C=161.01468

Ion series for charge: +1

| AA | A ions        | B ions        | B* ions | Bo ions | C ions | Y ions        | Y* ions | Yo ions | Z ions |
|----|---------------|---------------|---------|---------|--------|---------------|---------|---------|--------|
| V  | 72.08         | 100.08        |         |         |        |               |         |         |        |
| X  | <b>185.16</b> | <b>213.16</b> |         |         |        | <b>772.44</b> |         |         |        |
| X  | 298.25        | 326.24        |         |         |        | <b>659.35</b> |         |         |        |
| P  | <b>395.30</b> | 423.30        |         |         |        | 546.27        |         |         |        |
| C  | 556.32        | <b>584.31</b> |         |         |        | 449.22        |         |         |        |
| X  | 669.40        | 697.40        |         |         |        | <b>288.20</b> |         |         |        |
| R  |               |               |         |         |        | <b>175.12</b> |         |         |        |

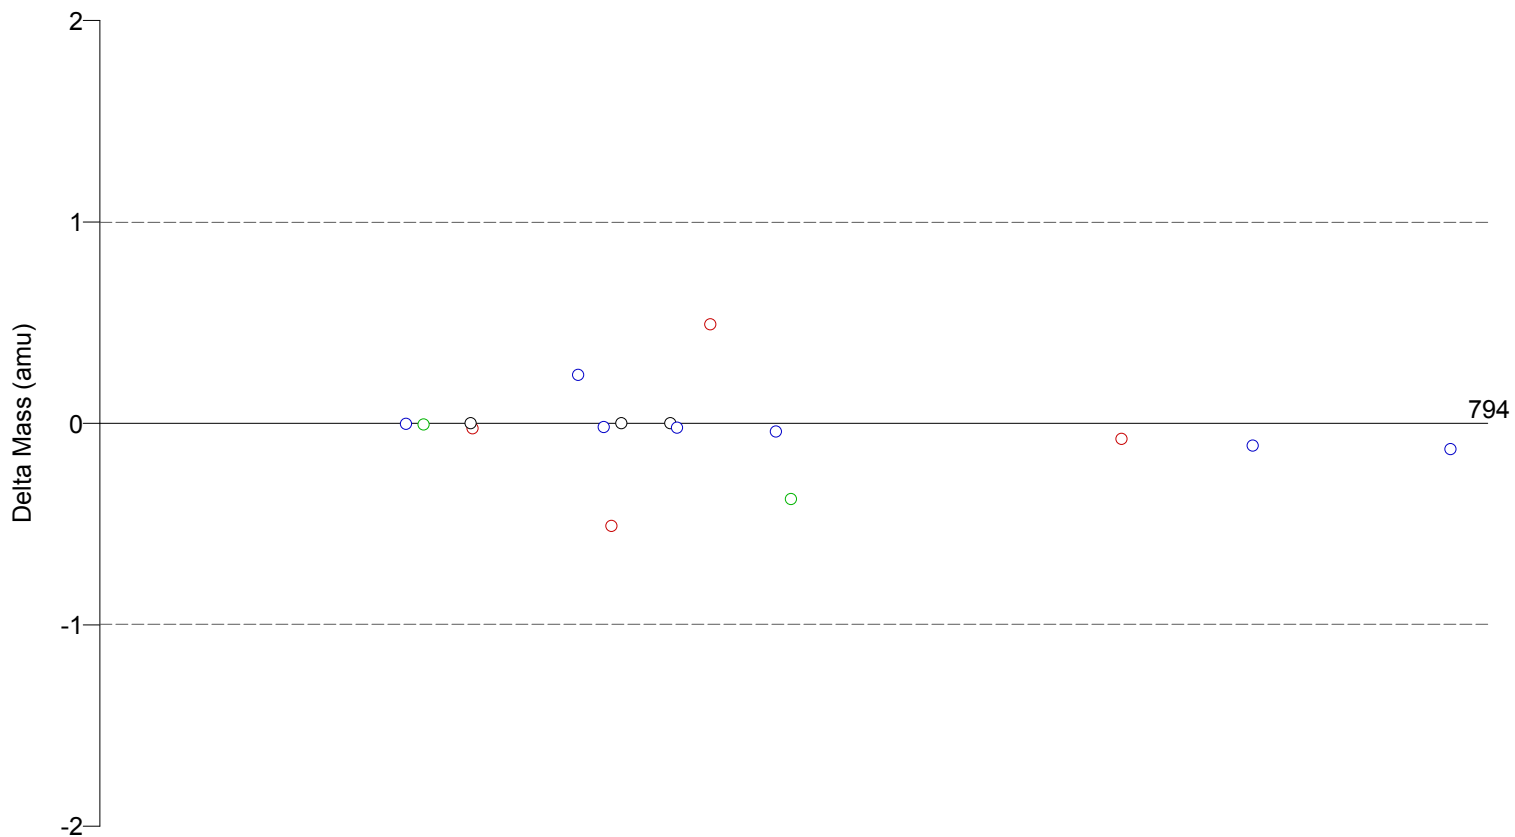

#19287468-1 NL: 5.11E5

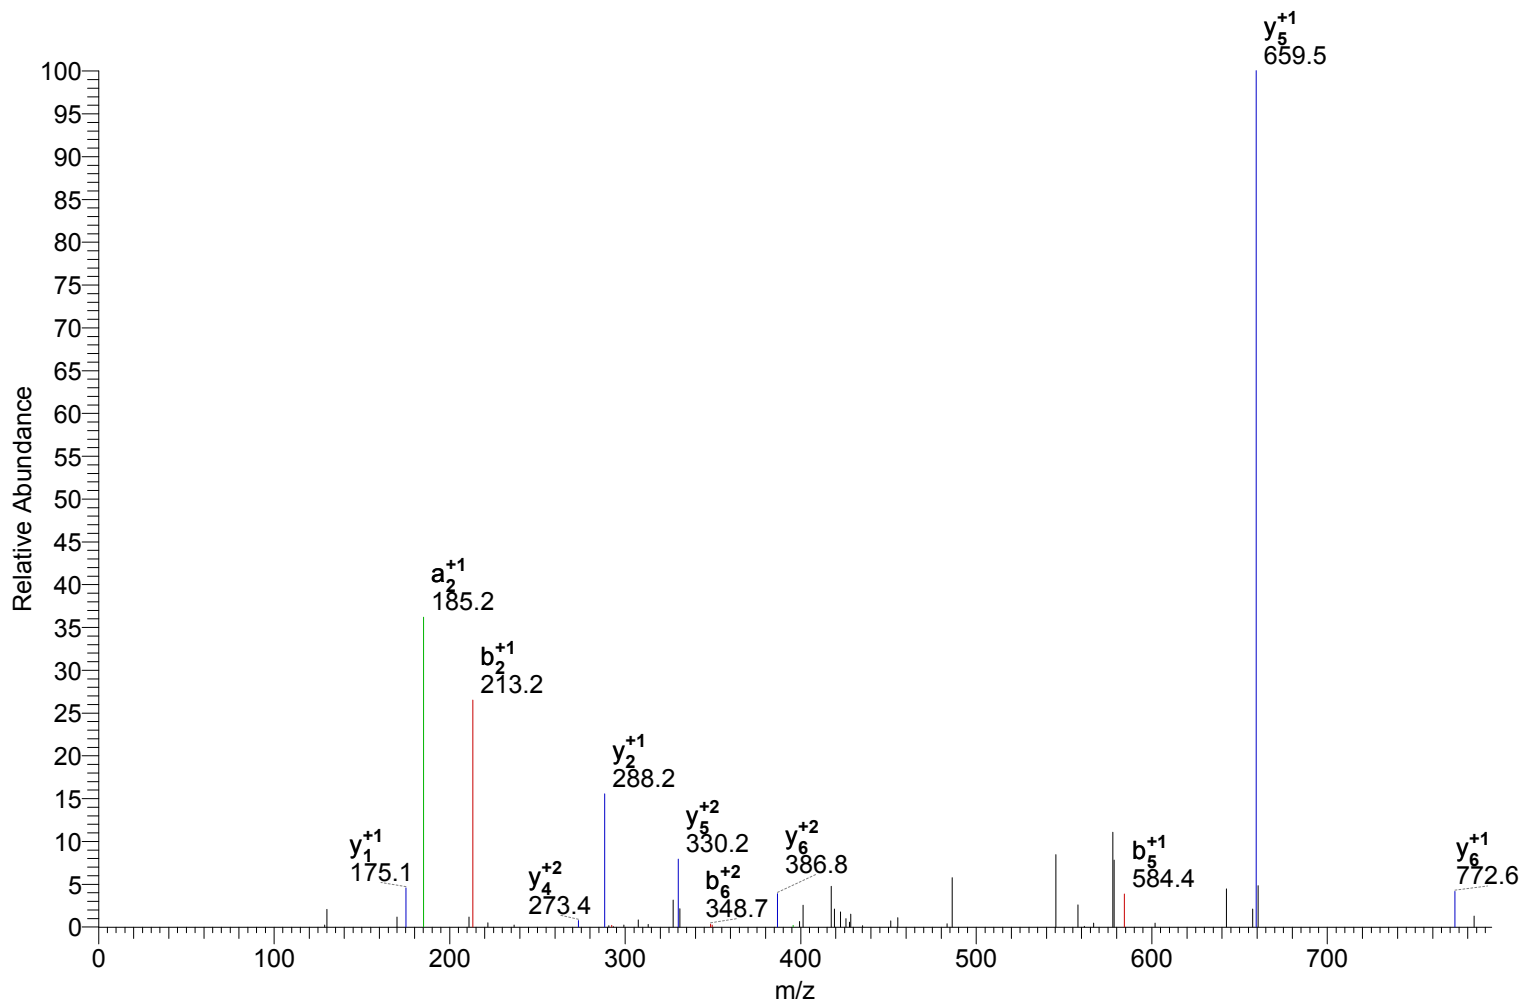

---

| Reference                                                      |                  |         |   | P | Score | Coverage | Accession |     |      |       |  |
|----------------------------------------------------------------|------------------|---------|---|---|-------|----------|-----------|-----|------|-------|--|
| Scan(s)                                                        | Sequence         | MH+     | z | P | XC    | DeltaCn  | Sp        | RSp | Ions | Count |  |
| IPI:IPI00021274.2 SWISS-PROT:P29322 ENSEMBL:ENSP00000166244 RE |                  |         |   | 1 | 8.1   | 0.0      |           | 0   |      |       |  |
| 19287468 - 1                                                   | R.ALGITLM*GHQK.K | 1184.65 | 2 | 1 | 1.470 | 0.526    | 80.2      | 12  | 6/30 |       |  |

1 of 1 peptide matches reported, 0 removed due to filtering

DTA for scans: 19287468-1  
Precursor ion: 592.83  
Mass type: mono  
Mod's: (M\* +15.99492) C=161.01468

Ion series for charge: +1

| AA | A ions  | B ions        | B* ions | Bo ions | C ions | Y ions        | Y* ions | Yo ions | Z ions |
|----|---------|---------------|---------|---------|--------|---------------|---------|---------|--------|
| A  | 44.05   | 72.04         |         |         |        |               |         |         |        |
| L  | 157.13  | 185.13        |         |         |        | 1113.61       |         |         |        |
| G  | 214.16  | <b>242.15</b> |         |         |        | 1000.52       |         |         |        |
| I  | 327.24  | <b>355.23</b> |         |         |        | <b>943.50</b> |         |         |        |
| T  | 428.29  | 456.28        |         |         |        | <b>830.42</b> |         |         |        |
| L  | 541.37  | 569.37        |         |         |        | 729.37        |         |         |        |
| M* | 688.41  | <b>716.40</b> |         |         |        | 616.29        |         |         |        |
| G  | 745.43  | 773.42        |         |         |        | <b>469.25</b> |         |         |        |
| H  | 882.49  | 910.48        |         |         |        | 412.23        |         |         |        |
| Q  | 1010.55 | 1038.54       |         |         |        | 275.17        |         |         |        |
| K  |         |               |         |         |        | 147.11        |         |         |        |

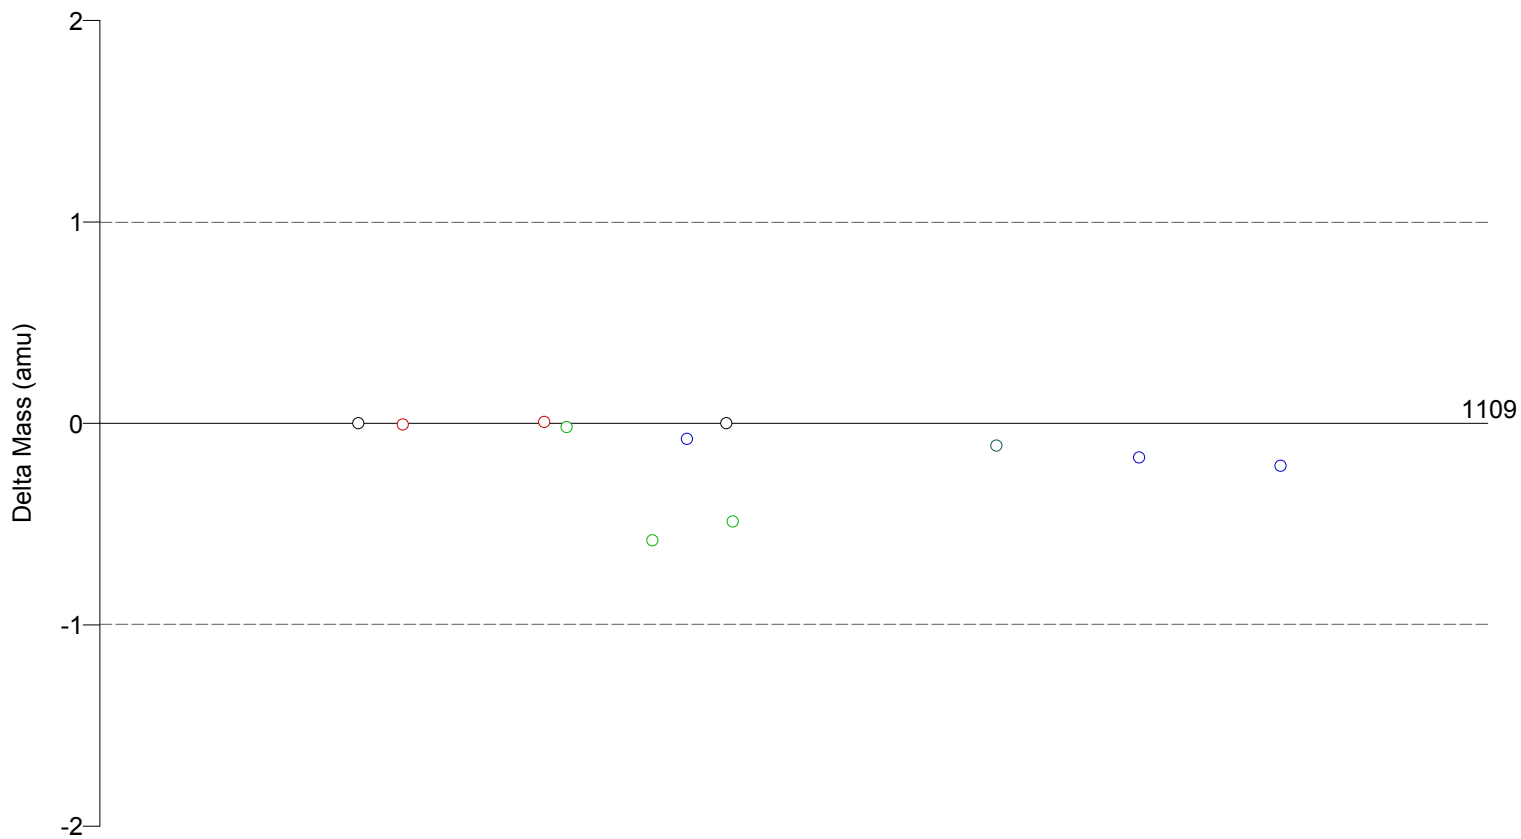

#19287468-1 NL: 1.66E5

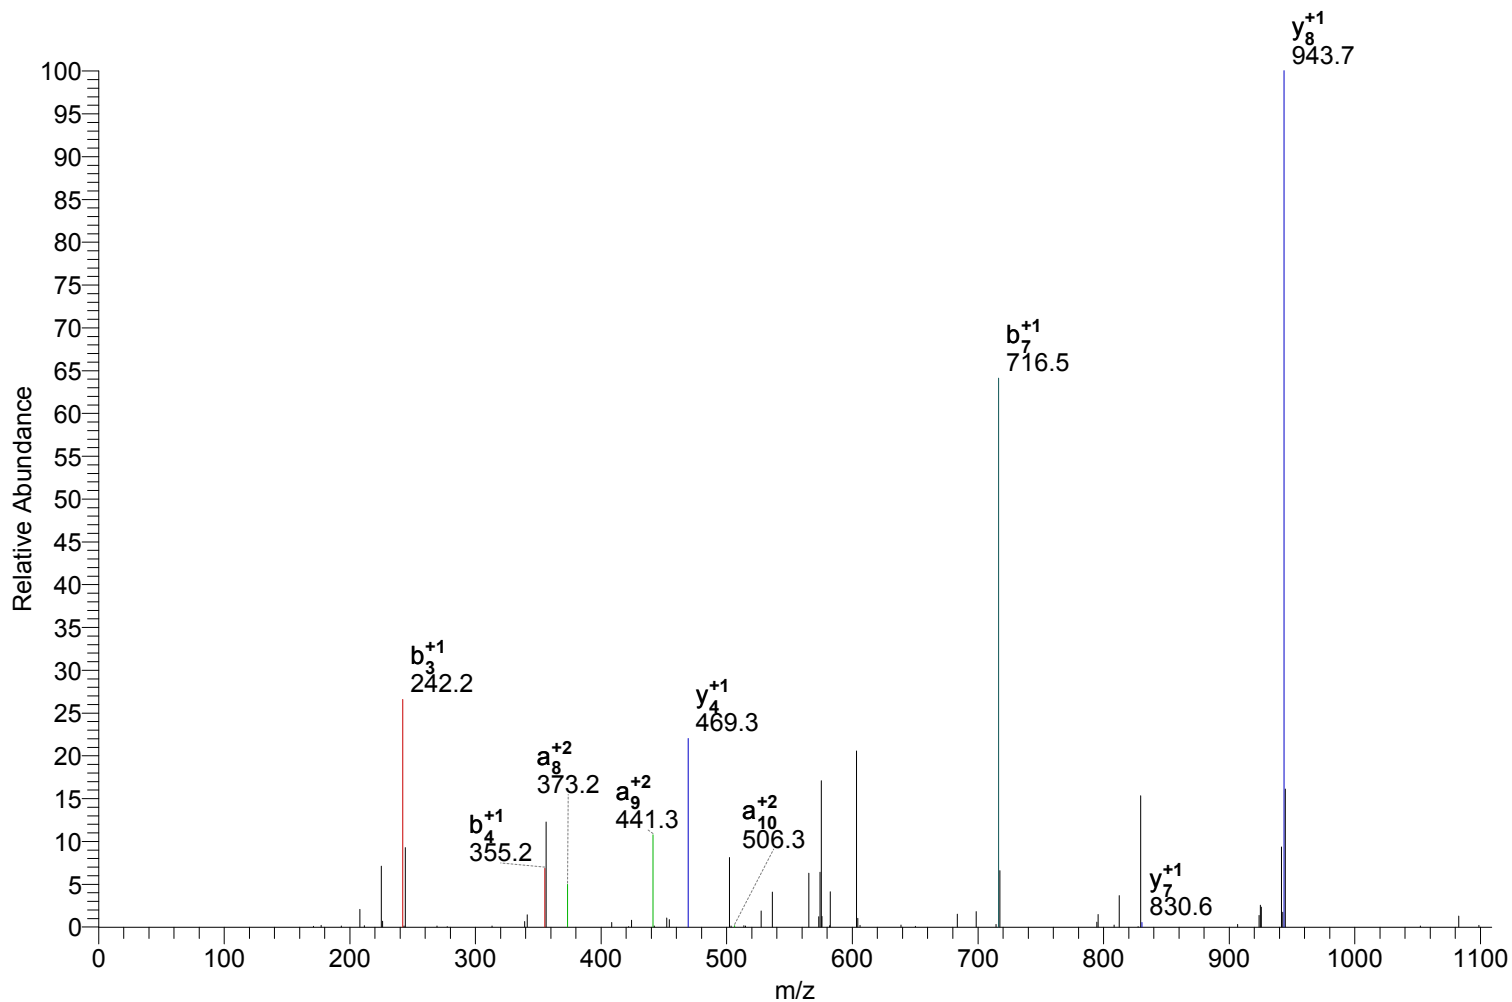

---

| Reference                                                      |                |         |   | P | Score | Coverage | Accession |        |      |       |
|----------------------------------------------------------------|----------------|---------|---|---|-------|----------|-----------|--------|------|-------|
| Scan(s)                                                        | Sequence       | MH+     | z | P | XC    | DeltaCn  | Sp        | RSp    | Ions | Count |
| gi 113580 sp P02770 ALBU_RAT SERUM ALBUMIN PRECURSOR. [MASS=68 |                |         |   | 1 | 8.1   | 0.0      |           | 113580 |      |       |
| 19287468 - 1                                                   | K.LVQEVTDFAK.T | 1149.62 | 2 | 1 | 2.007 | 0.529    | 95.0      | 6      | 8/27 |       |

---

1 of 1 peptide matches reported, 0 removed due to filtering



DTA for scans: 19287468-1  
Precursor ion: 575.31  
Mass type: mono  
Mod's: (M\* +15.99492) C=161.01468

Ion series for charge: +1

| AA | A ions        | B ions         | B* ions | Bo ions | C ions | Y ions         | Y* ions | Yo ions | Z ions |
|----|---------------|----------------|---------|---------|--------|----------------|---------|---------|--------|
| L  | 86.10         | 114.09         |         |         |        |                |         |         |        |
| V  | <b>185.16</b> | <b>213.16</b>  |         |         |        | <b>1036.53</b> |         |         |        |
| Q  | 313.22        | 341.22         |         |         |        | <b>937.46</b>  |         |         |        |
| E  | 442.27        | 470.26         |         |         |        | 809.40         |         |         |        |
| V  | 541.33        | 569.33         |         |         |        | 680.36         |         |         |        |
| T  | 642.38        | 670.38         |         |         |        | 581.29         |         |         |        |
| D  | 757.41        | <b>785.40</b>  |         |         |        | 480.25         |         |         |        |
| F  | 904.48        | 932.47         |         |         |        | <b>365.22</b>  |         |         |        |
| A  | 975.51        | <b>1003.51</b> |         |         |        | <b>218.15</b>  |         |         |        |
| K  |               |                |         |         |        | <b>147.11</b>  |         |         |        |

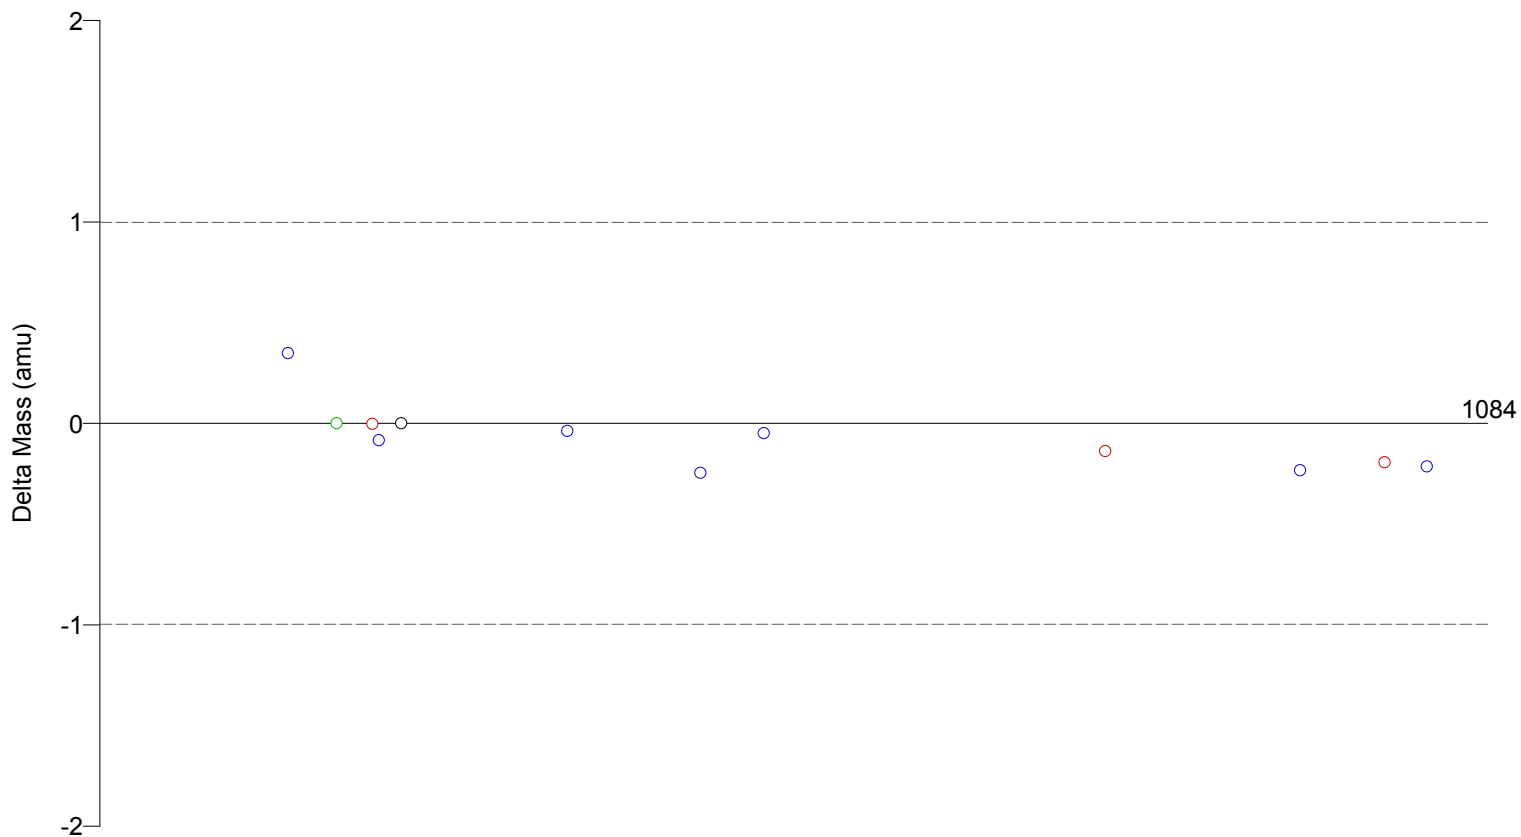

#19287468-1 NL: 3.94E6

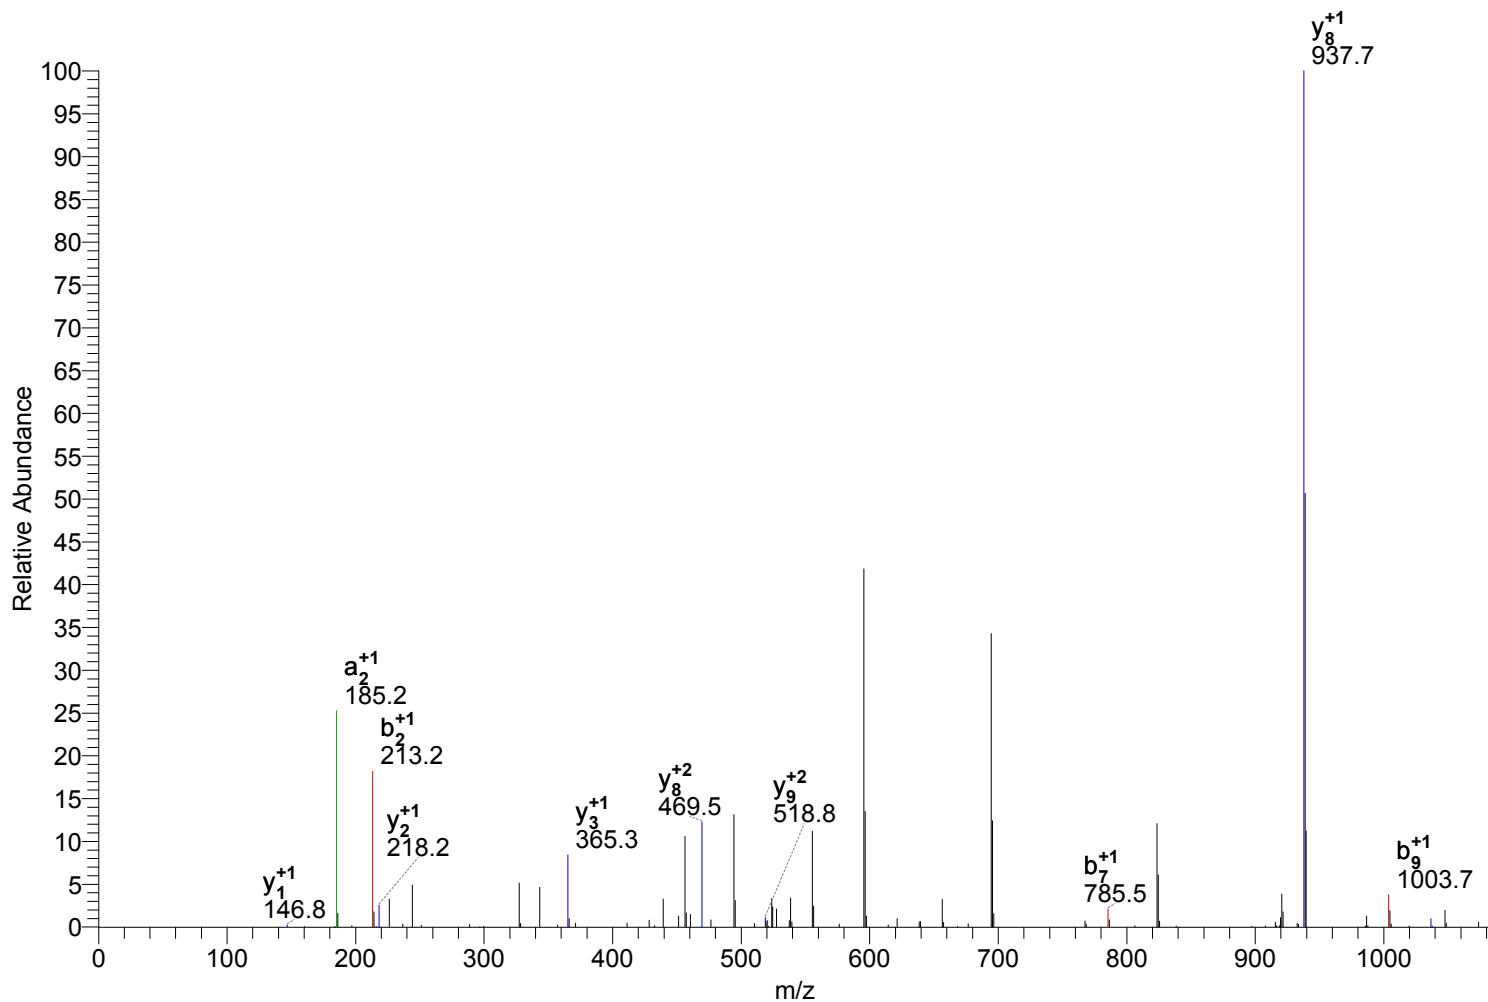

---

| Reference                                                      |          |        |   | P    | Score | Coverage | Accession |     |       |       |
|----------------------------------------------------------------|----------|--------|---|------|-------|----------|-----------|-----|-------|-------|
| Scan(s)                                                        | Sequence | MH+    | z | P    | XC    | DeltaCn  | Sp        | RSp | Ions  | Count |
| IPI:IPI00382748.2 SWISS-PROT:Q5T013-3 TREMBL:A8MSM3 ENSEMBL:EN |          |        |   | 1    | 10.1  | 0.0      | 0         |     |       |       |
| 19287468 - 1 R.IHLMAGR.V                                       |          | 797.45 | 2 | 0.07 | 2.141 | 0.000    | 350.3     | 1   | 10/18 | 6     |

1 of 1 peptide matches reported, 0 removed due to filtering

DTA for scans: 19287468-1  
Precursor ion: 399.23  
Mass type: mono  
Mod's: (M\* +15.99492) C=161.01468

Ion series for charge: +1

| AA | A ions        | B ions        | B* ions | Bo ions | C ions | Y ions        | Y* ions | Yo ions | Z ions |
|----|---------------|---------------|---------|---------|--------|---------------|---------|---------|--------|
| I  | 86.10         | 114.09        |         |         |        |               |         |         |        |
| H  | <b>223.16</b> | <b>251.15</b> |         |         |        | <b>684.36</b> |         |         |        |
| L  | 336.24        | <b>364.23</b> |         |         |        | <b>547.30</b> |         |         |        |
| M  | 467.28        | <b>495.27</b> |         |         |        | <b>434.22</b> |         |         |        |
| A  | 538.32        | <b>566.31</b> |         |         |        | <b>303.18</b> |         |         |        |
| G  | 595.34        | 623.33        |         |         |        | <b>232.14</b> |         |         |        |
| R  |               |               |         |         |        | 175.12        |         |         |        |



#19287468-1 NL: 3.32E5



---

| Reference                          |             |        |   | P    | Score | Coverage | Accession |     |       |       |
|------------------------------------|-------------|--------|---|------|-------|----------|-----------|-----|-------|-------|
| Scan(s)                            | Sequence    | MH+    | z | P    | XC    | DeltaCn  | Sp        | RSp | Ions  | Count |
| IPI:IPI00465271.2 SWISS-PROT:Q5T01 |             |        |   | 1    | 10.1  | 0.0      | 0         |     |       |       |
| 19287468 - 1                       | R.IHLMAGR.V | 797.45 | 2 | 0.07 | 2.141 | 0.000    | 350.3     | 1   | 10/18 | 6     |

1 of 1 peptide matches reported, 0 removed due to filtering

DTA for scans: 19287468-1  
Precursor ion: 399.23  
Mass type: mono  
Mod's: (M\* +15.99492) C=161.01468

Ion series for charge: +1

| AA | A ions        | B ions        | B* ions | Bo ions | C ions | Y ions        | Y* ions | Yo ions | Z ions |
|----|---------------|---------------|---------|---------|--------|---------------|---------|---------|--------|
| I  | 86.10         | 114.09        |         |         |        |               |         |         |        |
| H  | <b>223.16</b> | <b>251.15</b> |         |         |        | <b>684.36</b> |         |         |        |
| L  | 336.24        | <b>364.23</b> |         |         |        | <b>547.30</b> |         |         |        |
| M  | 467.28        | <b>495.27</b> |         |         |        | <b>434.22</b> |         |         |        |
| A  | 538.32        | <b>566.31</b> |         |         |        | <b>303.18</b> |         |         |        |
| G  | 595.34        | 623.33        |         |         |        | <b>232.14</b> |         |         |        |
| R  |               |               |         |         |        | 175.12        |         |         |        |



#19287468-1 NL: 3.32E5





---

| Reference                          |             |        |   | P    | Score | Coverage | Accession |     |       |       |
|------------------------------------|-------------|--------|---|------|-------|----------|-----------|-----|-------|-------|
| Scan(s)                            | Sequence    | MH+    | z | P    | XC    | DeltaCn  | Sp        | RSp | Ions  | Count |
| IPI:IPI00514542.1 TREMBL:Q5T017 EN |             |        |   | 1    | 10.1  | 0.0      | 0         |     |       |       |
| 19287468 - 1                       | R.IHLMAGR.V | 797.45 | 2 | 0.07 | 2.141 | 0.000    | 350.3     | 1   | 10/18 | 6     |

1 of 1 peptide matches reported, 0 removed due to filtering

DTA for scans: 19287468-1  
Precursor ion: 399.23  
Mass type: mono  
Mod's: (M\* +15.99492) C=161.01468

Ion series for charge: +1

| AA | A ions        | B ions        | B* ions | Bo ions | C ions | Y ions        | Y* ions | Yo ions | Z ions |
|----|---------------|---------------|---------|---------|--------|---------------|---------|---------|--------|
| I  | 86.10         | 114.09        |         |         |        |               |         |         |        |
| H  | <b>223.16</b> | <b>251.15</b> |         |         |        | <b>684.36</b> |         |         |        |
| L  | 336.24        | <b>364.23</b> |         |         |        | <b>547.30</b> |         |         |        |
| M  | 467.28        | <b>495.27</b> |         |         |        | <b>434.22</b> |         |         |        |
| A  | 538.32        | <b>566.31</b> |         |         |        | <b>303.18</b> |         |         |        |
| G  | 595.34        | 623.33        |         |         |        | <b>232.14</b> |         |         |        |
| R  |               |               |         |         |        | 175.12        |         |         |        |



#19287468-1 NL: 3.32E5



---

| Reference                          |             |        |   | P    | Score | Coverage | Accession |     |       |       |
|------------------------------------|-------------|--------|---|------|-------|----------|-----------|-----|-------|-------|
| Scan(s)                            | Sequence    | MH+    | z | P    | XC    | DeltaCn  | Sp        | RSp | Ions  | Count |
| IPI:IPI00647220.1 TREMBL:Q5T014 EN |             |        |   | 1    | 10.1  | 0.0      | 0         |     |       |       |
| 19287468 - 1                       | R.IHLMAGR.V | 797.45 | 2 | 0.07 | 2.141 | 0.000    | 350.3     | 1   | 10/18 | 6     |

1 of 1 peptide matches reported, 0 removed due to filtering

DTA for scans: 19287468-1  
Precursor ion: 399.23  
Mass type: mono  
Mod's: (M\* +15.99492) C=161.01468

Ion series for charge: +1

| AA | A ions        | B ions        | B* ions | Bo ions | C ions | Y ions        | Y* ions | Yo ions | Z ions |
|----|---------------|---------------|---------|---------|--------|---------------|---------|---------|--------|
| I  | 86.10         | 114.09        |         |         |        |               |         |         |        |
| H  | <b>223.16</b> | <b>251.15</b> |         |         |        | <b>684.36</b> |         |         |        |
| L  | 336.24        | <b>364.23</b> |         |         |        | <b>547.30</b> |         |         |        |
| M  | 467.28        | <b>495.27</b> |         |         |        | <b>434.22</b> |         |         |        |
| A  | 538.32        | <b>566.31</b> |         |         |        | <b>303.18</b> |         |         |        |
| G  | 595.34        | 623.33        |         |         |        | <b>232.14</b> |         |         |        |
| R  |               |               |         |         |        | 175.12        |         |         |        |



#19287468-1 NL: 3.32E5



---

| Reference                          |             |        |   | P    | Score | Coverage | Accession |     |       |       |
|------------------------------------|-------------|--------|---|------|-------|----------|-----------|-----|-------|-------|
| Scan(s)                            | Sequence    | MH+    | z | P    | XC    | DeltaCn  | Sp        | RSp | Ions  | Count |
| IPI:IPI00743712.1 ENSEMBL:ENSP0000 |             |        |   | 1    | 10.1  | 0.0      | 0         |     |       |       |
| 19287468 - 1                       | R.IHLMAGR.V | 797.45 | 2 | 0.07 | 2.141 | 0.000    | 350.3     | 1   | 10/18 | 6     |

1 of 1 peptide matches reported, 0 removed due to filtering

DTA for scans: 19287468-1  
Precursor ion: 399.23  
Mass type: mono  
Mod's: (M\* +15.99492) C=161.01468

Ion series for charge: +1

| AA | A ions        | B ions        | B* ions | Bo ions | C ions | Y ions        | Y* ions | Yo ions | Z ions |
|----|---------------|---------------|---------|---------|--------|---------------|---------|---------|--------|
| I  | 86.10         | 114.09        |         |         |        |               |         |         |        |
| H  | <b>223.16</b> | <b>251.15</b> |         |         |        | <b>684.36</b> |         |         |        |
| L  | 336.24        | <b>364.23</b> |         |         |        | <b>547.30</b> |         |         |        |
| M  | 467.28        | <b>495.27</b> |         |         |        | <b>434.22</b> |         |         |        |
| A  | 538.32        | <b>566.31</b> |         |         |        | <b>303.18</b> |         |         |        |
| G  | 595.34        | 623.33        |         |         |        | <b>232.14</b> |         |         |        |
| R  |               |               |         |         |        | 175.12        |         |         |        |



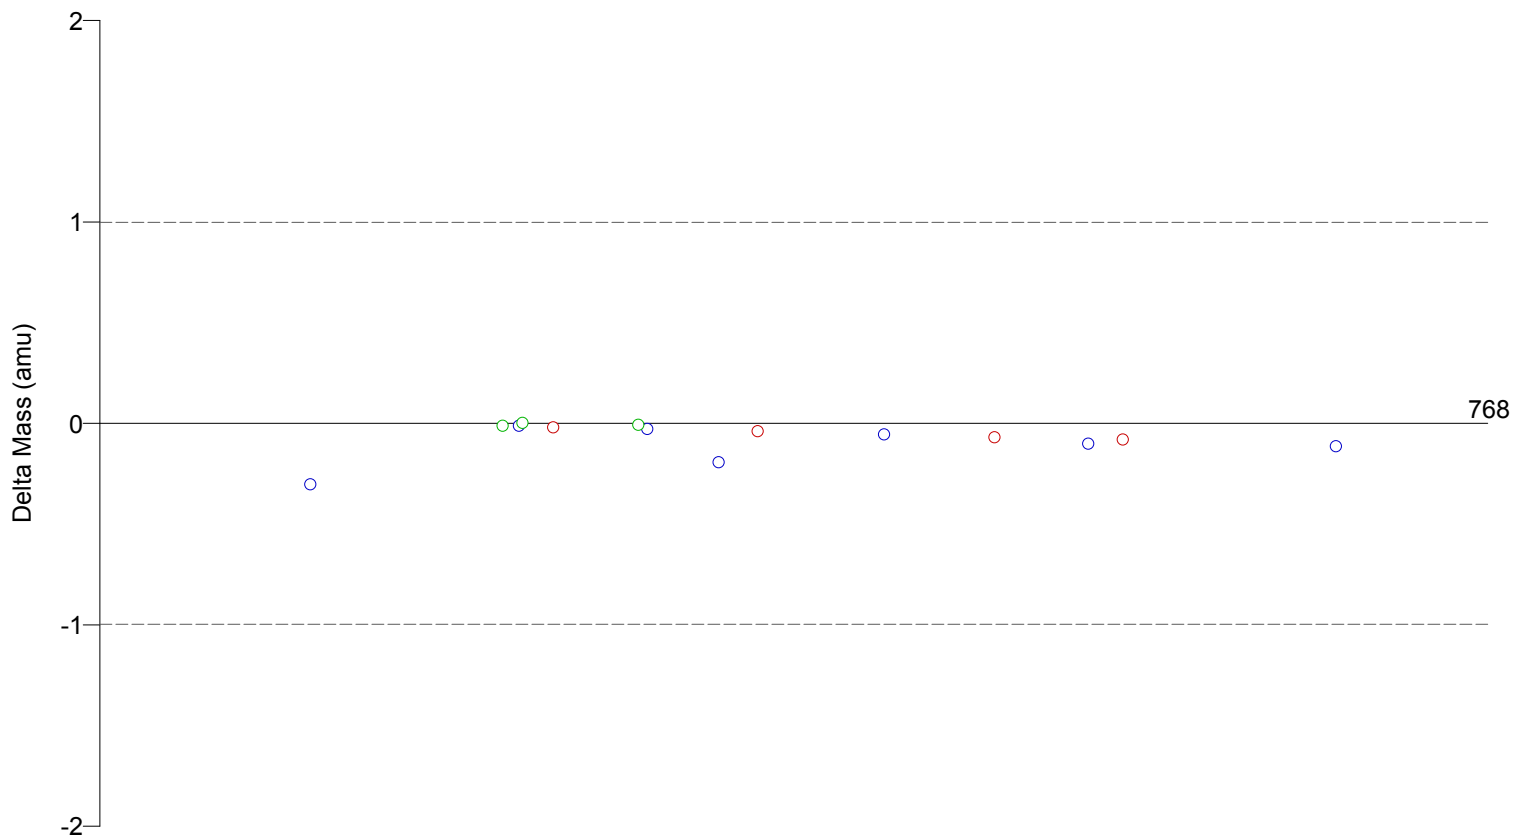

#19287468-1 NL: 3.32E5



---

| Reference                          |             |        |   | P    | Score | Coverage | Accession |     |       |       |
|------------------------------------|-------------|--------|---|------|-------|----------|-----------|-----|-------|-------|
| Scan(s)                            | Sequence    | MH+    | z | P    | XC    | DeltaCn  | Sp        | RSp | Ions  | Count |
| IPI:IPI00847938.1 SWISS-PROT:Q5T01 |             |        |   | 1    | 10.1  | 0.0      | 0         |     |       |       |
| 19287468 - 1                       | R.IHLMAGR.V | 797.45 | 2 | 0.07 | 2.141 | 0.000    | 350.3     | 1   | 10/18 | 6     |

1 of 1 peptide matches reported, 0 removed due to filtering

DTA for scans: 19287468-1  
Precursor ion: 399.23  
Mass type: mono  
Mod's: (M\* +15.99492) C=161.01468

Ion series for charge: +1

| AA | A ions        | B ions        | B* ions | Bo ions | C ions | Y ions        | Y* ions | Yo ions | Z ions |
|----|---------------|---------------|---------|---------|--------|---------------|---------|---------|--------|
| I  | 86.10         | 114.09        |         |         |        |               |         |         |        |
| H  | <b>223.16</b> | <b>251.15</b> |         |         |        | <b>684.36</b> |         |         |        |
| L  | 336.24        | <b>364.23</b> |         |         |        | <b>547.30</b> |         |         |        |
| M  | 467.28        | <b>495.27</b> |         |         |        | <b>434.22</b> |         |         |        |
| A  | 538.32        | <b>566.31</b> |         |         |        | <b>303.18</b> |         |         |        |
| G  | 595.34        | 623.33        |         |         |        | <b>232.14</b> |         |         |        |
| R  |               |               |         |         |        | 175.12        |         |         |        |



#19287468-1 NL: 3.32E5



---

| Reference                          |             |        |   | P    | Score | Coverage | Accession |     |       |       |
|------------------------------------|-------------|--------|---|------|-------|----------|-----------|-----|-------|-------|
| Scan(s)                            | Sequence    | MH+    | z | P    | XC    | DeltaCn  | Sp        | RSp | Ions  | Count |
| IPI:IPI00848045.1 SWISS-PROT:Q5T01 |             |        |   | 1    | 10.1  | 0.0      | 0         |     |       |       |
| 19287468 - 1                       | R.IHLMAGR.V | 797.45 | 2 | 0.07 | 2.141 | 0.000    | 350.3     | 1   | 10/18 | 6     |

1 of 1 peptide matches reported, 0 removed due to filtering

DTA for scans: 19287468-1  
Precursor ion: 399.23  
Mass type: mono  
Mod's: (M\* +15.99492) C=161.01468

Ion series for charge: +1

| AA | A ions        | B ions        | B* ions | Bo ions | C ions | Y ions        | Y* ions | Yo ions | Z ions |
|----|---------------|---------------|---------|---------|--------|---------------|---------|---------|--------|
| I  | 86.10         | 114.09        |         |         |        |               |         |         |        |
| H  | <b>223.16</b> | <b>251.15</b> |         |         |        | <b>684.36</b> |         |         |        |
| L  | 336.24        | <b>364.23</b> |         |         |        | <b>547.30</b> |         |         |        |
| M  | 467.28        | <b>495.27</b> |         |         |        | <b>434.22</b> |         |         |        |
| A  | 538.32        | <b>566.31</b> |         |         |        | <b>303.18</b> |         |         |        |
| G  | 595.34        | 623.33        |         |         |        | <b>232.14</b> |         |         |        |
| R  |               |               |         |         |        | 175.12        |         |         |        |



#19287468-1 NL: 3.32E5



---

| Reference                                                      |          |         |   | P | Score | Coverage | Accession |     |       |       |
|----------------------------------------------------------------|----------|---------|---|---|-------|----------|-----------|-----|-------|-------|
| Scan(s)                                                        | Sequence | MH+     | z | P | XC    | DeltaCn  | Sp        | RSp | Ions  | Count |
| IPI:IPI00655605.1 TREMBL:Q3C2D8 ENSEMBL:ENSP00000356952 REFSEQ |          |         |   | 1 | 8.1   | 0.0      | 0         |     |       |       |
| 19287468 - 1 R.GTGIALSADVGPR.K                                 |          | 1213.65 | 2 | 1 | 2.499 | 0.397    | 295.1     | 4   | 13/36 | 1     |

1 of 1 peptide matches reported, 0 removed due to filtering



DTA for scans: 19287468-1  
Precursor ion: 607.32  
Mass type: mono  
Mod's: (M\* +15.99492) C=161.01468

Ion series for charge: +1

| AA | A ions        | B ions        | B* ions | Bo ions | C ions | Y ions        | Y* ions | Yo ions | Z ions |
|----|---------------|---------------|---------|---------|--------|---------------|---------|---------|--------|
| G  | 30.03         | 58.03         |         |         |        |               |         |         |        |
| T  | 131.08        | 159.08        |         |         |        | 1156.63       |         |         |        |
| G  | 188.10        | 216.10        |         |         |        | 1055.58       |         |         |        |
| I  | <b>301.19</b> | 329.18        |         |         |        | 998.56        |         |         |        |
| A  | 372.22        | 400.22        |         |         |        | 885.48        |         |         |        |
| L  | <b>485.31</b> | <b>513.30</b> |         |         |        | <b>814.44</b> |         |         |        |
| S  | <b>572.34</b> | 600.34        |         |         |        | 701.36        |         |         |        |
| A  | <b>643.38</b> | 671.37        |         |         |        | 614.33        |         |         |        |
| D  | 758.40        | <b>786.40</b> |         |         |        | <b>543.29</b> |         |         |        |
| V  | 857.47        | 885.47        |         |         |        | <b>428.26</b> |         |         |        |
| G  | <b>914.49</b> | <b>942.49</b> |         |         |        | 329.19        |         |         |        |
| P  | 1011.55       | 1039.54       |         |         |        | <b>272.17</b> |         |         |        |
| R  |               |               |         |         |        | <b>175.12</b> |         |         |        |

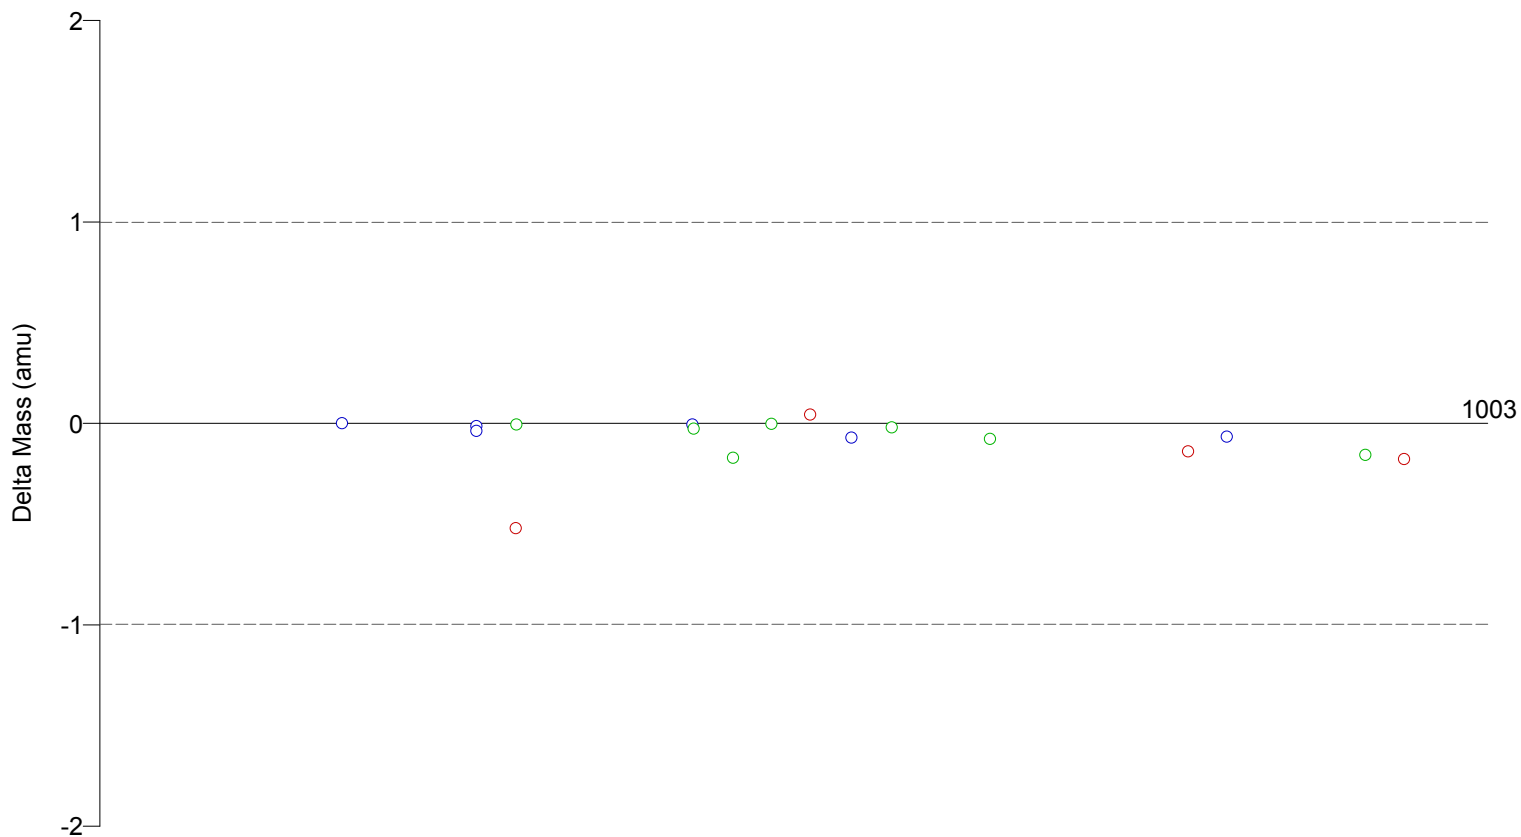

#19287468-1 NL: 1.26E5

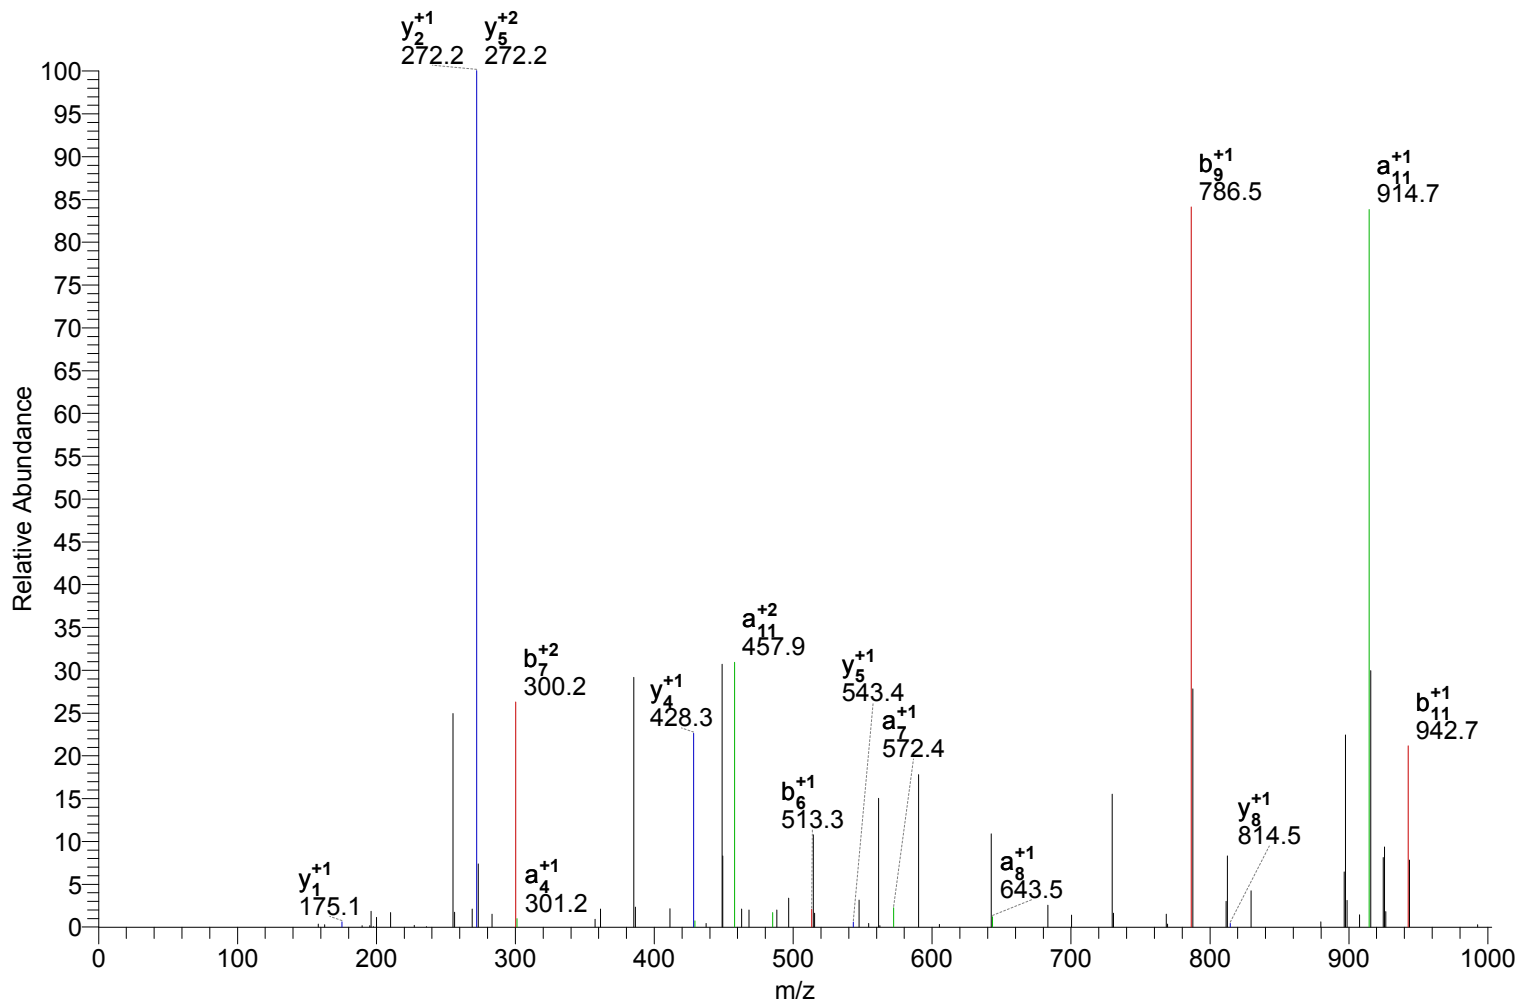

---

| Reference                          |                   |         |   | P | Score | Coverage | Accession |     |       |       |
|------------------------------------|-------------------|---------|---|---|-------|----------|-----------|-----|-------|-------|
| Scan(s)                            | Sequence          | MH+     | z | P | XC    | DeltaCn  | Sp        | RSp | Ions  | Count |
| IPI:IPI00655889.1 TREMBL:Q3C259 RE |                   |         |   | 1 | 8.1   | 0.0      | 0         |     |       |       |
| 19287468 - 1                       | R.GTGIALSADVGPR.K | 1213.65 | 2 | 1 | 2.499 | 0.397    | 295.1     | 4   | 13/36 | 1     |

1 of 1 peptide matches reported, 0 removed due to filtering

DTA for scans: 19287468-1  
Precursor ion: 607.32  
Mass type: mono  
Mod's: (M\* +15.99492) C=161.01468

Ion series for charge: +1

| AA | A ions        | B ions        | B* ions | Bo ions | C ions | Y ions        | Y* ions | Yo ions | Z ions |
|----|---------------|---------------|---------|---------|--------|---------------|---------|---------|--------|
| G  | 30.03         | 58.03         |         |         |        |               |         |         |        |
| T  | 131.08        | 159.08        |         |         |        | 1156.63       |         |         |        |
| G  | 188.10        | 216.10        |         |         |        | 1055.58       |         |         |        |
| I  | <b>301.19</b> | 329.18        |         |         |        | 998.56        |         |         |        |
| A  | 372.22        | 400.22        |         |         |        | 885.48        |         |         |        |
| L  | <b>485.31</b> | <b>513.30</b> |         |         |        | <b>814.44</b> |         |         |        |
| S  | <b>572.34</b> | 600.34        |         |         |        | 701.36        |         |         |        |
| A  | <b>643.38</b> | 671.37        |         |         |        | 614.33        |         |         |        |
| D  | 758.40        | <b>786.40</b> |         |         |        | <b>543.29</b> |         |         |        |
| V  | 857.47        | 885.47        |         |         |        | <b>428.26</b> |         |         |        |
| G  | <b>914.49</b> | <b>942.49</b> |         |         |        | 329.19        |         |         |        |
| P  | 1011.55       | 1039.54       |         |         |        | <b>272.17</b> |         |         |        |
| R  |               |               |         |         |        | <b>175.12</b> |         |         |        |



#19287468-1 NL: 1.26E5



---

| Reference                                                      |          |         |   | P | Score | Coverage | Accession |     |       |       |
|----------------------------------------------------------------|----------|---------|---|---|-------|----------|-----------|-----|-------|-------|
| Scan(s)                                                        | Sequence | MH+     | z | P | XC    | DeltaCn  | Sp        | RSp | Ions  | Count |
| IPI:IPI00740527.3 SWISS-PROT:A8MUQ0 REFSEQ:XP_001717830 Tax_Id |          |         |   | 1 | 8.1   | 0.0      | 0         |     |       |       |
| 19287468 - 1 R.NQDTRM*TSRLK.F                                  |          | 1365.69 | 2 | 1 | 1.969 | 0.491    | 279.0     | 2   | 12/30 | 1     |

1 of 1 peptide matches reported, 0 removed due to filtering

DTA for scans: 19287468-1  
Precursor ion: 683.35  
Mass type: mono  
Mod's: (M\* +15.99492) C=161.01468

Ion series for charge: +1

| AA | A ions         | B ions        | B* ions | Bo ions | C ions | Y ions         | Y* ions | Yo ions | Z ions |
|----|----------------|---------------|---------|---------|--------|----------------|---------|---------|--------|
| N  | 87.06          | 115.05        |         |         |        |                |         |         |        |
| Q  | <b>215.11</b>  | <b>243.11</b> |         |         |        | 1251.65        |         |         |        |
| D  | 330.14         | 358.14        |         |         |        | <b>1123.59</b> |         |         |        |
| T  | 431.19         | 459.18        |         |         |        | <b>1008.56</b> |         |         |        |
| R  | <b>587.29</b>  | 615.28        |         |         |        | 907.51         |         |         |        |
| M* | 734.33         | <b>762.32</b> |         |         |        | 751.41         |         |         |        |
| T  | 835.37         | <b>863.37</b> |         |         |        | 604.38         |         |         |        |
| S  | 922.40         | 950.40        |         |         |        | <b>503.33</b>  |         |         |        |
| R  | <b>1078.51</b> | 1106.50       |         |         |        | 416.30         |         |         |        |
| L  | <b>1191.59</b> | 1219.58       |         |         |        | 260.20         |         |         |        |
| K  |                |               |         |         |        | 147.11         |         |         |        |

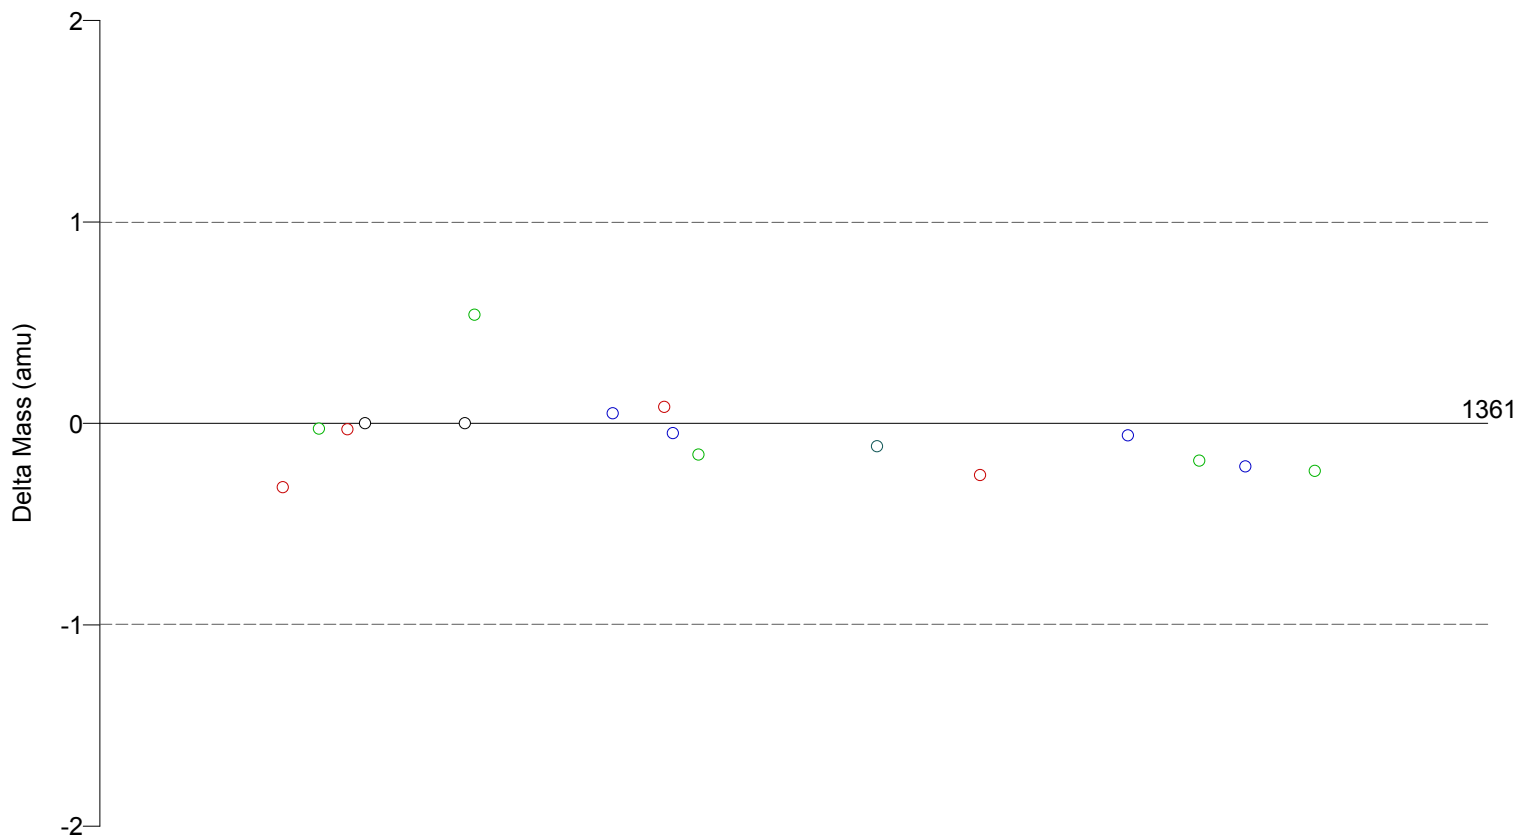

#19287468-1 NL: 1.28E5

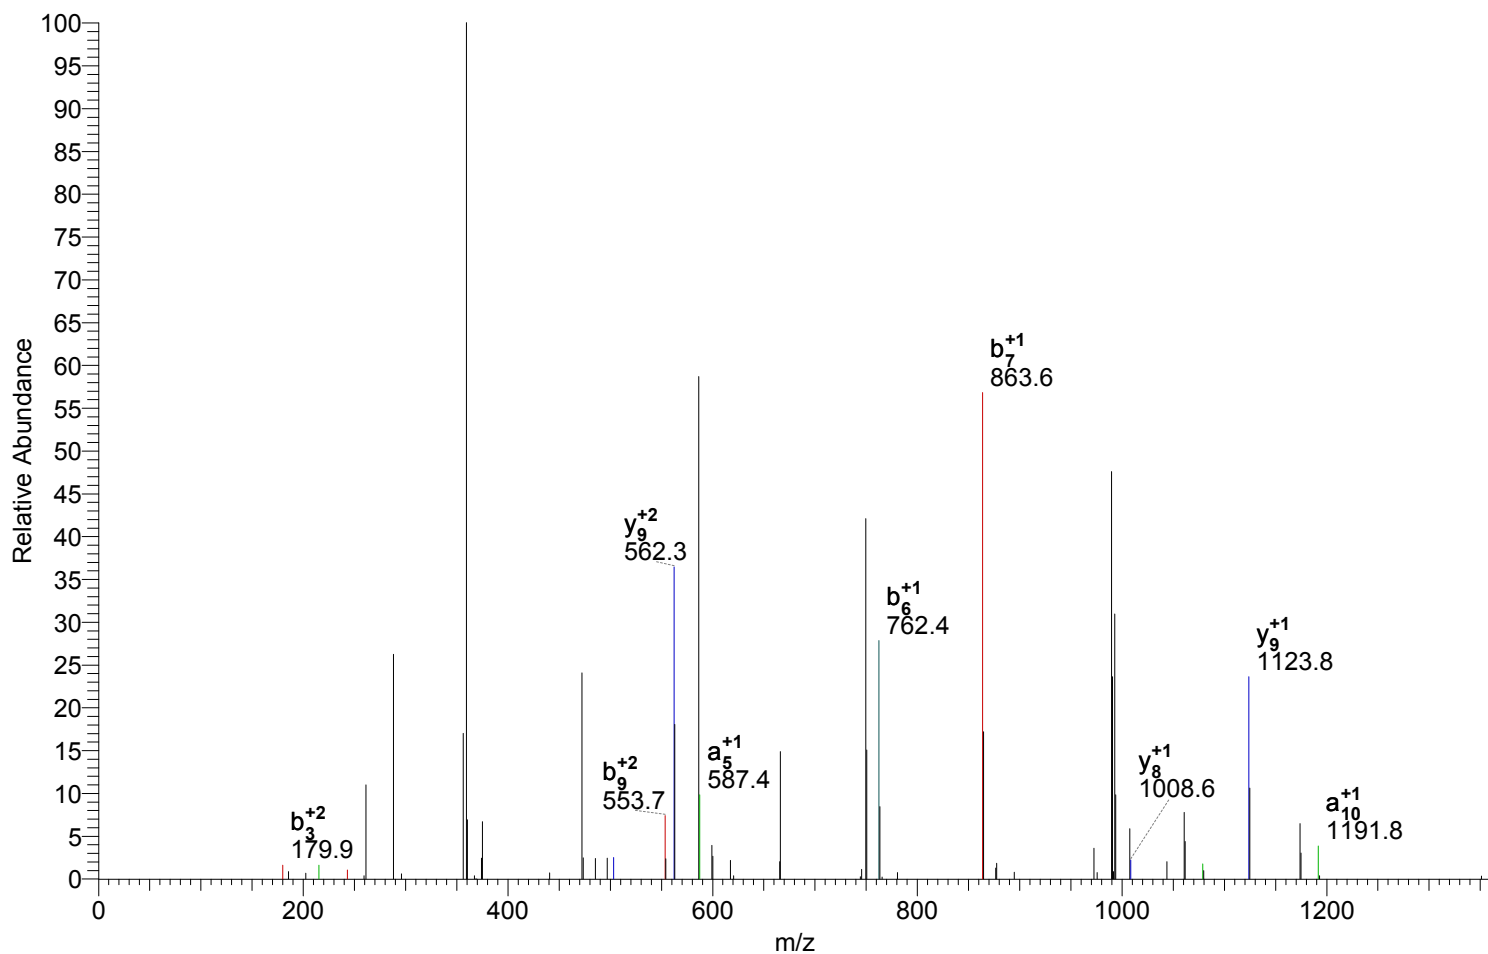



---

| Reference                          |                  |         |   | P | Score | Coverage | Accession |     |       |       |
|------------------------------------|------------------|---------|---|---|-------|----------|-----------|-----|-------|-------|
| Scan(s)                            | Sequence         | MH+     | z | P | XC    | DeltaCn  | Sp        | RSp | Ions  | Count |
| IPI:IPI00888926.1 REFSEQ:XP_943402 |                  |         |   | 1 | 8.1   | 0.0      | 0         |     |       |       |
| 19287468 - 1                       | R.NQDTRM*TSRLK.F | 1365.69 | 2 | 1 | 1.969 | 0.491    | 279.0     | 2   | 12/30 | 1     |

1 of 1 peptide matches reported, 0 removed due to filtering

DTA for scans: 19287468-1  
Precursor ion: 683.35  
Mass type: mono  
Mod's: (M\* +15.99492) C=161.01468

Ion series for charge: +1

| AA | A ions         | B ions        | B* ions | Bo ions | C ions | Y ions         | Y* ions | Yo ions | Z ions |
|----|----------------|---------------|---------|---------|--------|----------------|---------|---------|--------|
| N  | 87.06          | 115.05        |         |         |        |                |         |         |        |
| Q  | <b>215.11</b>  | <b>243.11</b> |         |         |        | 1251.65        |         |         |        |
| D  | 330.14         | 358.14        |         |         |        | <b>1123.59</b> |         |         |        |
| T  | 431.19         | 459.18        |         |         |        | <b>1008.56</b> |         |         |        |
| R  | <b>587.29</b>  | 615.28        |         |         |        | 907.51         |         |         |        |
| M* | 734.33         | <b>762.32</b> |         |         |        | 751.41         |         |         |        |
| T  | 835.37         | <b>863.37</b> |         |         |        | 604.38         |         |         |        |
| S  | 922.40         | 950.40        |         |         |        | <b>503.33</b>  |         |         |        |
| R  | <b>1078.51</b> | 1106.50       |         |         |        | 416.30         |         |         |        |
| L  | <b>1191.59</b> | 1219.58       |         |         |        | 260.20         |         |         |        |
| K  |                |               |         |         |        | 147.11         |         |         |        |



#19287468-1 NL: 1.28E5



---

| Reference                                                     |                     |         |   | P | Score | Coverage | Accession |     |       |       |
|---------------------------------------------------------------|---------------------|---------|---|---|-------|----------|-----------|-----|-------|-------|
| Scan(s)                                                       | Sequence            | MH+     | z | P | XC    | DeltaCn  | Sp        | RSp | Ions  | Count |
| IPI:IPI00103871.3 SWISS-PROT:Q8WZ75-1 ENSEMBL:ENSP00000304945 |                     |         |   | 1 | 8.1   | 0.0      | 0         |     |       |       |
| 19287468 - 1                                                  | R.ARGPDSNVLLRLPEK.V | 1778.03 | 3 | 1 | 1.316 | 0.491    | 55.0      | 6   | 14/90 | 3     |

1 of 1 peptide matches reported, 0 removed due to filtering

DTA for scans: 19287468-1  
Precursor ion: 593.33  
Mass type: mono  
Mod's: (M\* +15.99492) C=161.01468

Ion series for charge: +1

| AA | A ions        | B ions        | B* ions | Bo ions | C ions | Y ions        | Y* ions | Yo ions | Z ions |
|----|---------------|---------------|---------|---------|--------|---------------|---------|---------|--------|
| A  | 44.05         | 72.04         |         |         |        |               |         |         |        |
| R  | <b>200.15</b> | <b>228.15</b> |         |         |        | 1706.99       |         |         |        |
| G  | 257.17        | <b>285.17</b> |         |         |        | 1550.89       |         |         |        |
| P  | <b>354.22</b> | 382.22        |         |         |        | 1493.87       |         |         |        |
| D  | <b>469.25</b> | <b>497.25</b> |         |         |        | 1396.82       |         |         |        |
| S  | <b>556.28</b> | 584.28        |         |         |        | 1281.79       |         |         |        |
| N  | 670.33        | 698.32        |         |         |        | 1194.76       |         |         |        |
| V  | 769.40        | 797.39        |         |         |        | 1080.71       |         |         |        |
| L  | 882.48        | 910.47        |         |         |        | 981.65        |         |         |        |
| L  | 995.56        | 1023.56       |         |         |        | 868.56        |         |         |        |
| L  | 1108.65       | 1136.64       |         |         |        | 755.48        |         |         |        |
| R  | 1264.75       | 1292.74       |         |         |        | <b>642.39</b> |         |         |        |
| L  | 1377.83       | 1405.83       |         |         |        | 486.29        |         |         |        |
| P  | 1474.89       | 1502.88       |         |         |        | 373.21        |         |         |        |
| E  | 1603.93       | 1631.92       |         |         |        | 276.16        |         |         |        |
| K  |               |               |         |         |        | 147.11        |         |         |        |

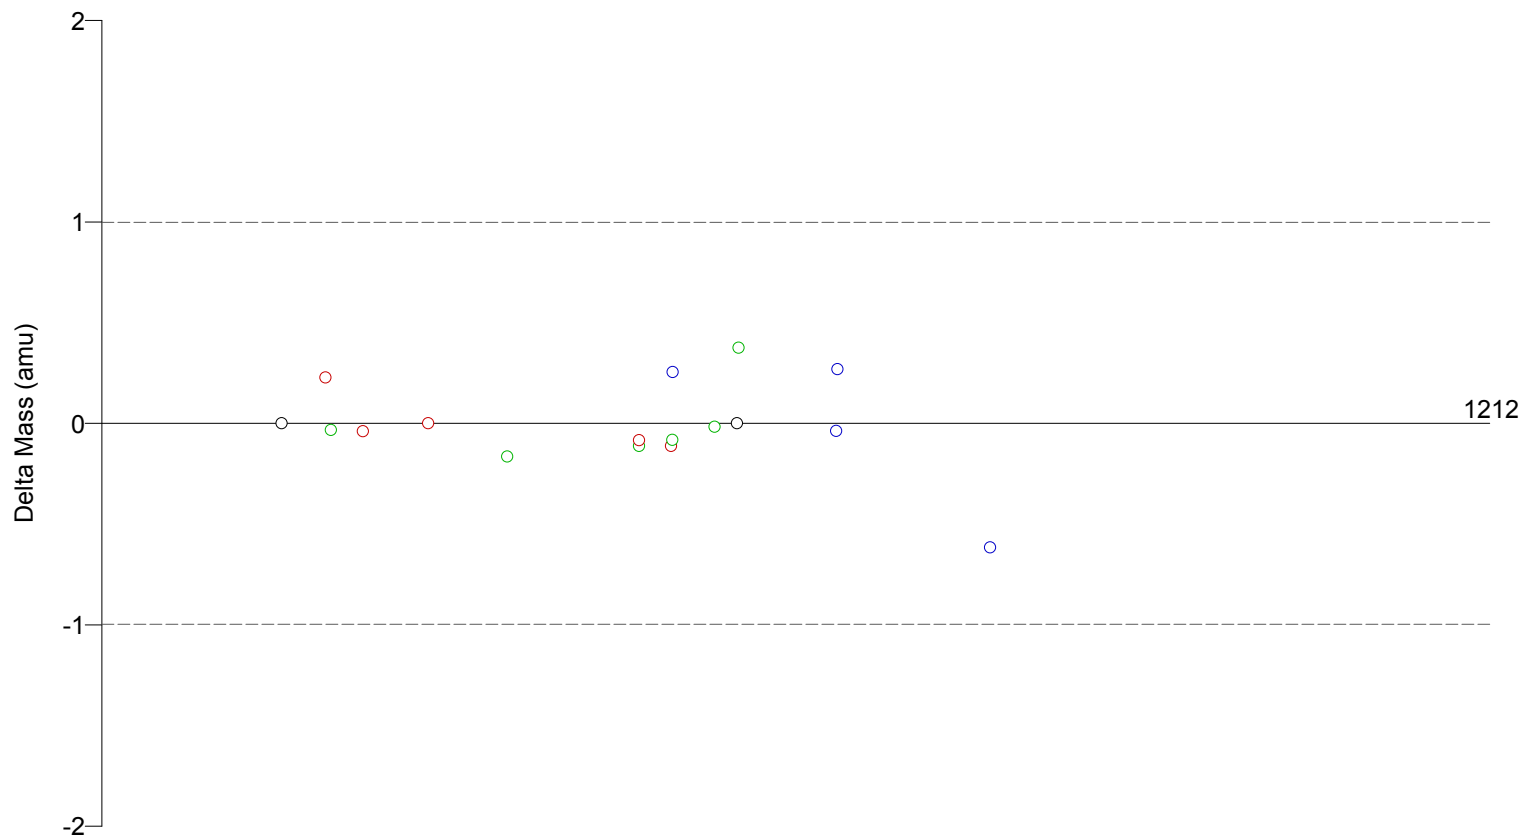

#19287468-1 NL: 6.49E5

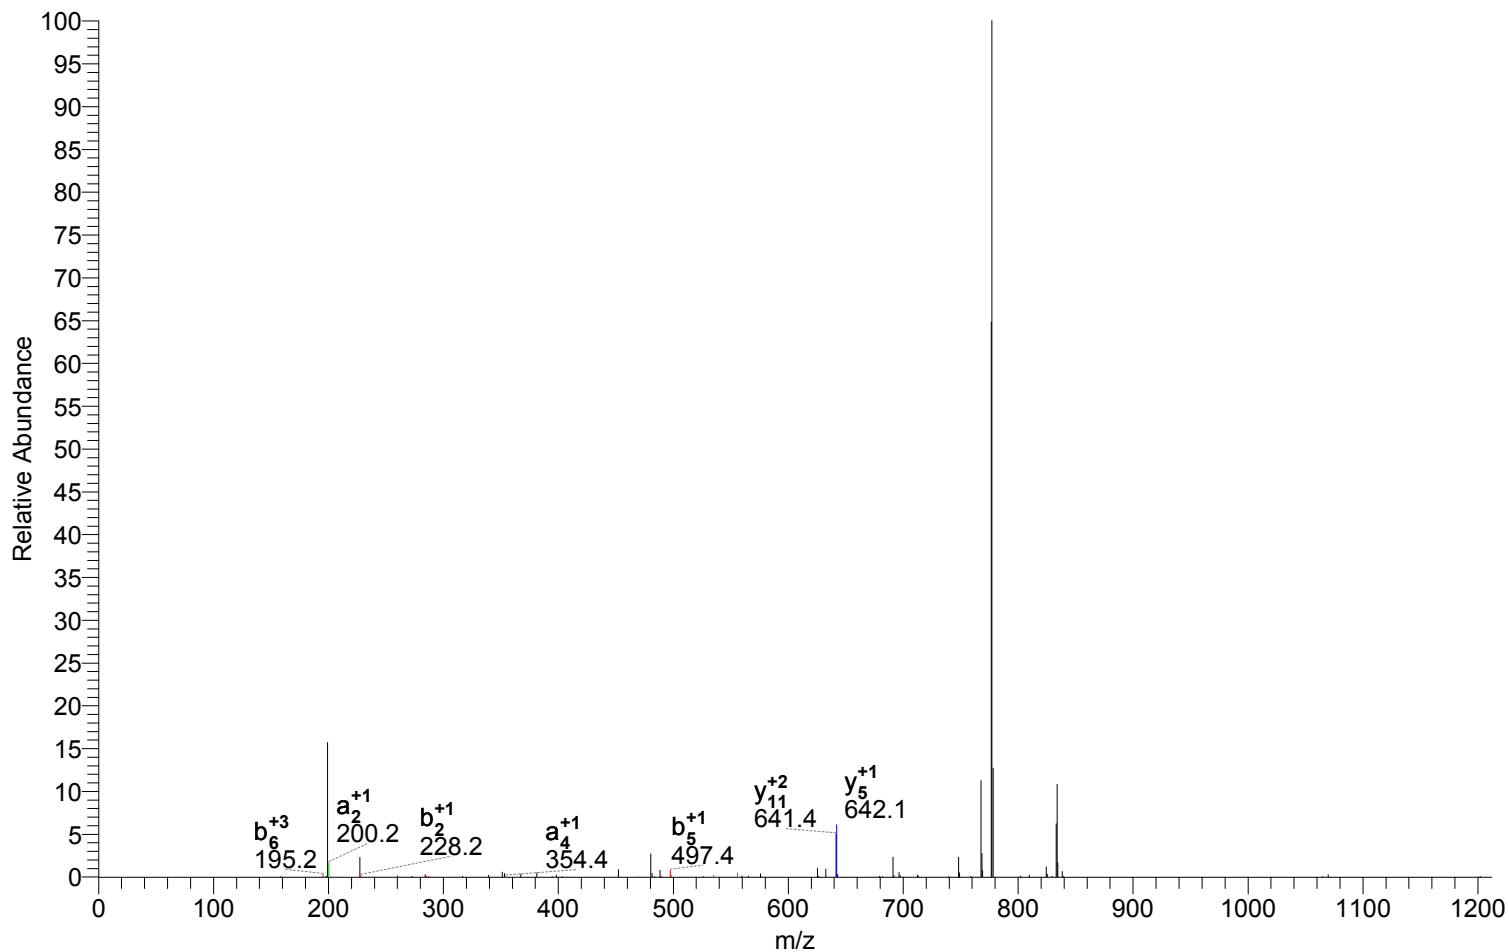

---

| Reference                          |                     |         |   | P | Score | Coverage | Accession |     |       |       |
|------------------------------------|---------------------|---------|---|---|-------|----------|-----------|-----|-------|-------|
| Scan(s)                            | Sequence            | MH+     | z | P | XC    | DeltaCn  | Sp        | RSp | Ions  | Count |
| IPI:IPI00179778.1 TREMBL:B4DNB7;B5 |                     |         |   | 1 | 8.1   | 0.0      | 0         |     |       |       |
| 19287468 - 1                       | R.ARGPDSNVLLLRPEK.V | 1778.03 | 3 | 1 | 1.316 | 0.491    | 55.0      | 6   | 14/90 | 3     |

1 of 1 peptide matches reported, 0 removed due to filtering

DTA for scans: 19287468-1  
Precursor ion: 593.33  
Mass type: mono  
Mod's: (M\* +15.99492) C=161.01468

Ion series for charge: +1

| AA | A ions        | B ions        | B* ions | Bo ions | C ions | Y ions        | Y* ions | Yo ions | Z ions |
|----|---------------|---------------|---------|---------|--------|---------------|---------|---------|--------|
| A  | 44.05         | 72.04         |         |         |        |               |         |         |        |
| R  | <b>200.15</b> | <b>228.15</b> |         |         |        | 1706.99       |         |         |        |
| G  | 257.17        | <b>285.17</b> |         |         |        | 1550.89       |         |         |        |
| P  | <b>354.22</b> | 382.22        |         |         |        | 1493.87       |         |         |        |
| D  | <b>469.25</b> | <b>497.25</b> |         |         |        | 1396.82       |         |         |        |
| S  | <b>556.28</b> | 584.28        |         |         |        | 1281.79       |         |         |        |
| N  | 670.33        | 698.32        |         |         |        | 1194.76       |         |         |        |
| V  | 769.40        | 797.39        |         |         |        | 1080.71       |         |         |        |
| L  | 882.48        | 910.47        |         |         |        | 981.65        |         |         |        |
| L  | 995.56        | 1023.56       |         |         |        | 868.56        |         |         |        |
| L  | 1108.65       | 1136.64       |         |         |        | 755.48        |         |         |        |
| R  | 1264.75       | 1292.74       |         |         |        | <b>642.39</b> |         |         |        |
| L  | 1377.83       | 1405.83       |         |         |        | 486.29        |         |         |        |
| P  | 1474.89       | 1502.88       |         |         |        | 373.21        |         |         |        |
| E  | 1603.93       | 1631.92       |         |         |        | 276.16        |         |         |        |
| K  |               |               |         |         |        | 147.11        |         |         |        |



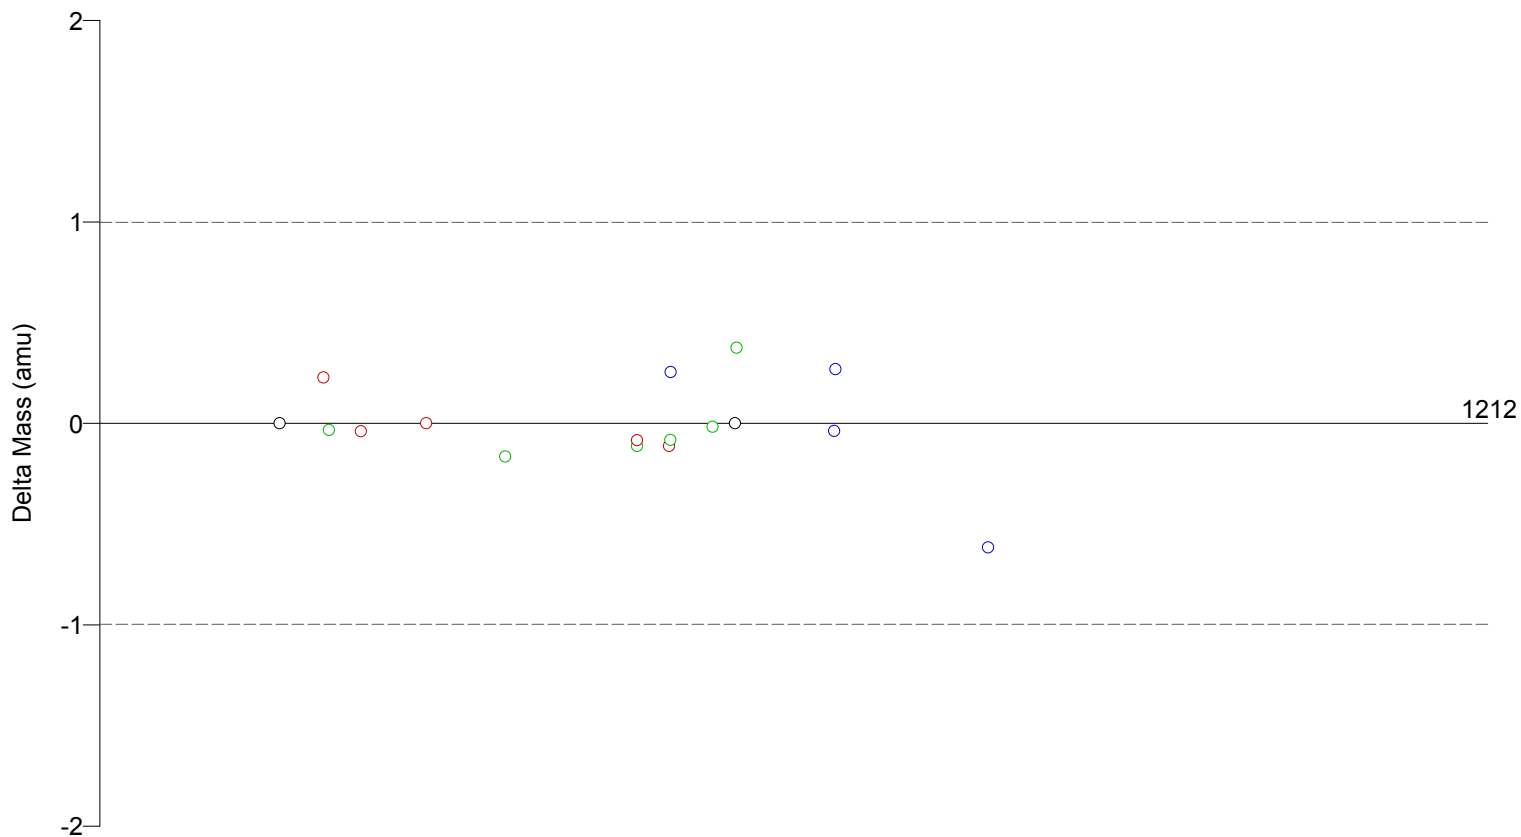

#19287468-1 NL: 6.49E5

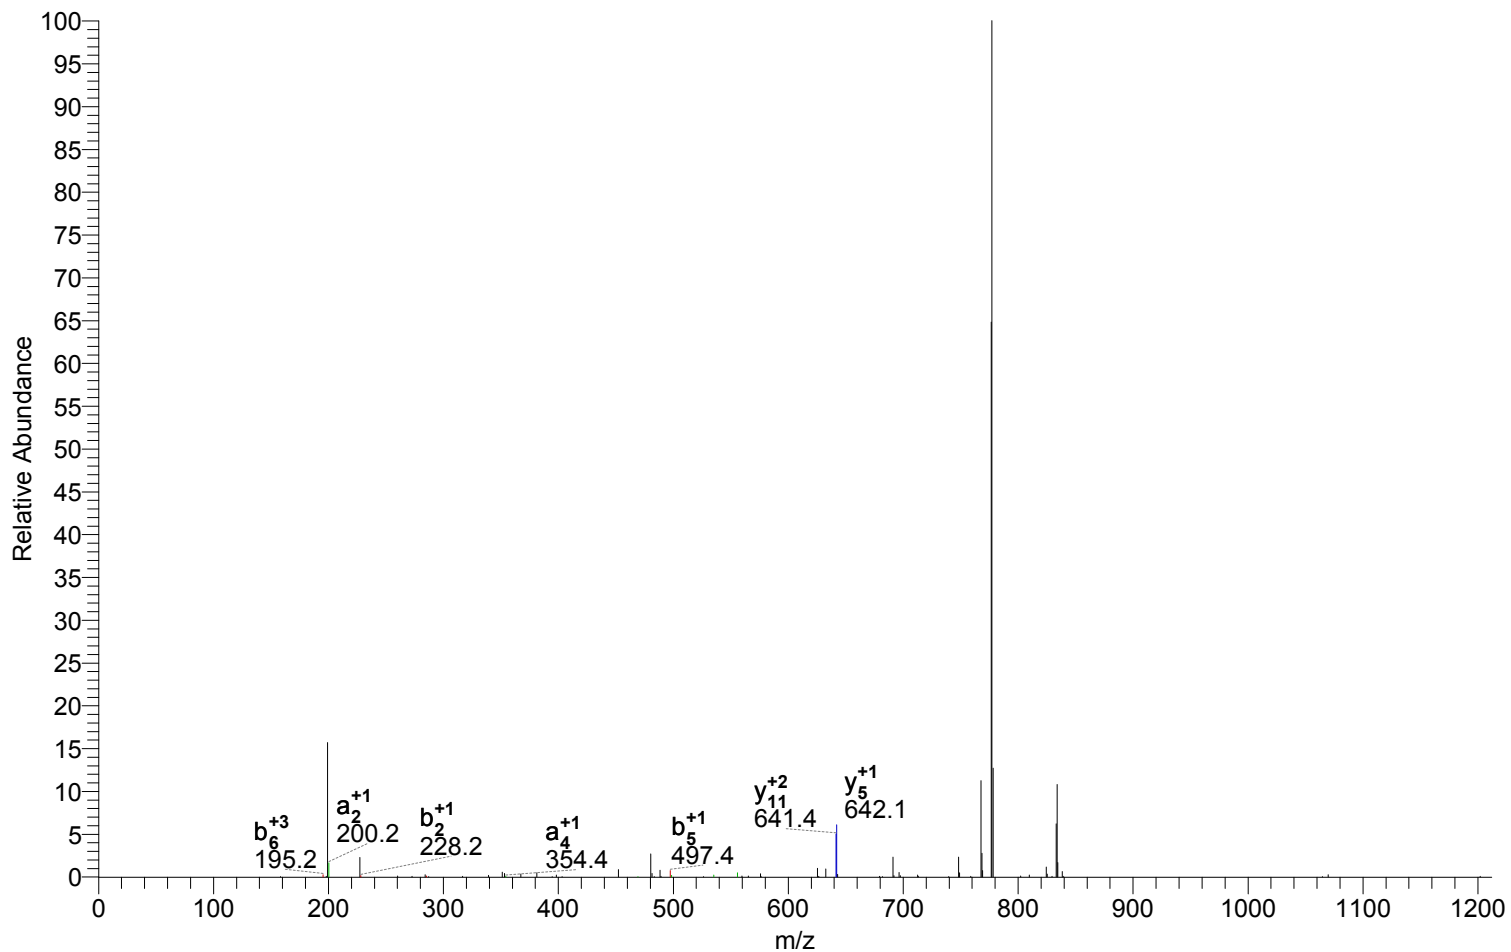

---

| Reference                          |                     |         |   | P | Score | Coverage | Accession |     |       |       |
|------------------------------------|---------------------|---------|---|---|-------|----------|-----------|-----|-------|-------|
| Scan(s)                            | Sequence            | MH+     | z | P | XC    | DeltaCn  | Sp        | RSp | Ions  | Count |
| IPI:IPI00418144.1 SWISS-PROT:Q8WZ7 |                     |         |   | 1 | 8.1   | 0.0      | 0         |     |       |       |
| 19287468 - 1                       | R.ARGPDSNVLLRLPEK.V | 1778.03 | 3 | 1 | 1.316 | 0.491    | 55.0      | 6   | 14/90 | 3     |

1 of 1 peptide matches reported, 0 removed due to filtering

DTA for scans: 19287468-1  
Precursor ion: 593.33  
Mass type: mono  
Mod's: (M\* +15.99492) C=161.01468

Ion series for charge: +1

| AA | A ions        | B ions        | B* ions | Bo ions | C ions | Y ions        | Y* ions | Yo ions | Z ions |
|----|---------------|---------------|---------|---------|--------|---------------|---------|---------|--------|
| A  | 44.05         | 72.04         |         |         |        |               |         |         |        |
| R  | <b>200.15</b> | <b>228.15</b> |         |         |        | 1706.99       |         |         |        |
| G  | 257.17        | <b>285.17</b> |         |         |        | 1550.89       |         |         |        |
| P  | <b>354.22</b> | 382.22        |         |         |        | 1493.87       |         |         |        |
| D  | <b>469.25</b> | <b>497.25</b> |         |         |        | 1396.82       |         |         |        |
| S  | <b>556.28</b> | 584.28        |         |         |        | 1281.79       |         |         |        |
| N  | 670.33        | 698.32        |         |         |        | 1194.76       |         |         |        |
| V  | 769.40        | 797.39        |         |         |        | 1080.71       |         |         |        |
| L  | 882.48        | 910.47        |         |         |        | 981.65        |         |         |        |
| L  | 995.56        | 1023.56       |         |         |        | 868.56        |         |         |        |
| L  | 1108.65       | 1136.64       |         |         |        | 755.48        |         |         |        |
| R  | 1264.75       | 1292.74       |         |         |        | <b>642.39</b> |         |         |        |
| L  | 1377.83       | 1405.83       |         |         |        | 486.29        |         |         |        |
| P  | 1474.89       | 1502.88       |         |         |        | 373.21        |         |         |        |
| E  | 1603.93       | 1631.92       |         |         |        | 276.16        |         |         |        |
| K  |               |               |         |         |        | 147.11        |         |         |        |



#19287468-1 NL: 6.49E5



---

| Reference                          |                     |         |   | P | Score | Coverage | Accession |     |       |       |
|------------------------------------|---------------------|---------|---|---|-------|----------|-----------|-----|-------|-------|
| Scan(s)                            | Sequence            | MH+     | z | P | XC    | DeltaCn  | Sp        | RSp | Ions  | Count |
| IPI:IPI00418145.4 SWISS-PROT:Q8WZ7 |                     |         |   | 1 | 8.1   | 0.0      | 0         |     |       |       |
| 19287468 - 1                       | R.ARGPDSNVLLRLPEK.V | 1778.03 | 3 | 1 | 1.316 | 0.491    | 55.0      | 6   | 14/90 | 3     |

1 of 1 peptide matches reported, 0 removed due to filtering

DTA for scans: 19287468-1  
Precursor ion: 593.33  
Mass type: mono  
Mod's: (M\* +15.99492) C=161.01468

Ion series for charge: +1

| AA | A ions        | B ions        | B* ions | Bo ions | C ions | Y ions        | Y* ions | Yo ions | Z ions |
|----|---------------|---------------|---------|---------|--------|---------------|---------|---------|--------|
| A  | 44.05         | 72.04         |         |         |        |               |         |         |        |
| R  | <b>200.15</b> | <b>228.15</b> |         |         |        | 1706.99       |         |         |        |
| G  | 257.17        | <b>285.17</b> |         |         |        | 1550.89       |         |         |        |
| P  | <b>354.22</b> | 382.22        |         |         |        | 1493.87       |         |         |        |
| D  | <b>469.25</b> | <b>497.25</b> |         |         |        | 1396.82       |         |         |        |
| S  | <b>556.28</b> | 584.28        |         |         |        | 1281.79       |         |         |        |
| N  | 670.33        | 698.32        |         |         |        | 1194.76       |         |         |        |
| V  | 769.40        | 797.39        |         |         |        | 1080.71       |         |         |        |
| L  | 882.48        | 910.47        |         |         |        | 981.65        |         |         |        |
| L  | 995.56        | 1023.56       |         |         |        | 868.56        |         |         |        |
| L  | 1108.65       | 1136.64       |         |         |        | 755.48        |         |         |        |
| R  | 1264.75       | 1292.74       |         |         |        | <b>642.39</b> |         |         |        |
| L  | 1377.83       | 1405.83       |         |         |        | 486.29        |         |         |        |
| P  | 1474.89       | 1502.88       |         |         |        | 373.21        |         |         |        |
| E  | 1603.93       | 1631.92       |         |         |        | 276.16        |         |         |        |
| K  |               |               |         |         |        | 147.11        |         |         |        |



#19287468-1 NL: 6.49E5



| Reference                                                      |                     |         |   | P | Score | Coverage | Accession |     |       |       |  |
|----------------------------------------------------------------|---------------------|---------|---|---|-------|----------|-----------|-----|-------|-------|--|
| Scan(s)                                                        | Sequence            | MH+     | z | P | XC    | DeltaCn  | Sp        | RSp | Ions  | Count |  |
| IPI:IPI00782966.1 SWISS-PROT:Q9H2Y7 TREMBL:B4DGC7;B4DZ40;Q05C4 |                     |         |   | 1 | 4.1   | 0.0      | 0         |     |       |       |  |
| 19287468 - 1                                                   | K.SLSQKQDPK.N       | 1030.55 | 2 | 1 | 1.289 | 0.531    | 59.0      | 19  | 7/24  |       |  |
| 19287468 - 1                                                   | K.LIKGGKVTSTWEDSR.T | 1777.94 | 3 | 1 | 1.235 | -        | 42.4      | 23  | 12/90 | 1     |  |

2 of 2 peptide matches reported, 0 removed due to filtering



DTA for scans: 19287468-1  
Precursor ion: 515.79  
Mass type: mono  
Mod's: (M\* +15.99492) C=161.01468

Ion series for charge: +1

| AA | A ions        | B ions        | B* ions | Bo ions | C ions | Y ions        | Y* ions | Yo ions | Z ions |
|----|---------------|---------------|---------|---------|--------|---------------|---------|---------|--------|
| S  | 60.04         | 88.04         |         |         |        |               |         |         |        |
| L  | <b>173.13</b> | <b>201.12</b> |         |         |        | 943.52        |         |         |        |
| S  | 260.16        | <b>288.16</b> |         |         |        | <b>830.44</b> |         |         |        |
| Q  | 388.22        | <b>416.21</b> |         |         |        | <b>743.40</b> |         |         |        |
| K  | 516.31        | 544.31        |         |         |        | 615.35        |         |         |        |
| Q  | 644.37        | 672.37        |         |         |        | 487.25        |         |         |        |
| D  | 759.40        | 787.39        |         |         |        | 359.19        |         |         |        |
| P  | 856.45        | 884.45        |         |         |        | <b>244.17</b> |         |         |        |
| K  |               |               |         |         |        | 147.11        |         |         |        |

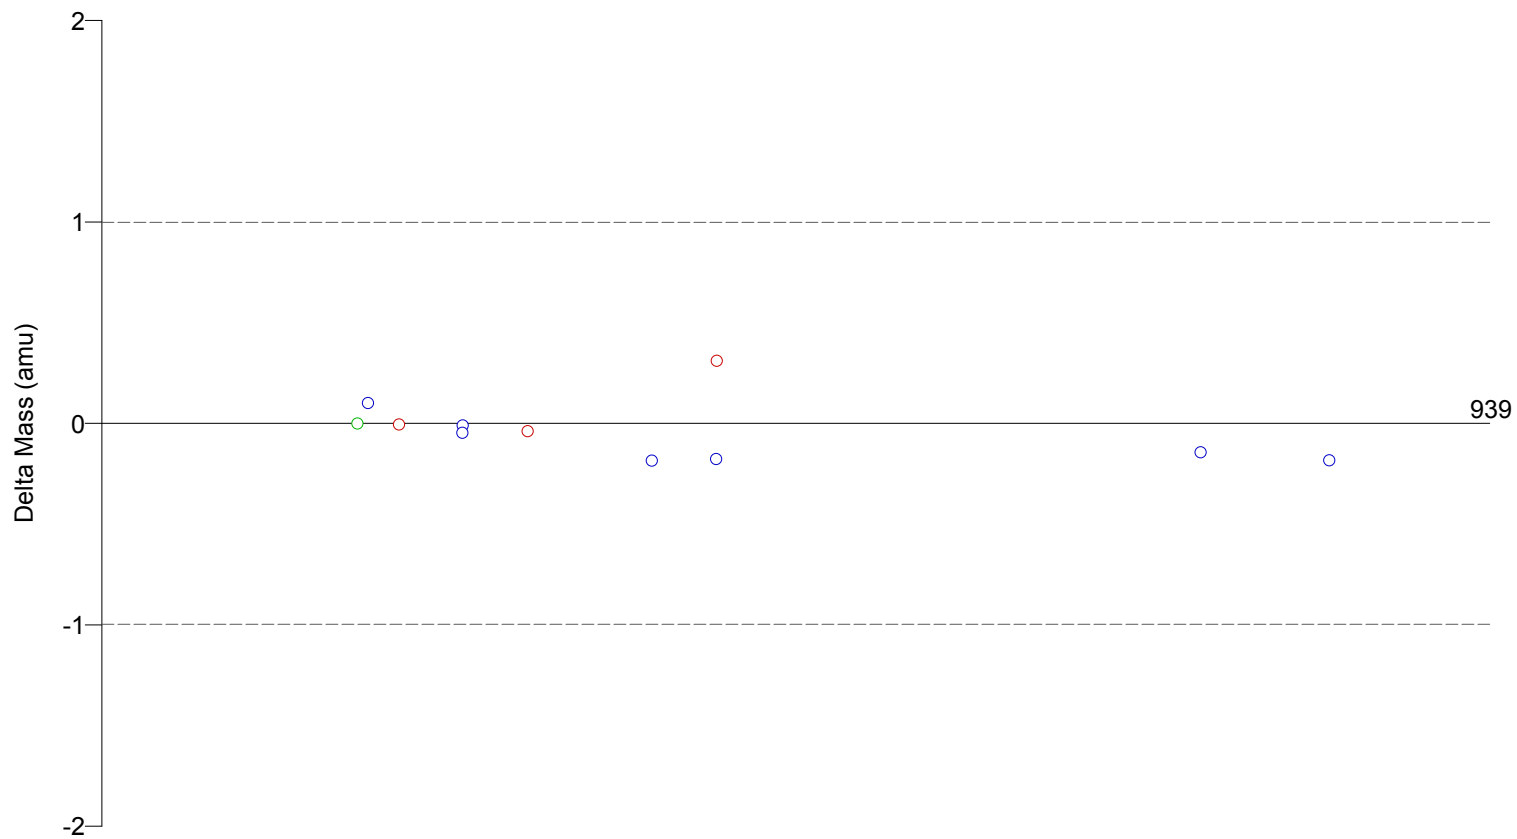

#19287468-1 NL: 6.13E5

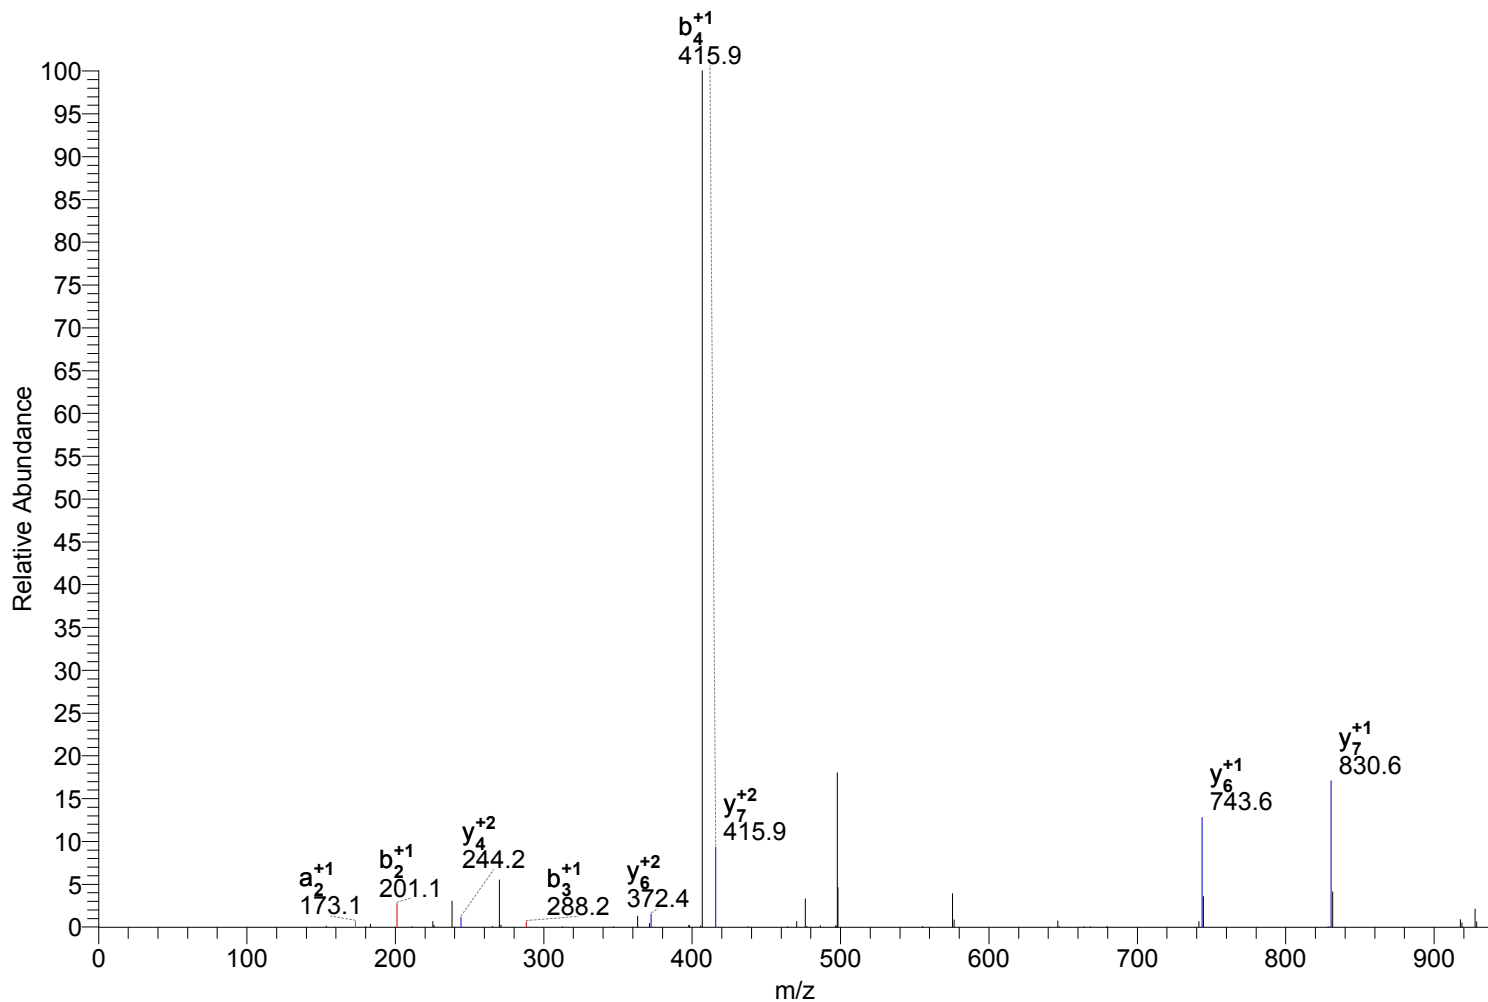

DTA for scans: 19287468-1  
Precursor ion: 593.33  
Mass type: mono  
Mod's: (M\* +15.99492) C=161.01468

Ion series for charge: +1

| AA | A ions        | B ions        | B* ions | Bo ions | C ions | Y ions        | Y* ions | Yo ions | Z ions |
|----|---------------|---------------|---------|---------|--------|---------------|---------|---------|--------|
| L  | 86.10         | 114.09        |         |         |        |               |         |         |        |
| I  | <b>199.18</b> | <b>227.18</b> |         |         |        | 1664.86       |         |         |        |
| K  | 327.28        | 355.27        |         |         |        | 1551.78       |         |         |        |
| G  | 384.30        | 412.29        |         |         |        | 1423.68       |         |         |        |
| G  | 441.32        | <b>469.31</b> |         |         |        | 1366.66       |         |         |        |
| K  | 569.41        | 597.41        |         |         |        | 1309.64       |         |         |        |
| V  | 668.48        | <b>696.48</b> |         |         |        | 1181.54       |         |         |        |
| T  | 769.53        | 797.52        |         |         |        | 1082.47       |         |         |        |
| T  | 870.58        | 898.57        |         |         |        | 981.43        |         |         |        |
| S  | 957.61        | 985.60        |         |         |        | 880.38        |         |         |        |
| T  | 1058.66       | 1086.65       |         |         |        | 793.35        |         |         |        |
| W  | 1244.74       | 1272.73       |         |         |        | <b>692.30</b> |         |         |        |
| E  | 1373.78       | 1401.77       |         |         |        | 506.22        |         |         |        |
| D  | 1488.81       | 1516.80       |         |         |        | 377.18        |         |         |        |
| S  | 1575.84       | 1603.83       |         |         |        | 262.15        |         |         |        |
| R  |               |               |         |         |        | 175.12        |         |         |        |

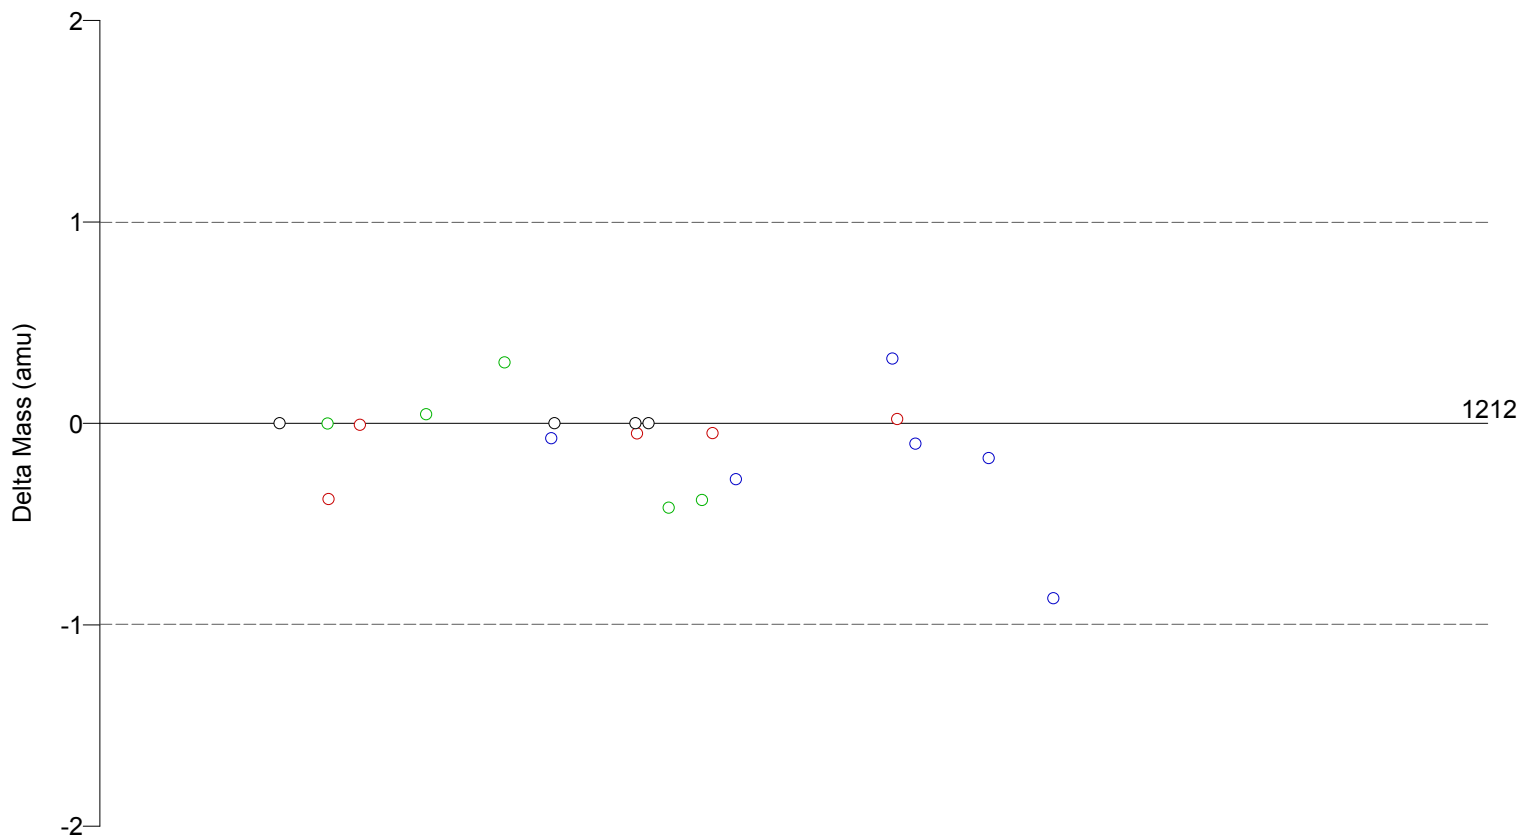

#19287468-1 NL: 6.49E5

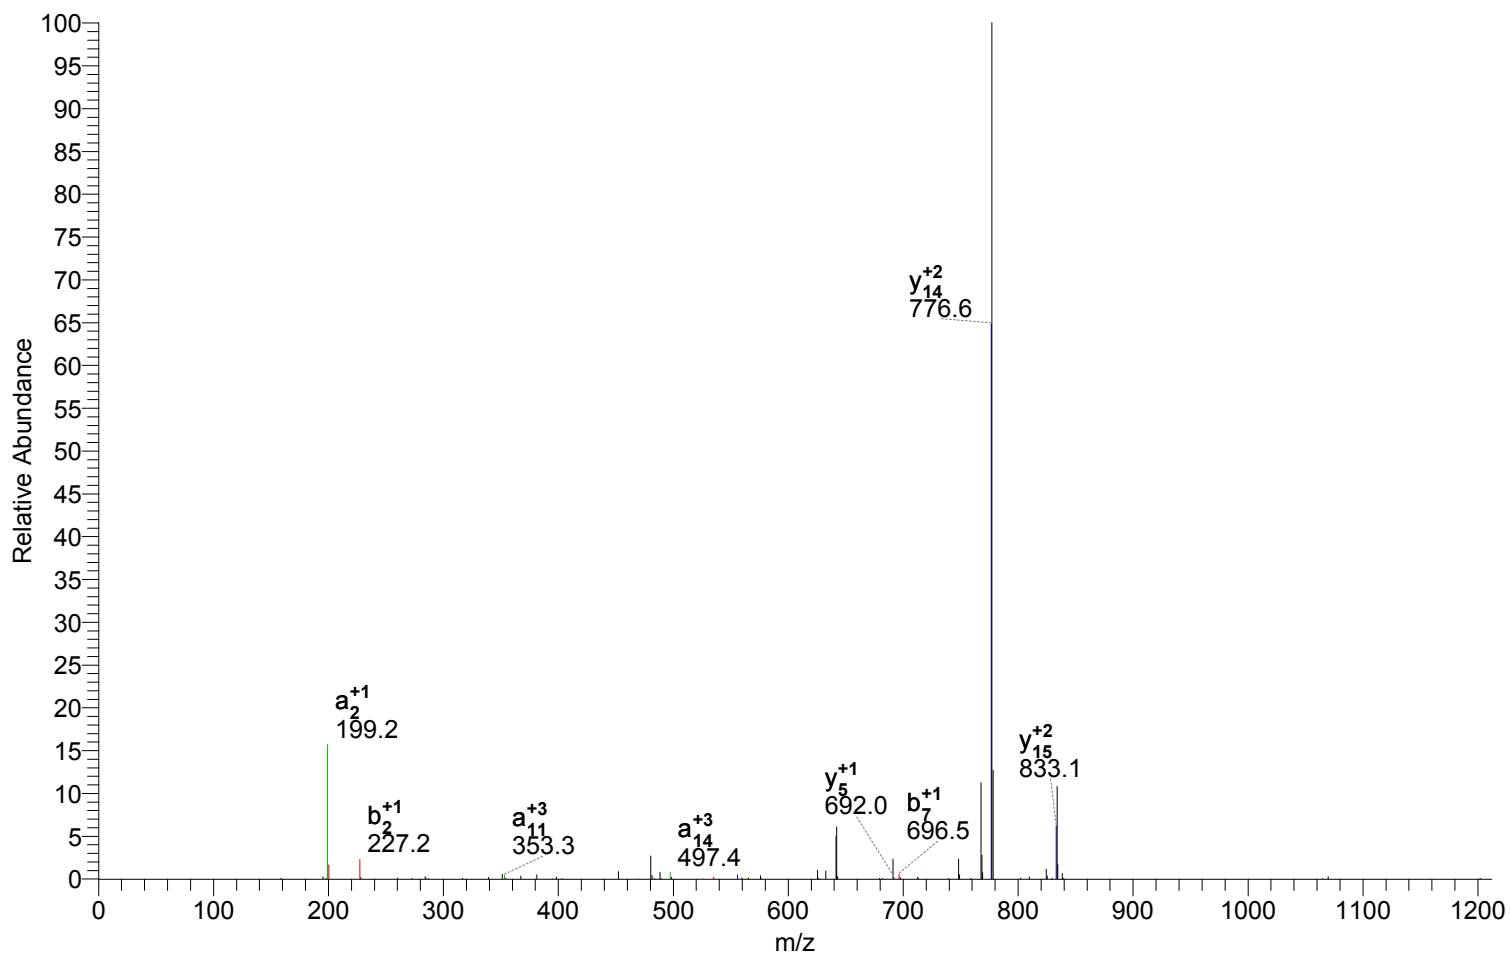

---

| Reference                                                      |                |         |   | P | Score | Coverage | Accession |     |      |       |
|----------------------------------------------------------------|----------------|---------|---|---|-------|----------|-----------|-----|------|-------|
| Scan(s)                                                        | Sequence       | MH+     | z | P | XC    | DeltaCn  | Sp        | RSp | Ions | Count |
| IPI:IPI00166518.6 SWISS-PROT:Q6WCQ1-3 TREMBL:Q5ZEZ6;Q96EE5 ENS |                |         |   | 1 | 8.1   | 0.0      | 0         |     |      |       |
| 19287468 - 1                                                   | K.EEESAMSSDR.M | 1140.45 | 2 | 1 | 1.408 | 0.594    | 105.5     | 5   | 8/27 | 4     |

---

1 of 1 peptide matches reported, 0 removed due to filtering

DTA for scans: 19287468-1  
Precursor ion: 570.74  
Mass type: mono  
Mod's: (M\* +15.99492) C=161.01468

Ion series for charge: +1

| AA | A ions        | B ions        | B* ions | Bo ions | C ions | Y ions        | Y* ions | Yo ions | Z ions |
|----|---------------|---------------|---------|---------|--------|---------------|---------|---------|--------|
| E  | 102.05        | 130.05        |         |         |        |               |         |         |        |
| E  | <b>231.10</b> | 259.09        |         |         |        | 1011.40       |         |         |        |
| E  | 360.14        | <b>388.14</b> |         |         |        | 882.36        |         |         |        |
| S  | 447.17        | 475.17        |         |         |        | <b>753.32</b> |         |         |        |
| A  | <b>518.21</b> | 546.20        |         |         |        | 666.29        |         |         |        |
| M  | 649.25        | 677.24        |         |         |        | 595.25        |         |         |        |
| S  | <b>736.28</b> | 764.28        |         |         |        | 464.21        |         |         |        |
| S  | 823.31        | 851.31        |         |         |        | 377.18        |         |         |        |
| D  | 938.34        | <b>966.34</b> |         |         |        | <b>290.15</b> |         |         |        |
| R  |               |               |         |         |        | <b>175.12</b> |         |         |        |

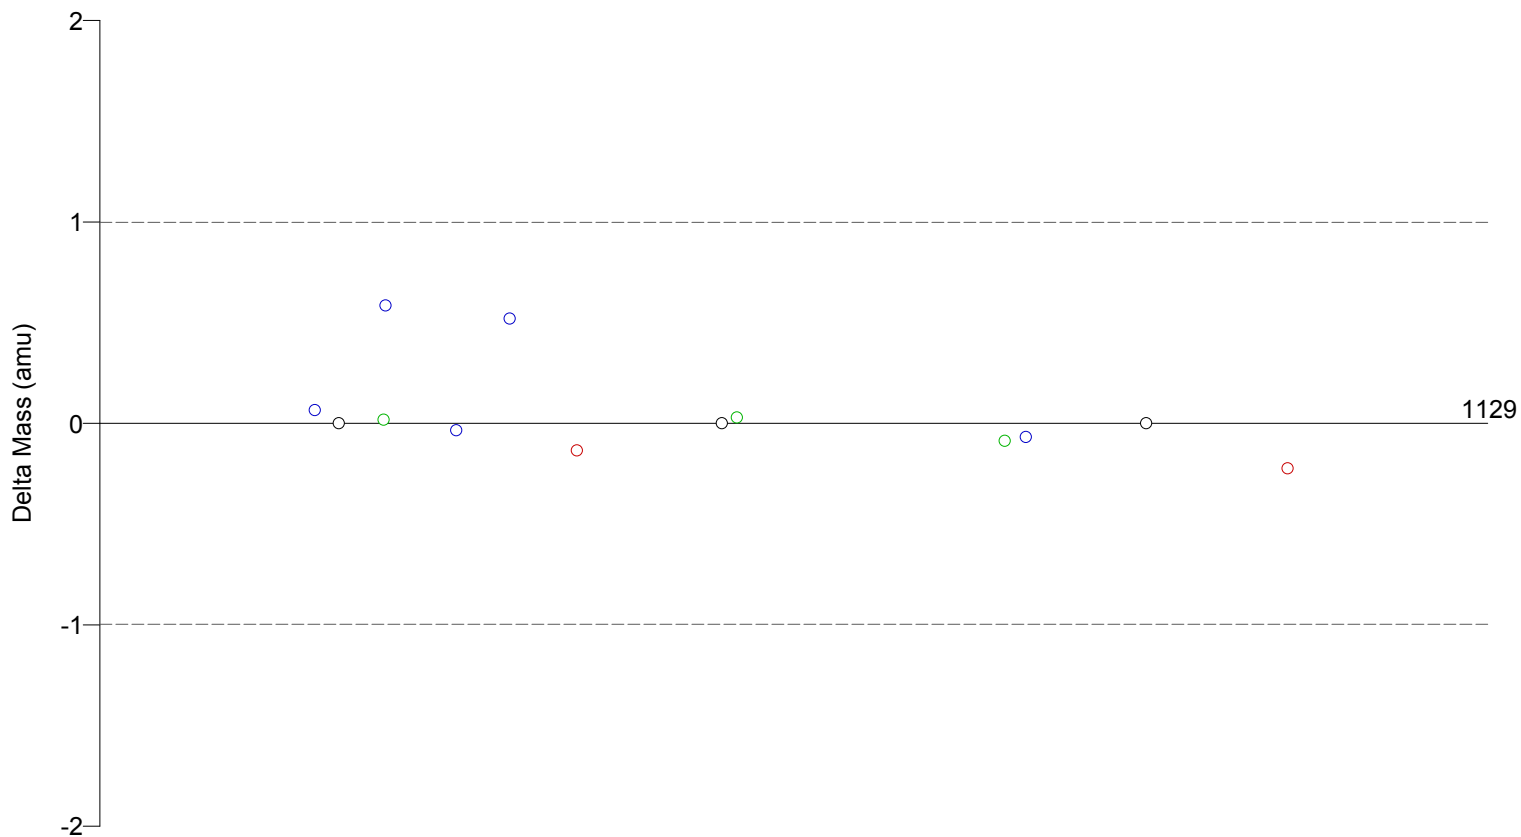

#19287468-1 NL: 8.98E6

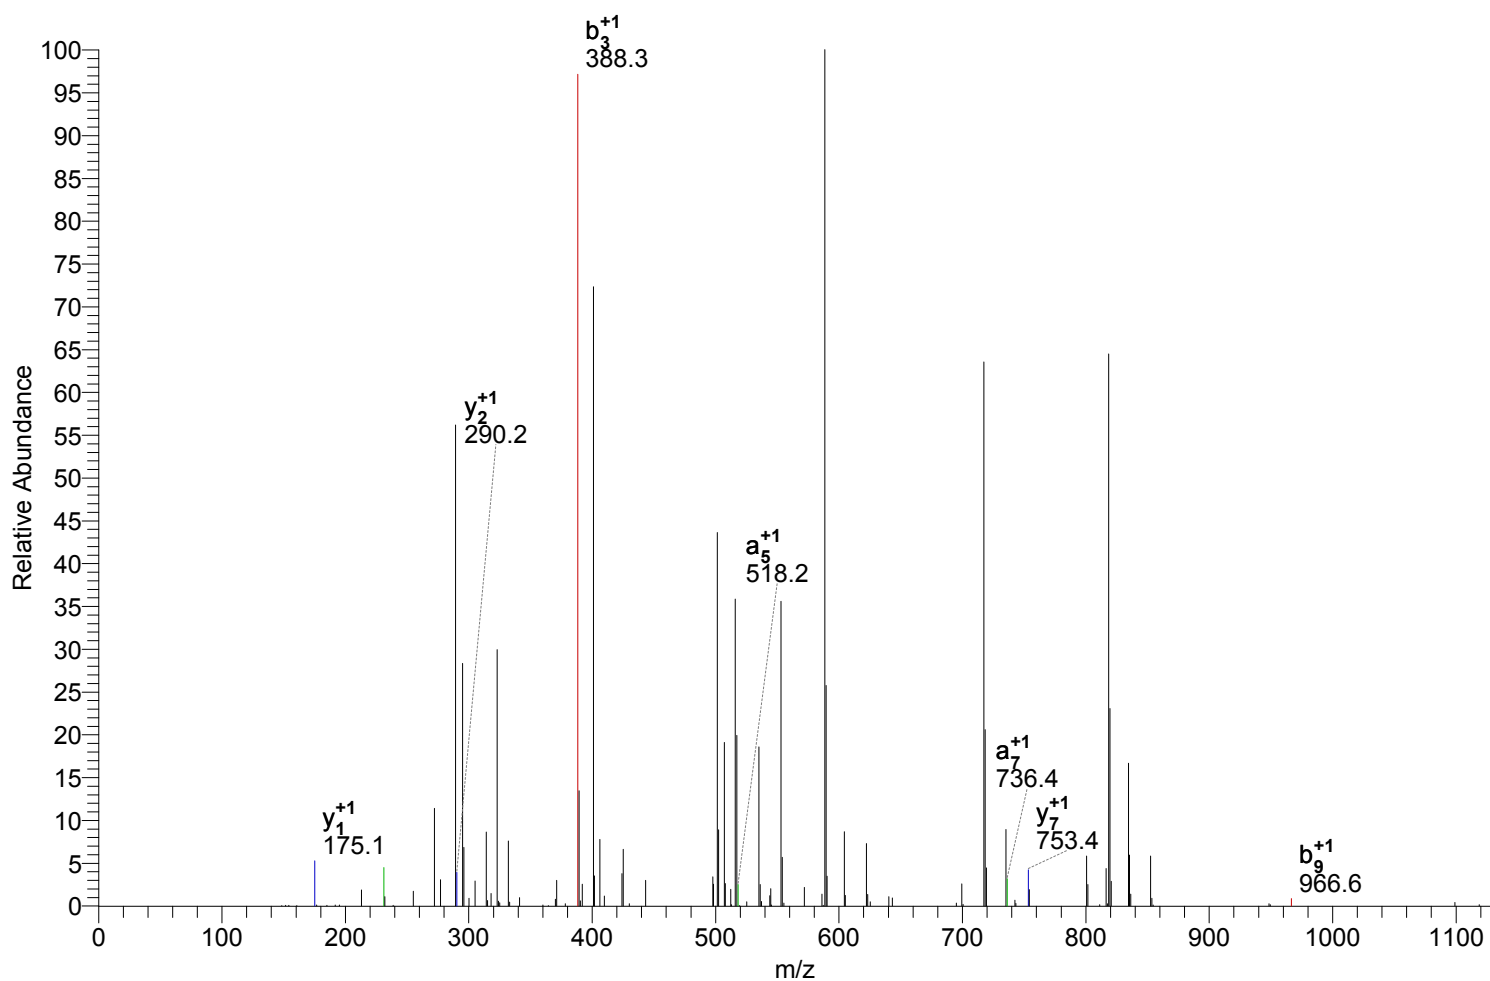

---

| Reference                          |                |         |   | P | Score | Coverage | Accession |     |      |       |
|------------------------------------|----------------|---------|---|---|-------|----------|-----------|-----|------|-------|
| Scan(s)                            | Sequence       | MH+     | z | P | XC    | DeltaCn  | Sp        | RSp | Ions | Count |
| IPI:IPI00295457.6 SWISS-PROT:Q6WCQ |                |         |   | 1 | 8.1   | 0.0      | 0         |     |      |       |
| 19287468 - 1                       | K.EEESAMSSDR.M | 1140.45 | 2 | 1 | 1.408 | 0.594    | 105.5     | 5   | 8/27 | 4     |

---

1 of 1 peptide matches reported, 0 removed due to filtering



DTA for scans: 19287468-1  
Precursor ion: 570.74  
Mass type: mono  
Mod's: (M\* +15.99492) C=161.01468

Ion series for charge: +1

| AA | A ions        | B ions        | B* ions | Bo ions | C ions | Y ions        | Y* ions | Yo ions | Z ions |
|----|---------------|---------------|---------|---------|--------|---------------|---------|---------|--------|
| E  | 102.05        | 130.05        |         |         |        |               |         |         |        |
| E  | <b>231.10</b> | 259.09        |         |         |        | 1011.40       |         |         |        |
| E  | 360.14        | <b>388.14</b> |         |         |        | 882.36        |         |         |        |
| S  | 447.17        | 475.17        |         |         |        | <b>753.32</b> |         |         |        |
| A  | <b>518.21</b> | 546.20        |         |         |        | 666.29        |         |         |        |
| M  | 649.25        | 677.24        |         |         |        | 595.25        |         |         |        |
| S  | <b>736.28</b> | 764.28        |         |         |        | 464.21        |         |         |        |
| S  | 823.31        | 851.31        |         |         |        | 377.18        |         |         |        |
| D  | 938.34        | <b>966.34</b> |         |         |        | <b>290.15</b> |         |         |        |
| R  |               |               |         |         |        | <b>175.12</b> |         |         |        |

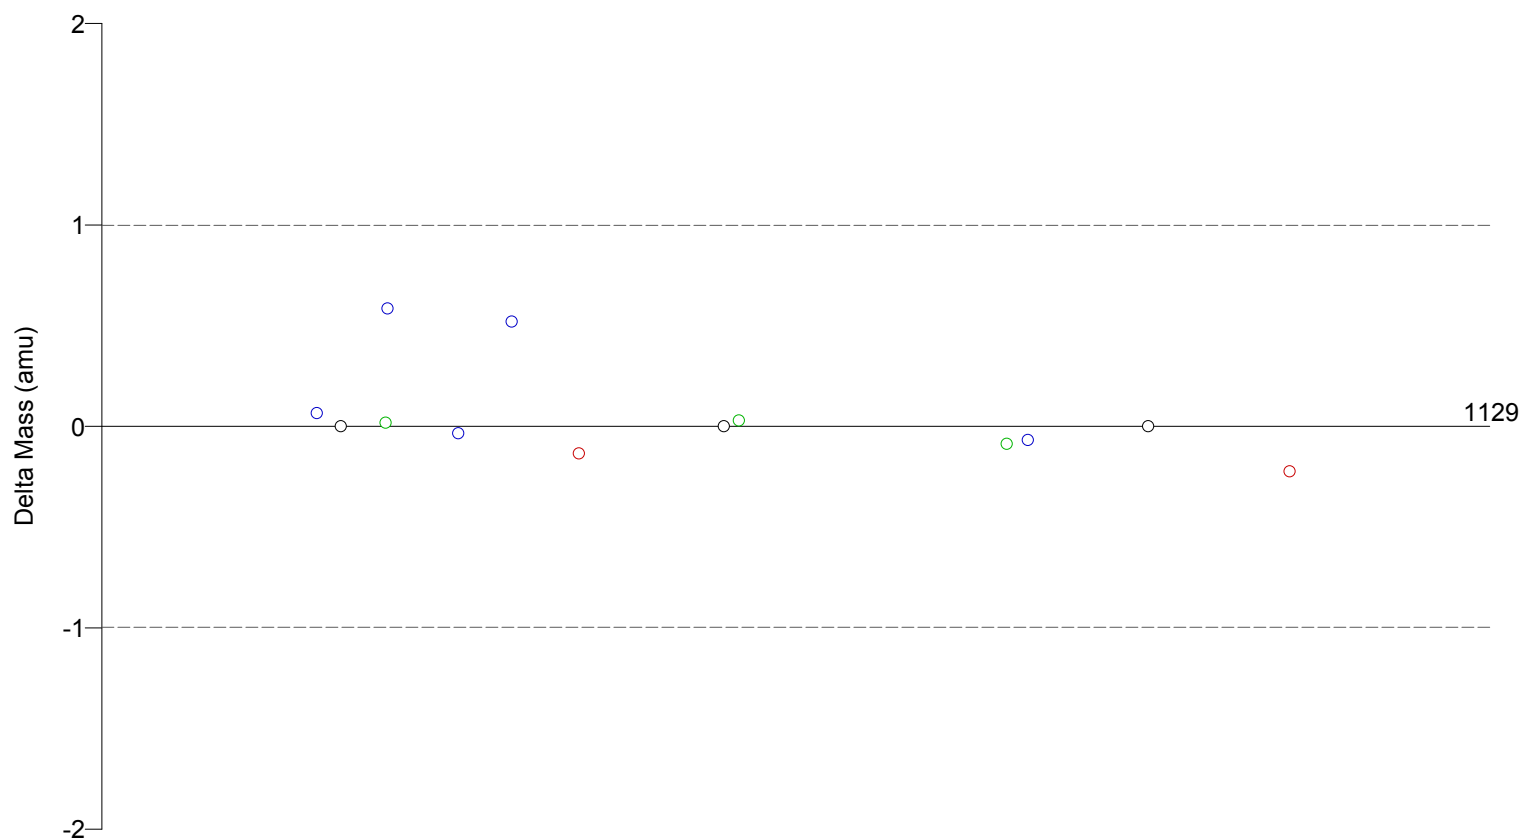

#19287468-1 NL: 8.98E6

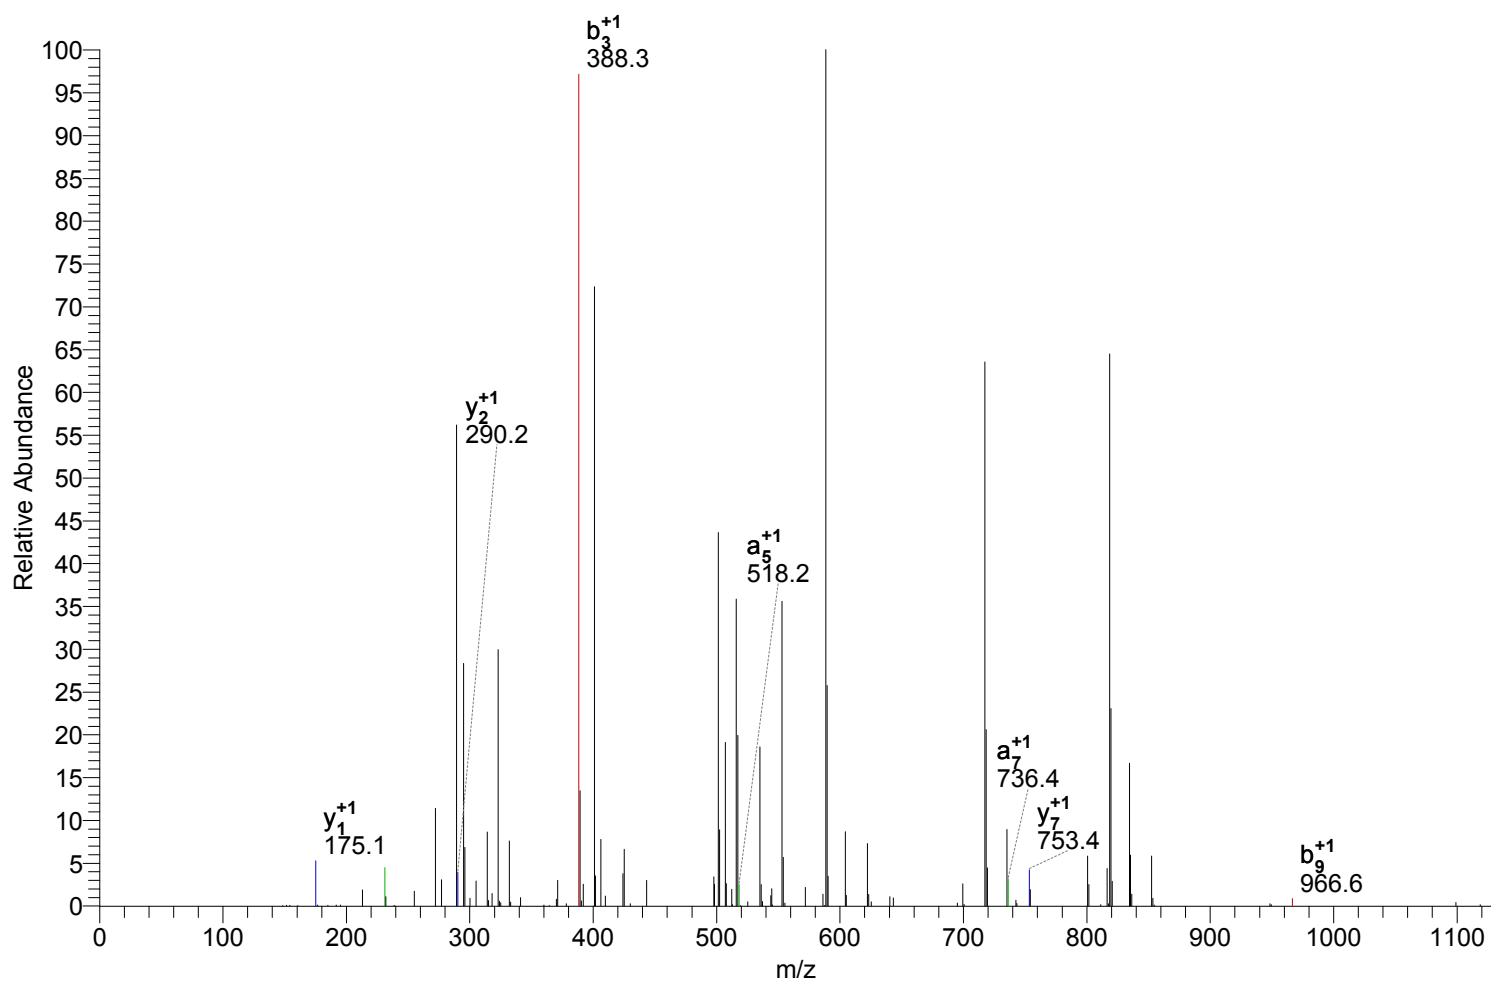

---

| Reference                          |                |         |   | P | Score | Coverage | Accession |     |      |       |
|------------------------------------|----------------|---------|---|---|-------|----------|-----------|-----|------|-------|
| Scan(s)                            | Sequence       | MH+     | z | P | XC    | DeltaCn  | Sp        | RSp | Ions | Count |
| IPI:IPI00305344.7 SWISS-PROT:Q6WCQ |                |         |   | 1 | 8.1   | 0.0      | 0         |     |      |       |
| 19287468 - 1                       | K.EEESAMSSDR.M | 1140.45 | 2 | 1 | 1.408 | 0.594    | 105.5     | 5   | 8/27 | 4     |

---

1 of 1 peptide matches reported, 0 removed due to filtering

DTA for scans: 19287468-1  
Precursor ion: 570.74  
Mass type: mono  
Mod's: (M\* +15.99492) C=161.01468

Ion series for charge: +1

| AA | A ions        | B ions        | B* ions | Bo ions | C ions | Y ions        | Y* ions | Yo ions | Z ions |
|----|---------------|---------------|---------|---------|--------|---------------|---------|---------|--------|
| E  | 102.05        | 130.05        |         |         |        |               |         |         |        |
| E  | <b>231.10</b> | 259.09        |         |         |        | 1011.40       |         |         |        |
| E  | 360.14        | <b>388.14</b> |         |         |        | 882.36        |         |         |        |
| S  | 447.17        | 475.17        |         |         |        | <b>753.32</b> |         |         |        |
| A  | <b>518.21</b> | 546.20        |         |         |        | 666.29        |         |         |        |
| M  | 649.25        | 677.24        |         |         |        | 595.25        |         |         |        |
| S  | <b>736.28</b> | 764.28        |         |         |        | 464.21        |         |         |        |
| S  | 823.31        | 851.31        |         |         |        | 377.18        |         |         |        |
| D  | 938.34        | <b>966.34</b> |         |         |        | <b>290.15</b> |         |         |        |
| R  |               |               |         |         |        | <b>175.12</b> |         |         |        |

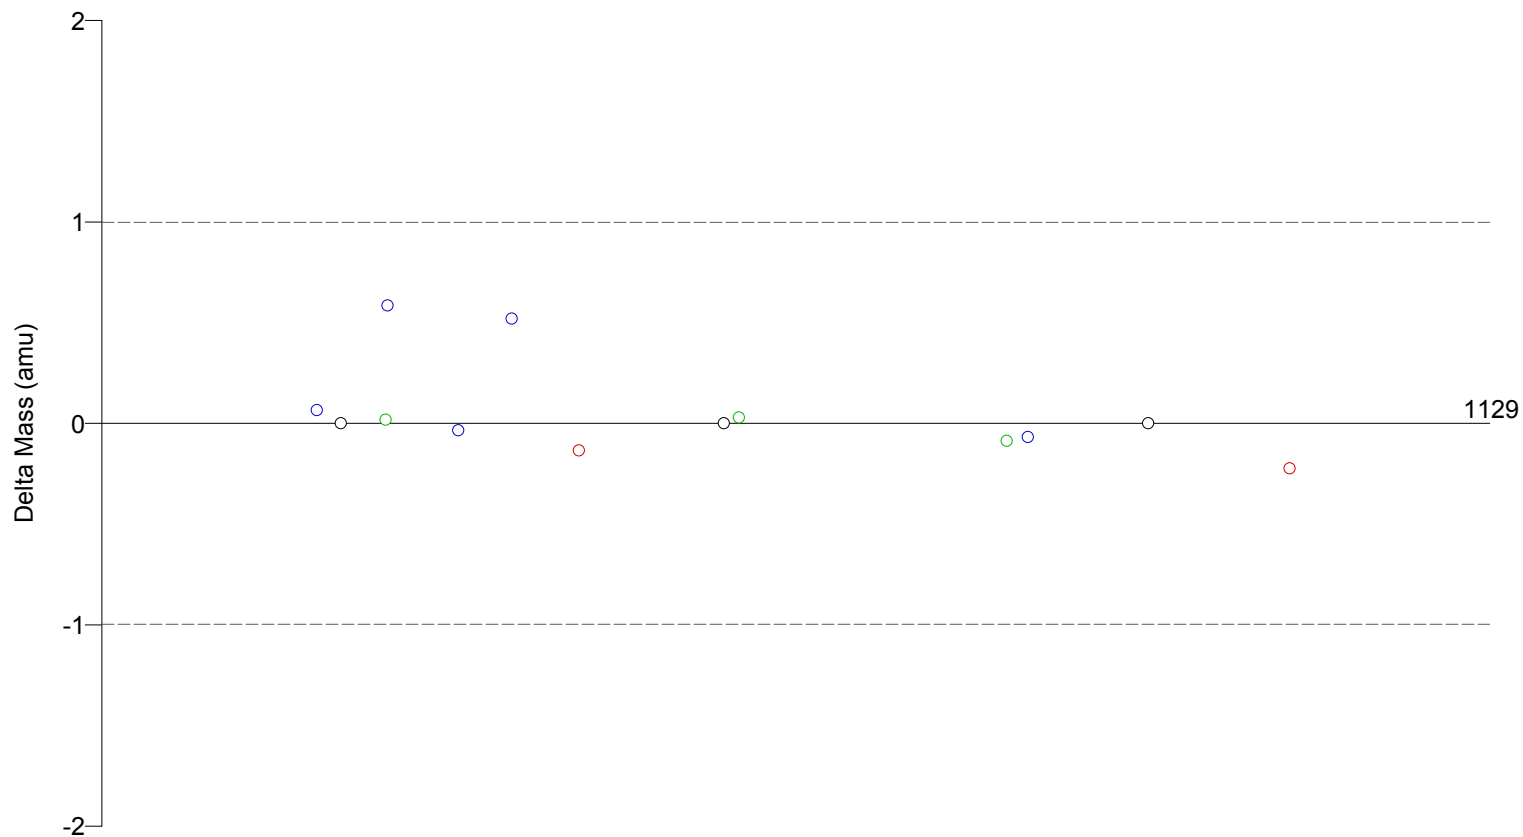

#19287468-1 NL: 8.98E6



---

| Reference                          |                |         |   | P | Score | Coverage | Accession |     |      |       |
|------------------------------------|----------------|---------|---|---|-------|----------|-----------|-----|------|-------|
| Scan(s)                            | Sequence       | MH+     | z | P | XC    | DeltaCn  | Sp        | RSp | Ions | Count |
| IPI:IPI00796460.1 TREMBL:A8MTJ7 VE |                |         |   | 1 | 8.1   | 0.0      | 0         |     |      |       |
| 19287468 - 1                       | K.EEESAMSSDR.M | 1140.45 | 2 | 1 | 1.408 | 0.594    | 105.5     | 5   | 8/27 | 4     |

---

1 of 1 peptide matches reported, 0 removed due to filtering

DTA for scans: 19287468-1  
Precursor ion: 570.74  
Mass type: mono  
Mod's: (M\* +15.99492) C=161.01468

Ion series for charge: +1

| AA | A ions        | B ions        | B* ions | Bo ions | C ions | Y ions        | Y* ions | Yo ions | Z ions |
|----|---------------|---------------|---------|---------|--------|---------------|---------|---------|--------|
| E  | 102.05        | 130.05        |         |         |        |               |         |         |        |
| E  | <b>231.10</b> | 259.09        |         |         |        | 1011.40       |         |         |        |
| E  | 360.14        | <b>388.14</b> |         |         |        | 882.36        |         |         |        |
| S  | 447.17        | 475.17        |         |         |        | <b>753.32</b> |         |         |        |
| A  | <b>518.21</b> | 546.20        |         |         |        | 666.29        |         |         |        |
| M  | 649.25        | 677.24        |         |         |        | 595.25        |         |         |        |
| S  | <b>736.28</b> | 764.28        |         |         |        | 464.21        |         |         |        |
| S  | 823.31        | 851.31        |         |         |        | 377.18        |         |         |        |
| D  | 938.34        | <b>966.34</b> |         |         |        | <b>290.15</b> |         |         |        |
| R  |               |               |         |         |        | <b>175.12</b> |         |         |        |



#19287468-1 NL: 8.98E6





---

| Reference                          |                |         |   | P | Score | Coverage | Accession |     |      |       |
|------------------------------------|----------------|---------|---|---|-------|----------|-----------|-----|------|-------|
| Scan(s)                            | Sequence       | MH+     | z | P | XC    | DeltaCn  | Sp        | RSp | Ions | Count |
| IPI:IPI00797228.1 VEGA:OTTHUMP0000 |                |         |   | 1 | 8.1   | 0.0      | 0         |     |      |       |
| 19287468 - 1                       | K.EEESAMSSDR.M | 1140.45 | 2 | 1 | 1.408 | 0.594    | 105.5     | 5   | 8/27 | 4     |

---

1 of 1 peptide matches reported, 0 removed due to filtering

DTA for scans: 19287468-1  
Precursor ion: 570.74  
Mass type: mono  
Mod's: (M\* +15.99492) C=161.01468

Ion series for charge: +1

| AA | A ions        | B ions        | B* ions | Bo ions | C ions | Y ions        | Y* ions | Yo ions | Z ions |
|----|---------------|---------------|---------|---------|--------|---------------|---------|---------|--------|
| E  | 102.05        | 130.05        |         |         |        |               |         |         |        |
| E  | <b>231.10</b> | 259.09        |         |         |        | 1011.40       |         |         |        |
| E  | 360.14        | <b>388.14</b> |         |         |        | 882.36        |         |         |        |
| S  | 447.17        | 475.17        |         |         |        | <b>753.32</b> |         |         |        |
| A  | <b>518.21</b> | 546.20        |         |         |        | 666.29        |         |         |        |
| M  | 649.25        | 677.24        |         |         |        | 595.25        |         |         |        |
| S  | <b>736.28</b> | 764.28        |         |         |        | 464.21        |         |         |        |
| S  | 823.31        | 851.31        |         |         |        | 377.18        |         |         |        |
| D  | 938.34        | <b>966.34</b> |         |         |        | <b>290.15</b> |         |         |        |
| R  |               |               |         |         |        | <b>175.12</b> |         |         |        |



#19287468-1 NL: 8.98E6



---

| Reference                           |                           |        |   | P   | Score | Coverage | Accession |     |       |       |  |
|-------------------------------------|---------------------------|--------|---|-----|-------|----------|-----------|-----|-------|-------|--|
| Scan(s)                             | Sequence                  | MH+    | z | P   | XC    | DeltaCn  | Sp        | RSp | Ions  | Count |  |
| IPI:IPI00382420.1 SWISS-PROT:P01700 | Tax_Id=9606 Gene_Symbol=- |        |   | 1   | 10.1  | 0.0      | 0         |     |       |       |  |
|                                     | K.RPSGVPDR.F              | 883.47 | 2 | 0.1 | 2.914 | 0.384    | 612.6     | 1   | 14/21 | 8     |  |

1 of 1 peptide matches reported, 0 removed due to filtering

DTA for scan: 0  
Precursor ion: 442.24  
Mass type: mono  
Mod's: (M\* +15.99492) C=161.01468

Ion series for charge: +1

| AA | A ions        | B ions        | B* ions | Bo ions | C ions | Y ions        | Y* ions | Yo ions | Z ions |
|----|---------------|---------------|---------|---------|--------|---------------|---------|---------|--------|
| R  | 129.11        | <b>157.11</b> |         |         |        |               |         |         |        |
| P  | 226.17        | <b>254.16</b> |         |         |        | <b>727.37</b> |         |         |        |
| S  | 313.20        | 341.19        |         |         |        | <b>630.32</b> |         |         |        |
| G  | <b>370.22</b> | 398.21        |         |         |        | <b>543.29</b> |         |         |        |
| V  | <b>469.29</b> | <b>497.28</b> |         |         |        | 486.27        |         |         |        |
| P  | 566.34        | <b>594.34</b> |         |         |        | <b>387.20</b> |         |         |        |
| D  | 681.37        | <b>709.36</b> |         |         |        | 290.15        |         |         |        |
| R  |               |               |         |         |        | <b>175.12</b> |         |         |        |

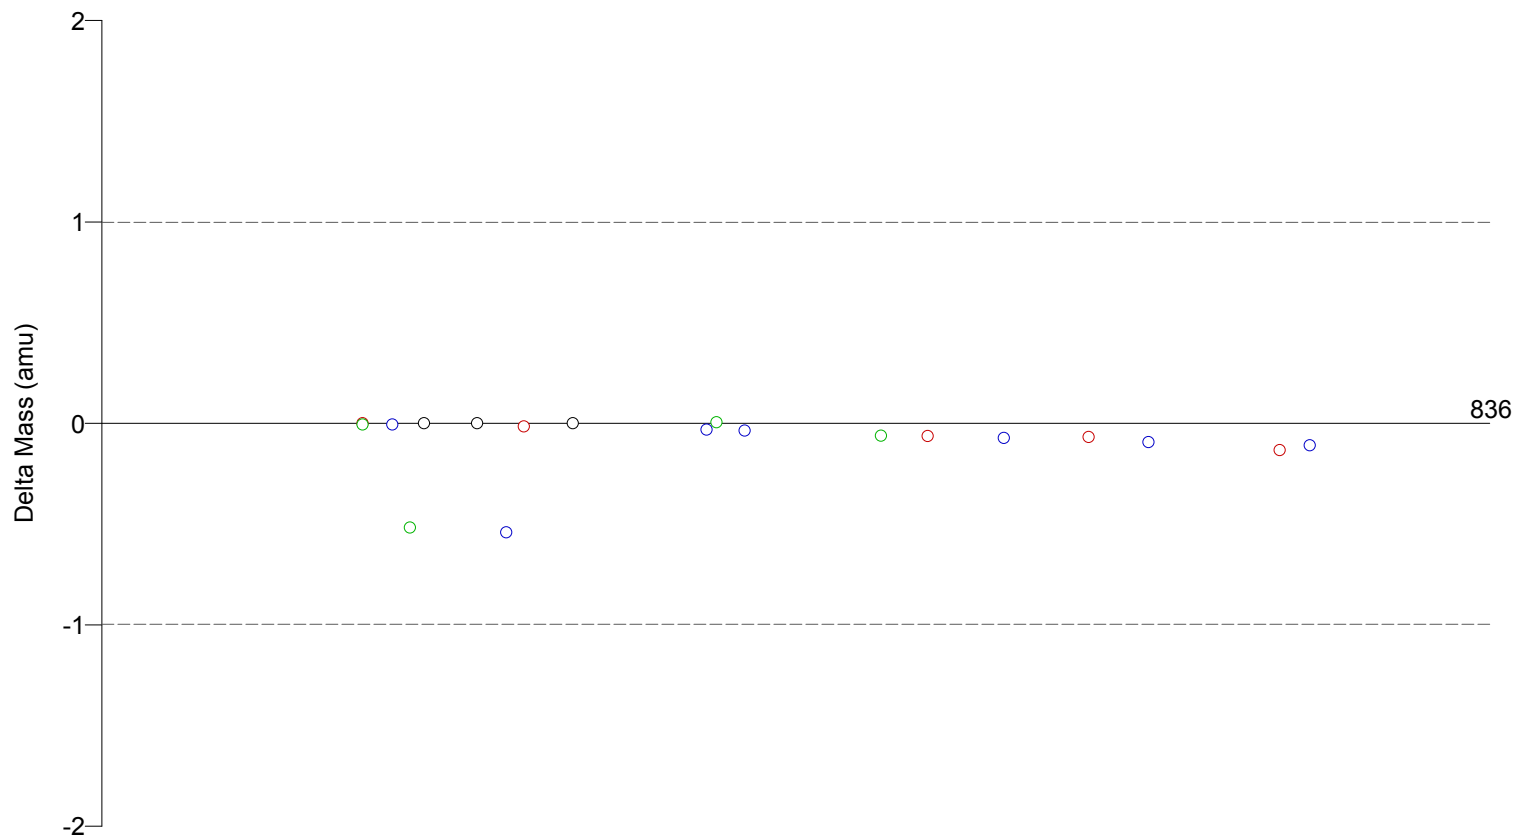

#0-0 NL: 6.35E5

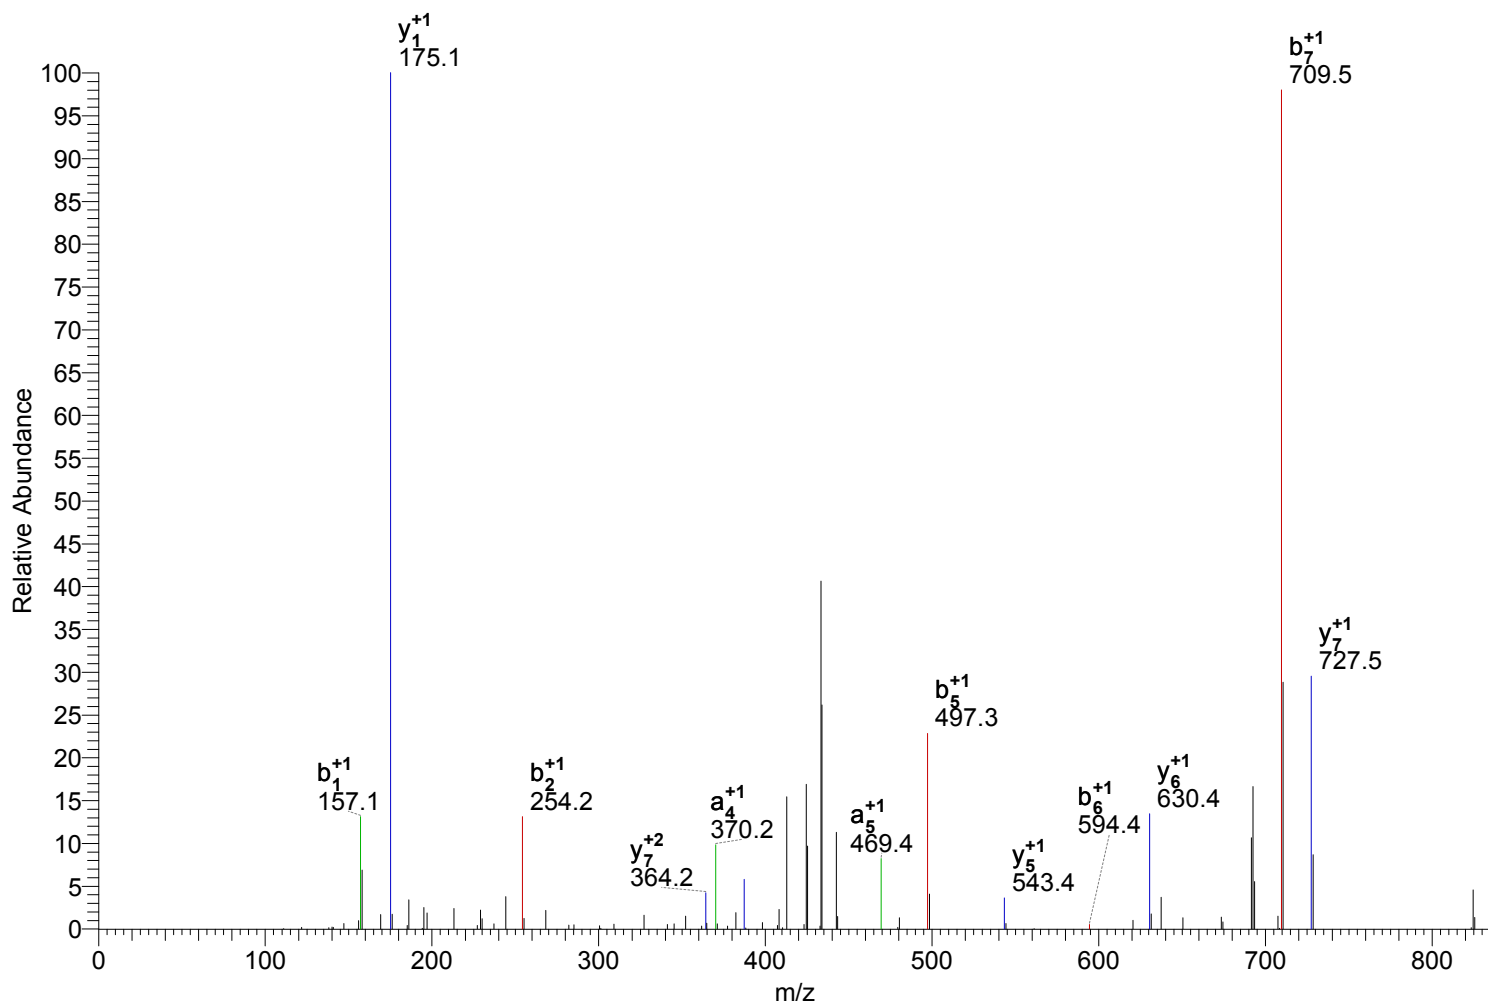

---

| Reference                          |              |        |   | P   | Score | Coverage | Accession |     |       |       |
|------------------------------------|--------------|--------|---|-----|-------|----------|-----------|-----|-------|-------|
| Scan(s)                            | Sequence     | MH+    | z | P   | XC    | DeltaCn  | Sp        | RSp | Ions  | Count |
| IPI:IPI00382426.1 SWISS-PROT:P0170 |              |        |   | 1   | 10.1  | 0.0      | 0         |     |       |       |
|                                    | K.RPSGVPDR.F | 883.47 | 2 | 0.1 | 2.914 | 0.384    | 612.6     | 1   | 14/21 | 8     |

---

1 of 1 peptide matches reported, 0 removed due to filtering

DTA for scan: 0  
Precursor ion: 442.24  
Mass type: mono  
Mod's: (M\* +15.99492) C=161.01468

Ion series for charge: +1

| AA | A ions        | B ions        | B* ions | Bo ions | C ions | Y ions        | Y* ions | Yo ions | Z ions |
|----|---------------|---------------|---------|---------|--------|---------------|---------|---------|--------|
| R  | 129.11        | <b>157.11</b> |         |         |        |               |         |         |        |
| P  | 226.17        | <b>254.16</b> |         |         |        | <b>727.37</b> |         |         |        |
| S  | 313.20        | 341.19        |         |         |        | <b>630.32</b> |         |         |        |
| G  | <b>370.22</b> | 398.21        |         |         |        | <b>543.29</b> |         |         |        |
| V  | <b>469.29</b> | <b>497.28</b> |         |         |        | 486.27        |         |         |        |
| P  | 566.34        | <b>594.34</b> |         |         |        | <b>387.20</b> |         |         |        |
| D  | 681.37        | <b>709.36</b> |         |         |        | 290.15        |         |         |        |
| R  |               |               |         |         |        | <b>175.12</b> |         |         |        |





#0-0 NL: 6.35E5



---

| Reference                          |              |        |   | P   | Score | Coverage | Accession |     |       |       |
|------------------------------------|--------------|--------|---|-----|-------|----------|-----------|-----|-------|-------|
| Scan(s)                            | Sequence     | MH+    | z | P   | XC    | DeltaCn  | Sp        | RSp | Ions  | Count |
| IPI:IPI00382427.1 SWISS-PROT:P0170 |              |        |   | 1   | 10.1  | 0.0      | 0         |     |       |       |
|                                    | K.RPSGVPDR.F | 883.47 | 2 | 0.1 | 2.914 | 0.384    | 612.6     | 1   | 14/21 | 8     |

1 of 1 peptide matches reported, 0 removed due to filtering

DTA for scan: 0  
Precursor ion: 442.24  
Mass type: mono  
Mod's: (M\* +15.99492) C=161.01468

Ion series for charge: +1

| AA | A ions        | B ions        | B* ions | Bo ions | C ions | Y ions        | Y* ions | Yo ions | Z ions |
|----|---------------|---------------|---------|---------|--------|---------------|---------|---------|--------|
| R  | 129.11        | <b>157.11</b> |         |         |        |               |         |         |        |
| P  | 226.17        | <b>254.16</b> |         |         |        | <b>727.37</b> |         |         |        |
| S  | 313.20        | 341.19        |         |         |        | <b>630.32</b> |         |         |        |
| G  | <b>370.22</b> | 398.21        |         |         |        | <b>543.29</b> |         |         |        |
| V  | <b>469.29</b> | <b>497.28</b> |         |         |        | 486.27        |         |         |        |
| P  | 566.34        | <b>594.34</b> |         |         |        | <b>387.20</b> |         |         |        |
| D  | 681.37        | <b>709.36</b> |         |         |        | 290.15        |         |         |        |
| R  |               |               |         |         |        | <b>175.12</b> |         |         |        |



#0-0 NL: 6.35E5

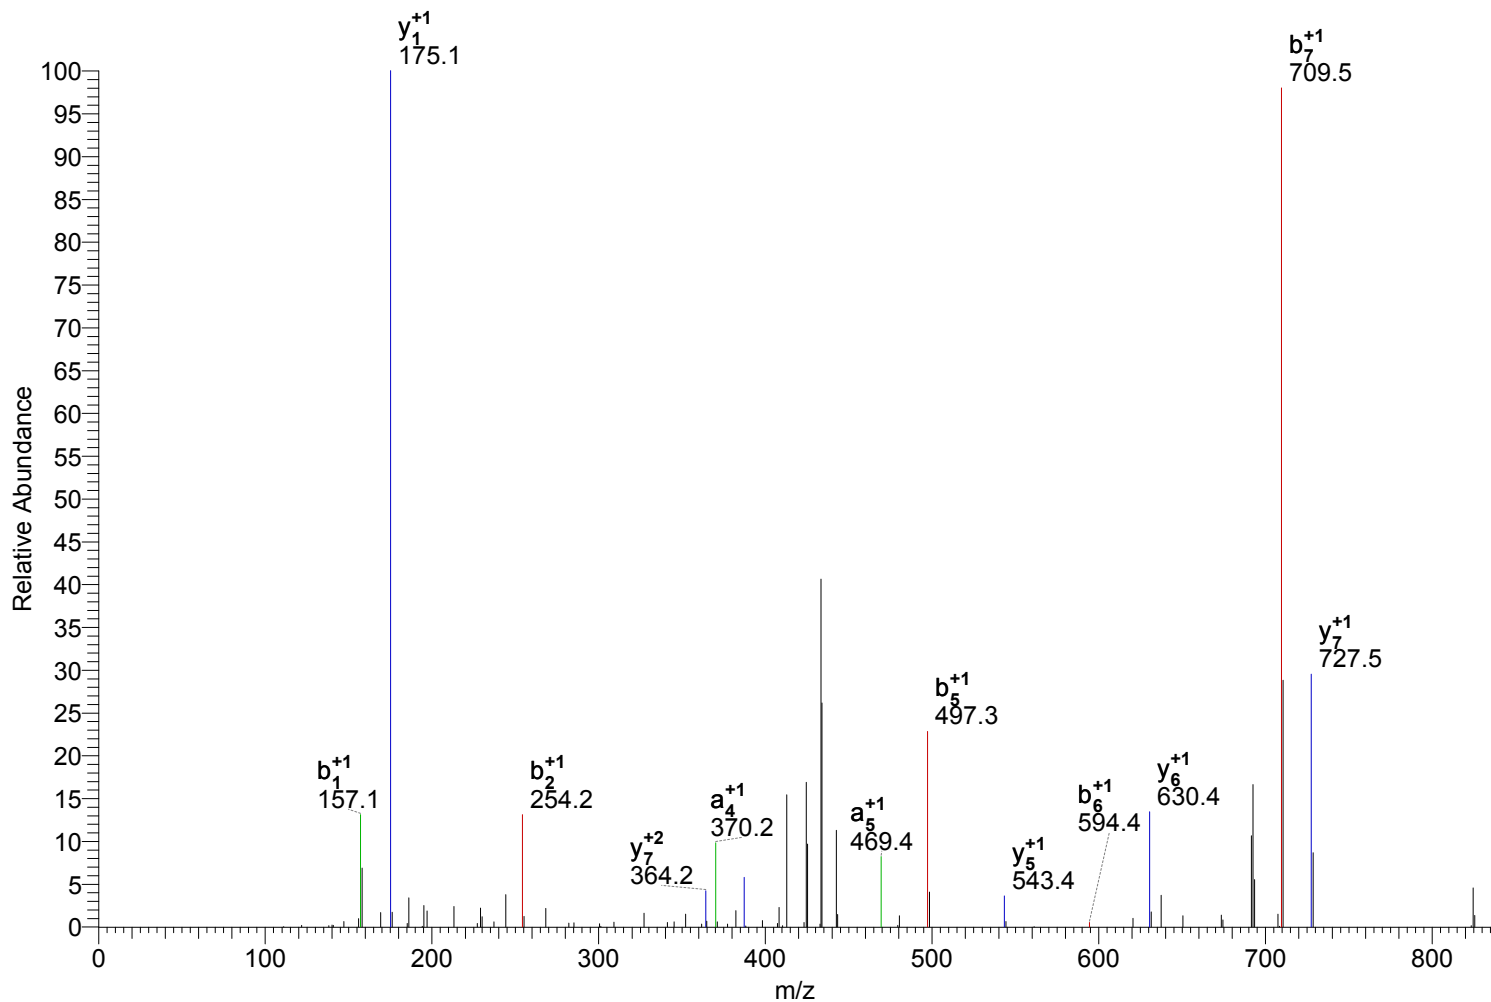

---

| Reference                          |              |        |   | P   | Score | Coverage | Accession |     |       |       |
|------------------------------------|--------------|--------|---|-----|-------|----------|-----------|-----|-------|-------|
| Scan(s)                            | Sequence     | MH+    | z | P   | XC    | DeltaCn  | Sp        | RSp | Ions  | Count |
| IPI:IPI00382434.1 SWISS-PROT:P0171 |              |        |   | 1   | 10.1  | 0.0      | 0         |     |       |       |
|                                    | K.RPSGVPDR.F | 883.47 | 2 | 0.1 | 2.914 | 0.384    | 612.6     | 1   | 14/21 | 8     |

---

1 of 1 peptide matches reported, 0 removed due to filtering

DTA for scan: 0  
Precursor ion: 442.24  
Mass type: mono  
Mod's: (M\* +15.99492) C=161.01468

Ion series for charge: +1

| AA | A ions        | B ions        | B* ions | Bo ions | C ions | Y ions        | Y* ions | Yo ions | Z ions |
|----|---------------|---------------|---------|---------|--------|---------------|---------|---------|--------|
| R  | 129.11        | <b>157.11</b> |         |         |        |               |         |         |        |
| P  | 226.17        | <b>254.16</b> |         |         |        | <b>727.37</b> |         |         |        |
| S  | 313.20        | 341.19        |         |         |        | <b>630.32</b> |         |         |        |
| G  | <b>370.22</b> | 398.21        |         |         |        | <b>543.29</b> |         |         |        |
| V  | <b>469.29</b> | <b>497.28</b> |         |         |        | 486.27        |         |         |        |
| P  | 566.34        | <b>594.34</b> |         |         |        | <b>387.20</b> |         |         |        |
| D  | 681.37        | <b>709.36</b> |         |         |        | 290.15        |         |         |        |
| R  |               |               |         |         |        | <b>175.12</b> |         |         |        |



#0-0 NL: 6.35E5



---

| Reference         |                  |        |   | P   | Score | Coverage | Accession |     |       |       |
|-------------------|------------------|--------|---|-----|-------|----------|-----------|-----|-------|-------|
| Scan(s)           | Sequence         | MH+    | z | P   | XC    | DeltaCn  | Sp        | RSp | Ions  | Count |
| IPI:IPI00383016.1 | TREMBL:Q8TE63 Ta |        |   | 1   | 10.1  | 0.0      | 0         |     |       |       |
|                   | K.RPSGVPDR.F     | 883.47 | 2 | 0.1 | 2.914 | 0.384    | 612.6     | 1   | 14/21 | 8     |

---

1 of 1 peptide matches reported, 0 removed due to filtering



DTA for scan: 0  
Precursor ion: 442.24  
Mass type: mono  
Mod's: (M\* +15.99492) C=161.01468

Ion series for charge: +1

| AA | A ions        | B ions        | B* ions | Bo ions | C ions | Y ions        | Y* ions | Yo ions | Z ions |
|----|---------------|---------------|---------|---------|--------|---------------|---------|---------|--------|
| R  | 129.11        | <b>157.11</b> |         |         |        |               |         |         |        |
| P  | 226.17        | <b>254.16</b> |         |         |        | <b>727.37</b> |         |         |        |
| S  | 313.20        | 341.19        |         |         |        | <b>630.32</b> |         |         |        |
| G  | <b>370.22</b> | 398.21        |         |         |        | <b>543.29</b> |         |         |        |
| V  | <b>469.29</b> | <b>497.28</b> |         |         |        | 486.27        |         |         |        |
| P  | 566.34        | <b>594.34</b> |         |         |        | <b>387.20</b> |         |         |        |
| D  | 681.37        | <b>709.36</b> |         |         |        | 290.15        |         |         |        |
| R  |               |               |         |         |        | <b>175.12</b> |         |         |        |



#0-0 NL: 6.35E5



---

| Reference         |                  |        |   | P   | Score | Coverage | Accession |     |       |       |
|-------------------|------------------|--------|---|-----|-------|----------|-----------|-----|-------|-------|
| Scan(s)           | Sequence         | MH+    | z | P   | XC    | DeltaCn  | Sp        | RSp | Ions  | Count |
| IPI:IPI00827815.1 | TREMBL:A2NYV4 Ta |        |   | 1   | 10.1  | 0.0      | 0         |     |       |       |
|                   | K.RPSGVPDR.F     | 883.47 | 2 | 0.1 | 2.914 | 0.384    | 612.6     | 1   | 14/21 | 8     |

1 of 1 peptide matches reported, 0 removed due to filtering

DTA for scan: 0  
Precursor ion: 442.24  
Mass type: mono  
Mod's: (M\* +15.99492) C=161.01468

Ion series for charge: +1

| AA | A ions        | B ions        | B* ions | Bo ions | C ions | Y ions        | Y* ions | Yo ions | Z ions |
|----|---------------|---------------|---------|---------|--------|---------------|---------|---------|--------|
| R  | 129.11        | <b>157.11</b> |         |         |        |               |         |         |        |
| P  | 226.17        | <b>254.16</b> |         |         |        | <b>727.37</b> |         |         |        |
| S  | 313.20        | 341.19        |         |         |        | <b>630.32</b> |         |         |        |
| G  | <b>370.22</b> | 398.21        |         |         |        | <b>543.29</b> |         |         |        |
| V  | <b>469.29</b> | <b>497.28</b> |         |         |        | 486.27        |         |         |        |
| P  | 566.34        | <b>594.34</b> |         |         |        | <b>387.20</b> |         |         |        |
| D  | 681.37        | <b>709.36</b> |         |         |        | 290.15        |         |         |        |
| R  |               |               |         |         |        | <b>175.12</b> |         |         |        |

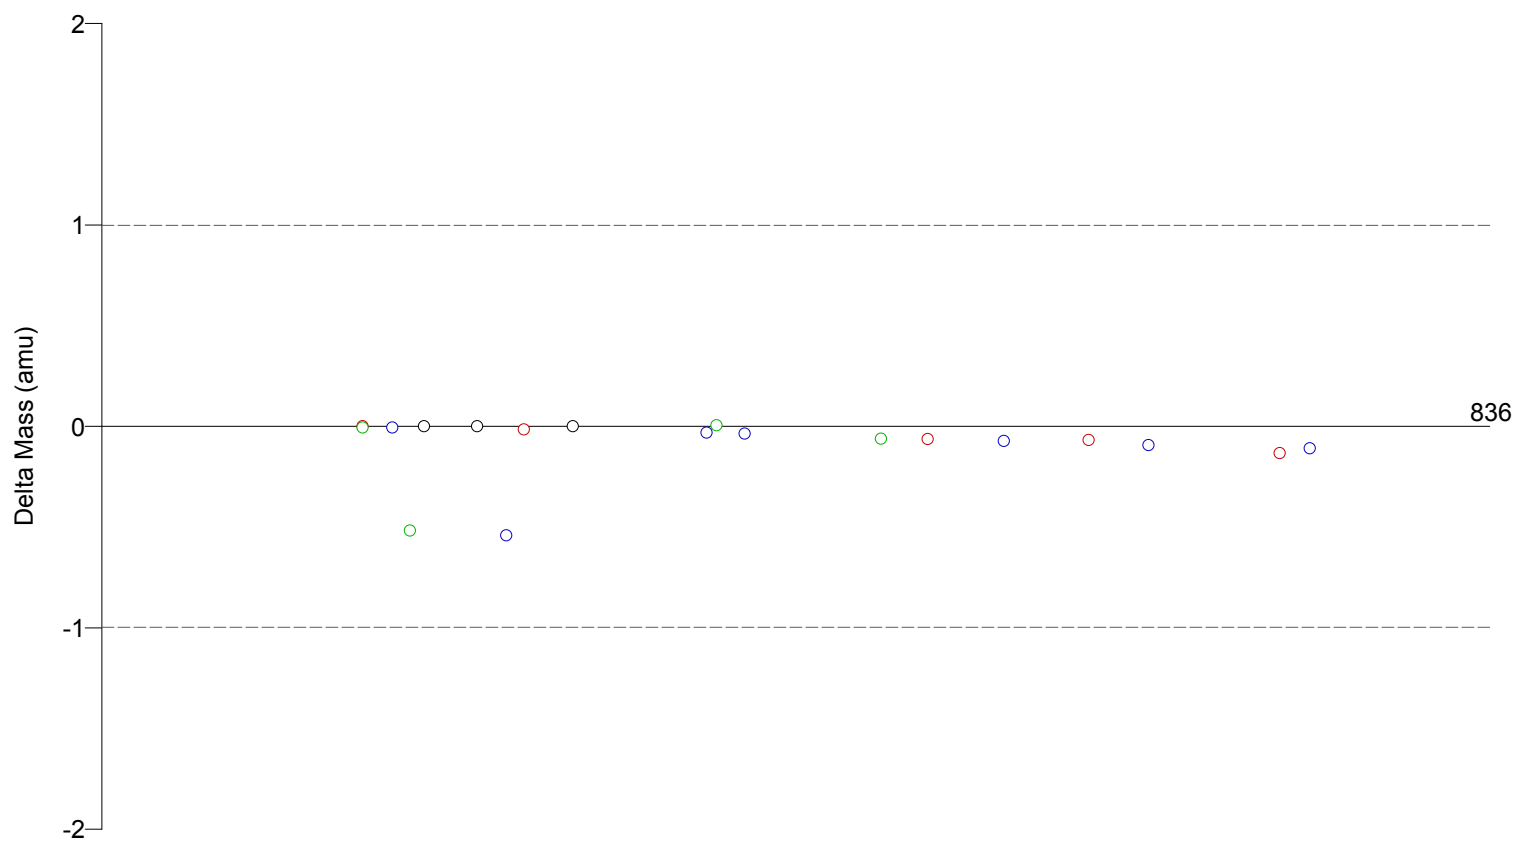

#0-0 NL: 6.35E5



---

| Reference         |                  |        |   | P   | Score | Coverage | Accession |     |       |       |
|-------------------|------------------|--------|---|-----|-------|----------|-----------|-----|-------|-------|
| Scan(s)           | Sequence         | MH+    | z | P   | XC    | DeltaCn  | Sp        | RSp | Ions  | Count |
| IPI:IPI00828048.1 | TREMBL:A2KUC4 Ta |        |   | 1   | 10.1  | 0.0      | 0         |     |       |       |
|                   | K.RPSGVPDR.F     | 883.47 | 2 | 0.1 | 2.914 | 0.384    | 612.6     | 1   | 14/21 | 8     |

1 of 1 peptide matches reported, 0 removed due to filtering

DTA for scan: 0  
Precursor ion: 442.24  
Mass type: mono  
Mod's: (M\* +15.99492) C=161.01468

Ion series for charge: +1

| AA | A ions        | B ions        | B* ions | Bo ions | C ions | Y ions        | Y* ions | Yo ions | Z ions |
|----|---------------|---------------|---------|---------|--------|---------------|---------|---------|--------|
| R  | 129.11        | <b>157.11</b> |         |         |        |               |         |         |        |
| P  | 226.17        | <b>254.16</b> |         |         |        | <b>727.37</b> |         |         |        |
| S  | 313.20        | 341.19        |         |         |        | <b>630.32</b> |         |         |        |
| G  | <b>370.22</b> | 398.21        |         |         |        | <b>543.29</b> |         |         |        |
| V  | <b>469.29</b> | <b>497.28</b> |         |         |        | 486.27        |         |         |        |
| P  | 566.34        | <b>594.34</b> |         |         |        | <b>387.20</b> |         |         |        |
| D  | 681.37        | <b>709.36</b> |         |         |        | 290.15        |         |         |        |
| R  |               |               |         |         |        | <b>175.12</b> |         |         |        |



#0-0 NL: 6.35E5





---

| Reference         |                  |        |   | P   | Score | Coverage | Accession |     |       |       |
|-------------------|------------------|--------|---|-----|-------|----------|-----------|-----|-------|-------|
| Scan(s)           | Sequence         | MH+    | z | P   | XC    | DeltaCn  | Sp        | RSp | Ions  | Count |
| IPI:IPI00828149.1 | TREMBL:A2NYQ8 Ta |        |   | 1   | 10.1  | 0.0      | 0         |     |       |       |
|                   | K.RPSGVPDR.F     | 883.47 | 2 | 0.1 | 2.914 | 0.384    | 612.6     | 1   | 14/21 | 8     |

1 of 1 peptide matches reported, 0 removed due to filtering

DTA for scan: 0  
Precursor ion: 442.24  
Mass type: mono  
Mod's: (M\* +15.99492) C=161.01468

Ion series for charge: +1

| AA | A ions        | B ions        | B* ions | Bo ions | C ions | Y ions        | Y* ions | Yo ions | Z ions |
|----|---------------|---------------|---------|---------|--------|---------------|---------|---------|--------|
| R  | 129.11        | <b>157.11</b> |         |         |        |               |         |         |        |
| P  | 226.17        | <b>254.16</b> |         |         |        | <b>727.37</b> |         |         |        |
| S  | 313.20        | 341.19        |         |         |        | <b>630.32</b> |         |         |        |
| G  | <b>370.22</b> | 398.21        |         |         |        | <b>543.29</b> |         |         |        |
| V  | <b>469.29</b> | <b>497.28</b> |         |         |        | 486.27        |         |         |        |
| P  | 566.34        | <b>594.34</b> |         |         |        | <b>387.20</b> |         |         |        |
| D  | 681.37        | <b>709.36</b> |         |         |        | 290.15        |         |         |        |
| R  |               |               |         |         |        | <b>175.12</b> |         |         |        |



#0-0 NL: 6.35E5

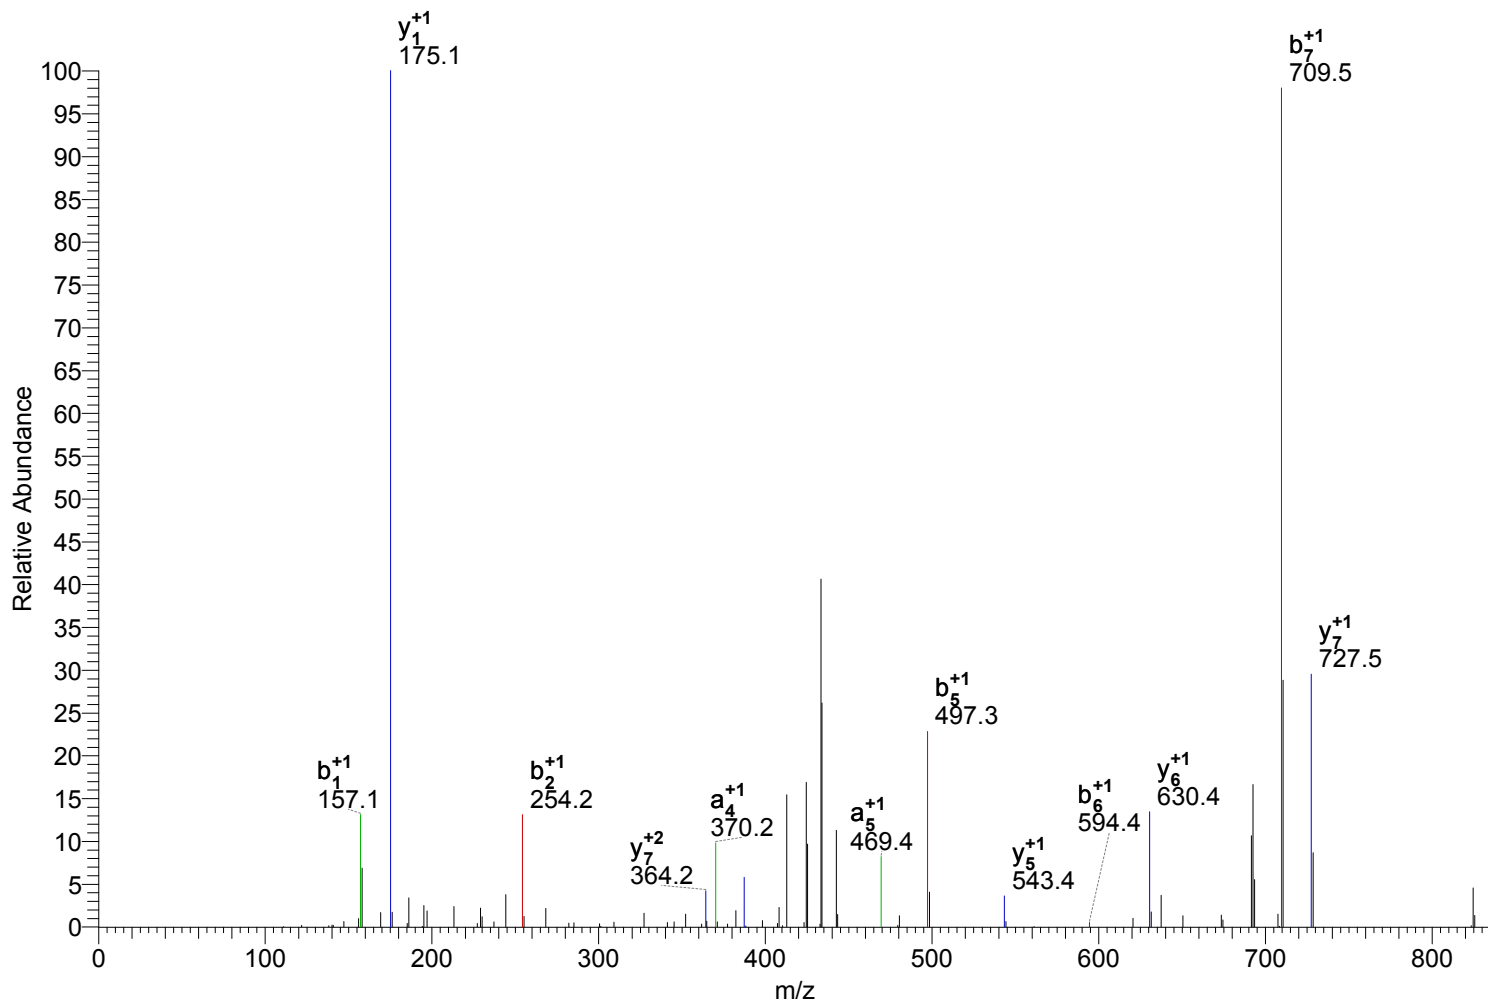

---

| Reference                                                      |          |         |   | P   | Score | Coverage | Accession |     |       |       |
|----------------------------------------------------------------|----------|---------|---|-----|-------|----------|-----------|-----|-------|-------|
| Scan(s)                                                        | Sequence | MH+     | z | P   | XC    | DeltaCn  | Sp        | RSp | Ions  | Count |
| IPI:IPI00890754.1 TREMBL:B1N7B6 Tax_Id=9606 Gene_Symbol=- Cryo |          |         |   | 1   | 10.1  | 0.0      |           | 0   |       |       |
| 19287468 - 1 K.NTVYLQM*NSLR.A                                  |          | 1354.68 | 2 | 0.1 | 2.168 | 0.000    | 607.2     | 1   | 14/30 |       |

---

1 of 1 peptide matches reported, 0 removed due to filtering

DTA for scans: 19287468-1  
Precursor ion: 677.84  
Mass type: mono  
Mod's: (M\* +15.99492) C=161.01468

Ion series for charge: +1

| AA | A ions         | B ions        | B* ions | Bo ions | C ions | Y ions         | Y* ions | Yo ions | Z ions |
|----|----------------|---------------|---------|---------|--------|----------------|---------|---------|--------|
| N  | 87.06          | 115.05        |         |         |        |                |         |         |        |
| T  | 188.10         | 216.10        |         |         |        | 1240.64        |         |         |        |
| V  | 287.17         | <b>315.17</b> |         |         |        | 1139.59        |         |         |        |
| Y  | 450.23         | <b>478.23</b> |         |         |        | <b>1040.52</b> |         |         |        |
| L  | <b>563.32</b>  | <b>591.31</b> |         |         |        | <b>877.46</b>  |         |         |        |
| Q  | 691.38         | 719.37        |         |         |        | <b>764.37</b>  |         |         |        |
| M* | 838.41         | 866.41        |         |         |        | <b>636.31</b>  |         |         |        |
| N  | 952.46         | <b>980.45</b> |         |         |        | <b>489.28</b>  |         |         |        |
| S  | <b>1039.49</b> | 1067.48       |         |         |        | <b>375.24</b>  |         |         |        |
| L  | 1152.57        | 1180.57       |         |         |        | <b>288.20</b>  |         |         |        |
| R  |                |               |         |         |        | 175.12         |         |         |        |

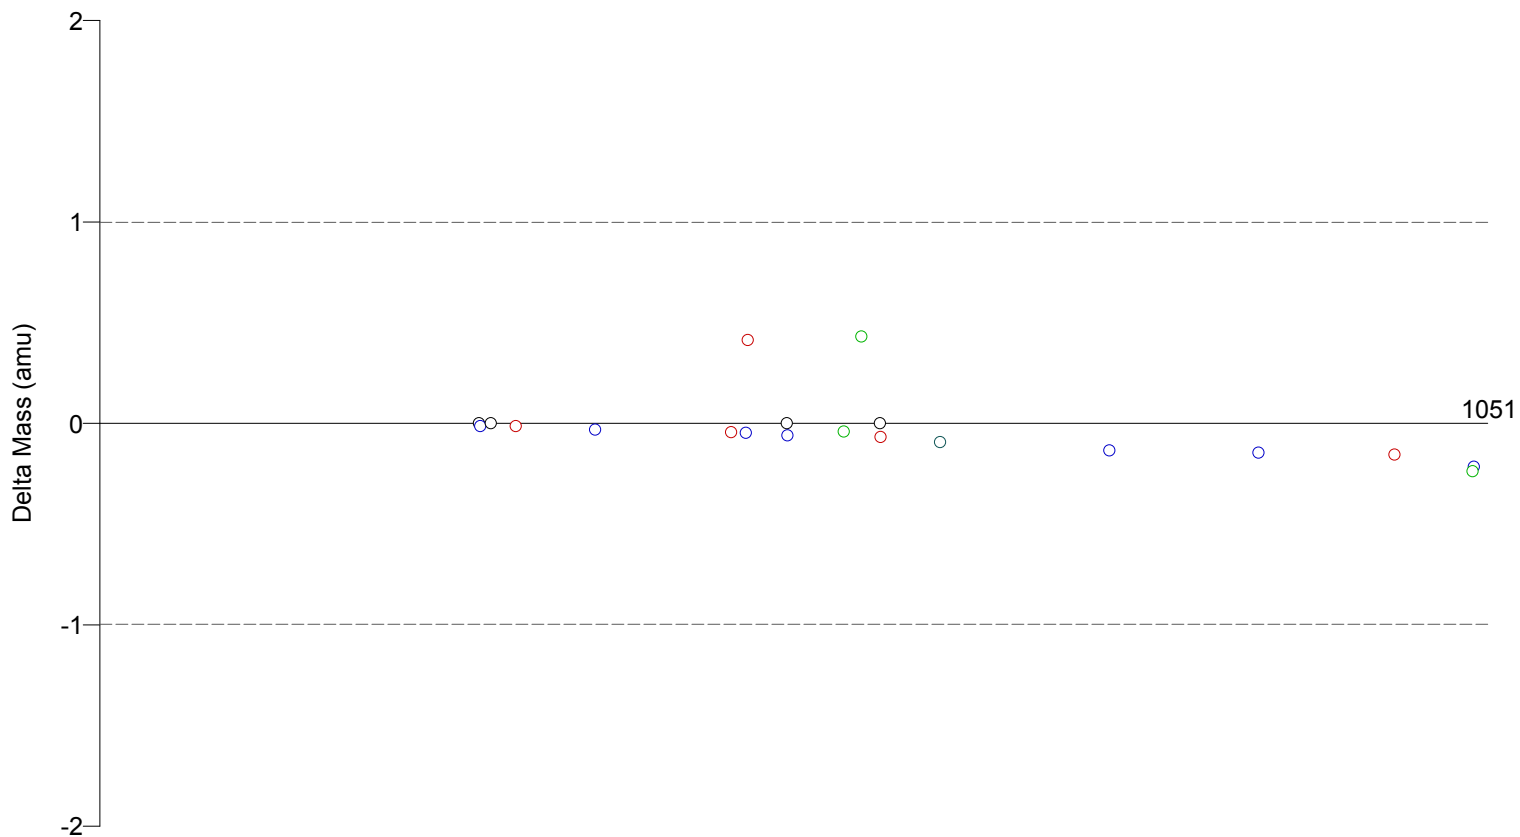

#19287468-1 NL: 8.93E4

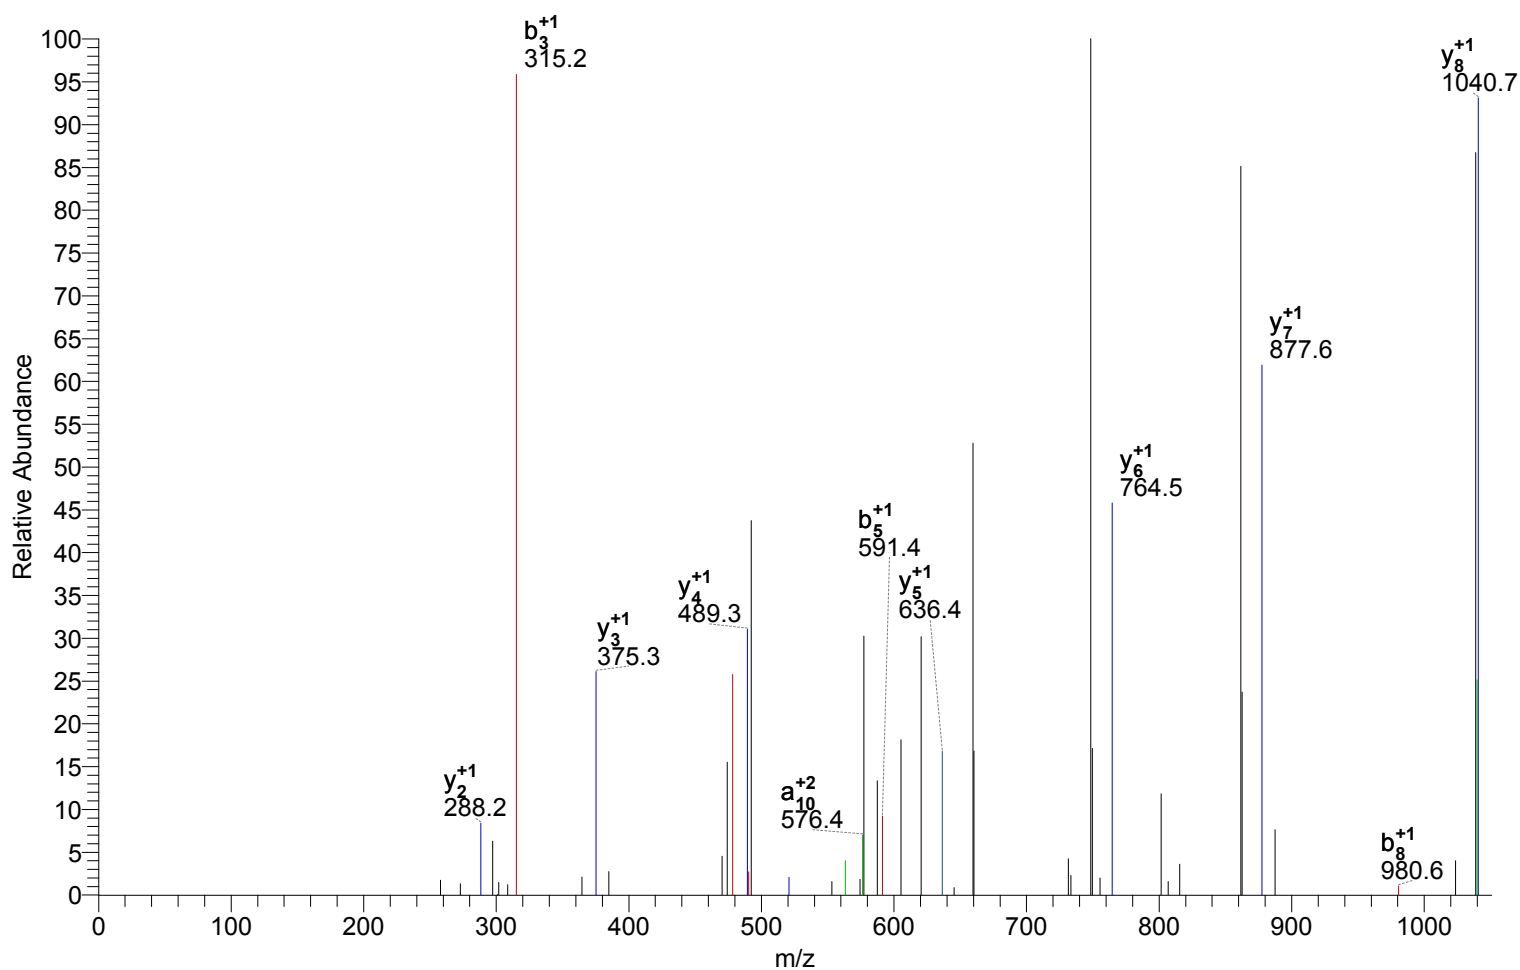

---

| Reference                                                      |                 |         |   | P | Score | Coverage | Accession |     |       |       |
|----------------------------------------------------------------|-----------------|---------|---|---|-------|----------|-----------|-----|-------|-------|
| Scan(s)                                                        | Sequence        | MH+     | z | P | XC    | DeltaCn  | Sp        | RSp | Ions  | Count |
| IPI:IPI00022438.1 SWISS-PROT:O75444-1 TREMBL:Q8IX32 ENSEMBL:EN |                 |         |   | 1 | 8.1   | 0.0      | 0         |     |       |       |
| 19287468 - 1                                                   | R.VQQRHVLESEK.N | 1352.73 | 2 | 1 | 1.436 | 0.647    | 201.9     | 2   | 10/30 | 1     |

---

1 of 1 peptide matches reported, 0 removed due to filtering

DTA for scans: 19287468-1  
Precursor ion: 676.85  
Mass type: mono  
Mod's: (M\* +15.99492) C=161.01468

Ion series for charge: +1

| AA | A ions         | B ions        | B* ions | Bo ions | C ions | Y ions        | Y* ions | Yo ions | Z ions |
|----|----------------|---------------|---------|---------|--------|---------------|---------|---------|--------|
| V  | 72.08          | 100.08        |         |         |        |               |         |         |        |
| Q  | <b>200.14</b>  | 228.13        |         |         |        | 1253.66       |         |         |        |
| Q  | <b>328.20</b>  | 356.19        |         |         |        | 1125.60       |         |         |        |
| R  | 484.30         | 512.29        |         |         |        | 997.54        |         |         |        |
| H  | <b>621.36</b>  | 649.35        |         |         |        | 841.44        |         |         |        |
| V  | 720.43         | <b>748.42</b> |         |         |        | 704.38        |         |         |        |
| L  | 833.51         | <b>861.51</b> |         |         |        | <b>605.31</b> |         |         |        |
| E  | <b>962.55</b>  | 990.55        |         |         |        | <b>492.23</b> |         |         |        |
| S  | 1049.59        | 1077.58       |         |         |        | 363.19        |         |         |        |
| E  | <b>1178.63</b> | 1206.62       |         |         |        | <b>276.16</b> |         |         |        |
| K  |                |               |         |         |        | 147.11        |         |         |        |



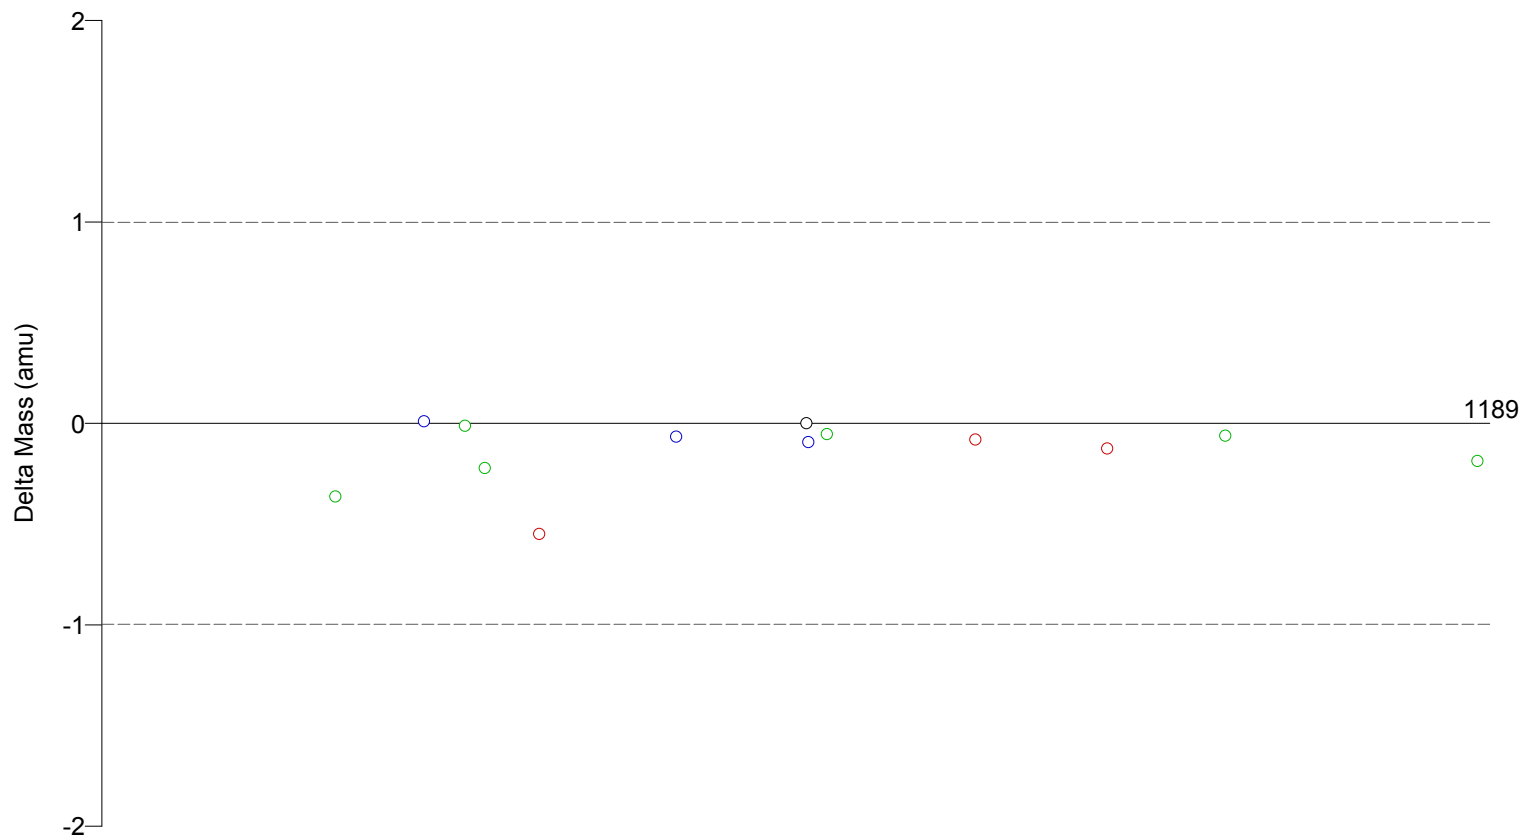

#19287468-1 NL: 1.01E5

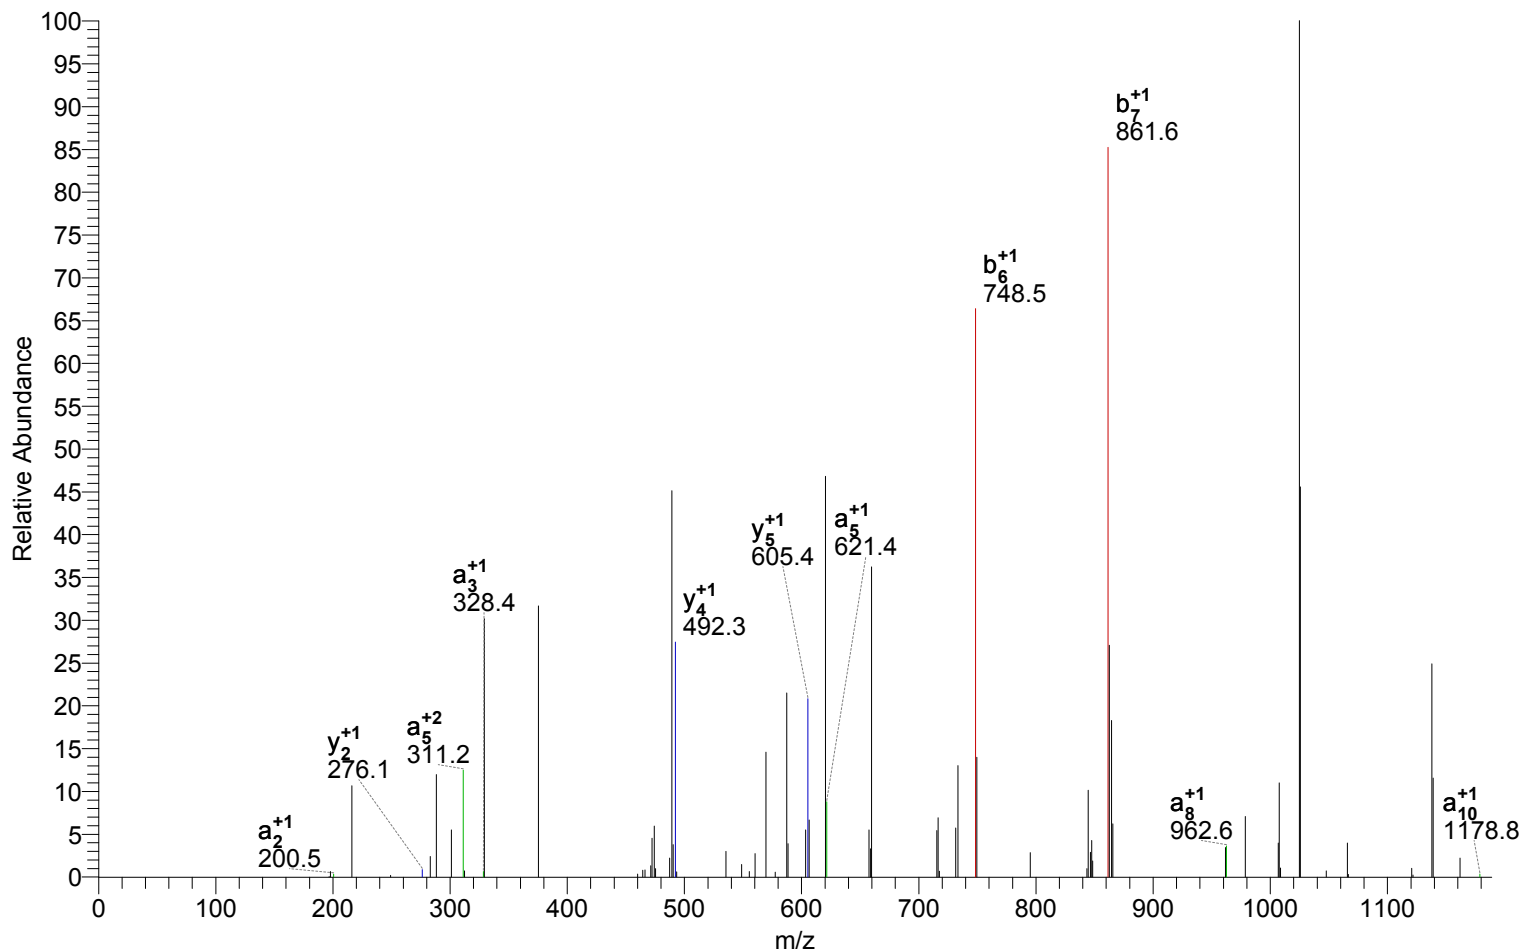

---

| Reference                          |                 |         |   | P | Score | Coverage | Accession |     |       |       |
|------------------------------------|-----------------|---------|---|---|-------|----------|-----------|-----|-------|-------|
| Scan(s)                            | Sequence        | MH+     | z | P | XC    | DeltaCn  | Sp        | RSp | Ions  | Count |
| IPI:IPI00219060.1 SWISS-PROT:O7544 |                 |         |   | 1 | 8.1   | 0.0      | 0         |     |       |       |
| 19287468 - 1                       | R.VQQRHVLESEK.N | 1352.73 | 2 | 1 | 1.436 | 0.647    | 201.9     | 2   | 10/30 | 1     |

---

1 of 1 peptide matches reported, 0 removed due to filtering

DTA for scans: 19287468-1  
Precursor ion: 676.85  
Mass type: mono  
Mod's: (M\* +15.99492) C=161.01468

Ion series for charge: +1

| AA | A ions         | B ions        | B* ions | Bo ions | C ions | Y ions        | Y* ions | Yo ions | Z ions |
|----|----------------|---------------|---------|---------|--------|---------------|---------|---------|--------|
| V  | 72.08          | 100.08        |         |         |        |               |         |         |        |
| Q  | <b>200.14</b>  | 228.13        |         |         |        | 1253.66       |         |         |        |
| Q  | <b>328.20</b>  | 356.19        |         |         |        | 1125.60       |         |         |        |
| R  | 484.30         | 512.29        |         |         |        | 997.54        |         |         |        |
| H  | <b>621.36</b>  | 649.35        |         |         |        | 841.44        |         |         |        |
| V  | 720.43         | <b>748.42</b> |         |         |        | 704.38        |         |         |        |
| L  | 833.51         | <b>861.51</b> |         |         |        | <b>605.31</b> |         |         |        |
| E  | <b>962.55</b>  | 990.55        |         |         |        | <b>492.23</b> |         |         |        |
| S  | 1049.59        | 1077.58       |         |         |        | 363.19        |         |         |        |
| E  | <b>1178.63</b> | 1206.62       |         |         |        | <b>276.16</b> |         |         |        |
| K  |                |               |         |         |        | 147.11        |         |         |        |

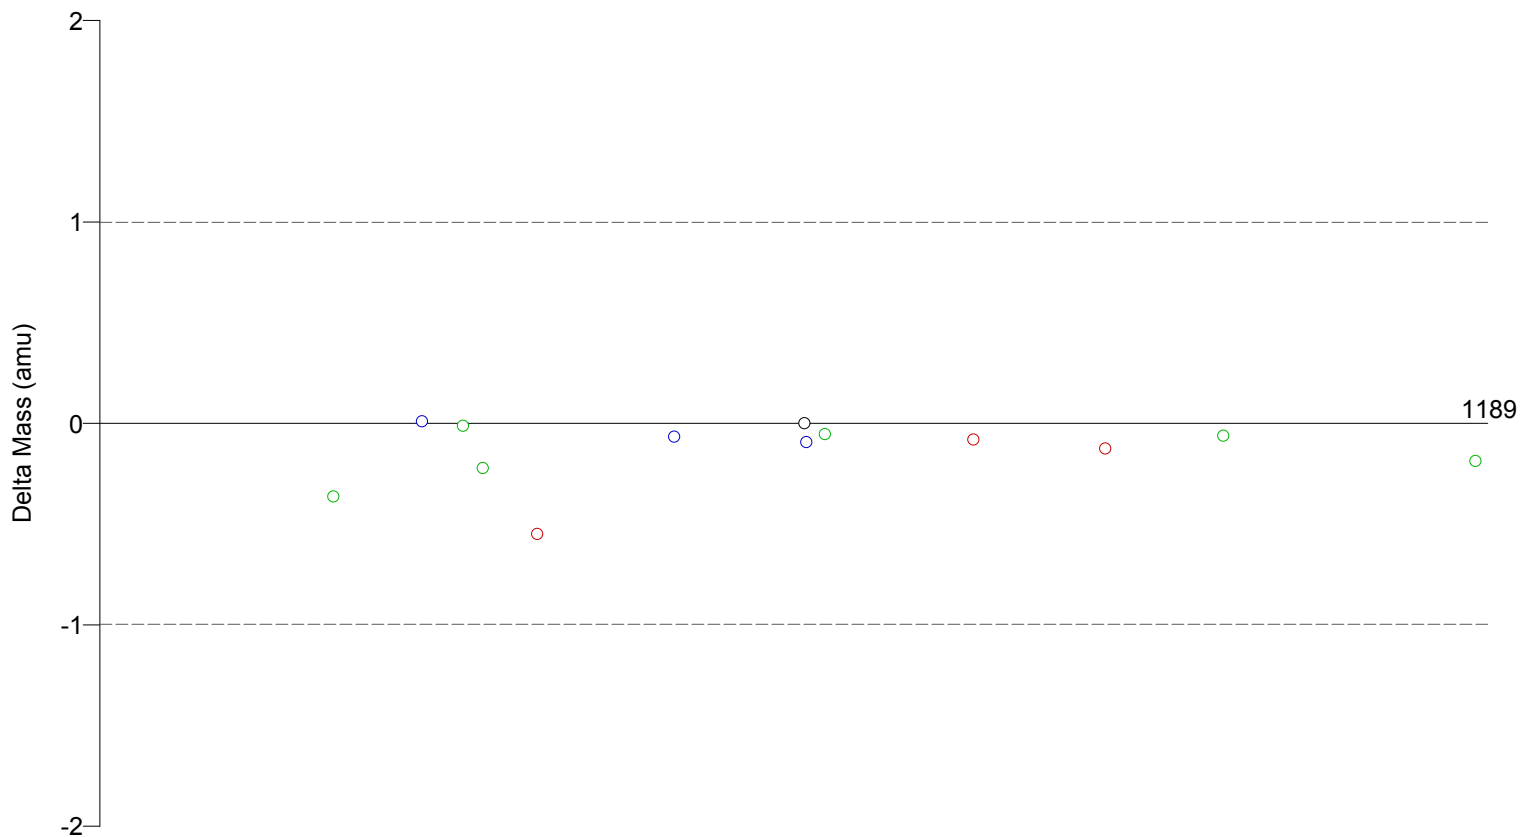

#19287468-1 NL: 1.01E5

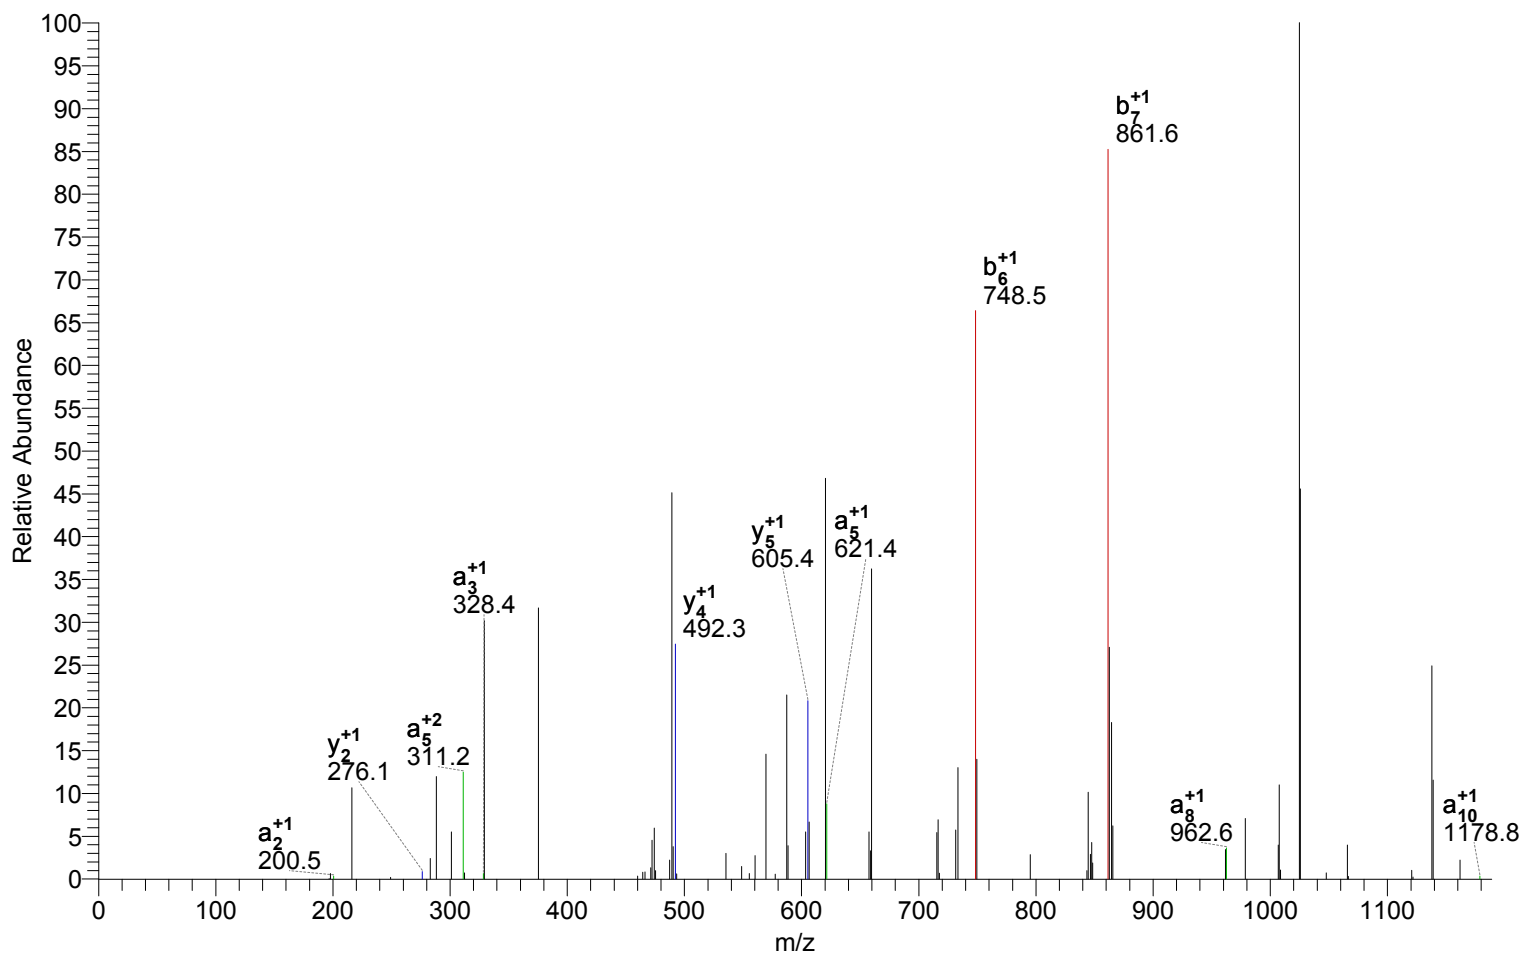

---

| Reference                                                      |                         |         |   | P   | Score | Coverage | Accession |     |        |       |
|----------------------------------------------------------------|-------------------------|---------|---|-----|-------|----------|-----------|-----|--------|-------|
| Scan(s)                                                        | Sequence                | MH+     | z | P   | XC    | DeltaCn  | Sp        | RSp | Ions   | Count |
| IPI:IPI00445079.1 TREMBL:Q6ZTG6 REFSEQ:XP_001714376;XP_0017207 |                         |         |   | 1   | 8.1   | 0.0      | 0         |     |        |       |
| 19287468 - 1                                                   | R.LYLNAHVVPQPPQSSRPRP.- | 2085.14 | 3 | 0.1 | 1.550 | 0.564    | 118.3     | 8   | 13/108 | 1     |

---

1 of 1 peptide matches reported, 0 removed due to filtering

DTA for scans: 19287468-1  
Precursor ion: 695.73  
Mass type: mono  
Mod's: (M\* +15.99492) C=161.01468

Ion series for charge: +1

| AA | A ions        | B ions        | B* ions | Bo ions | C ions | Y ions         | Y* ions | Yo ions | Z ions |
|----|---------------|---------------|---------|---------|--------|----------------|---------|---------|--------|
| L  | 86.10         | 114.09        |         |         |        |                |         |         |        |
| Y  | 249.16        | 277.15        |         |         |        | 1972.05        |         |         |        |
| L  | <b>362.24</b> | 390.24        |         |         |        | 1808.99        |         |         |        |
| N  | 476.29        | 504.28        |         |         |        | 1695.90        |         |         |        |
| A  | <b>547.32</b> | <b>575.32</b> |         |         |        | 1581.86        |         |         |        |
| H  | 684.38        | <b>712.38</b> |         |         |        | 1510.82        |         |         |        |
| V  | 783.45        | <b>811.45</b> |         |         |        | 1373.76        |         |         |        |
| V  | <b>882.52</b> | <b>910.51</b> |         |         |        | 1274.70        |         |         |        |
| P  | 979.57        | 1007.57       |         |         |        | <b>1175.63</b> |         |         |        |
| G  | 1036.59       | 1064.59       |         |         |        | 1078.58        |         |         |        |
| P  | 1133.65       | 1161.64       |         |         |        | 1021.55        |         |         |        |
| P  | 1230.70       | 1258.69       |         |         |        | 924.50         |         |         |        |
| Q  | 1358.76       | 1386.75       |         |         |        | 827.45         |         |         |        |
| S  | 1445.79       | 1473.78       |         |         |        | 699.39         |         |         |        |
| S  | 1532.82       | 1560.82       |         |         |        | 612.36         |         |         |        |
| R  | 1688.92       | 1716.92       |         |         |        | 525.33         |         |         |        |
| P  | 1785.98       | 1813.97       |         |         |        | 369.22         |         |         |        |
| R  | 1942.08       | 1970.07       |         |         |        | 272.17         |         |         |        |
| P  |               |               |         |         |        | 116.07         |         |         |        |

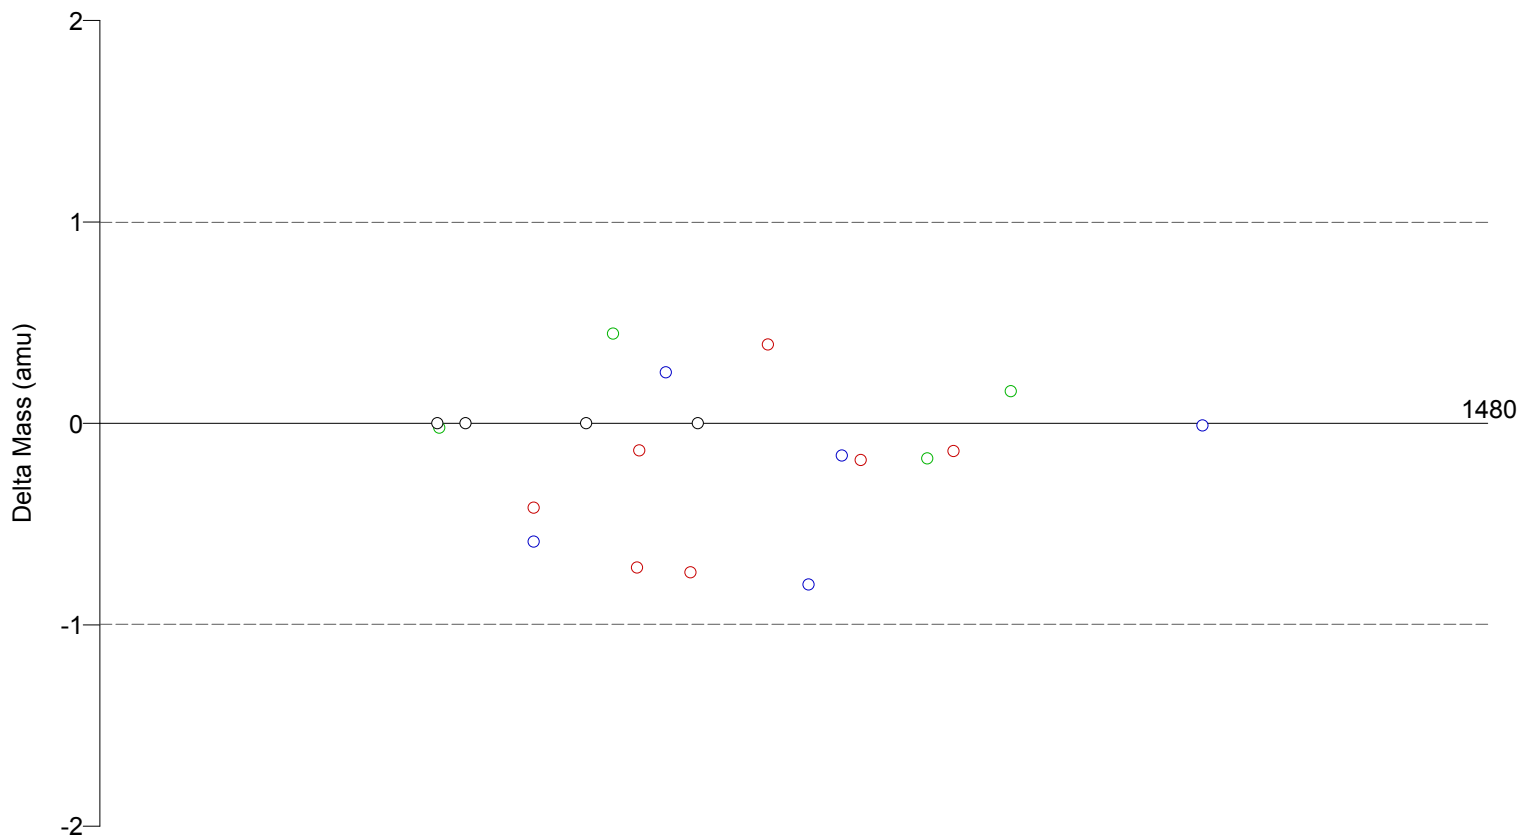

#19287468-1 NL: 5.80E4

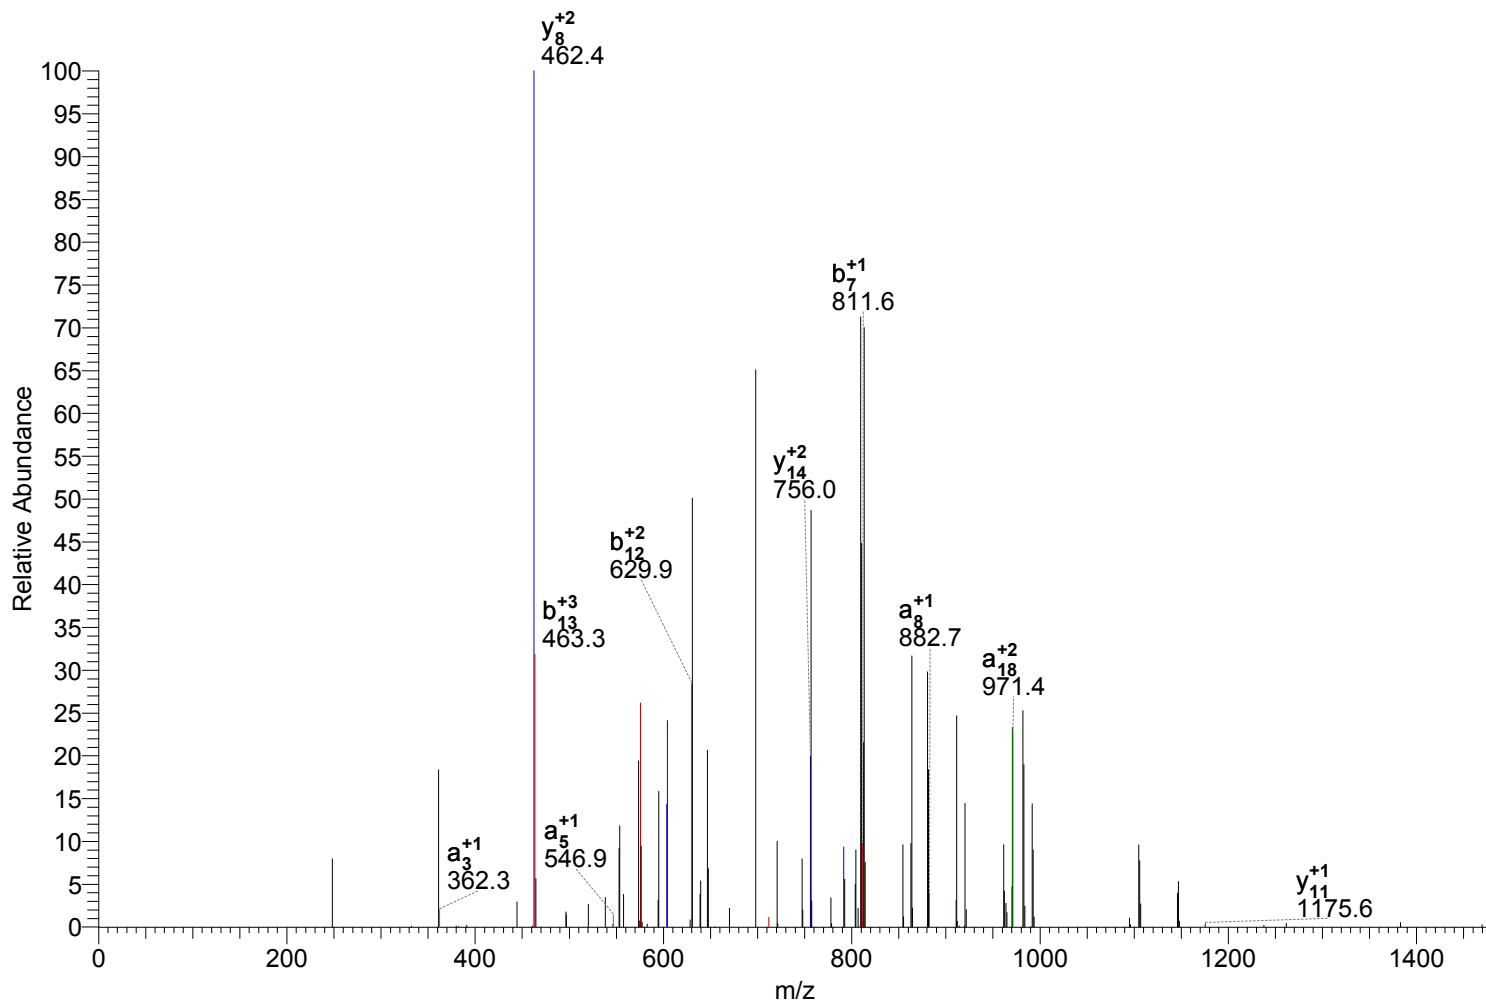

---

| Reference                          |                                               |         |   | P   | Score | Coverage | Accession |     |        |       |
|------------------------------------|-----------------------------------------------|---------|---|-----|-------|----------|-----------|-----|--------|-------|
| Scan(s)                            | Sequence                                      | MH+     | z | P   | XC    | DeltaCn  | Sp        | RSp | Ions   | Count |
| IPI:IPI00935923.1 REFSEQ:XP_002342 |                                               |         |   | 1   | 8.1   | 0.0      | 0         |     |        |       |
| 19287468 - 1                       | R.LYLNAHVVP $\overline{\text{G}}$ PFQSSRPRP.- | 2085.14 | 3 | 0.1 | 1.550 | 0.564    | 118.3     | 8   | 13/108 | 1     |

---

1 of 1 peptide matches reported, 0 removed due to filtering



DTA for scans: 19287468-1  
Precursor ion: 695.73  
Mass type: mono  
Mod's: (M\* +15.99492) C=161.01468

Ion series for charge: +1

| AA | A ions        | B ions        | B* ions | Bo ions | C ions | Y ions         | Y* ions | Yo ions | Z ions |
|----|---------------|---------------|---------|---------|--------|----------------|---------|---------|--------|
| L  | 86.10         | 114.09        |         |         |        |                |         |         |        |
| Y  | 249.16        | 277.15        |         |         |        | 1972.05        |         |         |        |
| L  | <b>362.24</b> | 390.24        |         |         |        | 1808.99        |         |         |        |
| N  | 476.29        | 504.28        |         |         |        | 1695.90        |         |         |        |
| A  | <b>547.32</b> | <b>575.32</b> |         |         |        | 1581.86        |         |         |        |
| H  | 684.38        | <b>712.38</b> |         |         |        | 1510.82        |         |         |        |
| V  | 783.45        | <b>811.45</b> |         |         |        | 1373.76        |         |         |        |
| V  | <b>882.52</b> | <b>910.51</b> |         |         |        | 1274.70        |         |         |        |
| P  | 979.57        | 1007.57       |         |         |        | <b>1175.63</b> |         |         |        |
| G  | 1036.59       | 1064.59       |         |         |        | 1078.58        |         |         |        |
| P  | 1133.65       | 1161.64       |         |         |        | 1021.55        |         |         |        |
| P  | 1230.70       | 1258.69       |         |         |        | 924.50         |         |         |        |
| Q  | 1358.76       | 1386.75       |         |         |        | 827.45         |         |         |        |
| S  | 1445.79       | 1473.78       |         |         |        | 699.39         |         |         |        |
| S  | 1532.82       | 1560.82       |         |         |        | 612.36         |         |         |        |
| R  | 1688.92       | 1716.92       |         |         |        | 525.33         |         |         |        |
| P  | 1785.98       | 1813.97       |         |         |        | 369.22         |         |         |        |
| R  | 1942.08       | 1970.07       |         |         |        | 272.17         |         |         |        |
| P  |               |               |         |         |        | 116.07         |         |         |        |



#19287468-1 NL: 5.80E4



---

| Reference                                                      |          |        |   | P | Score | Coverage | Accession |     |       |       |
|----------------------------------------------------------------|----------|--------|---|---|-------|----------|-----------|-----|-------|-------|
| Scan(s)                                                        | Sequence | MH+    | z | P | XC    | DeltaCn  | Sp        | RSp | Ions  | Count |
| IPI:IPI00418845.1 TREMBL:Q6ZS85 H-INV:HIT000047515 Tax_Id=9606 |          |        |   | 1 | 8.1   | 0.0      |           | 0   |       |       |
| 19287468 - 1 R.GPASRTPSR.A                                     |          | 928.50 | 2 | 1 | 1.431 | 0.467    | 166.7     | 10  | 10/24 |       |

---

1 of 1 peptide matches reported, 0 removed due to filtering

DTA for scans: 19287468-1  
Precursor ion: 464.76  
Mass type: mono  
Mod's: (M\* +15.99492) C=161.01468

Ion series for charge: +1

| AA | A ions        | B ions        | B* ions | Bo ions | C ions | Y ions        | Y* ions | Yo ions | Z ions |
|----|---------------|---------------|---------|---------|--------|---------------|---------|---------|--------|
| G  | 30.03         | 58.03         |         |         |        |               |         |         |        |
| P  | <b>127.09</b> | 155.08        |         |         |        | 871.47        |         |         |        |
| A  | 198.12        | 226.12        |         |         |        | 774.42        |         |         |        |
| S  | 285.16        | 313.15        |         |         |        | <b>703.38</b> |         |         |        |
| R  | 441.26        | 469.25        |         |         |        | <b>616.35</b> |         |         |        |
| T  | <b>542.30</b> | <b>570.30</b> |         |         |        | 460.25        |         |         |        |
| P  | <b>639.36</b> | 667.35        |         |         |        | <b>359.20</b> |         |         |        |
| S  | 726.39        | 754.38        |         |         |        | 262.15        |         |         |        |
| R  |               |               |         |         |        | <b>175.12</b> |         |         |        |

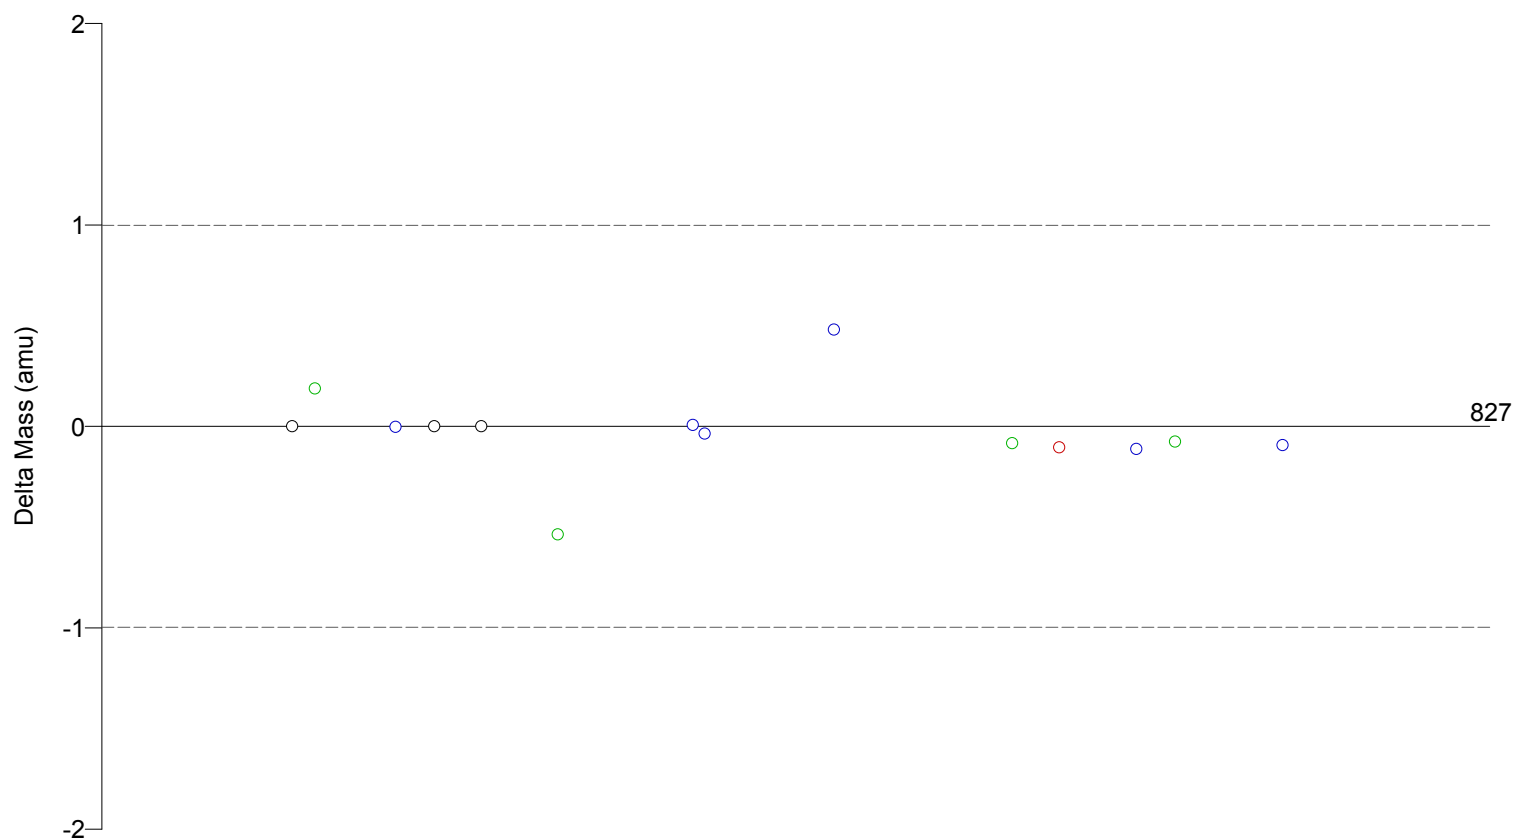

#19287468-1 NL: 1.36E6

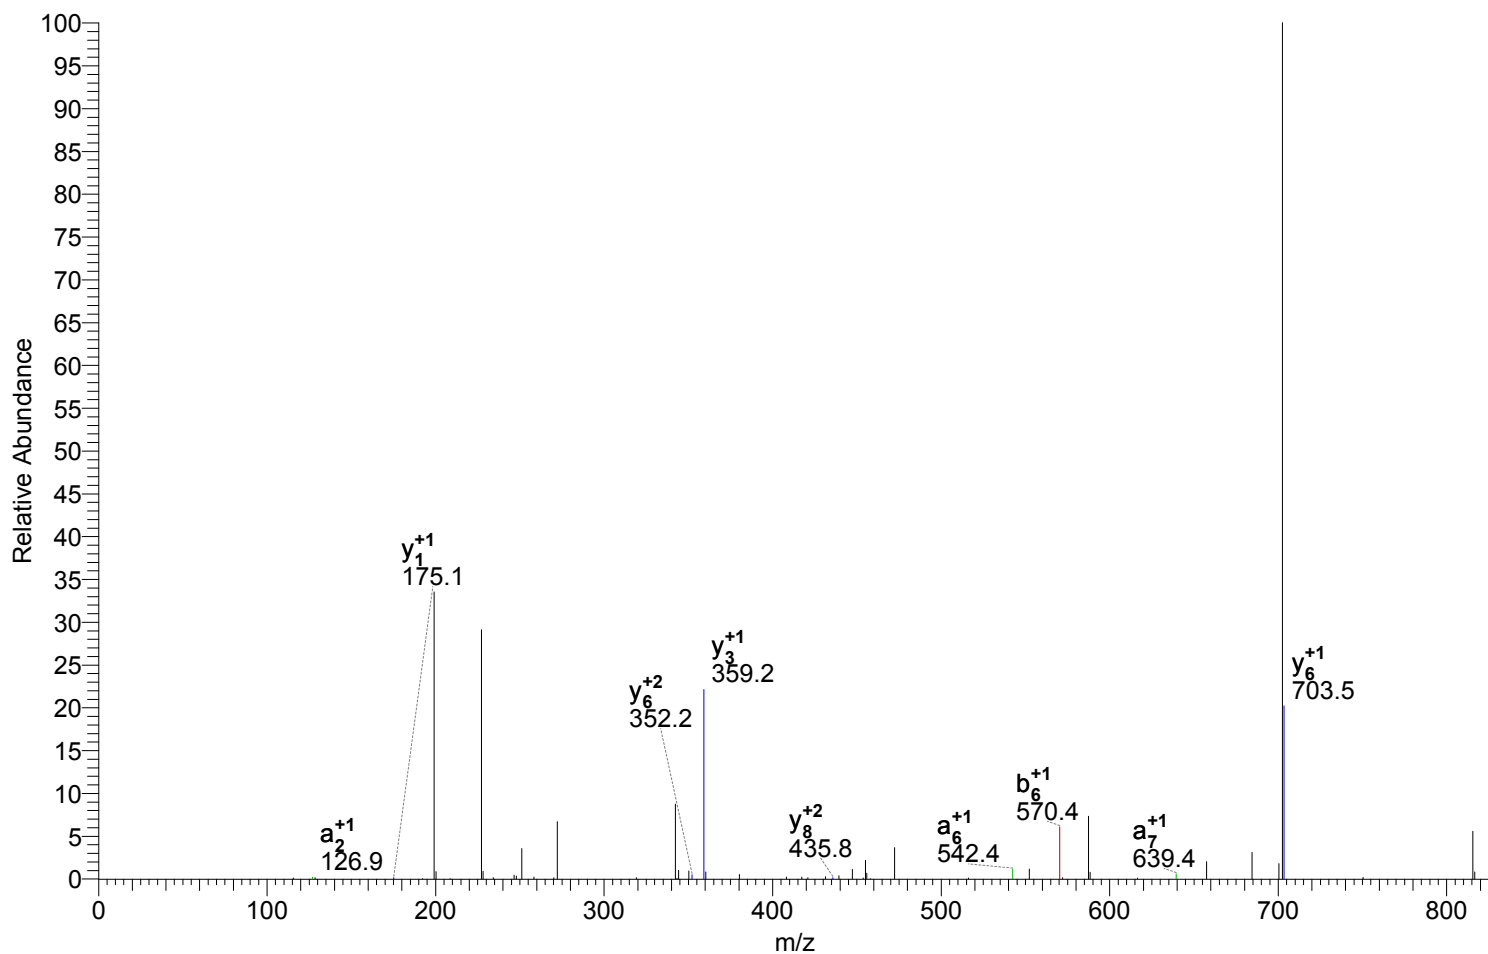

---

| Reference                                                      |          |         |   | P | Score | Coverage | Accession |     |      |       |
|----------------------------------------------------------------|----------|---------|---|---|-------|----------|-----------|-----|------|-------|
| Scan(s)                                                        | Sequence | MH+     | z | P | XC    | DeltaCn  | Sp        | RSp | Ions | Count |
| IPI:IPI00069817.2 SWISS-PROT:Q9UIG0-1 ENSEMBL:ENSP00000342434; |          |         |   | 1 | 8.1   | 0.0      | 0         |     |      |       |
| 2118291816 - R.WASMSEQRK.E                                     |          | 1251.58 | 2 | 1 | 1.301 | 0.654    | 32.9      | 10  | 7/27 | 1     |

---

1 of 1 peptide matches reported, 0 removed due to filtering

DTA for scans: 2118291816-26226248  
Precursor ion: 626.30  
Mass type: mono  
Mod's: (M\* +15.99492) C=161.01468

Ion series for charge: +1

| AA | A ions        | B ions        | B* ions | Bo ions | C ions | Y ions        | Y* ions | Yo ions | Z ions |
|----|---------------|---------------|---------|---------|--------|---------------|---------|---------|--------|
| W  | 159.09        | 187.09        |         |         |        |               |         |         |        |
| A  | 230.13        | <b>258.12</b> |         |         |        | 1065.50       |         |         |        |
| S  | 317.16        | <b>345.16</b> |         |         |        | <b>994.46</b> |         |         |        |
| M  | 448.20        | 476.20        |         |         |        | <b>907.43</b> |         |         |        |
| S  | 535.23        | 563.23        |         |         |        | 776.39        |         |         |        |
| E  | 664.28        | 692.27        |         |         |        | 689.36        |         |         |        |
| E  | <b>793.32</b> | 821.31        |         |         |        | 560.32        |         |         |        |
| Q  | 921.38        | 949.37        |         |         |        | 431.27        |         |         |        |
| R  | 1077.48       | 1105.47       |         |         |        | 303.21        |         |         |        |
| K  |               |               |         |         |        | 147.11        |         |         |        |

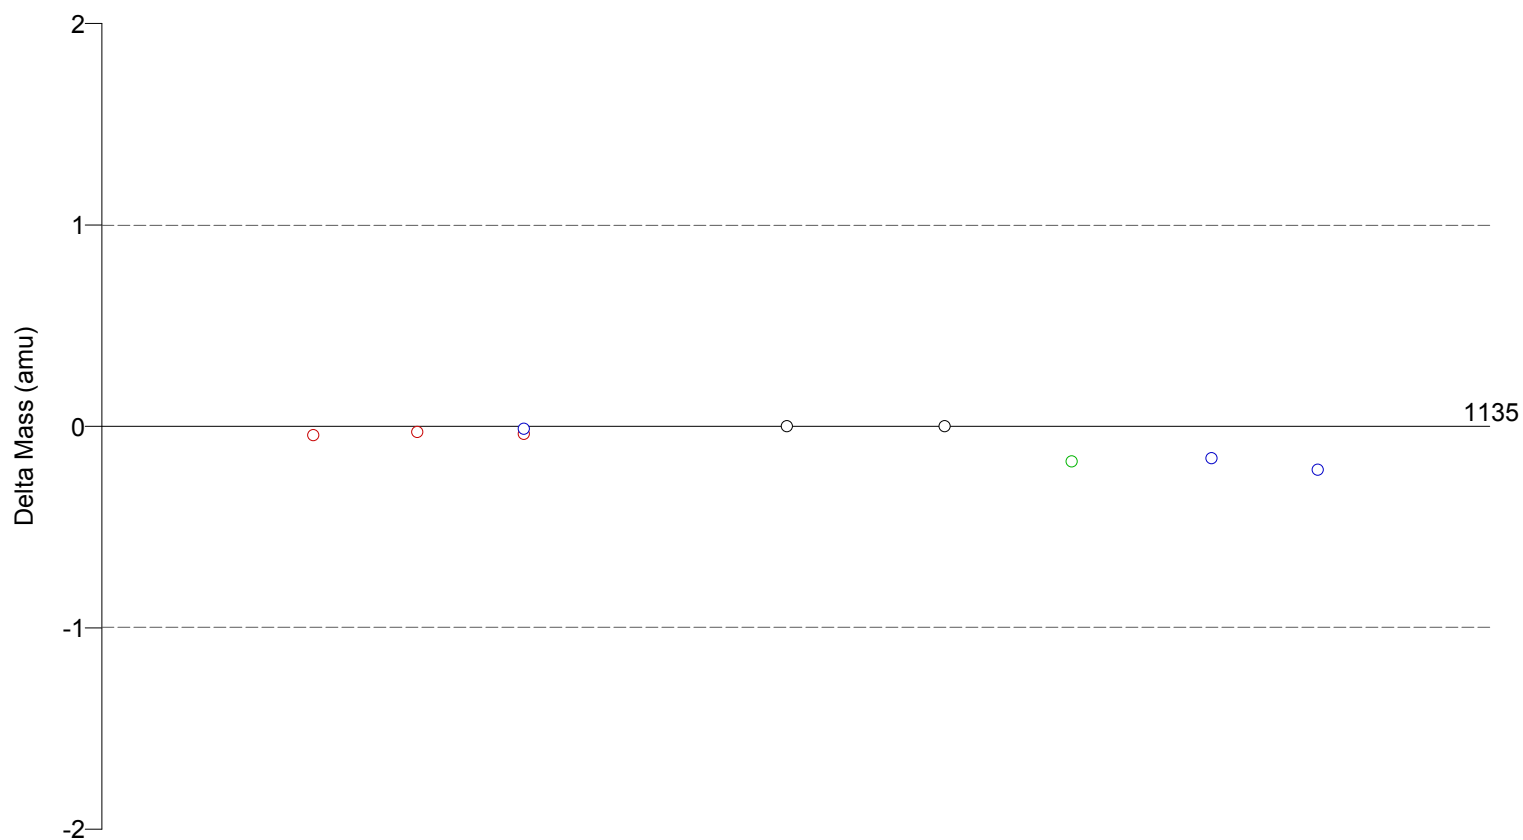

#2118291816-26226248 NL: 2.31E5

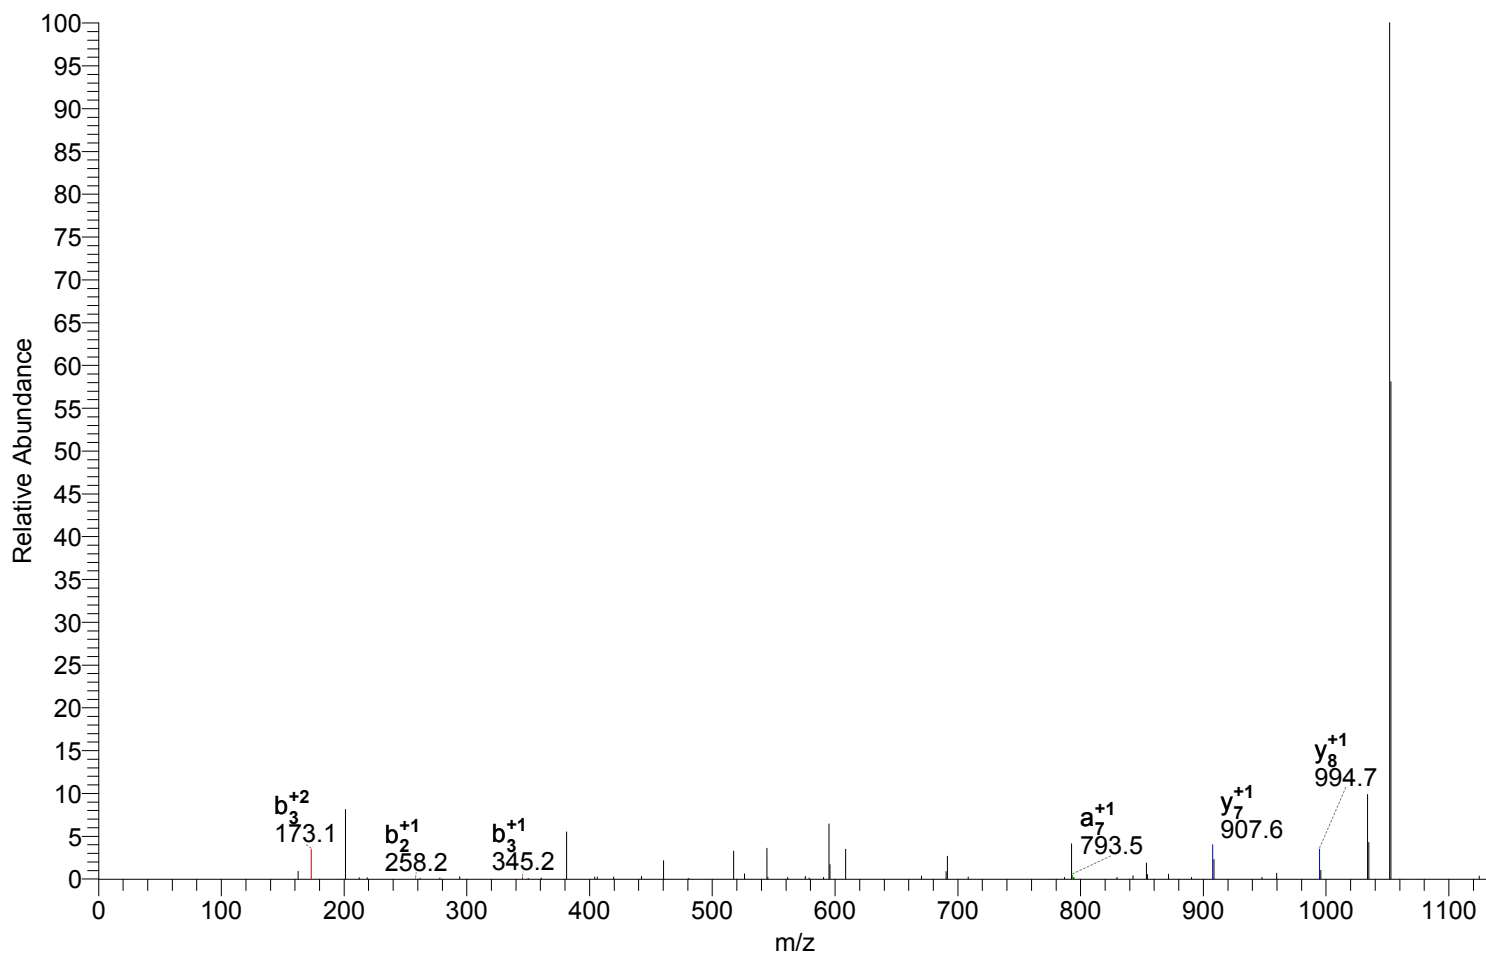



---

| Reference                          |          |         |   | P | Score | Coverage | Accession |     |      |       |
|------------------------------------|----------|---------|---|---|-------|----------|-----------|-----|------|-------|
| Scan(s)                            | Sequence | MH+     | z | P | XC    | DeltaCn  | Sp        | RSp | Ions | Count |
| IPI:IPI00216695.1 SWISS-PROT:Q9UIG |          |         |   | 1 | 8.1   | 0.0      | 0         |     |      |       |
| 2118291816 - R.WASMSEQRK.E         |          | 1251.58 | 2 | 1 | 1.301 | 0.654    | 32.9      | 10  | 7/27 | 1     |

---

1 of 1 peptide matches reported, 0 removed due to filtering

DTA for scans: 2118291816-26226248  
Precursor ion: 626.30  
Mass type: mono  
Mod's: (M\* +15.99492) C=161.01468

Ion series for charge: +1

| AA | A ions        | B ions        | B* ions | Bo ions | C ions | Y ions        | Y* ions | Yo ions | Z ions |
|----|---------------|---------------|---------|---------|--------|---------------|---------|---------|--------|
| W  | 159.09        | 187.09        |         |         |        |               |         |         |        |
| A  | 230.13        | <b>258.12</b> |         |         |        | 1065.50       |         |         |        |
| S  | 317.16        | <b>345.16</b> |         |         |        | <b>994.46</b> |         |         |        |
| M  | 448.20        | 476.20        |         |         |        | <b>907.43</b> |         |         |        |
| S  | 535.23        | 563.23        |         |         |        | 776.39        |         |         |        |
| E  | 664.28        | 692.27        |         |         |        | 689.36        |         |         |        |
| E  | <b>793.32</b> | 821.31        |         |         |        | 560.32        |         |         |        |
| Q  | 921.38        | 949.37        |         |         |        | 431.27        |         |         |        |
| R  | 1077.48       | 1105.47       |         |         |        | 303.21        |         |         |        |
| K  |               |               |         |         |        | 147.11        |         |         |        |

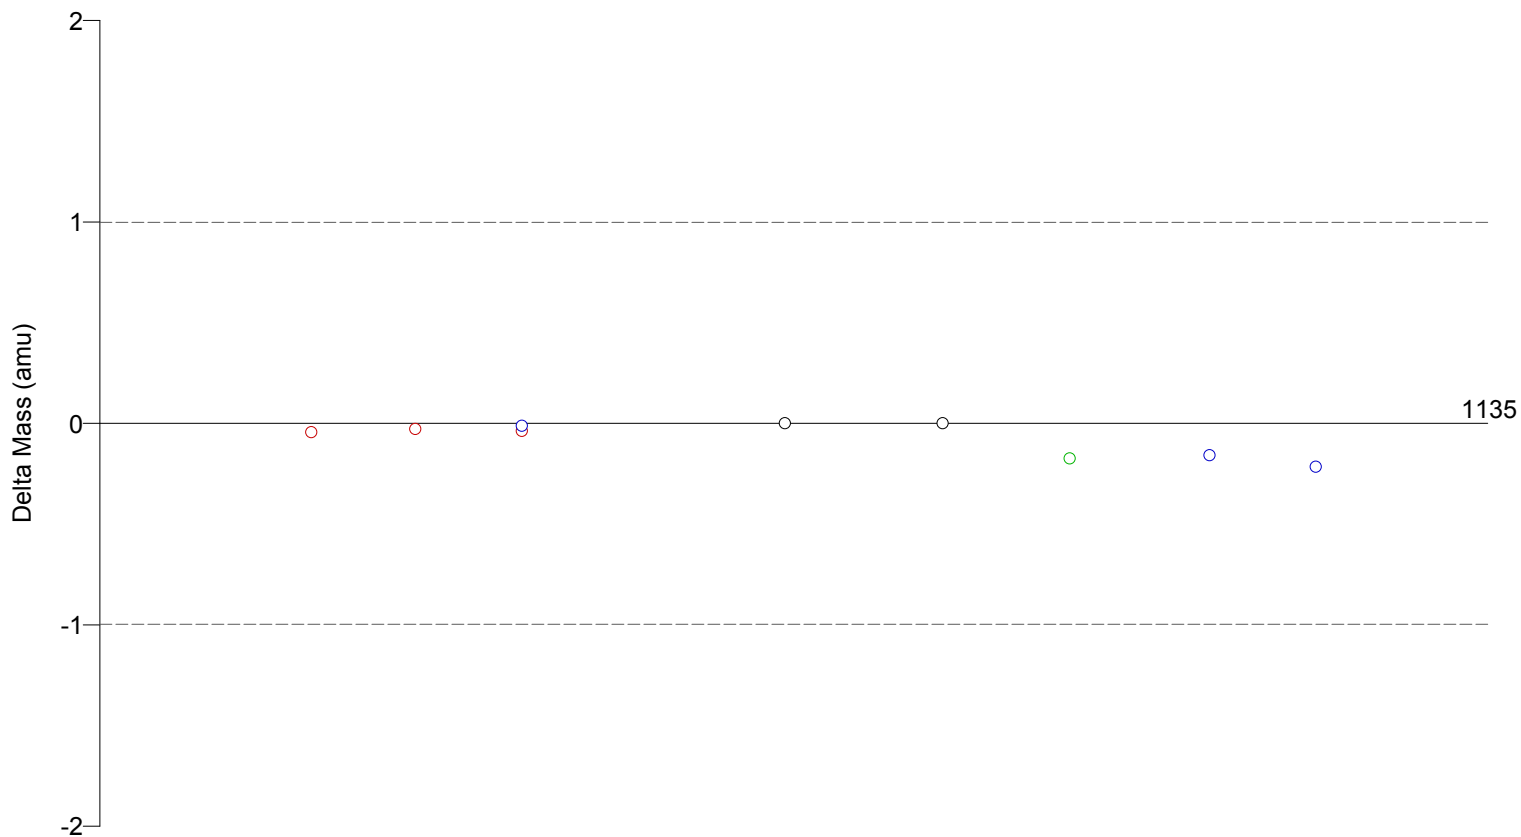

#2118291816-26226248 NL: 2.31E5



---

| Reference                                                      |                    |         |   | P | Score | Coverage | Accession |     |       |       |
|----------------------------------------------------------------|--------------------|---------|---|---|-------|----------|-----------|-----|-------|-------|
| Scan(s)                                                        | Sequence           | MH+     | z | P | XC    | DeltaCn  | Sp        | RSp | Ions  | Count |
| IPI:IPI00411614.1 SWISS-PROT:O75717 TREMBL:A8KAE0;Q05DR3 ENSEM |                    |         |   | 1 | 8.1   | 0.0      | 0         |     |       |       |
| 19287468 - 1                                                   | K.GETASEGTEAKKRK.R | 1491.78 | 3 | 1 | 1.815 | 0.629    | 168.0     | 2   | 16/78 | 1     |

---

1 of 1 peptide matches reported, 0 removed due to filtering

DTA for scans: 19287468-1  
Precursor ion: 497.93  
Mass type: mono  
Mod's: (M\* +15.99492) C=161.01468

Ion series for charge: +1

| AA | A ions        | B ions        | B* ions | Bo ions | C ions | Y ions        | Y* ions | Yo ions | Z ions |
|----|---------------|---------------|---------|---------|--------|---------------|---------|---------|--------|
| G  | 30.03         | 58.03         |         |         |        |               |         |         |        |
| E  | 159.08        | 187.07        |         |         |        | 1434.75       |         |         |        |
| T  | 260.12        | 288.12        |         |         |        | 1305.71       |         |         |        |
| A  | 331.16        | <b>359.16</b> |         |         |        | 1204.66       |         |         |        |
| S  | <b>418.19</b> | 446.19        |         |         |        | 1133.63       |         |         |        |
| E  | 547.24        | 575.23        |         |         |        | 1046.60       |         |         |        |
| G  | 604.26        | 632.25        |         |         |        | 917.55        |         |         |        |
| T  | 705.30        | <b>733.30</b> |         |         |        | 860.53        |         |         |        |
| E  | 834.35        | 862.34        |         |         |        | <b>759.48</b> |         |         |        |
| A  | 905.38        | 933.38        |         |         |        | <b>630.44</b> |         |         |        |
| K  | 1033.48       | 1061.47       |         |         |        | <b>559.40</b> |         |         |        |
| K  | 1161.57       | 1189.57       |         |         |        | 431.31        |         |         |        |
| R  | 1317.68       | 1345.67       |         |         |        | 303.21        |         |         |        |
| K  |               |               |         |         |        | 147.11        |         |         |        |

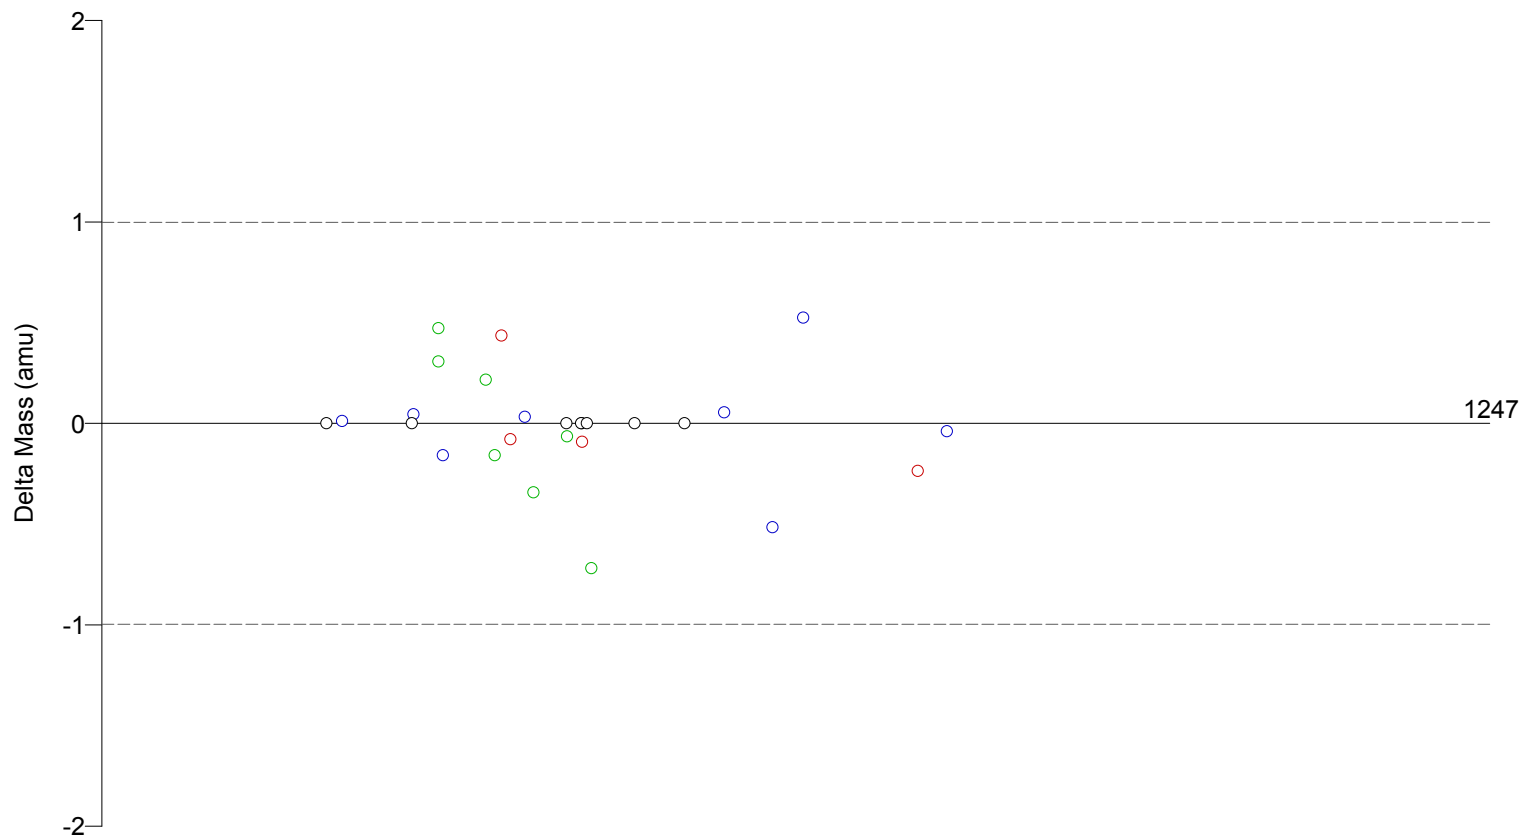

#19287468-1 NL: 3.10E6

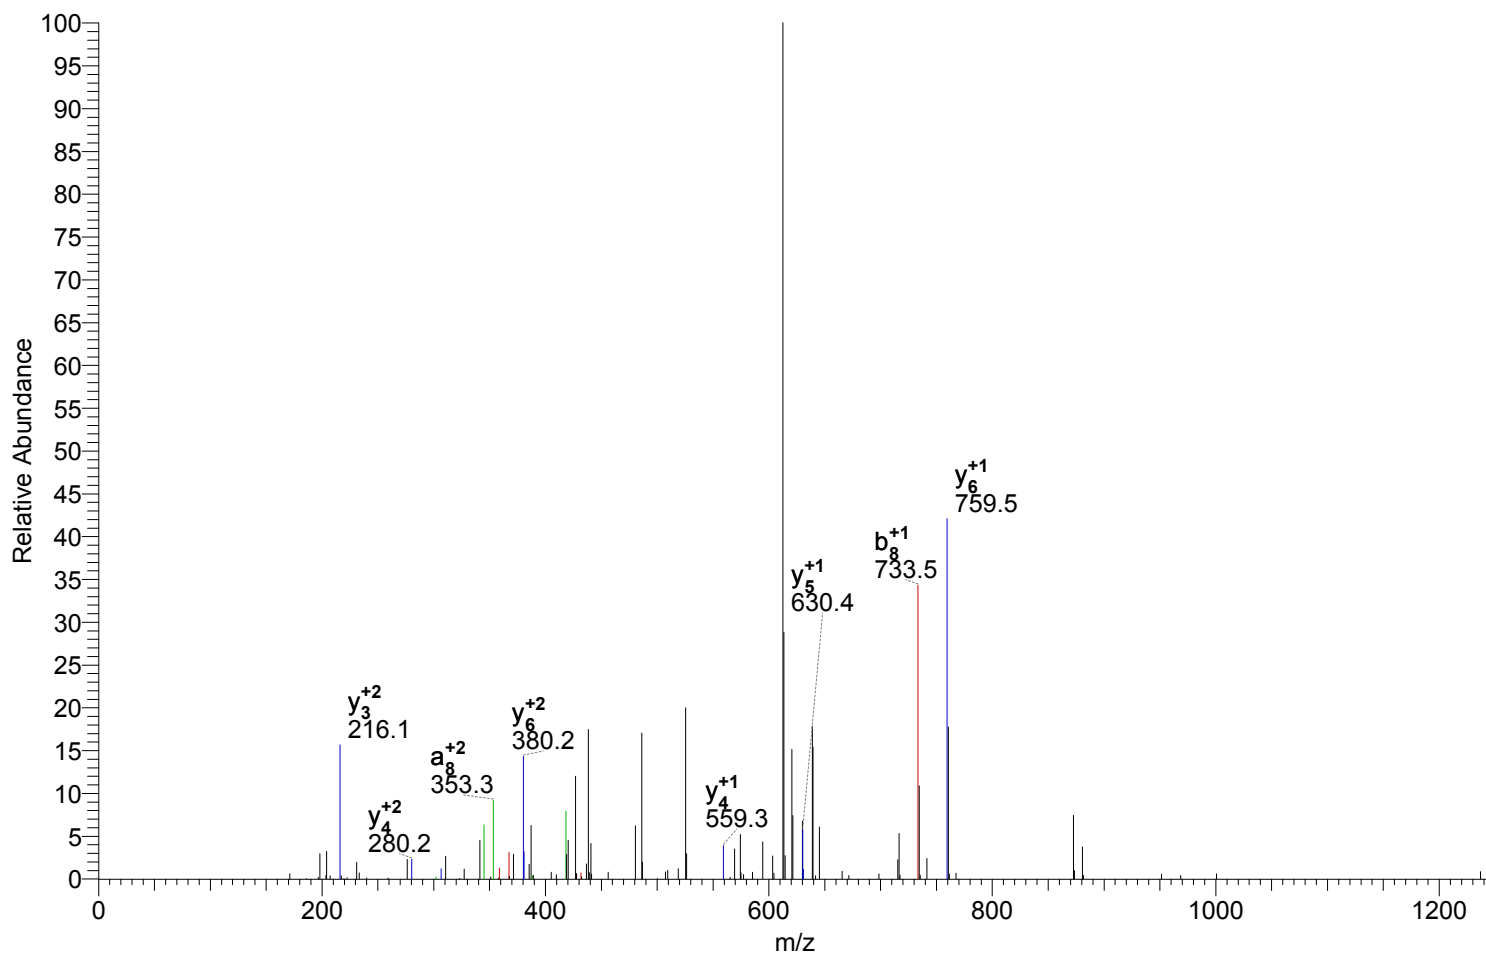

---

| Reference                          |                    |         |   | P | Score | Coverage | Accession |     |       |       |
|------------------------------------|--------------------|---------|---|---|-------|----------|-----------|-----|-------|-------|
| Scan(s)                            | Sequence           | MH+     | z | P | XC    | DeltaCn  | Sp        | RSp | Ions  | Count |
| IPI:IPI00513835.1 TREMBL:A8MRA5;B3 |                    |         |   | 1 | 8.1   | 0.0      | 0         |     |       |       |
| 19287468 - 1                       | K.GETASEGTEAKKRK.R | 1491.78 | 3 | 1 | 1.815 | 0.629    | 168.0     | 2   | 16/78 | 1     |

---

1 of 1 peptide matches reported, 0 removed due to filtering

DTA for scans: 19287468-1  
Precursor ion: 497.93  
Mass type: mono  
Mod's: (M\* +15.99492) C=161.01468

Ion series for charge: +1

| AA | A ions        | B ions        | B* ions | Bo ions | C ions | Y ions        | Y* ions | Yo ions | Z ions |
|----|---------------|---------------|---------|---------|--------|---------------|---------|---------|--------|
| G  | 30.03         | 58.03         |         |         |        |               |         |         |        |
| E  | 159.08        | 187.07        |         |         |        | 1434.75       |         |         |        |
| T  | 260.12        | 288.12        |         |         |        | 1305.71       |         |         |        |
| A  | 331.16        | <b>359.16</b> |         |         |        | 1204.66       |         |         |        |
| S  | <b>418.19</b> | 446.19        |         |         |        | 1133.63       |         |         |        |
| E  | 547.24        | 575.23        |         |         |        | 1046.60       |         |         |        |
| G  | 604.26        | 632.25        |         |         |        | 917.55        |         |         |        |
| T  | 705.30        | <b>733.30</b> |         |         |        | 860.53        |         |         |        |
| E  | 834.35        | 862.34        |         |         |        | <b>759.48</b> |         |         |        |
| A  | 905.38        | 933.38        |         |         |        | <b>630.44</b> |         |         |        |
| K  | 1033.48       | 1061.47       |         |         |        | <b>559.40</b> |         |         |        |
| K  | 1161.57       | 1189.57       |         |         |        | 431.31        |         |         |        |
| R  | 1317.68       | 1345.67       |         |         |        | 303.21        |         |         |        |
| K  |               |               |         |         |        | 147.11        |         |         |        |



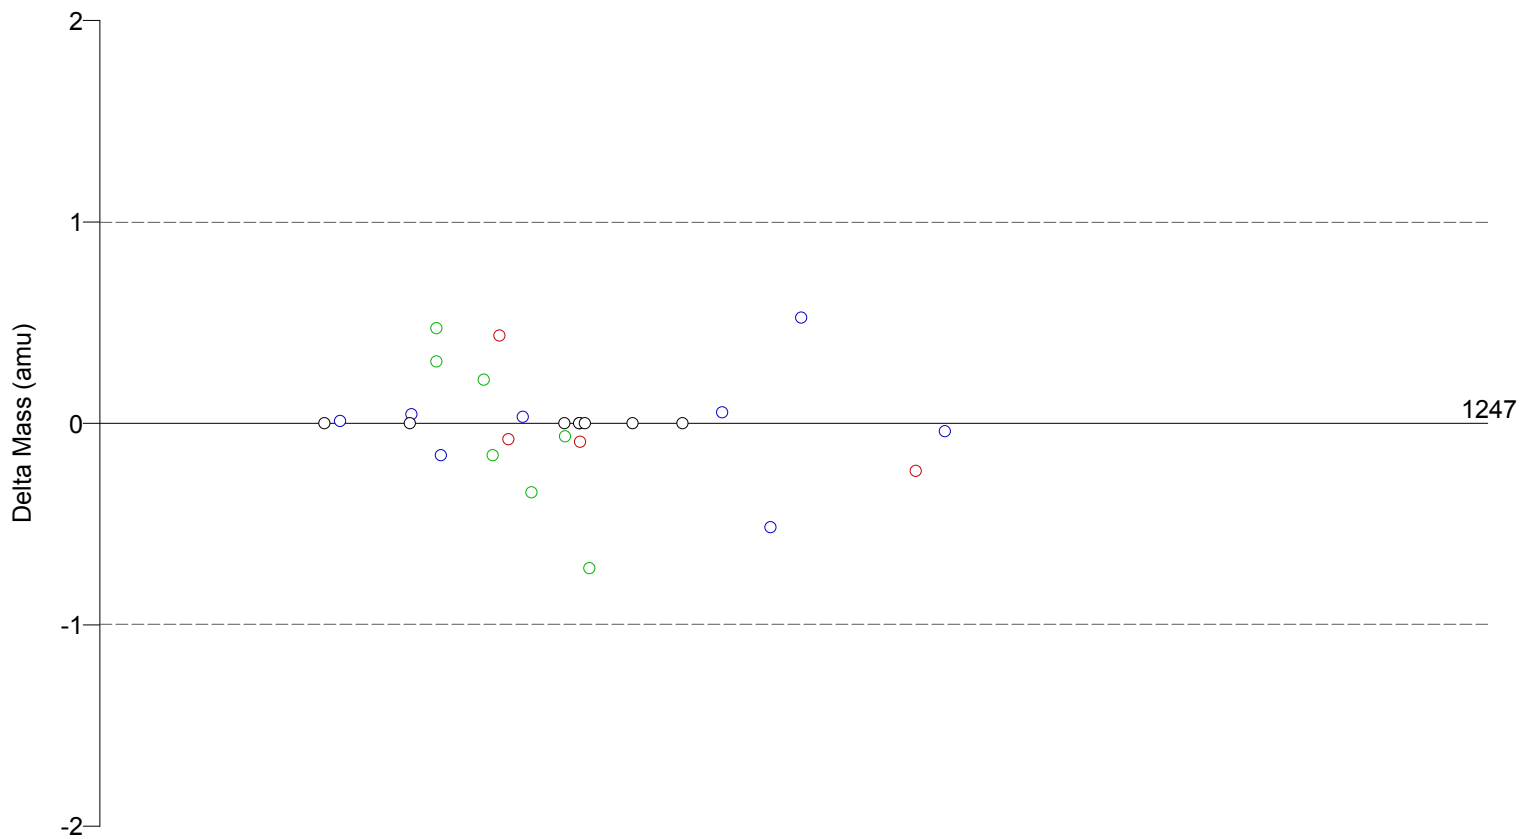

#19287468-1 NL: 3.10E6

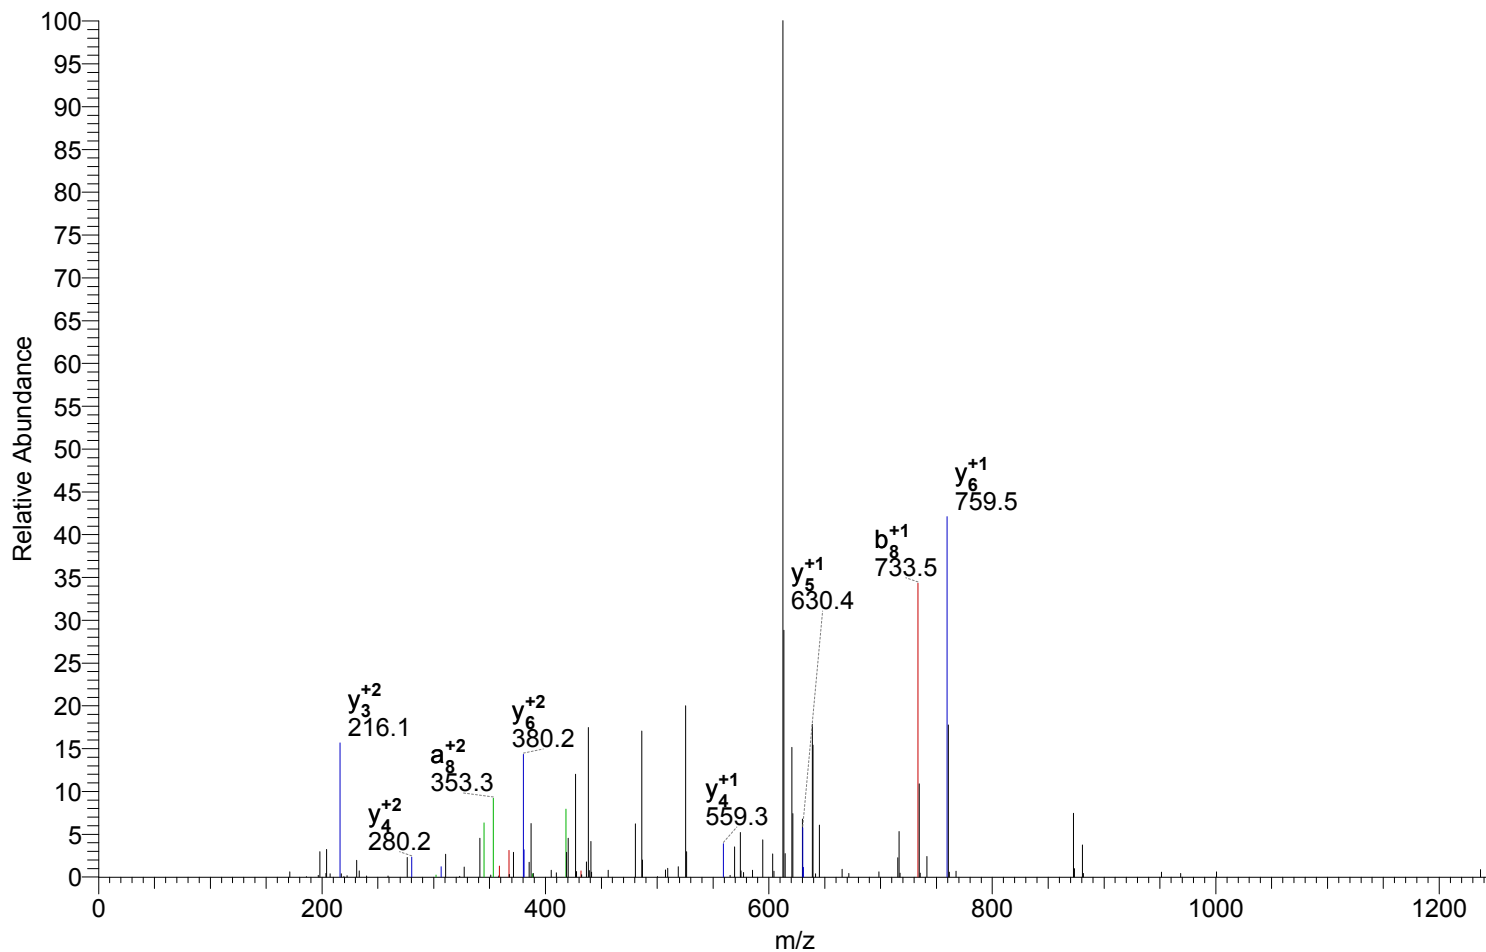

---

| Reference                                                      |                    |         |   | P   | Score | Coverage | Accession |     |       |       |
|----------------------------------------------------------------|--------------------|---------|---|-----|-------|----------|-----------|-----|-------|-------|
| Scan(s)                                                        | Sequence           | MH+     | z | P   | XC    | DeltaCn  | Sp        | RSp | Ions  | Count |
| IPI:IPI00418991.5 SWISS-PROT:Q2KHR3-1 TREMBL:B3KVV1 ENSEMBL:EN |                    |         |   | 1   | 10.1  | 0.0      | 0         |     |       |       |
| 19287468 - 1                                                   | K.GKGQVKEEDNSNQK.Q | 1560.76 | 2 | 0.2 | 2.747 | 0.382    | 212.8     | 1   | 11/39 | 2     |

1 of 1 peptide matches reported, 0 removed due to filtering

DTA for scans: 19287468-1  
Precursor ion: 780.88  
Mass type: mono  
Mod's: (M\* +15.99492) C=161.01468

Ion series for charge: +1

| AA | A ions  | B ions         | B* ions | Bo ions | C ions | Y ions         | Y* ions | Yo ions | Z ions |
|----|---------|----------------|---------|---------|--------|----------------|---------|---------|--------|
| G  | 30.03   | 58.03          |         |         |        |                |         |         |        |
| K  | 158.13  | 186.12         |         |         |        | 1503.74        |         |         |        |
| G  | 215.15  | 243.15         |         |         |        | 1375.64        |         |         |        |
| Q  | 343.21  | <b>371.20</b>  |         |         |        | 1318.62        |         |         |        |
| V  | 442.28  | 470.27         |         |         |        | <b>1190.56</b> |         |         |        |
| K  | 570.37  | <b>598.37</b>  |         |         |        | 1091.50        |         |         |        |
| E  | 699.41  | <b>727.41</b>  |         |         |        | <b>963.40</b>  |         |         |        |
| E  | 828.46  | <b>856.45</b>  |         |         |        | <b>834.36</b>  |         |         |        |
| D  | 943.48  | 971.48         |         |         |        | 705.32         |         |         |        |
| N  | 1057.53 | 1085.52        |         |         |        | 590.29         |         |         |        |
| S  | 1144.56 | <b>1172.55</b> |         |         |        | 476.25         |         |         |        |
| N  | 1258.60 | <b>1286.60</b> |         |         |        | <b>389.21</b>  |         |         |        |
| Q  | 1386.66 | <b>1414.66</b> |         |         |        | 275.17         |         |         |        |
| K  |         |                |         |         |        | 147.11         |         |         |        |

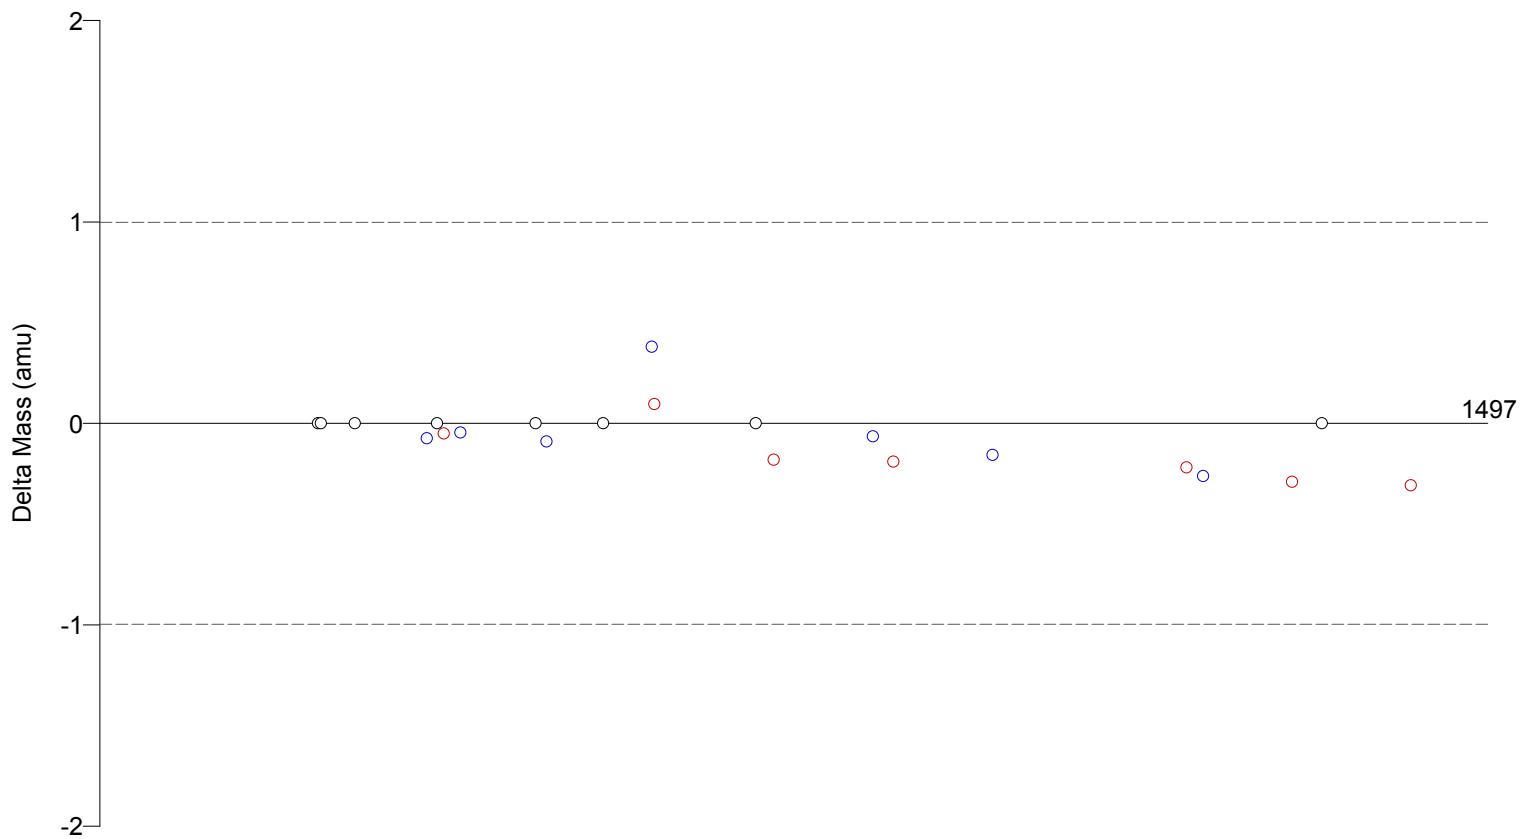

#19287468-1 NL: 6.84E4

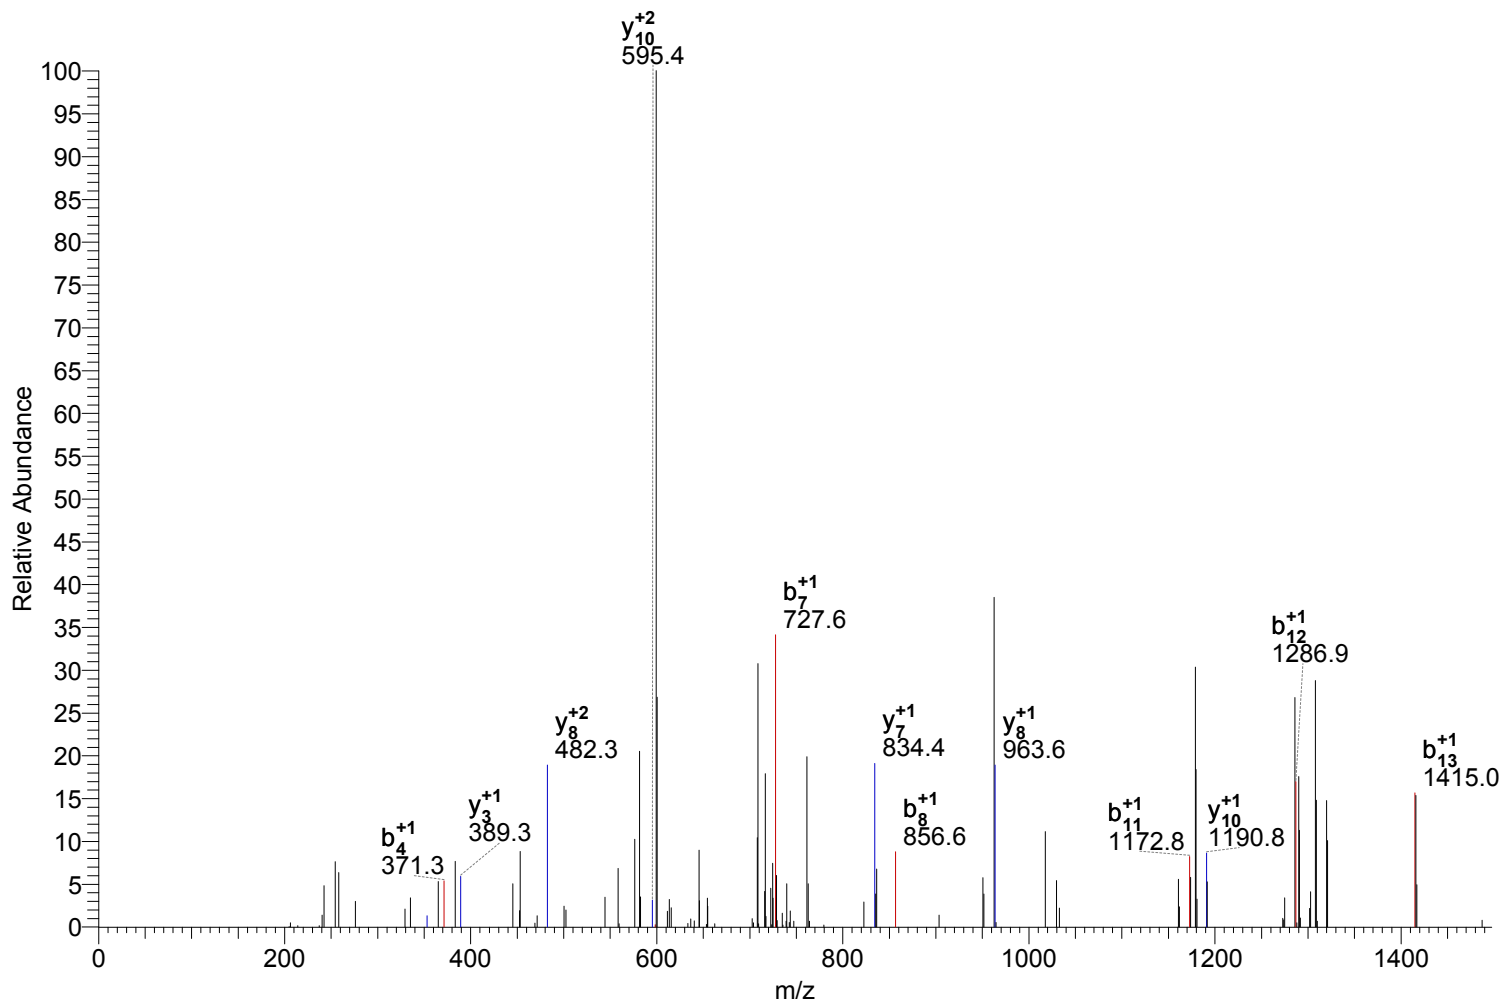

---

| Reference                          |                     |         |   | P   | Score | Coverage | Accession |     |       |       |
|------------------------------------|---------------------|---------|---|-----|-------|----------|-----------|-----|-------|-------|
| Scan(s)                            | Sequence            | MH+     | z | P   | XC    | DeltaCn  | Sp        | RSp | Ions  | Count |
| IPI:IPI00745241.1 TREMBL:Q9H6S7 Ta |                     |         |   | 1   | 10.1  | 0.0      | 0         |     |       |       |
| 19287468 - 1                       | K.GKGQVKKEEDNSNQK.Q | 1560.76 | 2 | 0.2 | 2.747 | 0.382    | 212.8     | 1   | 11/39 | 2     |

1 of 1 peptide matches reported, 0 removed due to filtering

DTA for scans: 19287468-1  
Precursor ion: 780.88  
Mass type: mono  
Mod's: (M\* +15.99492) C=161.01468

Ion series for charge: +1

| AA | A ions  | B ions         | B* ions | Bo ions | C ions | Y ions         | Y* ions | Yo ions | Z ions |
|----|---------|----------------|---------|---------|--------|----------------|---------|---------|--------|
| G  | 30.03   | 58.03          |         |         |        |                |         |         |        |
| K  | 158.13  | 186.12         |         |         |        | 1503.74        |         |         |        |
| G  | 215.15  | 243.15         |         |         |        | 1375.64        |         |         |        |
| Q  | 343.21  | <b>371.20</b>  |         |         |        | 1318.62        |         |         |        |
| V  | 442.28  | 470.27         |         |         |        | <b>1190.56</b> |         |         |        |
| K  | 570.37  | <b>598.37</b>  |         |         |        | 1091.50        |         |         |        |
| E  | 699.41  | <b>727.41</b>  |         |         |        | <b>963.40</b>  |         |         |        |
| E  | 828.46  | <b>856.45</b>  |         |         |        | <b>834.36</b>  |         |         |        |
| D  | 943.48  | 971.48         |         |         |        | 705.32         |         |         |        |
| N  | 1057.53 | 1085.52        |         |         |        | 590.29         |         |         |        |
| S  | 1144.56 | <b>1172.55</b> |         |         |        | 476.25         |         |         |        |
| N  | 1258.60 | <b>1286.60</b> |         |         |        | <b>389.21</b>  |         |         |        |
| Q  | 1386.66 | <b>1414.66</b> |         |         |        | 275.17         |         |         |        |
| K  |         |                |         |         |        | 147.11         |         |         |        |

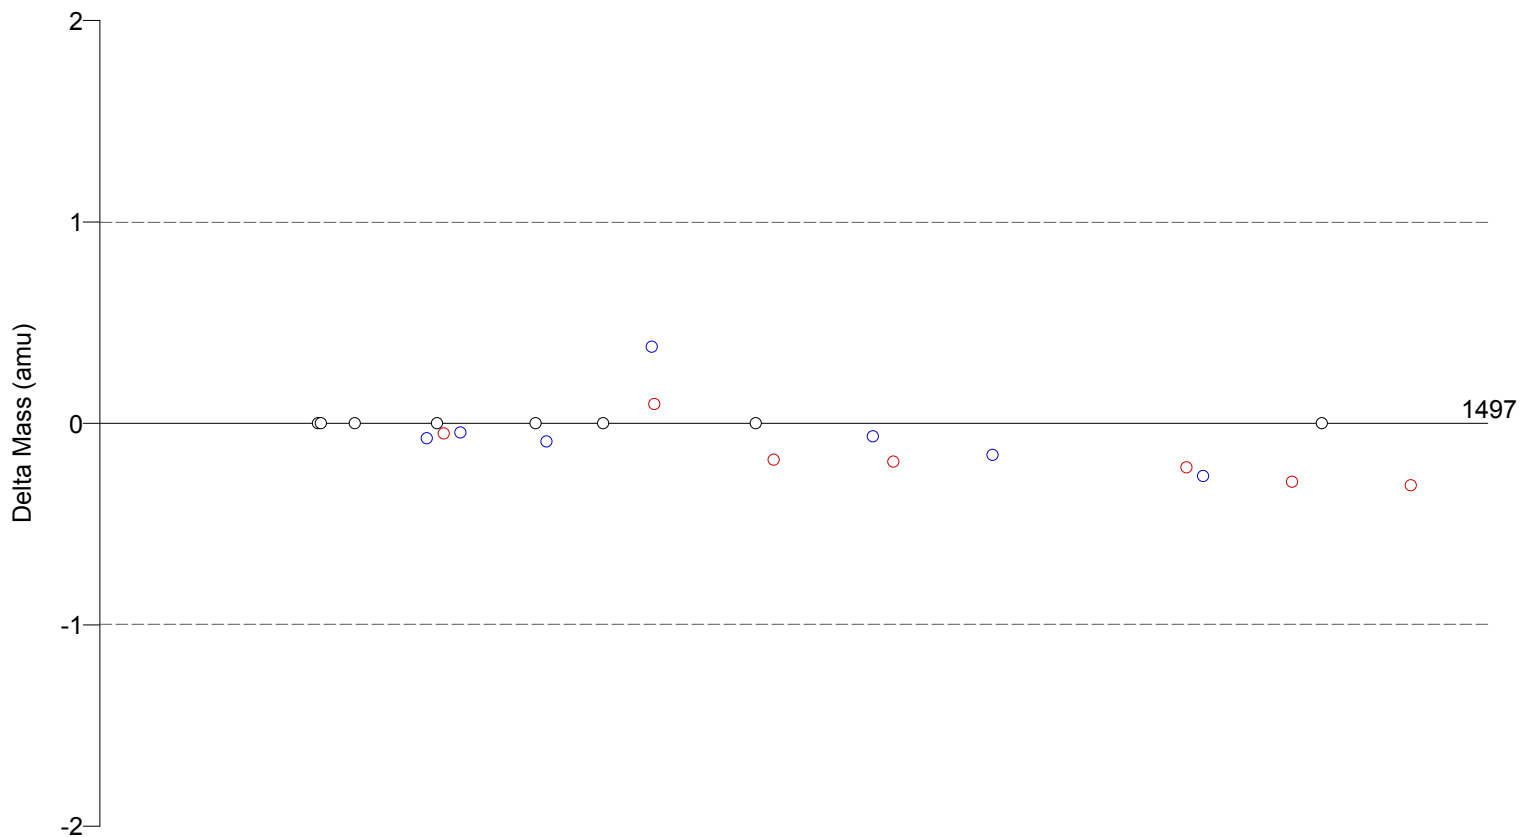

#19287468-1 NL: 6.84E4

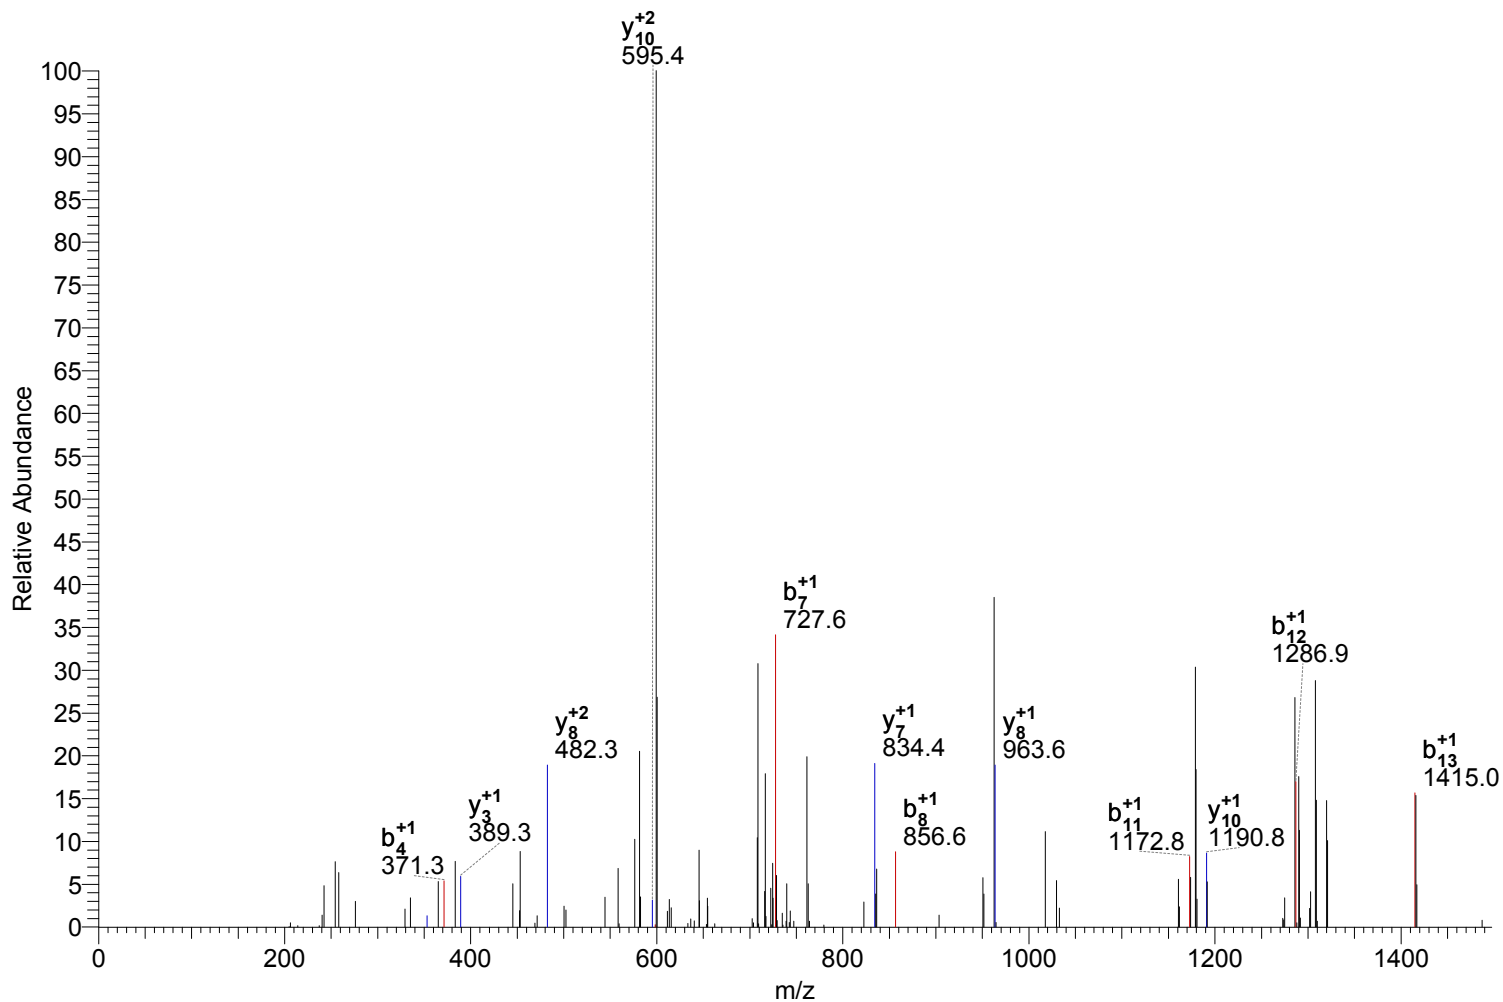

---

| Reference                          |                    |         |   | P   | Score | Coverage | Accession |     |       |       |
|------------------------------------|--------------------|---------|---|-----|-------|----------|-----------|-----|-------|-------|
| Scan(s)                            | Sequence           | MH+     | z | P   | XC    | DeltaCn  | Sp        | RSp | Ions  | Count |
| IPI:IPI00847870.1 SWISS-PROT:Q2KHR |                    |         |   | 1   | 10.1  | 0.0      | 0         |     |       |       |
| 19287468 - 1                       | K.GKGQVKEEDNSNQK.Q | 1560.76 | 2 | 0.2 | 2.747 | 0.382    | 212.8     | 1   | 11/39 | 2     |

1 of 1 peptide matches reported, 0 removed due to filtering



DTA for scans: 19287468-1  
Precursor ion: 780.88  
Mass type: mono  
Mod's: (M\* +15.99492) C=161.01468

Ion series for charge: +1

| AA | A ions  | B ions         | B* ions | Bo ions | C ions | Y ions         | Y* ions | Yo ions | Z ions |
|----|---------|----------------|---------|---------|--------|----------------|---------|---------|--------|
| G  | 30.03   | 58.03          |         |         |        |                |         |         |        |
| K  | 158.13  | 186.12         |         |         |        | 1503.74        |         |         |        |
| G  | 215.15  | 243.15         |         |         |        | 1375.64        |         |         |        |
| Q  | 343.21  | <b>371.20</b>  |         |         |        | 1318.62        |         |         |        |
| V  | 442.28  | 470.27         |         |         |        | <b>1190.56</b> |         |         |        |
| K  | 570.37  | <b>598.37</b>  |         |         |        | 1091.50        |         |         |        |
| E  | 699.41  | <b>727.41</b>  |         |         |        | <b>963.40</b>  |         |         |        |
| E  | 828.46  | <b>856.45</b>  |         |         |        | <b>834.36</b>  |         |         |        |
| D  | 943.48  | 971.48         |         |         |        | 705.32         |         |         |        |
| N  | 1057.53 | 1085.52        |         |         |        | 590.29         |         |         |        |
| S  | 1144.56 | <b>1172.55</b> |         |         |        | 476.25         |         |         |        |
| N  | 1258.60 | <b>1286.60</b> |         |         |        | <b>389.21</b>  |         |         |        |
| Q  | 1386.66 | <b>1414.66</b> |         |         |        | 275.17         |         |         |        |
| K  |         |                |         |         |        | 147.11         |         |         |        |



#19287468-1 NL: 6.84E4



---

| Reference                                                      |                       |         |   | P   | Score | Coverage | Accession |     |      |       |
|----------------------------------------------------------------|-----------------------|---------|---|-----|-------|----------|-----------|-----|------|-------|
| Scan(s)                                                        | Sequence              | MH+     | z | P   | XC    | DeltaCn  | Sp        | RSp | Ions | Count |
| IPI:IPI00003330.4 SWISS-PROT:Q9NTU4 ENSEMBL:ENSP00000330877 RE |                       |         |   | 1   | 8.1   | 0.0      |           | 0   |      |       |
| 19287468 - 1                                                   | K.SSSM*SSLNIAKHMPHR.A | 1798.87 | 2 | 0.2 | 1.976 | 0.523    | 81.9      | 6   | 7/45 |       |

---

1 of 1 peptide matches reported, 0 removed due to filtering

DTA for scans: 19287468-1  
Precursor ion: 899.94  
Mass type: mono  
Mod's: (M\* +15.99492) C=161.01468

Ion series for charge: +1

| AA | A ions  | B ions        | B* ions | Bo ions | C ions | Y ions         | Y* ions | Yo ions | Z ions |
|----|---------|---------------|---------|---------|--------|----------------|---------|---------|--------|
| S  | 60.04   | 88.04         |         |         |        |                |         |         |        |
| S  | 147.08  | 175.07        |         |         |        | 1711.84        |         |         |        |
| S  | 234.11  | 262.10        |         |         |        | 1624.80        |         |         |        |
| M* | 381.14  | 409.14        |         |         |        | 1537.77        |         |         |        |
| S  | 468.18  | 496.17        |         |         |        | 1390.74        |         |         |        |
| S  | 555.21  | <b>583.20</b> |         |         |        | 1303.71        |         |         |        |
| L  | 668.29  | <b>696.29</b> |         |         |        | 1216.67        |         |         |        |
| N  | 782.33  | <b>810.33</b> |         |         |        | <b>1103.59</b> |         |         |        |
| I  | 895.42  | <b>923.41</b> |         |         |        | <b>989.55</b>  |         |         |        |
| A  | 966.46  | 994.45        |         |         |        | <b>876.46</b>  |         |         |        |
| K  | 1094.55 | 1122.55       |         |         |        | 805.42         |         |         |        |
| H  | 1231.61 | 1259.60       |         |         |        | 677.33         |         |         |        |
| M  | 1362.65 | 1390.65       |         |         |        | 540.27         |         |         |        |
| P  | 1459.70 | 1487.70       |         |         |        | 409.23         |         |         |        |
| H  | 1596.76 | 1624.76       |         |         |        | 312.18         |         |         |        |
| R  |         |               |         |         |        | 175.12         |         |         |        |

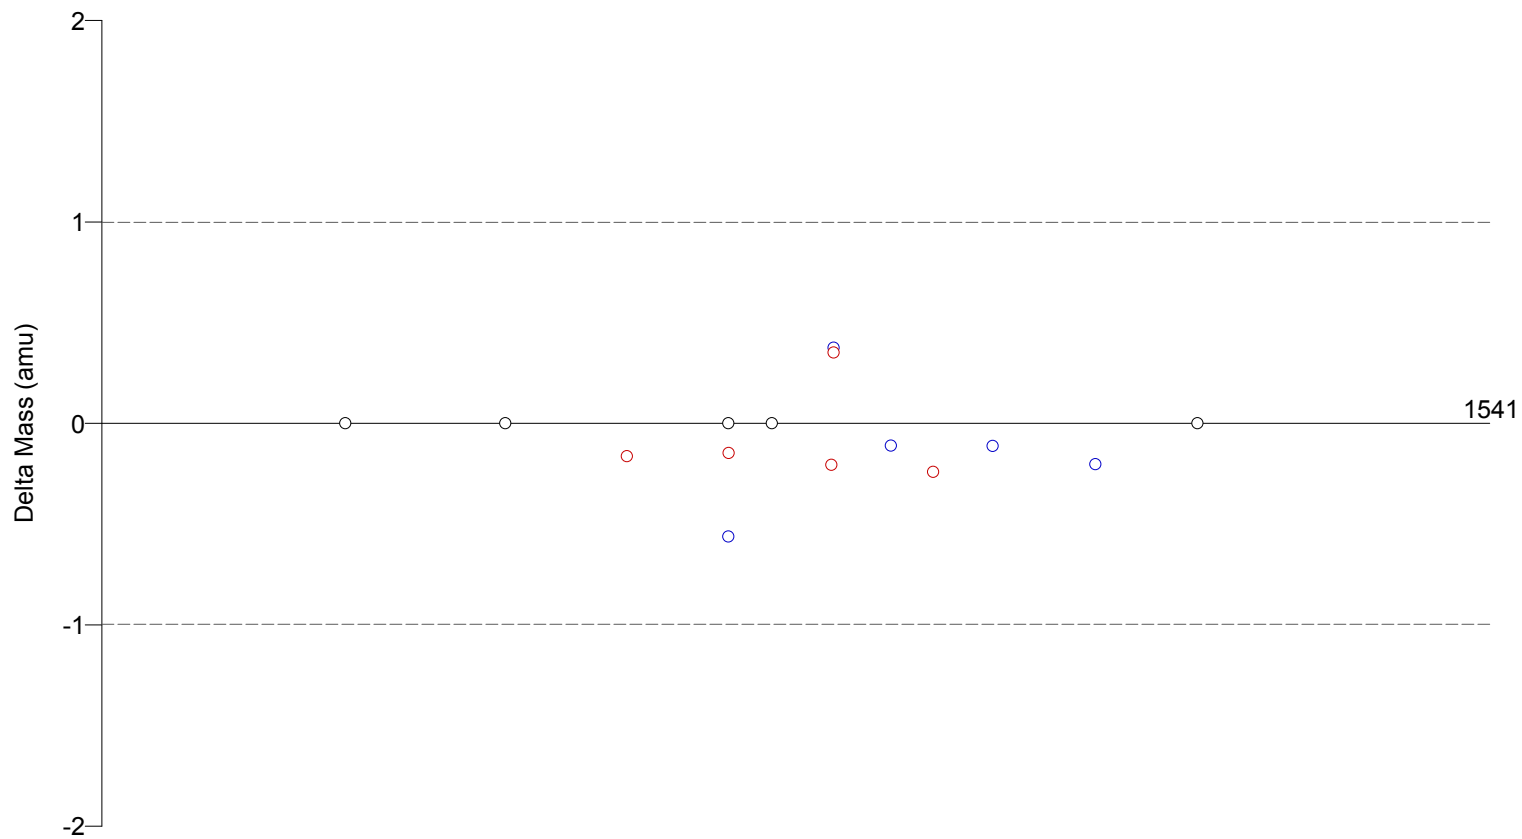

#19287468-1 NL: 2.53E6

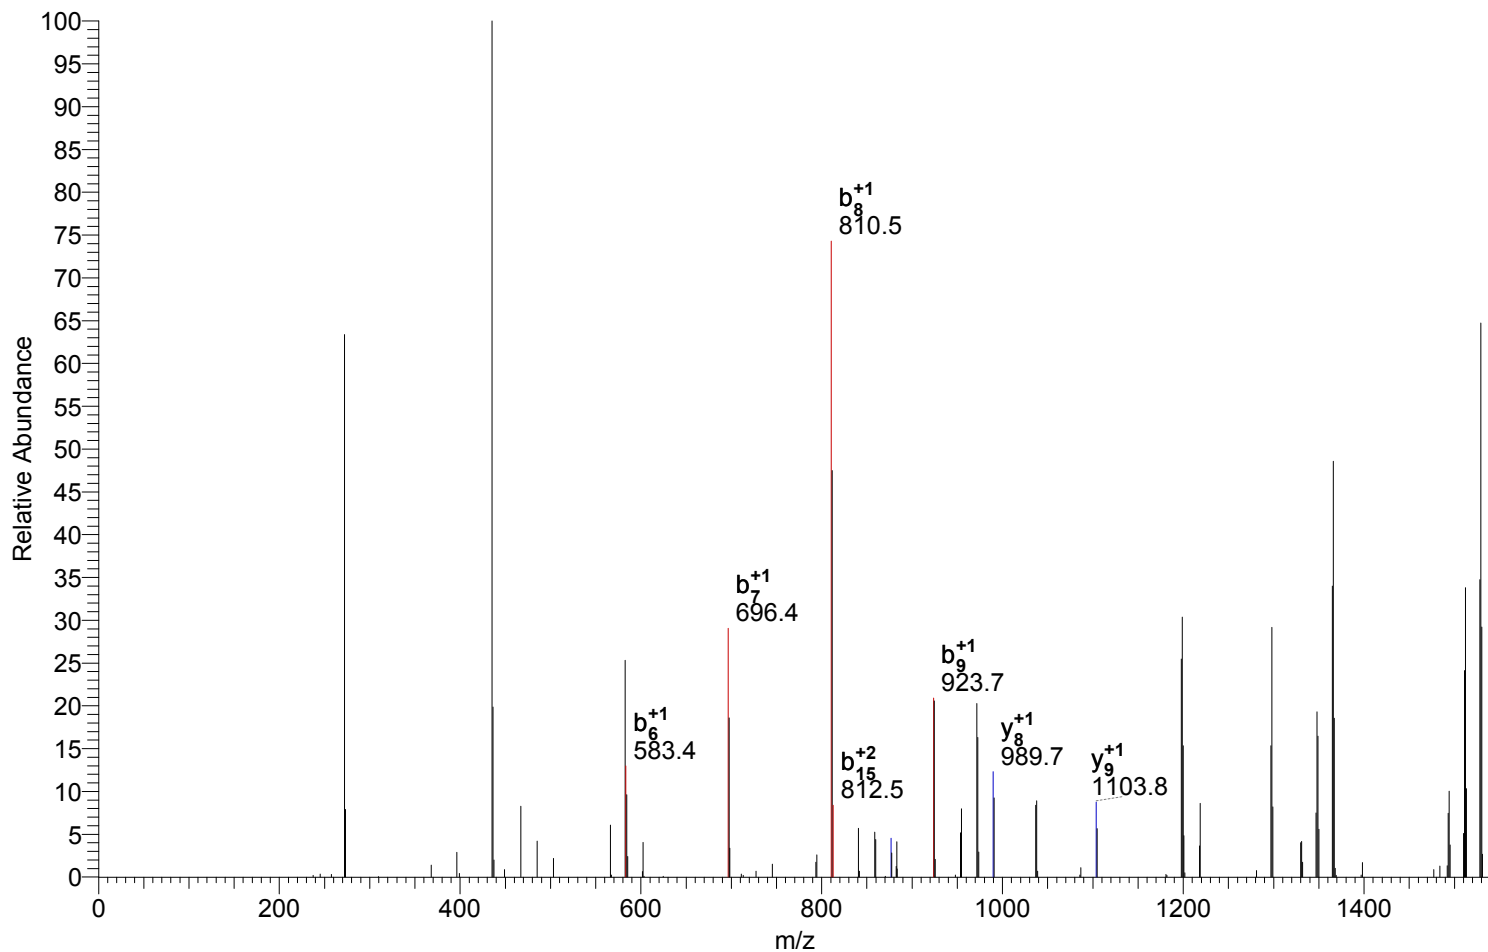

---

| Reference                                                      |                |         |   | P | Score | Coverage | Accession |     |      |       |
|----------------------------------------------------------------|----------------|---------|---|---|-------|----------|-----------|-----|------|-------|
| Scan(s)                                                        | Sequence       | MH+     | z | P | XC    | DeltaCn  | Sp        | RSp | Ions | Count |
| IPI:IPI00477176.1 SWISS-PROT:Q96LC9-1 ENSEMBL:ENSP00000346697; |                |         |   | 1 | 8.1   | 0.0      |           | 0   |      |       |
| 19287468 - 1                                                   | K.LQCIADQFHR.L | 1288.61 | 2 | 1 | 1.350 | 0.621    | 61.6      | 3   | 6/27 |       |

---

1 of 1 peptide matches reported, 0 removed due to filtering

DTA for scans: 19287468-1  
Precursor ion: 644.82  
Mass type: mono  
Mod's: (M\* +15.99492) C=161.01468

Ion series for charge: +1

| AA | A ions        | B ions        | B* ions | Bo ions | C ions | Y ions         | Y* ions | Yo ions | Z ions |
|----|---------------|---------------|---------|---------|--------|----------------|---------|---------|--------|
| L  | 86.10         | 114.09        |         |         |        |                |         |         |        |
| Q  | 214.16        | <b>242.15</b> |         |         |        | 1175.53        |         |         |        |
| C  | 375.17        | 403.16        |         |         |        | <b>1047.47</b> |         |         |        |
| I  | <b>488.25</b> | 516.25        |         |         |        | 886.45         |         |         |        |
| A  | <b>559.29</b> | 587.29        |         |         |        | 773.37         |         |         |        |
| D  | 674.32        | 702.31        |         |         |        | 702.33         |         |         |        |
| Q  | <b>802.38</b> | 830.37        |         |         |        | 587.30         |         |         |        |
| F  | <b>949.44</b> | 977.44        |         |         |        | 459.25         |         |         |        |
| H  | 1086.50       | 1114.50       |         |         |        | 312.18         |         |         |        |
| R  |               |               |         |         |        | 175.12         |         |         |        |

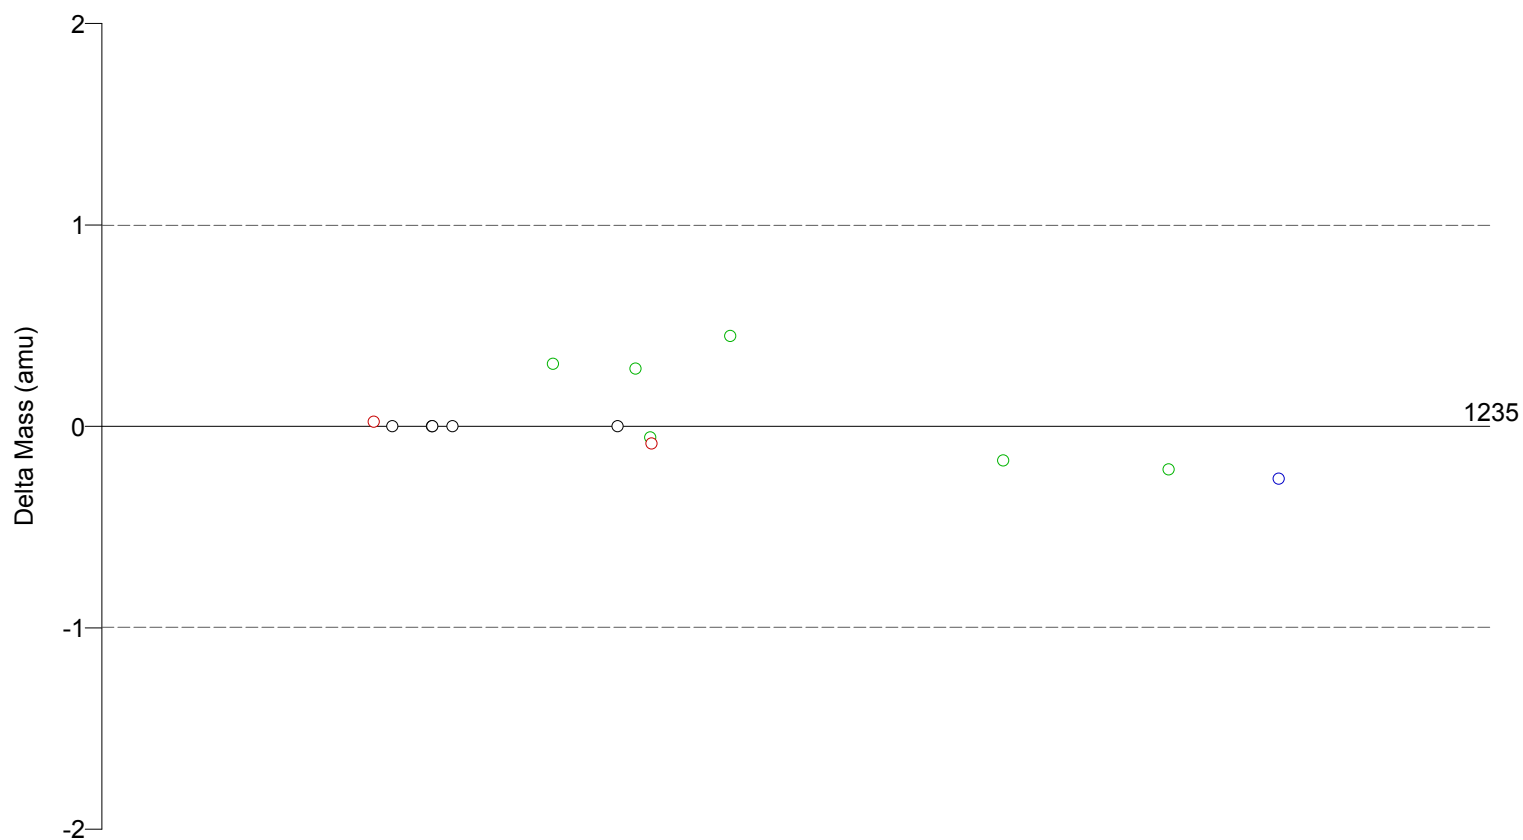

#19287468-1 NL: 4.16E6

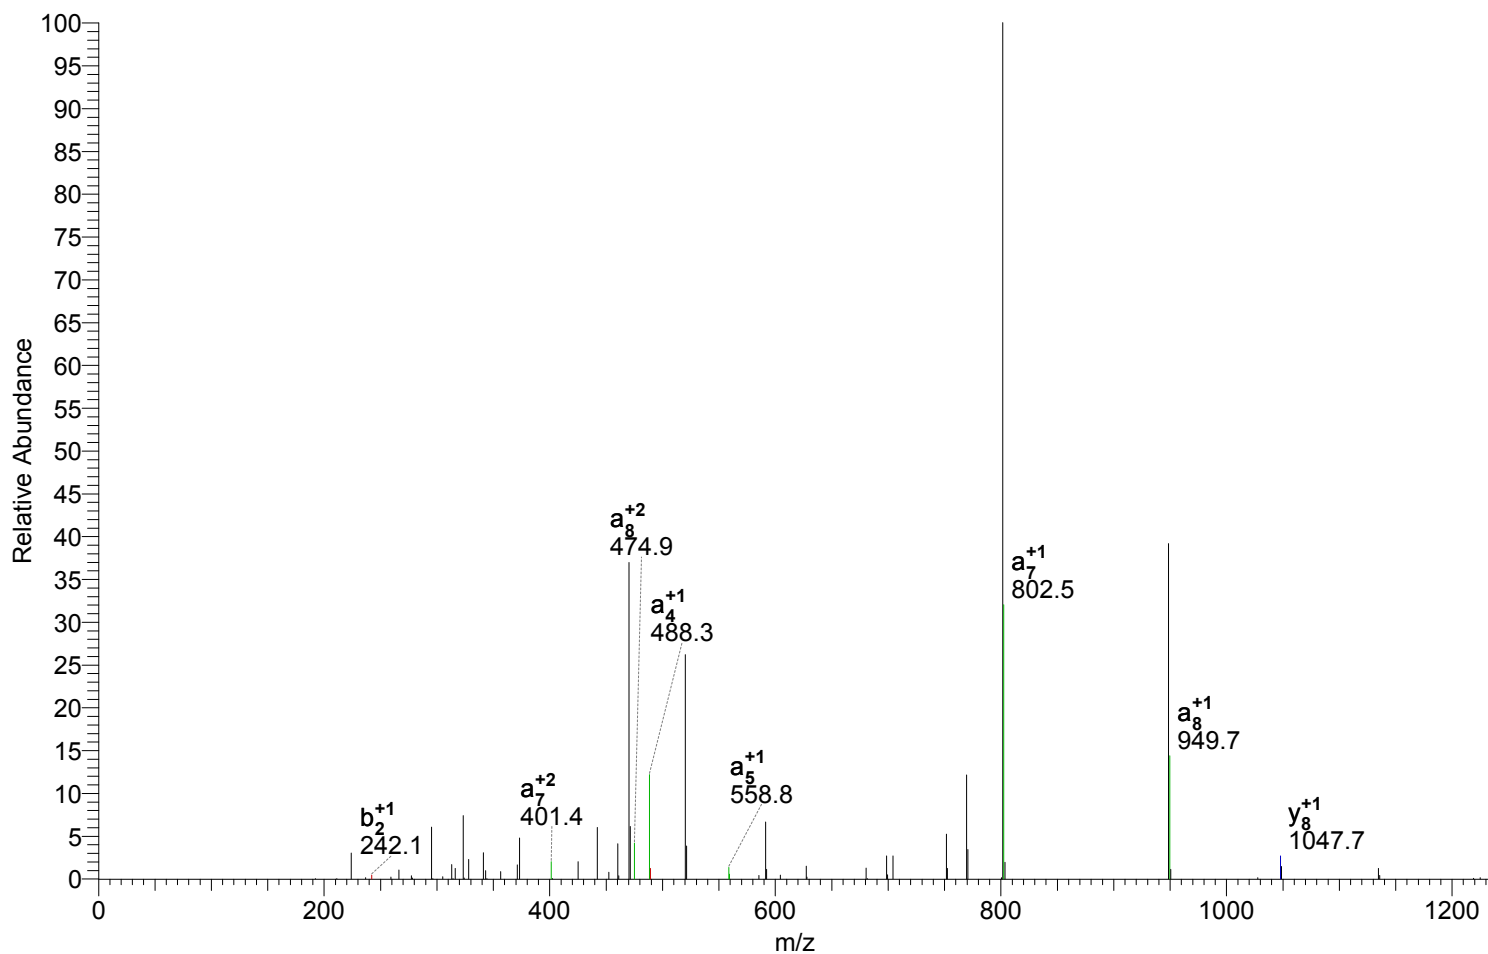



---

| Reference                                                      |                   |         |   | P   | Score | Coverage | Accession |     |       |       |
|----------------------------------------------------------------|-------------------|---------|---|-----|-------|----------|-----------|-----|-------|-------|
| Scan(s)                                                        | Sequence          | MH+     | z | P   | XC    | DeltaCn  | Sp        | RSp | Ions  | Count |
| IPI:IPI00783294.1 SWISS-PROT:Q9P267-1 TREMBL:B4E2U1 ENSEMBL:EN |                   |         |   | 1   | 8.1   | 0.0      | 0         |     |       |       |
| 19287468 - 1                                                   | K.SVNGCVPSPSDAK.S | 1318.59 | 2 | 0.2 | 2.111 | 0.618    | 149.8     | 3   | 10/36 | 1     |

1 of 1 peptide matches reported, 0 removed due to filtering

DTA for scans: 19287468-1  
Precursor ion: 659.79  
Mass type: mono  
Mod's: (M\* +15.99492) C=161.01468

Ion series for charge: +1

| AA | A ions        | B ions         | B* ions | Bo ions | C ions | Y ions         | Y* ions | Yo ions | Z ions |
|----|---------------|----------------|---------|---------|--------|----------------|---------|---------|--------|
| S  | 60.04         | 88.04          |         |         |        |                |         |         |        |
| V  | 159.11        | <b>187.11</b>  |         |         |        | 1231.56        |         |         |        |
| N  | 273.16        | 301.15         |         |         |        | <b>1132.49</b> |         |         |        |
| G  | 330.18        | 358.17         |         |         |        | 1018.45        |         |         |        |
| C  | <b>491.19</b> | <b>519.19</b>  |         |         |        | 961.43         |         |         |        |
| V  | 590.26        | 618.26         |         |         |        | 800.41         |         |         |        |
| P  | 687.31        | <b>715.31</b>  |         |         |        | 701.35         |         |         |        |
| S  | 774.35        | <b>802.34</b>  |         |         |        | 604.29         |         |         |        |
| P  | <b>871.40</b> | 899.39         |         |         |        | <b>517.26</b>  |         |         |        |
| S  | 958.43        | 986.42         |         |         |        | <b>420.21</b>  |         |         |        |
| D  | 1073.46       | 1101.45        |         |         |        | 333.18         |         |         |        |
| A  | 1144.49       | <b>1172.49</b> |         |         |        | 218.15         |         |         |        |
| K  |               |                |         |         |        | 147.11         |         |         |        |

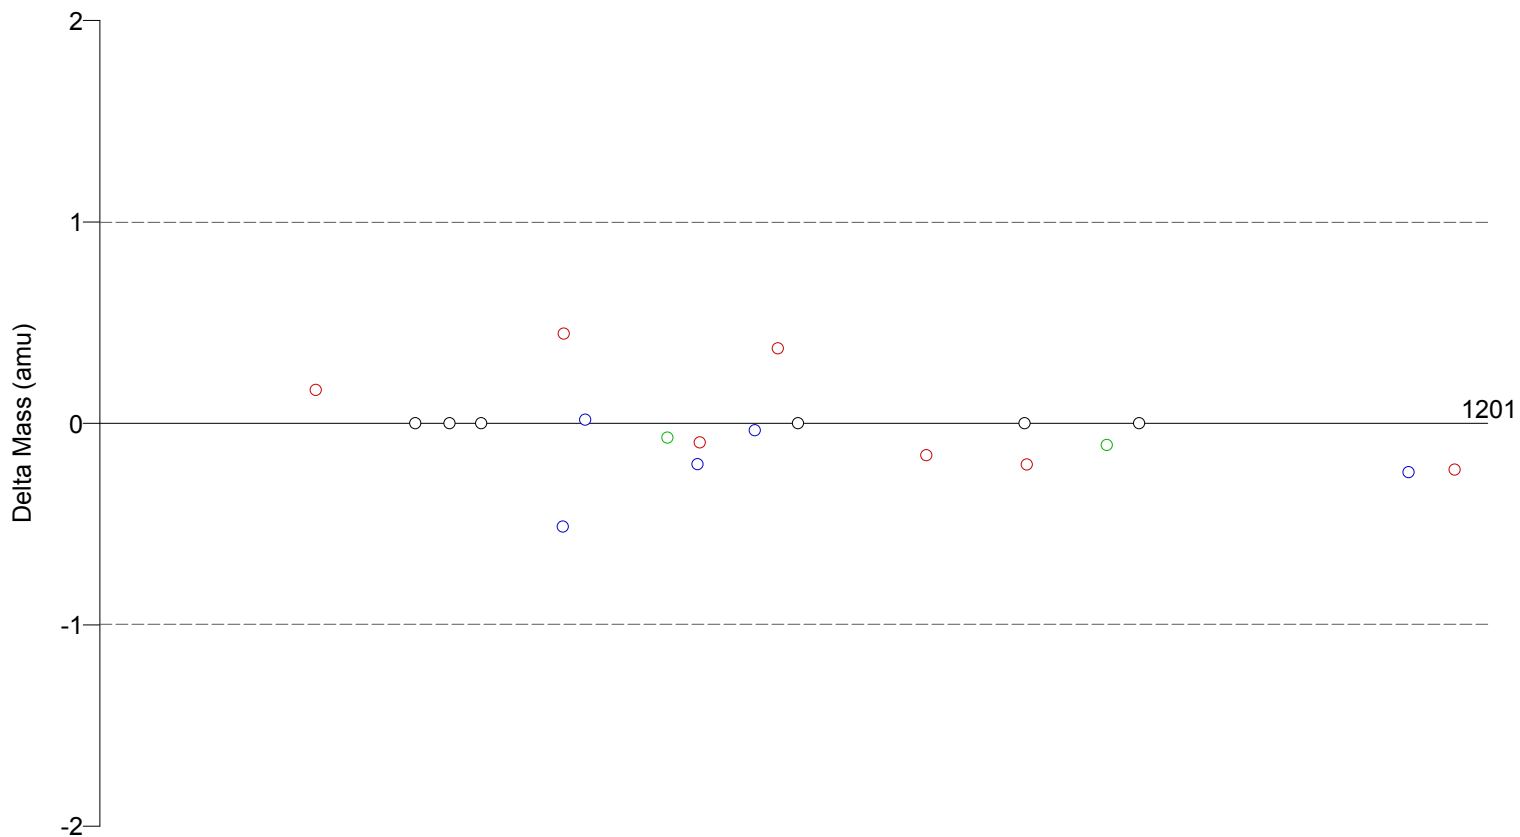

#19287468-1 NL: 2.05E5

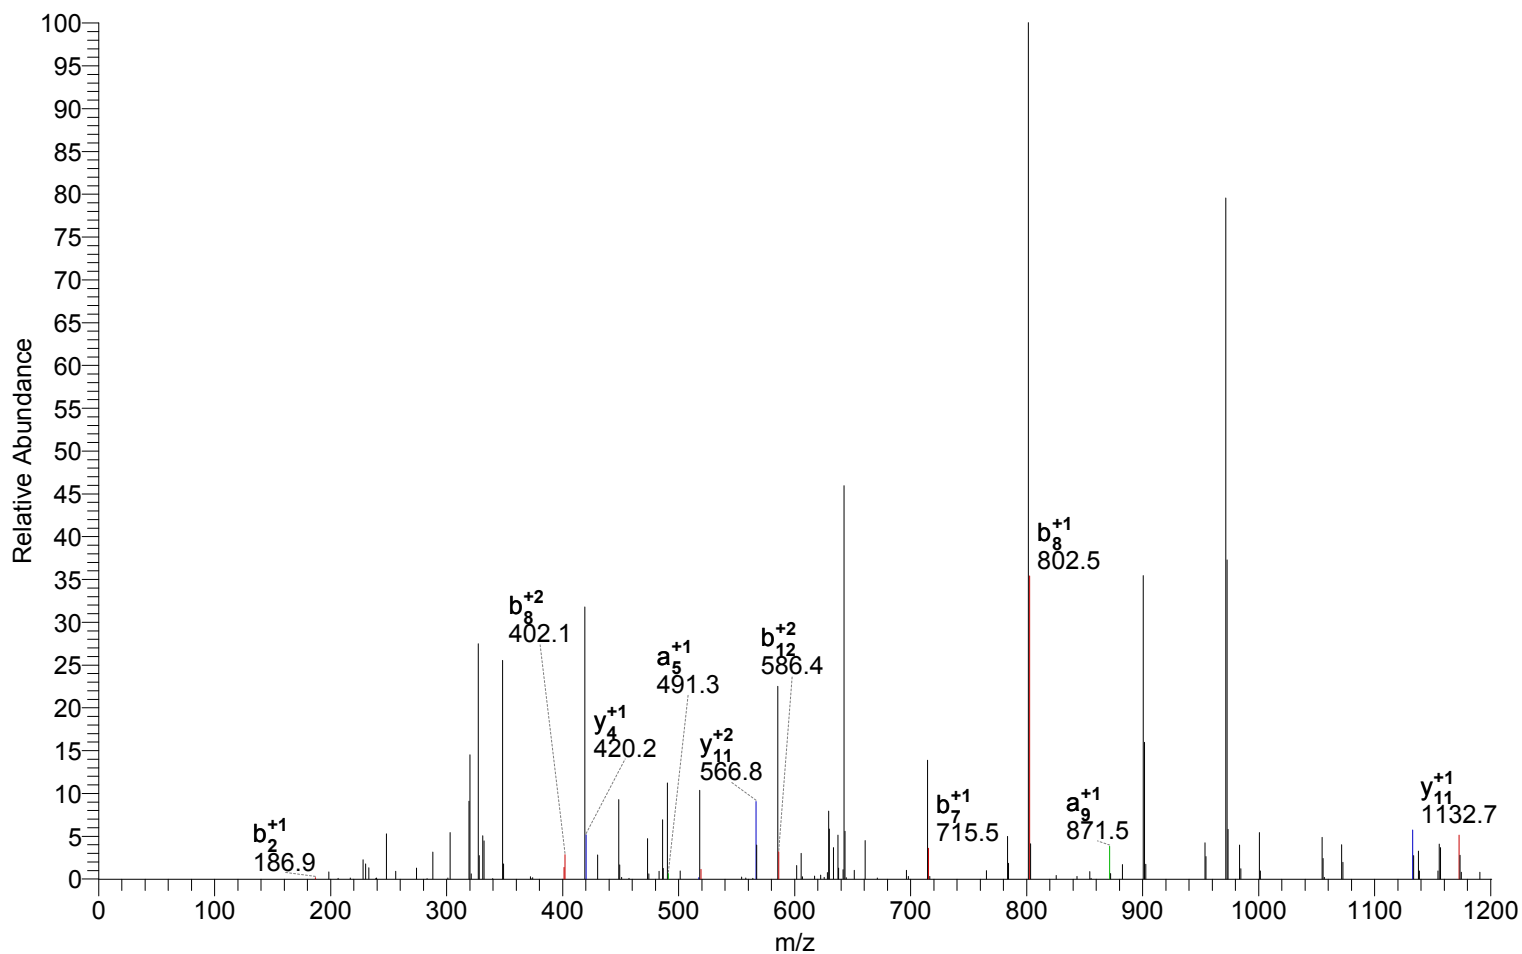

---

| Reference                          |                   |         |   | P   | Score | Coverage | Accession |     |       |       |
|------------------------------------|-------------------|---------|---|-----|-------|----------|-----------|-----|-------|-------|
| Scan(s)                            | Sequence          | MH+     | z | P   | XC    | DeltaCn  | Sp        | RSp | Ions  | Count |
| IPI:IPI00879134.1 TREMBL:B3KQW0 EN |                   |         |   | 1   | 8.1   | 0.0      | 0         |     |       |       |
| 19287468 - 1                       | K.SVNGCVPSPSDAK.S | 1318.59 | 2 | 0.2 | 2.111 | 0.618    | 149.8     | 3   | 10/36 | 1     |

---

1 of 1 peptide matches reported, 0 removed due to filtering

DTA for scans: 19287468-1  
Precursor ion: 659.79  
Mass type: mono  
Mod's: (M\* +15.99492) C=161.01468

Ion series for charge: +1

| AA | A ions        | B ions         | B* ions | Bo ions | C ions | Y ions         | Y* ions | Yo ions | Z ions |
|----|---------------|----------------|---------|---------|--------|----------------|---------|---------|--------|
| S  | 60.04         | 88.04          |         |         |        |                |         |         |        |
| V  | 159.11        | <b>187.11</b>  |         |         |        | 1231.56        |         |         |        |
| N  | 273.16        | 301.15         |         |         |        | <b>1132.49</b> |         |         |        |
| G  | 330.18        | 358.17         |         |         |        | 1018.45        |         |         |        |
| C  | <b>491.19</b> | <b>519.19</b>  |         |         |        | 961.43         |         |         |        |
| V  | 590.26        | 618.26         |         |         |        | 800.41         |         |         |        |
| P  | 687.31        | <b>715.31</b>  |         |         |        | 701.35         |         |         |        |
| S  | 774.35        | <b>802.34</b>  |         |         |        | 604.29         |         |         |        |
| P  | <b>871.40</b> | 899.39         |         |         |        | <b>517.26</b>  |         |         |        |
| S  | 958.43        | 986.42         |         |         |        | <b>420.21</b>  |         |         |        |
| D  | 1073.46       | 1101.45        |         |         |        | 333.18         |         |         |        |
| A  | 1144.49       | <b>1172.49</b> |         |         |        | 218.15         |         |         |        |
| K  |               |                |         |         |        | 147.11         |         |         |        |

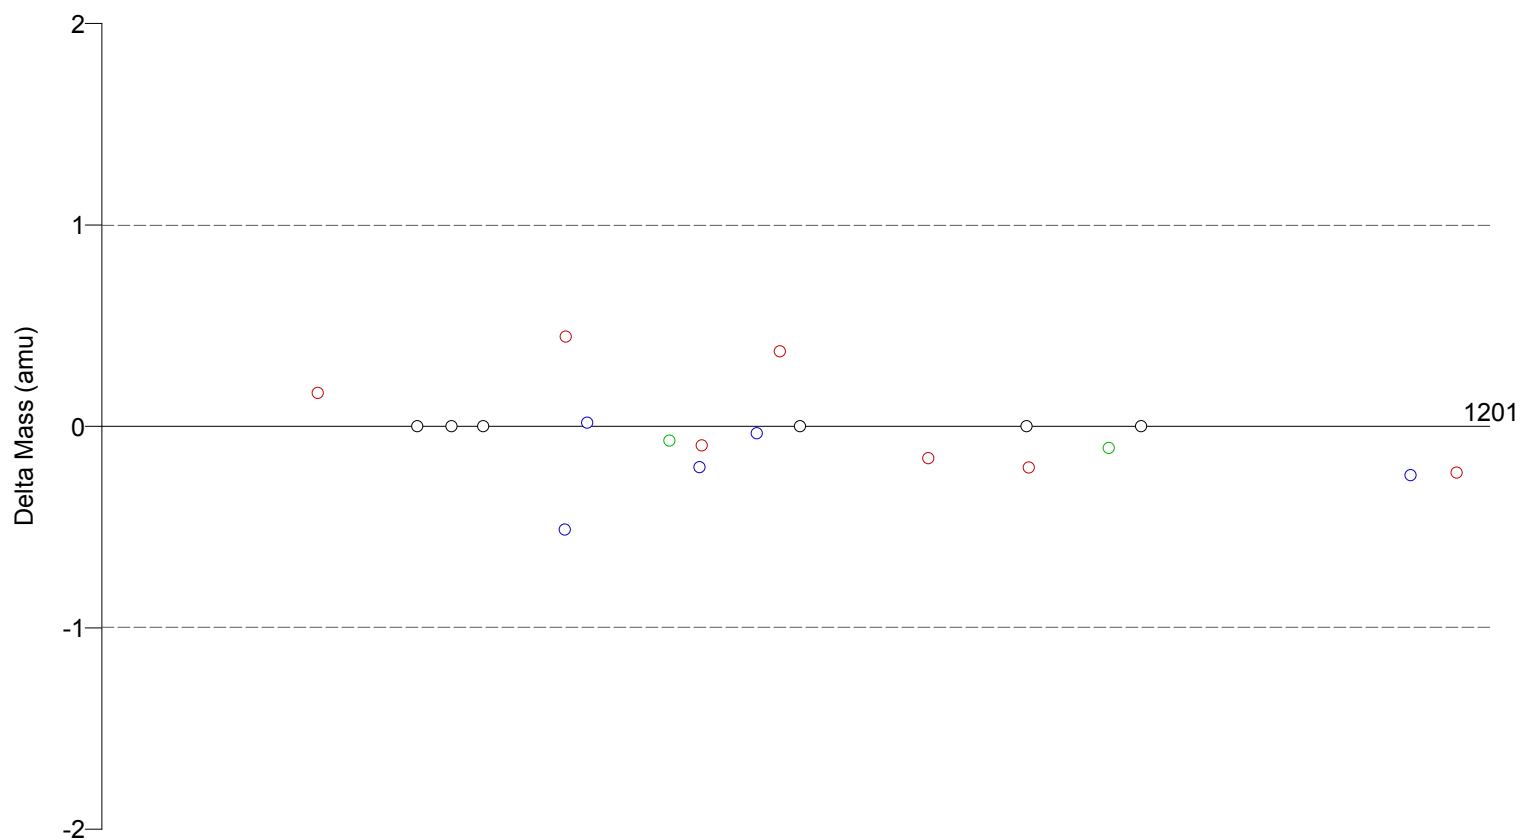

#19287468-1 NL: 2.05E5



---

| Reference                             |                          |        |   | P   | Score | Coverage | Accession |     |       |       |  |
|---------------------------------------|--------------------------|--------|---|-----|-------|----------|-----------|-----|-------|-------|--|
| Scan(s)                               | Sequence                 | MH+    | z | P   | XC    | DeltaCn  | Sp        | RSp | Ions  | Count |  |
| IPI:IPI00936423.1 REFSEQ:XP_002343325 | Tax_Id=9606 Gene_Symbol= |        | 1 |     | 8.1   | 0.0      | 0         |     |       |       |  |
| 19287468 - 1                          | K.FLGLIM*GR.G            | 922.52 | 2 | 0.3 | 1.924 | 0.405    | 193.5     | 3   | 10/21 | 1     |  |

1 of 1 peptide matches reported, 0 removed due to filtering

DTA for scans: 19287468-1  
Precursor ion: 461.76  
Mass type: mono  
Mod's: (M\* +15.99492) C=161.01468

Ion series for charge: +1

| AA | A ions        | B ions        | B* ions | Bo ions | C ions | Y ions        | Y* ions | Yo ions | Z ions |
|----|---------------|---------------|---------|---------|--------|---------------|---------|---------|--------|
| F  | <b>120.08</b> | 148.08        |         |         |        |               |         |         |        |
| L  | 233.16        | <b>261.16</b> |         |         |        | <b>775.45</b> |         |         |        |
| G  | 290.19        | <b>318.18</b> |         |         |        | 662.37        |         |         |        |
| L  | 403.27        | <b>431.27</b> |         |         |        | <b>605.34</b> |         |         |        |
| I  | 516.35        | <b>544.35</b> |         |         |        | <b>492.26</b> |         |         |        |
| M* | 663.39        | 691.38        |         |         |        | <b>379.18</b> |         |         |        |
| G  | 720.41        | 748.41        |         |         |        | 232.14        |         |         |        |
| R  |               |               |         |         |        | <b>175.12</b> |         |         |        |



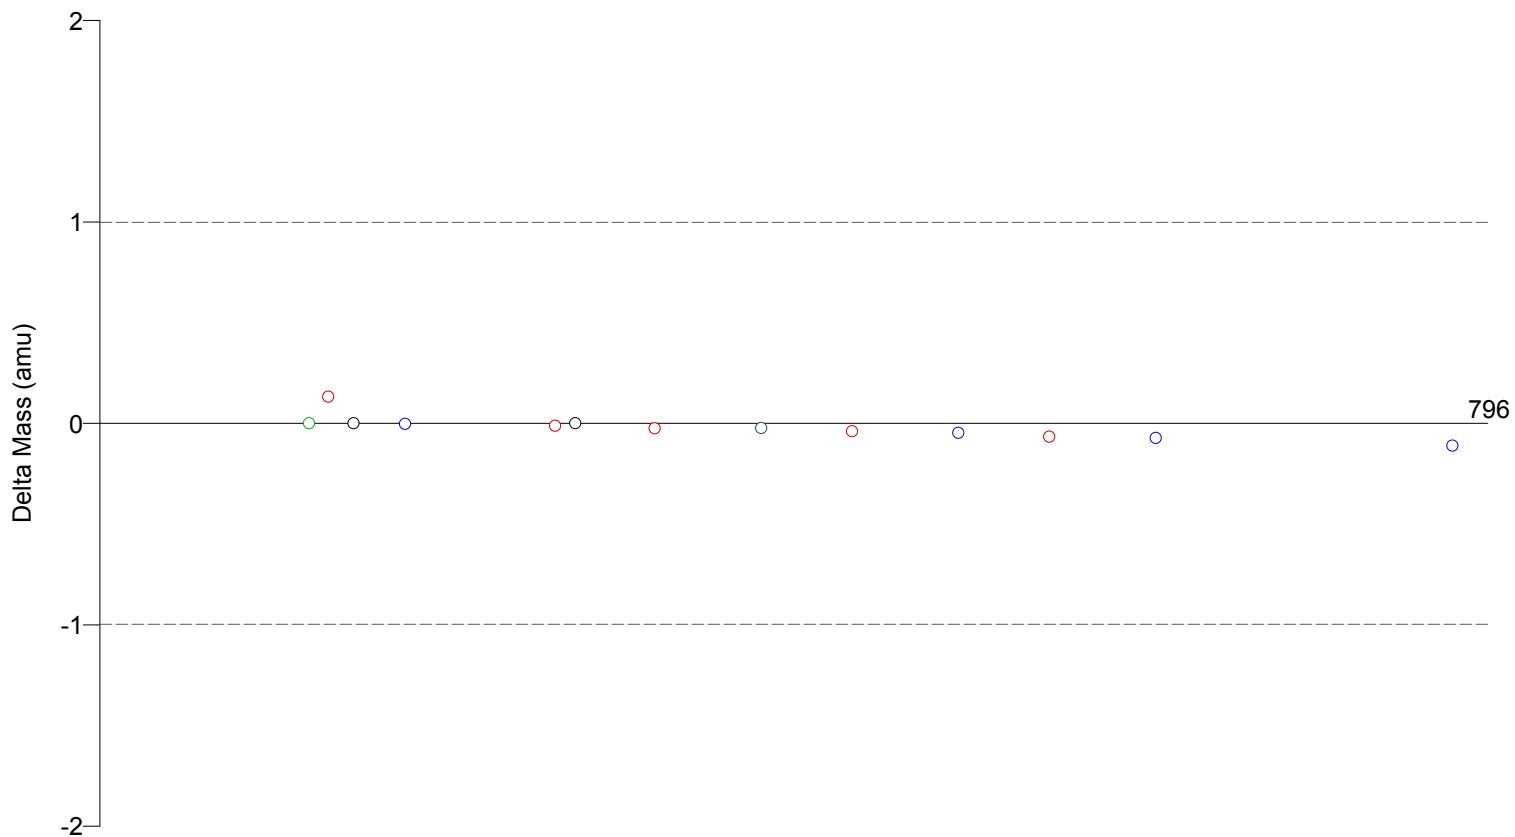

#19287468-1 NL: 1.73E5

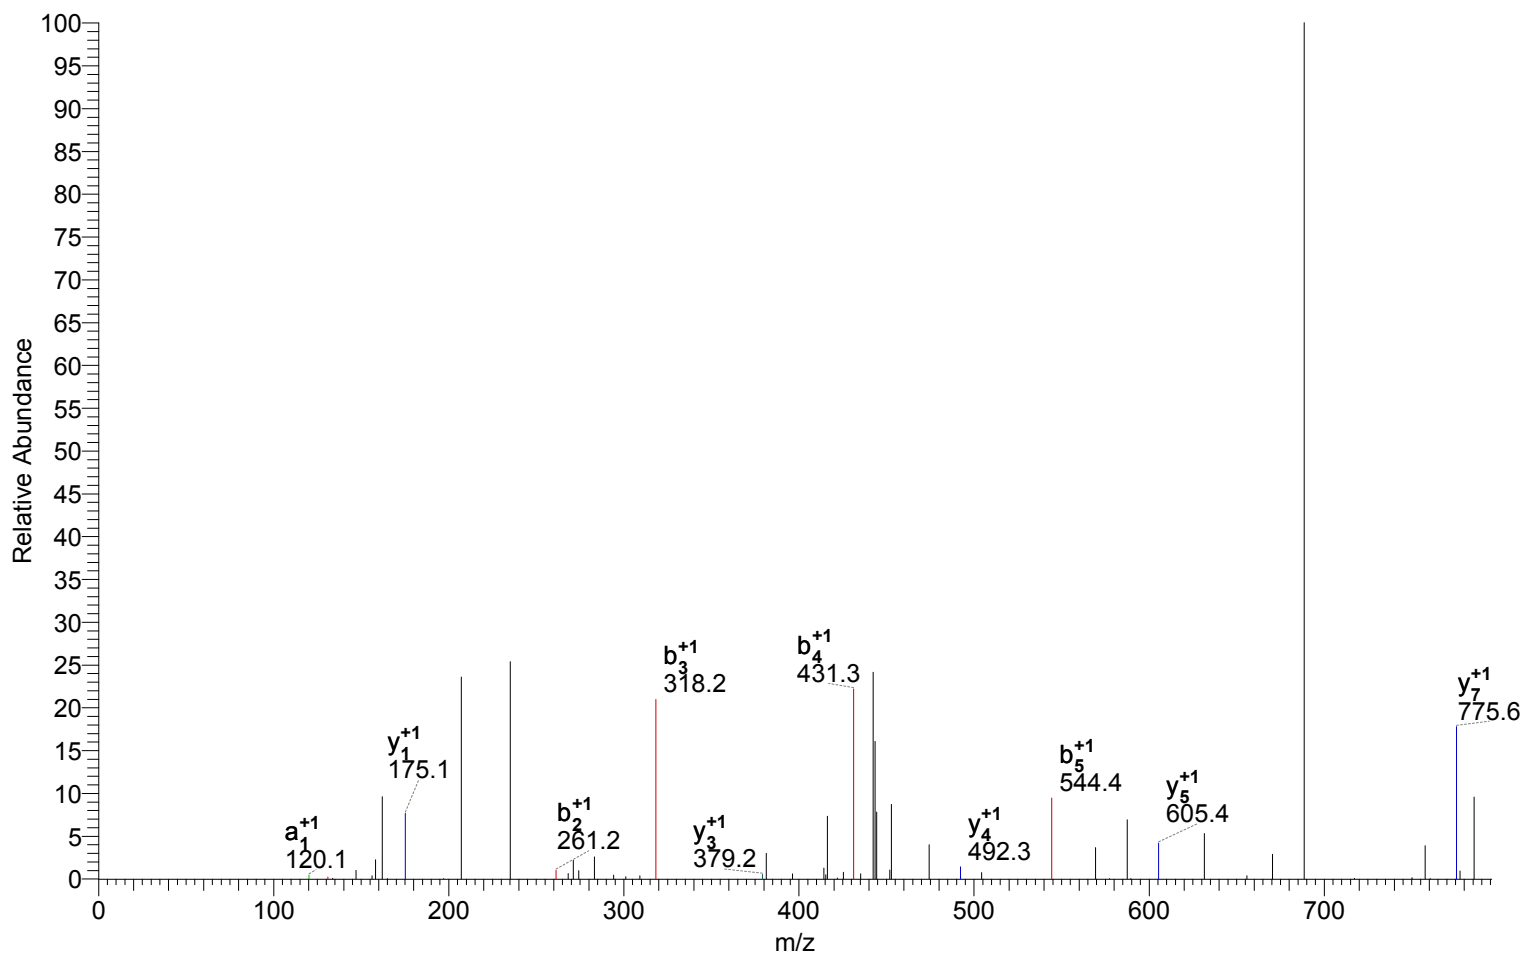

---

| Reference                          |               |        |   | P   | Score | Coverage | Accession |     |       |       |
|------------------------------------|---------------|--------|---|-----|-------|----------|-----------|-----|-------|-------|
| Scan(s)                            | Sequence      | MH+    | z | P   | XC    | DeltaCn  | Sp        | RSp | Ions  | Count |
| IPI:IPI00937991.1 REFSEQ:XP_002347 |               |        |   | 1   | 8.1   | 0.0      | 0         |     |       |       |
| 19287468 - 1                       | K.FLGLIM*GR.G | 922.52 | 2 | 0.3 | 1.924 | 0.405    | 193.5     | 3   | 10/21 | 1     |

---

1 of 1 peptide matches reported, 0 removed due to filtering

DTA for scans: 19287468-1  
Precursor ion: 461.76  
Mass type: mono  
Mod's: (M\* +15.99492) C=161.01468

Ion series for charge: +1

| AA | A ions        | B ions        | B* ions | Bo ions | C ions | Y ions        | Y* ions | Yo ions | Z ions |
|----|---------------|---------------|---------|---------|--------|---------------|---------|---------|--------|
| F  | <b>120.08</b> | 148.08        |         |         |        |               |         |         |        |
| L  | 233.16        | <b>261.16</b> |         |         |        | <b>775.45</b> |         |         |        |
| G  | 290.19        | <b>318.18</b> |         |         |        | 662.37        |         |         |        |
| L  | 403.27        | <b>431.27</b> |         |         |        | <b>605.34</b> |         |         |        |
| I  | 516.35        | <b>544.35</b> |         |         |        | <b>492.26</b> |         |         |        |
| M* | 663.39        | 691.38        |         |         |        | <b>379.18</b> |         |         |        |
| G  | 720.41        | 748.41        |         |         |        | 232.14        |         |         |        |
| R  |               |               |         |         |        | <b>175.12</b> |         |         |        |

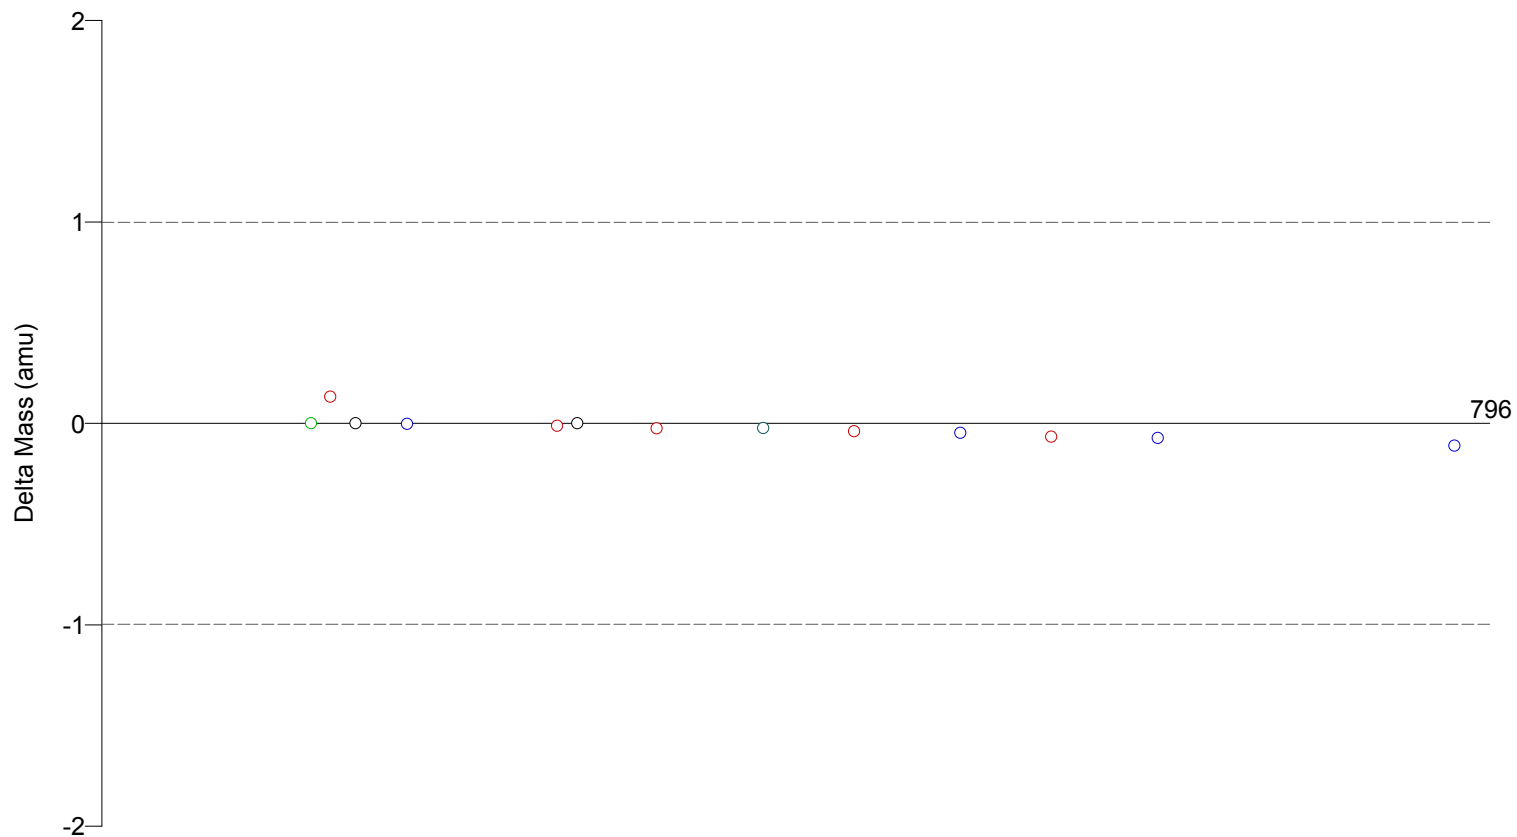

#19287468-1 NL: 1.73E5



---

| Reference                                                      |          |         |   | P | Score | Coverage | Accession |     |      |       |
|----------------------------------------------------------------|----------|---------|---|---|-------|----------|-----------|-----|------|-------|
| Scan(s)                                                        | Sequence | MH+     | z | P | XC    | DeltaCn  | Sp        | RSp | Ions | Count |
| IPI:IPI00893555.1 VEGA:OTTHUMP00000201682 Tax_Id=9606 Gene_Sym |          |         |   | 1 | 8.1   | 0.0      |           | 0   |      |       |
| 19287468 - 1 R.MFVSTVWTR.M                                     |          | 1126.57 | 2 | 1 | 1.265 | 0.427    | 69.9      | 27  | 5/24 |       |

---

1 of 1 peptide matches reported, 0 removed due to filtering

DTA for scans: 19287468-1  
Precursor ion: 563.79  
Mass type: mono  
Mod's: (M\* +15.99492) C=161.01468

Ion series for charge: +1

| AA | A ions        | B ions        | B* ions | Bo ions | C ions | Y ions        | Y* ions | Yo ions | Z ions |
|----|---------------|---------------|---------|---------|--------|---------------|---------|---------|--------|
| M  | 104.05        | 132.05        |         |         |        |               |         |         |        |
| F  | <b>251.12</b> | 279.12        |         |         |        | 995.53        |         |         |        |
| V  | <b>350.19</b> | 378.18        |         |         |        | 848.46        |         |         |        |
| S  | 437.22        | <b>465.22</b> |         |         |        | 749.39        |         |         |        |
| T  | 538.27        | 566.26        |         |         |        | <b>662.36</b> |         |         |        |
| V  | 637.34        | 665.33        |         |         |        | 561.31        |         |         |        |
| W  | 823.42        | 851.41        |         |         |        | 462.25        |         |         |        |
| T  | 924.46        | 952.46        |         |         |        | 276.17        |         |         |        |
| R  |               |               |         |         |        | <b>175.12</b> |         |         |        |

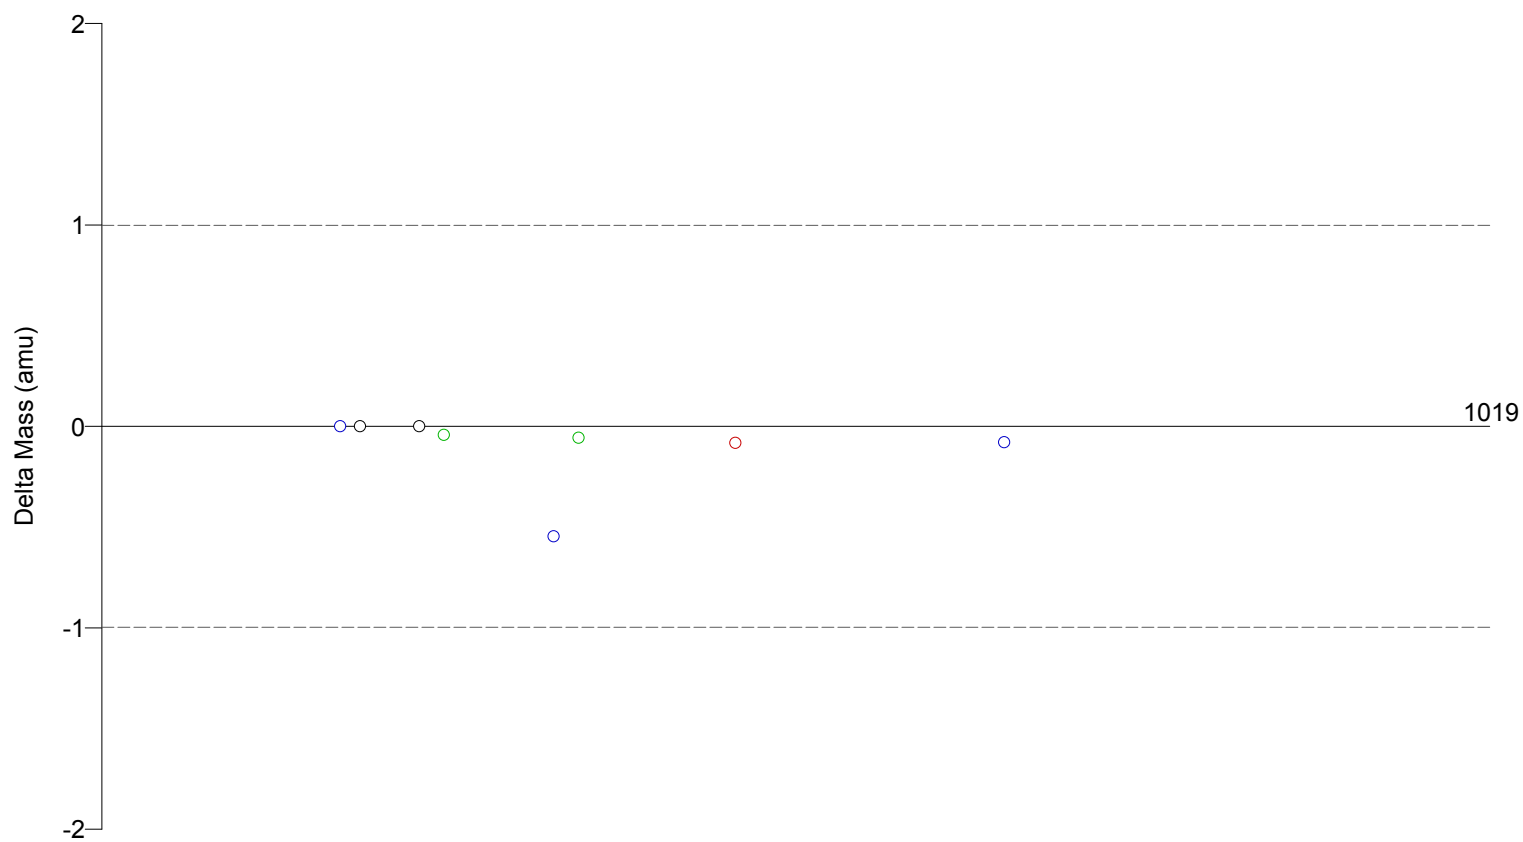

#19287468-1 NL: 7.10E5

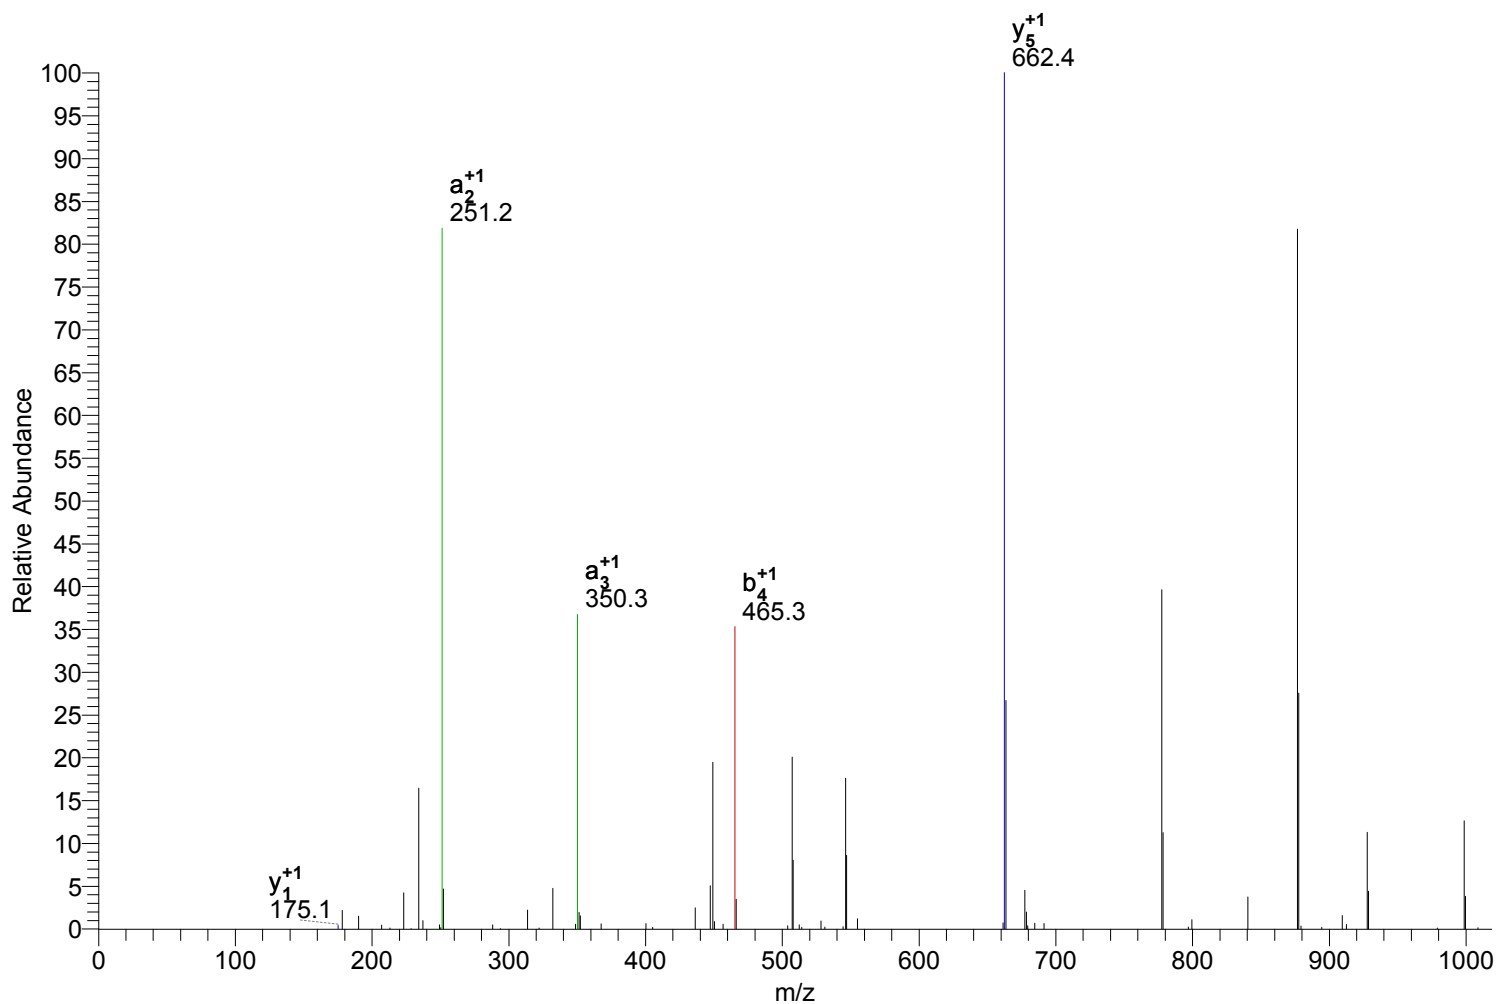

---

| Reference                                                     |          |         |   | P   | Score | Coverage | Accession |     |       |       |
|---------------------------------------------------------------|----------|---------|---|-----|-------|----------|-----------|-----|-------|-------|
| Scan(s)                                                       | Sequence | MH+     | z | P   | XC    | DeltaCn  | Sp        | RSp | Ions  | Count |
| IPI:IPI00328929.3 SWISS-PROT:Q86VM9-1 ENSEMBL:ENSP00000301011 |          |         |   | 1   | 8.1   | 0.0      | 0         |     |       |       |
| 2118291816 - K.LTLLNKAADK.G                                   |          | 1086.65 | 2 | 0.4 | 2.083 | 0.466    | 185.2     | 3   | 10/27 | 2     |

---

1 of 1 peptide matches reported, 0 removed due to filtering



DTA for scans: 2118291816-26226248  
Precursor ion: 543.82  
Mass type: mono  
Mod's: (M\* +15.99492) C=161.01468

Ion series for charge: +1

| AA | A ions        | B ions        | B* ions | Bo ions | C ions | Y ions        | Y* ions | Yo ions | Z ions |
|----|---------------|---------------|---------|---------|--------|---------------|---------|---------|--------|
| L  | 86.10         | 114.09        |         |         |        |               |         |         |        |
| T  | <b>187.14</b> | <b>215.14</b> |         |         |        | <b>973.57</b> |         |         |        |
| L  | 300.23        | 328.22        |         |         |        | <b>872.52</b> |         |         |        |
| L  | 413.31        | 441.31        |         |         |        | 759.44        |         |         |        |
| N  | <b>527.36</b> | <b>555.35</b> |         |         |        | <b>646.35</b> |         |         |        |
| K  | 655.45        | 683.45        |         |         |        | <b>532.31</b> |         |         |        |
| A  | <b>726.49</b> | 754.48        |         |         |        | 404.21        |         |         |        |
| A  | 797.52        | 825.52        |         |         |        | 333.18        |         |         |        |
| D  | 912.55        | <b>940.55</b> |         |         |        | 262.14        |         |         |        |
| K  |               |               |         |         |        | 147.11        |         |         |        |

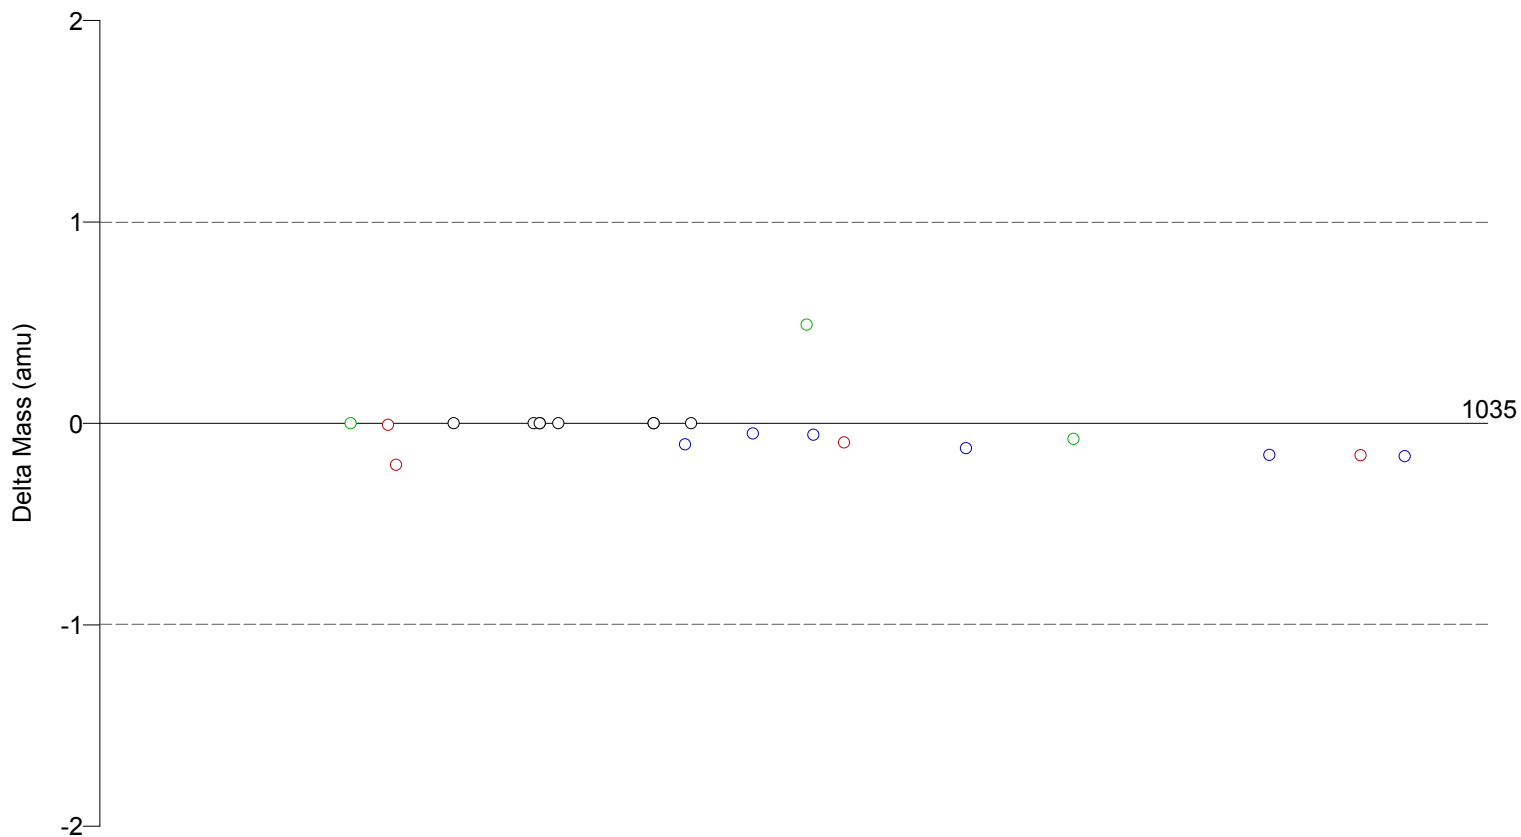

#2118291816-26226248 NL: 1.21E5

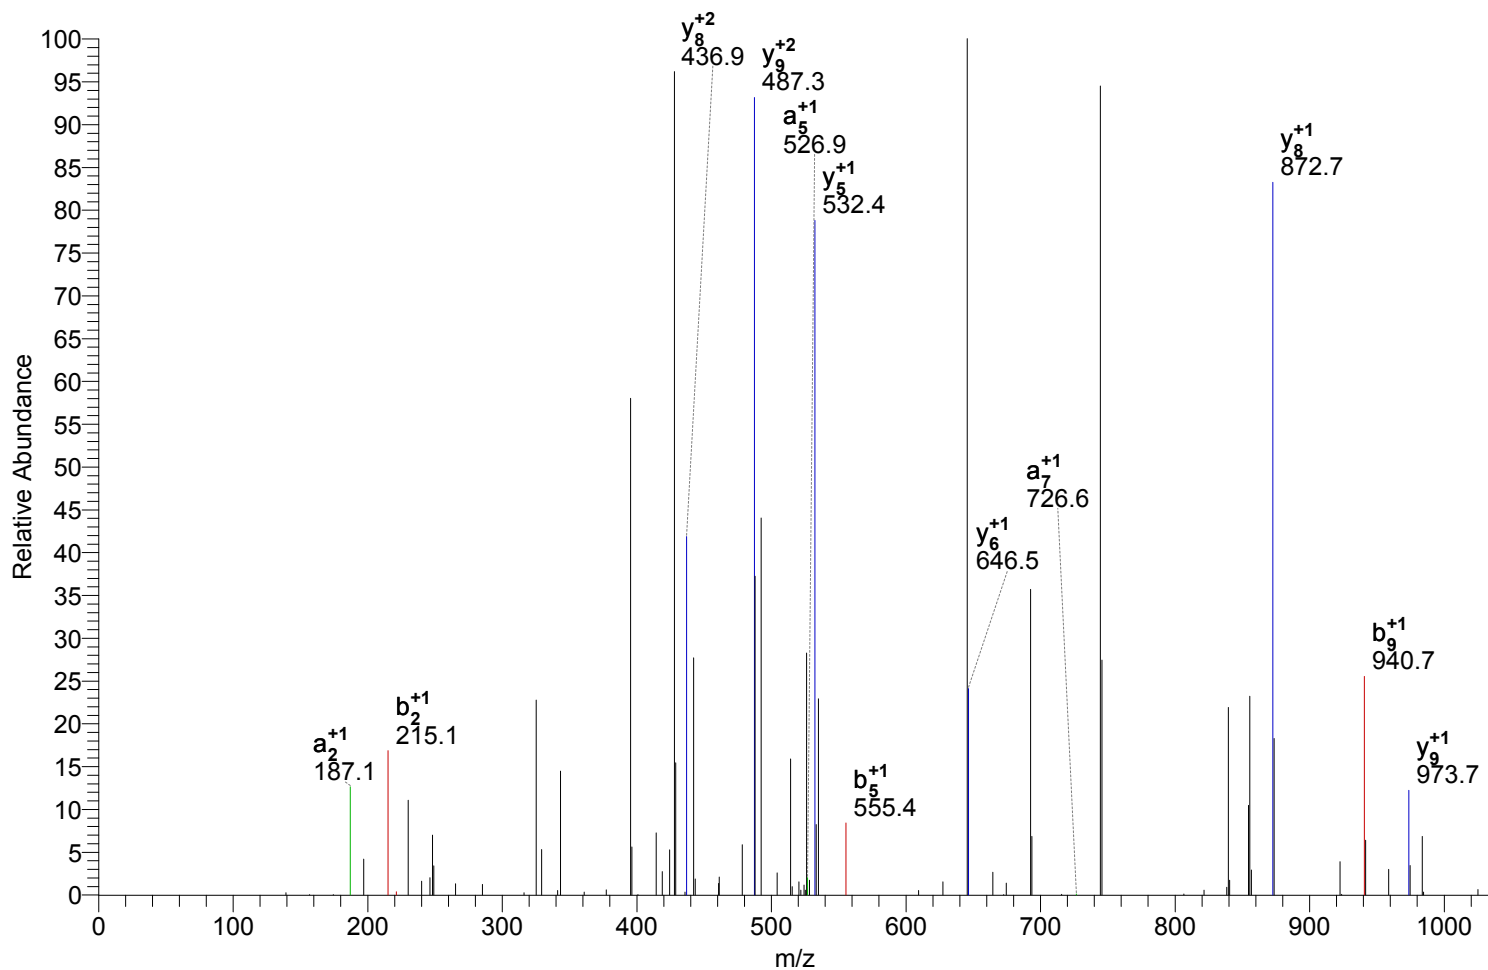

---

| Reference                          |          |         |   | P   | Score | Coverage | Accession |     |       |       |
|------------------------------------|----------|---------|---|-----|-------|----------|-----------|-----|-------|-------|
| Scan(s)                            | Sequence | MH+     | z | P   | XC    | DeltaCn  | Sp        | RSp | Ions  | Count |
| IPI:IPI00642285.1 TREMBL:B3KRL4 VE |          |         |   | 1   | 8.1   | 0.0      | 0         |     |       |       |
| 2118291816 - K.LTLLNKAADK.G        |          | 1086.65 | 2 | 0.4 | 2.083 | 0.466    | 185.2     | 3   | 10/27 | 2     |

---

1 of 1 peptide matches reported, 0 removed due to filtering

DTA for scans: 2118291816-26226248  
Precursor ion: 543.82  
Mass type: mono  
Mod's: (M\* +15.99492) C=161.01468

Ion series for charge: +1

| AA | A ions        | B ions        | B* ions | Bo ions | C ions | Y ions        | Y* ions | Yo ions | Z ions |
|----|---------------|---------------|---------|---------|--------|---------------|---------|---------|--------|
| L  | 86.10         | 114.09        |         |         |        |               |         |         |        |
| T  | <b>187.14</b> | <b>215.14</b> |         |         |        | <b>973.57</b> |         |         |        |
| L  | 300.23        | 328.22        |         |         |        | <b>872.52</b> |         |         |        |
| L  | 413.31        | 441.31        |         |         |        | 759.44        |         |         |        |
| N  | <b>527.36</b> | <b>555.35</b> |         |         |        | <b>646.35</b> |         |         |        |
| K  | 655.45        | 683.45        |         |         |        | <b>532.31</b> |         |         |        |
| A  | <b>726.49</b> | 754.48        |         |         |        | 404.21        |         |         |        |
| A  | 797.52        | 825.52        |         |         |        | 333.18        |         |         |        |
| D  | 912.55        | <b>940.55</b> |         |         |        | 262.14        |         |         |        |
| K  |               |               |         |         |        | 147.11        |         |         |        |



#2118291816-26226248 NL: 1.21E5



---

| Reference                          |          |         |   | P   | Score | Coverage | Accession |     |       |       |
|------------------------------------|----------|---------|---|-----|-------|----------|-----------|-----|-------|-------|
| Scan(s)                            | Sequence | MH+     | z | P   | XC    | DeltaCn  | Sp        | RSp | Ions  | Count |
| IPI:IPI00908725.1 TREMBL:B4DTK7 Ta |          |         |   | 1   | 8.1   | 0.0      | 0         |     |       |       |
| 2118291816 - K.LTLLNKAADK.G        |          | 1086.65 | 2 | 0.4 | 2.083 | 0.466    | 185.2     | 3   | 10/27 | 2     |

1 of 1 peptide matches reported, 0 removed due to filtering

DTA for scans: 2118291816-26226248  
Precursor ion: 543.82  
Mass type: mono  
Mod's: (M\* +15.99492) C=161.01468

Ion series for charge: +1

| AA | A ions        | B ions        | B* ions | Bo ions | C ions | Y ions        | Y* ions | Yo ions | Z ions |
|----|---------------|---------------|---------|---------|--------|---------------|---------|---------|--------|
| L  | 86.10         | 114.09        |         |         |        |               |         |         |        |
| T  | <b>187.14</b> | <b>215.14</b> |         |         |        | <b>973.57</b> |         |         |        |
| L  | 300.23        | 328.22        |         |         |        | <b>872.52</b> |         |         |        |
| L  | 413.31        | 441.31        |         |         |        | 759.44        |         |         |        |
| N  | <b>527.36</b> | <b>555.35</b> |         |         |        | <b>646.35</b> |         |         |        |
| K  | 655.45        | 683.45        |         |         |        | <b>532.31</b> |         |         |        |
| A  | <b>726.49</b> | 754.48        |         |         |        | 404.21        |         |         |        |
| A  | 797.52        | 825.52        |         |         |        | 333.18        |         |         |        |
| D  | 912.55        | <b>940.55</b> |         |         |        | 262.14        |         |         |        |
| K  |               |               |         |         |        | 147.11        |         |         |        |



#2118291816-26226248 NL: 1.21E5





---

| Reference                                          |             |         |   | P | Score | Coverage | Accession |     |      |       |
|----------------------------------------------------|-------------|---------|---|---|-------|----------|-----------|-----|------|-------|
| Scan(s)                                            | Sequence    | MH+     | z | P | XC    | DeltaCn  | Sp        | RSp | Ions | Count |
| IPI:IPI00065529.1 TREMBL:Q96MJ9 H-INV:HIT000013428 | Tax_Id=9606 |         | 1 |   | 8.1   | 0.0      | 0         |     |      |       |
| 2118291816 - R.GDLGASGPAETR.G                      |             | 1217.58 | 2 | 1 | 1.209 | 0.711    | 107.4     | 3   | 8/36 |       |

1 of 1 peptide matches reported, 0 removed due to filtering

DTA for scans: 2118291816-26226248  
Precursor ion: 609.29  
Mass type: mono  
Mod's: (M\* +15.99492) C=161.01468

Ion series for charge: +1

| AA | A ions         | B ions        | B* ions | Bo ions | C ions | Y ions        | Y* ions | Yo ions | Z ions |
|----|----------------|---------------|---------|---------|--------|---------------|---------|---------|--------|
| G  | 30.03          | 58.03         |         |         |        |               |         |         |        |
| D  | 145.06         | 173.06        |         |         |        | 1160.55       |         |         |        |
| L  | 258.14         | 286.14        |         |         |        | 1045.53       |         |         |        |
| S  | 345.18         | <b>373.17</b> |         |         |        | 932.44        |         |         |        |
| G  | 402.20         | 430.19        |         |         |        | 845.41        |         |         |        |
| A  | 473.24         | 501.23        |         |         |        | 788.39        |         |         |        |
| S  | 560.27         | 588.26        |         |         |        | 717.35        |         |         |        |
| G  | 617.29         | 645.28        |         |         |        | 630.32        |         |         |        |
| P  | <b>714.34</b>  | 742.34        |         |         |        | <b>573.30</b> |         |         |        |
| A  | <b>785.38</b>  | 813.37        |         |         |        | <b>476.25</b> |         |         |        |
| E  | 914.42         | 942.42        |         |         |        | 405.21        |         |         |        |
| T  | <b>1015.47</b> | 1043.46       |         |         |        | 276.17        |         |         |        |
| R  |                |               |         |         |        | 175.12        |         |         |        |

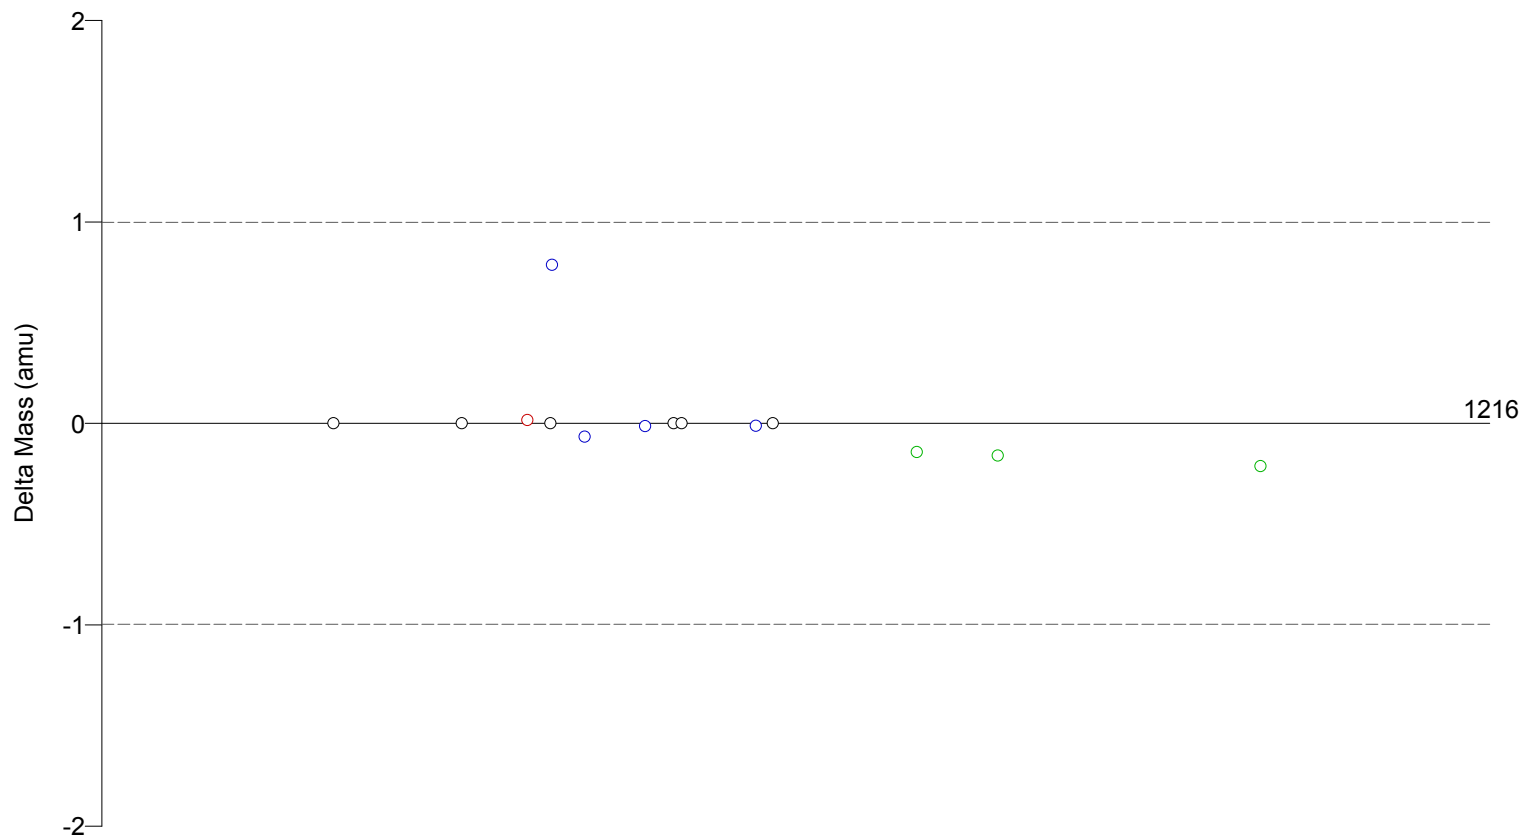

#2118291816-26226248 NL: 9.29E4

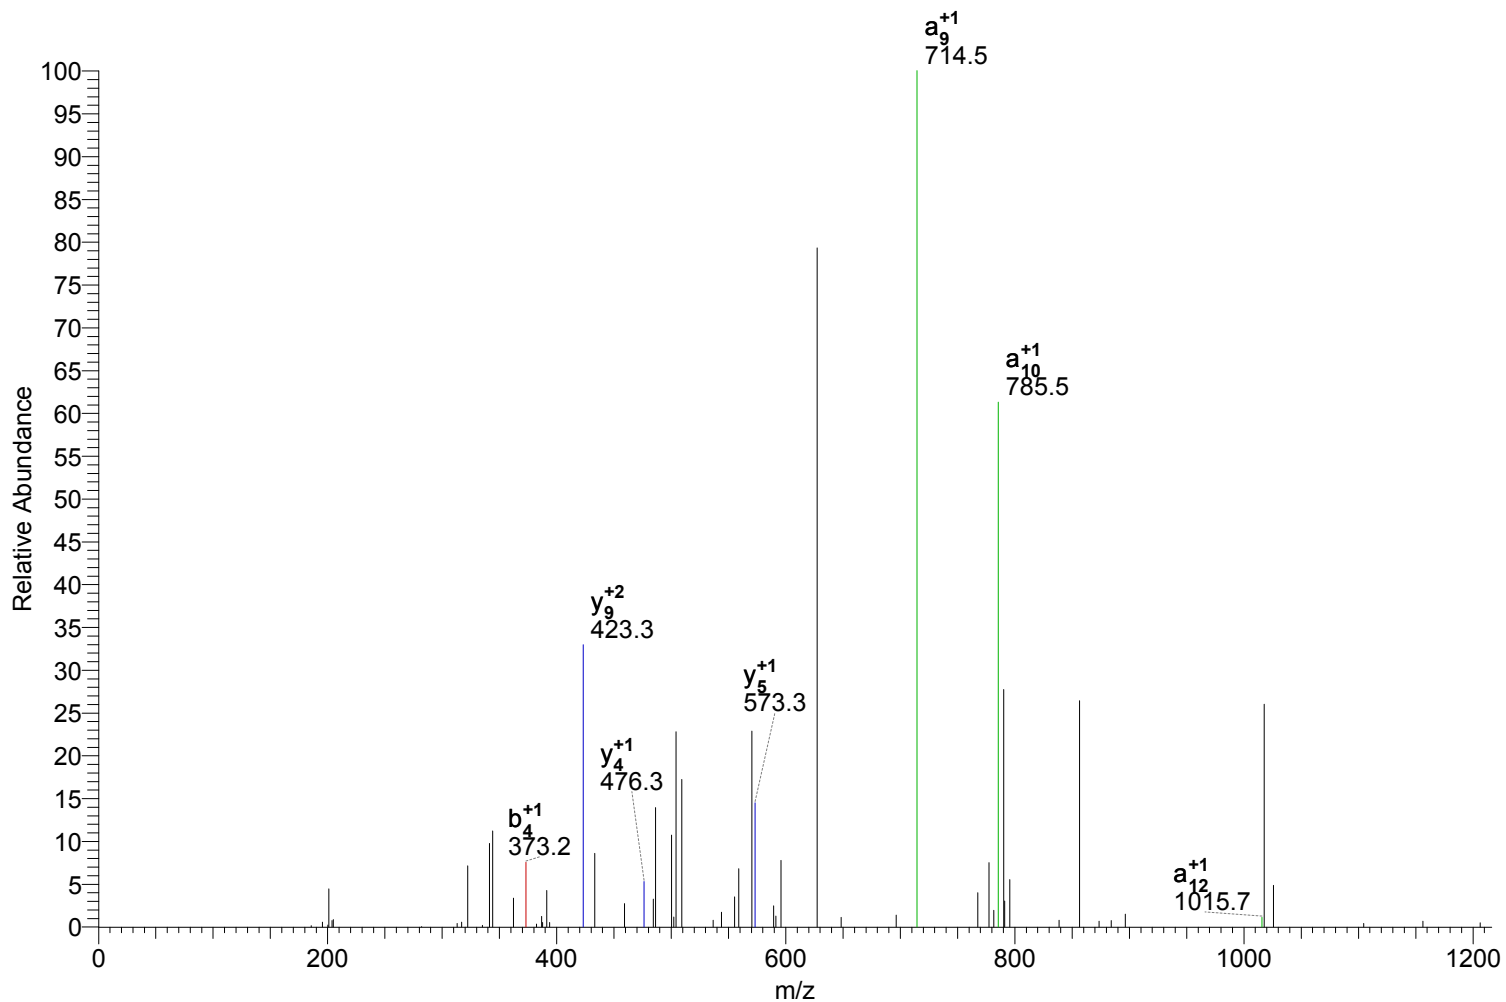

---

| Reference                                                      |          |        |   | P   | Score | Coverage | Accession |     |       |       |
|----------------------------------------------------------------|----------|--------|---|-----|-------|----------|-----------|-----|-------|-------|
| Scan(s)                                                        | Sequence | MH+    | z | P   | XC    | DeltaCn  | Sp        | RSp | Ions  | Count |
| IPI:IPI00384404.4 TREMBL:A2J1N6 Tax_Id=9606 Gene_Symbol=- Rheu |          |        |   | 1   | 10.1  | 0.0      | 0         |     |       |       |
| 19287468 - 1 K.GLEWVGR.I                                       |          | 816.44 | 2 | 0.4 | 2.817 | 0.203    | 839.1     | 1   | 13/18 | 8     |

1 of 1 peptide matches reported, 0 removed due to filtering

DTA for scans: 19287468-1  
Precursor ion: 408.72  
Mass type: mono  
Mod's: (M\* +15.99492) C=161.01468

Ion series for charge: +1

| AA | A ions        | B ions        | B* ions | Bo ions | C ions | Y ions        | Y* ions | Yo ions | Z ions |
|----|---------------|---------------|---------|---------|--------|---------------|---------|---------|--------|
| G  | 30.03         | 58.03         |         |         |        |               |         |         |        |
| L  | <b>143.12</b> | <b>171.11</b> |         |         |        | 759.41        |         |         |        |
| E  | 272.16        | <b>300.16</b> |         |         |        | <b>646.33</b> |         |         |        |
| W  | <b>458.24</b> | <b>486.23</b> |         |         |        | <b>517.29</b> |         |         |        |
| V  | 557.31        | <b>585.30</b> |         |         |        | <b>331.21</b> |         |         |        |
| G  | 614.33        | <b>642.32</b> |         |         |        | <b>232.14</b> |         |         |        |
| R  |               |               |         |         |        | <b>175.12</b> |         |         |        |

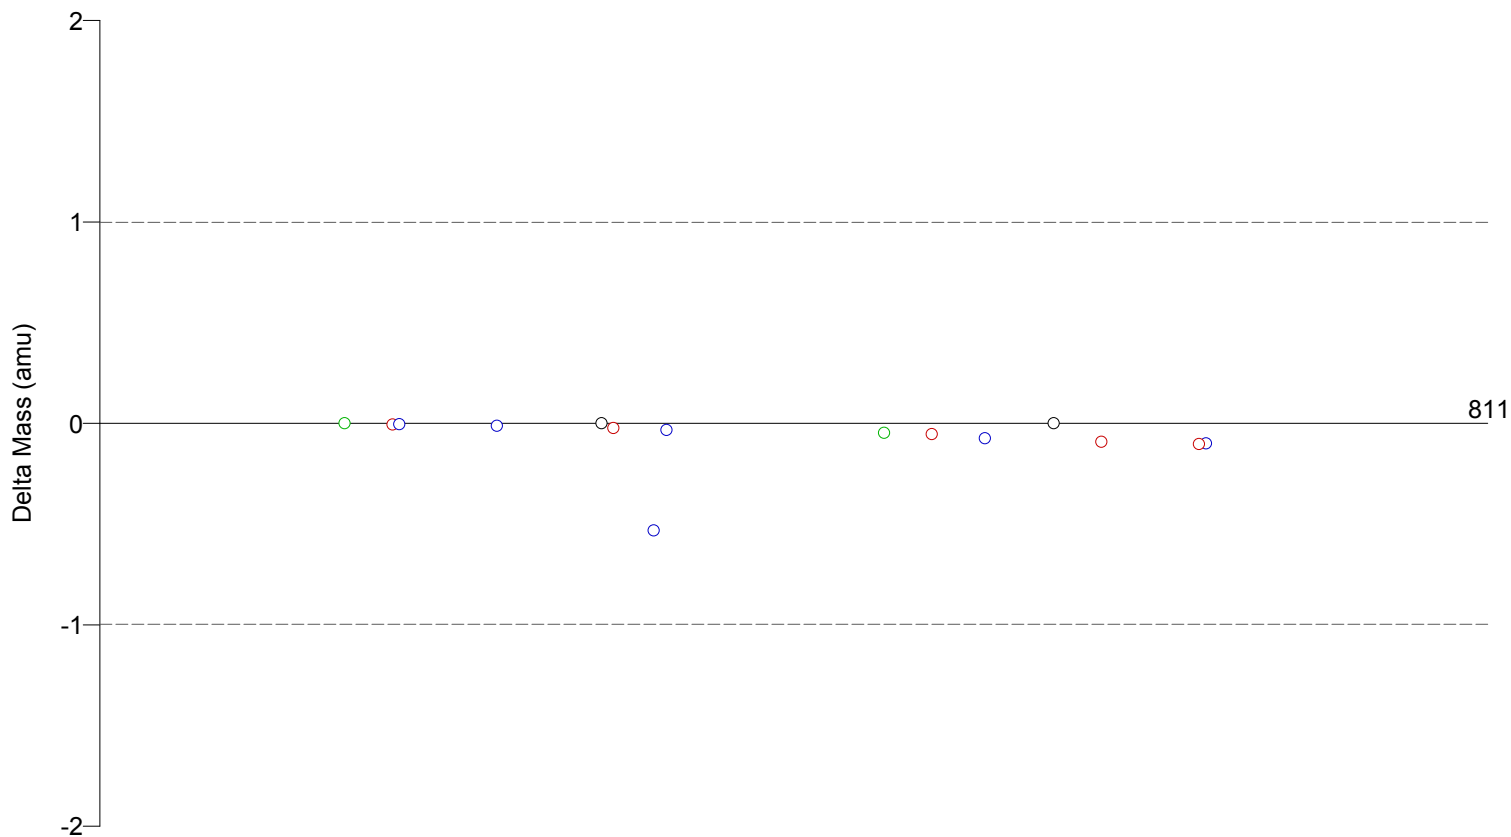

#19287468-1 NL: 1.30E5



---

| Reference                          |          |        |   | P   | Score | Coverage | Accession |     |       |       |
|------------------------------------|----------|--------|---|-----|-------|----------|-----------|-----|-------|-------|
| Scan(s)                            | Sequence | MH+    | z | P   | XC    | DeltaCn  | Sp        | RSp | Ions  | Count |
| IPI:IPI00783024.1 TREMBL:Q9UL88 Ta |          |        |   | 1   | 10.1  | 0.0      | 0         |     |       |       |
| 19287468 - 1 K.GLEWVGR.I           |          | 816.44 | 2 | 0.4 | 2.817 | 0.203    | 839.1     | 1   | 13/18 | 8     |

1 of 1 peptide matches reported, 0 removed due to filtering

DTA for scans: 19287468-1  
Precursor ion: 408.72  
Mass type: mono  
Mod's: (M\* +15.99492) C=161.01468

Ion series for charge: +1

| AA | A ions        | B ions        | B* ions | Bo ions | C ions | Y ions        | Y* ions | Yo ions | Z ions |
|----|---------------|---------------|---------|---------|--------|---------------|---------|---------|--------|
| G  | 30.03         | 58.03         |         |         |        |               |         |         |        |
| L  | <b>143.12</b> | <b>171.11</b> |         |         |        | 759.41        |         |         |        |
| E  | 272.16        | <b>300.16</b> |         |         |        | <b>646.33</b> |         |         |        |
| W  | <b>458.24</b> | <b>486.23</b> |         |         |        | <b>517.29</b> |         |         |        |
| V  | 557.31        | <b>585.30</b> |         |         |        | <b>331.21</b> |         |         |        |
| G  | 614.33        | <b>642.32</b> |         |         |        | <b>232.14</b> |         |         |        |
| R  |               |               |         |         |        | <b>175.12</b> |         |         |        |



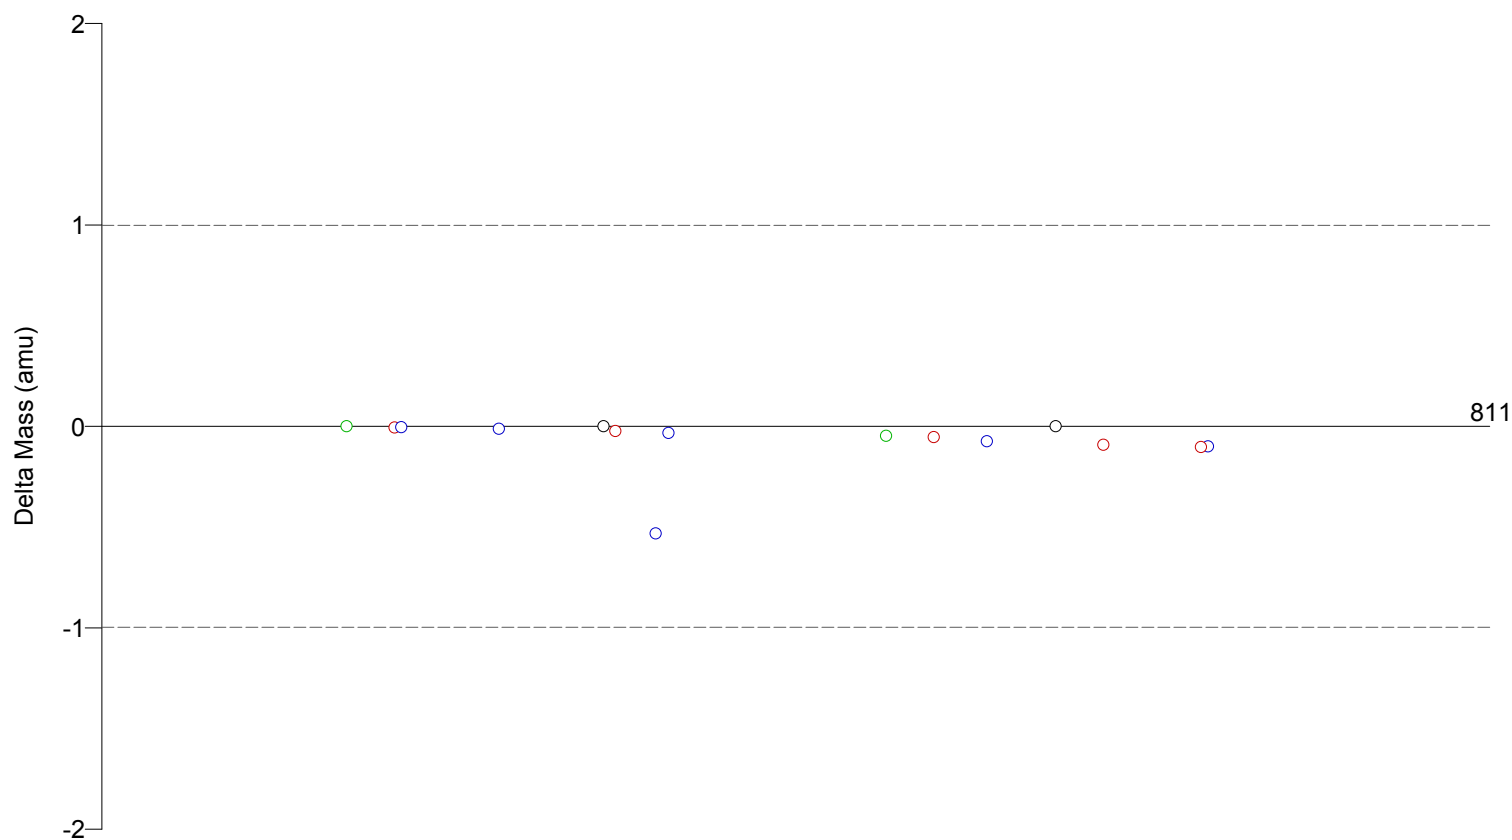

#19287468-1 NL: 1.30E5

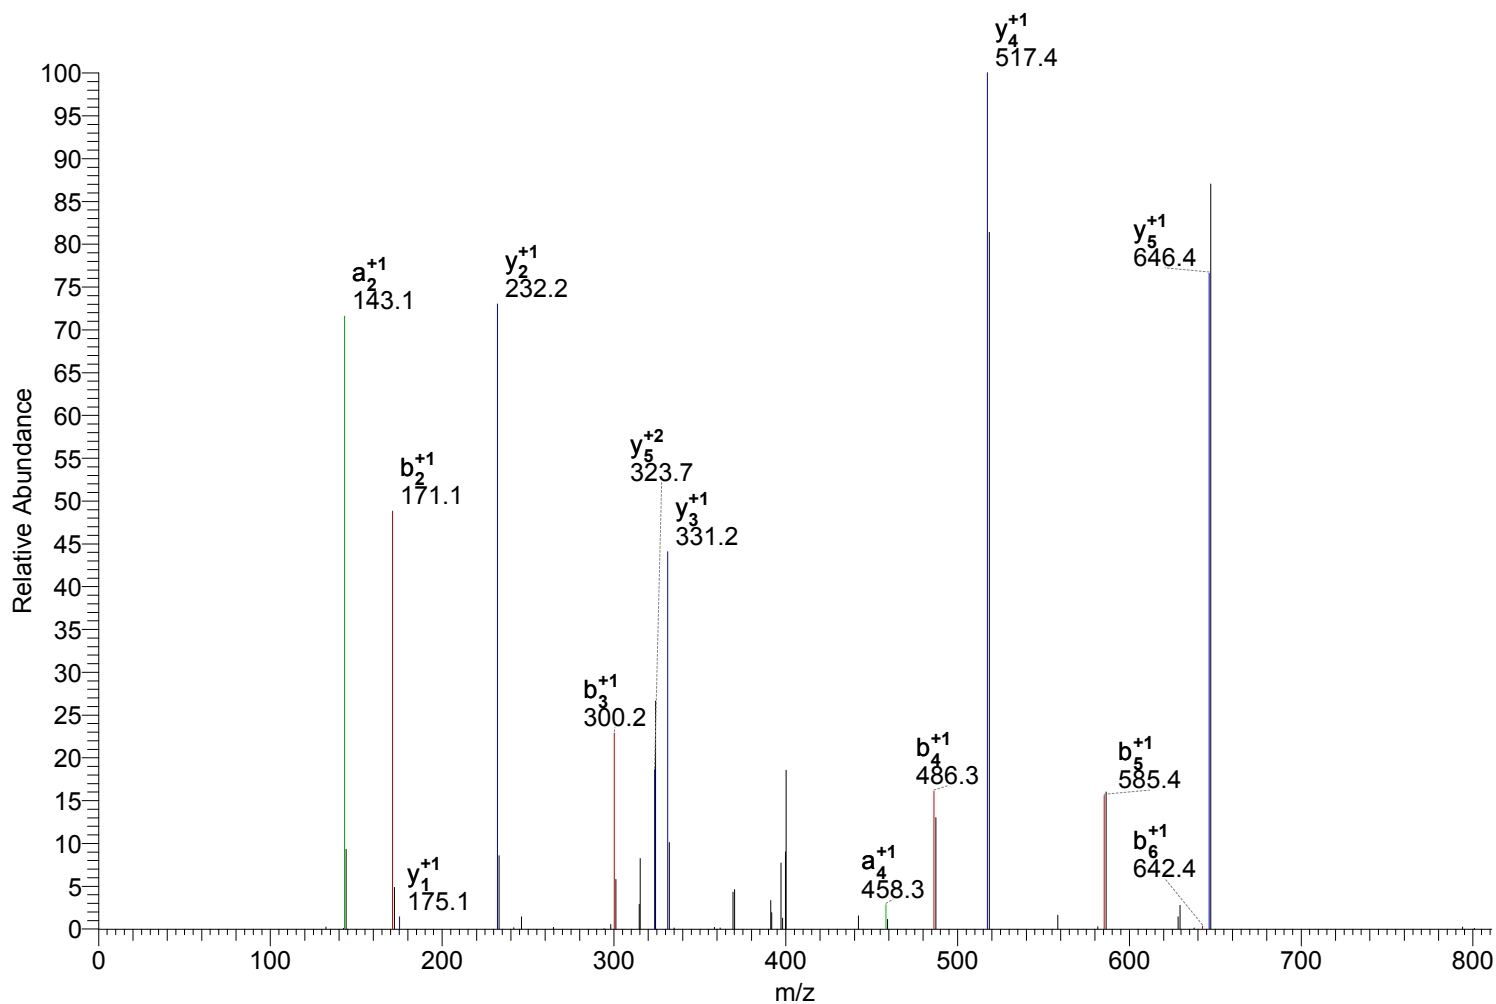

---

| Reference                          |             |        |   | P   | Score | Coverage | Accession |     |       |       |
|------------------------------------|-------------|--------|---|-----|-------|----------|-----------|-----|-------|-------|
| Scan(s)                            | Sequence    | MH+    | z | P   | XC    | DeltaCn  | Sp        | RSp | Ions  | Count |
| IPI:IPI00783184.1 TREMBL:Q0ZC10 Ta |             |        |   | 1   | 10.1  | 0.0      | 0         |     |       |       |
| 19287468 - 1                       | K.GLEWVGR.I | 816.44 | 2 | 0.4 | 2.817 | 0.203    | 839.1     | 1   | 13/18 | 8     |

1 of 1 peptide matches reported, 0 removed due to filtering

DTA for scans: 19287468-1  
Precursor ion: 408.72  
Mass type: mono  
Mod's: (M\* +15.99492) C=161.01468

Ion series for charge: +1

| AA | A ions        | B ions        | B* ions | Bo ions | C ions | Y ions        | Y* ions | Yo ions | Z ions |
|----|---------------|---------------|---------|---------|--------|---------------|---------|---------|--------|
| G  | 30.03         | 58.03         |         |         |        |               |         |         |        |
| L  | <b>143.12</b> | <b>171.11</b> |         |         |        | 759.41        |         |         |        |
| E  | 272.16        | <b>300.16</b> |         |         |        | <b>646.33</b> |         |         |        |
| W  | <b>458.24</b> | <b>486.23</b> |         |         |        | <b>517.29</b> |         |         |        |
| V  | 557.31        | <b>585.30</b> |         |         |        | <b>331.21</b> |         |         |        |
| G  | 614.33        | <b>642.32</b> |         |         |        | <b>232.14</b> |         |         |        |
| R  |               |               |         |         |        | <b>175.12</b> |         |         |        |



#19287468-1 NL: 1.30E5



---

| Reference                          |          |        |   | P   | Score | Coverage | Accession |     |       |       |
|------------------------------------|----------|--------|---|-----|-------|----------|-----------|-----|-------|-------|
| Scan(s)                            | Sequence | MH+    | z | P   | XC    | DeltaCn  | Sp        | RSp | Ions  | Count |
| IPI:IPI00827892.1 TREMBL:A2N2G5 Ta |          |        |   | 1   | 10.1  | 0.0      | 0         |     |       |       |
| 19287468 - 1 K.GLEWVGR.I           |          | 816.44 | 2 | 0.4 | 2.817 | 0.203    | 839.1     | 1   | 13/18 | 8     |

1 of 1 peptide matches reported, 0 removed due to filtering

DTA for scans: 19287468-1  
Precursor ion: 408.72  
Mass type: mono  
Mod's: (M\* +15.99492) C=161.01468

Ion series for charge: +1

| AA | A ions        | B ions        | B* ions | Bo ions | C ions | Y ions        | Y* ions | Yo ions | Z ions |
|----|---------------|---------------|---------|---------|--------|---------------|---------|---------|--------|
| G  | 30.03         | 58.03         |         |         |        |               |         |         |        |
| L  | <b>143.12</b> | <b>171.11</b> |         |         |        | 759.41        |         |         |        |
| E  | 272.16        | <b>300.16</b> |         |         |        | <b>646.33</b> |         |         |        |
| W  | <b>458.24</b> | <b>486.23</b> |         |         |        | <b>517.29</b> |         |         |        |
| V  | 557.31        | <b>585.30</b> |         |         |        | <b>331.21</b> |         |         |        |
| G  | 614.33        | <b>642.32</b> |         |         |        | <b>232.14</b> |         |         |        |
| R  |               |               |         |         |        | <b>175.12</b> |         |         |        |



#19287468-1 NL: 1.30E5



---

| Reference                          |             |        |   | P   | Score | Coverage | Accession |     |       |       |
|------------------------------------|-------------|--------|---|-----|-------|----------|-----------|-----|-------|-------|
| Scan(s)                            | Sequence    | MH+    | z | P   | XC    | DeltaCn  | Sp        | RSp | Ions  | Count |
| IPI:IPI00829590.1 TREMBL:A6NNW3 EN |             |        |   | 1   | 10.1  | 0.0      | 0         |     |       |       |
| 19287468 - 1                       | K.GLEWVGR.I | 816.44 | 2 | 0.4 | 2.817 | 0.203    | 839.1     | 1   | 13/18 | 8     |

---

1 of 1 peptide matches reported, 0 removed due to filtering



DTA for scans: 19287468-1  
Precursor ion: 408.72  
Mass type: mono  
Mod's: (M\* +15.99492) C=161.01468

Ion series for charge: +1

| AA | A ions        | B ions        | B* ions | Bo ions | C ions | Y ions        | Y* ions | Yo ions | Z ions |
|----|---------------|---------------|---------|---------|--------|---------------|---------|---------|--------|
| G  | 30.03         | 58.03         |         |         |        |               |         |         |        |
| L  | <b>143.12</b> | <b>171.11</b> |         |         |        | 759.41        |         |         |        |
| E  | 272.16        | <b>300.16</b> |         |         |        | <b>646.33</b> |         |         |        |
| W  | <b>458.24</b> | <b>486.23</b> |         |         |        | <b>517.29</b> |         |         |        |
| V  | 557.31        | <b>585.30</b> |         |         |        | <b>331.21</b> |         |         |        |
| G  | 614.33        | <b>642.32</b> |         |         |        | <b>232.14</b> |         |         |        |
| R  |               |               |         |         |        | <b>175.12</b> |         |         |        |

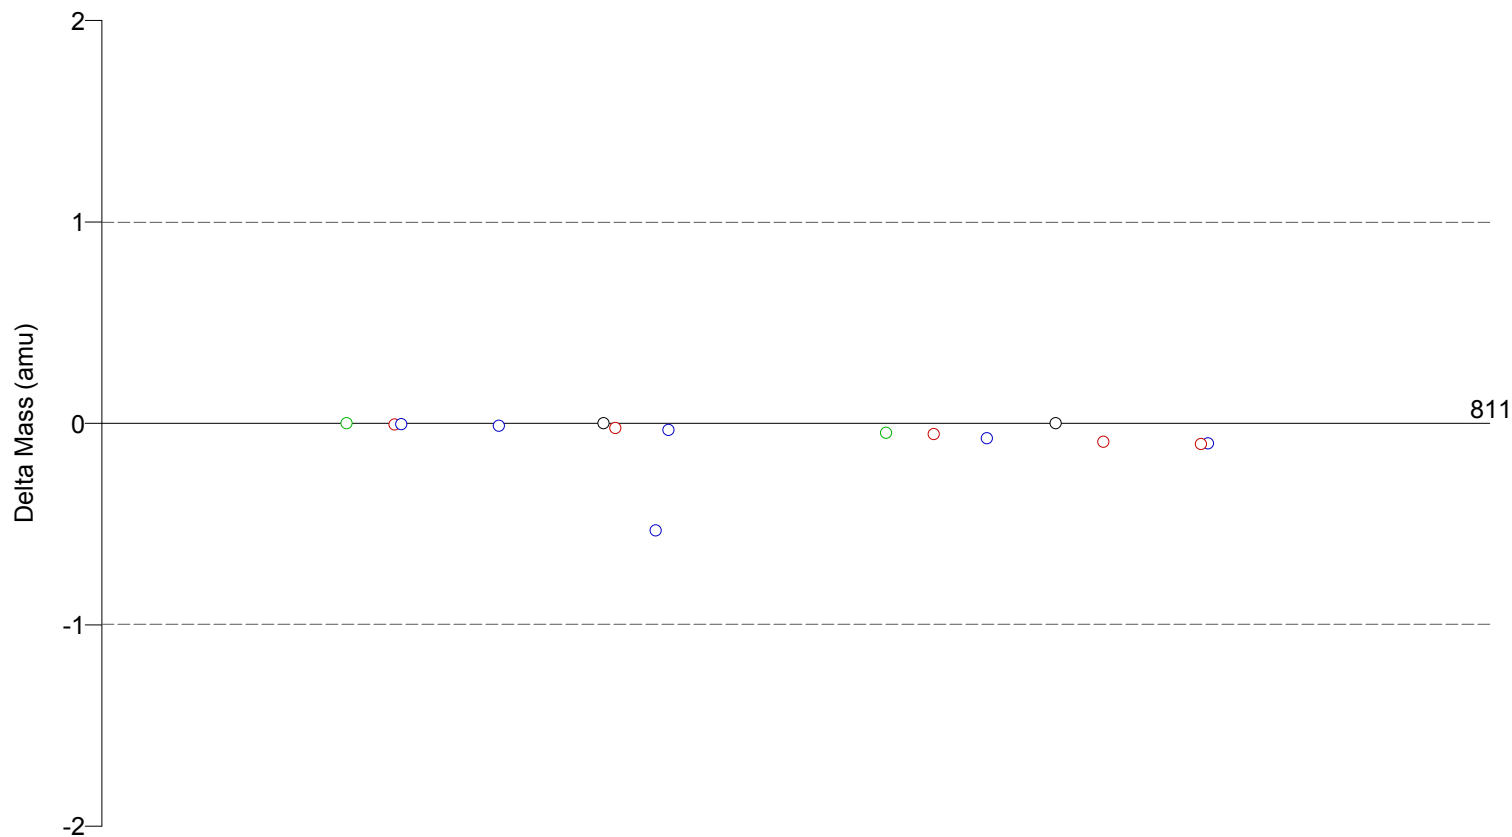

#19287468-1 NL: 1.30E5



---

| Reference                          |             |        |   | P   | Score | Coverage | Accession |     |       |       |
|------------------------------------|-------------|--------|---|-----|-------|----------|-----------|-----|-------|-------|
| Scan(s)                            | Sequence    | MH+    | z | P   | XC    | DeltaCn  | Sp        | RSp | Ions  | Count |
| IPI:IPI00829841.1 ENSEMBL:ENSP0000 |             |        |   | 1   | 10.1  | 0.0      | 0         |     |       |       |
| 19287468 - 1                       | K.GLEWVGR.I | 816.44 | 2 | 0.4 | 2.817 | 0.203    | 839.1     | 1   | 13/18 | 8     |

1 of 1 peptide matches reported, 0 removed due to filtering

DTA for scans: 19287468-1  
Precursor ion: 408.72  
Mass type: mono  
Mod's: (M\* +15.99492) C=161.01468

Ion series for charge: +1

| AA | A ions        | B ions        | B* ions | Bo ions | C ions | Y ions        | Y* ions | Yo ions | Z ions |
|----|---------------|---------------|---------|---------|--------|---------------|---------|---------|--------|
| G  | 30.03         | 58.03         |         |         |        |               |         |         |        |
| L  | <b>143.12</b> | <b>171.11</b> |         |         |        | 759.41        |         |         |        |
| E  | 272.16        | <b>300.16</b> |         |         |        | <b>646.33</b> |         |         |        |
| W  | <b>458.24</b> | <b>486.23</b> |         |         |        | <b>517.29</b> |         |         |        |
| V  | 557.31        | <b>585.30</b> |         |         |        | <b>331.21</b> |         |         |        |
| G  | 614.33        | <b>642.32</b> |         |         |        | <b>232.14</b> |         |         |        |
| R  |               |               |         |         |        | <b>175.12</b> |         |         |        |



#19287468-1 NL: 1.30E5



---

| Reference                          |             |        |   | P   | Score | Coverage | Accession |     |       |       |
|------------------------------------|-------------|--------|---|-----|-------|----------|-----------|-----|-------|-------|
| Scan(s)                            | Sequence    | MH+    | z | P   | XC    | DeltaCn  | Sp        | RSp | Ions  | Count |
| IPI:IPI00921238.1 H-INV:HIT0003928 |             |        |   | 1   | 10.1  | 0.0      | 0         |     |       |       |
| 19287468 - 1                       | K.GLEWVGR.I | 816.44 | 2 | 0.4 | 2.817 | 0.203    | 839.1     | 1   | 13/18 | 8     |

---

1 of 1 peptide matches reported, 0 removed due to filtering

DTA for scans: 19287468-1  
Precursor ion: 408.72  
Mass type: mono  
Mod's: (M\* +15.99492) C=161.01468

Ion series for charge: +1

| AA | A ions        | B ions        | B* ions | Bo ions | C ions | Y ions        | Y* ions | Yo ions | Z ions |
|----|---------------|---------------|---------|---------|--------|---------------|---------|---------|--------|
| G  | 30.03         | 58.03         |         |         |        |               |         |         |        |
| L  | <b>143.12</b> | <b>171.11</b> |         |         |        | 759.41        |         |         |        |
| E  | 272.16        | <b>300.16</b> |         |         |        | <b>646.33</b> |         |         |        |
| W  | <b>458.24</b> | <b>486.23</b> |         |         |        | <b>517.29</b> |         |         |        |
| V  | 557.31        | <b>585.30</b> |         |         |        | <b>331.21</b> |         |         |        |
| G  | 614.33        | <b>642.32</b> |         |         |        | <b>232.14</b> |         |         |        |
| R  |               |               |         |         |        | <b>175.12</b> |         |         |        |



#19287468-1 NL: 1.30E5





---

| Reference                          |             |        |   | P   | Score | Coverage | Accession |     |       |       |
|------------------------------------|-------------|--------|---|-----|-------|----------|-----------|-----|-------|-------|
| Scan(s)                            | Sequence    | MH+    | z | P   | XC    | DeltaCn  | Sp        | RSp | Ions  | Count |
| IPI:IPI00936370.1 TREMBL:Q0ZCJ6 EN |             |        |   | 1   | 10.1  | 0.0      | 0         |     |       |       |
| 19287468 - 1                       | K.GLEWVGR.I | 816.44 | 2 | 0.4 | 2.817 | 0.203    | 839.1     | 1   | 13/18 | 8     |

---

1 of 1 peptide matches reported, 0 removed due to filtering

DTA for scans: 19287468-1  
Precursor ion: 408.72  
Mass type: mono  
Mod's: (M\* +15.99492) C=161.01468

Ion series for charge: +1

| AA | A ions        | B ions        | B* ions | Bo ions | C ions | Y ions        | Y* ions | Yo ions | Z ions |
|----|---------------|---------------|---------|---------|--------|---------------|---------|---------|--------|
| G  | 30.03         | 58.03         |         |         |        |               |         |         |        |
| L  | <b>143.12</b> | <b>171.11</b> |         |         |        | 759.41        |         |         |        |
| E  | 272.16        | <b>300.16</b> |         |         |        | <b>646.33</b> |         |         |        |
| W  | <b>458.24</b> | <b>486.23</b> |         |         |        | <b>517.29</b> |         |         |        |
| V  | 557.31        | <b>585.30</b> |         |         |        | <b>331.21</b> |         |         |        |
| G  | 614.33        | <b>642.32</b> |         |         |        | <b>232.14</b> |         |         |        |
| R  |               |               |         |         |        | <b>175.12</b> |         |         |        |



#19287468-1 NL: 1.30E5



---

| Reference                                                      |             |        |   | P   | Score | Coverage | Accession |     |       |       |
|----------------------------------------------------------------|-------------|--------|---|-----|-------|----------|-----------|-----|-------|-------|
| Scan(s)                                                        | Sequence    | MH+    | z | P   | XC    | DeltaCn  | Sp        | RSp | Ions  | Count |
| IPI:IPI00021856.3 SWISS-PROT:P02655 TREMBL:C0JYY4;Q6P163 ENSEM |             |        |   | 1   | 10.1  | 0.0      |           | 0   |       |       |
| 19287468 - 1                                                   | K.LRDLYSK.S | 894.50 | 2 | 0.6 | 2.716 | 0.205    | 1098.8    | 1   | 15/18 |       |

---

1 of 1 peptide matches reported, 0 removed due to filtering

DTA for scans: 19287468-1  
Precursor ion: 447.76  
Mass type: mono  
Mod's: (M\* +15.99492) C=161.01468

Ion series for charge: +1

| AA | A ions        | B ions        | B* ions | Bo ions | C ions | Y ions        | Y* ions | Yo ions | Z ions |
|----|---------------|---------------|---------|---------|--------|---------------|---------|---------|--------|
| L  | 86.10         | <b>114.09</b> |         |         |        |               |         |         |        |
| R  | <b>242.20</b> | <b>270.19</b> |         |         |        | 781.42        |         |         |        |
| D  | 357.22        | <b>385.22</b> |         |         |        | <b>625.32</b> |         |         |        |
| L  | <b>470.31</b> | <b>498.30</b> |         |         |        | <b>510.29</b> |         |         |        |
| Y  | <b>633.37</b> | <b>661.37</b> |         |         |        | <b>397.21</b> |         |         |        |
| S  | <b>720.40</b> | <b>748.40</b> |         |         |        | <b>234.14</b> |         |         |        |
| K  |               |               |         |         |        | <b>147.11</b> |         |         |        |

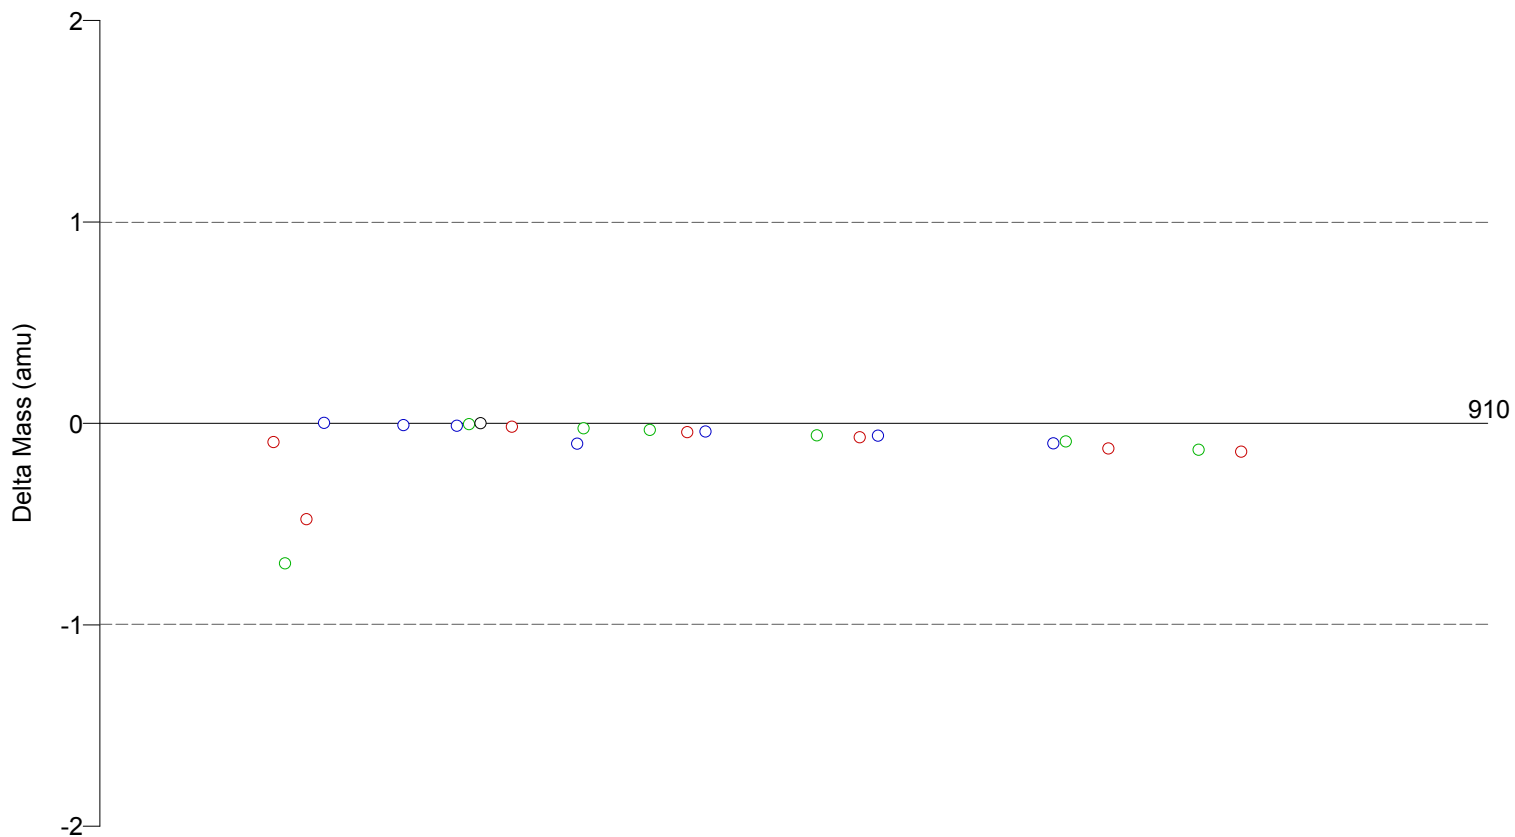

#19287468-1 NL: 1.39E5

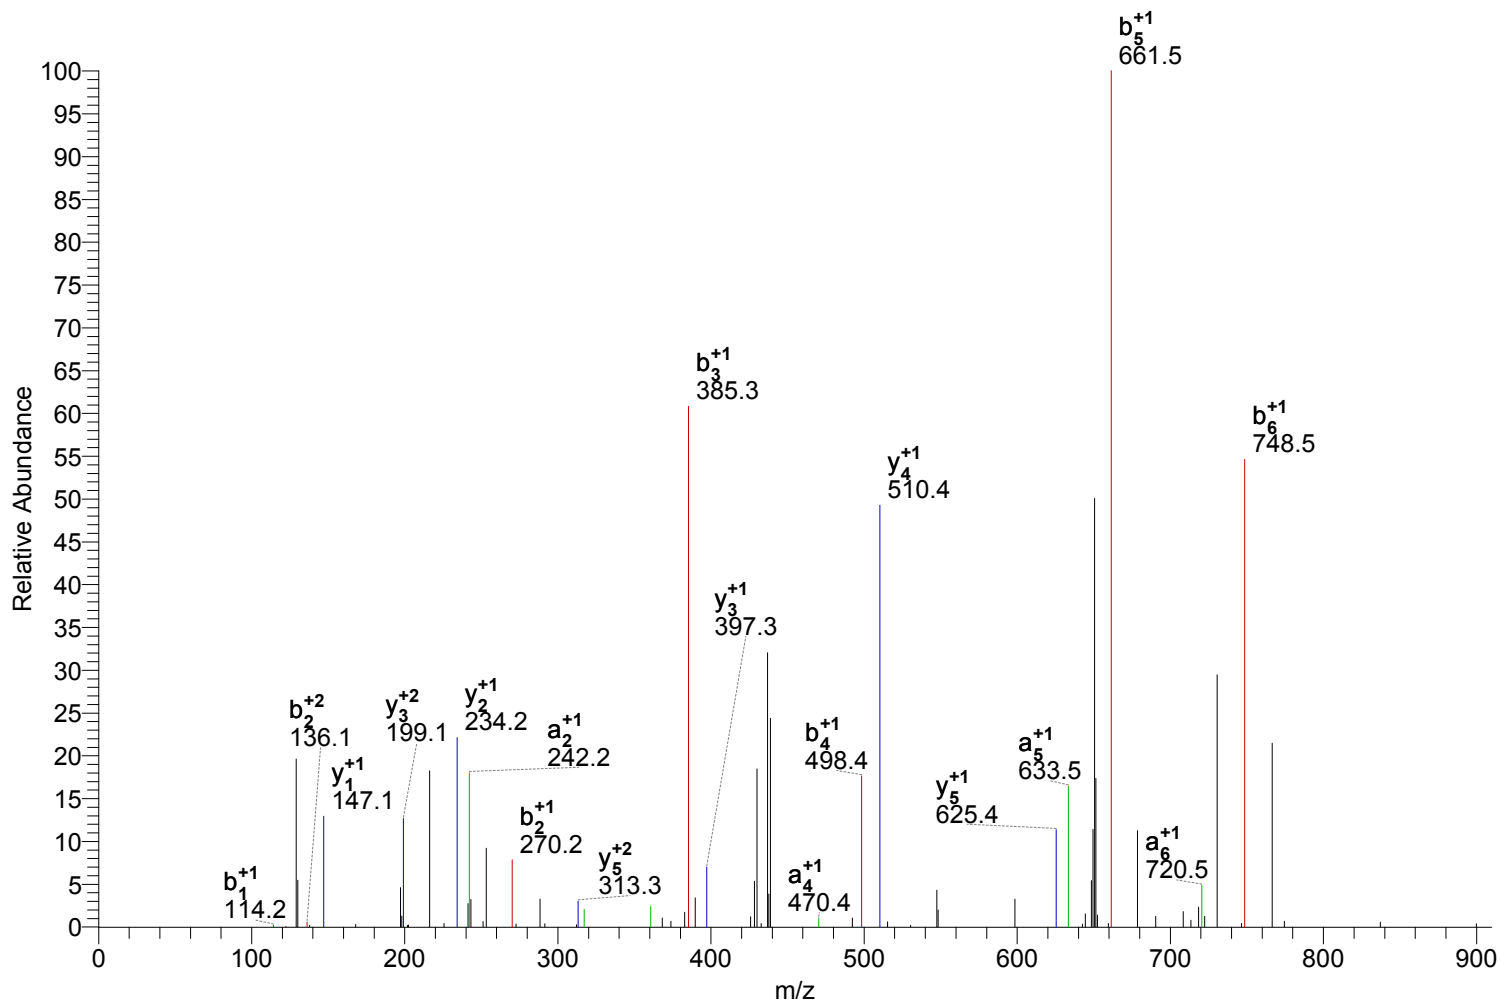

---

| Reference                       |                               |         |   | P | Score | Coverage | Accession |     |       |       |
|---------------------------------|-------------------------------|---------|---|---|-------|----------|-----------|-----|-------|-------|
| Scan(s)                         | Sequence                      | MH+     | z | P | XC    | DeltaCn  | Sp        | RSp | Ions  | Count |
| IPI:IPI00555595.1 TREMBL:Q59GS1 | Tax_Id=9606 Gene_Symbol=UCHL1 |         |   | 1 | 8.1   | 0.0      | 0         |     |       |       |
| 19287468 - 1                    | R.RGRPPVPAAGR.D               | 1133.67 | 2 | 1 | 2.610 | 0.428    | 386.9     | 2   | 13/30 |       |

---

1 of 1 peptide matches reported, 0 removed due to filtering

DTA for scans: 19287468-1  
Precursor ion: 567.33  
Mass type: mono  
Mod's: (M\* +15.99492) C=161.01468

Ion series for charge: +1

| AA | A ions        | B ions        | B* ions | Bo ions | C ions | Y ions        | Y* ions | Yo ions | Z ions |
|----|---------------|---------------|---------|---------|--------|---------------|---------|---------|--------|
| R  | 129.11        | 157.11        |         |         |        |               |         |         |        |
| G  | <b>186.13</b> | 214.13        |         |         |        | <b>977.56</b> |         |         |        |
| R  | 342.24        | 370.23        |         |         |        | 920.54        |         |         |        |
| P  | 439.29        | 467.28        |         |         |        | 764.44        |         |         |        |
| P  | <b>536.34</b> | 564.34        |         |         |        | 667.39        |         |         |        |
| V  | 635.41        | 663.40        |         |         |        | <b>570.34</b> |         |         |        |
| P  | <b>732.46</b> | <b>760.46</b> |         |         |        | 471.27        |         |         |        |
| A  | <b>803.50</b> | <b>831.49</b> |         |         |        | <b>374.21</b> |         |         |        |
| A  | 874.54        | <b>902.53</b> |         |         |        | <b>303.18</b> |         |         |        |
| G  | <b>931.56</b> | 959.55        |         |         |        | 232.14        |         |         |        |
| R  |               |               |         |         |        | 175.12        |         |         |        |



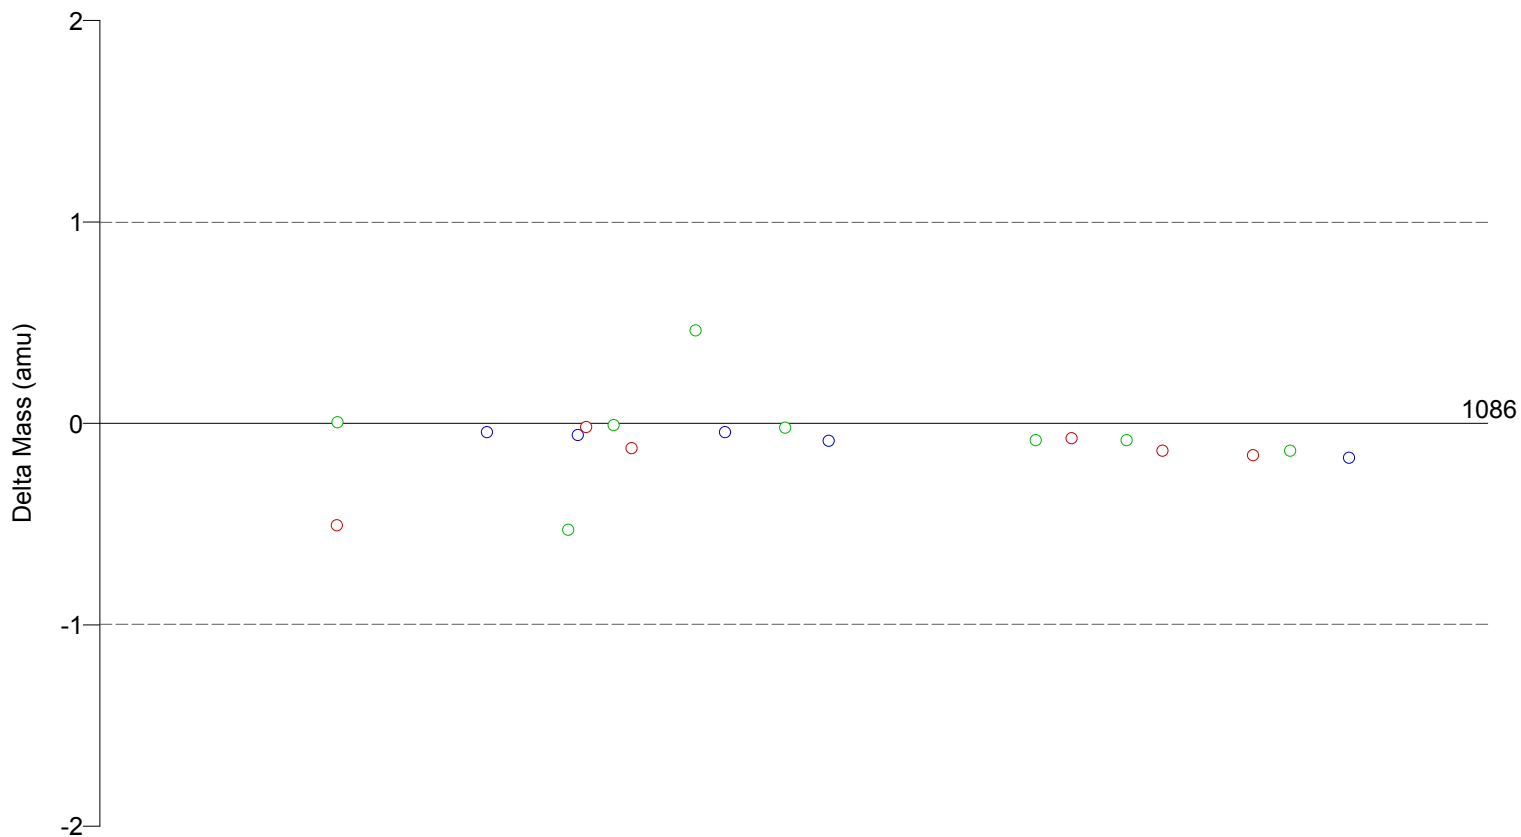

#19287468-1 NL: 2.96E5

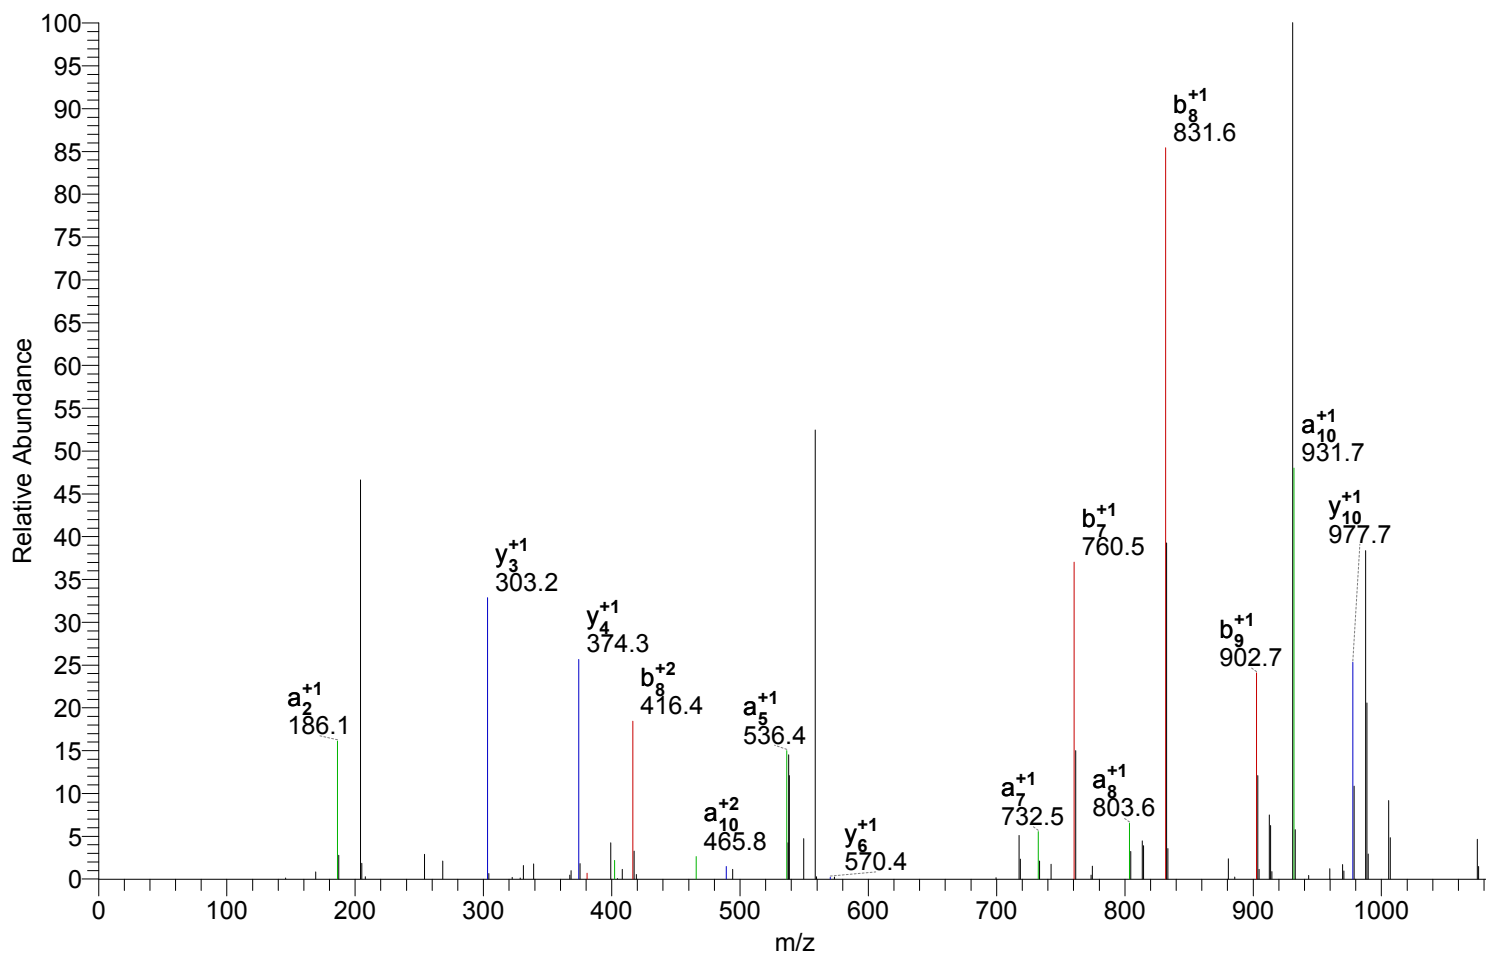

---

| Reference                             |               |              |   | P   | Score | Coverage | Accession |     |       |       |
|---------------------------------------|---------------|--------------|---|-----|-------|----------|-----------|-----|-------|-------|
| Scan(s)                               | Sequence      | MH+          | z | P   | XC    | DeltaCn  | Sp        | RSp | Ions  | Count |
| IPI:IPI00937422.1 REFSEQ:XP_002346542 | Tax_Id=9606   | Gene_Symbol= |   | 1   | 8.1   | 0.0      |           | 0   |       |       |
| 19287468 - 1                          | R.KGSNIGQLR.P | 972.56       | 2 | 0.4 | 2.427 | 0.100    | 721.2     | 2   | 13/24 |       |

---

1 of 1 peptide matches reported, 0 removed due to filtering

DTA for scans: 19287468-1  
Precursor ion: 486.79  
Mass type: mono  
Mod's: (M\* +15.99492) C=161.01468

Ion series for charge: +1

| AA | A ions | B ions        | B* ions | Bo ions | C ions | Y ions        | Y* ions | Yo ions | Z ions |
|----|--------|---------------|---------|---------|--------|---------------|---------|---------|--------|
| K  | 101.11 | <b>129.10</b> |         |         |        |               |         |         |        |
| G  | 158.13 | 186.12        |         |         |        | 844.46        |         |         |        |
| S  | 245.16 | 273.16        |         |         |        | 787.44        |         |         |        |
| N  | 359.20 | <b>387.20</b> |         |         |        | <b>700.41</b> |         |         |        |
| I  | 472.29 | <b>500.28</b> |         |         |        | <b>586.37</b> |         |         |        |
| G  | 529.31 | 557.30        |         |         |        | <b>473.28</b> |         |         |        |
| Q  | 657.37 | <b>685.36</b> |         |         |        | 416.26        |         |         |        |
| L  | 770.45 | <b>798.45</b> |         |         |        | <b>288.20</b> |         |         |        |
| R  |        |               |         |         |        | <b>175.12</b> |         |         |        |

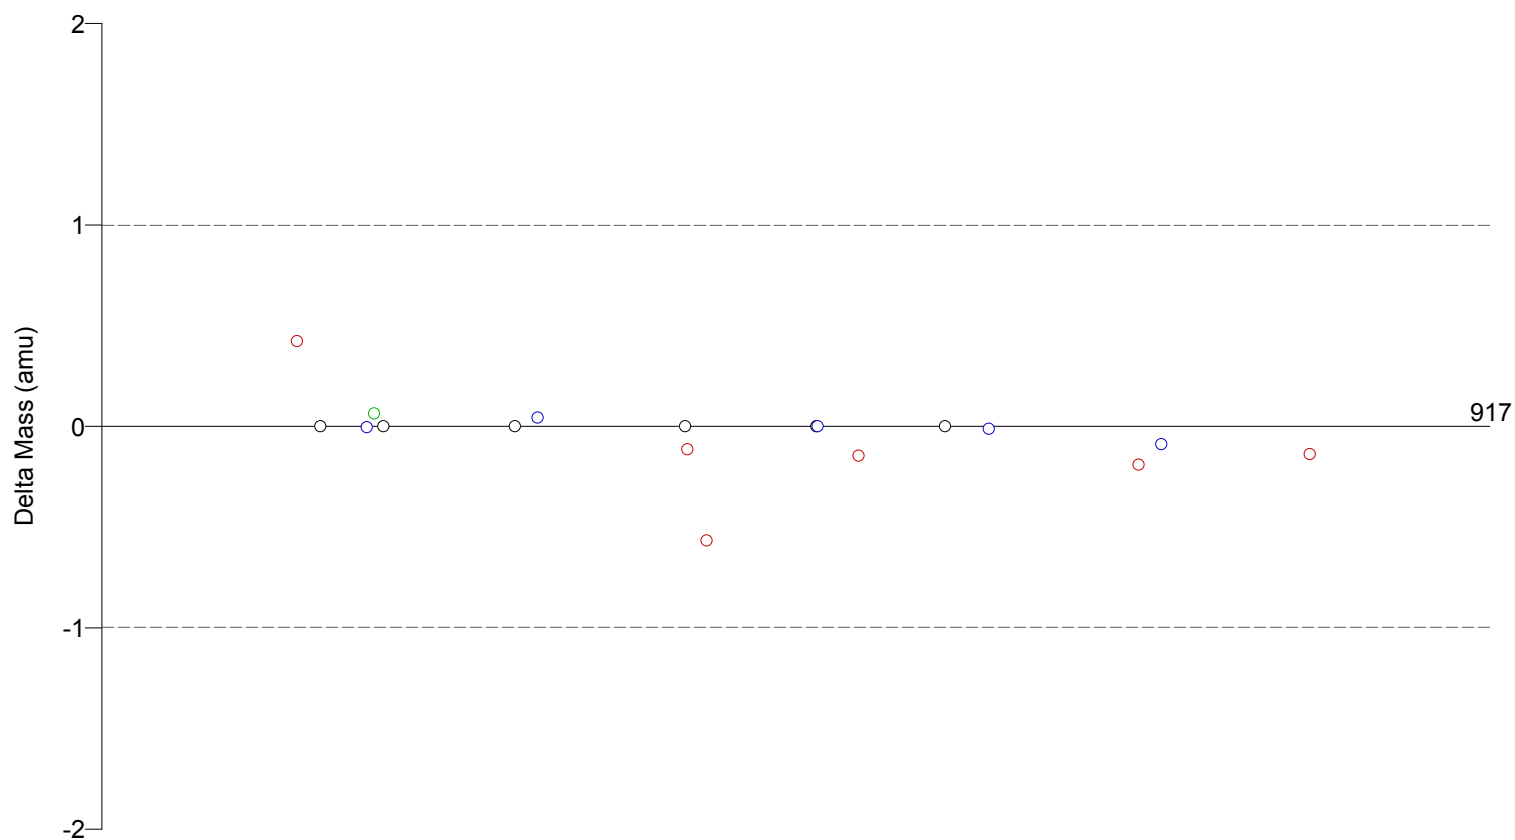

#19287468-1 NL: 1.90E5

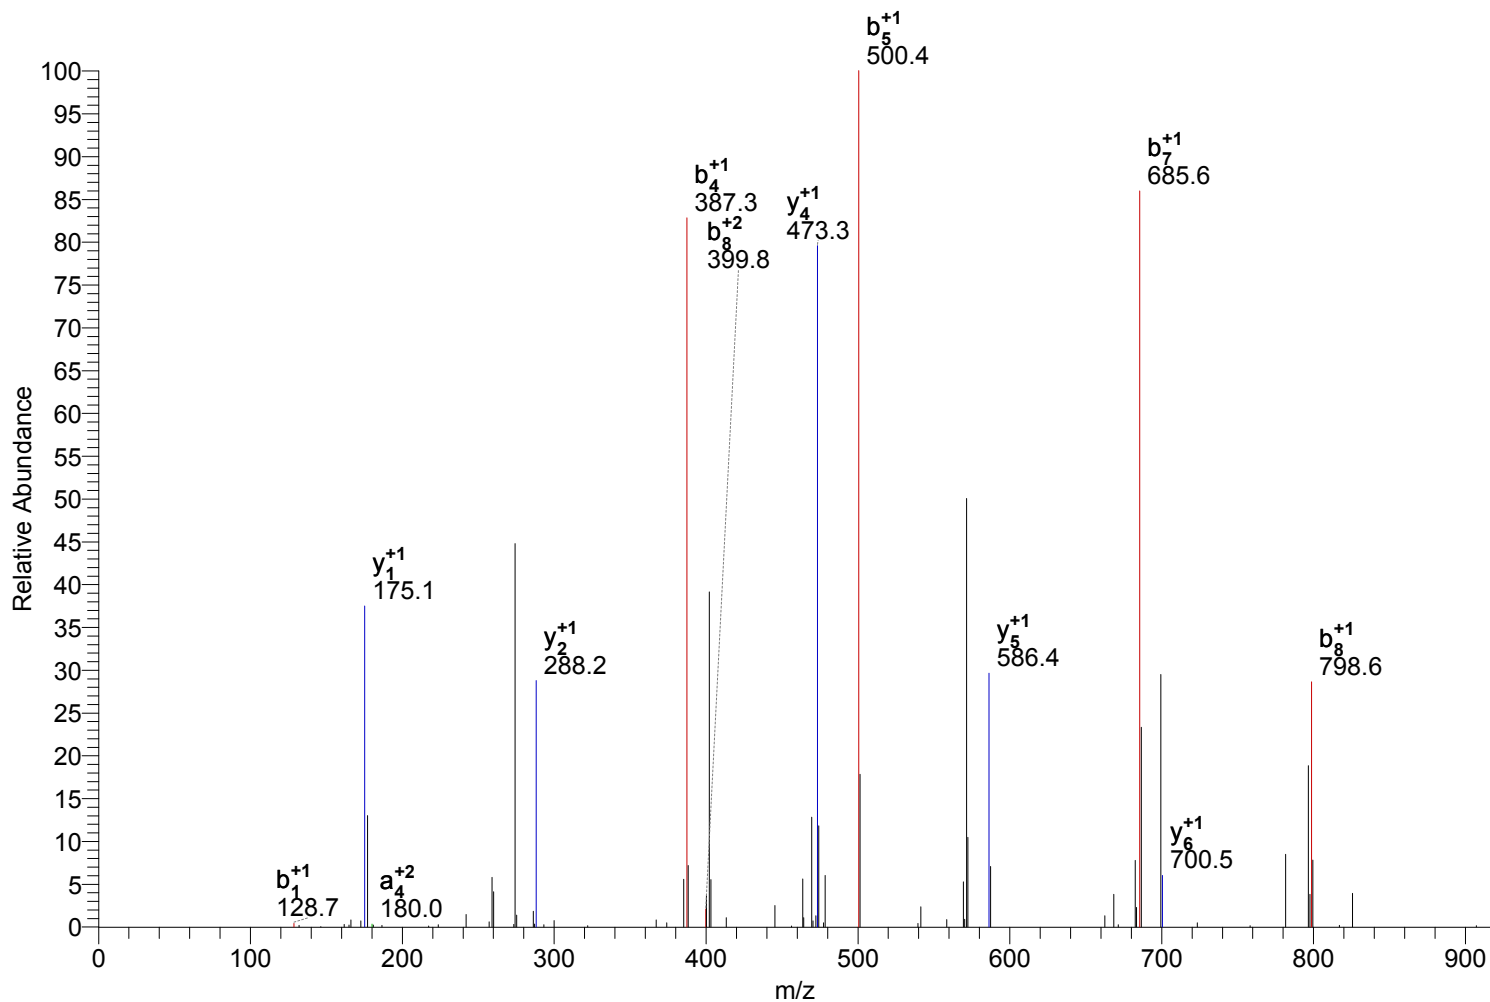

---

| Reference                                                      |               |         |   | P   | Score | Coverage | Accession |     |       |       |
|----------------------------------------------------------------|---------------|---------|---|-----|-------|----------|-----------|-----|-------|-------|
| Scan(s)                                                        | Sequence      | MH+     | z | P   | XC    | DeltaCn  | Sp        | RSp | Ions  | Count |
| IPI:IPI00168913.1 SWISS-PROT:Q86UK5-2 TREMBL:Q4W5A4;Q4W5B1 ENS |               |         |   | 1   | 8.1   | 0.0      | 0         |     |       |       |
| 19287468 - 1                                                   | R.SAVECSNLR.T | 1149.56 | 2 | 0.4 | 2.306 | 0.370    | 355.1     | 4   | 12/27 | 2     |

---

1 of 1 peptide matches reported, 0 removed due to filtering

DTA for scans: 19287468-1  
Precursor ion: 575.27  
Mass type: mono  
Mod's: (M\* +15.99492) C=161.01468

Ion series for charge: +1

| AA | A ions        | B ions        | B* ions | Bo ions | C ions | Y ions        | Y* ions | Yo ions | Z ions |
|----|---------------|---------------|---------|---------|--------|---------------|---------|---------|--------|
| S  | 60.04         | 88.04         |         |         |        |               |         |         |        |
| A  | 131.08        | 159.08        |         |         |        | 1062.52       |         |         |        |
| V  | <b>230.15</b> | <b>258.14</b> |         |         |        | 991.49        |         |         |        |
| E  | <b>359.19</b> | <b>387.19</b> |         |         |        | <b>892.42</b> |         |         |        |
| C  | 520.21        | <b>548.20</b> |         |         |        | <b>763.38</b> |         |         |        |
| S  | 607.24        | 635.23        |         |         |        | <b>602.36</b> |         |         |        |
| N  | 721.28        | 749.28        |         |         |        | 515.33        |         |         |        |
| L  | 834.37        | 862.36        |         |         |        | <b>401.29</b> |         |         |        |
| L  | <b>947.45</b> | <b>975.45</b> |         |         |        | 288.20        |         |         |        |
| R  |               |               |         |         |        | <b>175.12</b> |         |         |        |

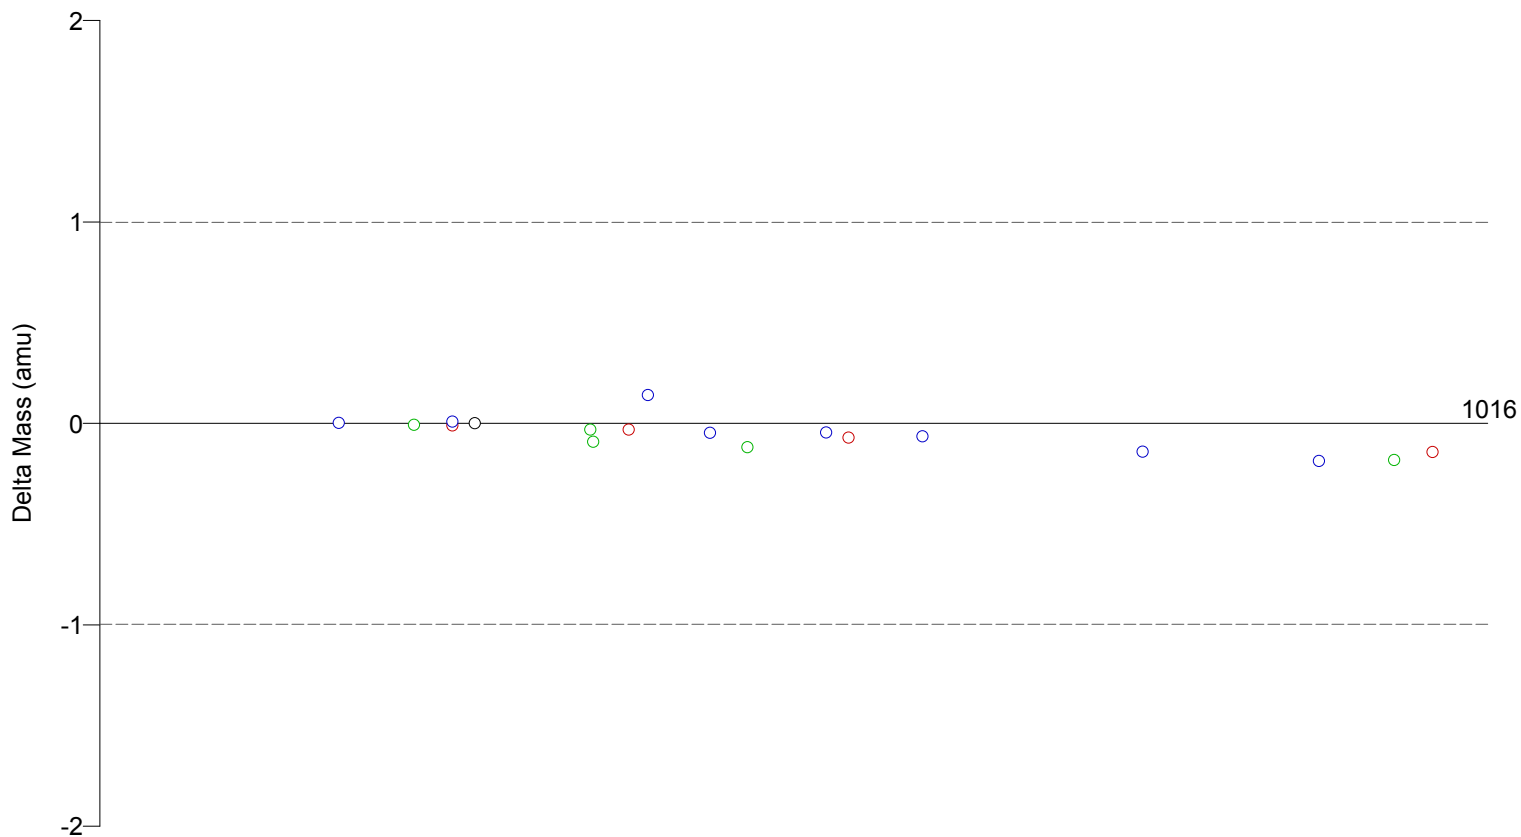

#19287468-1 NL: 1.42E5

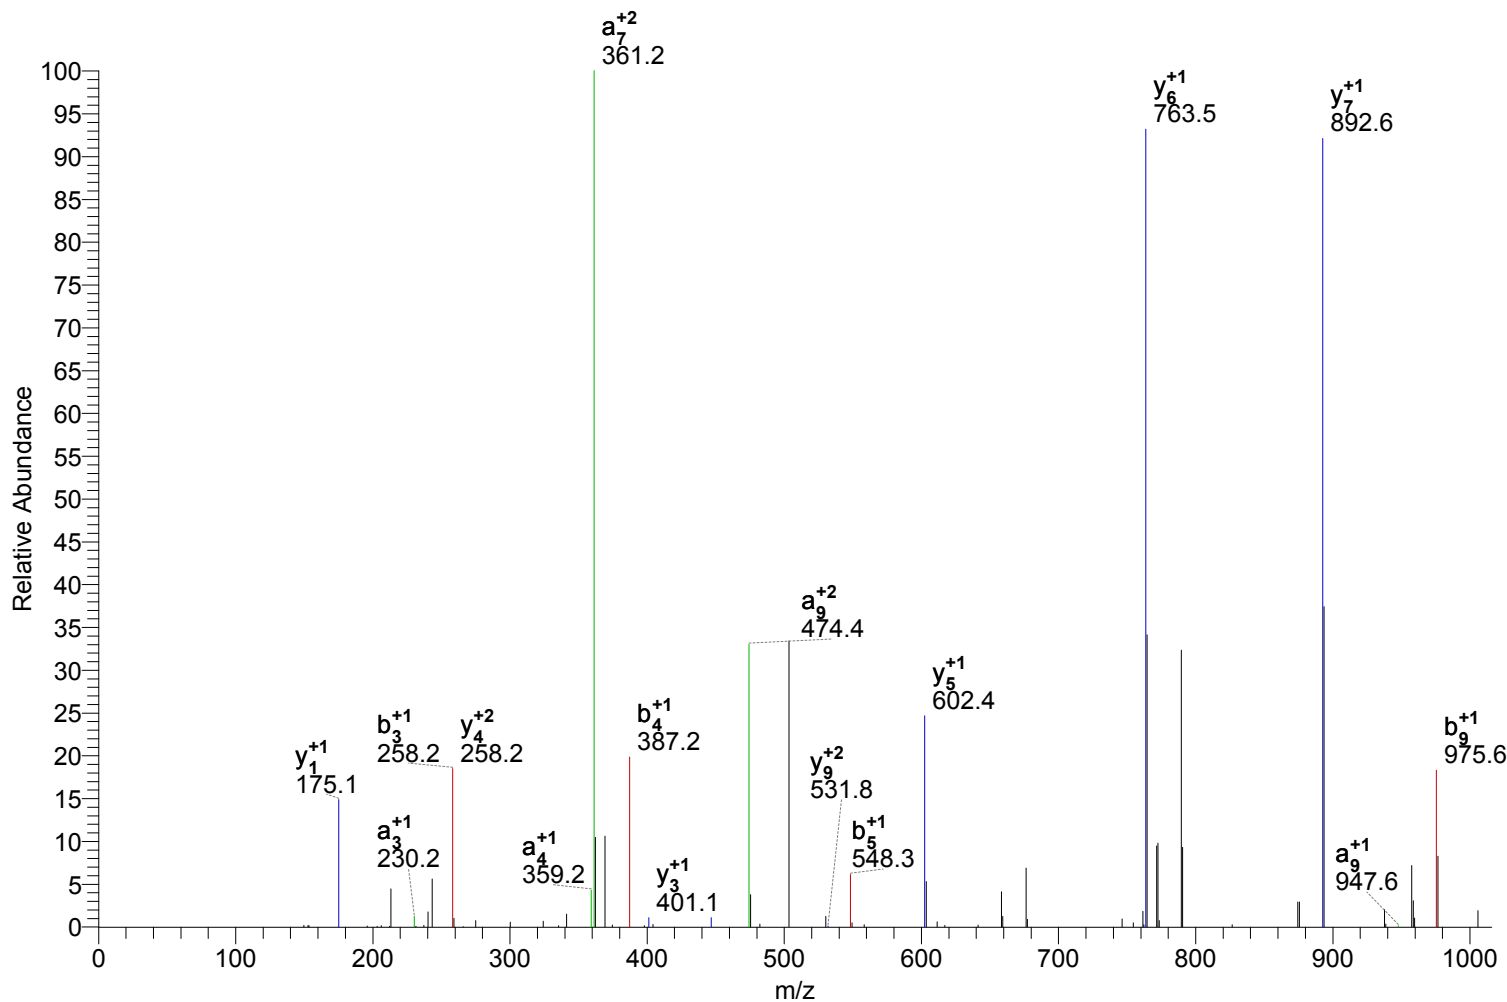

---

| Reference                          |               |         |   | P   | Score | Coverage | Accession |     |       |       |
|------------------------------------|---------------|---------|---|-----|-------|----------|-----------|-----|-------|-------|
| Scan(s)                            | Sequence      | MH+     | z | P   | XC    | DeltaCn  | Sp        | RSp | Ions  | Count |
| IPI:IPI00382523.1 SWISS-PROT:Q86UK |               |         |   | 1   | 8.1   | 0.0      | 0         |     |       |       |
| 19287468 - 1                       | R.SAVECSNLR.T | 1149.56 | 2 | 0.4 | 2.306 | 0.370    | 355.1     | 4   | 12/27 | 2     |

---

1 of 1 peptide matches reported, 0 removed due to filtering



DTA for scans: 19287468-1  
Precursor ion: 575.27  
Mass type: mono  
Mod's: (M\* +15.99492) C=161.01468

Ion series for charge: +1

| AA | A ions        | B ions        | B* ions | Bo ions | C ions | Y ions        | Y* ions | Yo ions | Z ions |
|----|---------------|---------------|---------|---------|--------|---------------|---------|---------|--------|
| S  | 60.04         | 88.04         |         |         |        |               |         |         |        |
| A  | 131.08        | 159.08        |         |         |        | 1062.52       |         |         |        |
| V  | <b>230.15</b> | <b>258.14</b> |         |         |        | 991.49        |         |         |        |
| E  | <b>359.19</b> | <b>387.19</b> |         |         |        | <b>892.42</b> |         |         |        |
| C  | 520.21        | <b>548.20</b> |         |         |        | <b>763.38</b> |         |         |        |
| S  | 607.24        | 635.23        |         |         |        | <b>602.36</b> |         |         |        |
| N  | 721.28        | 749.28        |         |         |        | 515.33        |         |         |        |
| L  | 834.37        | 862.36        |         |         |        | <b>401.29</b> |         |         |        |
| L  | <b>947.45</b> | <b>975.45</b> |         |         |        | 288.20        |         |         |        |
| R  |               |               |         |         |        | <b>175.12</b> |         |         |        |

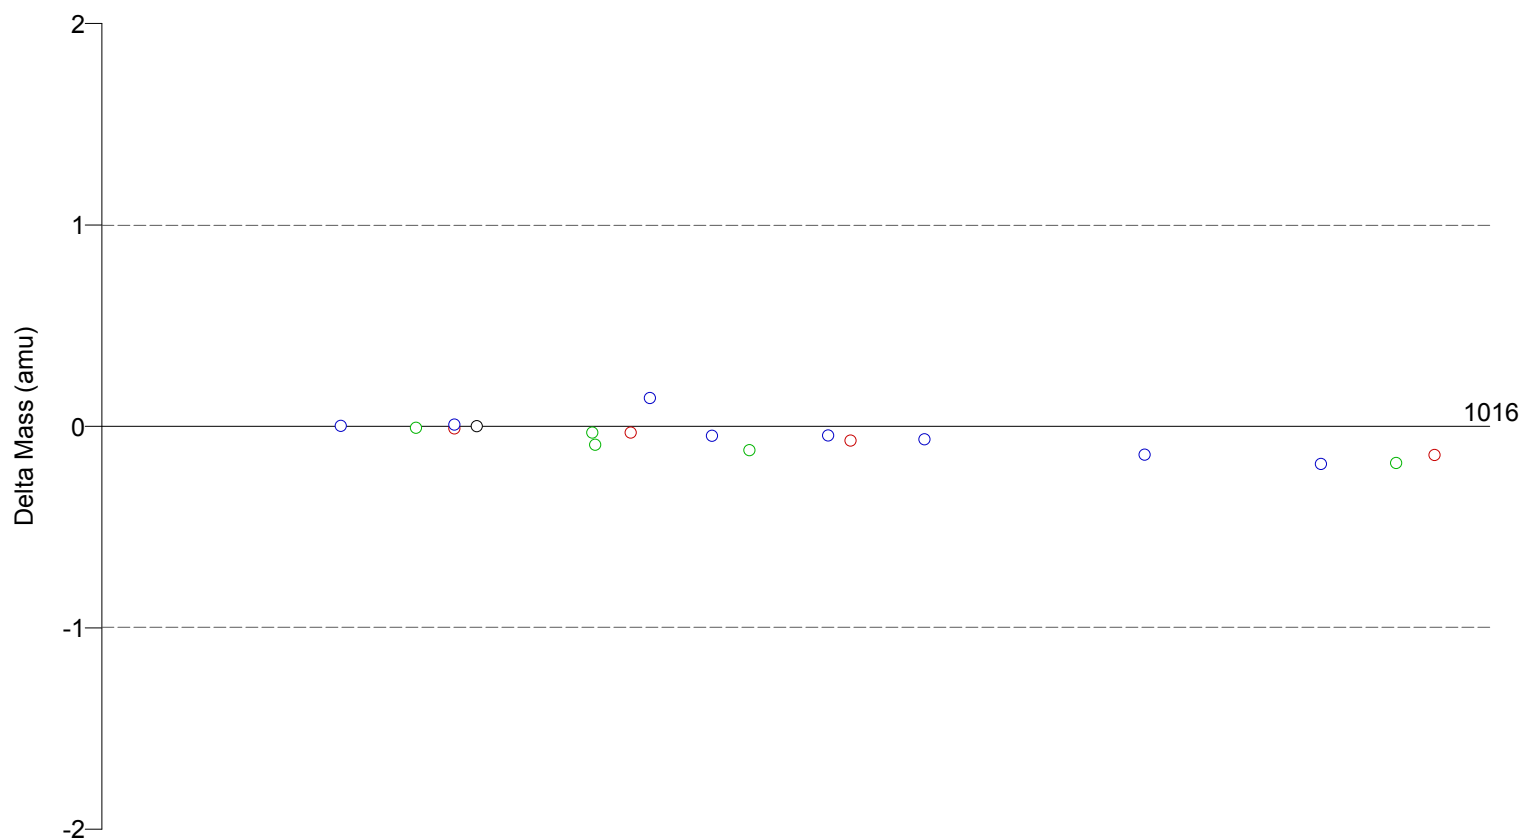

#19287468-1 NL: 1.42E5

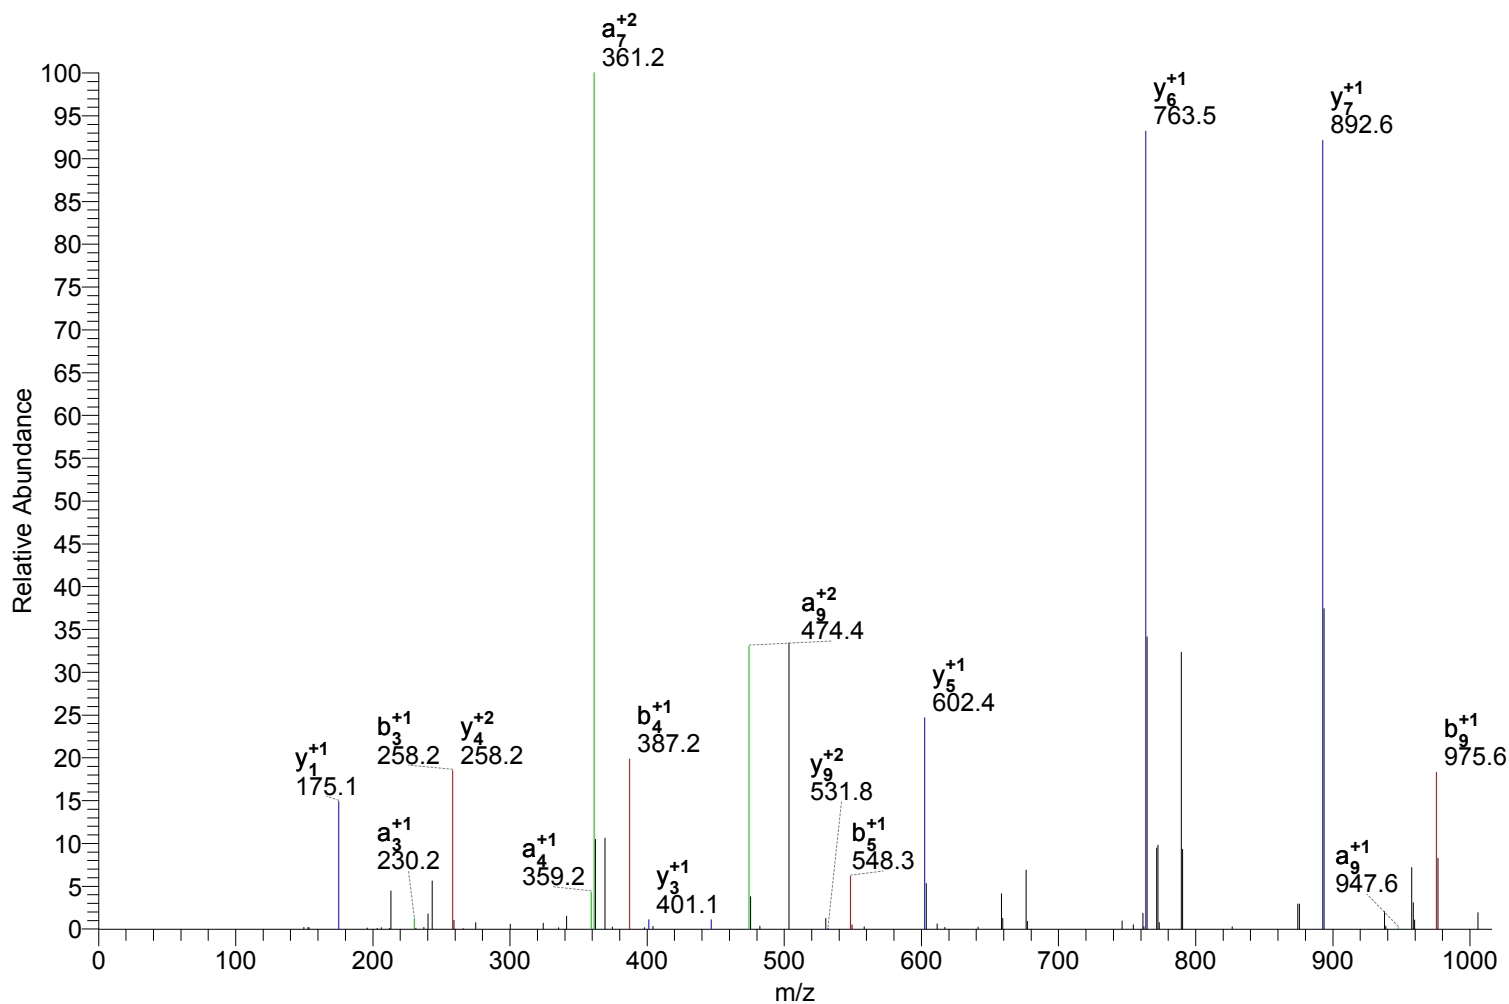

---

| Reference                          |               |         |   | P   | Score | Coverage | Accession |     |       |       |
|------------------------------------|---------------|---------|---|-----|-------|----------|-----------|-----|-------|-------|
| Scan(s)                            | Sequence      | MH+     | z | P   | XC    | DeltaCn  | Sp        | RSp | Ions  | Count |
| IPI:IPI00382525.1 SWISS-PROT:Q86UK |               |         |   | 1   | 8.1   | 0.0      | 0         |     |       |       |
| 19287468 - 1                       | R.SAVECSNLR.T | 1149.56 | 2 | 0.4 | 2.306 | 0.370    | 355.1     | 4   | 12/27 | 2     |

---

1 of 1 peptide matches reported, 0 removed due to filtering

DTA for scans: 19287468-1  
Precursor ion: 575.27  
Mass type: mono  
Mod's: (M\* +15.99492) C=161.01468

Ion series for charge: +1

| AA | A ions        | B ions        | B* ions | Bo ions | C ions | Y ions        | Y* ions | Yo ions | Z ions |
|----|---------------|---------------|---------|---------|--------|---------------|---------|---------|--------|
| S  | 60.04         | 88.04         |         |         |        |               |         |         |        |
| A  | 131.08        | 159.08        |         |         |        | 1062.52       |         |         |        |
| V  | <b>230.15</b> | <b>258.14</b> |         |         |        | 991.49        |         |         |        |
| E  | <b>359.19</b> | <b>387.19</b> |         |         |        | <b>892.42</b> |         |         |        |
| C  | 520.21        | <b>548.20</b> |         |         |        | <b>763.38</b> |         |         |        |
| S  | 607.24        | 635.23        |         |         |        | <b>602.36</b> |         |         |        |
| N  | 721.28        | 749.28        |         |         |        | 515.33        |         |         |        |
| L  | 834.37        | 862.36        |         |         |        | <b>401.29</b> |         |         |        |
| L  | <b>947.45</b> | <b>975.45</b> |         |         |        | 288.20        |         |         |        |
| R  |               |               |         |         |        | <b>175.12</b> |         |         |        |



#19287468-1 NL: 1.42E5

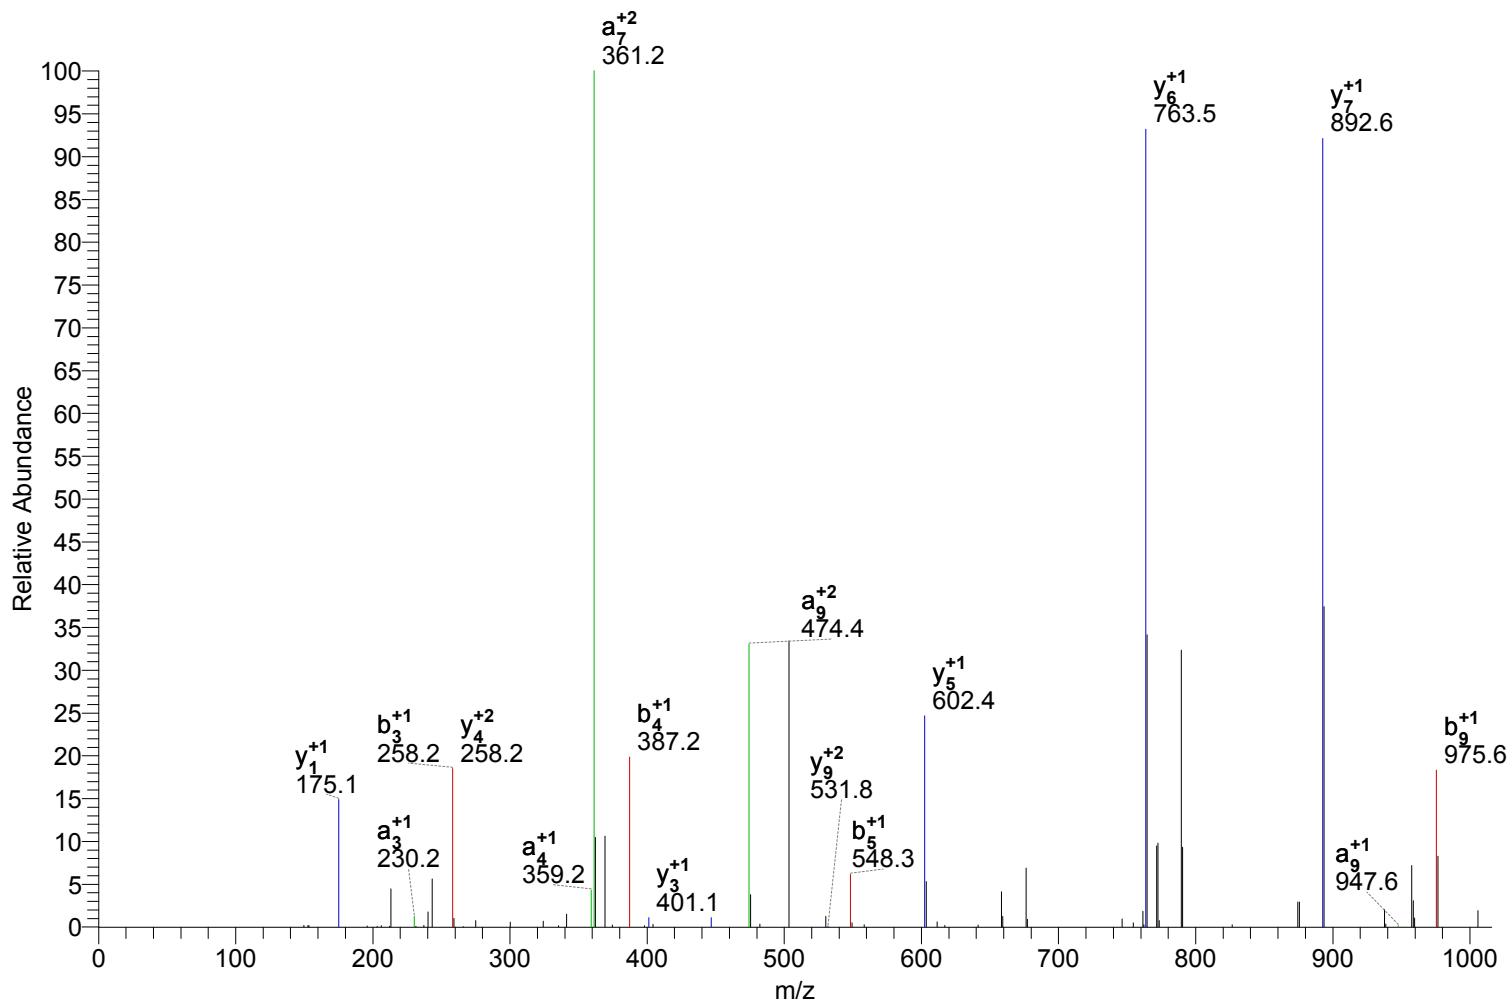

---

| Reference                                                      |              |        |   | P   | Score | Coverage | Accession |     |       |       |
|----------------------------------------------------------------|--------------|--------|---|-----|-------|----------|-----------|-----|-------|-------|
| Scan(s)                                                        | Sequence     | MH+    | z | P   | XC    | DeltaCn  | Sp        | RSp | Ions  | Count |
| IPI:IPI00375358.2 SWISS-PROT:P35251-1 TREMBL:A8K6E7 ENSEMBL:EN |              |        |   | 1   | 8.1   | 0.0      | 0         |     |       |       |
| 19287468 - 1                                                   | K.IGEVSSPK.A | 816.45 | 2 | 0.6 | 2.245 | 0.317    | 420.5     | 3   | 11/21 | 1     |

---

1 of 1 peptide matches reported, 0 removed due to filtering

DTA for scans: 19287468-1  
Precursor ion: 408.72  
Mass type: mono  
Mod's: (M\* +15.99492) C=161.01468

Ion series for charge: +1

| AA | A ions        | B ions        | B* ions | Bo ions | C ions | Y ions        | Y* ions | Yo ions | Z ions |
|----|---------------|---------------|---------|---------|--------|---------------|---------|---------|--------|
| I  | 86.10         | 114.09        |         |         |        |               |         |         |        |
| G  | <b>143.12</b> | <b>171.11</b> |         |         |        | 703.36        |         |         |        |
| E  | 272.16        | <b>300.16</b> |         |         |        | <b>646.34</b> |         |         |        |
| V  | 371.23        | 399.22        |         |         |        | <b>517.30</b> |         |         |        |
| S  | <b>458.26</b> | <b>486.26</b> |         |         |        | 418.23        |         |         |        |
| S  | 545.29        | 573.29        |         |         |        | <b>331.20</b> |         |         |        |
| P  | <b>642.35</b> | 670.34        |         |         |        | 244.17        |         |         |        |
| K  |               |               |         |         |        | 147.11        |         |         |        |

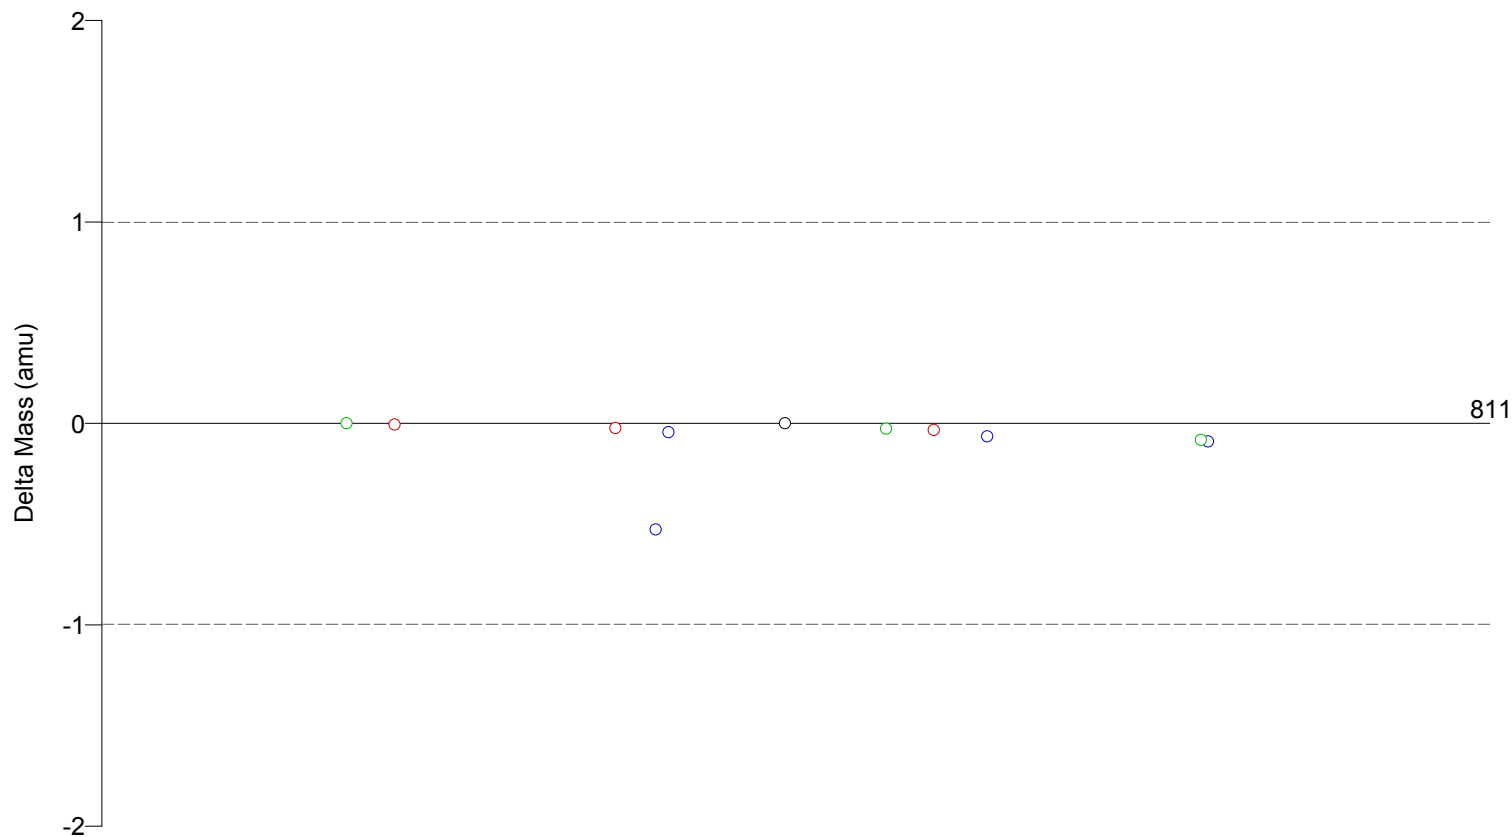

#19287468-1 NL: 1.30E5

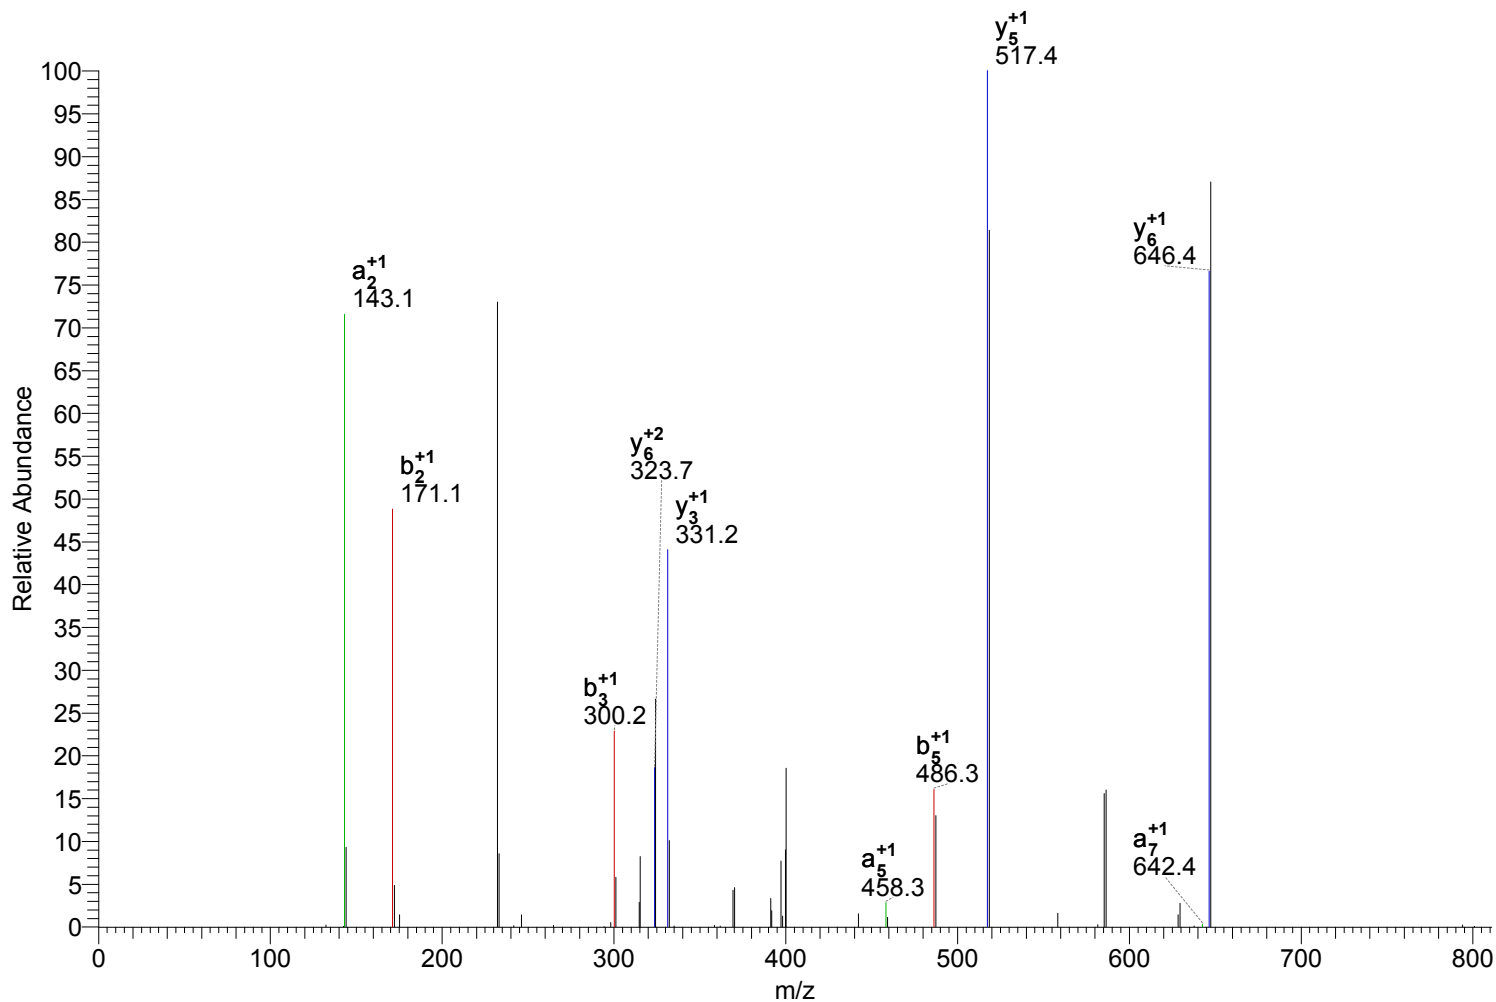



---

| Reference                          |              |        |   | P   | Score | Coverage | Accession |     |       |       |
|------------------------------------|--------------|--------|---|-----|-------|----------|-----------|-----|-------|-------|
| Scan(s)                            | Sequence     | MH+    | z | P   | XC    | DeltaCn  | Sp        | RSp | Ions  | Count |
| IPI:IPI00375359.2 SWISS-PROT:P3525 |              |        |   | 1   | 8.1   | 0.0      | 0         |     |       |       |
| 19287468 - 1                       | K.IGEVSSPK.A | 816.45 | 2 | 0.6 | 2.245 | 0.317    | 420.5     | 3   | 11/21 | 1     |

---

1 of 1 peptide matches reported, 0 removed due to filtering

DTA for scans: 19287468-1  
Precursor ion: 408.72  
Mass type: mono  
Mod's: (M\* +15.99492) C=161.01468

Ion series for charge: +1

| AA | A ions        | B ions        | B* ions | Bo ions | C ions | Y ions        | Y* ions | Yo ions | Z ions |
|----|---------------|---------------|---------|---------|--------|---------------|---------|---------|--------|
| I  | 86.10         | 114.09        |         |         |        |               |         |         |        |
| G  | <b>143.12</b> | <b>171.11</b> |         |         |        | 703.36        |         |         |        |
| E  | 272.16        | <b>300.16</b> |         |         |        | <b>646.34</b> |         |         |        |
| V  | 371.23        | 399.22        |         |         |        | <b>517.30</b> |         |         |        |
| S  | <b>458.26</b> | <b>486.26</b> |         |         |        | 418.23        |         |         |        |
| S  | 545.29        | 573.29        |         |         |        | <b>331.20</b> |         |         |        |
| P  | <b>642.35</b> | 670.34        |         |         |        | 244.17        |         |         |        |
| K  |               |               |         |         |        | 147.11        |         |         |        |



#19287468-1 NL: 1.30E5



---

| Reference                                                      |                  |         |   | P   | Score | Coverage | Accession |     |       |       |
|----------------------------------------------------------------|------------------|---------|---|-----|-------|----------|-----------|-----|-------|-------|
| Scan(s)                                                        | Sequence         | MH+     | z | P   | XC    | DeltaCn  | Sp        | RSp | Ions  | Count |
| IPI:IPI00065348.2 TREMBL:B1AL16;Q05BG6;Q96LW0 ENSEMBL:ENSP0000 |                  |         |   | 1   | 8.1   | 0.0      | 0         |     |       |       |
| 19287468 - 1                                                   | R.LSITGTEQFERK.L | 1408.74 | 2 | 0.7 | 2.224 | 0.498    | 271.7     | 3   | 11/33 | 2     |

---

1 of 1 peptide matches reported, 0 removed due to filtering

DTA for scans: 19287468-1  
Precursor ion: 704.88  
Mass type: mono  
Mod's: (M\* +15.99492) C=161.01468

Ion series for charge: +1

| AA | A ions         | B ions         | B* ions | Bo ions | C ions | Y ions        | Y* ions | Yo ions | Z ions |
|----|----------------|----------------|---------|---------|--------|---------------|---------|---------|--------|
| L  | 86.10          | 114.09         |         |         |        |               |         |         |        |
| S  | 173.13         | 201.12         |         |         |        | 1295.66       |         |         |        |
| I  | 286.21         | 314.21         |         |         |        | 1208.63       |         |         |        |
| T  | 387.26         | 415.26         |         |         |        | 1095.54       |         |         |        |
| G  | 444.28         | 472.28         |         |         |        | 994.50        |         |         |        |
| T  | <b>545.33</b>  | <b>573.32</b>  |         |         |        | 937.47        |         |         |        |
| E  | 674.37         | 702.37         |         |         |        | <b>836.43</b> |         |         |        |
| Q  | 802.43         | <b>830.43</b>  |         |         |        | 707.38        |         |         |        |
| F  | <b>949.50</b>  | <b>977.49</b>  |         |         |        | <b>579.32</b> |         |         |        |
| E  | <b>1078.54</b> | 1106.54        |         |         |        | <b>432.26</b> |         |         |        |
| R  | 1234.64        | <b>1262.64</b> |         |         |        | 303.21        |         |         |        |
| K  |                |                |         |         |        | 147.11        |         |         |        |

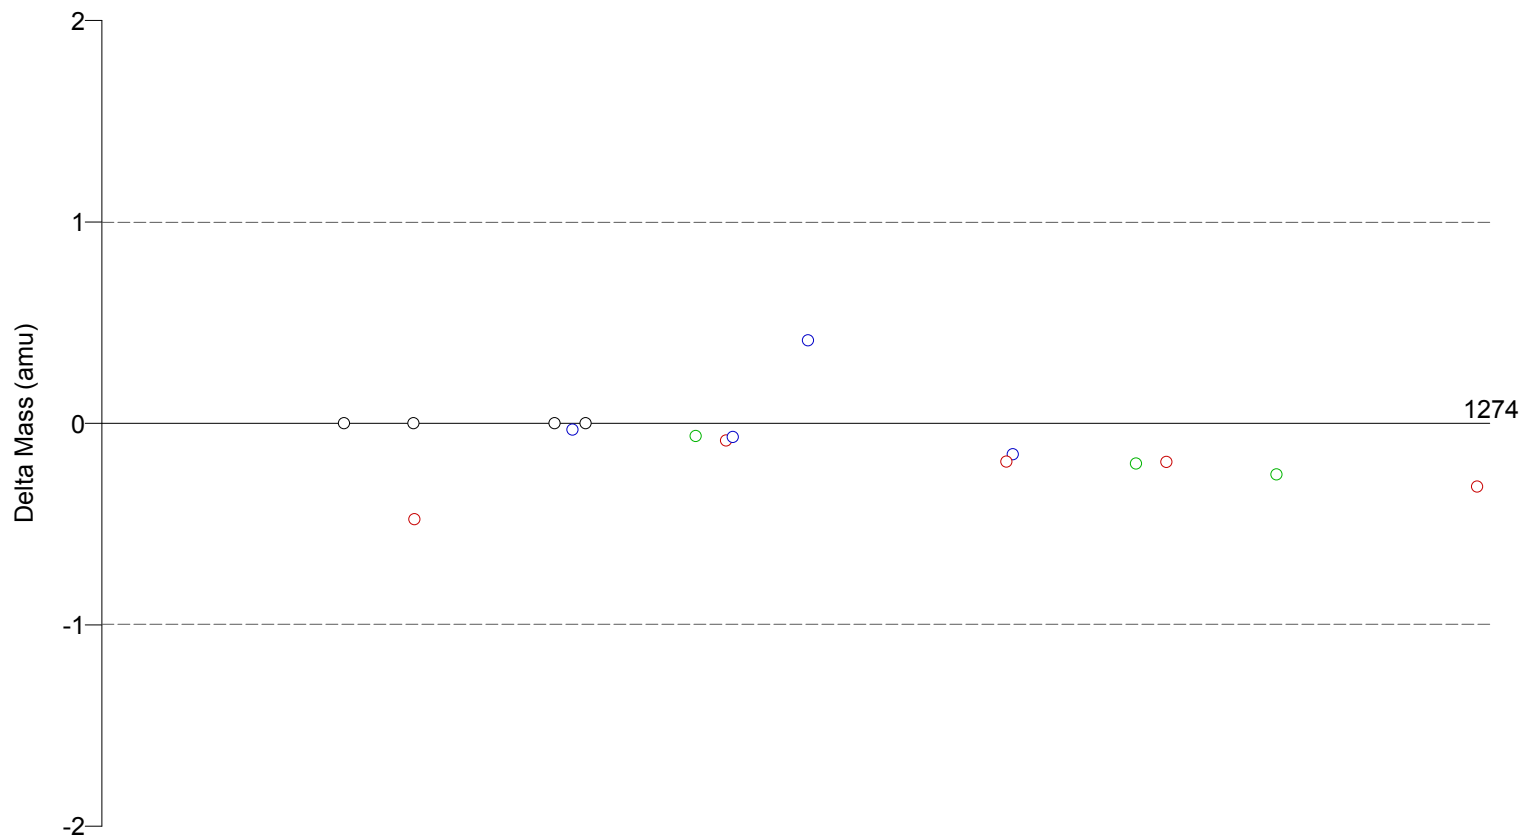

#19287468-1 NL: 6.35E4

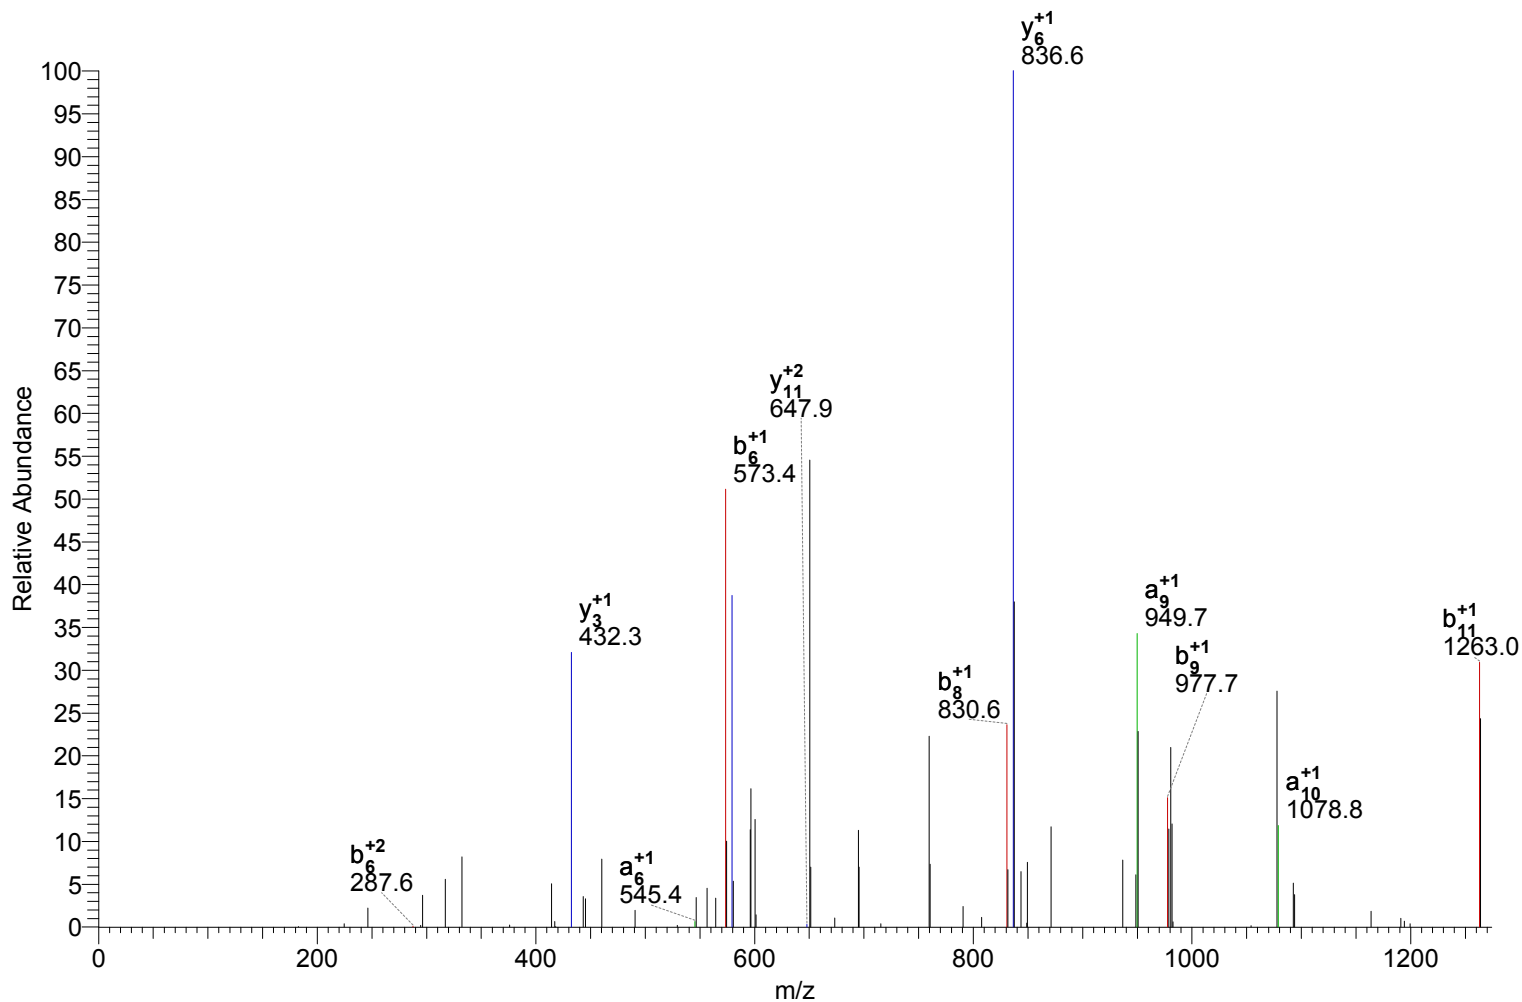

---

| Reference                          |                  |         |   | P   | Score | Coverage | Accession |     |       |       |
|------------------------------------|------------------|---------|---|-----|-------|----------|-----------|-----|-------|-------|
| Scan(s)                            | Sequence         | MH+     | z | P   | XC    | DeltaCn  | Sp        | RSp | Ions  | Count |
| IPI:IPI00293188.5 SWISS-PROT:Q8IX2 |                  |         |   | 1   | 8.1   | 0.0      | 0         |     |       |       |
| 19287468 - 1                       | R.LSITGTEQFERK.L | 1408.74 | 2 | 0.7 | 2.224 | 0.498    | 271.7     | 3   | 11/33 | 2     |

---

1 of 1 peptide matches reported, 0 removed due to filtering

DTA for scans: 19287468-1  
Precursor ion: 704.88  
Mass type: mono  
Mod's: (M\* +15.99492) C=161.01468

Ion series for charge: +1

| AA | A ions         | B ions         | B* ions | Bo ions | C ions | Y ions        | Y* ions | Yo ions | Z ions |
|----|----------------|----------------|---------|---------|--------|---------------|---------|---------|--------|
| L  | 86.10          | 114.09         |         |         |        |               |         |         |        |
| S  | 173.13         | 201.12         |         |         |        | 1295.66       |         |         |        |
| I  | 286.21         | 314.21         |         |         |        | 1208.63       |         |         |        |
| T  | 387.26         | 415.26         |         |         |        | 1095.54       |         |         |        |
| G  | 444.28         | 472.28         |         |         |        | 994.50        |         |         |        |
| T  | <b>545.33</b>  | <b>573.32</b>  |         |         |        | 937.47        |         |         |        |
| E  | 674.37         | 702.37         |         |         |        | <b>836.43</b> |         |         |        |
| Q  | 802.43         | <b>830.43</b>  |         |         |        | 707.38        |         |         |        |
| F  | <b>949.50</b>  | <b>977.49</b>  |         |         |        | <b>579.32</b> |         |         |        |
| E  | <b>1078.54</b> | 1106.54        |         |         |        | <b>432.26</b> |         |         |        |
| R  | 1234.64        | <b>1262.64</b> |         |         |        | 303.21        |         |         |        |
| K  |                |                |         |         |        | 147.11        |         |         |        |



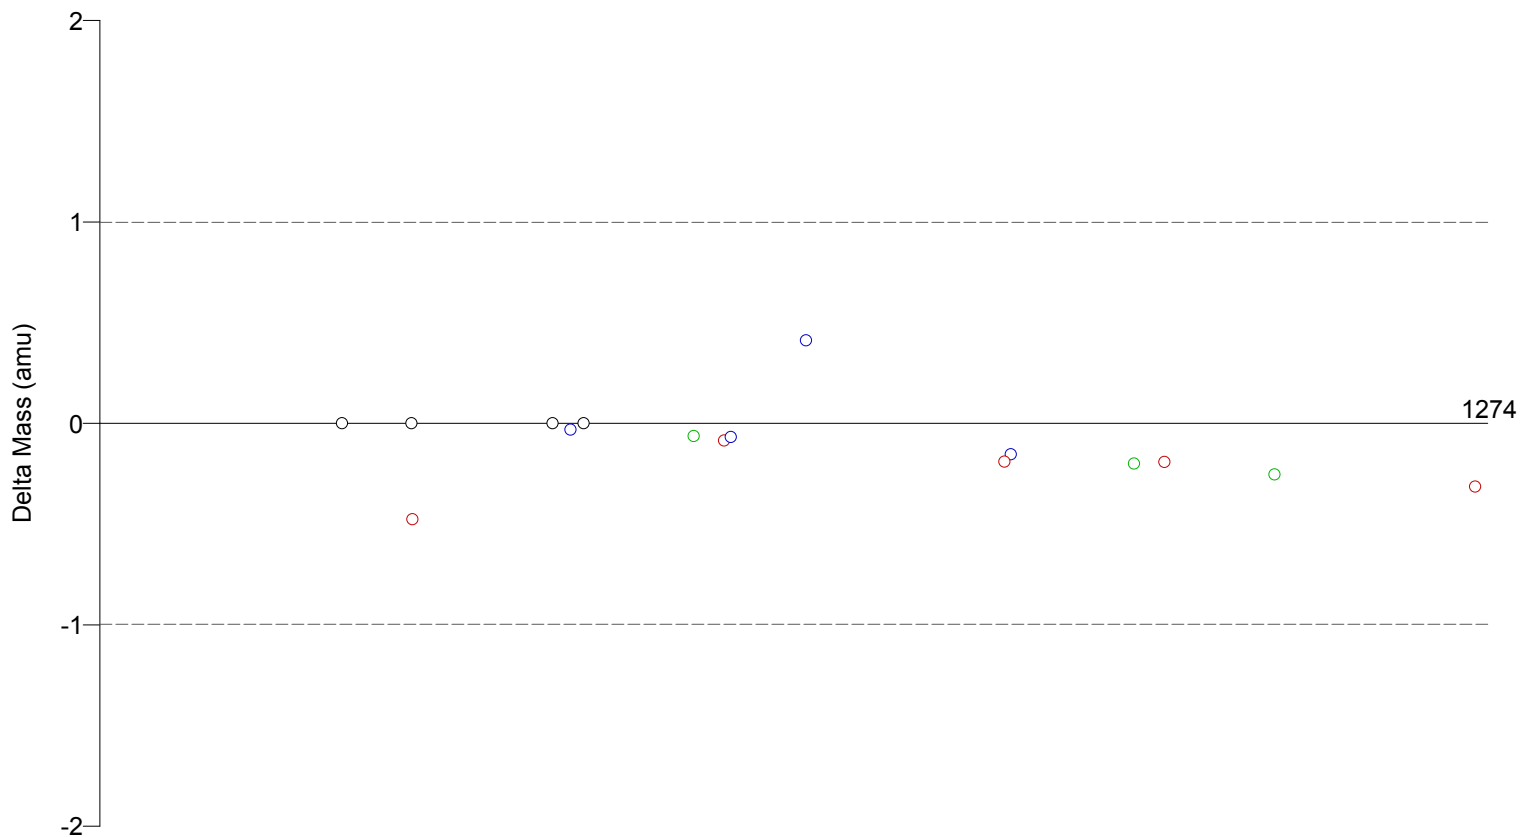

#19287468-1 NL: 6.35E4



---

| Reference                          |                  |         |   | P   | Score | Coverage | Accession |     |       |       |
|------------------------------------|------------------|---------|---|-----|-------|----------|-----------|-----|-------|-------|
| Scan(s)                            | Sequence         | MH+     | z | P   | XC    | DeltaCn  | Sp        | RSp | Ions  | Count |
| IPI:IPI00640126.1 TREMBL:B1AL17 EN |                  |         |   | 1   | 8.1   | 0.0      | 0         |     |       |       |
| 19287468 - 1                       | R.LSITGTEQFERK.L | 1408.74 | 2 | 0.7 | 2.224 | 0.498    | 271.7     | 3   | 11/33 | 2     |

1 of 1 peptide matches reported, 0 removed due to filtering

DTA for scans: 19287468-1  
Precursor ion: 704.88  
Mass type: mono  
Mod's: (M\* +15.99492) C=161.01468

Ion series for charge: +1

| AA | A ions         | B ions         | B* ions | Bo ions | C ions | Y ions        | Y* ions | Yo ions | Z ions |
|----|----------------|----------------|---------|---------|--------|---------------|---------|---------|--------|
| L  | 86.10          | 114.09         |         |         |        |               |         |         |        |
| S  | 173.13         | 201.12         |         |         |        | 1295.66       |         |         |        |
| I  | 286.21         | 314.21         |         |         |        | 1208.63       |         |         |        |
| T  | 387.26         | 415.26         |         |         |        | 1095.54       |         |         |        |
| G  | 444.28         | 472.28         |         |         |        | 994.50        |         |         |        |
| T  | <b>545.33</b>  | <b>573.32</b>  |         |         |        | 937.47        |         |         |        |
| E  | 674.37         | 702.37         |         |         |        | <b>836.43</b> |         |         |        |
| Q  | 802.43         | <b>830.43</b>  |         |         |        | 707.38        |         |         |        |
| F  | <b>949.50</b>  | <b>977.49</b>  |         |         |        | <b>579.32</b> |         |         |        |
| E  | <b>1078.54</b> | 1106.54        |         |         |        | <b>432.26</b> |         |         |        |
| R  | 1234.64        | <b>1262.64</b> |         |         |        | 303.21        |         |         |        |
| K  |                |                |         |         |        | 147.11        |         |         |        |



#19287468-1 NL: 6.35E4



---

| Reference                                                      |          |         |   | P   | Score | Coverage | Accession |     |      |       |
|----------------------------------------------------------------|----------|---------|---|-----|-------|----------|-----------|-----|------|-------|
| Scan(s)                                                        | Sequence | MH+     | z | P   | XC    | DeltaCn  | Sp        | RSp | Ions | Count |
| IPI:IPI00217895.4 SWISS-PROT:Q6S5L8-1 TREMBL:B3KWT2 ENSEMBL:EN |          |         |   | 1   | 8.1   | 0.0      |           | 0   |      |       |
| 2118291816 - K.SNLQFSGMNIK.L                                   |          | 1238.62 | 2 | 0.8 | 2.210 | 0.498    | 104.6     | 16  | 8/30 |       |

---

1 of 1 peptide matches reported, 0 removed due to filtering

DTA for scans: 2118291816-26226248  
Precursor ion: 619.82  
Mass type: mono  
Mod's: (M\* +15.99492) C=161.01468

Ion series for charge: +1

| AA | A ions         | B ions        | B* ions | Bo ions | C ions | Y ions        | Y* ions | Yo ions | Z ions |
|----|----------------|---------------|---------|---------|--------|---------------|---------|---------|--------|
| S  | 60.04          | 88.04         |         |         |        |               |         |         |        |
| N  | 174.09         | 202.08        |         |         |        | 1151.59       |         |         |        |
| L  | 287.17         | 315.17        |         |         |        | 1037.54       |         |         |        |
| Q  | 415.23         | 443.22        |         |         |        | <b>924.46</b> |         |         |        |
| F  | 562.30         | 590.29        |         |         |        | <b>796.40</b> |         |         |        |
| S  | 649.33         | <b>677.33</b> |         |         |        | 649.33        |         |         |        |
| G  | 706.35         | <b>734.35</b> |         |         |        | 562.30        |         |         |        |
| M  | <b>837.39</b>  | <b>865.39</b> |         |         |        | 505.28        |         |         |        |
| N  | 951.44         | 979.43        |         |         |        | <b>374.24</b> |         |         |        |
| I  | <b>1064.52</b> | 1092.51       |         |         |        | 260.20        |         |         |        |
| K  |                |               |         |         |        | 147.11        |         |         |        |

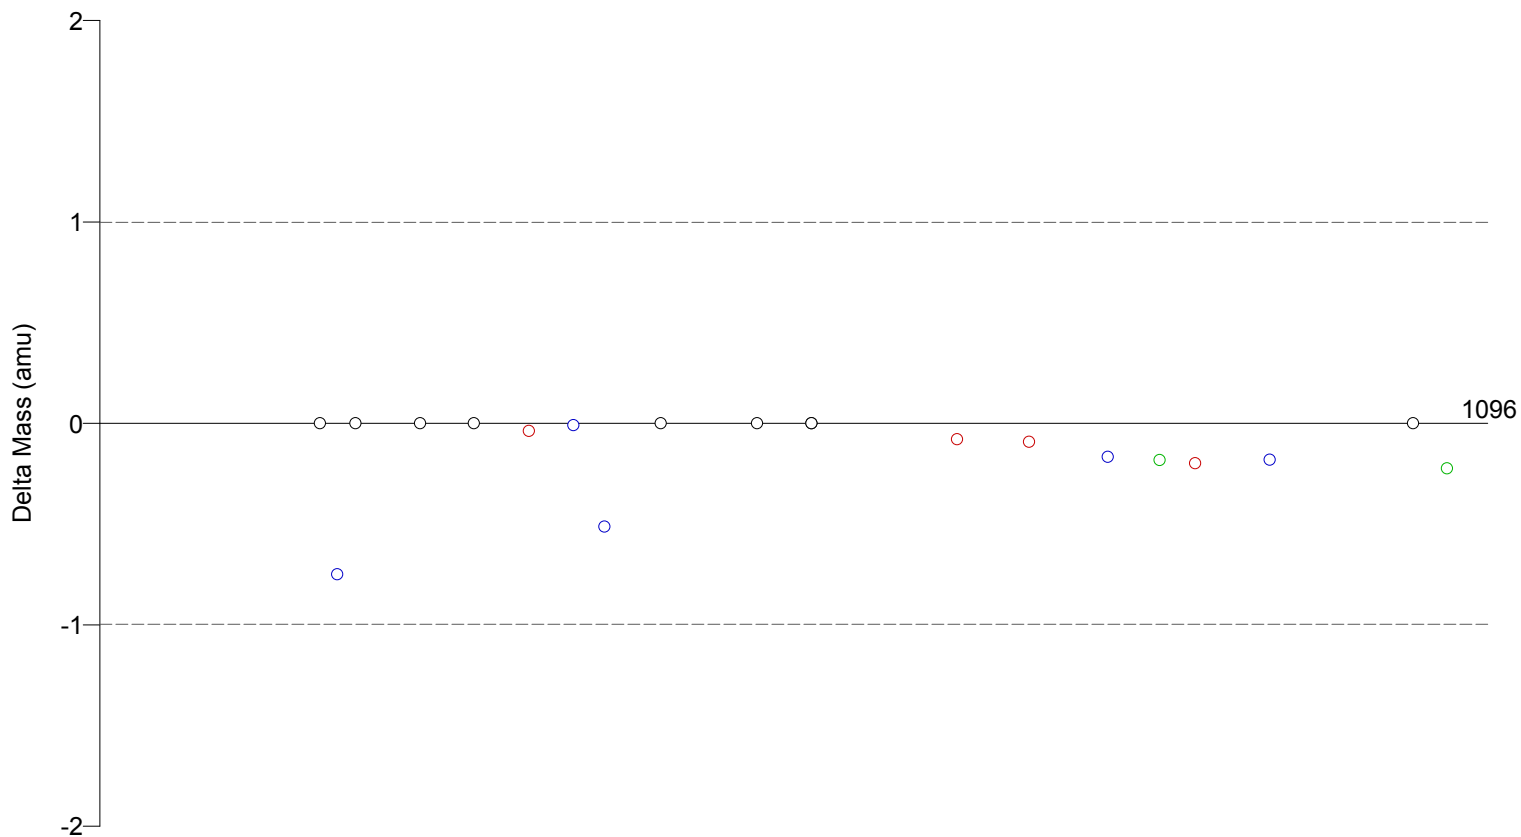

#2118291816-26226248 NL: 2.79E5

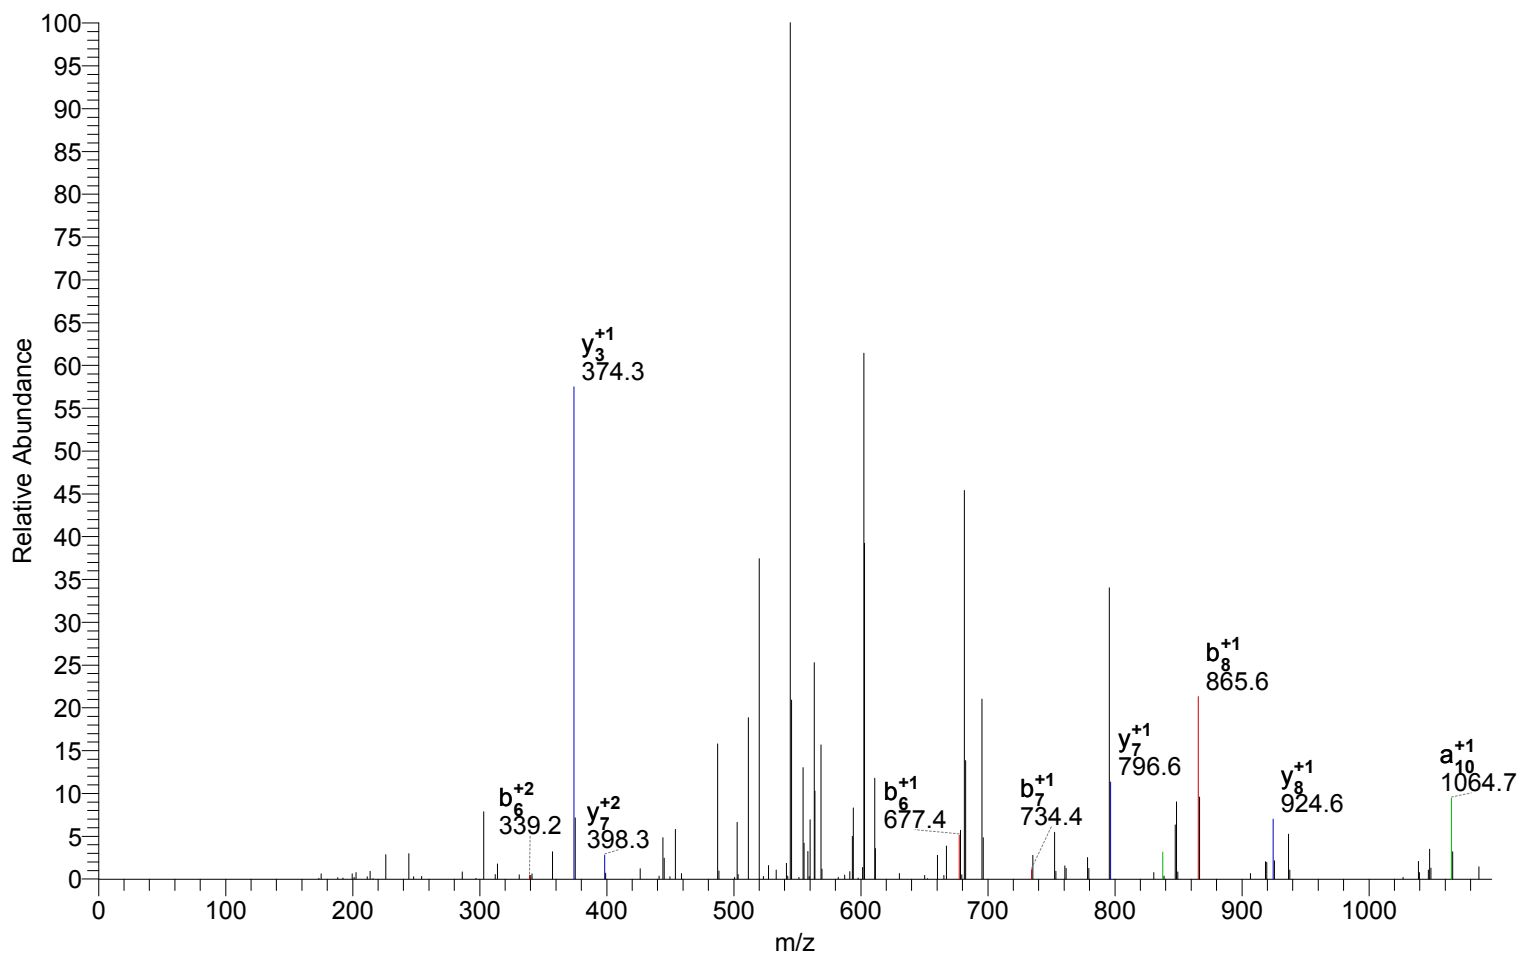

---

| Reference                                                      |              |        |   | P   | Score | Coverage | Accession |     |       |       |
|----------------------------------------------------------------|--------------|--------|---|-----|-------|----------|-----------|-----|-------|-------|
| Scan(s)                                                        | Sequence     | MH+    | z | P   | XC    | DeltaCn  | Sp        | RSp | Ions  | Count |
| IPI:IPI00043430.5 SWISS-PROT:Q8IUR5-2 TREMBL:B3KVV1 ENSEMBL:EN |              |        |   | 1   | 8.1   | 0.0      | 0         |     |       |       |
| 19287468 - 1                                                   | R.LLSAIYSK.Q | 894.53 | 2 | 0.8 | 2.159 | 0.253    | 634.7     | 2   | 13/21 | 2     |

---

1 of 1 peptide matches reported, 0 removed due to filtering



DTA for scans: 19287468-1  
Precursor ion: 447.76  
Mass type: mono  
Mod's: (M\* +15.99492) C=161.01468

Ion series for charge: +1

| AA | A ions        | B ions        | B* ions | Bo ions | C ions | Y ions        | Y* ions | Yo ions | Z ions |
|----|---------------|---------------|---------|---------|--------|---------------|---------|---------|--------|
| L  | 86.10         | <b>114.09</b> |         |         |        |               |         |         |        |
| L  | <b>199.18</b> | 227.18        |         |         |        | 781.45        |         |         |        |
| S  | 286.21        | 314.21        |         |         |        | 668.36        |         |         |        |
| A  | 357.25        | <b>385.24</b> |         |         |        | 581.33        |         |         |        |
| I  | <b>470.33</b> | <b>498.33</b> |         |         |        | <b>510.29</b> |         |         |        |
| Y  | <b>633.40</b> | <b>661.39</b> |         |         |        | <b>397.21</b> |         |         |        |
| S  | <b>720.43</b> | <b>748.42</b> |         |         |        | <b>234.14</b> |         |         |        |
| K  |               |               |         |         |        | <b>147.11</b> |         |         |        |

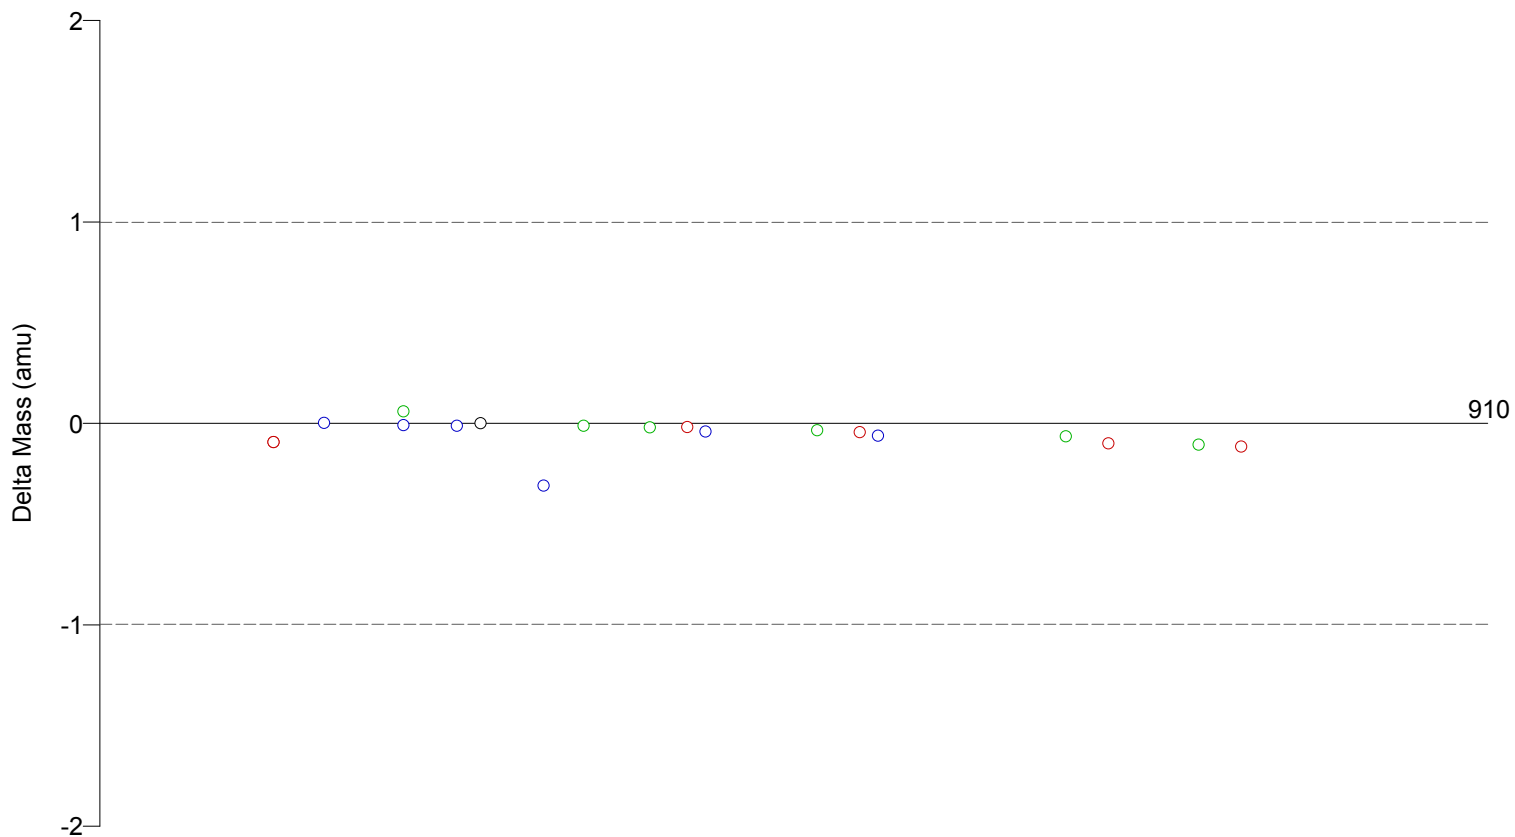

#19287468-1 NL: 1.39E5

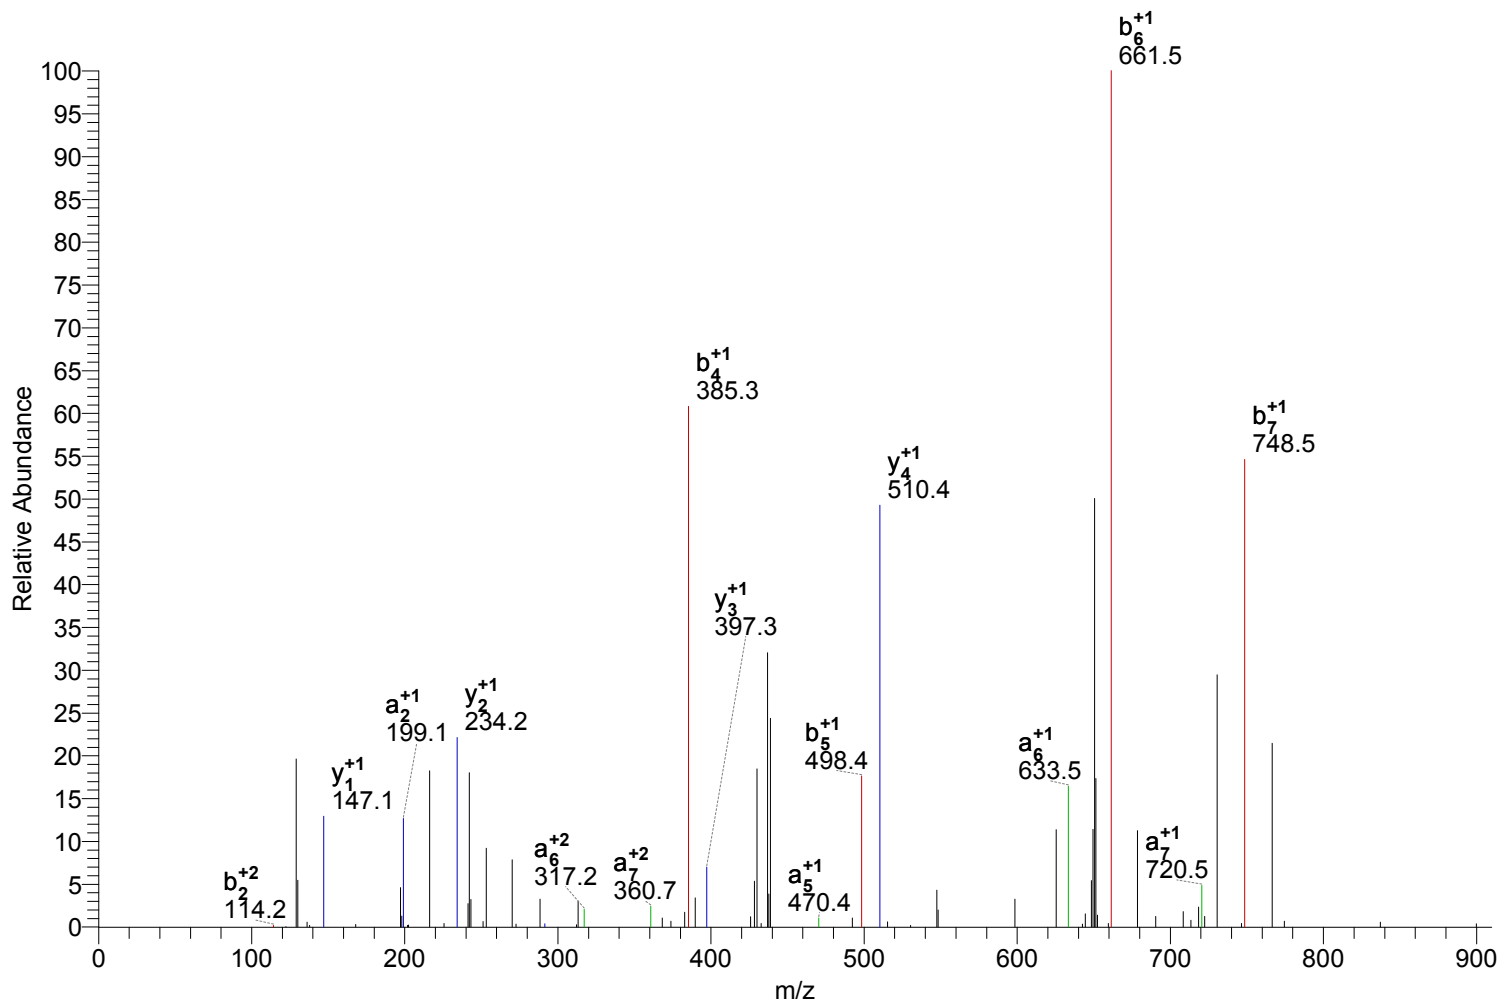

---

| Reference                          |              |        |   | P   | Score | Coverage | Accession |     |       |       |
|------------------------------------|--------------|--------|---|-----|-------|----------|-----------|-----|-------|-------|
| Scan(s)                            | Sequence     | MH+    | z | P   | XC    | DeltaCn  | Sp        | RSp | Ions  | Count |
| IPI:IPI00216822.3 SWISS-PROT:Q8IUR |              |        |   | 1   | 8.1   | 0.0      | 0         |     |       |       |
| 19287468 - 1                       | R.LLSAIYSK.Q | 894.53 | 2 | 0.8 | 2.159 | 0.253    | 634.7     | 2   | 13/21 | 2     |

---

1 of 1 peptide matches reported, 0 removed due to filtering

DTA for scans: 19287468-1  
Precursor ion: 447.76  
Mass type: mono  
Mod's: (M\* +15.99492) C=161.01468

Ion series for charge: +1

| AA | A ions        | B ions        | B* ions | Bo ions | C ions | Y ions        | Y* ions | Yo ions | Z ions |
|----|---------------|---------------|---------|---------|--------|---------------|---------|---------|--------|
| L  | 86.10         | <b>114.09</b> |         |         |        |               |         |         |        |
| L  | <b>199.18</b> | 227.18        |         |         |        | 781.45        |         |         |        |
| S  | 286.21        | 314.21        |         |         |        | 668.36        |         |         |        |
| A  | 357.25        | <b>385.24</b> |         |         |        | 581.33        |         |         |        |
| I  | <b>470.33</b> | <b>498.33</b> |         |         |        | <b>510.29</b> |         |         |        |
| Y  | <b>633.40</b> | <b>661.39</b> |         |         |        | <b>397.21</b> |         |         |        |
| S  | <b>720.43</b> | <b>748.42</b> |         |         |        | <b>234.14</b> |         |         |        |
| K  |               |               |         |         |        | <b>147.11</b> |         |         |        |

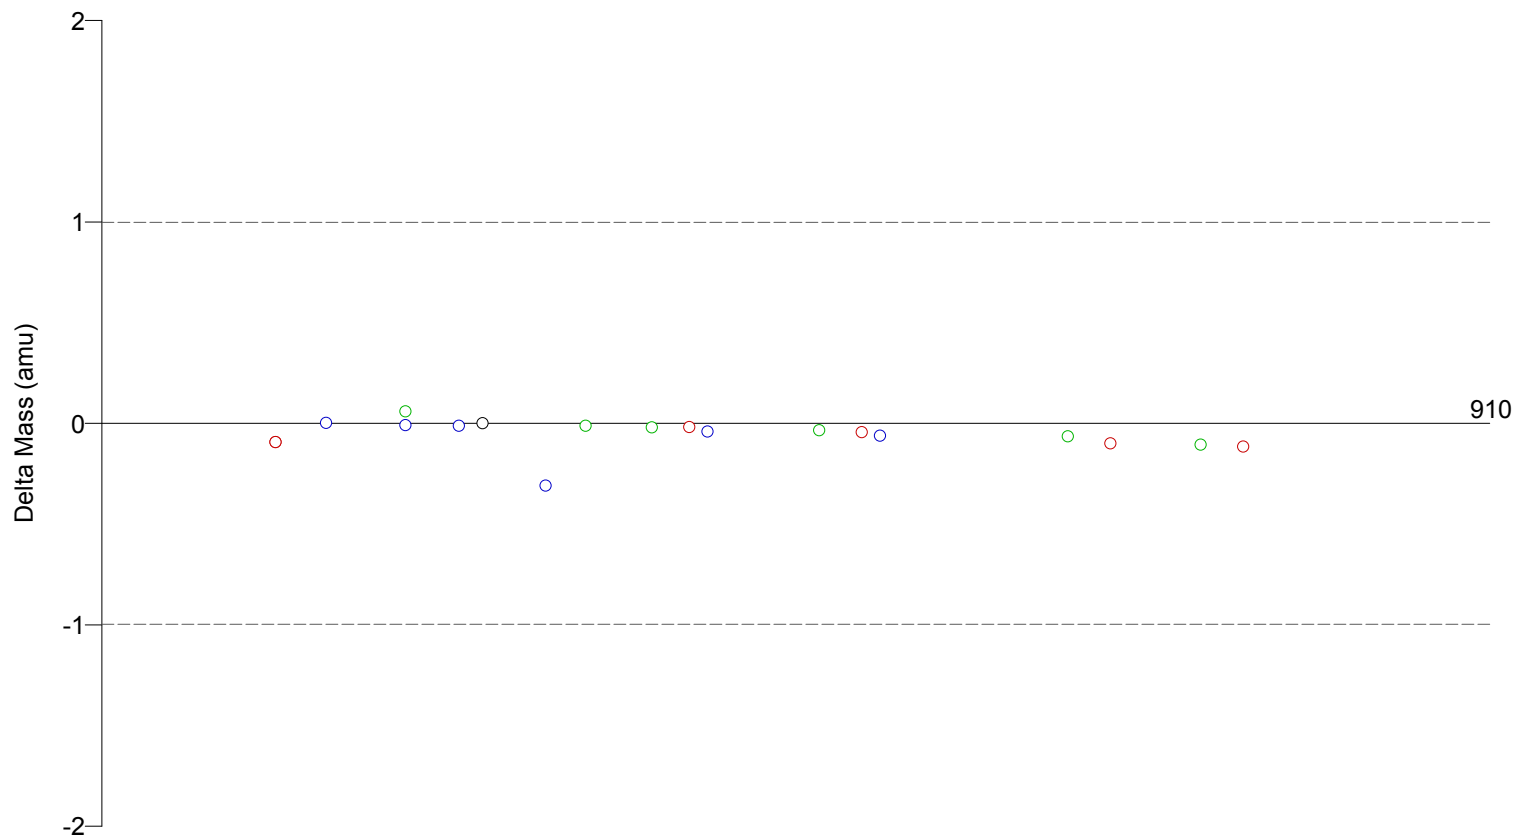

#19287468-1 NL: 1.39E5

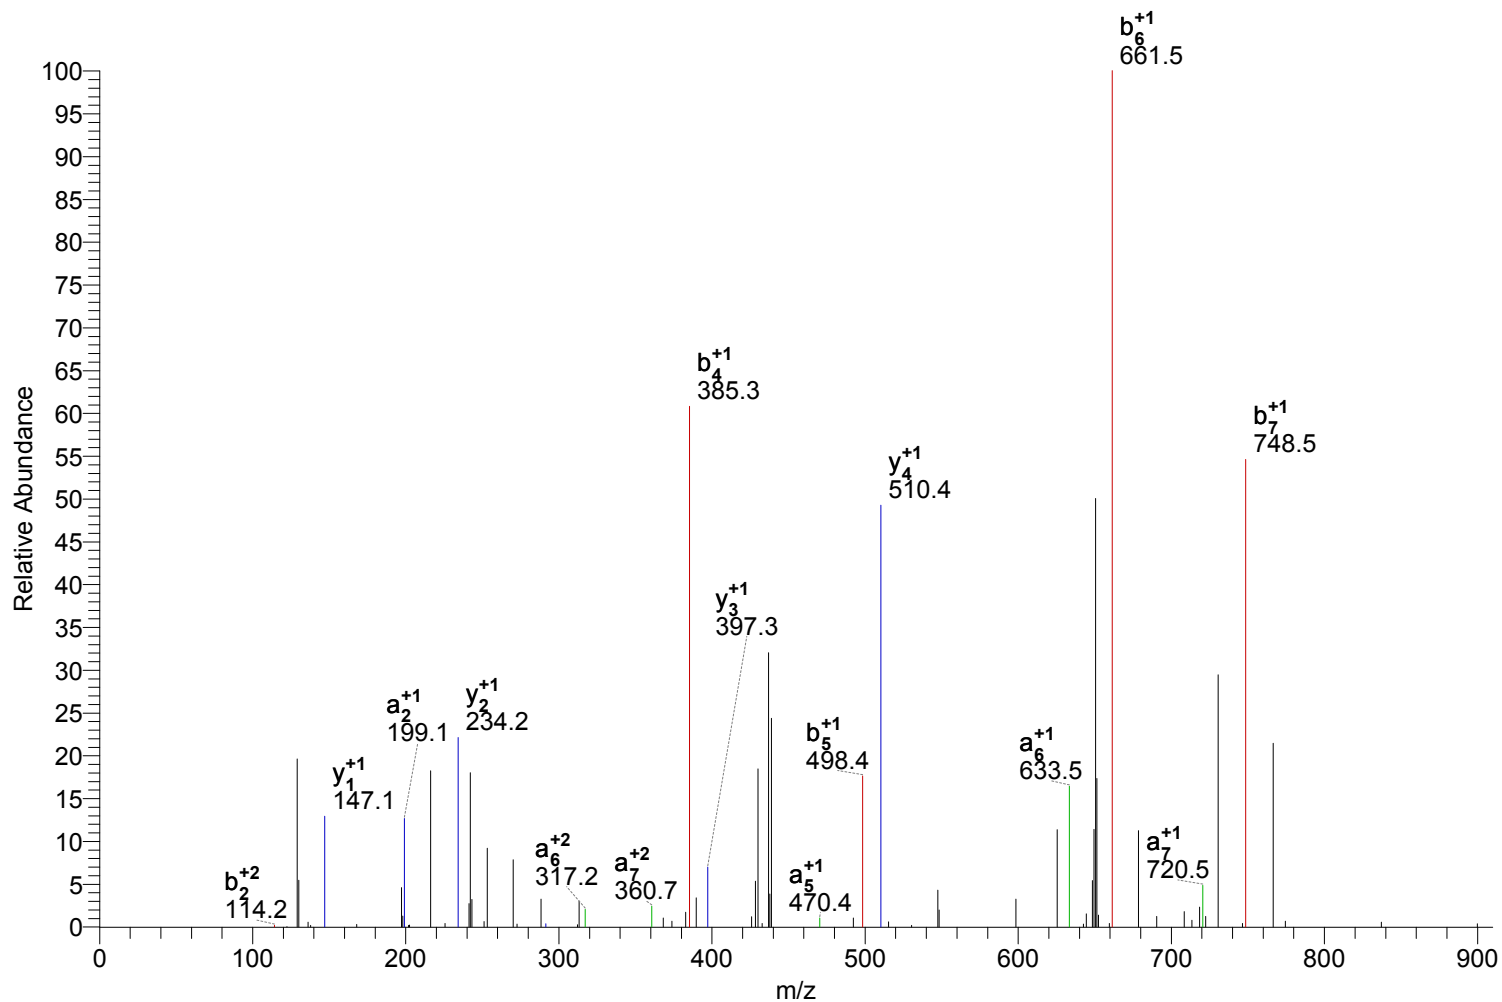

---

| Reference                          |              |        |   | P   | Score | Coverage | Accession |     |       |       |
|------------------------------------|--------------|--------|---|-----|-------|----------|-----------|-----|-------|-------|
| Scan(s)                            | Sequence     | MH+    | z | P   | XC    | DeltaCn  | Sp        | RSp | Ions  | Count |
| IPI:IPI00795924.2 SWISS-PROT:Q8IUR |              |        |   | 1   | 8.1   | 0.0      | 0         |     |       |       |
| 19287468 - 1                       | R.LLSAIYSK.Q | 894.53 | 2 | 0.8 | 2.159 | 0.253    | 634.7     | 2   | 13/21 | 2     |

---

1 of 1 peptide matches reported, 0 removed due to filtering

DTA for scans: 19287468-1  
Precursor ion: 447.76  
Mass type: mono  
Mod's: (M\* +15.99492) C=161.01468

Ion series for charge: +1

| AA | A ions        | B ions        | B* ions | Bo ions | C ions | Y ions        | Y* ions | Yo ions | Z ions |
|----|---------------|---------------|---------|---------|--------|---------------|---------|---------|--------|
| L  | 86.10         | <b>114.09</b> |         |         |        |               |         |         |        |
| L  | <b>199.18</b> | 227.18        |         |         |        | 781.45        |         |         |        |
| S  | 286.21        | 314.21        |         |         |        | 668.36        |         |         |        |
| A  | 357.25        | <b>385.24</b> |         |         |        | 581.33        |         |         |        |
| I  | <b>470.33</b> | <b>498.33</b> |         |         |        | <b>510.29</b> |         |         |        |
| Y  | <b>633.40</b> | <b>661.39</b> |         |         |        | <b>397.21</b> |         |         |        |
| S  | <b>720.43</b> | <b>748.42</b> |         |         |        | <b>234.14</b> |         |         |        |
| K  |               |               |         |         |        | <b>147.11</b> |         |         |        |



#19287468-1 NL: 1.39E5





---

| Reference                                                     |                 |         |   | P   | Score | Coverage | Accession |     |       |       |
|---------------------------------------------------------------|-----------------|---------|---|-----|-------|----------|-----------|-----|-------|-------|
| Scan(s)                                                       | Sequence        | MH+     | z | P   | XC    | DeltaCn  | Sp        | RSp | Ions  | Count |
| IPI:IPI00433499.6 SWISS-PROT:Q6PJF5-1 ENSEMBL:ENSP00000322775 |                 |         |   | 1   | 8.1   | 0.0      | 0         |     |       |       |
| 19287468 - 1                                                  | K.EYGRAPVPGPR.R | 1198.63 | 2 | 0.8 | 2.135 | 0.461    | 245.0     | 3   | 11/30 | 3     |

---

1 of 1 peptide matches reported, 0 removed due to filtering

DTA for scans: 19287468-1  
Precursor ion: 599.82  
Mass type: mono  
Mod's: (M\* +15.99492) C=161.01468

Ion series for charge: +1

| AA | A ions        | B ions        | B* ions | Bo ions | C ions | Y ions        | Y* ions | Yo ions | Z ions |
|----|---------------|---------------|---------|---------|--------|---------------|---------|---------|--------|
| E  | 102.05        | 130.05        |         |         |        |               |         |         |        |
| Y  | 265.12        | 293.11        |         |         |        | 1069.59       |         |         |        |
| G  | <b>322.14</b> | <b>350.13</b> |         |         |        | 906.53        |         |         |        |
| R  | <b>478.24</b> | <b>506.24</b> |         |         |        | <b>849.51</b> |         |         |        |
| A  | <b>549.28</b> | <b>577.27</b> |         |         |        | <b>693.40</b> |         |         |        |
| P  | <b>646.33</b> | 674.33        |         |         |        | <b>622.37</b> |         |         |        |
| V  | 745.40        | 773.39        |         |         |        | 525.31        |         |         |        |
| P  | 842.45        | 870.45        |         |         |        | 426.25        |         |         |        |
| G  | 899.47        | 927.47        |         |         |        | 329.19        |         |         |        |
| P  | 996.53        | 1024.52       |         |         |        | 272.17        |         |         |        |
| R  |               |               |         |         |        | 175.12        |         |         |        |

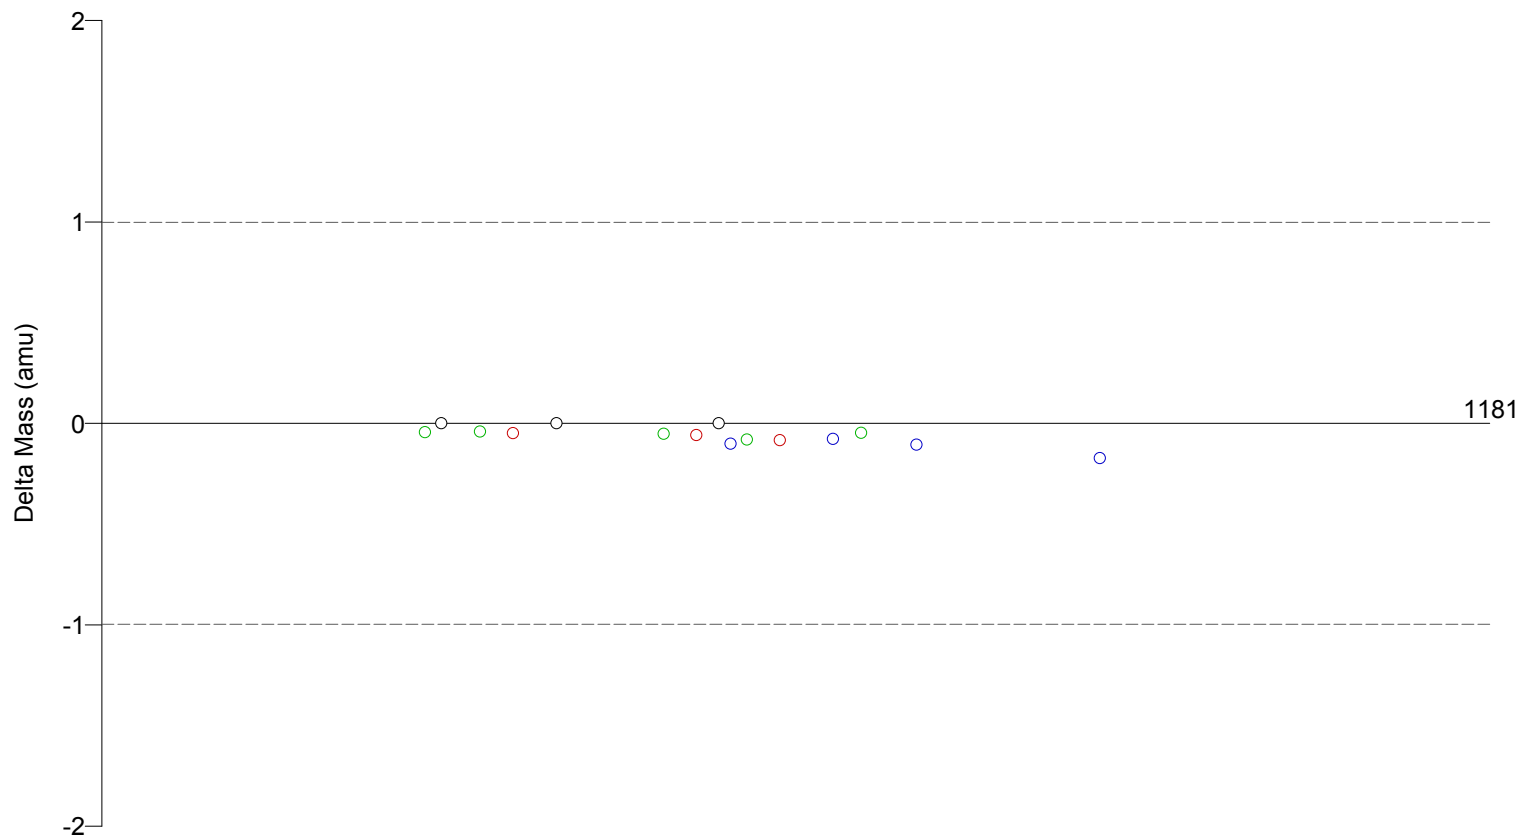

#19287468-1 NL: 2.47E6

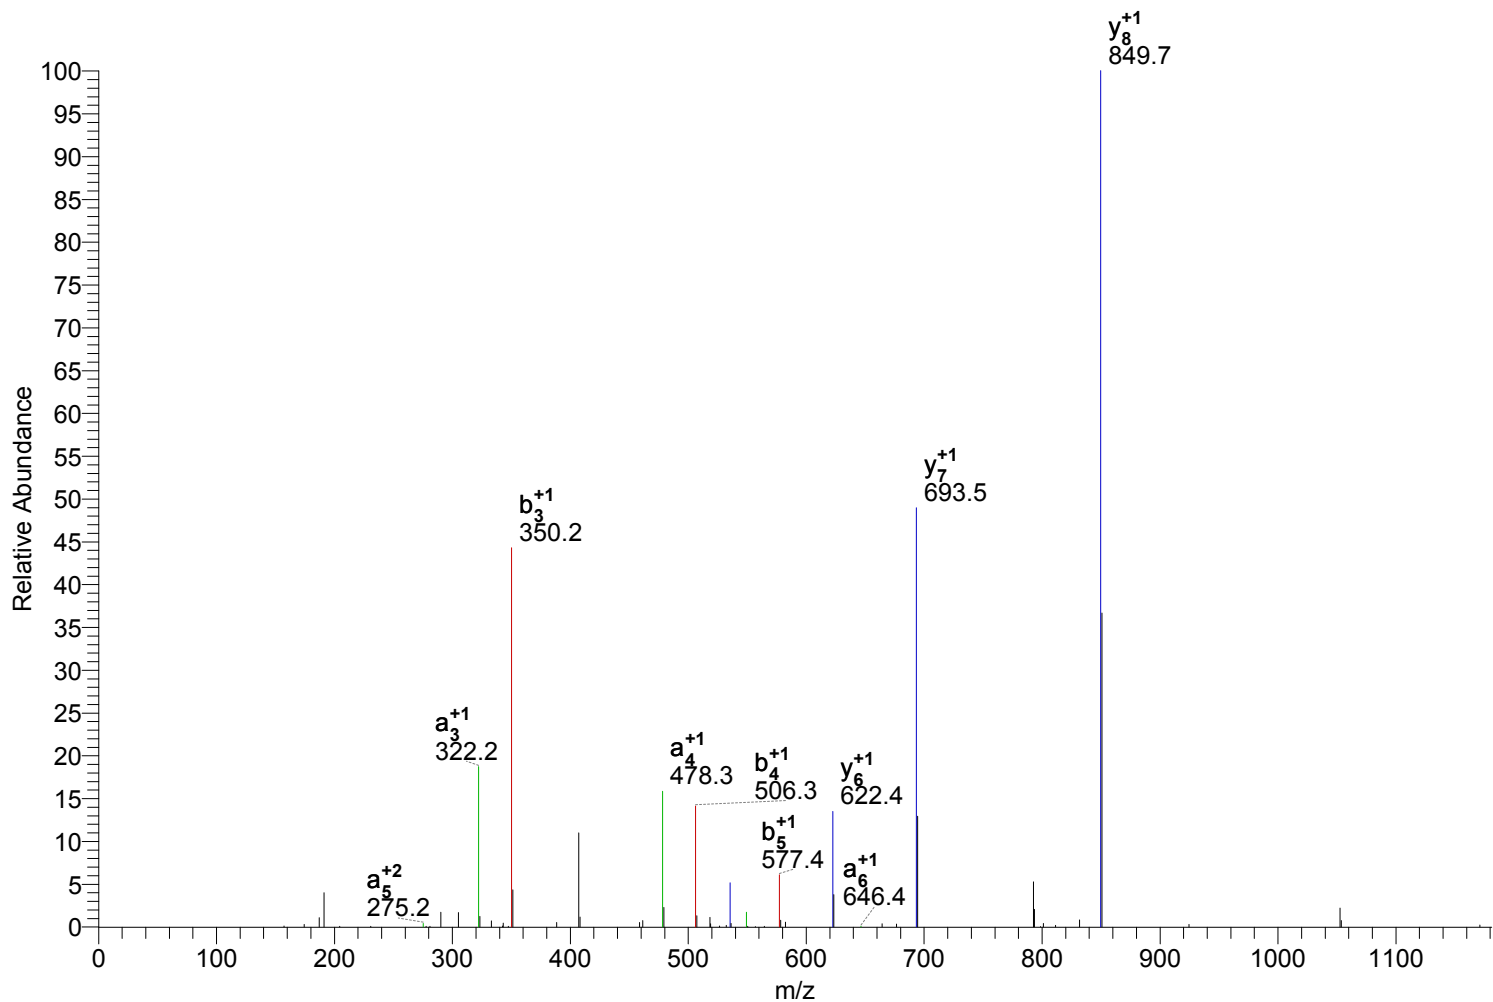

---

| Reference                          |                 |         |   | P   | Score | Coverage | Accession |     |       |       |
|------------------------------------|-----------------|---------|---|-----|-------|----------|-----------|-----|-------|-------|
| Scan(s)                            | Sequence        | MH+     | z | P   | XC    | DeltaCn  | Sp        | RSp | Ions  | Count |
| IPI:IPI00446876.3 TREMBL:Q6ZWP8 EN |                 |         |   | 1   | 8.1   | 0.0      | 0         |     |       |       |
| 19287468 - 1                       | K.EYGRAPVFGPR.R | 1198.63 | 2 | 0.8 | 2.135 | 0.461    | 245.0     | 3   | 11/30 | 3     |

---

1 of 1 peptide matches reported, 0 removed due to filtering

DTA for scans: 19287468-1  
Precursor ion: 599.82  
Mass type: mono  
Mod's: (M\* +15.99492) C=161.01468

Ion series for charge: +1

| AA | A ions        | B ions        | B* ions | Bo ions | C ions | Y ions        | Y* ions | Yo ions | Z ions |
|----|---------------|---------------|---------|---------|--------|---------------|---------|---------|--------|
| E  | 102.05        | 130.05        |         |         |        |               |         |         |        |
| Y  | 265.12        | 293.11        |         |         |        | 1069.59       |         |         |        |
| G  | <b>322.14</b> | <b>350.13</b> |         |         |        | 906.53        |         |         |        |
| R  | <b>478.24</b> | <b>506.24</b> |         |         |        | <b>849.51</b> |         |         |        |
| A  | <b>549.28</b> | <b>577.27</b> |         |         |        | <b>693.40</b> |         |         |        |
| P  | <b>646.33</b> | 674.33        |         |         |        | <b>622.37</b> |         |         |        |
| V  | 745.40        | 773.39        |         |         |        | 525.31        |         |         |        |
| P  | 842.45        | 870.45        |         |         |        | 426.25        |         |         |        |
| G  | 899.47        | 927.47        |         |         |        | 329.19        |         |         |        |
| P  | 996.53        | 1024.52       |         |         |        | 272.17        |         |         |        |
| R  |               |               |         |         |        | 175.12        |         |         |        |

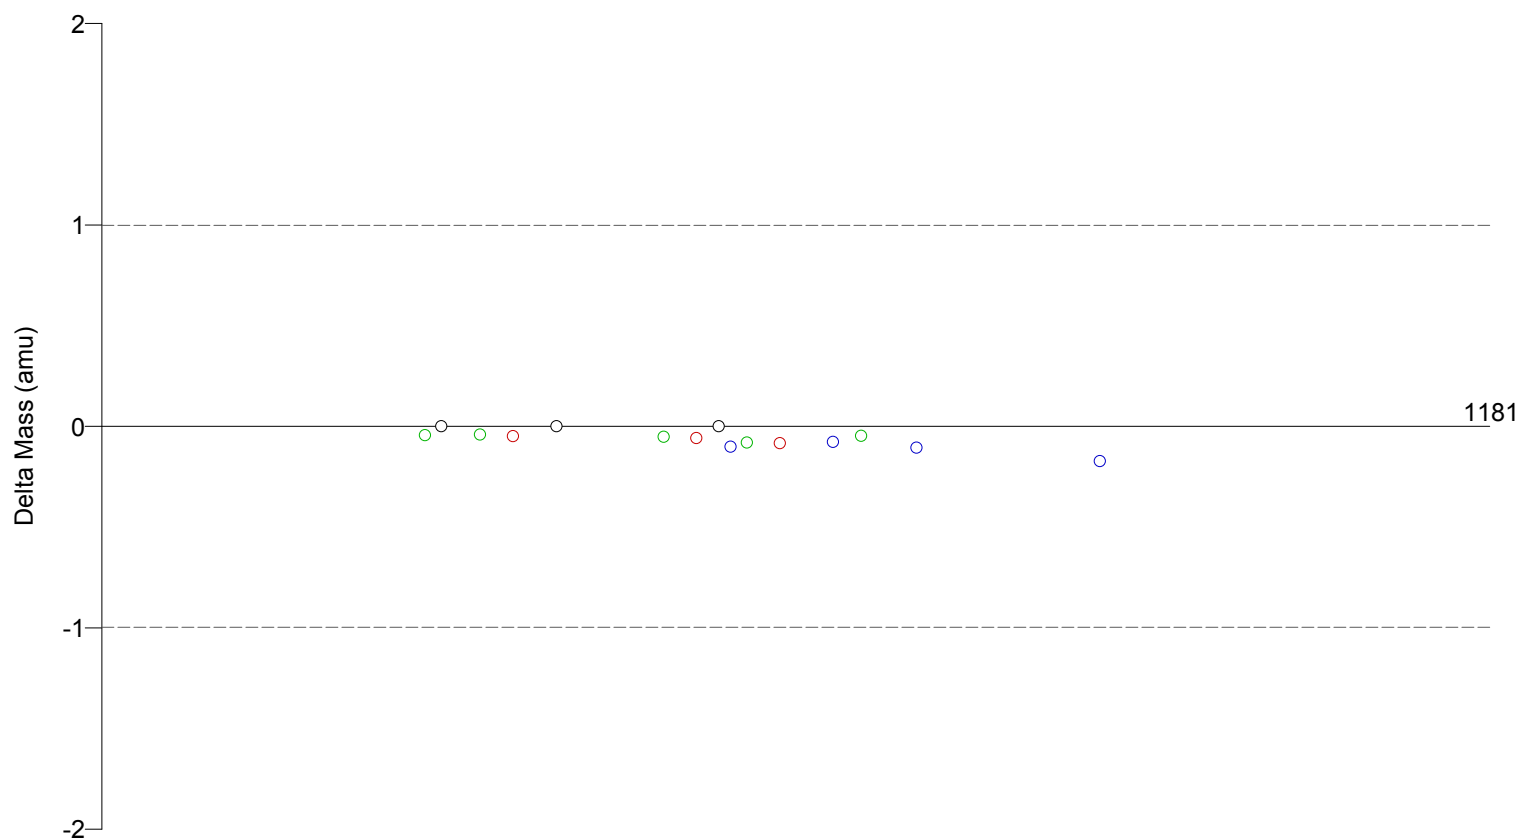

#19287468-1 NL: 2.47E6

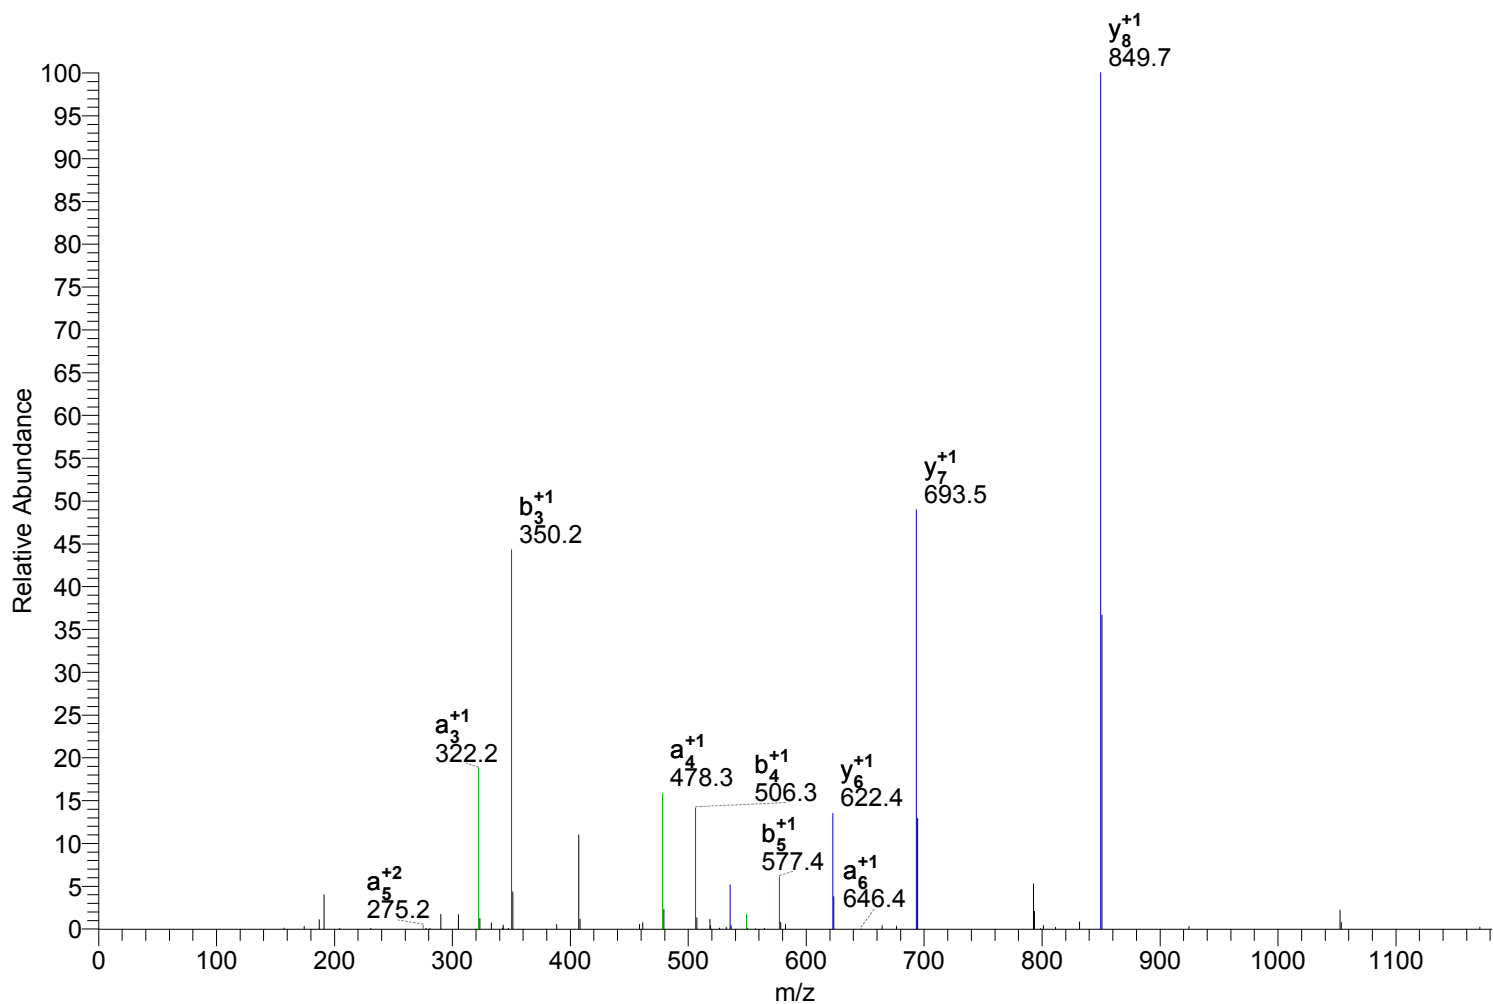

---

| Reference                          |                 |         |   | P   | Score | Coverage | Accession |     |       |       |
|------------------------------------|-----------------|---------|---|-----|-------|----------|-----------|-----|-------|-------|
| Scan(s)                            | Sequence        | MH+     | z | P   | XC    | DeltaCn  | Sp        | RSp | Ions  | Count |
| IPI:IPI00470604.2 SWISS-PROT:Q6PJF |                 |         |   | 1   | 8.1   | 0.0      | 0         |     |       |       |
| 19287468 - 1                       | K.EYGRAPVPGPR.R | 1198.63 | 2 | 0.8 | 2.135 | 0.461    | 245.0     | 3   | 11/30 | 3     |

---

1 of 1 peptide matches reported, 0 removed due to filtering

DTA for scans: 19287468-1  
Precursor ion: 599.82  
Mass type: mono  
Mod's: (M\* +15.99492) C=161.01468

Ion series for charge: +1

| AA | A ions        | B ions        | B* ions | Bo ions | C ions | Y ions        | Y* ions | Yo ions | Z ions |
|----|---------------|---------------|---------|---------|--------|---------------|---------|---------|--------|
| E  | 102.05        | 130.05        |         |         |        |               |         |         |        |
| Y  | 265.12        | 293.11        |         |         |        | 1069.59       |         |         |        |
| G  | <b>322.14</b> | <b>350.13</b> |         |         |        | 906.53        |         |         |        |
| R  | <b>478.24</b> | <b>506.24</b> |         |         |        | <b>849.51</b> |         |         |        |
| A  | <b>549.28</b> | <b>577.27</b> |         |         |        | <b>693.40</b> |         |         |        |
| P  | <b>646.33</b> | 674.33        |         |         |        | <b>622.37</b> |         |         |        |
| V  | 745.40        | 773.39        |         |         |        | 525.31        |         |         |        |
| P  | 842.45        | 870.45        |         |         |        | 426.25        |         |         |        |
| G  | 899.47        | 927.47        |         |         |        | 329.19        |         |         |        |
| P  | 996.53        | 1024.52       |         |         |        | 272.17        |         |         |        |
| R  |               |               |         |         |        | 175.12        |         |         |        |



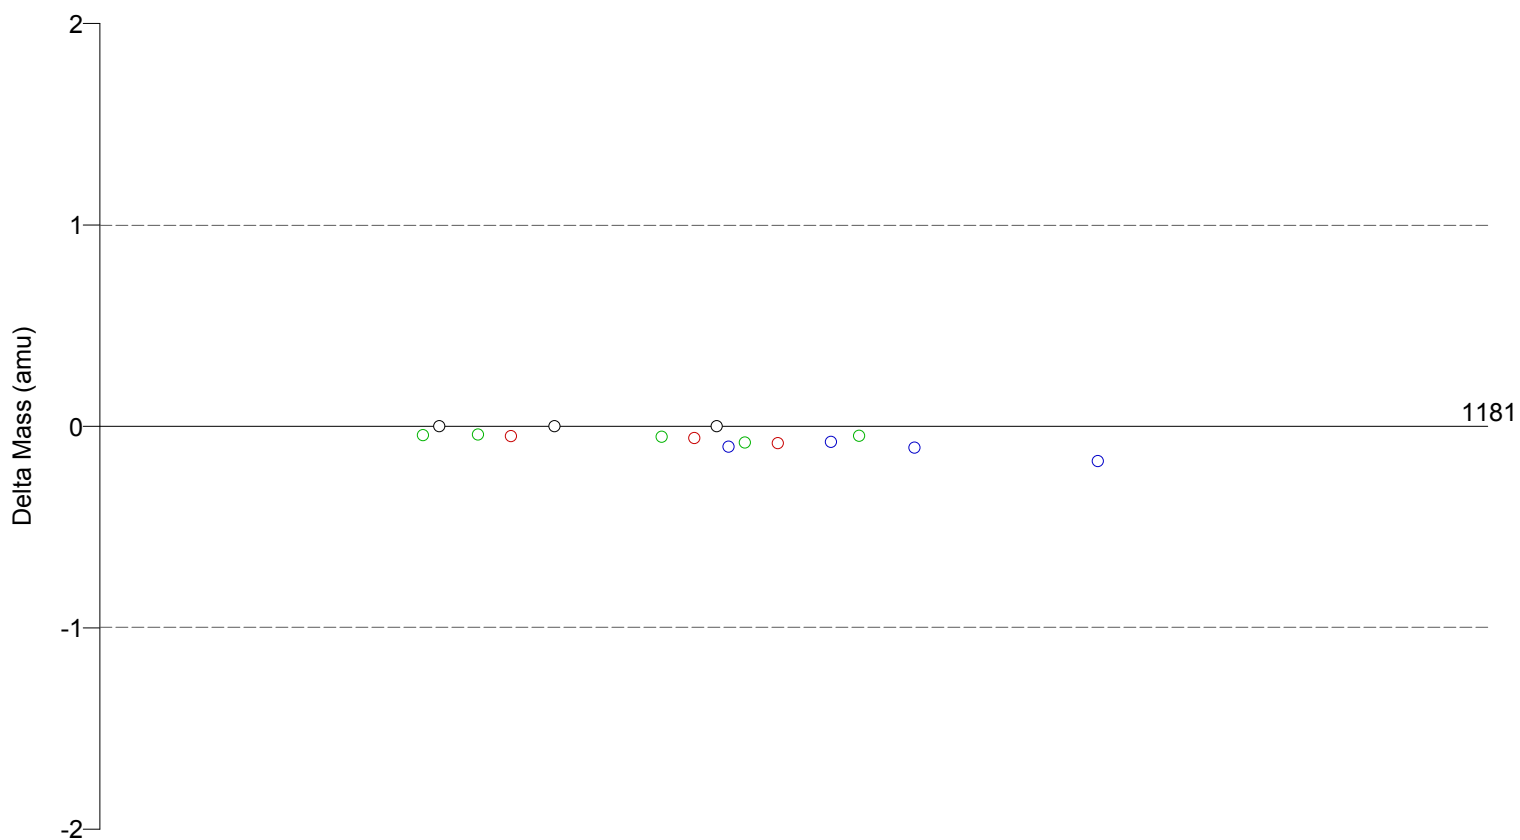

#19287468-1 NL: 2.47E6



---

| Reference                          |                 |         |   | P   | Score | Coverage | Accession |     |       |       |
|------------------------------------|-----------------|---------|---|-----|-------|----------|-----------|-----|-------|-------|
| Scan(s)                            | Sequence        | MH+     | z | P   | XC    | DeltaCn  | Sp        | RSp | Ions  | Count |
| IPI:IPI00922473.1 TREMBL:B7Z8H4 Ta |                 |         |   | 1   | 8.1   | 0.0      | 0         |     |       |       |
| 19287468 - 1                       | K.EYGRAPVFGPR.R | 1198.63 | 2 | 0.8 | 2.135 | 0.461    | 245.0     | 3   | 11/30 | 3     |

---

1 of 1 peptide matches reported, 0 removed due to filtering

DTA for scans: 19287468-1  
Precursor ion: 599.82  
Mass type: mono  
Mod's: (M\* +15.99492) C=161.01468

Ion series for charge: +1

| AA | A ions        | B ions        | B* ions | Bo ions | C ions | Y ions        | Y* ions | Yo ions | Z ions |
|----|---------------|---------------|---------|---------|--------|---------------|---------|---------|--------|
| E  | 102.05        | 130.05        |         |         |        |               |         |         |        |
| Y  | 265.12        | 293.11        |         |         |        | 1069.59       |         |         |        |
| G  | <b>322.14</b> | <b>350.13</b> |         |         |        | 906.53        |         |         |        |
| R  | <b>478.24</b> | <b>506.24</b> |         |         |        | <b>849.51</b> |         |         |        |
| A  | <b>549.28</b> | <b>577.27</b> |         |         |        | <b>693.40</b> |         |         |        |
| P  | <b>646.33</b> | 674.33        |         |         |        | <b>622.37</b> |         |         |        |
| V  | 745.40        | 773.39        |         |         |        | 525.31        |         |         |        |
| P  | 842.45        | 870.45        |         |         |        | 426.25        |         |         |        |
| G  | 899.47        | 927.47        |         |         |        | 329.19        |         |         |        |
| P  | 996.53        | 1024.52       |         |         |        | 272.17        |         |         |        |
| R  |               |               |         |         |        | 175.12        |         |         |        |

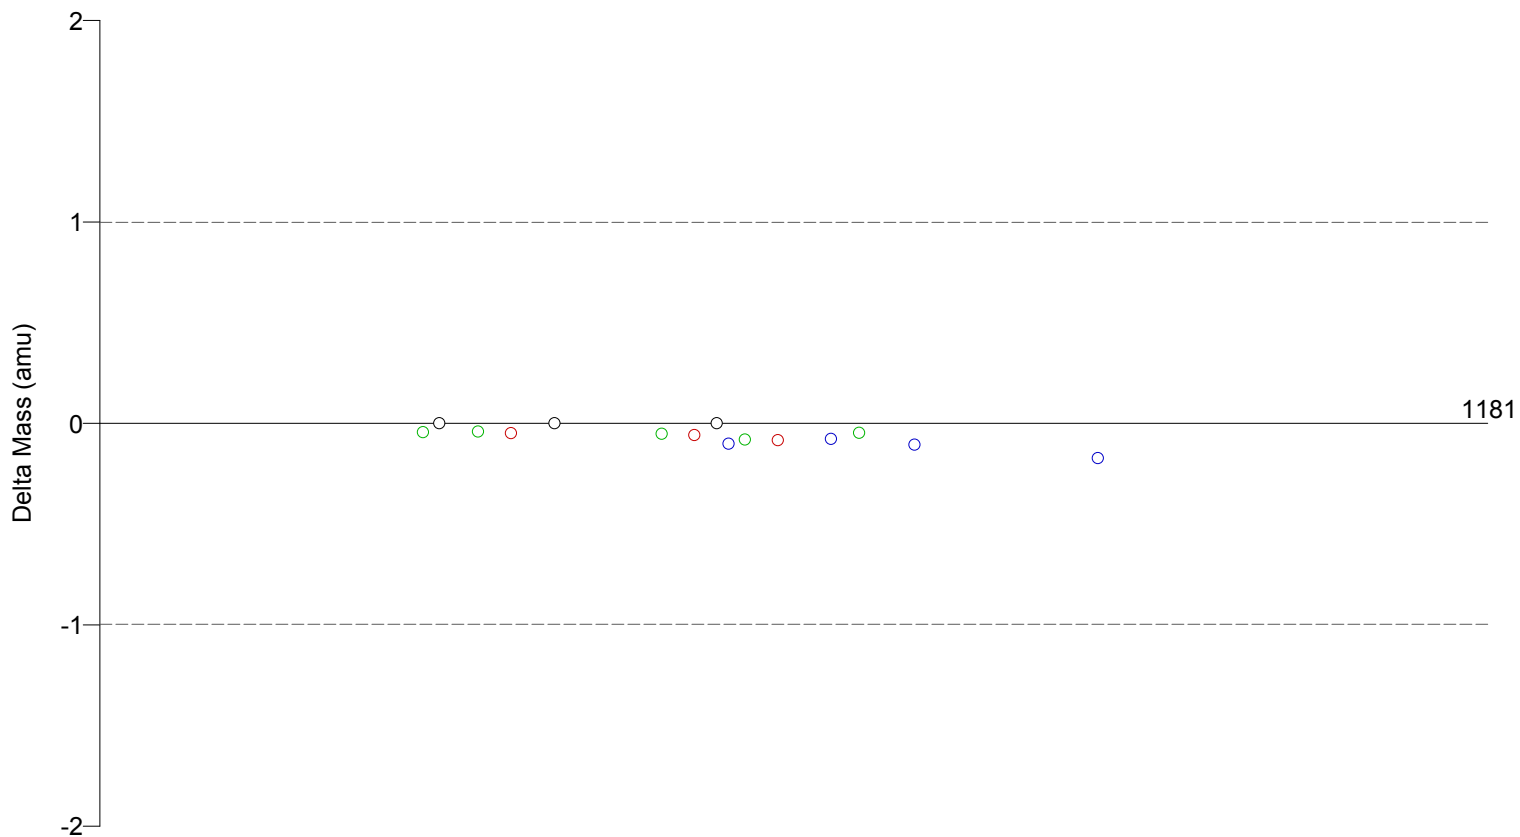

#19287468-1 NL: 2.47E6



---

| Reference                                                      |                    |         |   | P | Score | Coverage | Accession |     |      |       |
|----------------------------------------------------------------|--------------------|---------|---|---|-------|----------|-----------|-----|------|-------|
| Scan(s)                                                        | Sequence           | MH+     | z | P | XC    | DeltaCn  | Sp        | RSp | Ions | Count |
| IPI:IPI00023129.1 SWISS-PROT:O95813 TREMBL:Q3SY34 ENSEMBL:ENSP |                    |         |   | 1 | 8.1   | 0.0      |           | 0   |      |       |
| 19287468 - 1                                                   | R.FWKKPEREM*HPSR.D | 1743.87 | 2 | 1 | 2.081 | 0.445    | 89.0      | 4   | 8/36 |       |

---

1 of 1 peptide matches reported, 0 removed due to filtering

DTA for scans: 19287468-1  
Precursor ion: 872.44  
Mass type: mono  
Mod's: (M\* +15.99492) C=161.01468

Ion series for charge: +1

| AA | A ions        | B ions         | B* ions | Bo ions | C ions | Y ions         | Y* ions | Yo ions | Z ions |
|----|---------------|----------------|---------|---------|--------|----------------|---------|---------|--------|
| F  | 120.08        | 148.08         |         |         |        |                |         |         |        |
| W  | <b>306.16</b> | <b>334.16</b>  |         |         |        | 1596.81        |         |         |        |
| K  | 434.26        | <b>462.25</b>  |         |         |        | 1410.73        |         |         |        |
| K  | 562.35        | <b>590.34</b>  |         |         |        | 1282.63        |         |         |        |
| P  | 659.40        | <b>687.40</b>  |         |         |        | 1154.54        |         |         |        |
| E  | <b>788.45</b> | 816.44         |         |         |        | <b>1057.48</b> |         |         |        |
| R  | 944.55        | 972.54         |         |         |        | 928.44         |         |         |        |
| E  | 1073.59       | <b>1101.58</b> |         |         |        | 772.34         |         |         |        |
| M* | 1220.62       | 1248.62        |         |         |        | <b>643.30</b>  |         |         |        |
| H  | 1357.68       | 1385.68        |         |         |        | <b>496.26</b>  |         |         |        |
| P  | 1454.74       | 1482.73        |         |         |        | 359.20         |         |         |        |
| S  | 1541.77       | 1569.76        |         |         |        | 262.15         |         |         |        |
| R  |               |                |         |         |        | 175.12         |         |         |        |

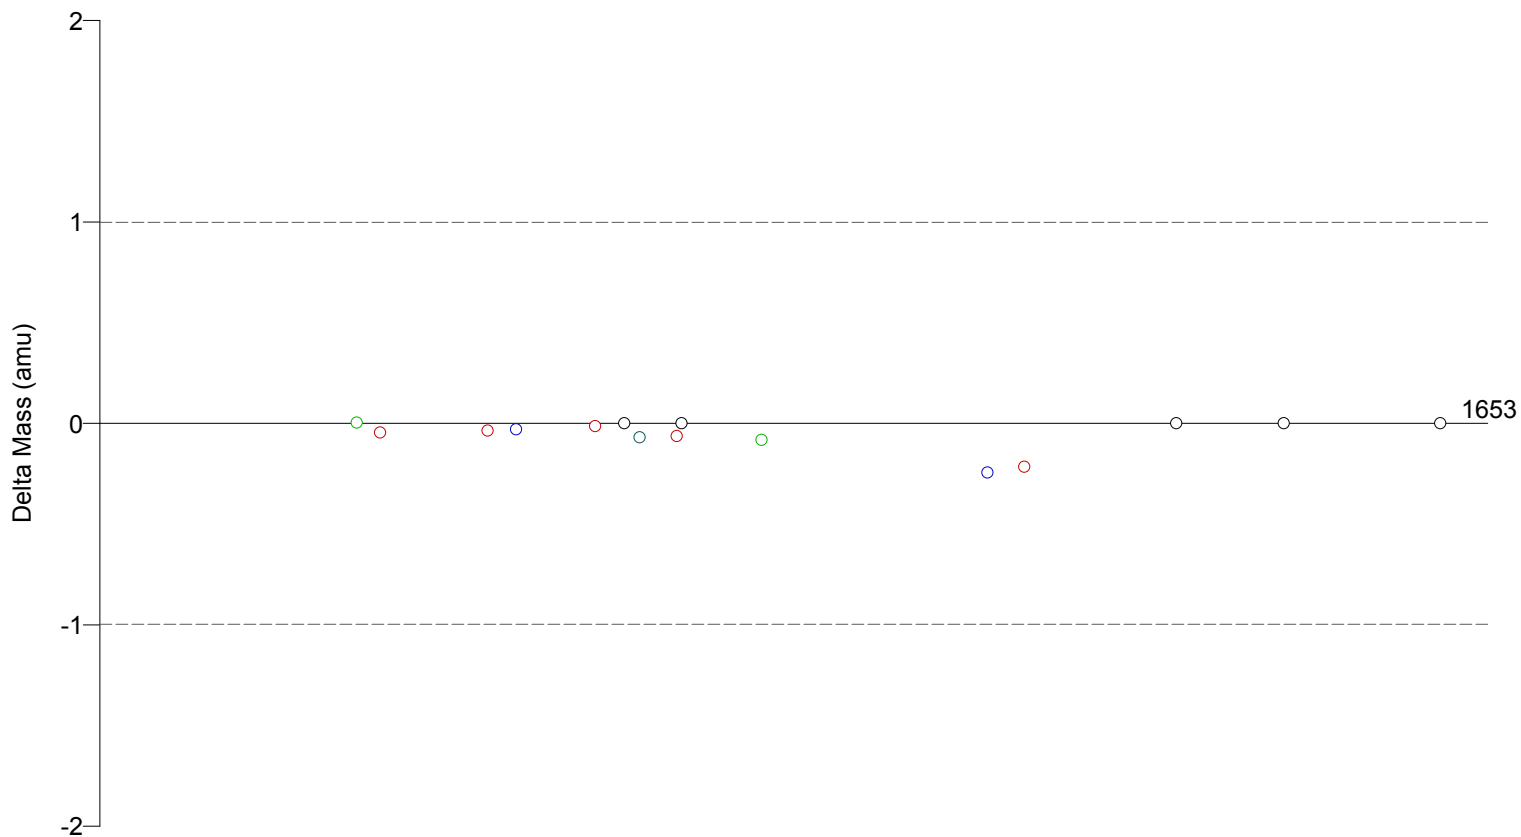

#19287468-1 NL: 1.22E5

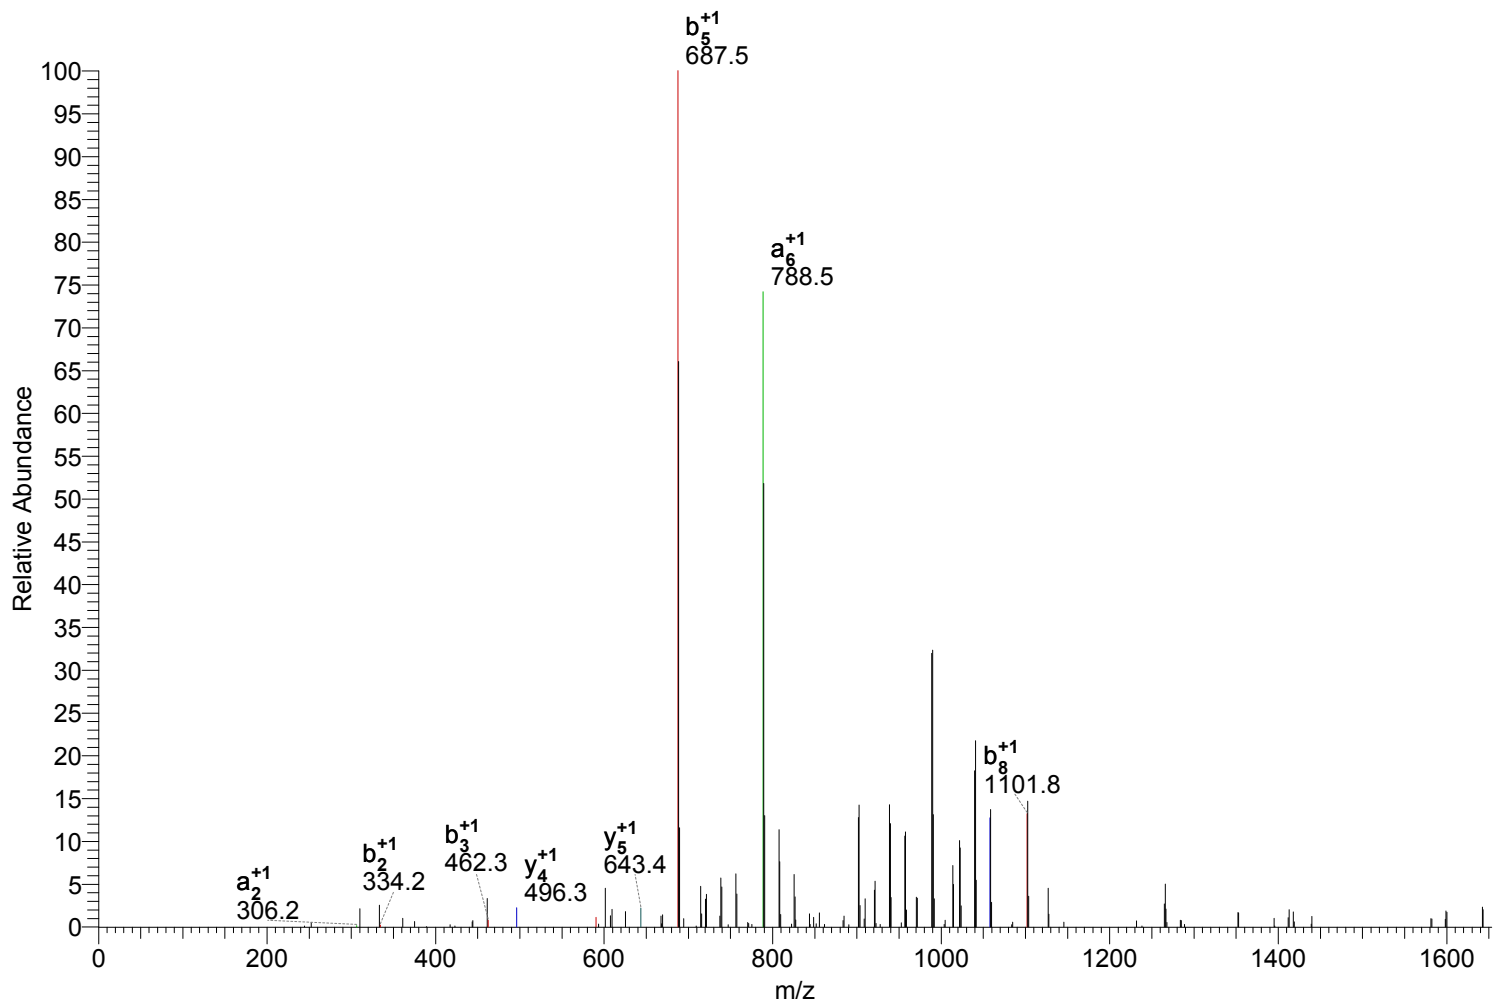

---

| Reference                                                    |          |         |   | P | Score | Coverage | Accession |     |      |       |
|--------------------------------------------------------------|----------|---------|---|---|-------|----------|-----------|-----|------|-------|
| Scan(s)                                                      | Sequence | MH+     | z | P | XC    | DeltaCn  | Sp        | RSp | Ions | Count |
| IPI:IPI00009771.6 H-INV:HIT000278695 VEGA:OTTHUMP00000077225 | T        |         | 1 |   | 8.1   | 0.0      | 0         |     |      |       |
| 2118291816 - K.LRAELDEVNK.S                                  |          | 1186.64 | 2 | 1 | 1.923 | 0.445    | 146.4     | 3   | 9/27 | 1     |

---

1 of 1 peptide matches reported, 0 removed due to filtering



DTA for scans: 2118291816-26226248  
Precursor ion: 593.83  
Mass type: mono  
Mod's: (M\* +15.99492) C=161.01468

Ion series for charge: +1

| AA | A ions        | B ions         | B* ions | Bo ions | C ions | Y ions        | Y* ions | Yo ions | Z ions |
|----|---------------|----------------|---------|---------|--------|---------------|---------|---------|--------|
| L  | 86.10         | 114.09         |         |         |        |               |         |         |        |
| R  | <b>242.20</b> | 270.19         |         |         |        | 1073.56       |         |         |        |
| A  | <b>313.23</b> | <b>341.23</b>  |         |         |        | 917.46        |         |         |        |
| E  | <b>442.28</b> | <b>470.27</b>  |         |         |        | <b>846.42</b> |         |         |        |
| L  | 555.36        | 583.36         |         |         |        | 717.38        |         |         |        |
| D  | 670.39        | <b>698.38</b>  |         |         |        | 604.29        |         |         |        |
| E  | 799.43        | 827.43         |         |         |        | <b>489.27</b> |         |         |        |
| V  | 898.50        | 926.49         |         |         |        | 360.22        |         |         |        |
| N  | 1012.54       | <b>1040.54</b> |         |         |        | 261.16        |         |         |        |
| K  |               |                |         |         |        | 147.11        |         |         |        |

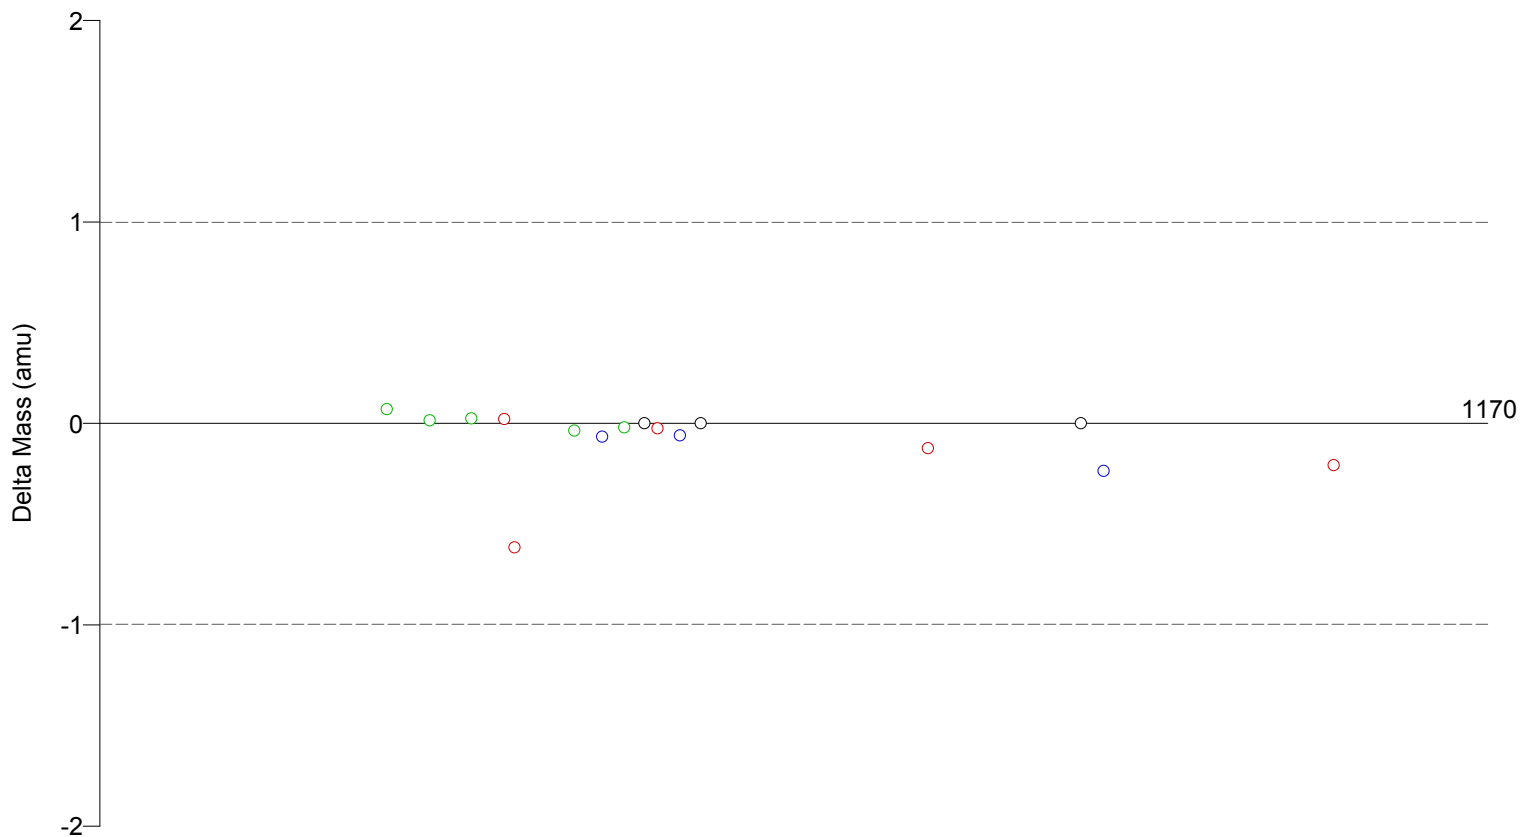

#2118291816-26226248 NL: 6.95E6

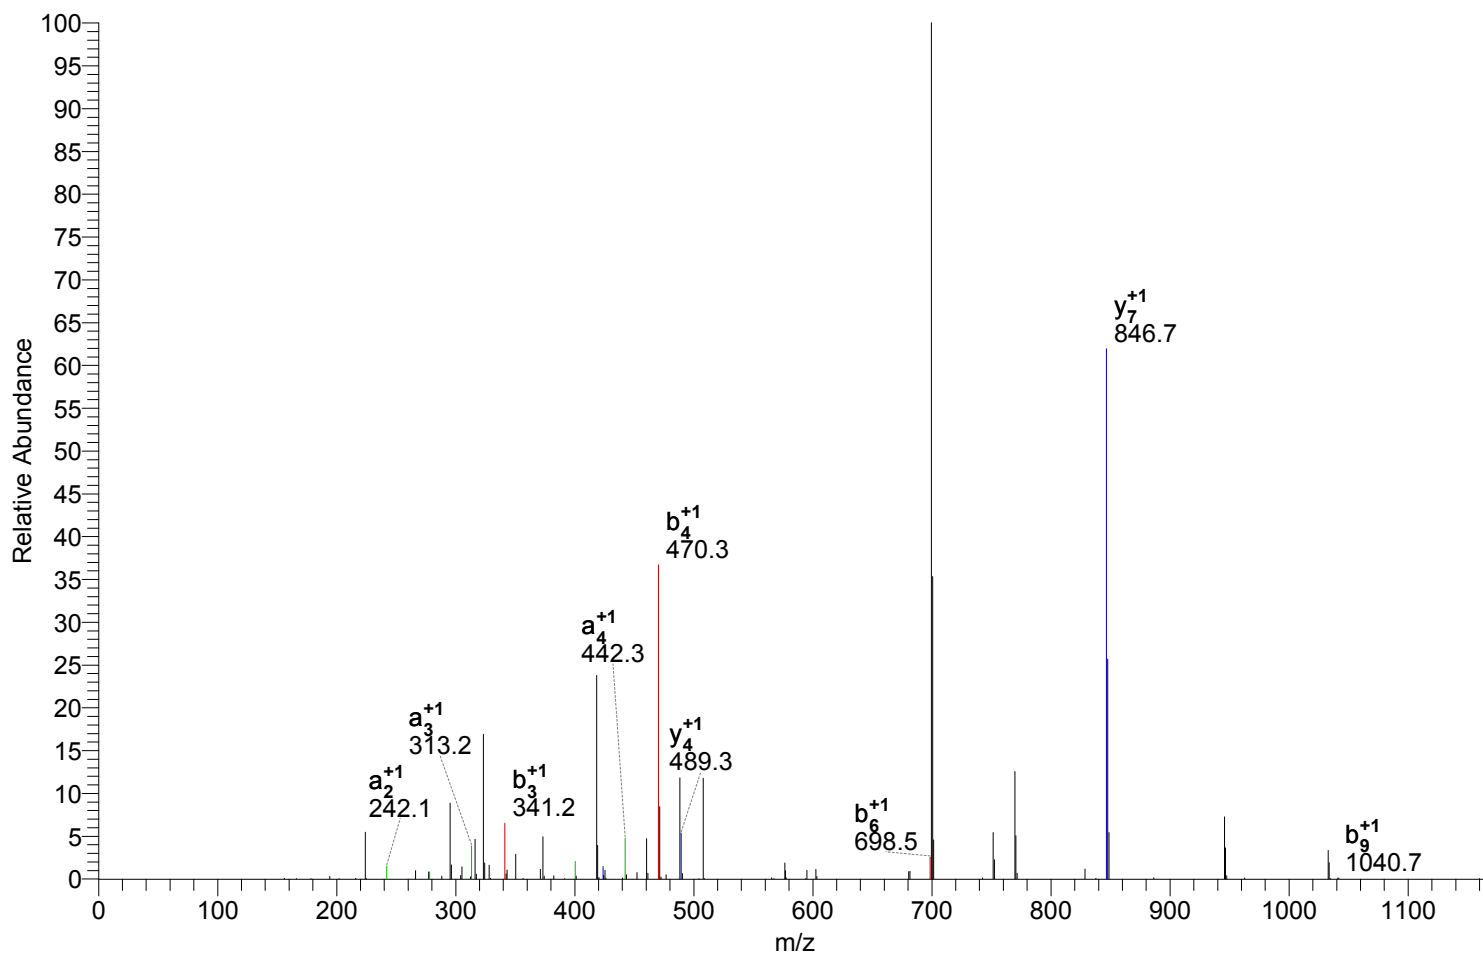

---

| Reference                          |          |         |   | P | Score | Coverage | Accession |     |      |       |
|------------------------------------|----------|---------|---|---|-------|----------|-----------|-----|------|-------|
| Scan(s)                            | Sequence | MH+     | z | P | XC    | DeltaCn  | Sp        | RSp | Ions | Count |
| IPI:IPI00879819.1 SWISS-PROT:Q0325 |          |         |   | 1 | 8.1   | 0.0      | 0         |     |      |       |
| 2118291816 - K.LRAELDEVNK.S        |          | 1186.64 | 2 | 1 | 1.923 | 0.445    | 146.4     | 3   | 9/27 | 1     |

---

1 of 1 peptide matches reported, 0 removed due to filtering

DTA for scans: 2118291816-26226248  
Precursor ion: 593.83  
Mass type: mono  
Mod's: (M\* +15.99492) C=161.01468

Ion series for charge: +1

| AA | A ions        | B ions         | B* ions | Bo ions | C ions | Y ions        | Y* ions | Yo ions | Z ions |
|----|---------------|----------------|---------|---------|--------|---------------|---------|---------|--------|
| L  | 86.10         | 114.09         |         |         |        |               |         |         |        |
| R  | <b>242.20</b> | 270.19         |         |         |        | 1073.56       |         |         |        |
| A  | <b>313.23</b> | <b>341.23</b>  |         |         |        | 917.46        |         |         |        |
| E  | <b>442.28</b> | <b>470.27</b>  |         |         |        | <b>846.42</b> |         |         |        |
| L  | 555.36        | 583.36         |         |         |        | 717.38        |         |         |        |
| D  | 670.39        | <b>698.38</b>  |         |         |        | 604.29        |         |         |        |
| E  | 799.43        | 827.43         |         |         |        | <b>489.27</b> |         |         |        |
| V  | 898.50        | 926.49         |         |         |        | 360.22        |         |         |        |
| N  | 1012.54       | <b>1040.54</b> |         |         |        | 261.16        |         |         |        |
| K  |               |                |         |         |        | 147.11        |         |         |        |



#2118291816-26226248 NL: 6.95E6



---

| Reference                                                      |          |         |   | P | Score | Coverage | Accession |     |      |       |
|----------------------------------------------------------------|----------|---------|---|---|-------|----------|-----------|-----|------|-------|
| Scan(s)                                                        | Sequence | MH+     | z | P | XC    | DeltaCn  | Sp        | RSp | Ions | Count |
| IPI:IPI00032087.4 SWISS-PROT:Q9Y2E4 TREMBL:Q86XV3 ENSEMBL:ENSP |          |         |   | 1 | 8.1   | 0.0      | 0         |     |      |       |
| 2118291816 - K.LLWFVTESK.H                                     |          | 1122.62 | 2 | 1 | 1.798 | 0.549    | 133.1     | 18  | 8/24 | 1     |

1 of 1 peptide matches reported, 0 removed due to filtering

DTA for scans: 2118291816-26226248  
Precursor ion: 561.82  
Mass type: mono  
Mod's: (M\* +15.99492) C=161.01468

Ion series for charge: +1

| AA | A ions        | B ions        | B* ions | Bo ions | C ions | Y ions         | Y* ions | Yo ions | Z ions |
|----|---------------|---------------|---------|---------|--------|----------------|---------|---------|--------|
| L  | 86.10         | 114.09        |         |         |        |                |         |         |        |
| L  | <b>199.18</b> | <b>227.18</b> |         |         |        | <b>1009.54</b> |         |         |        |
| W  | 385.26        | 413.25        |         |         |        | <b>896.45</b>  |         |         |        |
| F  | 532.33        | 560.32        |         |         |        | 710.37         |         |         |        |
| V  | 631.40        | 659.39        |         |         |        | 563.30         |         |         |        |
| T  | 732.44        | <b>760.44</b> |         |         |        | 464.24         |         |         |        |
| E  | 861.49        | 889.48        |         |         |        | <b>363.19</b>  |         |         |        |
| S  | <b>948.52</b> | 976.51        |         |         |        | 234.14         |         |         |        |
| K  |               |               |         |         |        | 147.11         |         |         |        |

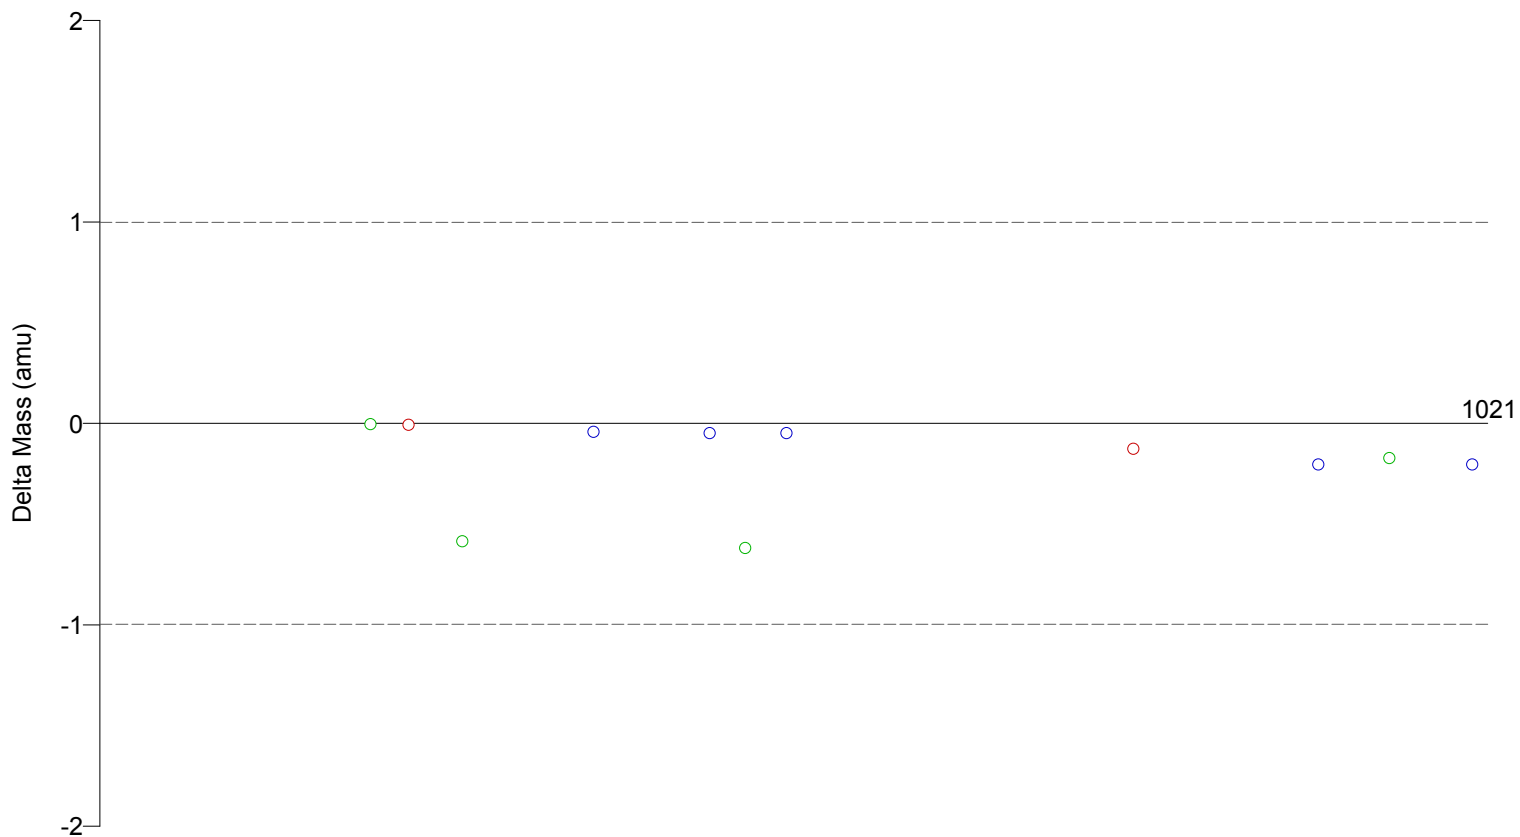

#2118291816-26226248 NL: 1.43E5

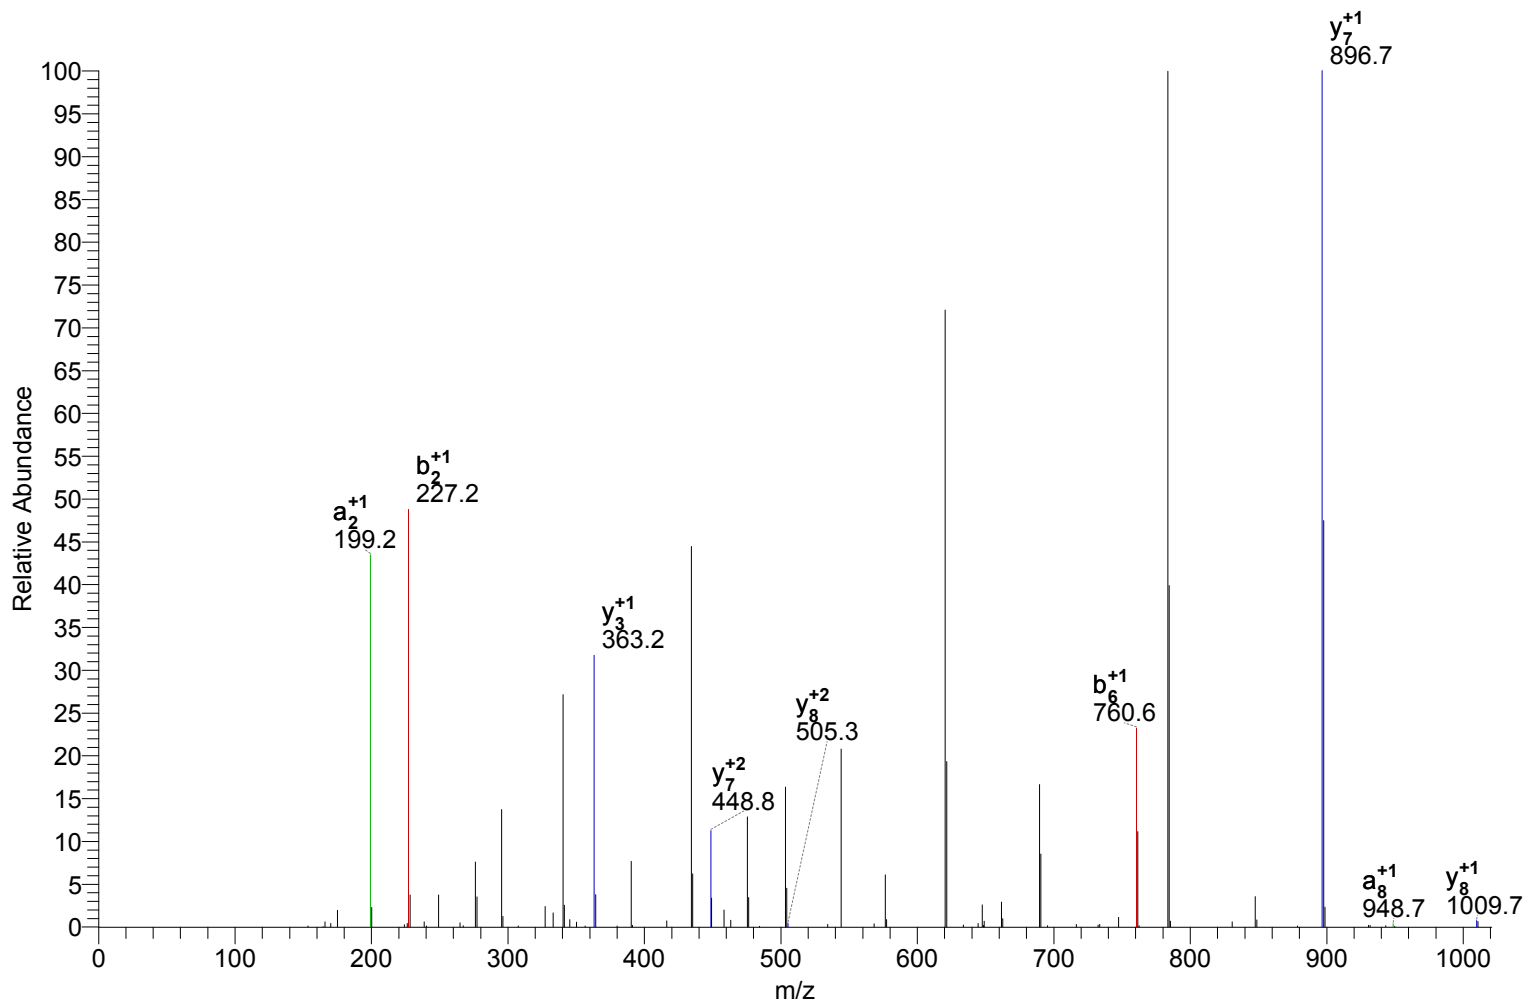



---

| Reference                          |          |         |   | P | Score | Coverage | Accession |     |      |       |
|------------------------------------|----------|---------|---|---|-------|----------|-----------|-----|------|-------|
| Scan(s)                            | Sequence | MH+     | z | P | XC    | DeltaCn  | Sp        | RSp | Ions | Count |
| IPI:IPI00643330.5 TREMBL:B3KWX2;Q5 |          |         |   | 1 | 8.1   | 0.0      | 0         |     |      |       |
| 2118291816 - K.LLWFVTESK.H         |          | 1122.62 | 2 | 1 | 1.798 | 0.549    | 133.1     | 18  | 8/24 | 1     |

---

1 of 1 peptide matches reported, 0 removed due to filtering

DTA for scans: 2118291816-26226248  
Precursor ion: 561.82  
Mass type: mono  
Mod's: (M\* +15.99492) C=161.01468

Ion series for charge: +1

| AA | A ions        | B ions        | B* ions | Bo ions | C ions | Y ions         | Y* ions | Yo ions | Z ions |
|----|---------------|---------------|---------|---------|--------|----------------|---------|---------|--------|
| L  | 86.10         | 114.09        |         |         |        |                |         |         |        |
| L  | <b>199.18</b> | <b>227.18</b> |         |         |        | <b>1009.54</b> |         |         |        |
| W  | 385.26        | 413.25        |         |         |        | <b>896.45</b>  |         |         |        |
| F  | 532.33        | 560.32        |         |         |        | 710.37         |         |         |        |
| V  | 631.40        | 659.39        |         |         |        | 563.30         |         |         |        |
| T  | 732.44        | <b>760.44</b> |         |         |        | 464.24         |         |         |        |
| E  | 861.49        | 889.48        |         |         |        | <b>363.19</b>  |         |         |        |
| S  | <b>948.52</b> | 976.51        |         |         |        | 234.14         |         |         |        |
| K  |               |               |         |         |        | 147.11         |         |         |        |



#2118291816-26226248 NL: 1.43E5



---

| Reference         |                                              |        |   | P | Score | Coverage | Accession |     |      |       |
|-------------------|----------------------------------------------|--------|---|---|-------|----------|-----------|-----|------|-------|
| Scan(s)           | Sequence                                     | MH+    | z | P | XC    | DeltaCn  | Sp        | RSp | Ions | Count |
| IPI:IPI00018279.7 | SWISS-PROT:P25940 TREMBL:Q59GD4 ENSEMBL:ENSP |        |   | 1 | 8.1   | 0.0      | 0         |     |      |       |
|                   | R.RPPGTAER.P                                 | 883.47 | 2 | 1 | 1.794 | 0.387    | 146.8     | 6   | 7/21 |       |

---

1 of 1 peptide matches reported, 0 removed due to filtering

DTA for scan: 0  
Precursor ion: 442.24  
Mass type: mono  
Mod's: (M\* +15.99492) C=161.01468

Ion series for charge: +1

| AA | A ions | B ions        | B* ions | Bo ions | C ions | Y ions        | Y* ions | Yo ions | Z ions |
|----|--------|---------------|---------|---------|--------|---------------|---------|---------|--------|
| R  | 129.11 | <b>157.11</b> |         |         |        |               |         |         |        |
| P  | 226.17 | <b>254.16</b> |         |         |        | <b>727.37</b> |         |         |        |
| P  | 323.22 | 351.21        |         |         |        | <b>630.32</b> |         |         |        |
| G  | 380.24 | <b>408.24</b> |         |         |        | 533.27        |         |         |        |
| T  | 481.29 | 509.28        |         |         |        | 476.25        |         |         |        |
| A  | 552.33 | 580.32        |         |         |        | 375.20        |         |         |        |
| E  | 681.37 | <b>709.36</b> |         |         |        | 304.16        |         |         |        |
| R  |        |               |         |         |        | <b>175.12</b> |         |         |        |

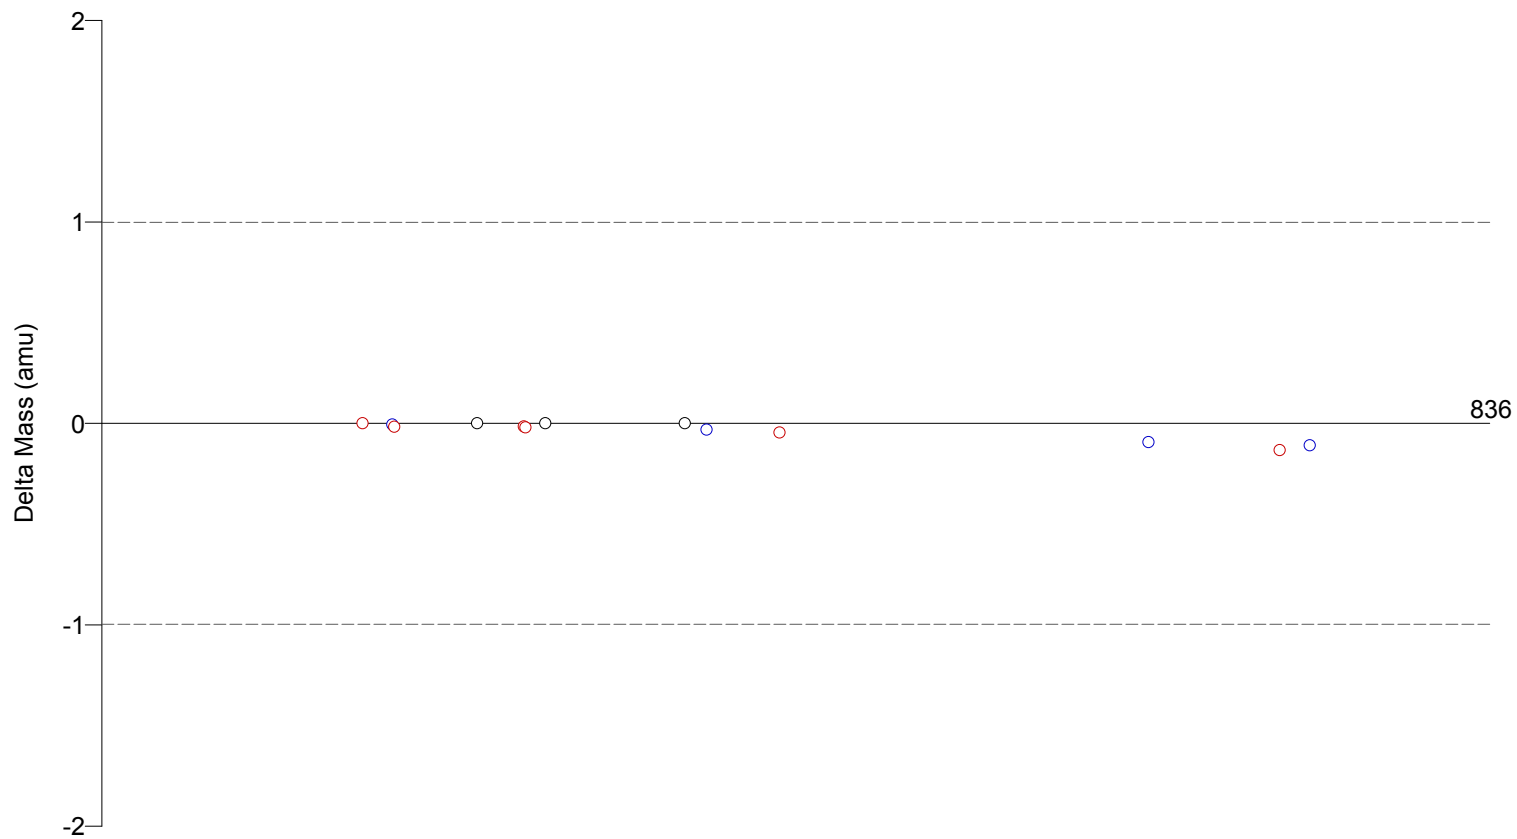

#0-0 NL: 6.35E5

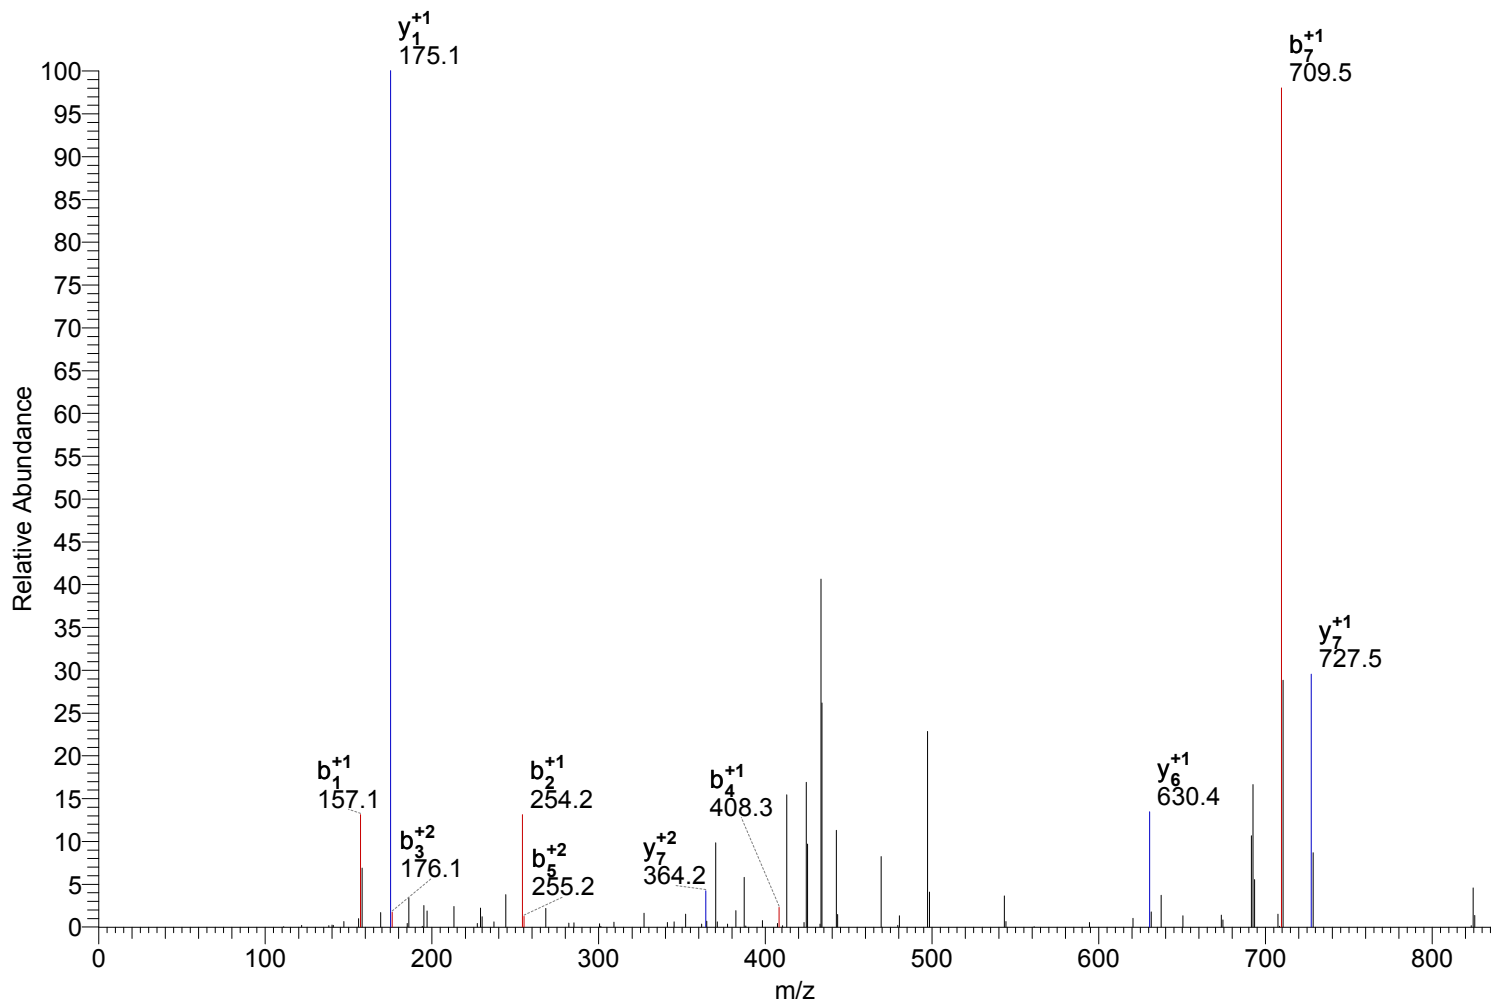

---

| Reference                                                      |                |         |   | P | Score | Coverage | Accession |     |      |       |
|----------------------------------------------------------------|----------------|---------|---|---|-------|----------|-----------|-----|------|-------|
| Scan(s)                                                        | Sequence       | MH+     | z | P | XC    | DeltaCn  | Sp        | RSp | Ions | Count |
| IPI:IPI00021304.1 SWISS-PROT:P35908 ENSEMBL:ENSP00000310861 RE |                |         |   | 1 | 8.1   | 0.0      | 0         |     |      |       |
| 19287468 - 1                                                   | K.KDVDNAYMIK.V | 1196.60 | 2 | 1 | 1.761 | 0.589    | 130.6     | 4   | 8/27 | 2     |

---

1 of 1 peptide matches reported, 0 removed due to filtering

DTA for scans: 19287468-1  
Precursor ion: 598.80  
Mass type: mono  
Mod's: (M\* +15.99492) C=161.01468

Ion series for charge: +1

| AA | A ions        | B ions         | B* ions | Bo ions | C ions | Y ions        | Y* ions | Yo ions | Z ions |
|----|---------------|----------------|---------|---------|--------|---------------|---------|---------|--------|
| K  | 101.11        | 129.10         |         |         |        |               |         |         |        |
| D  | <b>216.13</b> | <b>244.13</b>  |         |         |        | 1068.50       |         |         |        |
| V  | 315.20        | <b>343.20</b>  |         |         |        | <b>953.48</b> |         |         |        |
| D  | 430.23        | 458.22         |         |         |        | <b>854.41</b> |         |         |        |
| N  | 544.27        | 572.27         |         |         |        | 739.38        |         |         |        |
| A  | 615.31        | 643.30         |         |         |        | 625.34        |         |         |        |
| Y  | 778.37        | 806.37         |         |         |        | <b>554.30</b> |         |         |        |
| M  | 909.41        | 937.41         |         |         |        | 391.24        |         |         |        |
| I  | 1022.50       | <b>1050.49</b> |         |         |        | <b>260.20</b> |         |         |        |
| K  |               |                |         |         |        | 147.11        |         |         |        |



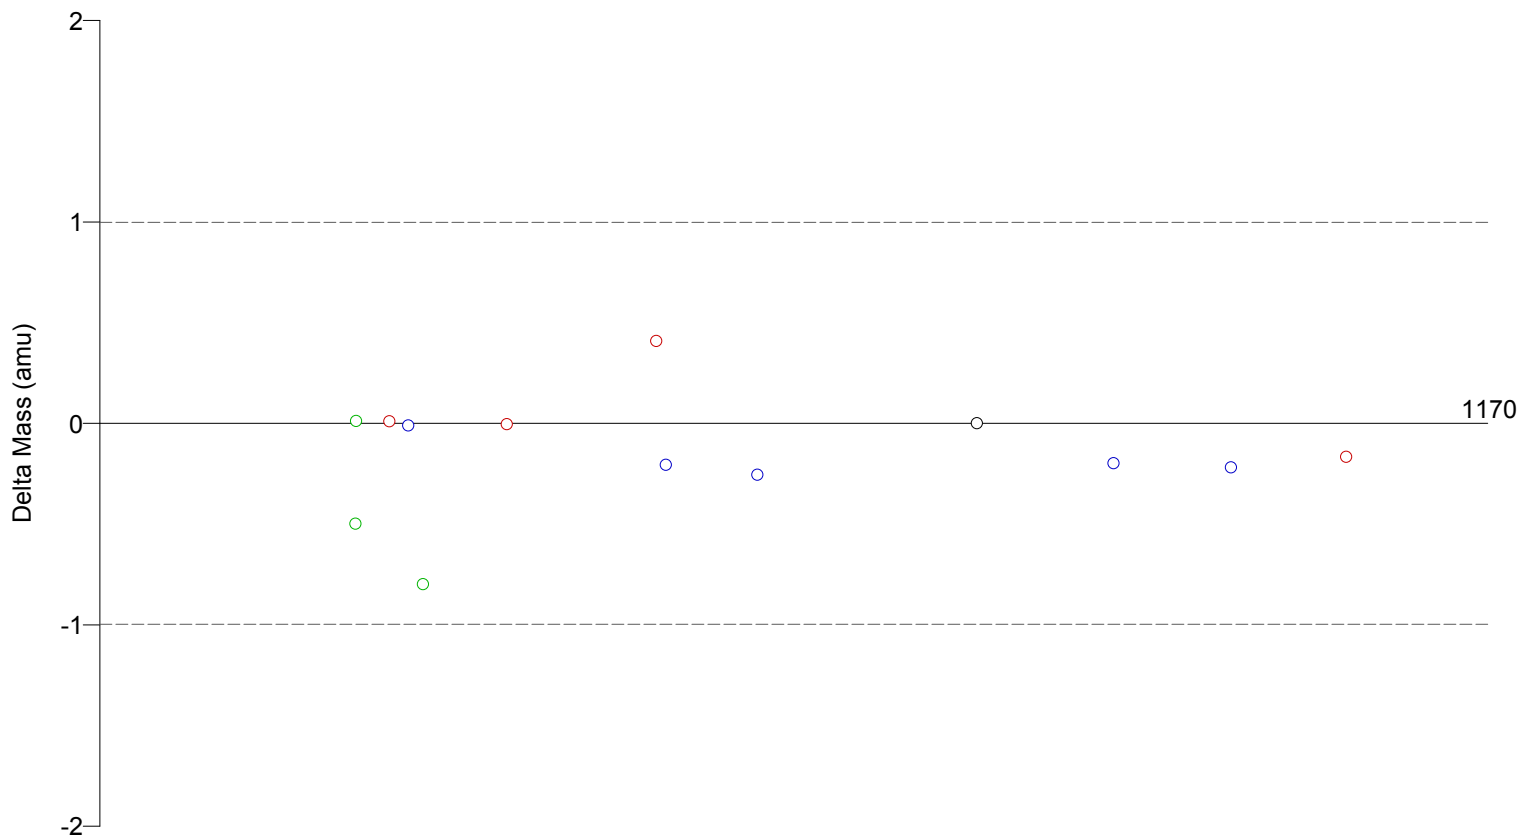

#19287468-1 NL: 9.45E4

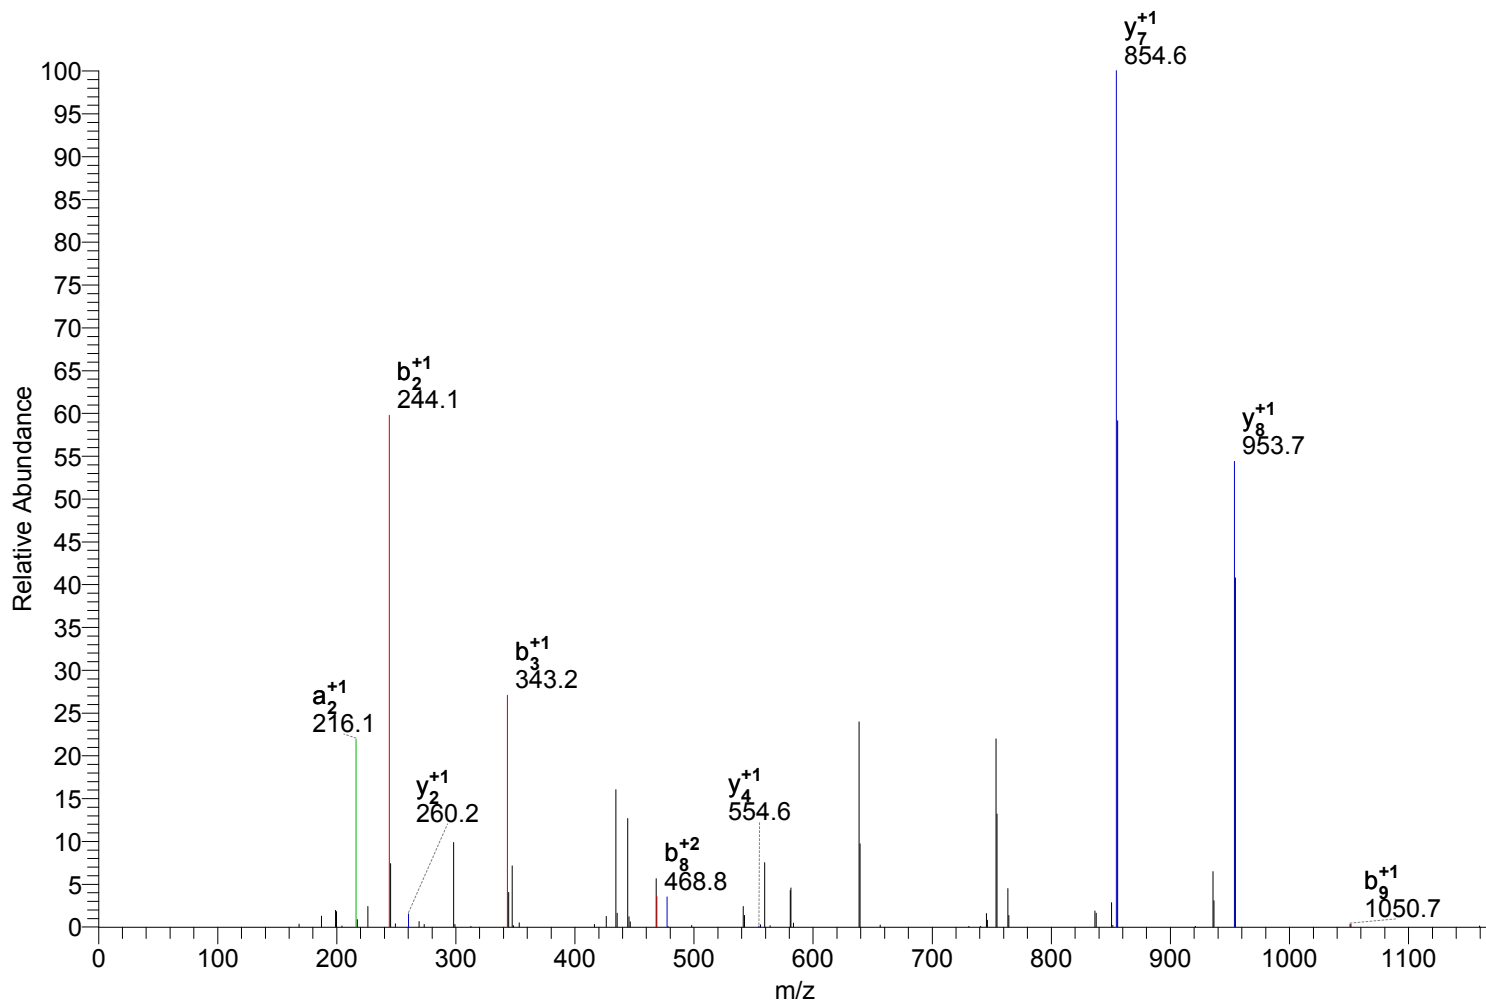

---

| Reference                          |                |         |   | P | Score | Coverage | Accession |        |      |       |
|------------------------------------|----------------|---------|---|---|-------|----------|-----------|--------|------|-------|
| Scan(s)                            | Sequence       | MH+     | z | P | XC    | DeltaCn  | Sp        | RSp    | Ions | Count |
| gi 254622 bbs 112352 (S43646) cyto |                |         |   | 1 | 8.1   | 0.0      |           | 254622 |      |       |
| 19287468 - 1                       | K.KDVDNAYMIK.V | 1196.60 | 2 | 1 | 1.761 | 0.589    | 130.6     | 4      | 8/27 | 2     |

1 of 1 peptide matches reported, 0 removed due to filtering

DTA for scans: 19287468-1  
Precursor ion: 598.80  
Mass type: mono  
Mod's: (M\* +15.99492) C=161.01468

Ion series for charge: +1

| AA | A ions        | B ions         | B* ions | Bo ions | C ions | Y ions        | Y* ions | Yo ions | Z ions |
|----|---------------|----------------|---------|---------|--------|---------------|---------|---------|--------|
| K  | 101.11        | 129.10         |         |         |        |               |         |         |        |
| D  | <b>216.13</b> | <b>244.13</b>  |         |         |        | 1068.50       |         |         |        |
| V  | 315.20        | <b>343.20</b>  |         |         |        | <b>953.48</b> |         |         |        |
| D  | 430.23        | 458.22         |         |         |        | <b>854.41</b> |         |         |        |
| N  | 544.27        | 572.27         |         |         |        | 739.38        |         |         |        |
| A  | 615.31        | 643.30         |         |         |        | 625.34        |         |         |        |
| Y  | 778.37        | 806.37         |         |         |        | <b>554.30</b> |         |         |        |
| M  | 909.41        | 937.41         |         |         |        | 391.24        |         |         |        |
| I  | 1022.50       | <b>1050.49</b> |         |         |        | <b>260.20</b> |         |         |        |
| K  |               |                |         |         |        | 147.11        |         |         |        |

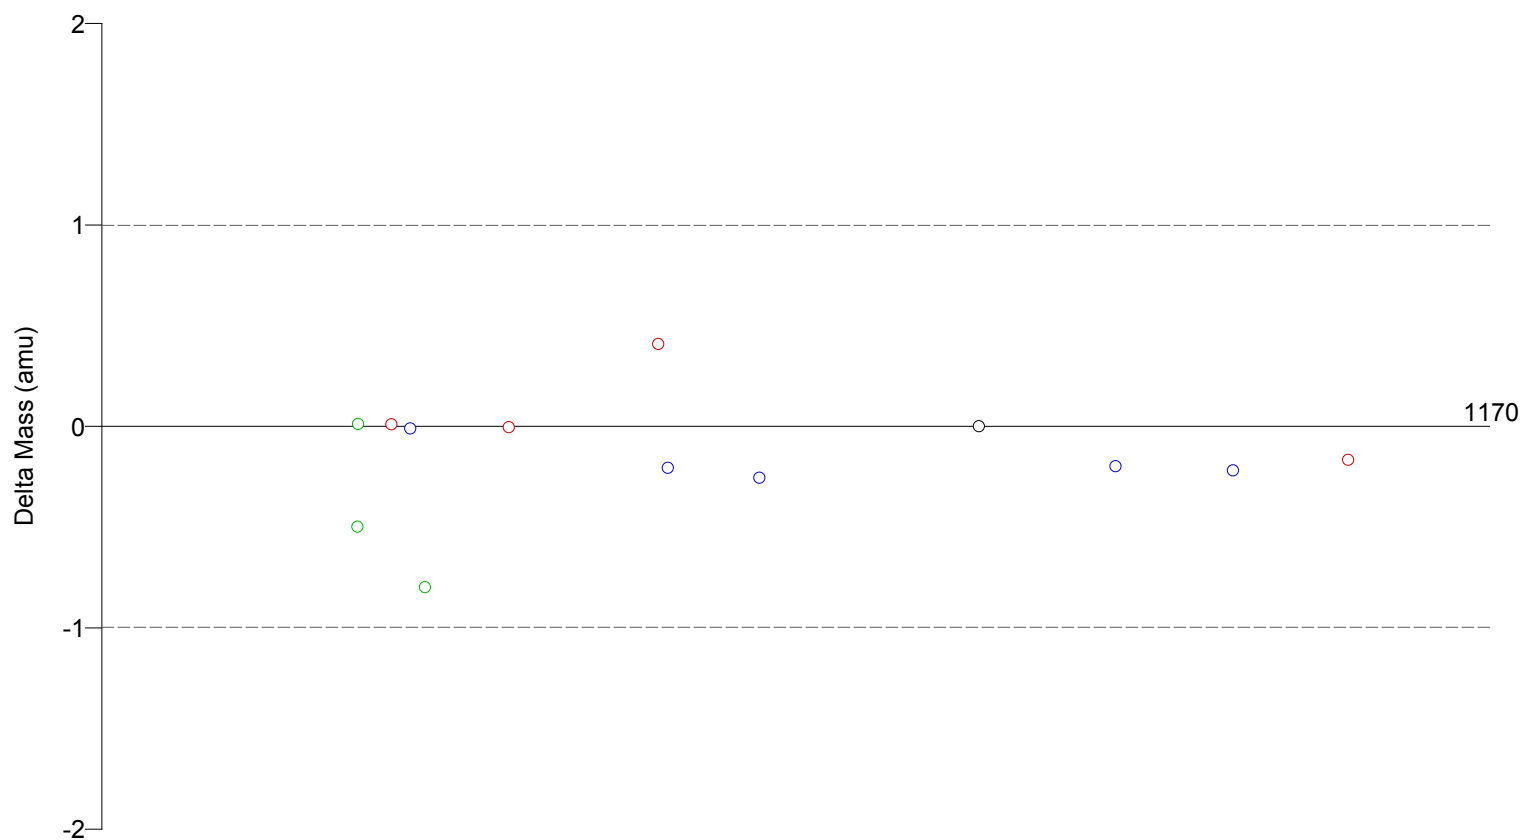

#19287468-1 NL: 9.45E4



---

| Reference                      |                |         |   | P | Score | Coverage | Accession |        |      |       |
|--------------------------------|----------------|---------|---|---|-------|----------|-----------|--------|------|-------|
| Scan(s)                        | Sequence       | MH+     | z | P | XC    | DeltaCn  | Sp        | RSp    | Ions | Count |
| gi 547754 sp P35908 K22E_HUMAN | KER            |         |   | 1 | 8.1   | 0.0      |           | 547754 |      |       |
| 19287468 - 1                   | K.KDVDNAYMIK.V | 1196.60 | 2 | 1 | 1.761 | 0.589    | 130.6     | 4      | 8/27 | 2     |

1 of 1 peptide matches reported, 0 removed due to filtering

DTA for scans: 19287468-1  
Precursor ion: 598.80  
Mass type: mono  
Mod's: (M\* +15.99492) C=161.01468

Ion series for charge: +1

| AA | A ions        | B ions         | B* ions | Bo ions | C ions | Y ions        | Y* ions | Yo ions | Z ions |
|----|---------------|----------------|---------|---------|--------|---------------|---------|---------|--------|
| K  | 101.11        | 129.10         |         |         |        |               |         |         |        |
| D  | <b>216.13</b> | <b>244.13</b>  |         |         |        | 1068.50       |         |         |        |
| V  | 315.20        | <b>343.20</b>  |         |         |        | <b>953.48</b> |         |         |        |
| D  | 430.23        | 458.22         |         |         |        | <b>854.41</b> |         |         |        |
| N  | 544.27        | 572.27         |         |         |        | 739.38        |         |         |        |
| A  | 615.31        | 643.30         |         |         |        | 625.34        |         |         |        |
| Y  | 778.37        | 806.37         |         |         |        | <b>554.30</b> |         |         |        |
| M  | 909.41        | 937.41         |         |         |        | 391.24        |         |         |        |
| I  | 1022.50       | <b>1050.49</b> |         |         |        | <b>260.20</b> |         |         |        |
| K  |               |                |         |         |        | 147.11        |         |         |        |

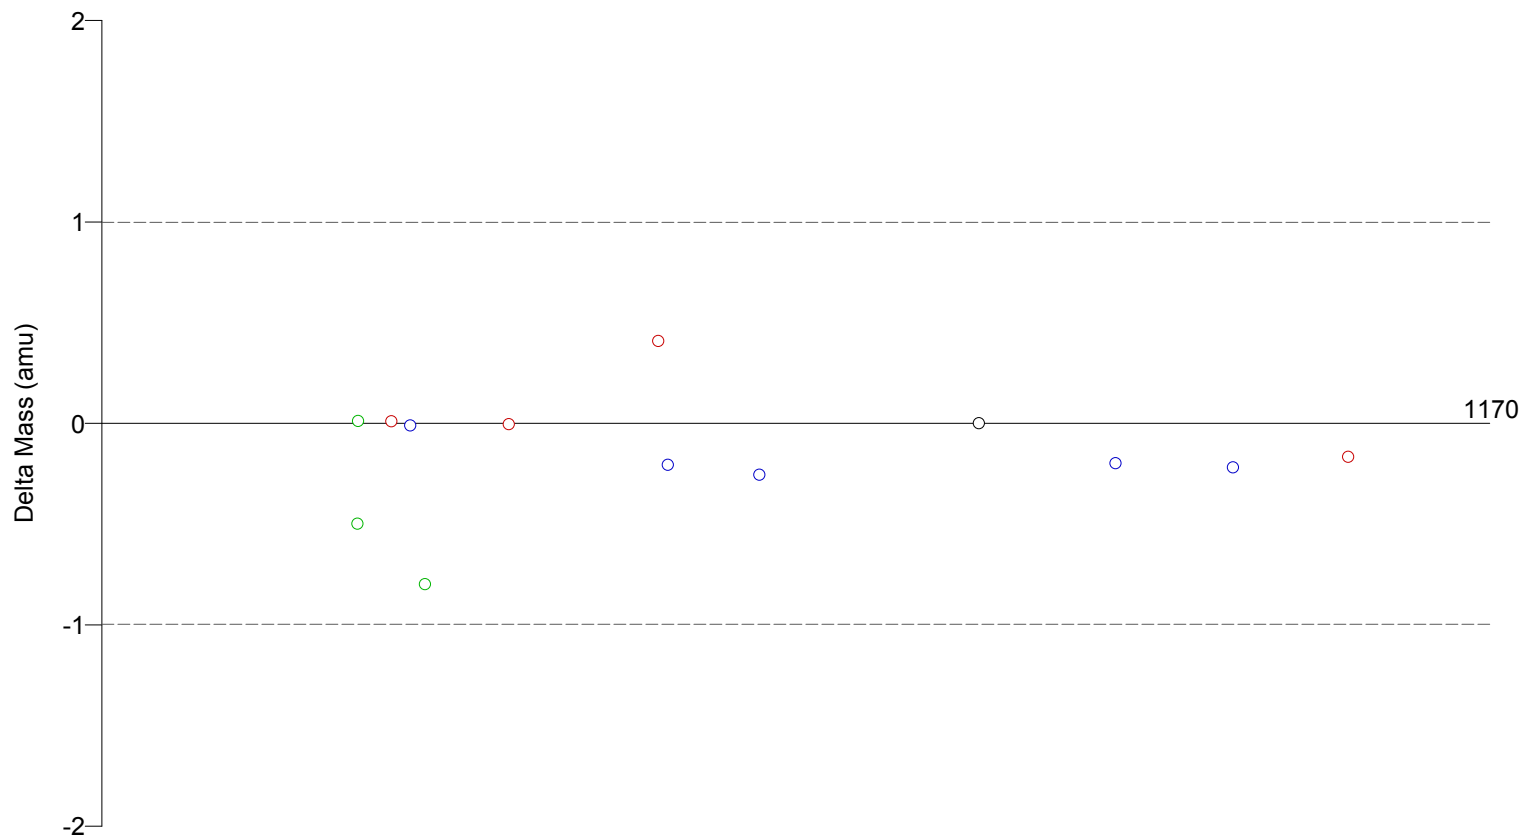

#19287468-1 NL: 9.45E4



---

| Reference                                                      |             |         |   | P   | Score | Coverage | Accession |     |      |       |
|----------------------------------------------------------------|-------------|---------|---|-----|-------|----------|-----------|-----|------|-------|
| Scan(s)                                                        | Sequence    | MH+     | z | P   | XC    | DeltaCn  | Sp        | RSp | Ions | Count |
| IPI:IPI00418876.3 SWISS-PROT:Q70Z35-1 TREMBL:B4DFX0 ENSEMBL:EN |             |         |   | 1   | 8.1   | 0.0      | 0         |     |      |       |
| 19287468 - 1                                                   | K.LSCPRLR.L | 1030.58 | 2 | 0.9 | 1.753 | 0.426    | 105.7     | 3   | 9/21 | 1     |

---

1 of 1 peptide matches reported, 0 removed due to filtering



DTA for scans: 19287468-1  
Precursor ion: 515.79  
Mass type: mono  
Mod's: (M\* +15.99492) C=161.01468

Ion series for charge: +1

| AA | A ions        | B ions        | B* ions | Bo ions | C ions | Y ions        | Y* ions | Yo ions | Z ions |
|----|---------------|---------------|---------|---------|--------|---------------|---------|---------|--------|
| L  | 86.10         | 114.09        |         |         |        |               |         |         |        |
| S  | <b>173.13</b> | <b>201.12</b> |         |         |        | <b>917.50</b> |         |         |        |
| C  | 334.14        | 362.14        |         |         |        | <b>830.47</b> |         |         |        |
| P  | 431.20        | 459.19        |         |         |        | 669.45        |         |         |        |
| K  | 559.29        | 587.29        |         |         |        | 572.40        |         |         |        |
| R  | 715.39        | <b>743.39</b> |         |         |        | 444.30        |         |         |        |
| L  | <b>828.48</b> | 856.47        |         |         |        | <b>288.20</b> |         |         |        |
| R  |               |               |         |         |        | 175.12        |         |         |        |

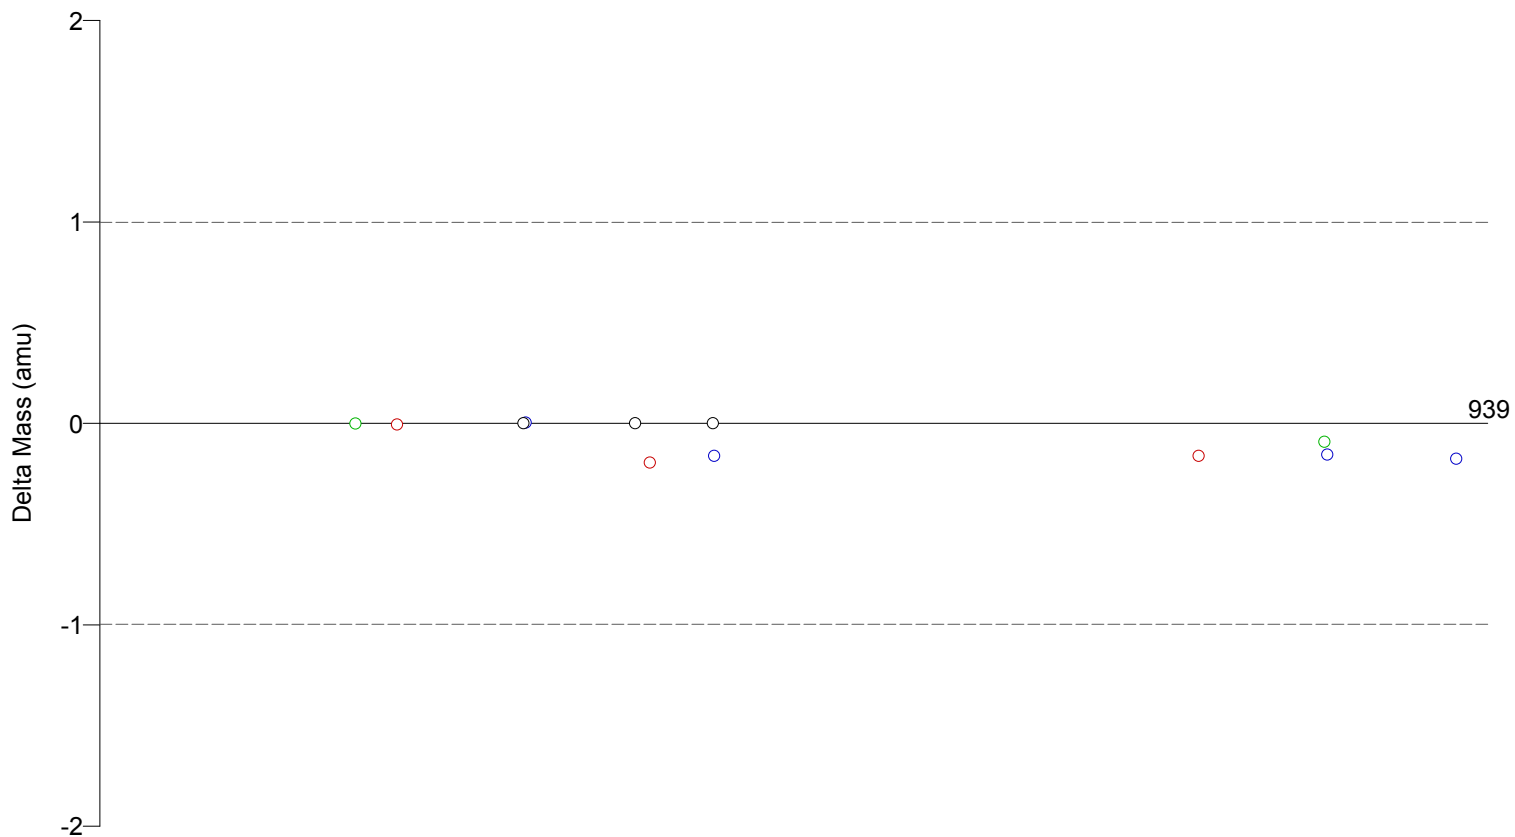

#19287468-1 NL: 6.13E5

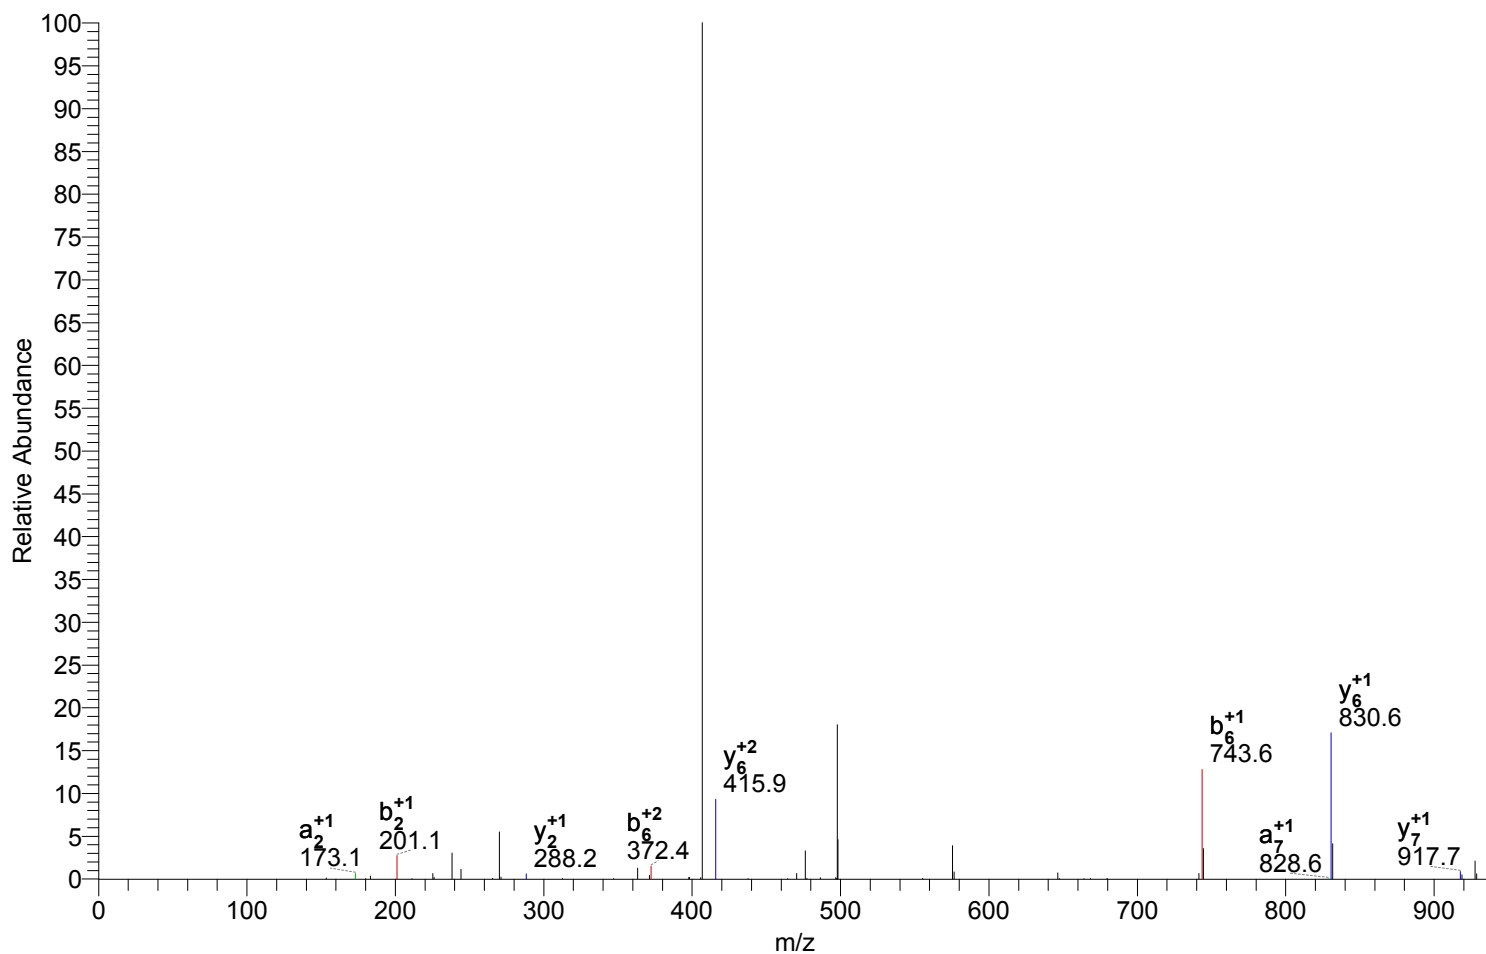

---

| Reference                          |             |         |   | P   | Score | Coverage | Accession |     |      |       |
|------------------------------------|-------------|---------|---|-----|-------|----------|-----------|-----|------|-------|
| Scan(s)                            | Sequence    | MH+     | z | P   | XC    | DeltaCn  | Sp        | RSp | Ions | Count |
| IPI:IPI00845229.1 SWISS-PROT:Q70Z3 |             |         |   | 1   | 8.1   | 0.0      | 0         |     |      |       |
| 19287468 - 1                       | K.LSCPRLR.L | 1030.58 | 2 | 0.9 | 1.753 | 0.426    | 105.7     | 3   | 9/21 | 1     |

---

1 of 1 peptide matches reported, 0 removed due to filtering

DTA for scans: 19287468-1  
Precursor ion: 515.79  
Mass type: mono  
Mod's: (M\* +15.99492) C=161.01468

Ion series for charge: +1

| AA | A ions        | B ions        | B* ions | Bo ions | C ions | Y ions        | Y* ions | Yo ions | Z ions |
|----|---------------|---------------|---------|---------|--------|---------------|---------|---------|--------|
| L  | 86.10         | 114.09        |         |         |        |               |         |         |        |
| S  | <b>173.13</b> | <b>201.12</b> |         |         |        | <b>917.50</b> |         |         |        |
| C  | 334.14        | 362.14        |         |         |        | <b>830.47</b> |         |         |        |
| P  | 431.20        | 459.19        |         |         |        | 669.45        |         |         |        |
| K  | 559.29        | 587.29        |         |         |        | 572.40        |         |         |        |
| R  | 715.39        | <b>743.39</b> |         |         |        | 444.30        |         |         |        |
| L  | <b>828.48</b> | 856.47        |         |         |        | <b>288.20</b> |         |         |        |
| R  |               |               |         |         |        | 175.12        |         |         |        |

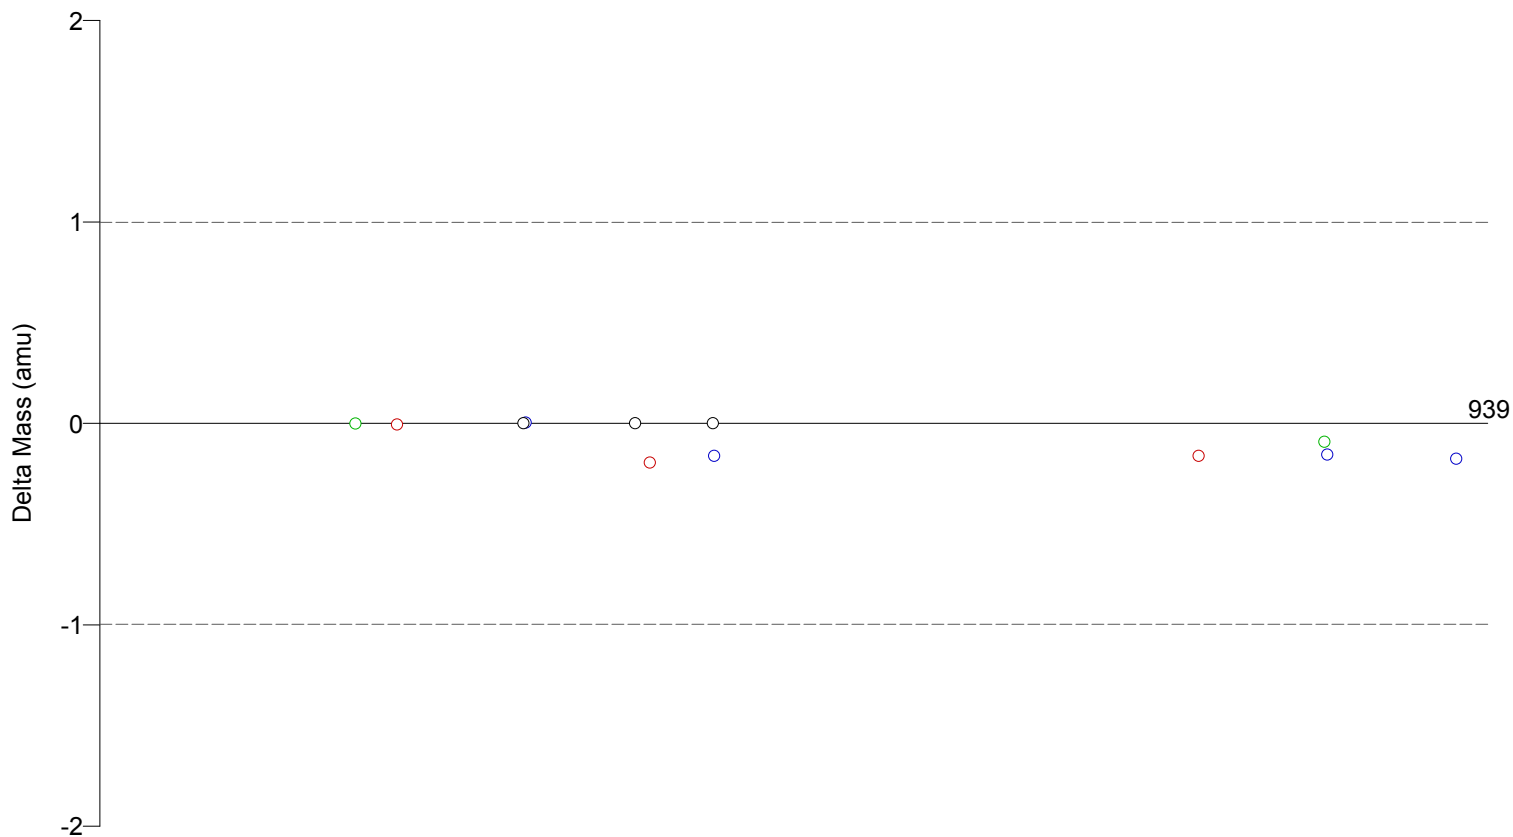

#19287468-1 NL: 6.13E5



---

| Reference                                                     |              |        |   | P   | Score | Coverage | Accession |     |      |       |
|---------------------------------------------------------------|--------------|--------|---|-----|-------|----------|-----------|-----|------|-------|
| Scan(s)                                                       | Sequence     | MH+    | z | P   | XC    | DeltaCn  | Sp        | RSp | Ions | Count |
| IPI:IPI00294519.2 SWISS-PROT:Q99973-1 ENSEMBL:ENSP00000262715 |              |        |   | 1   | 8.1   | 0.0      | 0         |     |      |       |
| 19287468 - 1                                                  | R.QLLTRPHK.A | 992.60 | 2 | 0.8 | 1.747 | 0.306    | 184.8     | 5   | 8/21 | 1     |

---

1 of 1 peptide matches reported, 0 removed due to filtering

DTA for scans: 19287468-1  
Precursor ion: 496.79  
Mass type: mono  
Mod's: (M\* +15.99492) C=161.01468

Ion series for charge: +1

| AA | A ions        | B ions        | B* ions | Bo ions | C ions | Y ions        | Y* ions | Yo ions | Z ions |
|----|---------------|---------------|---------|---------|--------|---------------|---------|---------|--------|
| Q  | 101.07        | 129.07        |         |         |        |               |         |         |        |
| L  | 214.16        | <b>242.15</b> |         |         |        | <b>864.54</b> |         |         |        |
| L  | 327.24        | <b>355.23</b> |         |         |        | <b>751.46</b> |         |         |        |
| T  | 428.29        | 456.28        |         |         |        | <b>638.37</b> |         |         |        |
| R  | <b>584.39</b> | 612.38        |         |         |        | 537.33        |         |         |        |
| P  | 681.44        | 709.44        |         |         |        | 381.22        |         |         |        |
| H  | 818.50        | <b>846.49</b> |         |         |        | 284.17        |         |         |        |
| K  |               |               |         |         |        | <b>147.11</b> |         |         |        |

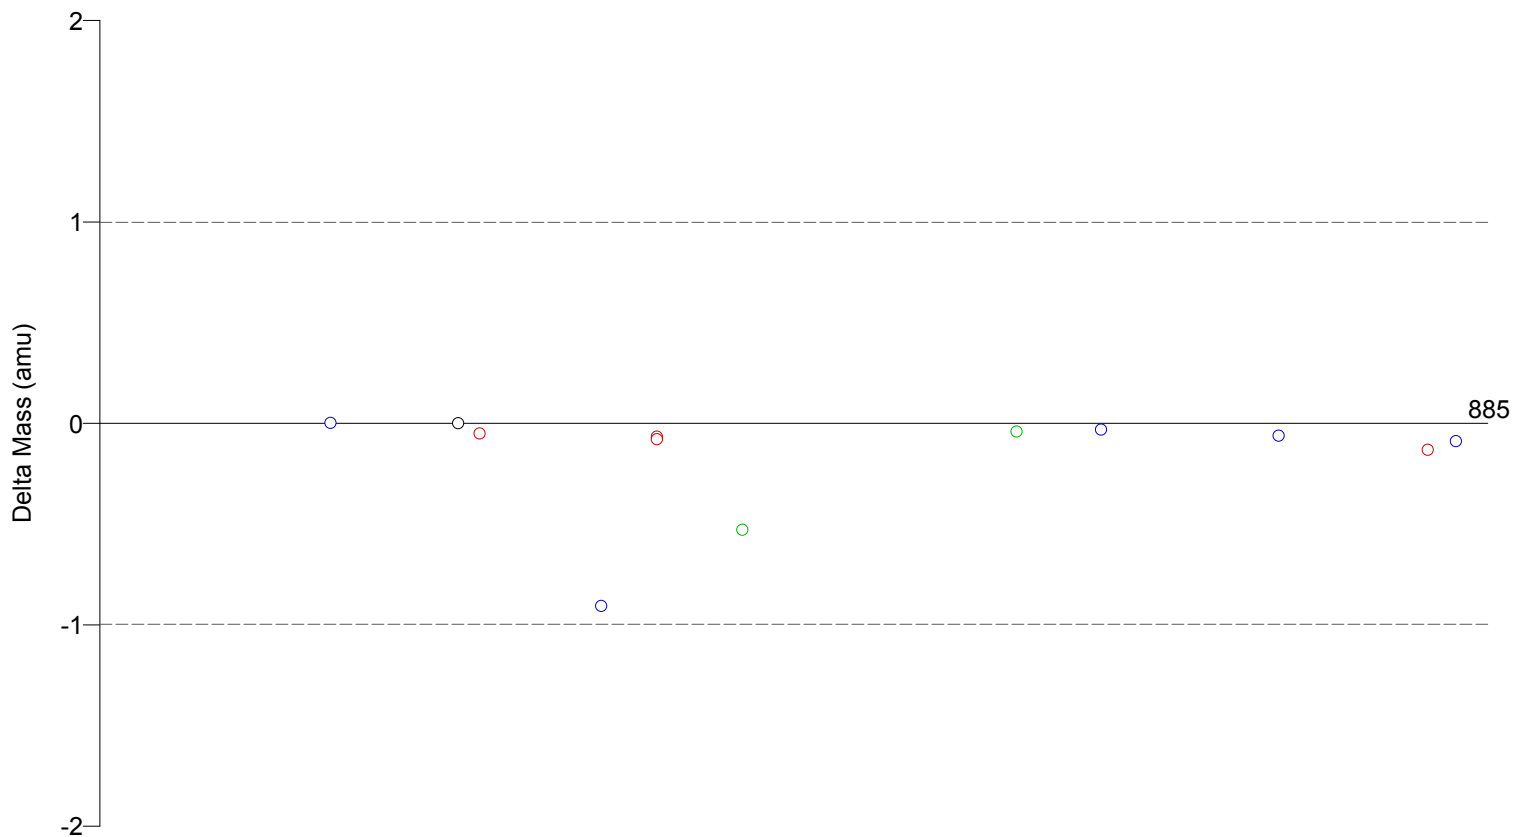

#19287468-1 NL: 1.35E5

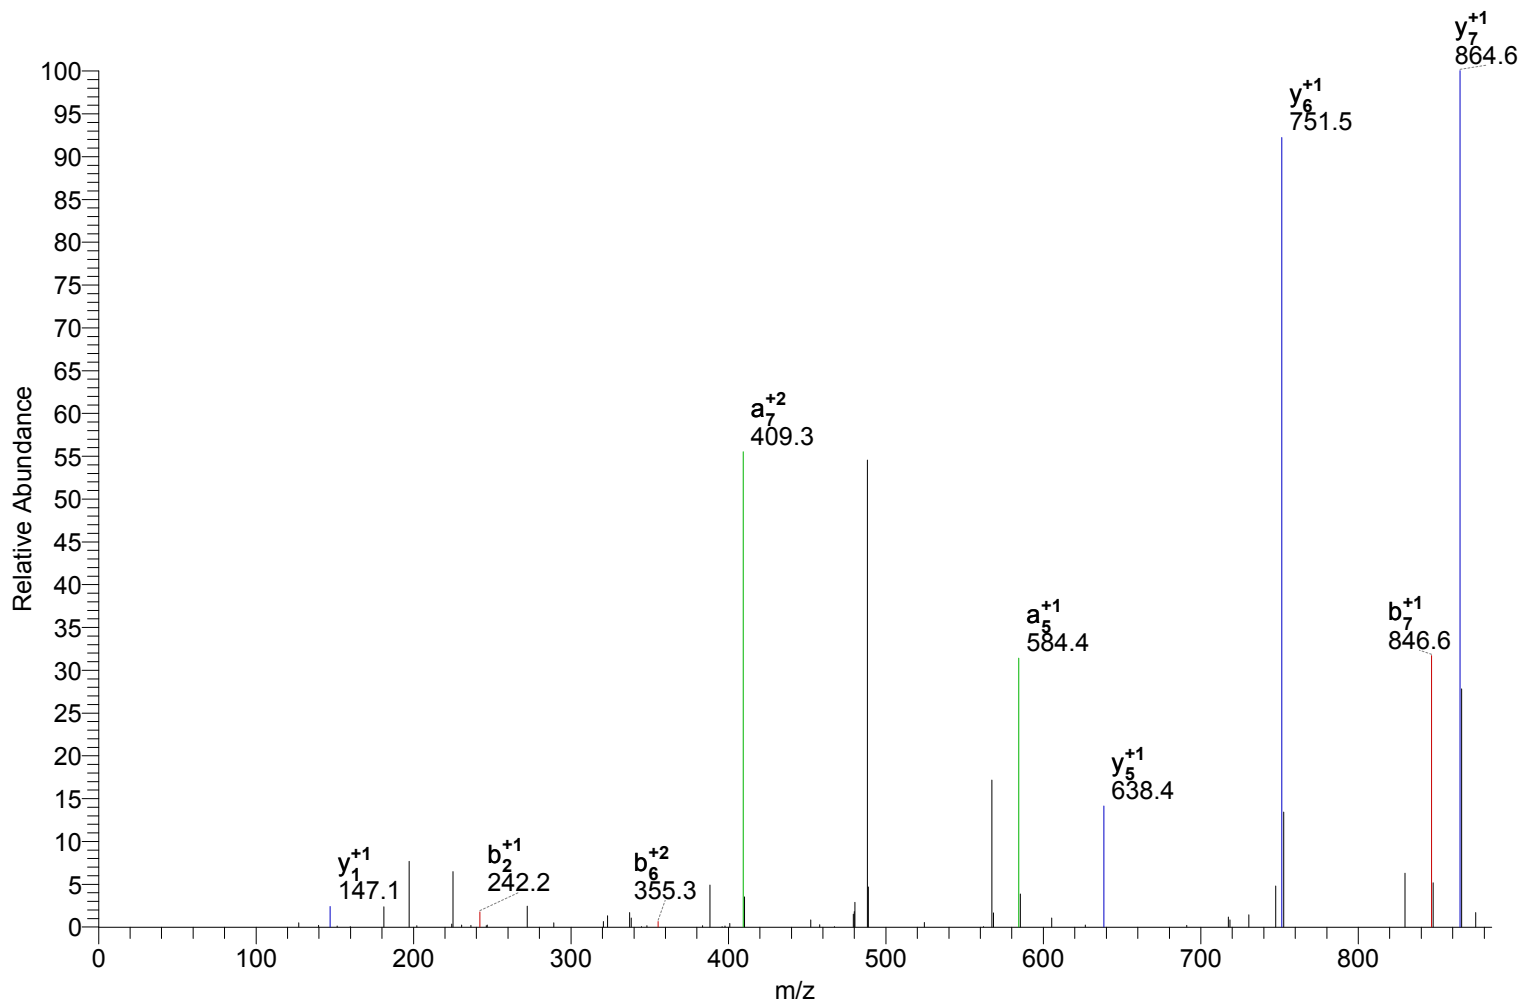



---

| Reference                          |              |        |   | P   | Score | Coverage | Accession |     |      |       |
|------------------------------------|--------------|--------|---|-----|-------|----------|-----------|-----|------|-------|
| Scan(s)                            | Sequence     | MH+    | z | P   | XC    | DeltaCn  | Sp        | RSp | Ions | Count |
| IPI:IPI00413874.2 SWISS-PROT:Q9997 |              |        |   | 1   | 8.1   | 0.0      | 0         |     |      |       |
| 19287468 - 1                       | R.QLLTRPHK.A | 992.60 | 2 | 0.8 | 1.747 | 0.306    | 184.8     | 5   | 8/21 | 1     |

---

1 of 1 peptide matches reported, 0 removed due to filtering

DTA for scans: 19287468-1  
Precursor ion: 496.79  
Mass type: mono  
Mod's: (M\* +15.99492) C=161.01468

Ion series for charge: +1

| AA | A ions        | B ions        | B* ions | Bo ions | C ions | Y ions        | Y* ions | Yo ions | Z ions |
|----|---------------|---------------|---------|---------|--------|---------------|---------|---------|--------|
| Q  | 101.07        | 129.07        |         |         |        |               |         |         |        |
| L  | 214.16        | <b>242.15</b> |         |         |        | <b>864.54</b> |         |         |        |
| L  | 327.24        | <b>355.23</b> |         |         |        | <b>751.46</b> |         |         |        |
| T  | 428.29        | 456.28        |         |         |        | <b>638.37</b> |         |         |        |
| R  | <b>584.39</b> | 612.38        |         |         |        | 537.33        |         |         |        |
| P  | 681.44        | 709.44        |         |         |        | 381.22        |         |         |        |
| H  | 818.50        | <b>846.49</b> |         |         |        | 284.17        |         |         |        |
| K  |               |               |         |         |        | <b>147.11</b> |         |         |        |

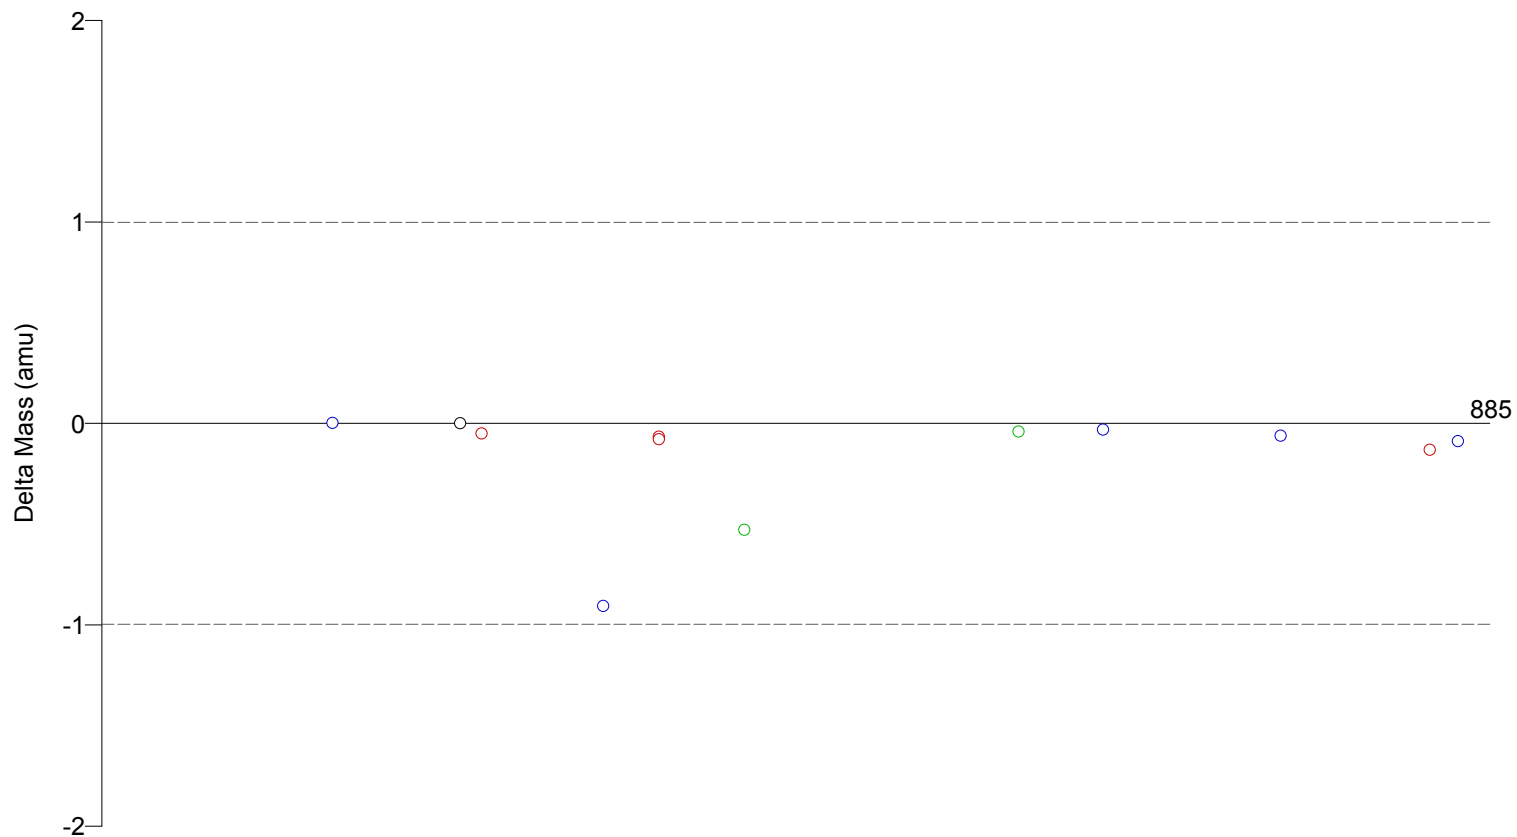

#19287468-1 NL: 1.35E5



---

| Reference                                                      |          |         |   | P   | Score | Coverage | Accession |     |      |       |
|----------------------------------------------------------------|----------|---------|---|-----|-------|----------|-----------|-----|------|-------|
| Scan(s)                                                        | Sequence | MH+     | z | P   | XC    | DeltaCn  | Sp        | RSp | Ions | Count |
| IPI:IPI00448364.1 TREMBL:Q6IEV0 H-INV:HIT000391565 Tax_Id=9606 |          |         |   | 1   | 8.1   | 0.0      |           | 0   |      |       |
| 2118291816 - R.IHSTQGRIK.V                                     |          | 1039.60 | 2 | 0.4 | 1.729 | 0.349    | 149.9     | 3   | 9/24 |       |

---

1 of 1 peptide matches reported, 0 removed due to filtering

DTA for scans: 2118291816-26226248  
Precursor ion: 520.31  
Mass type: mono  
Mod's: (M\* +15.99492) C=161.01468

Ion series for charge: +1

| AA | A ions        | B ions        | B* ions | Bo ions | C ions | Y ions        | Y* ions | Yo ions | Z ions |
|----|---------------|---------------|---------|---------|--------|---------------|---------|---------|--------|
| I  | 86.10         | 114.09        |         |         |        |               |         |         |        |
| H  | <b>223.16</b> | <b>251.15</b> |         |         |        | 926.52        |         |         |        |
| S  | 310.19        | 338.18        |         |         |        | <b>789.46</b> |         |         |        |
| T  | 411.24        | 439.23        |         |         |        | 702.43        |         |         |        |
| Q  | 539.29        | 567.29        |         |         |        | <b>601.38</b> |         |         |        |
| G  | 596.32        | 624.31        |         |         |        | <b>473.32</b> |         |         |        |
| R  | 752.42        | <b>780.41</b> |         |         |        | 416.30        |         |         |        |
| I  | 865.50        | <b>893.50</b> |         |         |        | <b>260.20</b> |         |         |        |
| K  |               |               |         |         |        | 147.11        |         |         |        |

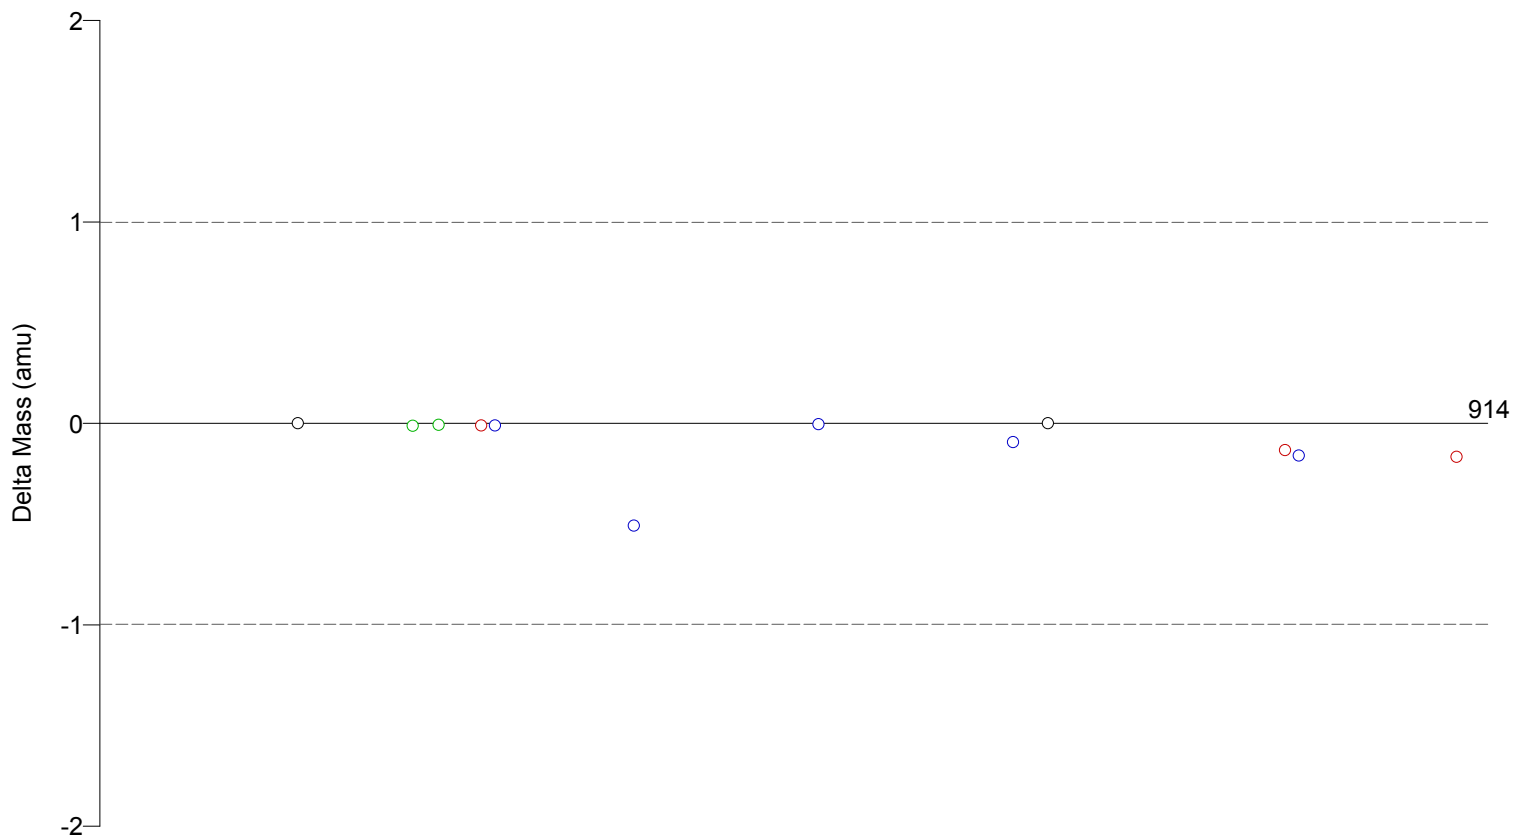

#2118291816-26226248 NL: 1.52E5

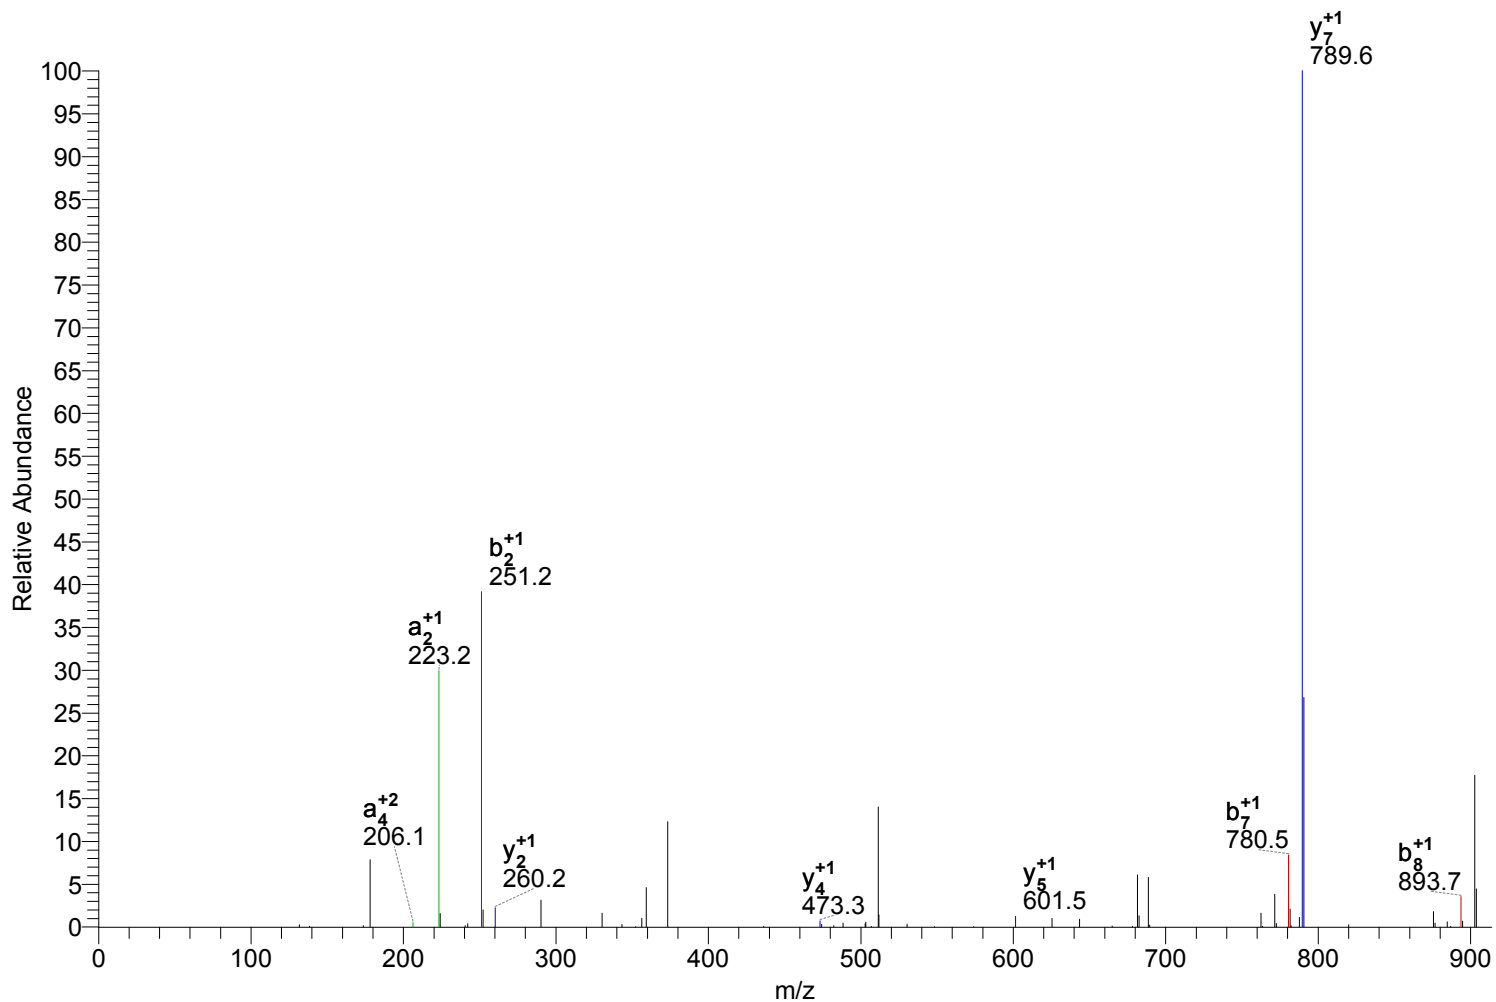

---

| Reference                                                      |                   |         |   | P | Score | Coverage | Accession |     |      |       |
|----------------------------------------------------------------|-------------------|---------|---|---|-------|----------|-----------|-----|------|-------|
| Scan(s)                                                        | Sequence          | MH+     | z | P | XC    | DeltaCn  | Sp        | RSp | Ions | Count |
| IPI:IPI00307200.9 SWISS-PROT:Q9UH65 TREMBL:B4E245 ENSEMBL:ENSP |                   |         |   | 1 | 8.1   | 0.0      | 0         |     |      |       |
| 19287468 - 1                                                   | K.KLEEAASRAAEEK.K | 1560.79 | 2 | 1 | 1.699 | 0.383    | 106.1     | 4   | 9/39 | 1     |

1 of 1 peptide matches reported, 0 removed due to filtering

DTA for scans: 19287468-1  
Precursor ion: 780.88  
Mass type: mono  
Mod's: (M\* +15.99492) C=161.01468

Ion series for charge: +1

| AA | A ions        | B ions         | B* ions | Bo ions | C ions | Y ions         | Y* ions | Yo ions | Z ions |
|----|---------------|----------------|---------|---------|--------|----------------|---------|---------|--------|
| K  | 101.11        | 129.10         |         |         |        |                |         |         |        |
| L  | <b>214.19</b> | <b>242.19</b>  |         |         |        | 1432.69        |         |         |        |
| E  | 343.23        | <b>371.23</b>  |         |         |        | <b>1319.61</b> |         |         |        |
| E  | 472.28        | <b>500.27</b>  |         |         |        | <b>1190.56</b> |         |         |        |
| A  | 543.31        | 571.31         |         |         |        | 1061.52        |         |         |        |
| A  | 614.35        | 642.35         |         |         |        | 990.49         |         |         |        |
| S  | 701.38        | <b>729.38</b>  |         |         |        | 919.45         |         |         |        |
| R  | 857.48        | 885.48         |         |         |        | 832.42         |         |         |        |
| A  | 928.52        | 956.52         |         |         |        | 676.31         |         |         |        |
| A  | 999.56        | 1027.55        |         |         |        | 605.28         |         |         |        |
| E  | 1128.60       | 1156.60        |         |         |        | 534.24         |         |         |        |
| E  | 1257.64       | <b>1285.64</b> |         |         |        | 405.20         |         |         |        |
| E  | 1386.69       | <b>1414.68</b> |         |         |        | <b>276.16</b>  |         |         |        |
| K  |               |                |         |         |        | 147.11         |         |         |        |



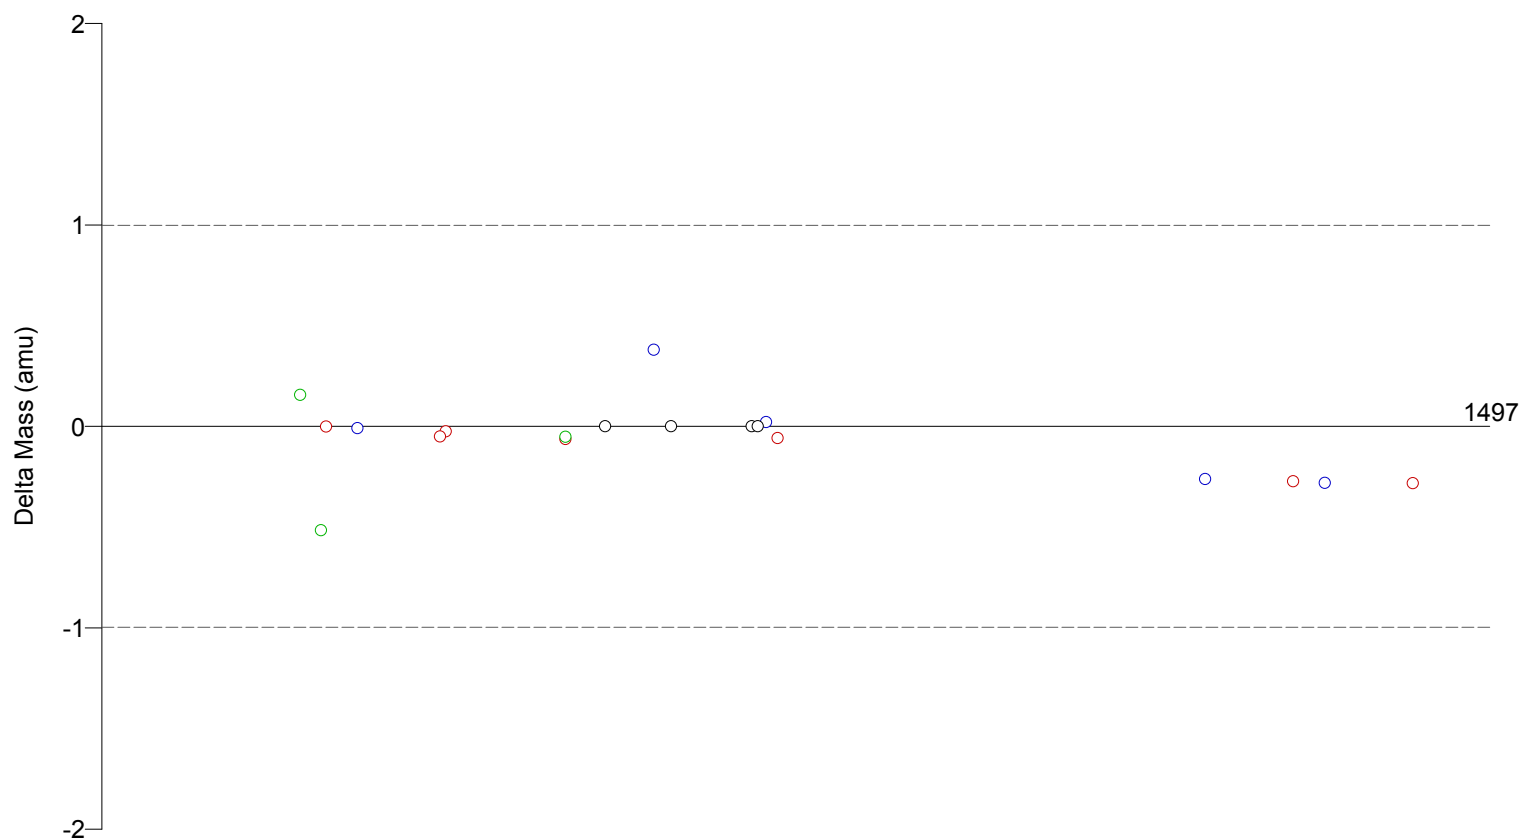

#19287468-1 NL: 6.84E4

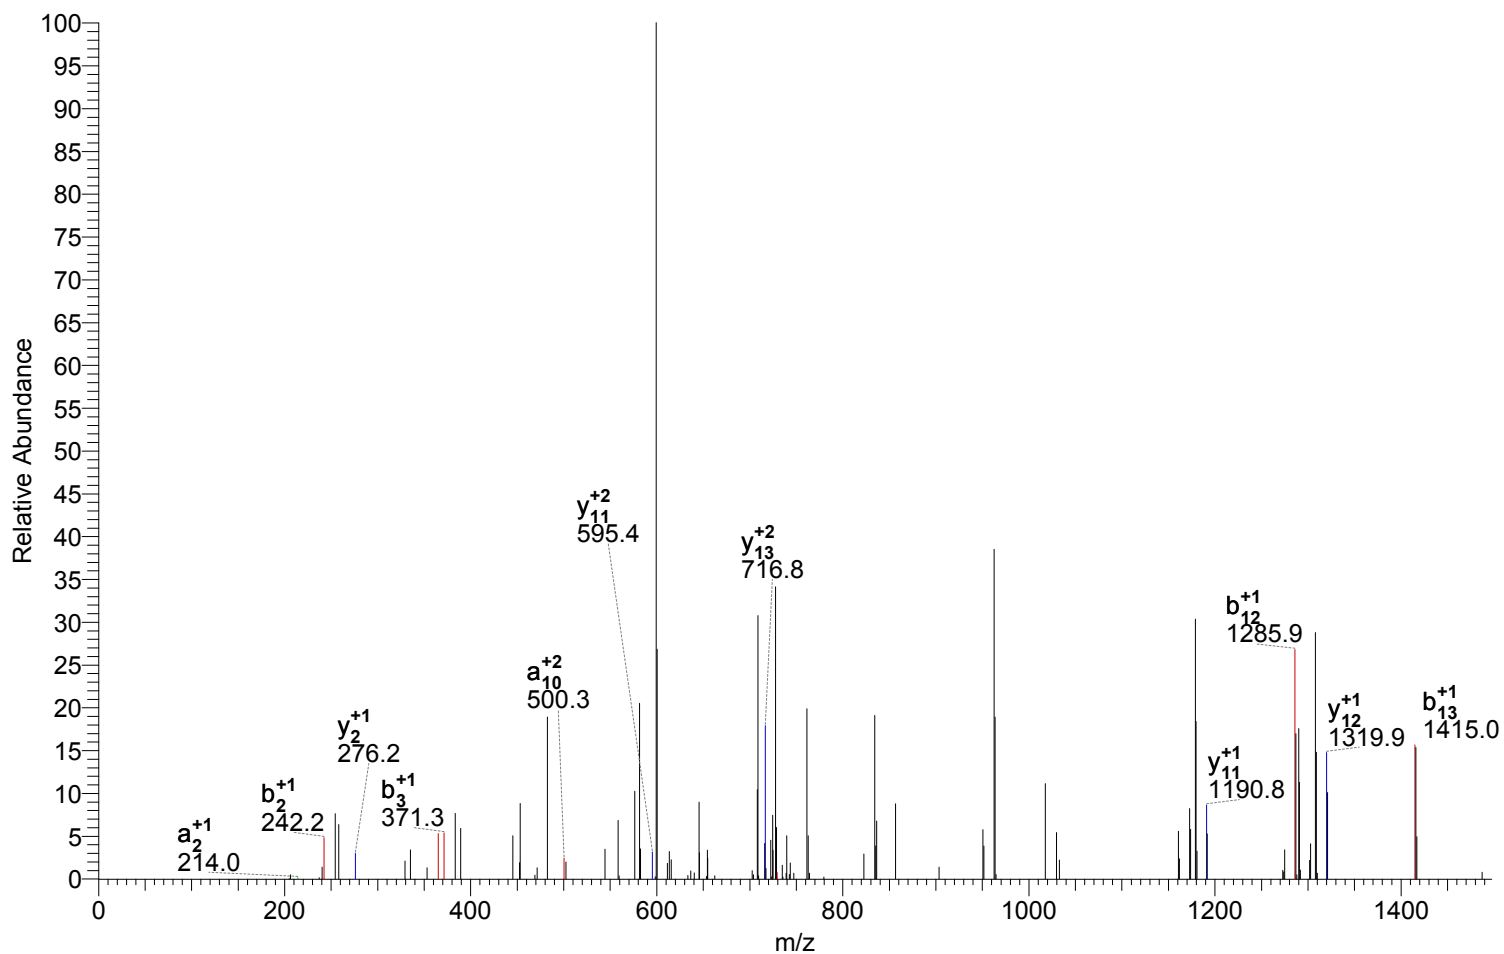

---

| Reference                          |                   |         |   | P | Score | Coverage | Accession |     |      |       |
|------------------------------------|-------------------|---------|---|---|-------|----------|-----------|-----|------|-------|
| Scan(s)                            | Sequence          | MH+     | z | P | XC    | DeltaCn  | Sp        | RSp | Ions | Count |
| IPI:IPI00903155.1 TREMBL:B3KUB9 Ta |                   |         |   | 1 | 8.1   | 0.0      | 0         |     |      |       |
| 19287468 - 1                       | K.KLEEAASRAAEEK.K | 1560.79 | 2 | 1 | 1.699 | 0.383    | 106.1     | 4   | 9/39 | 1     |

1 of 1 peptide matches reported, 0 removed due to filtering

DTA for scans: 19287468-1  
Precursor ion: 780.88  
Mass type: mono  
Mod's: (M\* +15.99492) C=161.01468

Ion series for charge: +1

| AA | A ions        | B ions         | B* ions | Bo ions | C ions | Y ions         | Y* ions | Yo ions | Z ions |
|----|---------------|----------------|---------|---------|--------|----------------|---------|---------|--------|
| K  | 101.11        | 129.10         |         |         |        |                |         |         |        |
| L  | <b>214.19</b> | <b>242.19</b>  |         |         |        | 1432.69        |         |         |        |
| E  | 343.23        | <b>371.23</b>  |         |         |        | <b>1319.61</b> |         |         |        |
| E  | 472.28        | <b>500.27</b>  |         |         |        | <b>1190.56</b> |         |         |        |
| A  | 543.31        | 571.31         |         |         |        | 1061.52        |         |         |        |
| A  | 614.35        | 642.35         |         |         |        | 990.49         |         |         |        |
| S  | 701.38        | <b>729.38</b>  |         |         |        | 919.45         |         |         |        |
| R  | 857.48        | 885.48         |         |         |        | 832.42         |         |         |        |
| A  | 928.52        | 956.52         |         |         |        | 676.31         |         |         |        |
| A  | 999.56        | 1027.55        |         |         |        | 605.28         |         |         |        |
| E  | 1128.60       | 1156.60        |         |         |        | 534.24         |         |         |        |
| E  | 1257.64       | <b>1285.64</b> |         |         |        | 405.20         |         |         |        |
| E  | 1386.69       | <b>1414.68</b> |         |         |        | <b>276.16</b>  |         |         |        |
| K  |               |                |         |         |        | 147.11         |         |         |        |

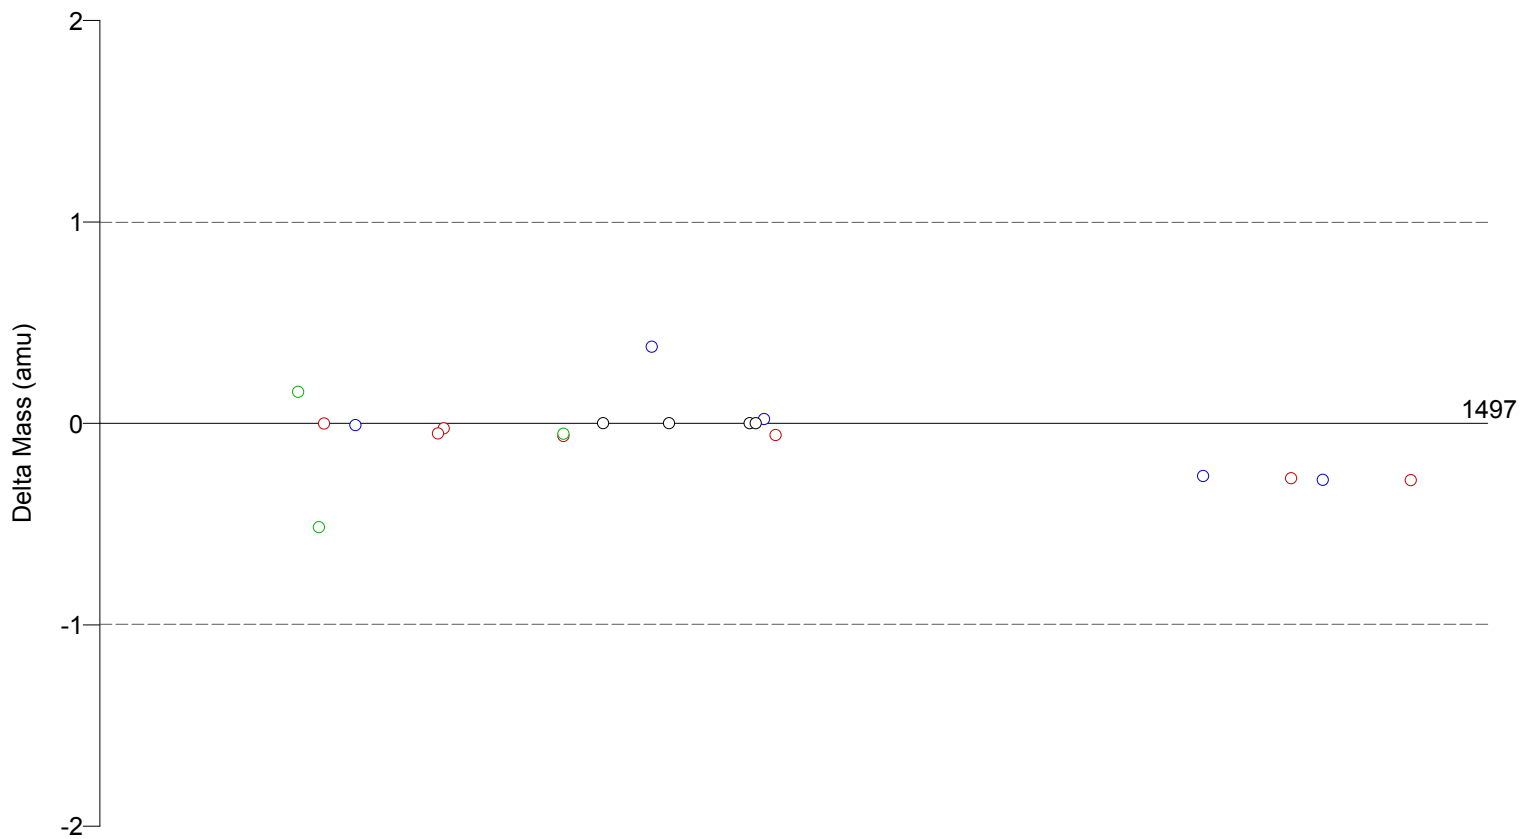

#19287468-1 NL: 6.84E4



---

| Reference                                                      |          |         |   | P   | Score | Coverage | Accession |     |       |       |  |
|----------------------------------------------------------------|----------|---------|---|-----|-------|----------|-----------|-----|-------|-------|--|
| Scan(s)                                                        | Sequence | MH+     | z | P   | XC    | DeltaCn  | Sp        | RSp | Ions  | Count |  |
| IPI:IPI00022963.3 SWISS-PROT:O95926 TREMBL:B2RBX8;B4E0Y8 ENSEM |          |         |   | 1   | 8.1   | 0.0      | 0         |     |       |       |  |
| 2118291816 - K.PDMETYERLREK.H                                  |          | 1566.76 | 3 | 0.5 | 1.657 | 0.583    | 147.7     | 12  | 14/66 | 1     |  |

---

1 of 1 peptide matches reported, 0 removed due to filtering

DTA for scans: 2118291816-26226248  
Precursor ion: 522.91  
Mass type: mono  
Mod's: (M\* +15.99492) C=161.01468

Ion series for charge: +1

| AA | A ions        | B ions        | B* ions | Bo ions | C ions | Y ions        | Y* ions | Yo ions | Z ions |
|----|---------------|---------------|---------|---------|--------|---------------|---------|---------|--------|
| P  | 70.07         | 98.06         |         |         |        |               |         |         |        |
| D  | <b>185.09</b> | 213.09        |         |         |        | 1469.71       |         |         |        |
| M  | 316.13        | 344.13        |         |         |        | 1354.68       |         |         |        |
| E  | 445.18        | 473.17        |         |         |        | 1223.64       |         |         |        |
| T  | <b>546.22</b> | 574.22        |         |         |        | 1094.60       |         |         |        |
| Y  | 709.29        | <b>737.28</b> |         |         |        | 993.55        |         |         |        |
| E  | 838.33        | <b>866.32</b> |         |         |        | <b>830.48</b> |         |         |        |
| R  | 994.43        | 1022.42       |         |         |        | <b>701.44</b> |         |         |        |
| L  | 1107.51       | 1135.51       |         |         |        | 545.34        |         |         |        |
| R  | 1263.62       | 1291.61       |         |         |        | 432.26        |         |         |        |
| E  | 1392.66       | 1420.65       |         |         |        | 276.16        |         |         |        |
| K  |               |               |         |         |        | 147.11        |         |         |        |

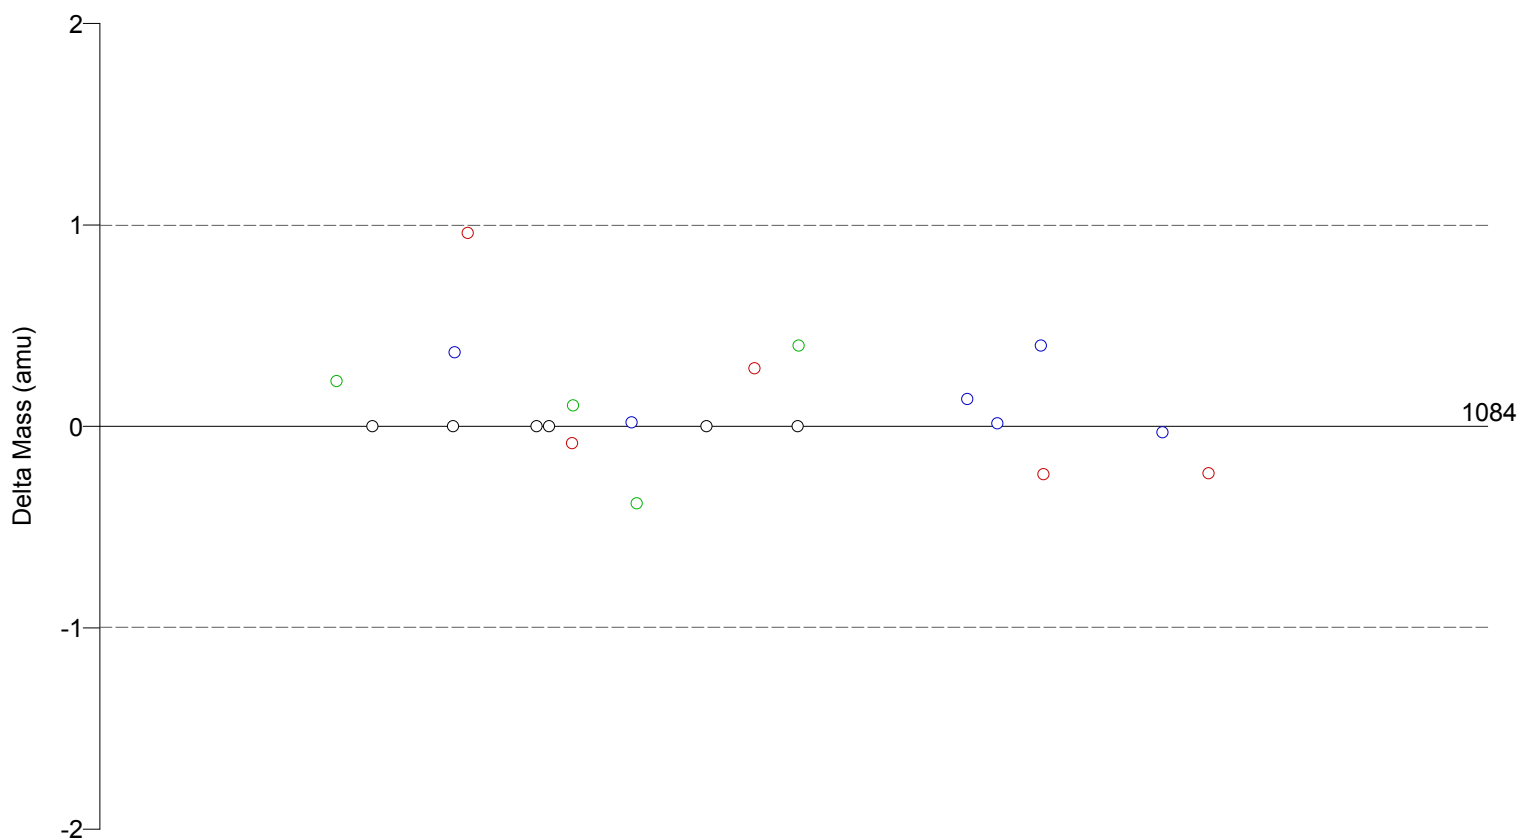

#2118291816-26226248 NL: 8.32E4

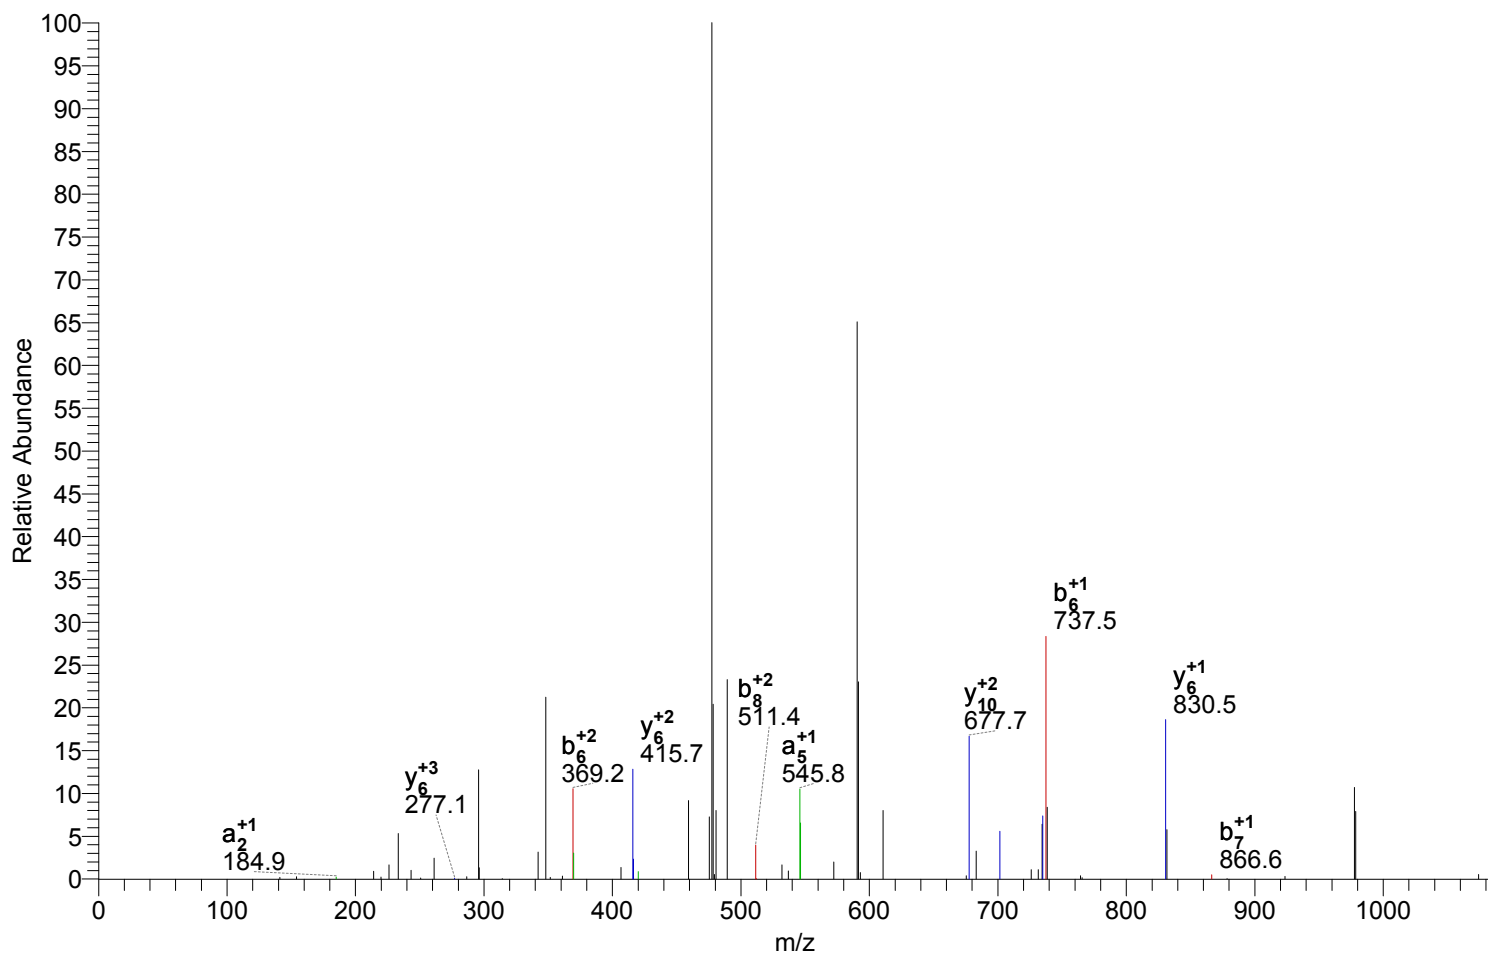

---

| Reference                          |          |         |   | P   | Score | Coverage | Accession |     |       |       |
|------------------------------------|----------|---------|---|-----|-------|----------|-----------|-----|-------|-------|
| Scan(s)                            | Sequence | MH+     | z | P   | XC    | DeltaCn  | Sp        | RSp | Ions  | Count |
| IPI:IPI00410388.1 ENSEMBL:ENSP0000 |          |         |   | 1   | 8.1   | 0.0      | 0         |     |       |       |
| 2118291816 - K.PDMETYERLREK.H      |          | 1566.76 | 3 | 0.5 | 1.657 | 0.583    | 147.7     | 12  | 14/66 | 1     |

---

1 of 1 peptide matches reported, 0 removed due to filtering



DTA for scans: 2118291816-26226248  
Precursor ion: 522.91  
Mass type: mono  
Mod's: (M\* +15.99492) C=161.01468

Ion series for charge: +1

| AA | A ions        | B ions        | B* ions | Bo ions | C ions | Y ions        | Y* ions | Yo ions | Z ions |
|----|---------------|---------------|---------|---------|--------|---------------|---------|---------|--------|
| P  | 70.07         | 98.06         |         |         |        |               |         |         |        |
| D  | <b>185.09</b> | 213.09        |         |         |        | 1469.71       |         |         |        |
| M  | 316.13        | 344.13        |         |         |        | 1354.68       |         |         |        |
| E  | 445.18        | 473.17        |         |         |        | 1223.64       |         |         |        |
| T  | <b>546.22</b> | 574.22        |         |         |        | 1094.60       |         |         |        |
| Y  | 709.29        | <b>737.28</b> |         |         |        | 993.55        |         |         |        |
| E  | 838.33        | <b>866.32</b> |         |         |        | <b>830.48</b> |         |         |        |
| R  | 994.43        | 1022.42       |         |         |        | <b>701.44</b> |         |         |        |
| L  | 1107.51       | 1135.51       |         |         |        | 545.34        |         |         |        |
| R  | 1263.62       | 1291.61       |         |         |        | 432.26        |         |         |        |
| E  | 1392.66       | 1420.65       |         |         |        | 276.16        |         |         |        |
| K  |               |               |         |         |        | 147.11        |         |         |        |

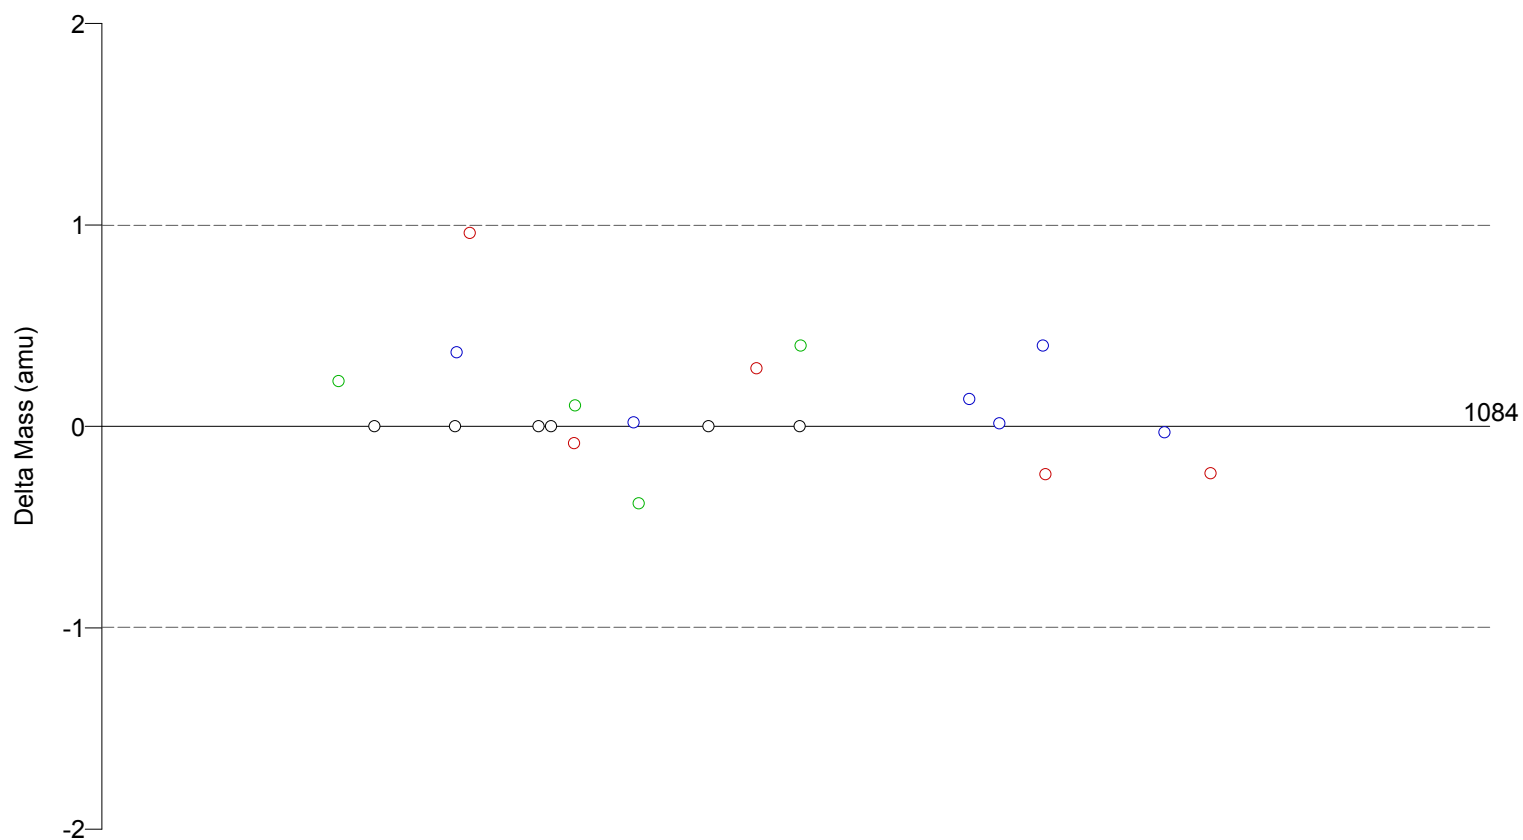

#2118291816-26226248 NL: 8.32E4



---

| Reference                            |                |               |   | P   | Score | Coverage | Accession |     |       |       |  |
|--------------------------------------|----------------|---------------|---|-----|-------|----------|-----------|-----|-------|-------|--|
| Scan(s)                              | Sequence       | MH+           | z | P   | XC    | DeltaCn  | Sp        | RSp | Ions  | Count |  |
| IPI:IPI00929282.1 H-INV:HIT000046184 | Tax_Id=9606    | Gene_Symbol=N | 1 |     | 8.1   | 0.0      | 0         |     |       |       |  |
| 19287468 - 1                         | R.HLLATCDLGR.S | 1156.58       | 2 | 0.6 | 1.635 | 0.619    | 232.9     | 3   | 11/27 |       |  |

---

1 of 1 peptide matches reported, 0 removed due to filtering

DTA for scans: 19287468-1  
Precursor ion: 578.80  
Mass type: mono  
Mod's: (M\* +15.99492) C=161.01468

Ion series for charge: +1

| AA | A ions        | B ions        | B* ions | Bo ions | C ions | Y ions        | Y* ions | Yo ions | Z ions |
|----|---------------|---------------|---------|---------|--------|---------------|---------|---------|--------|
| H  | 110.07        | 138.07        |         |         |        |               |         |         |        |
| L  | 223.16        | 251.15        |         |         |        | 1019.52       |         |         |        |
| L  | 336.24        | <b>364.23</b> |         |         |        | 906.43        |         |         |        |
| A  | 407.28        | 435.27        |         |         |        | 793.35        |         |         |        |
| T  | <b>508.32</b> | <b>536.32</b> |         |         |        | 722.31        |         |         |        |
| C  | 669.34        | 697.33        |         |         |        | <b>621.27</b> |         |         |        |
| D  | 784.37        | <b>812.36</b> |         |         |        | 460.25        |         |         |        |
| L  | 897.45        | <b>925.44</b> |         |         |        | <b>345.22</b> |         |         |        |
| G  | 954.47        | <b>982.47</b> |         |         |        | <b>232.14</b> |         |         |        |
| R  |               |               |         |         |        | 175.12        |         |         |        |

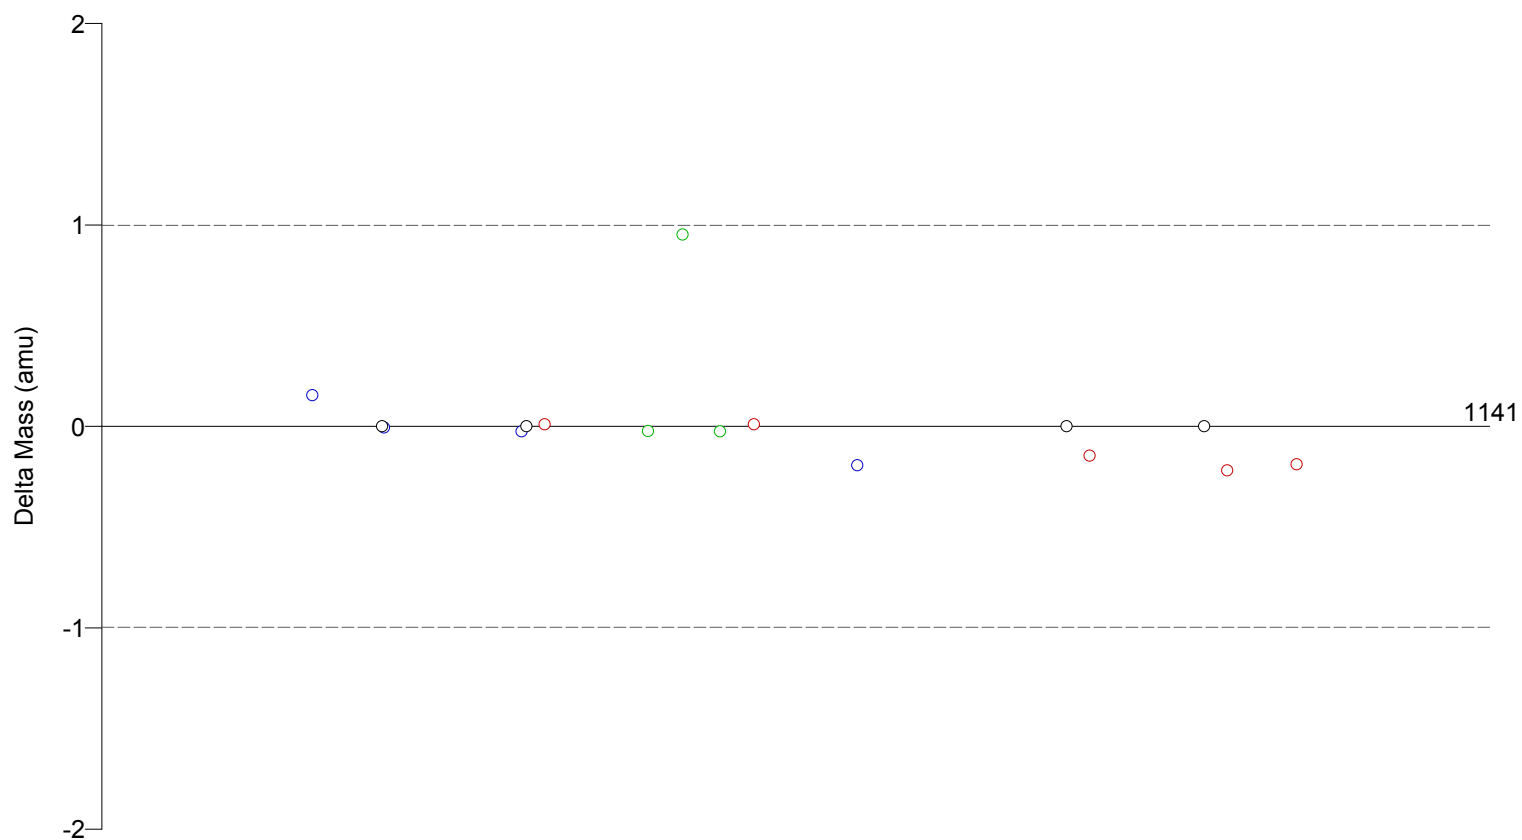

#19287468-1 NL: 1.83E5

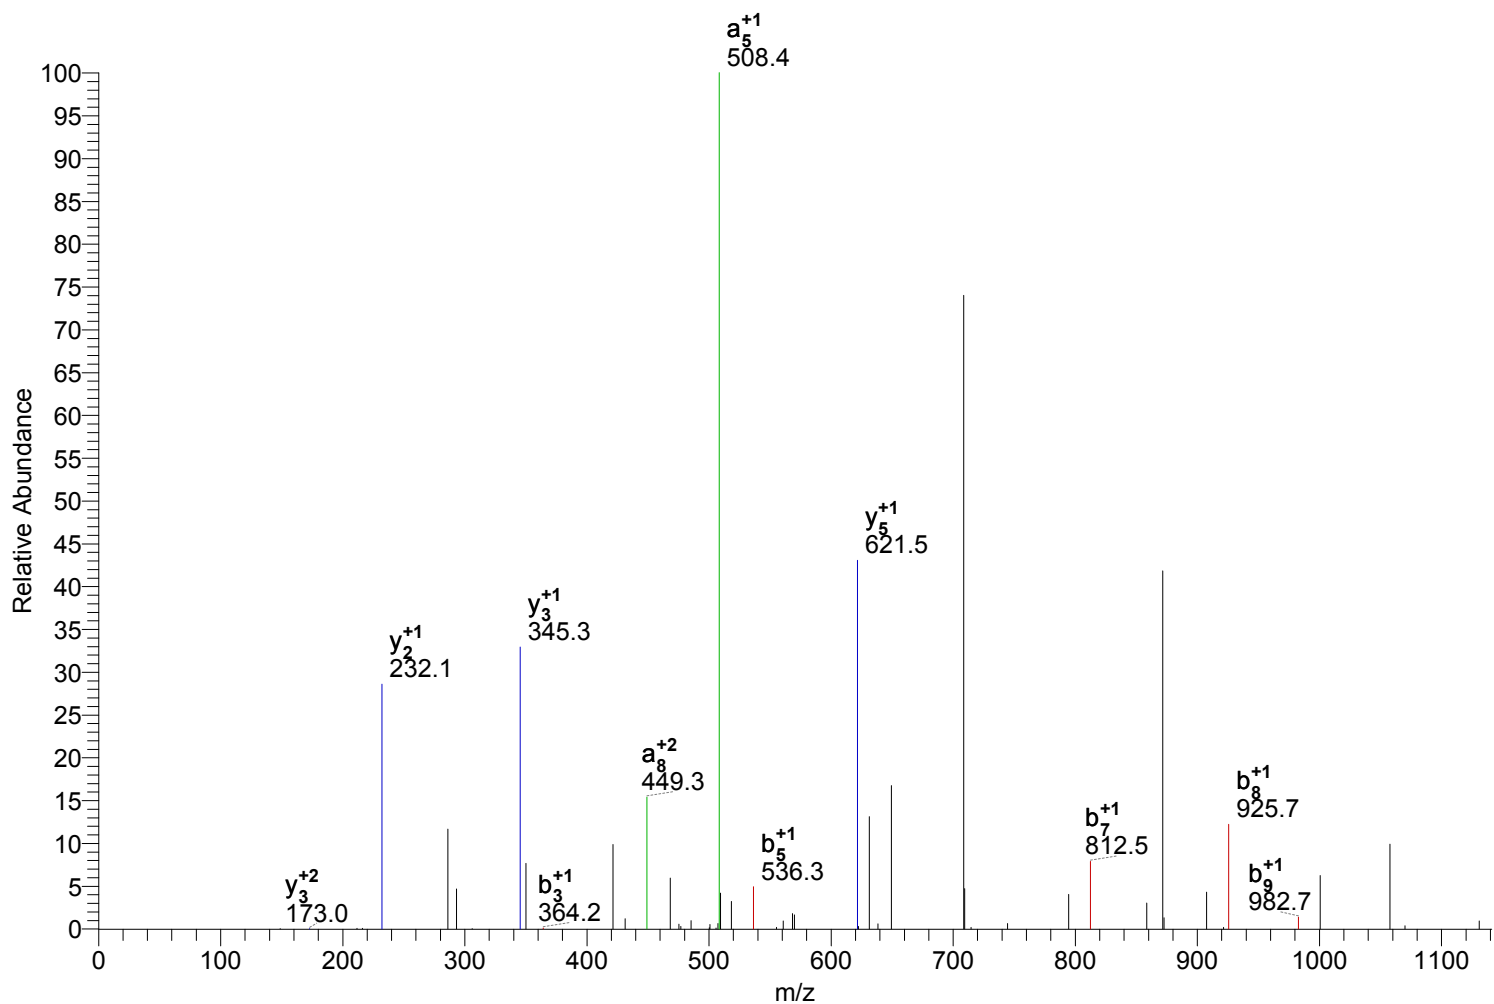

---

| Reference                             |                  |              |   | P   | Score | Coverage | Accession |     |      |       |
|---------------------------------------|------------------|--------------|---|-----|-------|----------|-----------|-----|------|-------|
| Scan(s)                               | Sequence         | MH+          | z | P   | XC    | DeltaCn  | Sp        | RSp | Ions | Count |
| IPI:IPI00937649.1 REFSEQ:XP_002343712 | Tax_Id=9606      | Gene_Symbol= |   | 1   | 8.1   | 0.0      |           | 0   |      |       |
| 19287468 - 1                          | R.GSQATARSSPSR.A | 1220.60      | 2 | 0.6 | 1.630 | 0.445    | 83.5      | 9   | 8/33 |       |

1 of 1 peptide matches reported, 0 removed due to filtering

DTA for scans: 19287468-1  
Precursor ion: 610.81  
Mass type: mono  
Mod's: (M\* +15.99492) C=161.01468

Ion series for charge: +1

| AA | A ions  | B ions        | B* ions | Bo ions | C ions | Y ions        | Y* ions | Yo ions | Z ions |
|----|---------|---------------|---------|---------|--------|---------------|---------|---------|--------|
| G  | 30.03   | 58.03         |         |         |        |               |         |         |        |
| S  | 117.07  | 145.06        |         |         |        | 1163.58       |         |         |        |
| Q  | 245.12  | 273.12        |         |         |        | 1076.54       |         |         |        |
| T  | 346.17  | 374.17        |         |         |        | 948.49        |         |         |        |
| A  | 417.21  | 445.20        |         |         |        | 847.44        |         |         |        |
| R  | 573.31  | 601.31        |         |         |        | <b>776.40</b> |         |         |        |
| S  | 660.34  | 688.34        |         |         |        | 620.30        |         |         |        |
| S  | 747.37  | <b>775.37</b> |         |         |        | 533.27        |         |         |        |
| S  | 834.41  | <b>862.40</b> |         |         |        | 446.24        |         |         |        |
| P  | 931.46  | <b>959.45</b> |         |         |        | <b>359.20</b> |         |         |        |
| S  | 1018.49 | 1046.49       |         |         |        | <b>262.15</b> |         |         |        |
| R  |         |               |         |         |        | <b>175.12</b> |         |         |        |

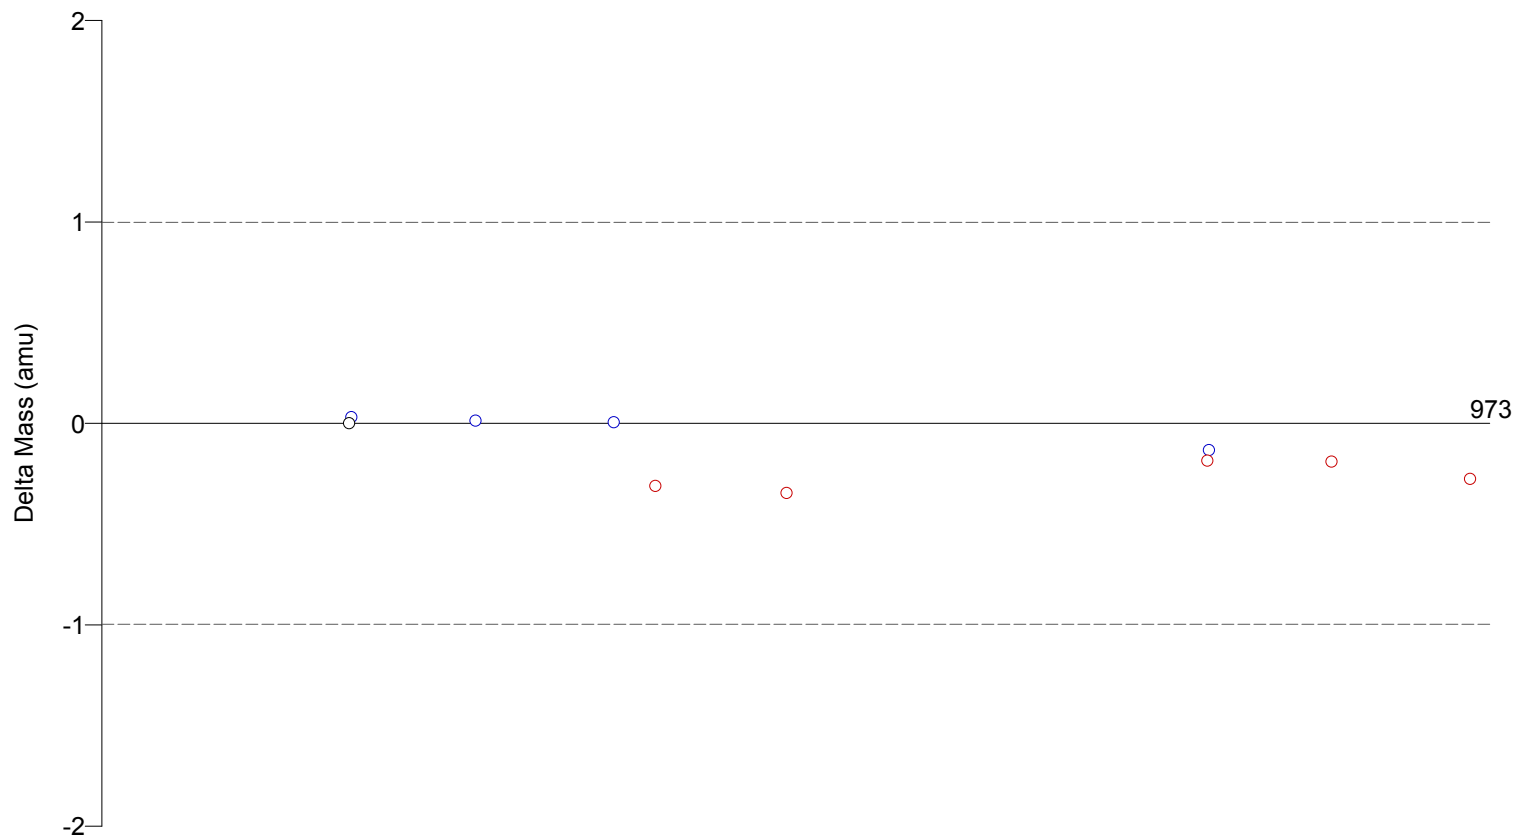

#19287468-1 NL: 1.83E6

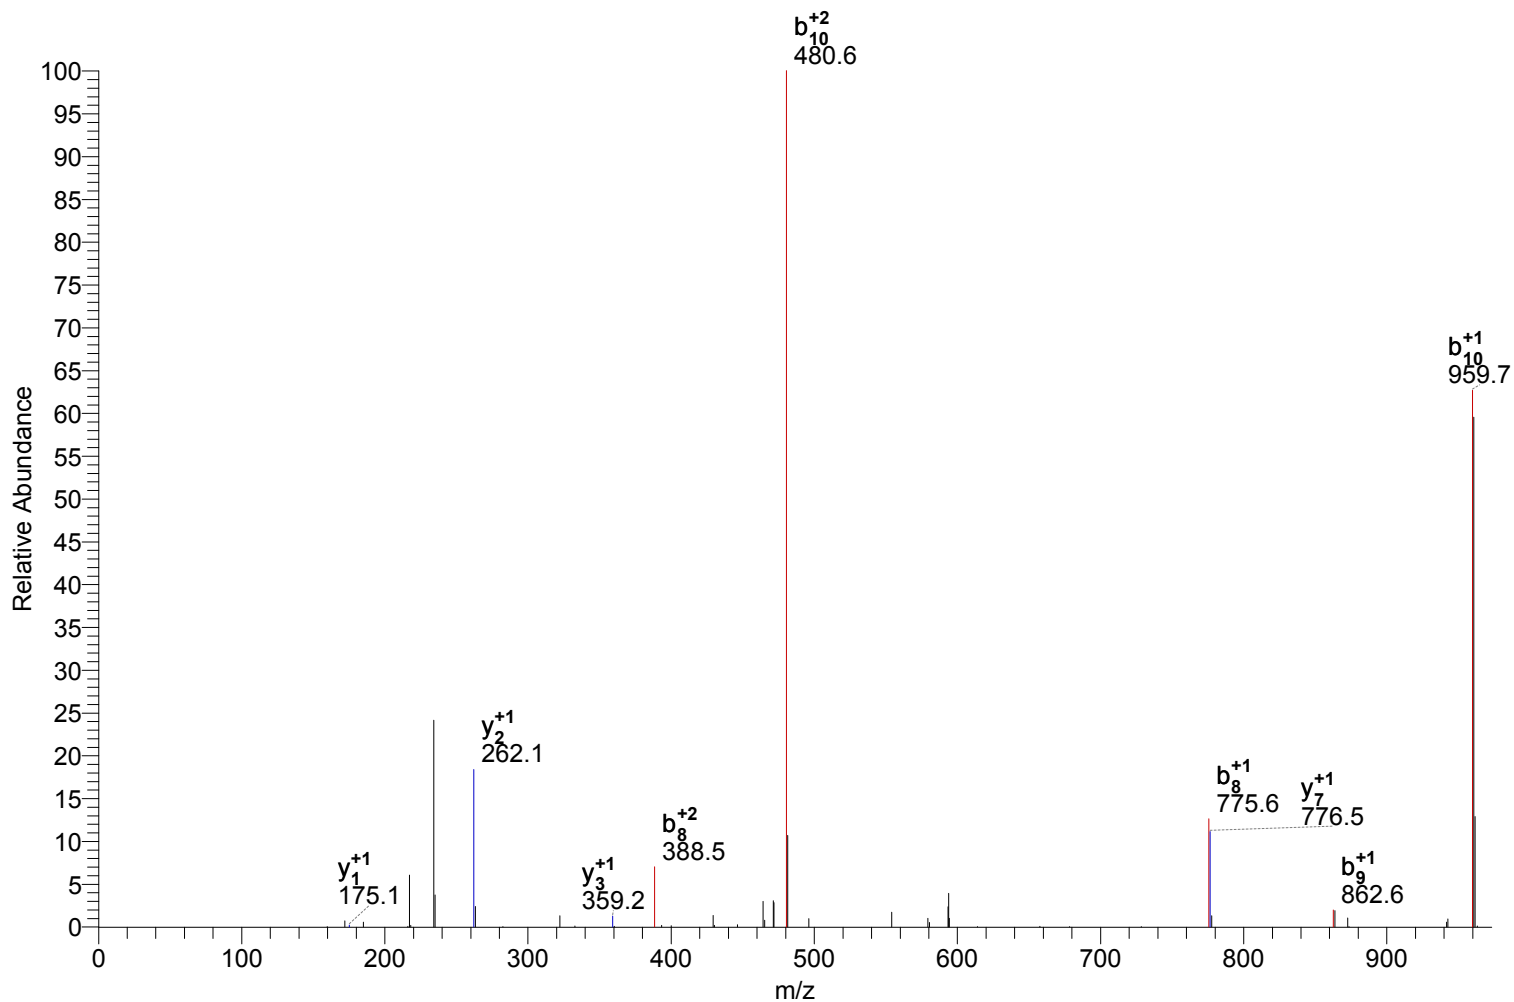



---

| Reference                                                      |          |         |   | P   | Score | Coverage | Accession |     |      |       |
|----------------------------------------------------------------|----------|---------|---|-----|-------|----------|-----------|-----|------|-------|
| Scan(s)                                                        | Sequence | MH+     | z | P   | XC    | DeltaCn  | Sp        | RSp | Ions | Count |
| IPI:IPI00016604.1 SWISS-PROT:Q07343-1 TREMBL:Q5TEK6 ENSEMBL:EN |          |         |   | 1   | 8.1   | 0.0      | 0         |     |      |       |
| 19682592 - 21 R.VNPQEESYQK.L                                   |          | 1221.57 | 2 | 0.8 | 1.486 | 0.615    | 103.8     | 3   | 9/27 | 1     |

---

1 of 1 peptide matches reported, 0 removed due to filtering

DTA for scans: 19682592-2147340288  
Precursor ion: 611.29  
Mass type: mono  
Mod's: (M\* +15.99492) C=161.01468

Ion series for charge: +1

| AA | A ions         | B ions        | B* ions | Bo ions | C ions | Y ions        | Y* ions | Yo ions | Z ions |
|----|----------------|---------------|---------|---------|--------|---------------|---------|---------|--------|
| V  | 72.08          | 100.08        |         |         |        |               |         |         |        |
| N  | 186.12         | 214.12        |         |         |        | 1122.51       |         |         |        |
| P  | 283.18         | 311.17        |         |         |        | 1008.46       |         |         |        |
| Q  | <b>411.24</b>  | <b>439.23</b> |         |         |        | 911.41        |         |         |        |
| E  | <b>540.28</b>  | <b>568.27</b> |         |         |        | <b>783.35</b> |         |         |        |
| E  | 669.32         | 697.32        |         |         |        | <b>654.31</b> |         |         |        |
| S  | 756.35         | <b>784.35</b> |         |         |        | 525.27        |         |         |        |
| Y  | <b>919.42</b>  | 947.41        |         |         |        | 438.23        |         |         |        |
| Q  | <b>1047.47</b> | 1075.47       |         |         |        | 275.17        |         |         |        |
| K  |                |               |         |         |        | 147.11        |         |         |        |

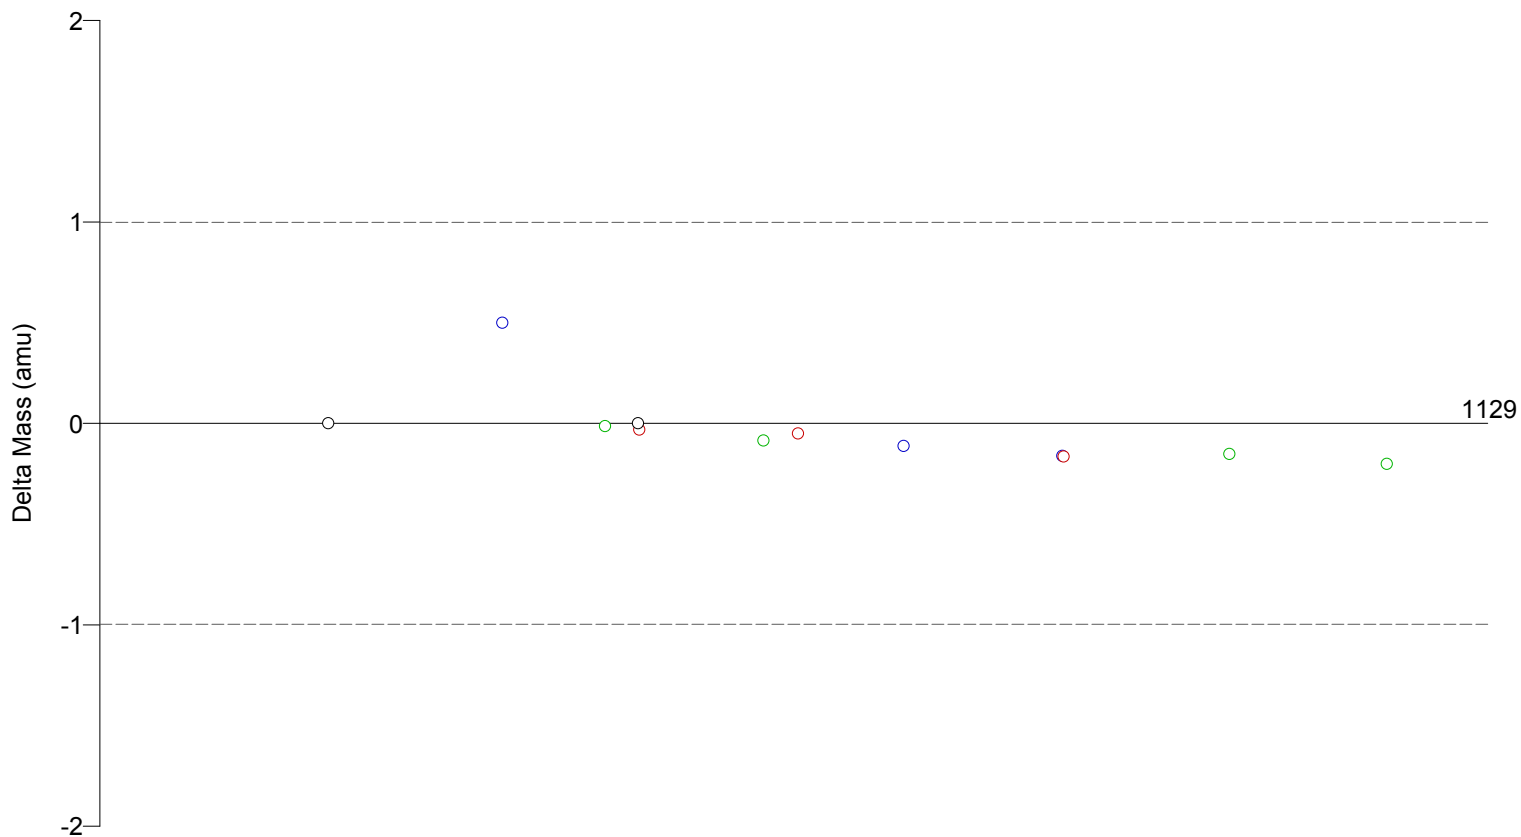

#19682592-2147340288 NL: 8.78E4

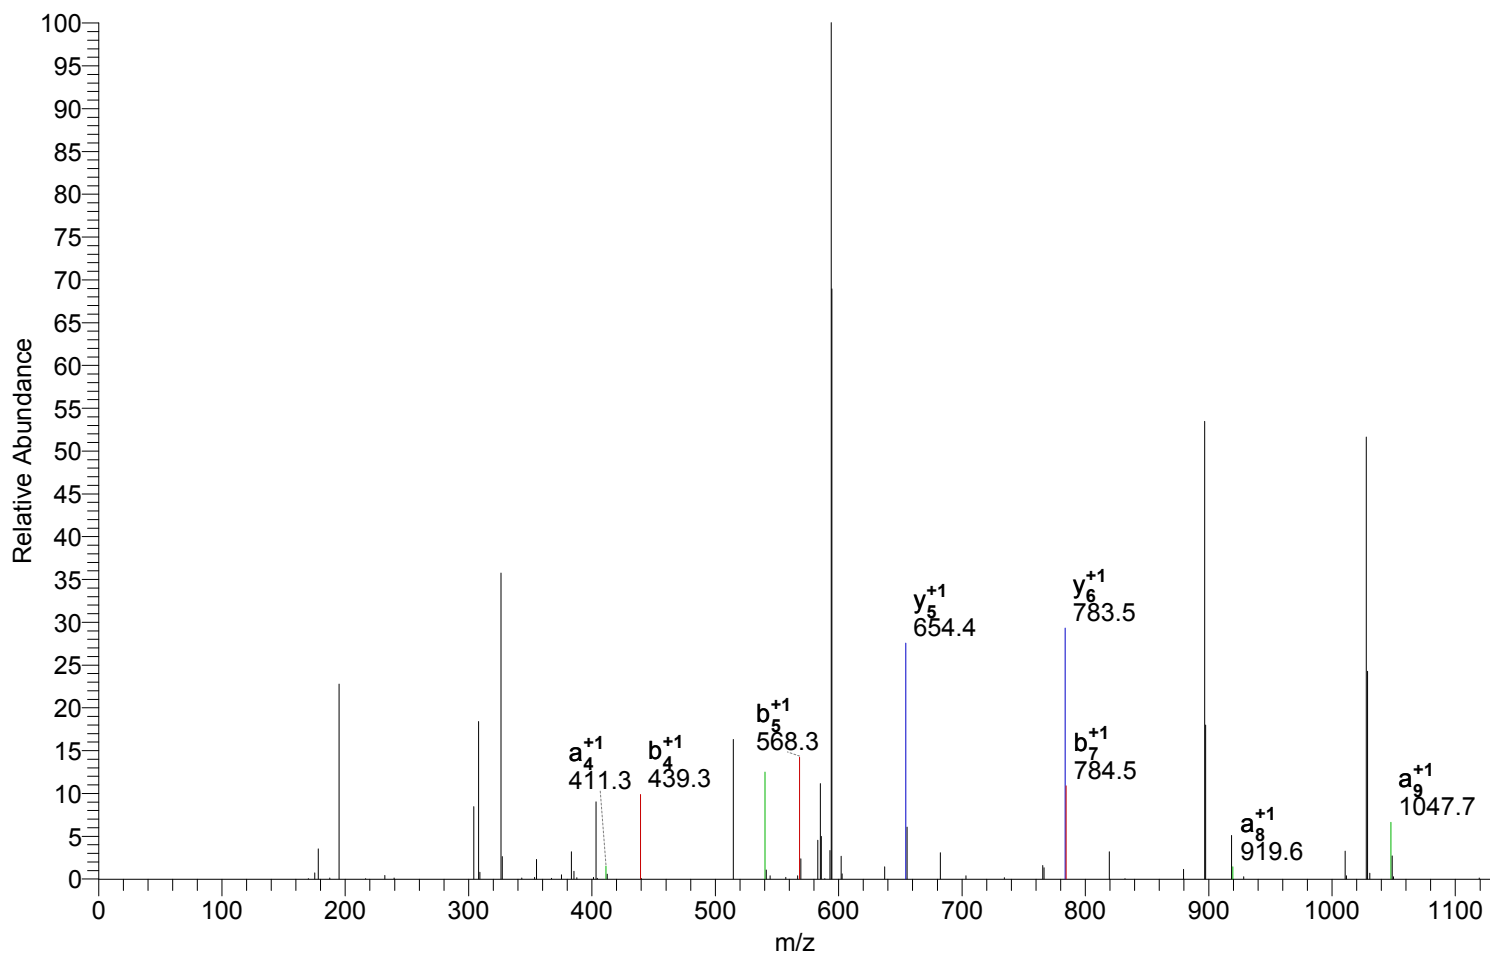

---

| Reference                          |          |         |   | P   | Score | Coverage | Accession |     |      |       |
|------------------------------------|----------|---------|---|-----|-------|----------|-----------|-----|------|-------|
| Scan(s)                            | Sequence | MH+     | z | P   | XC    | DeltaCn  | Sp        | RSp | Ions | Count |
| IPI:IPI00220621.1 SWISS-PROT:Q0734 |          |         |   | 1   | 8.1   | 0.0      | 0         |     |      |       |
| 19682592 - 21 R.VNPQEESYQK.L       |          | 1221.57 | 2 | 0.8 | 1.486 | 0.615    | 103.8     | 3   | 9/27 | 1     |

---

1 of 1 peptide matches reported, 0 removed due to filtering

DTA for scans: 19682592-2147340288  
Precursor ion: 611.29  
Mass type: mono  
Mod's: (M\* +15.99492) C=161.01468

Ion series for charge: +1

| AA | A ions         | B ions        | B* ions | Bo ions | C ions | Y ions        | Y* ions | Yo ions | Z ions |
|----|----------------|---------------|---------|---------|--------|---------------|---------|---------|--------|
| V  | 72.08          | 100.08        |         |         |        |               |         |         |        |
| N  | 186.12         | 214.12        |         |         |        | 1122.51       |         |         |        |
| P  | 283.18         | 311.17        |         |         |        | 1008.46       |         |         |        |
| Q  | <b>411.24</b>  | <b>439.23</b> |         |         |        | 911.41        |         |         |        |
| E  | <b>540.28</b>  | <b>568.27</b> |         |         |        | <b>783.35</b> |         |         |        |
| E  | 669.32         | 697.32        |         |         |        | <b>654.31</b> |         |         |        |
| S  | 756.35         | <b>784.35</b> |         |         |        | 525.27        |         |         |        |
| Y  | <b>919.42</b>  | 947.41        |         |         |        | 438.23        |         |         |        |
| Q  | <b>1047.47</b> | 1075.47       |         |         |        | 275.17        |         |         |        |
| K  |                |               |         |         |        | 147.11        |         |         |        |

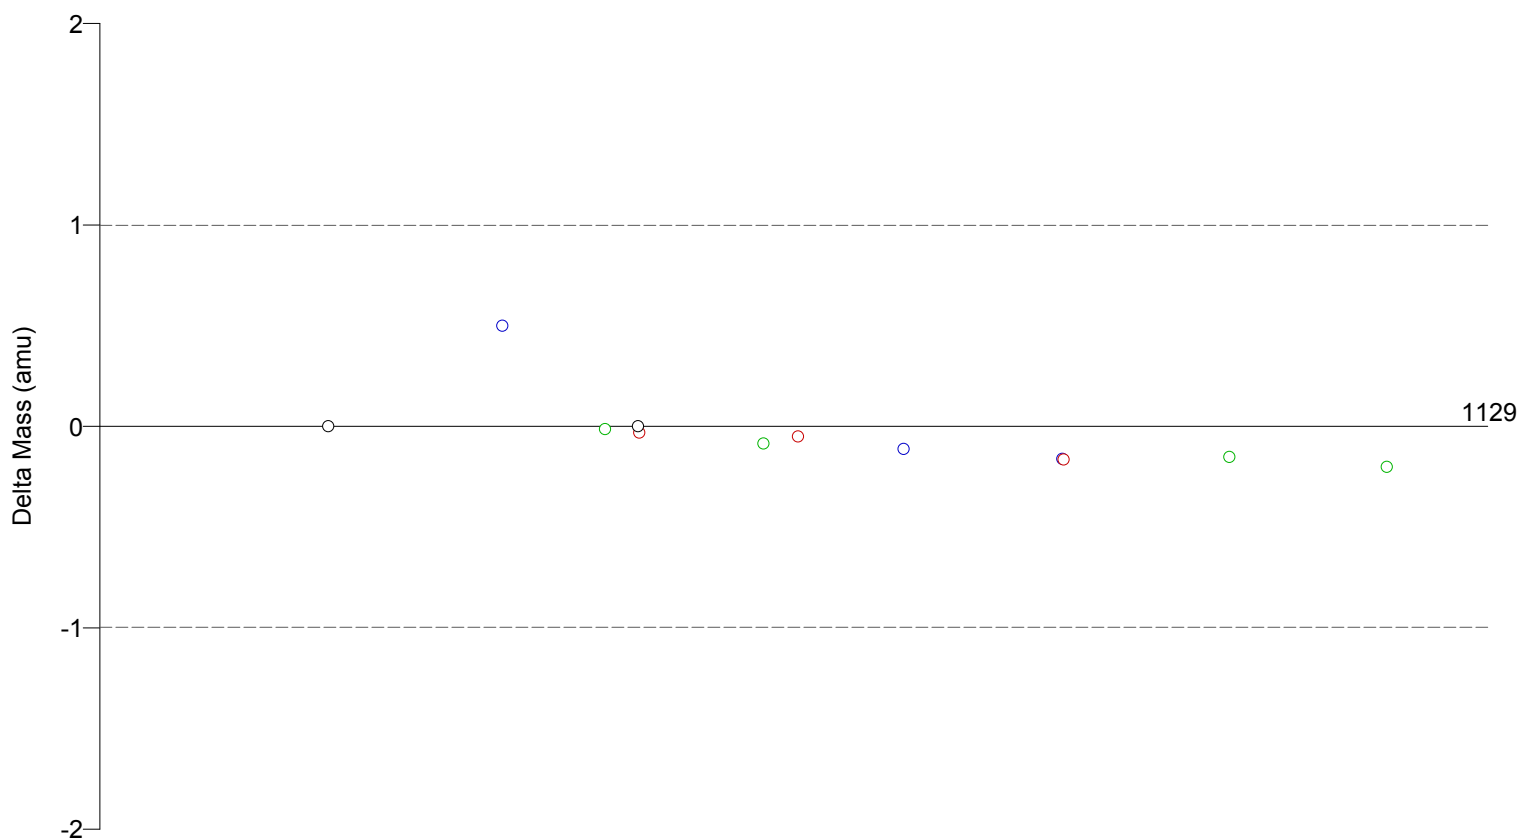

#19682592-2147340288 NL: 8.78E4



---

| Reference                                                     |                       |         |   | P   | Score | Coverage | Accession |     |      |       |
|---------------------------------------------------------------|-----------------------|---------|---|-----|-------|----------|-----------|-----|------|-------|
| Scan(s)                                                       | Sequence              | MH+     | z | P   | XC    | DeltaCn  | Sp        | RSp | Ions | Count |
| IPI:IPI00329088.4 SWISS-PROT:Q86WJ1-1 ENSEMBL:ENSP00000358262 |                       |         |   | 1   | 8.1   | 0.0      | 0         |     |      |       |
| 19287468 - 1                                                  | K.AILM*KDLDAFENETAK.K | 1824.90 | 2 | 0.6 | 1.353 | 0.548    | 73.7      | 15  | 7/45 | 5     |

---

1 of 1 peptide matches reported, 0 removed due to filtering

DTA for scans: 19287468-1  
Precursor ion: 912.95  
Mass type: mono  
Mod's: (M\* +15.99492) C=161.01468

Ion series for charge: +1

| AA | A ions  | B ions        | B* ions | Bo ions | C ions | Y ions         | Y* ions | Yo ions | Z ions |
|----|---------|---------------|---------|---------|--------|----------------|---------|---------|--------|
| A  | 44.05   | 72.04         |         |         |        |                |         |         |        |
| I  | 157.13  | 185.13        |         |         |        | 1753.87        |         |         |        |
| L  | 270.22  | <b>298.21</b> |         |         |        | 1640.78        |         |         |        |
| M* | 417.25  | 445.25        |         |         |        | 1527.70        |         |         |        |
| K  | 545.35  | <b>573.34</b> |         |         |        | 1380.66        |         |         |        |
| D  | 660.37  | <b>688.37</b> |         |         |        | <b>1252.57</b> |         |         |        |
| L  | 773.46  | <b>801.45</b> |         |         |        | <b>1137.54</b> |         |         |        |
| D  | 888.49  | 916.48        |         |         |        | <b>1024.46</b> |         |         |        |
| A  | 959.52  | 987.52        |         |         |        | 909.43         |         |         |        |
| F  | 1106.59 | 1134.59       |         |         |        | 838.39         |         |         |        |
| E  | 1235.63 | 1263.63       |         |         |        | 691.33         |         |         |        |
| N  | 1349.68 | 1377.67       |         |         |        | 562.28         |         |         |        |
| E  | 1478.72 | 1506.71       |         |         |        | 448.24         |         |         |        |
| T  | 1579.77 | 1607.76       |         |         |        | 319.20         |         |         |        |
| A  | 1650.80 | 1678.80       |         |         |        | 218.15         |         |         |        |
| K  |         |               |         |         |        | 147.11         |         |         |        |



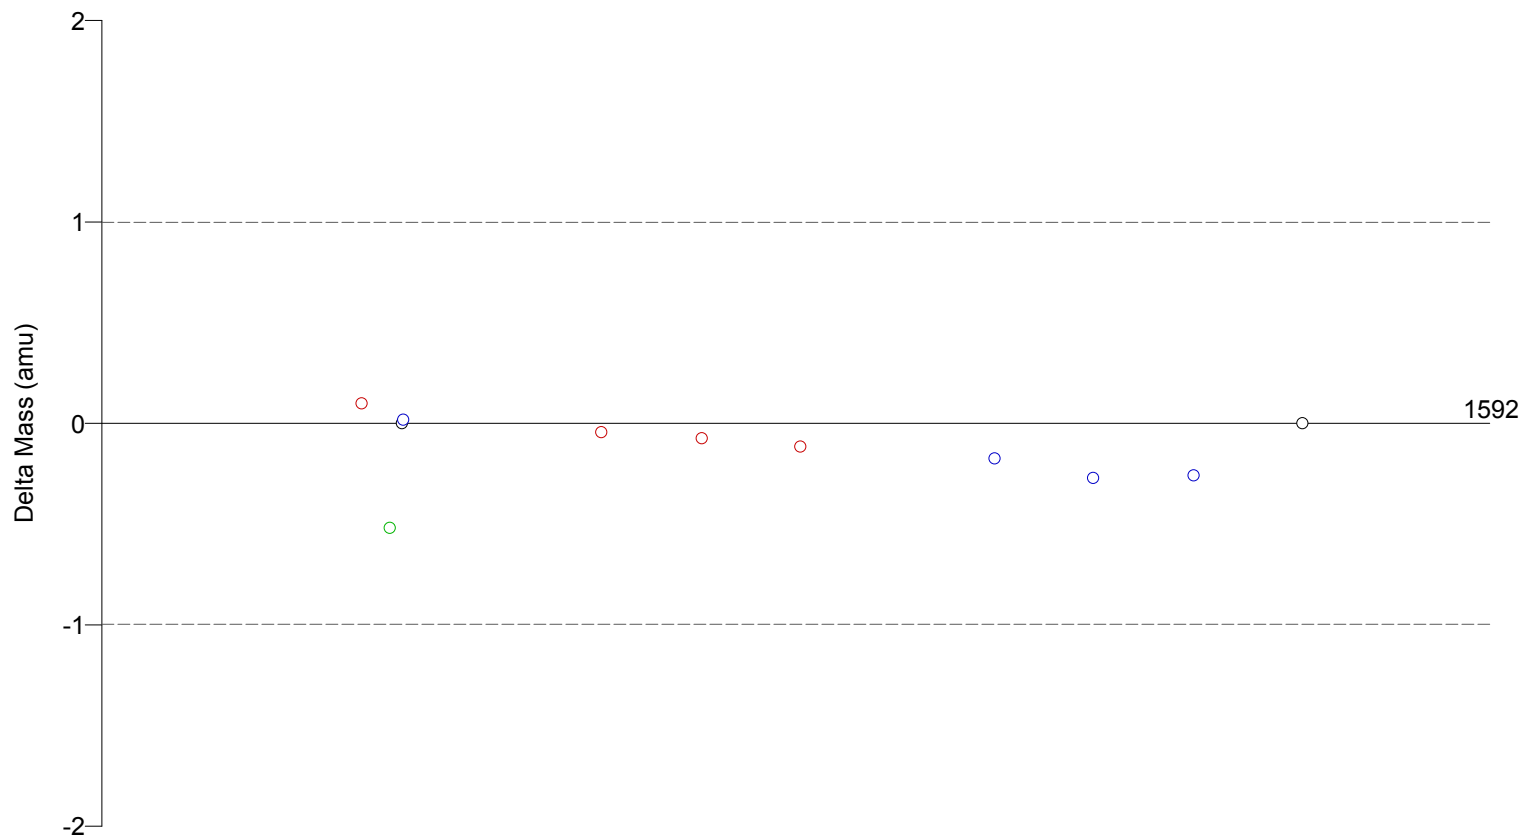

#19287468-1 NL: 3.64E4

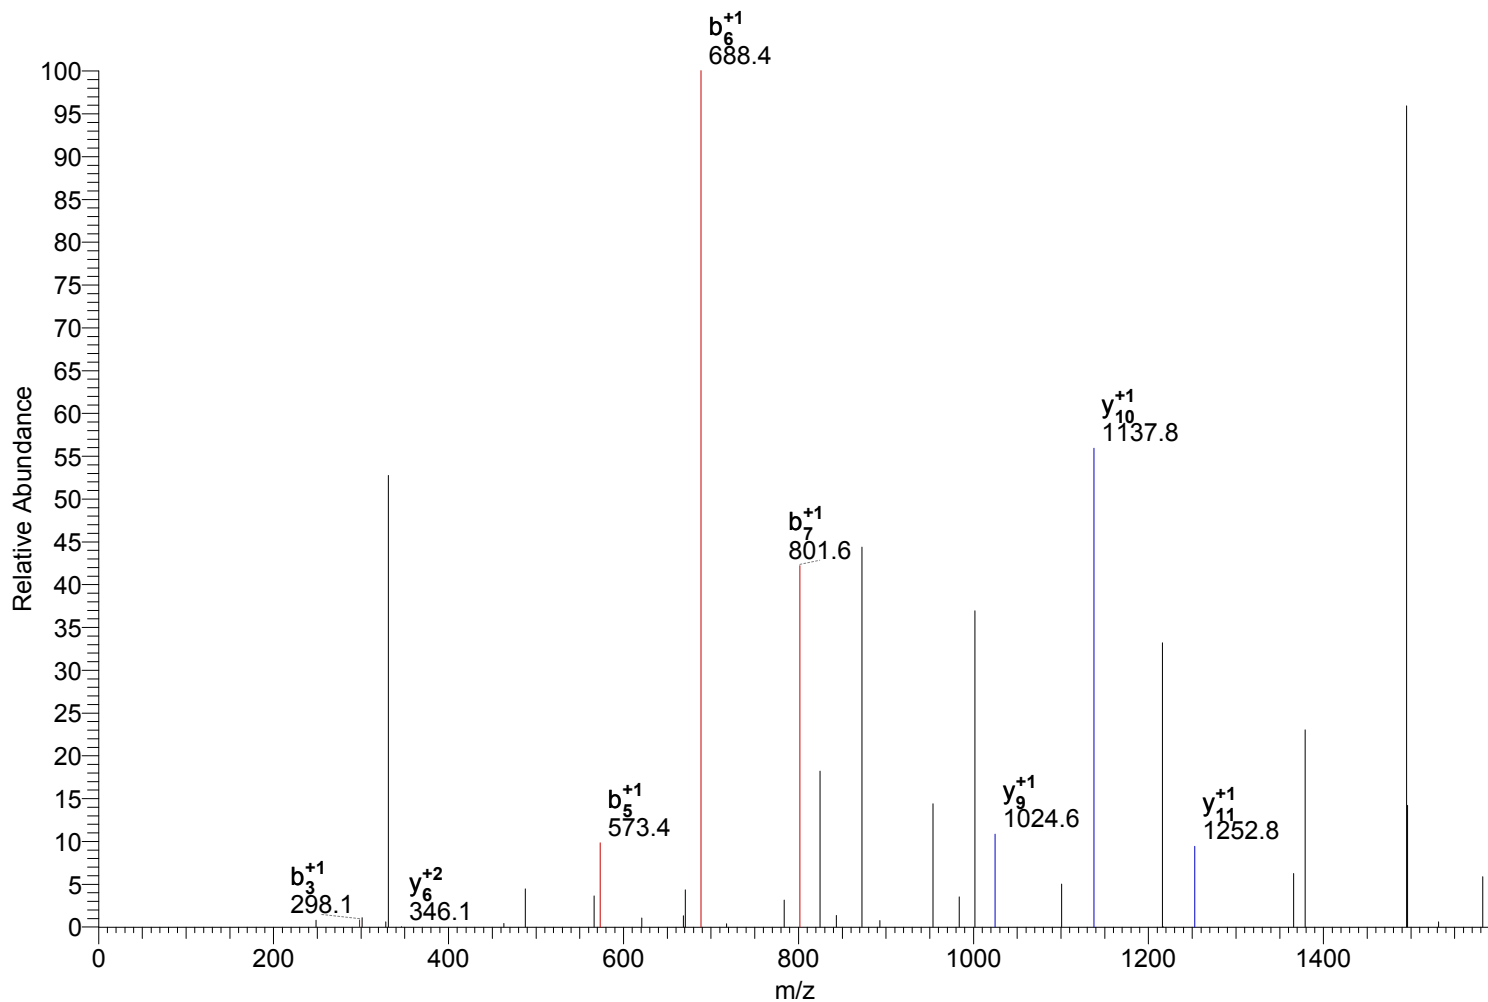

---

| Reference                          |                       |         |   | P   | Score | Coverage | Accession |     |      |       |
|------------------------------------|-----------------------|---------|---|-----|-------|----------|-----------|-----|------|-------|
| Scan(s)                            | Sequence              | MH+     | z | P   | XC    | DeltaCn  | Sp        | RSp | Ions | Count |
| IPI:IPI00400835.6 TREMBL:B5MDZ7 EN |                       |         |   | 1   | 8.1   | 0.0      | 0         |     |      |       |
| 19287468 - 1                       | K.AILM*KDLDAFENETAK.K | 1824.90 | 2 | 0.6 | 1.353 | 0.548    | 73.7      | 15  | 7/45 | 5     |

---

1 of 1 peptide matches reported, 0 removed due to filtering

DTA for scans: 19287468-1  
Precursor ion: 912.95  
Mass type: mono  
Mod's: (M\* +15.99492) C=161.01468

Ion series for charge: +1

| AA | A ions  | B ions        | B* ions | Bo ions | C ions | Y ions         | Y* ions | Yo ions | Z ions |
|----|---------|---------------|---------|---------|--------|----------------|---------|---------|--------|
| A  | 44.05   | 72.04         |         |         |        |                |         |         |        |
| I  | 157.13  | 185.13        |         |         |        | 1753.87        |         |         |        |
| L  | 270.22  | <b>298.21</b> |         |         |        | 1640.78        |         |         |        |
| M* | 417.25  | 445.25        |         |         |        | 1527.70        |         |         |        |
| K  | 545.35  | <b>573.34</b> |         |         |        | 1380.66        |         |         |        |
| D  | 660.37  | <b>688.37</b> |         |         |        | <b>1252.57</b> |         |         |        |
| L  | 773.46  | <b>801.45</b> |         |         |        | <b>1137.54</b> |         |         |        |
| D  | 888.49  | 916.48        |         |         |        | <b>1024.46</b> |         |         |        |
| A  | 959.52  | 987.52        |         |         |        | 909.43         |         |         |        |
| F  | 1106.59 | 1134.59       |         |         |        | 838.39         |         |         |        |
| E  | 1235.63 | 1263.63       |         |         |        | 691.33         |         |         |        |
| N  | 1349.68 | 1377.67       |         |         |        | 562.28         |         |         |        |
| E  | 1478.72 | 1506.71       |         |         |        | 448.24         |         |         |        |
| T  | 1579.77 | 1607.76       |         |         |        | 319.20         |         |         |        |
| A  | 1650.80 | 1678.80       |         |         |        | 218.15         |         |         |        |
| K  |         |               |         |         |        | 147.11         |         |         |        |



#19287468-1 NL: 3.64E4



---

| Reference                          |                       |         |   | P   | Score | Coverage | Accession |     |      |       |
|------------------------------------|-----------------------|---------|---|-----|-------|----------|-----------|-----|------|-------|
| Scan(s)                            | Sequence              | MH+     | z | P   | XC    | DeltaCn  | Sp        | RSp | Ions | Count |
| IPI:IPI00854584.1 SWISS-PROT:Q86WJ |                       |         |   | 1   | 8.1   | 0.0      | 0         |     |      |       |
| 19287468 - 1                       | K.AILM*KDLDAFENETAK.K | 1824.90 | 2 | 0.6 | 1.353 | 0.548    | 73.7      | 15  | 7/45 | 5     |

---

1 of 1 peptide matches reported, 0 removed due to filtering

DTA for scans: 19287468-1  
Precursor ion: 912.95  
Mass type: mono  
Mod's: (M\* +15.99492) C=161.01468

Ion series for charge: +1

| AA | A ions  | B ions        | B* ions | Bo ions | C ions | Y ions         | Y* ions | Yo ions | Z ions |
|----|---------|---------------|---------|---------|--------|----------------|---------|---------|--------|
| A  | 44.05   | 72.04         |         |         |        |                |         |         |        |
| I  | 157.13  | 185.13        |         |         |        | 1753.87        |         |         |        |
| L  | 270.22  | <b>298.21</b> |         |         |        | 1640.78        |         |         |        |
| M* | 417.25  | 445.25        |         |         |        | 1527.70        |         |         |        |
| K  | 545.35  | <b>573.34</b> |         |         |        | 1380.66        |         |         |        |
| D  | 660.37  | <b>688.37</b> |         |         |        | <b>1252.57</b> |         |         |        |
| L  | 773.46  | <b>801.45</b> |         |         |        | <b>1137.54</b> |         |         |        |
| D  | 888.49  | 916.48        |         |         |        | <b>1024.46</b> |         |         |        |
| A  | 959.52  | 987.52        |         |         |        | 909.43         |         |         |        |
| F  | 1106.59 | 1134.59       |         |         |        | 838.39         |         |         |        |
| E  | 1235.63 | 1263.63       |         |         |        | 691.33         |         |         |        |
| N  | 1349.68 | 1377.67       |         |         |        | 562.28         |         |         |        |
| E  | 1478.72 | 1506.71       |         |         |        | 448.24         |         |         |        |
| T  | 1579.77 | 1607.76       |         |         |        | 319.20         |         |         |        |
| A  | 1650.80 | 1678.80       |         |         |        | 218.15         |         |         |        |
| K  |         |               |         |         |        | 147.11         |         |         |        |

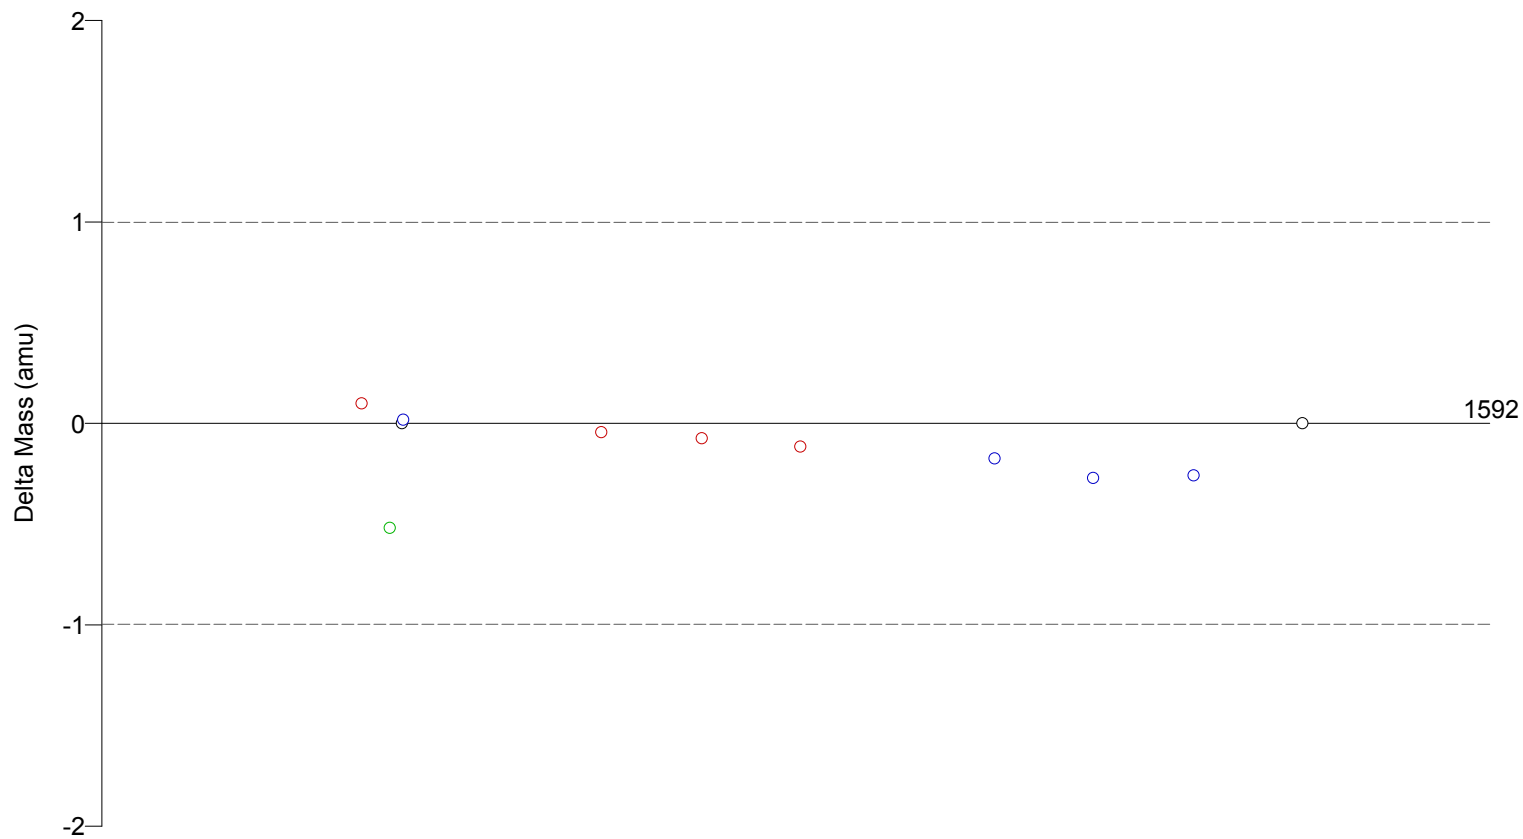

#19287468-1 NL: 3.64E4



---

| Reference                          |                       |         |   | P   | Score | Coverage | Accession |     |      |       |
|------------------------------------|-----------------------|---------|---|-----|-------|----------|-----------|-----|------|-------|
| Scan(s)                            | Sequence              | MH+     | z | P   | XC    | DeltaCn  | Sp        | RSp | Ions | Count |
| IPI:IPI00890729.1 SWISS-PROT:Q86WJ |                       |         |   | 1   | 8.1   | 0.0      | 0         |     |      |       |
| 19287468 - 1                       | K.AILM*KDLDAFENETAK.K | 1824.90 | 2 | 0.6 | 1.353 | 0.548    | 73.7      | 15  | 7/45 | 5     |

---

1 of 1 peptide matches reported, 0 removed due to filtering



DTA for scans: 19287468-1  
Precursor ion: 912.95  
Mass type: mono  
Mod's: (M\* +15.99492) C=161.01468

Ion series for charge: +1

| AA | A ions  | B ions        | B* ions | Bo ions | C ions | Y ions         | Y* ions | Yo ions | Z ions |
|----|---------|---------------|---------|---------|--------|----------------|---------|---------|--------|
| A  | 44.05   | 72.04         |         |         |        |                |         |         |        |
| I  | 157.13  | 185.13        |         |         |        | 1753.87        |         |         |        |
| L  | 270.22  | <b>298.21</b> |         |         |        | 1640.78        |         |         |        |
| M* | 417.25  | 445.25        |         |         |        | 1527.70        |         |         |        |
| K  | 545.35  | <b>573.34</b> |         |         |        | 1380.66        |         |         |        |
| D  | 660.37  | <b>688.37</b> |         |         |        | <b>1252.57</b> |         |         |        |
| L  | 773.46  | <b>801.45</b> |         |         |        | <b>1137.54</b> |         |         |        |
| D  | 888.49  | 916.48        |         |         |        | <b>1024.46</b> |         |         |        |
| A  | 959.52  | 987.52        |         |         |        | 909.43         |         |         |        |
| F  | 1106.59 | 1134.59       |         |         |        | 838.39         |         |         |        |
| E  | 1235.63 | 1263.63       |         |         |        | 691.33         |         |         |        |
| N  | 1349.68 | 1377.67       |         |         |        | 562.28         |         |         |        |
| E  | 1478.72 | 1506.71       |         |         |        | 448.24         |         |         |        |
| T  | 1579.77 | 1607.76       |         |         |        | 319.20         |         |         |        |
| A  | 1650.80 | 1678.80       |         |         |        | 218.15         |         |         |        |
| K  |         |               |         |         |        | 147.11         |         |         |        |

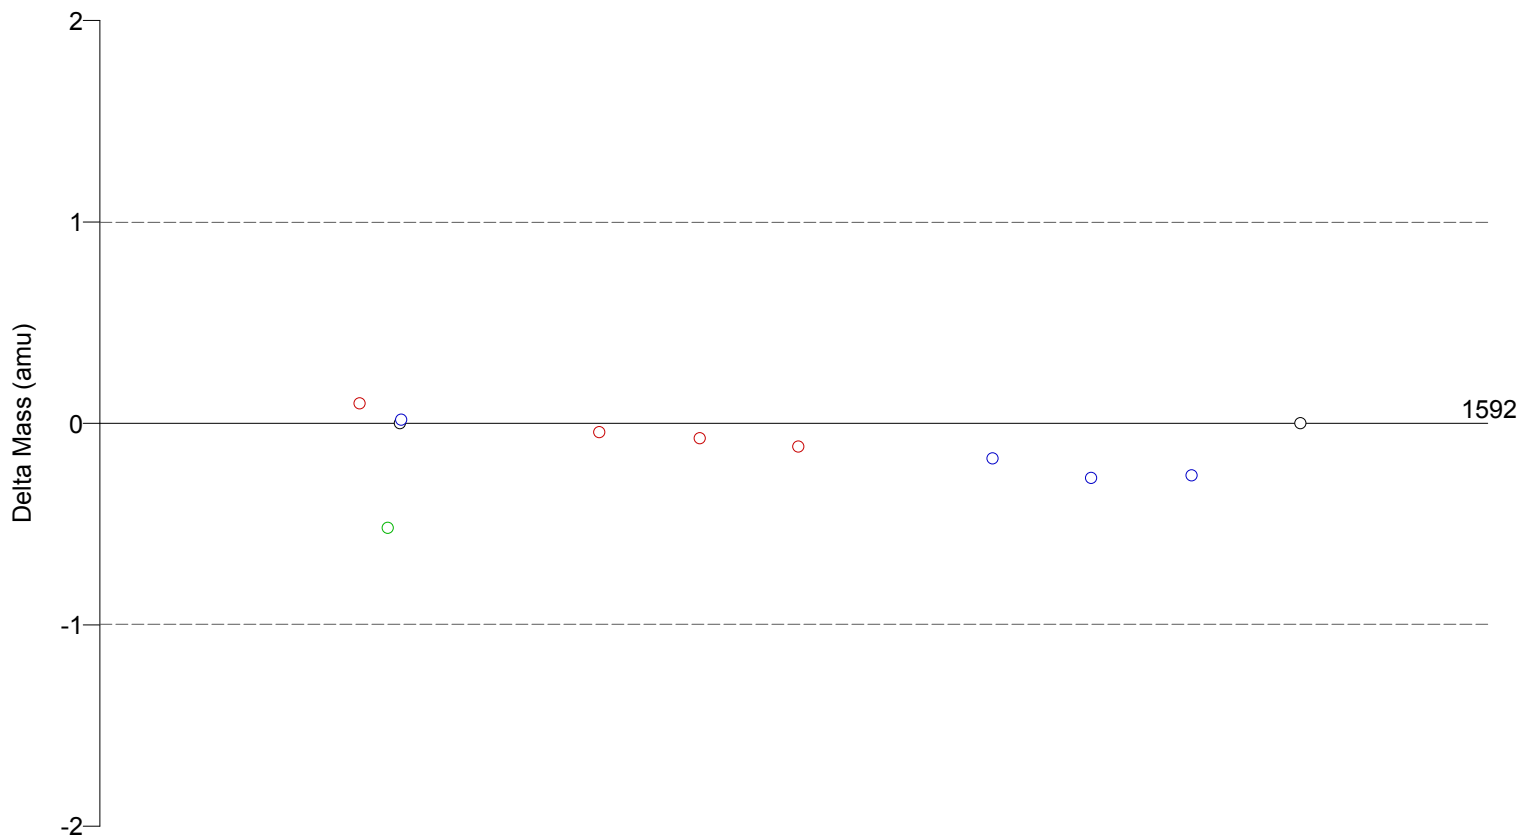

#19287468-1 NL: 3.64E4



---

| Reference                          |                       |         |   | P   | Score | Coverage | Accession |     |      |       |
|------------------------------------|-----------------------|---------|---|-----|-------|----------|-----------|-----|------|-------|
| Scan(s)                            | Sequence              | MH+     | z | P   | XC    | DeltaCn  | Sp        | RSp | Ions | Count |
| IPI:IPI00890749.1 SWISS-PROT:Q86WJ |                       |         |   | 1   | 8.1   | 0.0      | 0         |     |      |       |
| 19287468 - 1                       | K.AILM*KDLDAFENETAK.K | 1824.90 | 2 | 0.6 | 1.353 | 0.548    | 73.7      | 15  | 7/45 | 5     |

---

1 of 1 peptide matches reported, 0 removed due to filtering

DTA for scans: 19287468-1  
Precursor ion: 912.95  
Mass type: mono  
Mod's: (M\* +15.99492) C=161.01468

Ion series for charge: +1

| AA | A ions  | B ions        | B* ions | Bo ions | C ions | Y ions         | Y* ions | Yo ions | Z ions |
|----|---------|---------------|---------|---------|--------|----------------|---------|---------|--------|
| A  | 44.05   | 72.04         |         |         |        |                |         |         |        |
| I  | 157.13  | 185.13        |         |         |        | 1753.87        |         |         |        |
| L  | 270.22  | <b>298.21</b> |         |         |        | 1640.78        |         |         |        |
| M* | 417.25  | 445.25        |         |         |        | 1527.70        |         |         |        |
| K  | 545.35  | <b>573.34</b> |         |         |        | 1380.66        |         |         |        |
| D  | 660.37  | <b>688.37</b> |         |         |        | <b>1252.57</b> |         |         |        |
| L  | 773.46  | <b>801.45</b> |         |         |        | <b>1137.54</b> |         |         |        |
| D  | 888.49  | 916.48        |         |         |        | <b>1024.46</b> |         |         |        |
| A  | 959.52  | 987.52        |         |         |        | 909.43         |         |         |        |
| F  | 1106.59 | 1134.59       |         |         |        | 838.39         |         |         |        |
| E  | 1235.63 | 1263.63       |         |         |        | 691.33         |         |         |        |
| N  | 1349.68 | 1377.67       |         |         |        | 562.28         |         |         |        |
| E  | 1478.72 | 1506.71       |         |         |        | 448.24         |         |         |        |
| T  | 1579.77 | 1607.76       |         |         |        | 319.20         |         |         |        |
| A  | 1650.80 | 1678.80       |         |         |        | 218.15         |         |         |        |
| K  |         |               |         |         |        | 147.11         |         |         |        |



#19287468-1 NL: 3.64E4



---

| Reference                          |                       |         |   | P   | Score | Coverage | Accession |     |      |       |
|------------------------------------|-----------------------|---------|---|-----|-------|----------|-----------|-----|------|-------|
| Scan(s)                            | Sequence              | MH+     | z | P   | XC    | DeltaCn  | Sp        | RSp | Ions | Count |
| IPI:IPI00909123.1 TREMBL:B4DPN5 Ta |                       |         |   | 1   | 8.1   | 0.0      | 0         |     |      |       |
| 19287468 - 1                       | K.AILM*KDLDAFENETAK.K | 1824.90 | 2 | 0.6 | 1.353 | 0.548    | 73.7      | 15  | 7/45 | 5     |

---

1 of 1 peptide matches reported, 0 removed due to filtering

DTA for scans: 19287468-1  
Precursor ion: 912.95  
Mass type: mono  
Mod's: (M\* +15.99492) C=161.01468

Ion series for charge: +1

| AA | A ions  | B ions        | B* ions | Bo ions | C ions | Y ions         | Y* ions | Yo ions | Z ions |
|----|---------|---------------|---------|---------|--------|----------------|---------|---------|--------|
| A  | 44.05   | 72.04         |         |         |        |                |         |         |        |
| I  | 157.13  | 185.13        |         |         |        | 1753.87        |         |         |        |
| L  | 270.22  | <b>298.21</b> |         |         |        | 1640.78        |         |         |        |
| M* | 417.25  | 445.25        |         |         |        | 1527.70        |         |         |        |
| K  | 545.35  | <b>573.34</b> |         |         |        | 1380.66        |         |         |        |
| D  | 660.37  | <b>688.37</b> |         |         |        | <b>1252.57</b> |         |         |        |
| L  | 773.46  | <b>801.45</b> |         |         |        | <b>1137.54</b> |         |         |        |
| D  | 888.49  | 916.48        |         |         |        | <b>1024.46</b> |         |         |        |
| A  | 959.52  | 987.52        |         |         |        | 909.43         |         |         |        |
| F  | 1106.59 | 1134.59       |         |         |        | 838.39         |         |         |        |
| E  | 1235.63 | 1263.63       |         |         |        | 691.33         |         |         |        |
| N  | 1349.68 | 1377.67       |         |         |        | 562.28         |         |         |        |
| E  | 1478.72 | 1506.71       |         |         |        | 448.24         |         |         |        |
| T  | 1579.77 | 1607.76       |         |         |        | 319.20         |         |         |        |
| A  | 1650.80 | 1678.80       |         |         |        | 218.15         |         |         |        |
| K  |         |               |         |         |        | 147.11         |         |         |        |



#19287468-1 NL: 3.64E4

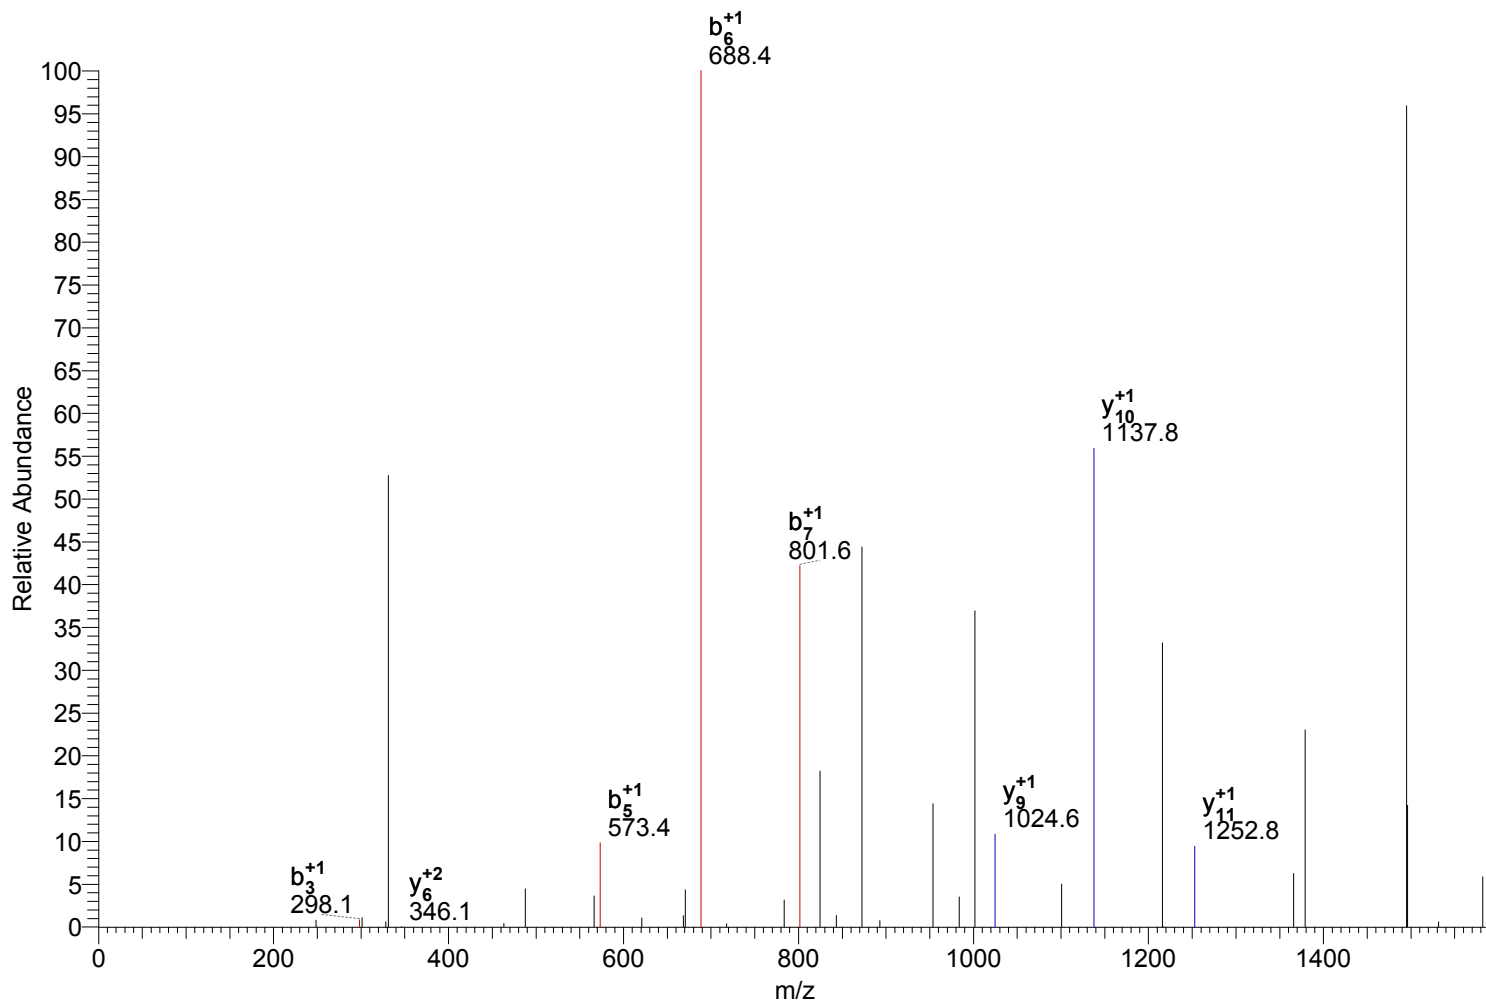



---

| Reference                                                      |                   |         |   | P | Score | Coverage | Accession |     |      |       |
|----------------------------------------------------------------|-------------------|---------|---|---|-------|----------|-----------|-----|------|-------|
| Scan(s)                                                        | Sequence          | MH+     | z | P | XC    | DeltaCn  | Sp        | RSp | Ions | Count |
| IPI:IPI00007775.1 SWISS-PROT:Q9UKT6 TREMBL:Q3KPF8 ENSEMBL:ENSP |                   |         |   | 1 | 8.1   | 0.0      | 0         |     |      |       |
| 19287468 - 1                                                   | K.CEVSCSAFIRFVR.L | 1632.75 | 2 | 1 | 1.324 | 0.637    | 67.0      | 3   | 6/36 |       |

---

1 of 1 peptide matches reported, 0 removed due to filtering

DTA for scans: 19287468-1  
Precursor ion: 816.90  
Mass type: mono  
Mod's: (M\* +15.99492) C=161.01468

Ion series for charge: +1

| AA | A ions  | B ions        | B* ions | Bo ions | C ions | Y ions        | Y* ions | Yo ions | Z ions |
|----|---------|---------------|---------|---------|--------|---------------|---------|---------|--------|
| C  | 134.03  | 162.02        |         |         |        |               |         |         |        |
| E  | 263.07  | 291.06        |         |         |        | 1471.74       |         |         |        |
| V  | 362.14  | 390.13        |         |         |        | 1342.69       |         |         |        |
| S  | 449.17  | <b>477.16</b> |         |         |        | 1243.63       |         |         |        |
| C  | 610.18  | 638.18        |         |         |        | 1156.59       |         |         |        |
| S  | 697.22  | 725.21        |         |         |        | 995.58        |         |         |        |
| A  | 768.25  | <b>796.25</b> |         |         |        | <b>908.55</b> |         |         |        |
| F  | 915.32  | <b>943.32</b> |         |         |        | <b>837.51</b> |         |         |        |
| I  | 1028.41 | 1056.40       |         |         |        | <b>690.44</b> |         |         |        |
| R  | 1184.51 | 1212.50       |         |         |        | 577.36        |         |         |        |
| F  | 1331.58 | 1359.57       |         |         |        | 421.26        |         |         |        |
| V  | 1430.64 | 1458.64       |         |         |        | 274.19        |         |         |        |
| R  |         |               |         |         |        | 175.12        |         |         |        |

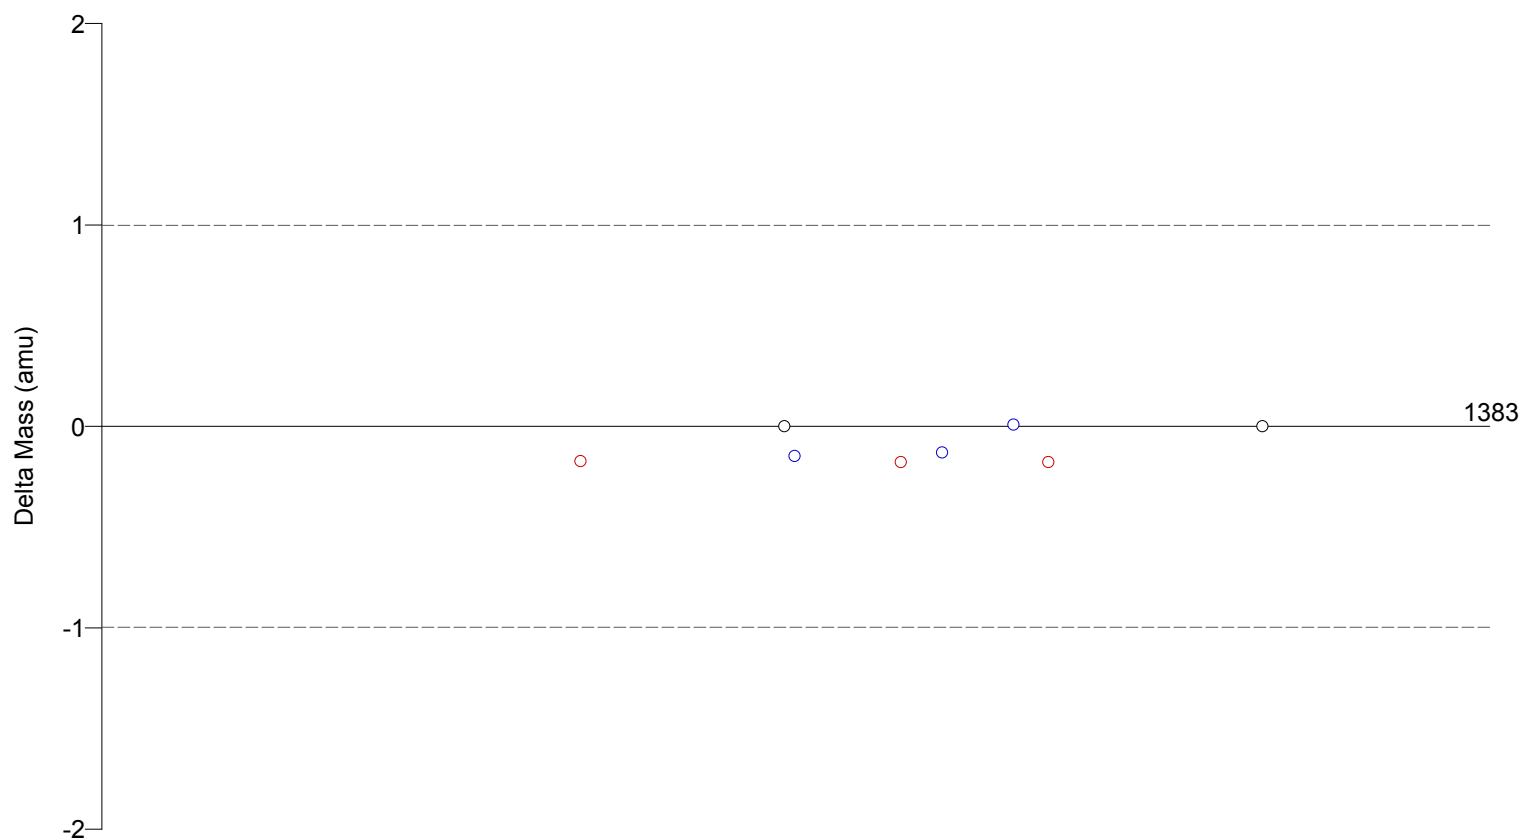

#19287468-1 NL: 6.55E4

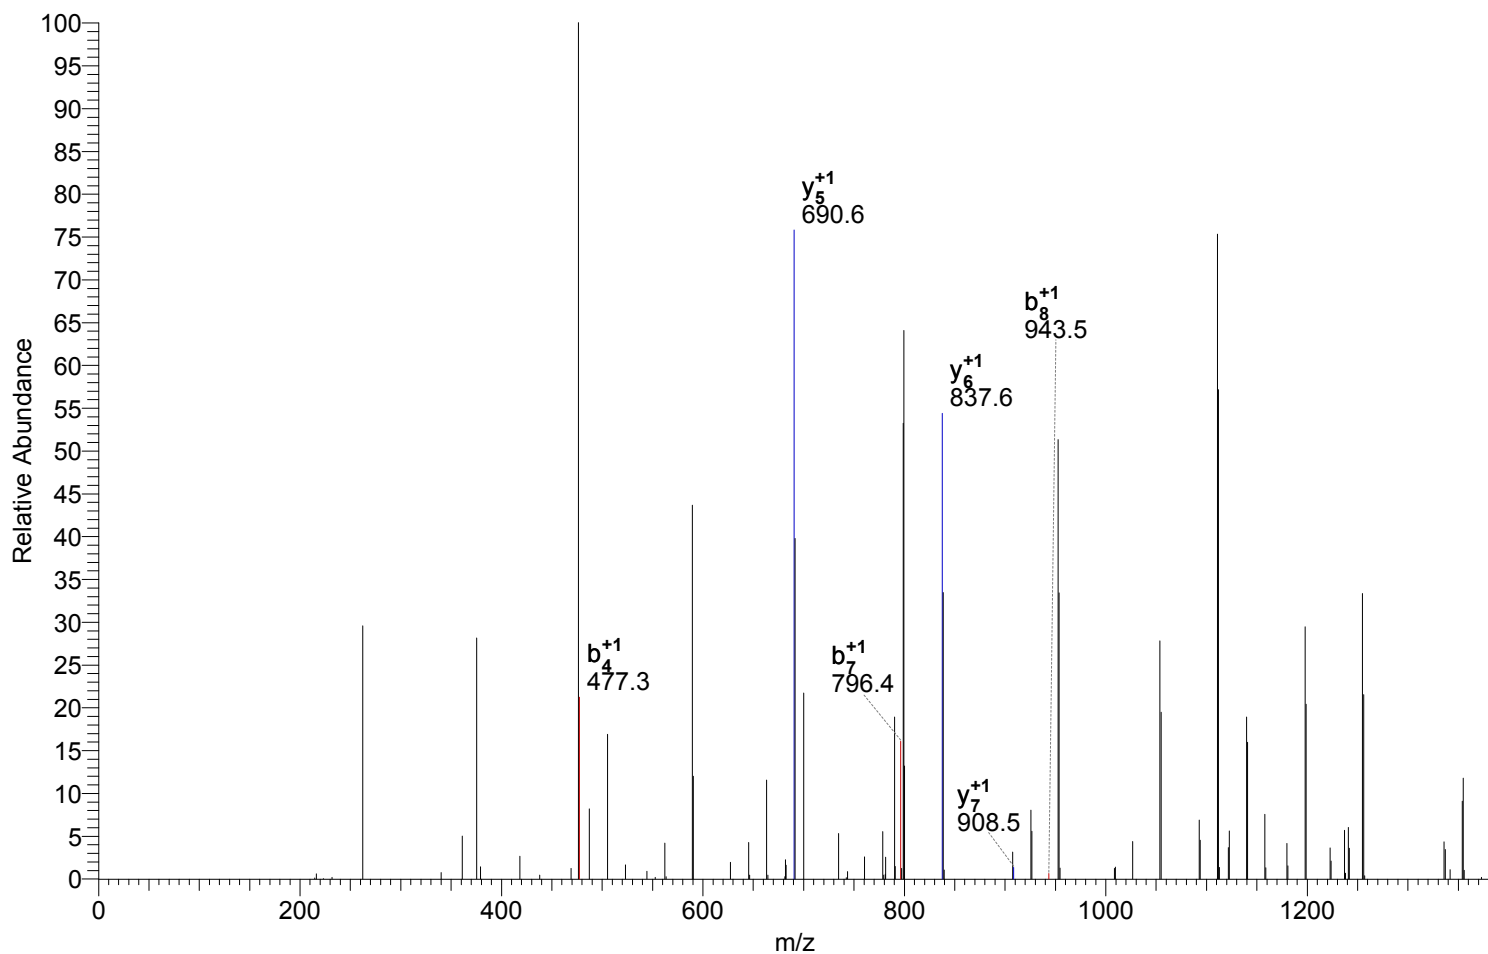

---

| Reference                                                      |          |         |   | P   | Score | Coverage | Accession |     |      |       |
|----------------------------------------------------------------|----------|---------|---|-----|-------|----------|-----------|-----|------|-------|
| Scan(s)                                                        | Sequence | MH+     | z | P   | XC    | DeltaCn  | Sp        | RSp | Ions | Count |
| IPI:IPI00003519.1 SWISS-PROT:Q15029 TREMBL:A8KAP3;B3KX19;B4DMC |          |         |   | 1   | 8.1   | 0.0      | 0         |     |      |       |
| 2118291816 - K.RLWGDIYFNPK.T                                   |          | 1408.74 | 2 | 0.6 | 1.270 | 0.699    | 132.3     | 2   | 8/30 | 2     |

---

1 of 1 peptide matches reported, 0 removed due to filtering

DTA for scans: 2118291816-26226248  
Precursor ion: 704.87  
Mass type: mono  
Mod's: (M\* +15.99492) C=161.01468

Ion series for charge: +1

| AA | A ions        | B ions        | B* ions | Bo ions | C ions | Y ions        | Y* ions | Yo ions | Z ions |
|----|---------------|---------------|---------|---------|--------|---------------|---------|---------|--------|
| R  | 129.11        | 157.11        |         |         |        |               |         |         |        |
| L  | 242.20        | 270.19        |         |         |        | 1252.64       |         |         |        |
| W  | 428.28        | <b>456.27</b> |         |         |        | 1139.55       |         |         |        |
| G  | 485.30        | 513.29        |         |         |        | 953.47        |         |         |        |
| D  | <b>600.33</b> | <b>628.32</b> |         |         |        | 896.45        |         |         |        |
| I  | 713.41        | <b>741.40</b> |         |         |        | <b>781.42</b> |         |         |        |
| Y  | 876.47        | 904.47        |         |         |        | <b>668.34</b> |         |         |        |
| F  | 1023.54       | 1051.54       |         |         |        | <b>505.28</b> |         |         |        |
| N  | 1137.58       | 1165.58       |         |         |        | 358.21        |         |         |        |
| P  | 1234.64       | 1262.63       |         |         |        | 244.17        |         |         |        |
| K  |               |               |         |         |        | 147.11        |         |         |        |

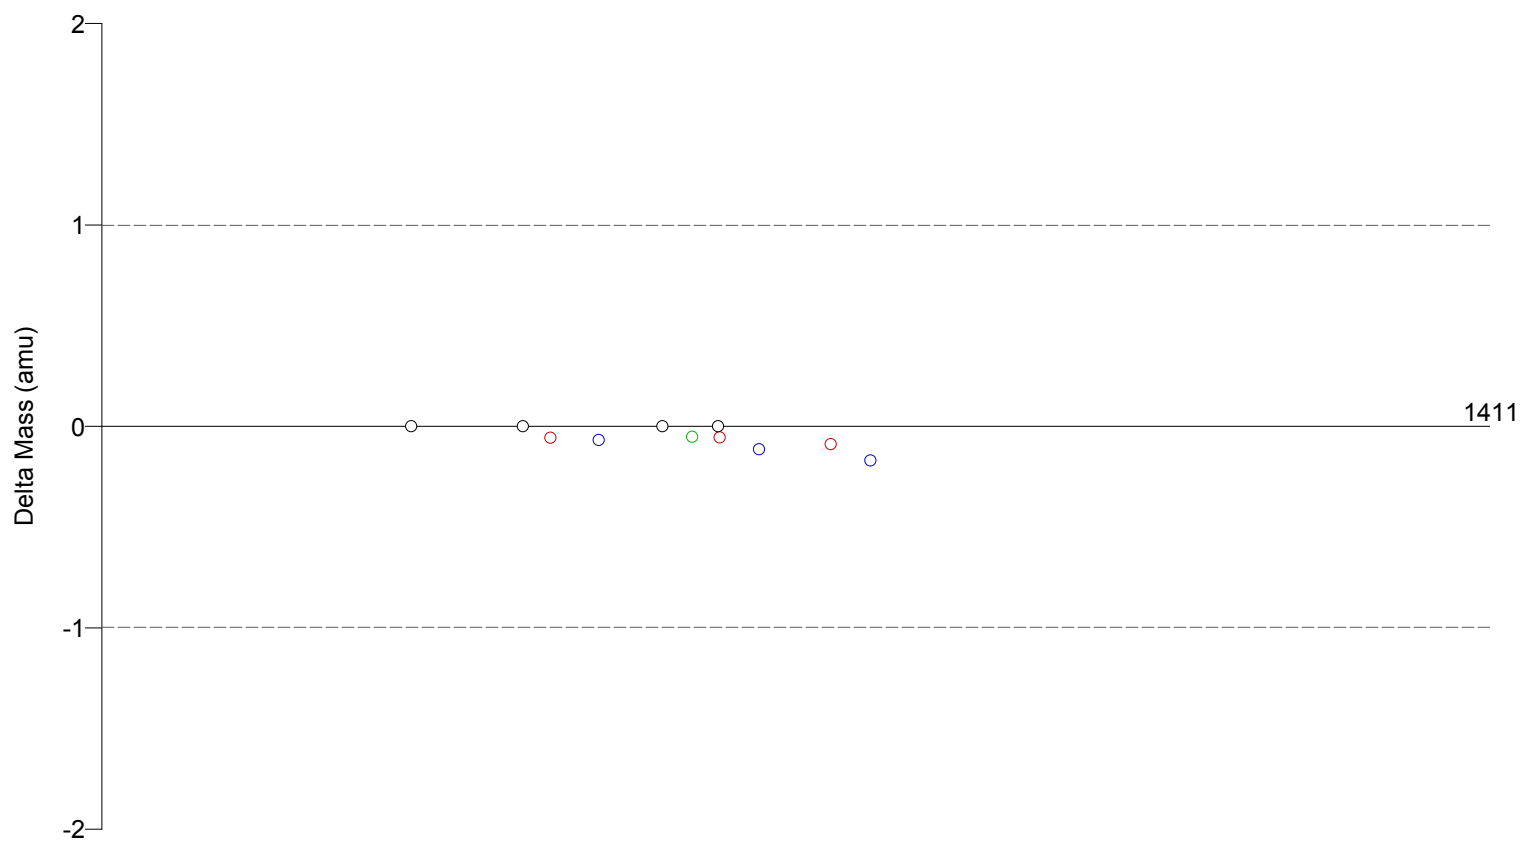

#2118291816-26226248 NL: 1.49E5

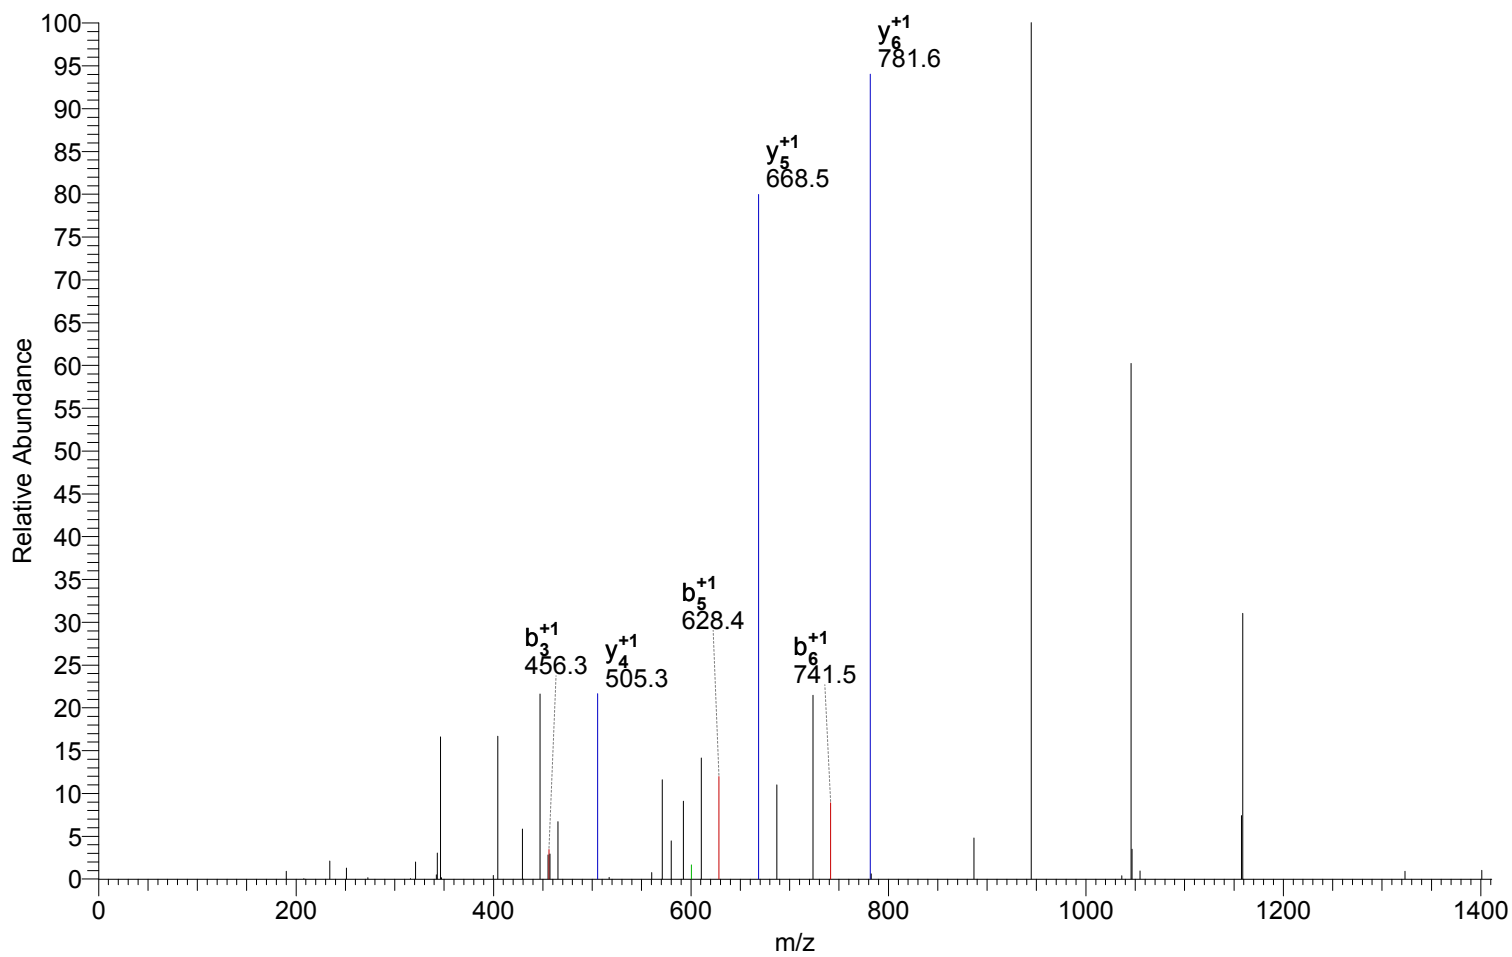

---

| Reference                          |          |         |   | P   | Score | Coverage | Accession |     |      |       |
|------------------------------------|----------|---------|---|-----|-------|----------|-----------|-----|------|-------|
| Scan(s)                            | Sequence | MH+     | z | P   | XC    | DeltaCn  | Sp        | RSp | Ions | Count |
| IPI:IPI00903143.1 TREMBL:B3KQY2 Ta |          |         |   | 1   | 8.1   | 0.0      | 0         |     |      |       |
| 2118291816 - K.RLWGDIYFNPK.T       |          | 1408.74 | 2 | 0.6 | 1.270 | 0.699    | 132.3     | 2   | 8/30 | 2     |

---

1 of 1 peptide matches reported, 0 removed due to filtering

DTA for scans: 2118291816-26226248  
Precursor ion: 704.87  
Mass type: mono  
Mod's: (M\* +15.99492) C=161.01468

Ion series for charge: +1

| AA | A ions        | B ions        | B* ions | Bo ions | C ions | Y ions        | Y* ions | Yo ions | Z ions |
|----|---------------|---------------|---------|---------|--------|---------------|---------|---------|--------|
| R  | 129.11        | 157.11        |         |         |        |               |         |         |        |
| L  | 242.20        | 270.19        |         |         |        | 1252.64       |         |         |        |
| W  | 428.28        | <b>456.27</b> |         |         |        | 1139.55       |         |         |        |
| G  | 485.30        | 513.29        |         |         |        | 953.47        |         |         |        |
| D  | <b>600.33</b> | <b>628.32</b> |         |         |        | 896.45        |         |         |        |
| I  | 713.41        | <b>741.40</b> |         |         |        | <b>781.42</b> |         |         |        |
| Y  | 876.47        | 904.47        |         |         |        | <b>668.34</b> |         |         |        |
| F  | 1023.54       | 1051.54       |         |         |        | <b>505.28</b> |         |         |        |
| N  | 1137.58       | 1165.58       |         |         |        | 358.21        |         |         |        |
| P  | 1234.64       | 1262.63       |         |         |        | 244.17        |         |         |        |
| K  |               |               |         |         |        | 147.11        |         |         |        |





#2118291816-26226248 NL: 1.49E5



---

| Reference                          |          |         |   | P   | Score | Coverage | Accession |     |      |       |
|------------------------------------|----------|---------|---|-----|-------|----------|-----------|-----|------|-------|
| Scan(s)                            | Sequence | MH+     | z | P   | XC    | DeltaCn  | Sp        | RSp | Ions | Count |
| IPI:IPI00917777.1 TREMBL:B4DK30;B4 |          |         |   | 1   | 8.1   | 0.0      | 0         |     |      |       |
| 2118291816 - K.RLWGDIYFNP.K        |          | 1408.74 | 2 | 0.6 | 1.270 | 0.699    | 132.3     | 2   | 8/30 | 2     |

---

1 of 1 peptide matches reported, 0 removed due to filtering

DTA for scans: 2118291816-26226248  
Precursor ion: 704.87  
Mass type: mono  
Mod's: (M\* +15.99492) C=161.01468

Ion series for charge: +1

| AA | A ions        | B ions        | B* ions | Bo ions | C ions | Y ions        | Y* ions | Yo ions | Z ions |
|----|---------------|---------------|---------|---------|--------|---------------|---------|---------|--------|
| R  | 129.11        | 157.11        |         |         |        |               |         |         |        |
| L  | 242.20        | 270.19        |         |         |        | 1252.64       |         |         |        |
| W  | 428.28        | <b>456.27</b> |         |         |        | 1139.55       |         |         |        |
| G  | 485.30        | 513.29        |         |         |        | 953.47        |         |         |        |
| D  | <b>600.33</b> | <b>628.32</b> |         |         |        | 896.45        |         |         |        |
| I  | 713.41        | <b>741.40</b> |         |         |        | <b>781.42</b> |         |         |        |
| Y  | 876.47        | 904.47        |         |         |        | <b>668.34</b> |         |         |        |
| F  | 1023.54       | 1051.54       |         |         |        | <b>505.28</b> |         |         |        |
| N  | 1137.58       | 1165.58       |         |         |        | 358.21        |         |         |        |
| P  | 1234.64       | 1262.63       |         |         |        | 244.17        |         |         |        |
| K  |               |               |         |         |        | 147.11        |         |         |        |



#2118291816-26226248 NL: 1.49E5

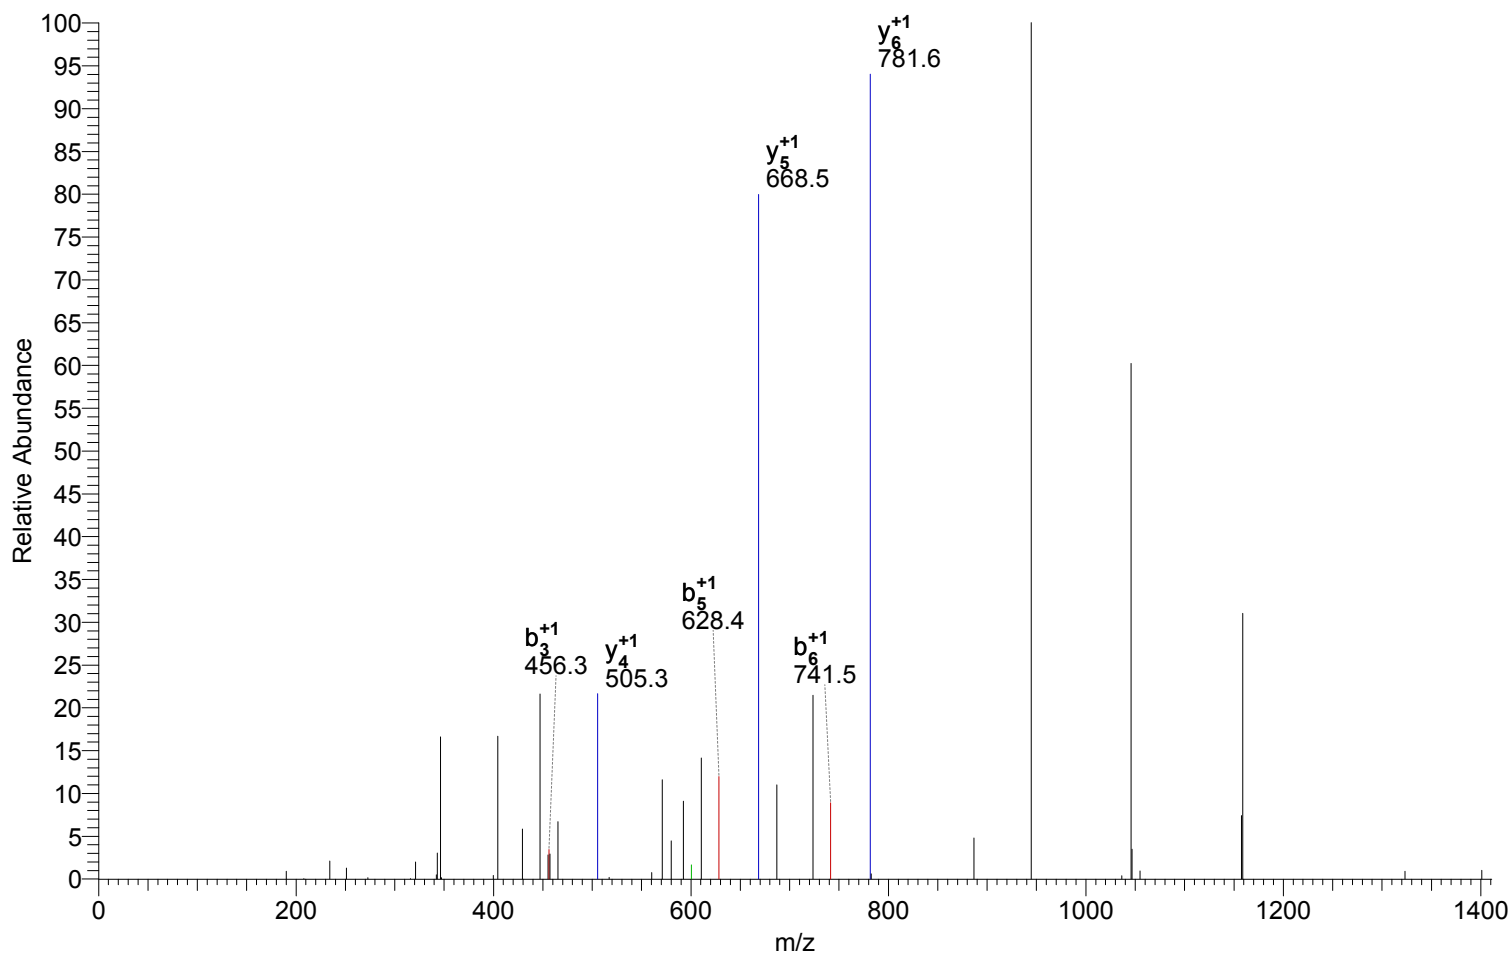

---

| Reference                                                      |             |         |   | P   | Score | Coverage | Accession |     |      |       |
|----------------------------------------------------------------|-------------|---------|---|-----|-------|----------|-----------|-----|------|-------|
| Scan(s)                                                        | Sequence    | MH+     | z | P   | XC    | DeltaCn  | Sp        | RSp | Ions | Count |
| IPI:IPI00028954.1 SWISS-PROT:O60318 TREMBL:B3KT88;B3KWZ4;B3KXE |             |         |   | 1   | 8.1   | 0.0      | 0         |     |      |       |
| 19287468 - 1                                                   | R.TYCRWKS.K | 1129.55 | 2 | 0.9 | 1.258 | 0.606    | 56.9      | 5   | 5/21 |       |

---

1 of 1 peptide matches reported, 0 removed due to filtering

DTA for scans: 19287468-1  
Precursor ion: 565.27  
Mass type: mono  
Mod's: (M\* +15.99492) C=161.01468

Ion series for charge: +1

| AA | A ions        | B ions        | B* ions | Bo ions | C ions | Y ions        | Y* ions | Yo ions | Z ions |
|----|---------------|---------------|---------|---------|--------|---------------|---------|---------|--------|
| T  | 74.06         | 102.05        |         |         |        |               |         |         |        |
| Y  | <b>237.12</b> | <b>265.12</b> |         |         |        | 1028.50       |         |         |        |
| C  | 398.14        | <b>426.13</b> |         |         |        | <b>865.43</b> |         |         |        |
| R  | 554.24        | 582.23        |         |         |        | <b>704.42</b> |         |         |        |
| W  | 740.32        | 768.31        |         |         |        | 548.32        |         |         |        |
| K  | 868.41        | 896.41        |         |         |        | 362.24        |         |         |        |
| S  | 955.45        | 983.44        |         |         |        | 234.14        |         |         |        |
| K  |               |               |         |         |        | 147.11        |         |         |        |

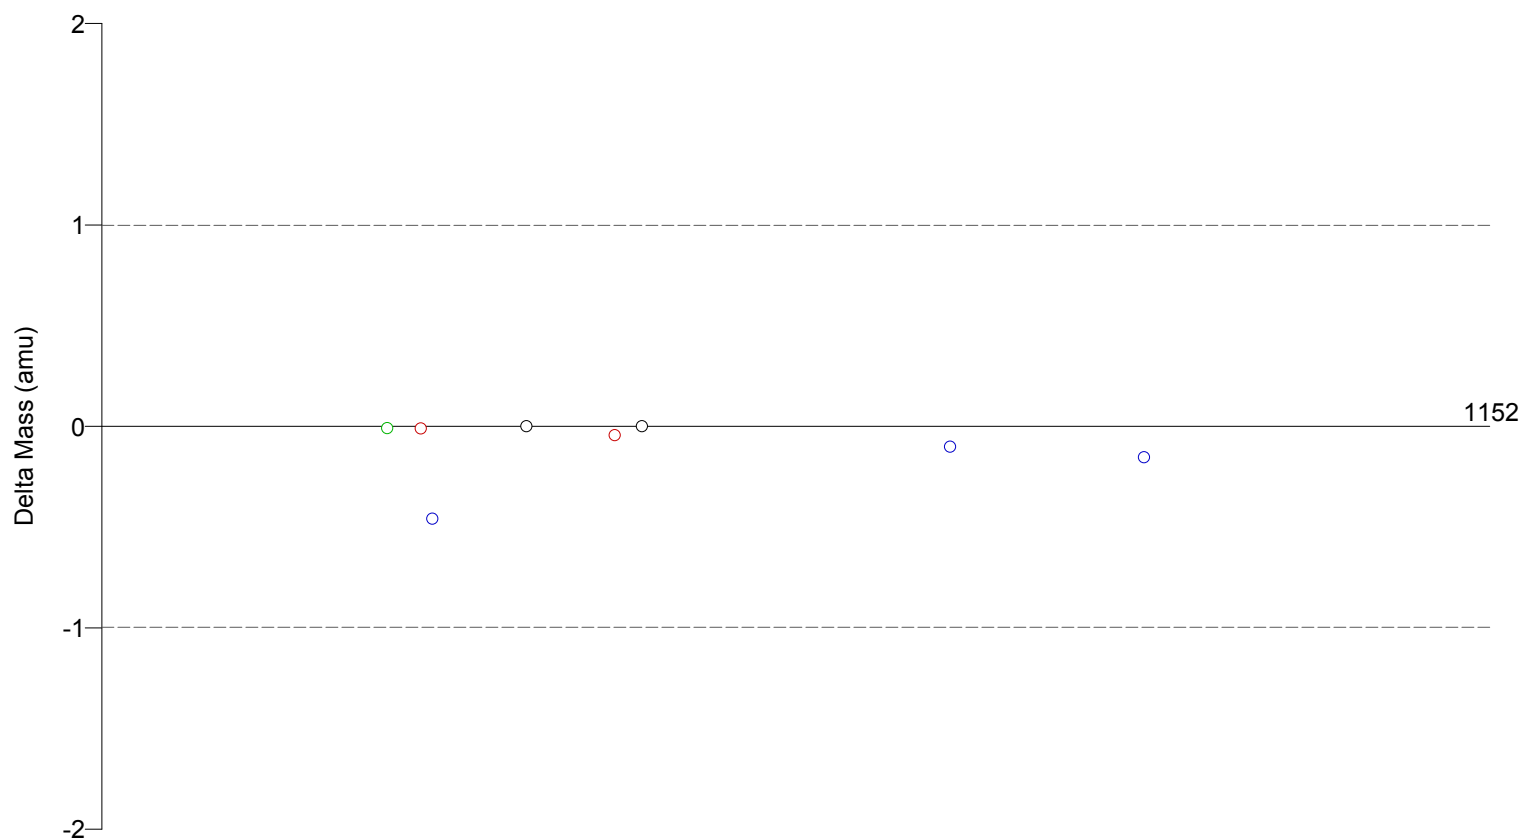

#19287468-1 NL: 1.65E5

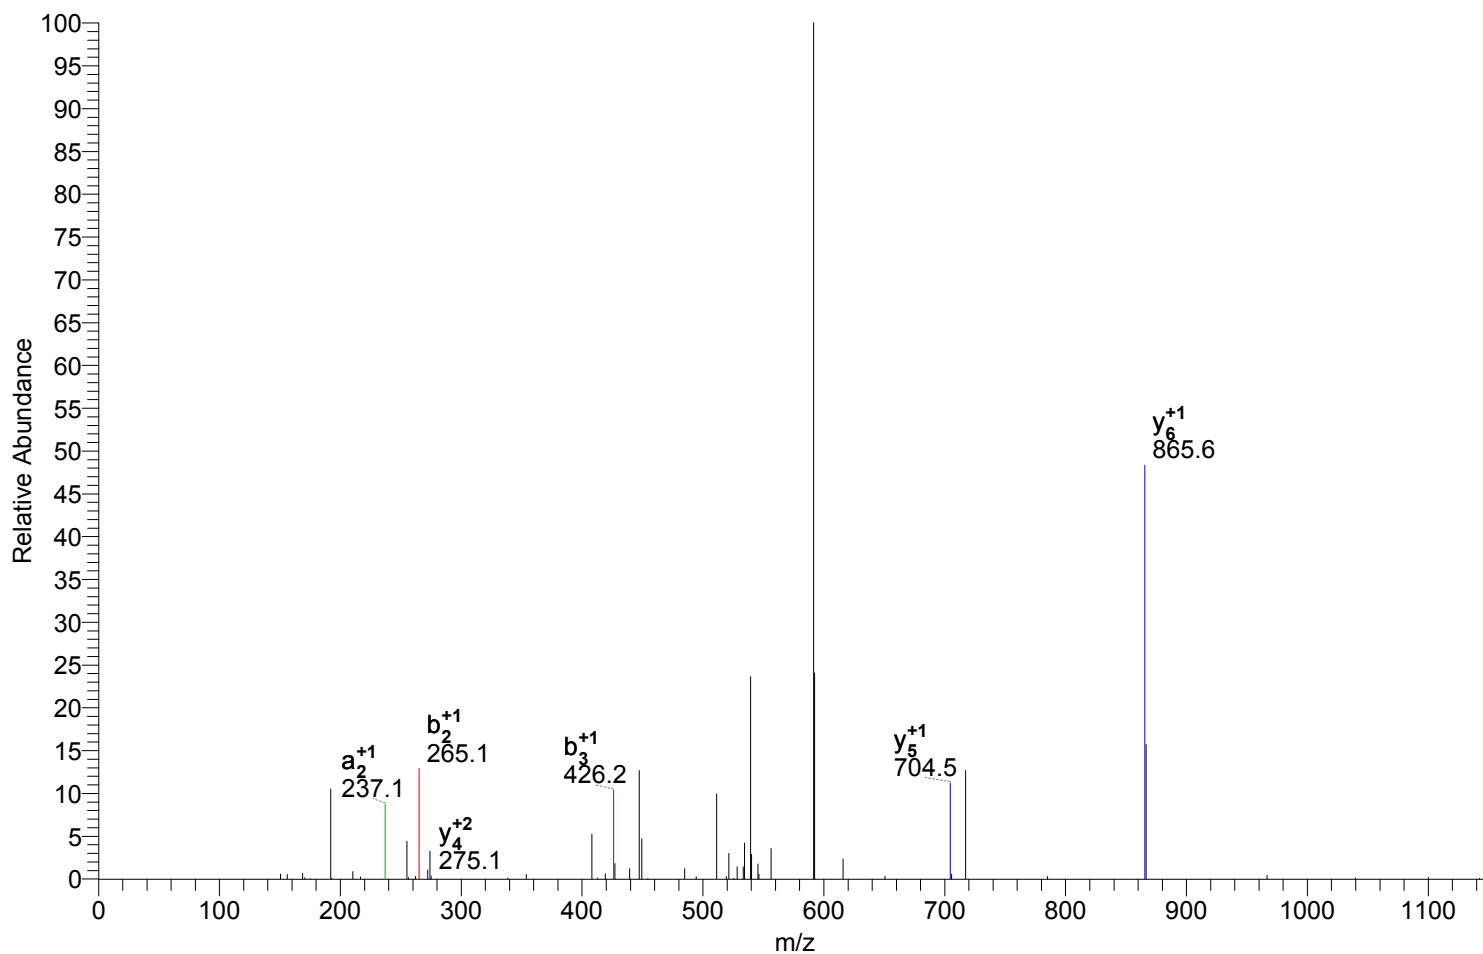

Supplement: NIHMS542160-supplement-Supplementary_Data_1.pdf [file NIHMS542160-supplement-Supplementary_Data_1.pdf]
