# Supplementary material
Source: PubMed Central journal article supplement (PMC3910141)
Supplement: NIHMS542160-supplement-Supplementary_Data_2.pdf [file NIHMS542160-supplement-Supplementary_Data_2.pdf]

# Using ROC Station

athanas@vastscientific.com

110830

# Contents

- What is ROC Station
- Where to get it
- Example on how to use it

# What is ROC Station - 1

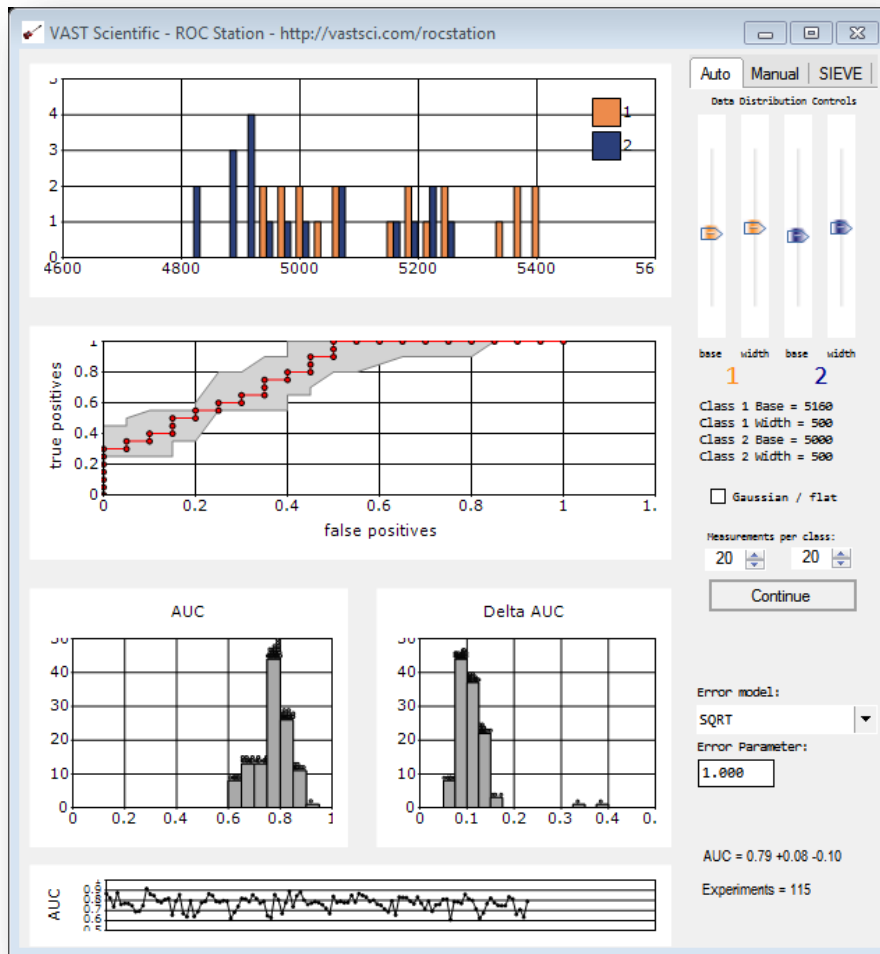

## How to ROC – a learning center

Generate synthetic data to understand the effects of:

- Number of measurements
- Measurement data distributions
- Measurement error models
- Accumulated effects over repeated measurements

# What is ROC Station - 2

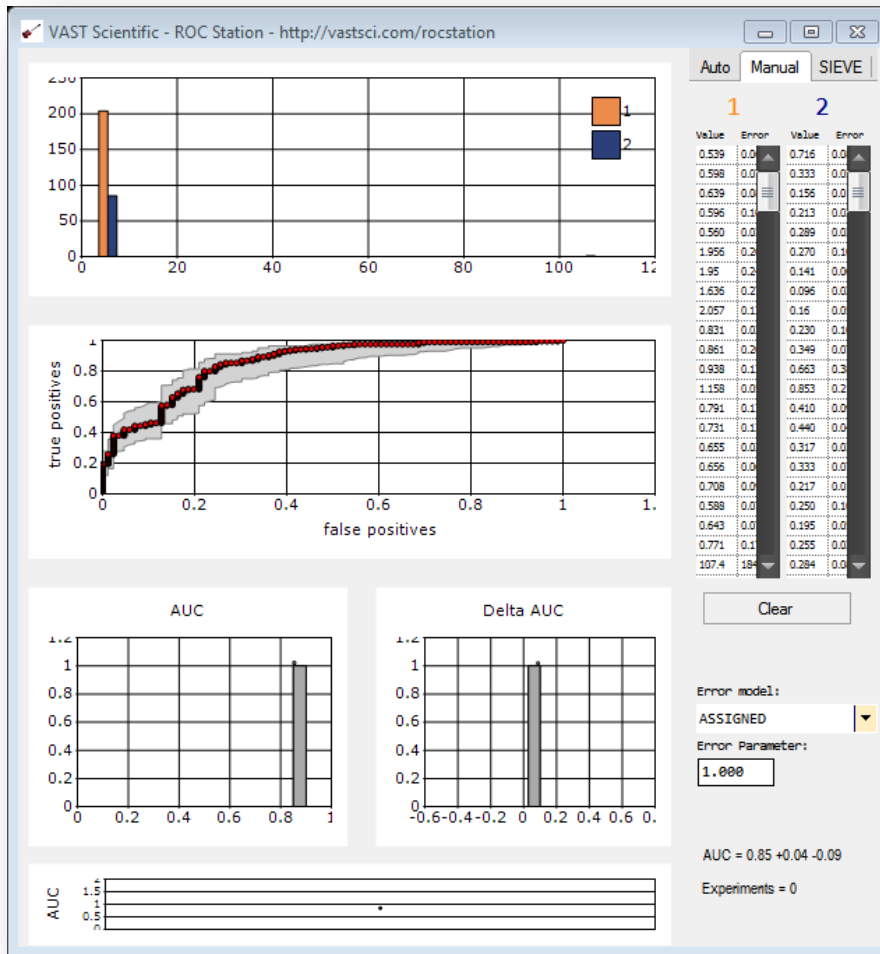

**Measure real data**

Paste in real measurements

Measurements can include assigned errors

# What is ROC Station - 3

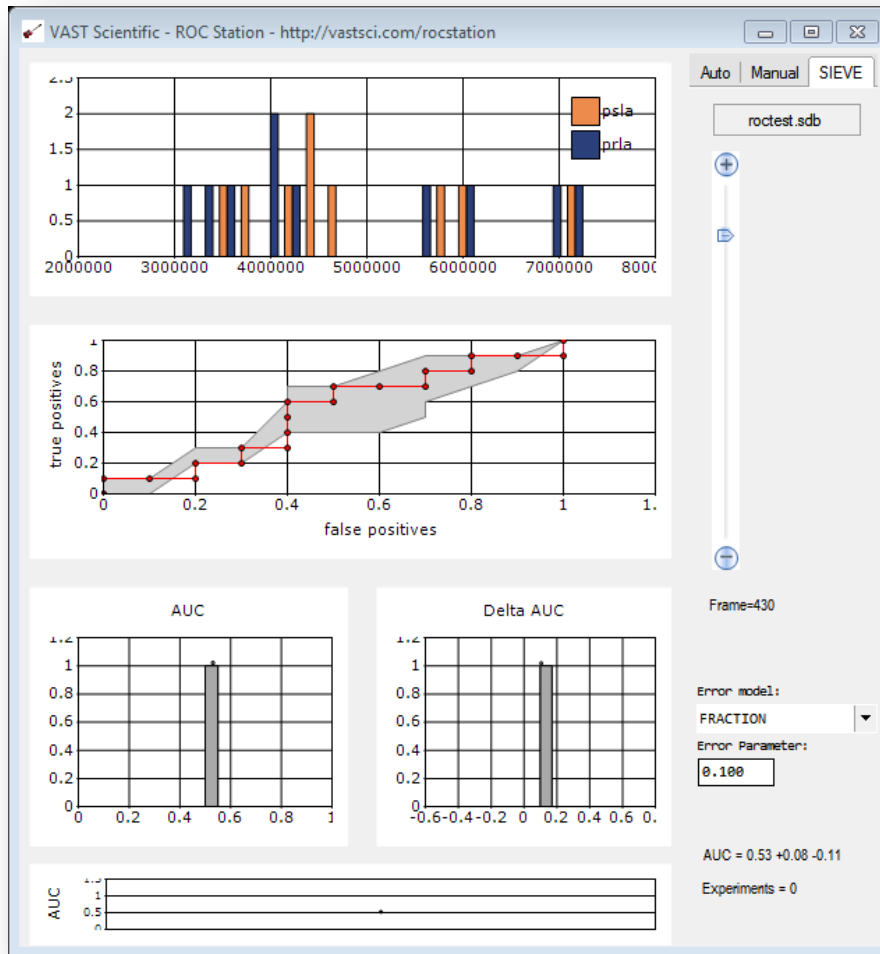

## Explore SIEVE Results

Open a SIEVE result file

Explore the effects of AUC values with different error models.

# Download

ROC Station has been freely contributed to the community by VAST Scientific

For more details, see:

<http://vastscientific.com/rocstation>

Example

# **MULTI-ROC MEASUREMENT**

# Data Set

- LS/MS SIEVE measurements from plasma comparing Ischemic vs Hemorrhagic stroke patients
- Look at APO CIII combined with APO AI



ischemic

# RAW Data

| condition | HEMORR | Average of C1 | StdDev of C1 | Average of A1 | StdDev of A1 | Average of A2 | StdDev of A2 |
|-----------|--------|---------------|--------------|---------------|--------------|---------------|--------------|
| A10       | 0      | 0.716033333   | 0.081248774  | 6.282466667   | 0.992296929  |               |              |
| B10       | 0      | 0.3336        | 0.050093812  | 4.654333333   | 0.50479831   |               |              |
| C10       | 0      | 0.1568        | 0.011957843  | 4.588         | 0.055370887  |               |              |
| D10       | 0      | 0.213333333   | 0.030707848  | 6.953333333   | 1.427554649  |               |              |
| eA1       | 0      | 0.289866667   | 0.032942425  | 7.033         | 0.918651729  |               |              |
| eA2       | 0      | 0.270033333   | 0.10512927   | 6.408666667   | 3.372538707  |               |              |
| eA3       | 0      | 0.141333333   | 0.05678282   | 4.036666667   | 2.151616214  |               |              |
| eA4       | 0      | 0.09499       | 0.034651394  | 2.810666667   | 1.439698695  |               |              |
| eA5       | 0      | 0.16          | 0.051704642  | 3.036333333   | 2.288012311  |               |              |
| eA6       | 0      | 0.230633333   | 0.100640953  | 4.616666667   | 0.866767898  |               |              |
| eA7       | 0      | 0.349633333   | 0.071202341  | 6.535         | 0.9835258    |               |              |
| eA8       | 0      | 0.663066667   | 0.385167422  | 6.460666667   | 2.325768762  |               |              |
| eA9       | 0      | 0.853333333   | 0.214110463  | 7.62          | 1.3368706    |               |              |
| eB1       | 0      | 0.410666667   | 0.093390381  | 6.298333333   | 0.805047906  |               |              |
| eB2       | 0      | 0.440266667   | 0.047250644  | 7.088333333   | 1.065493816  |               |              |
| eB3       | 0      | 0.317233333   | 0.02717254   | 6.379         | 0.826653313  |               |              |
| eB4       | 0      | 0.3333        | 0.07822642   | 4.339333333   | 1.803374707  |               |              |
| eB5       | 0      | 0.2177        | 0.017370089  | 4.747666667   | 0.959938192  |               |              |
| eB6       | 0      | 0.2528        | 0.103400725  | 4.523         | 1.098211188  |               |              |
| eB7       | 0      | 0.195566667   | 0.053479564  | 4.161666667   | 1.678312347  |               |              |
| eB8       | 0      | 0.2556        | 0.035543072  | 5.428333333   | 1.347108137  |               |              |
| eB9       | 0      | 0.284266667   | 0.08110859   | 6.1665        | 0.45042702   |               |              |
| eC1       | 0      | 0.5628        | 0.1123503    | 10.66666667   | 4.978080989  |               |              |
| eC2       | 0      | 0.6322        | 0.03288456   | 8.389333333   | 1.261125027  |               |              |
| eC3       | 0      | 0.272466667   | 0.042118919  | 5.283333333   | 0.46812406   |               |              |
| eC4       | 0      | 0.345633333   | 0.045998297  | 8.821333333   | 0.794873785  |               |              |
| eC5       | 0      | 0.189566667   | 0.01112695   | 6.943333333   | 2.02313033   |               |              |
| eC6       | 0      | 0.212133333   | 0.04005131   | 6.056666667   | 0.547308262  |               |              |
| eD1       | 0      | 0.252066667   | 0.042901787  | 4.853666667   | 0.413367069  |               |              |
| eD2       | 0      | 0.2278        | 0.015629139  | 5.161         | 1.050543193  |               |              |
| eD3       | 0      | 0.1587        | 0.010880717  | 4.020882619   |              |               |              |
| eD4       | 0      | 0.183666667   | 0.01680962   | 4.314666667   | 1.246358429  |               |              |
| eD5       | 0      | 0.249133333   | 0.05516677   | 5.909333333   | 0.568493917  |               |              |
| eD7       | 0      | 0.382166667   | 0.120177591  | 8.093333333   | 3.288191754  |               |              |
| eD8       | 0      | 0.2519        | 0.01430988   | 7.683         | 1.02505366   |               |              |
| eD9       | 0      | 0.2746        | 0.041485793  | 7.810666667   | 2.09640195   |               |              |
| eE1       | 0      | 0.271866667   | 0.01832934   | 4.744666667   | 1.674373321  |               |              |
| eE2       | 0      | 0.283866667   | 0.050434545  | 5.022666667   | 0.8165968    |               |              |
| eE3       | 0      | 0.197733333   | 0.016139806  | 3.701666667   | 0.859907166  |               |              |
| eE4       | 0      | 0.249566667   | 0.02094016   | 3.836666667   | 1.15741148   |               |              |
| eE5       | 0      | 0.320766667   | 0.04656397   | 5.769         | 1.260020778  |               |              |
| eE6       | 0      | 0.496633333   | 0.08051623   | 4.887666667   | 0.190536961  |               |              |
| eF1       | 0      | 0.2118        | 0.054527791  | 5.168333333   | 0.457202234  |               |              |
| eF2       | 0      | 0.2619        | 0.024043918  | 7.943666667   | 1.108629033  |               |              |
| eF3       | 0      | 0.2423        | 0.02833307   | 6.049         | 0.421522241  |               |              |
| eF4       | 0      | 0.328         | 0.029230206  | 6.854         | 0.74816211   |               |              |
| eF5       | 0      | 0.678         | 0.041221718  | 10.09066667   | 0.303707587  |               |              |
| eF6       | 0      | 0.6495        | 0.061097218  | 10.532        | 0.872543409  |               |              |
| eF7       | 0      | 0.343933333   | 0.05403752   | 6.883333333   | 1.099327236  |               |              |
| eF8       | 0      | 0.233666667   | 0.041707593  | 6.308666667   | 1.168941972  |               |              |
| eF9       | 0      | 0.198833333   | 0.005196473  | 5.648666667   | 0.812940547  |               |              |
| eG1       | 0      | 0.275133333   | 0.025854805  | 7.987333333   | 1.44779656   |               |              |
| eG2       | 0      | 0.307266667   | 0.041137858  | 6.928333333   | 1.196472036  |               |              |
| eG3       | 0      | 0.293966667   | 0.050813122  | 7.549         | 1.631304042  |               |              |
| eG4       | 0      | 0.3314        | 0.020949977  | 7.376666667   | 0.540925701  |               |              |
| eG5       | 0      | 0.2702        | 0.019012627  | 6.215666667   | 1.03159176   |               |              |
| eG6       | 0      | 0.404233333   | 0.091963163  | 7.072         | 0.598464457  |               |              |
| eG7       | 0      | 0.3357        | 0.042487292  | 6.299         | 0.78380118   |               |              |
| eG8       | 0      | 0.361933333   | 0.052896723  | 9.557333333   | 1.42587704   |               |              |
| eG9       | 0      | 0.316966667   | 0.030942503  | 8.426666667   | 2.159481728  |               |              |
| eH1       | 0      | 0.322833333   | 0.05558927   | 7.28          | 2.21012948   |               |              |
| eH2       | 0      | 0.3209        | 0.008608717  | 5.169         | 0.61857872   |               |              |
| eH3       | 0      | 0.646433333   | 0.086763003  | 7.406666667   | 0.42018369   |               |              |
| eH4       | 0      | 0.495666667   | 0.072416181  | 11.406333333  | 2.71788463   |               |              |
| eH5       | 0      | 0.442333333   | 0.04427983   | 8.982666667   | 1.089292584  |               |              |
| eH6       | 0      | 0.3864        | 0.08942036   | 9.443         | 1.990579564  |               |              |
| eH7       | 0      | 0.625633333   | 0.06370505   | 10.463333333  | 2.044401404  |               |              |
| eH8       | 0      | 0.924466667   | 0.161196691  | 12.46666667   | 0.747952761  |               |              |
| eH9       | 0      | 0.724866667   | 0.08392071   | 9.6475        | 1.700591809  |               |              |
| eI1       | 0      | 0.3962        | 0.050255388  | 7.748333333   | 1.347616618  |               |              |
| eI2       | 0      | 0.3771        | 0.062801194  | 7.443333333   | 1.713725279  |               |              |
| eI3       | 0      | 0.461766667   | 0.096758273  | 7.678         | 1.58574998   |               |              |
| eI4       | 0      | 0.298333333   | 0.050145028  | 8.490333333   | 0.78898688   |               |              |
| eI5       | 0      | 0.2848        | 0.05053108   | 7.503333333   | 0.75983507   |               |              |
| eI6       | 0      | 0.395866667   | 0.046079883  | 10.885666667  | 1.130440769  |               |              |
| eI7       | 0      | 0.366766667   | 0.040649048  | 8.925666667   | 2.110246887  |               |              |
| eI8       | 0      | 0.537933333   | 0.024615916  | 12.56666667   | 1.025686702  |               |              |
| eI9       | 0      | 0.6364        | 0.035942871  | 13.146666667  | 1.469773225  |               |              |
| eI4       | 0      | 0.6315        | 0.081720864  | 9.509666667   | 2.048133378  |               |              |
| eJ5       | 0      | 0.501933333   | 0.041525794  | 8.836         | 0.692717114  |               |              |
| eJ6       | 0      | 0.3988        | 0.02374448   | 10.273333333  | 1.957915508  |               |              |
| eJ7       | 0      | 0.288866667   | 0.026400063  | 5.715666667   | 0.99749943   |               |              |
| eJ8       | 0      | 0.302033333   | 0.029498878  | 7.658333333   | 1.197740512  |               |              |
| F10       | 0      | 1.199933333   | 0.016274622  | 5.897666667   | 0.748797939  |               |              |
| C10       | 0      | 0.351466667   | 0.018244756  | 6.389333333   | 0.22597725   |               |              |
| H10       | 0      | 0.542266667   | 0.0651652    | 7.673         | 0.656667543  |               |              |

hemorrhagic

# Select Pair Tab

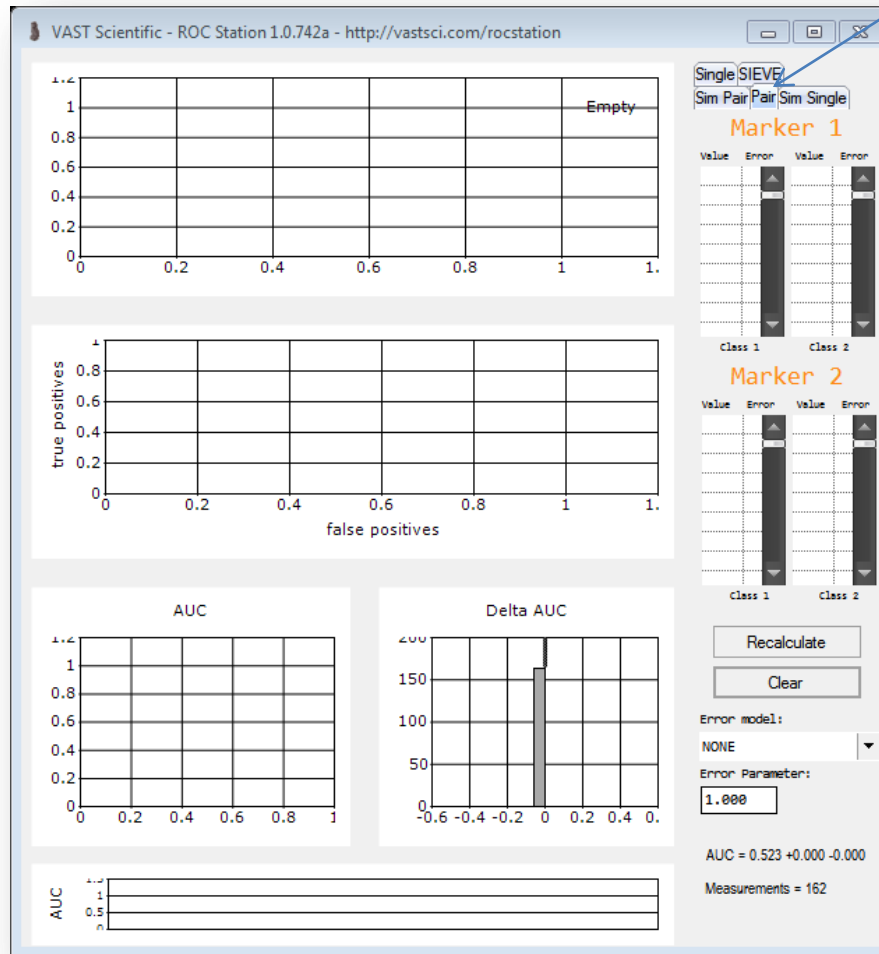

# Insert CII values in the top grids

Hemorrhagic cII

Ischemic cII

*Just use copy/paste from Excel to ROC Station*

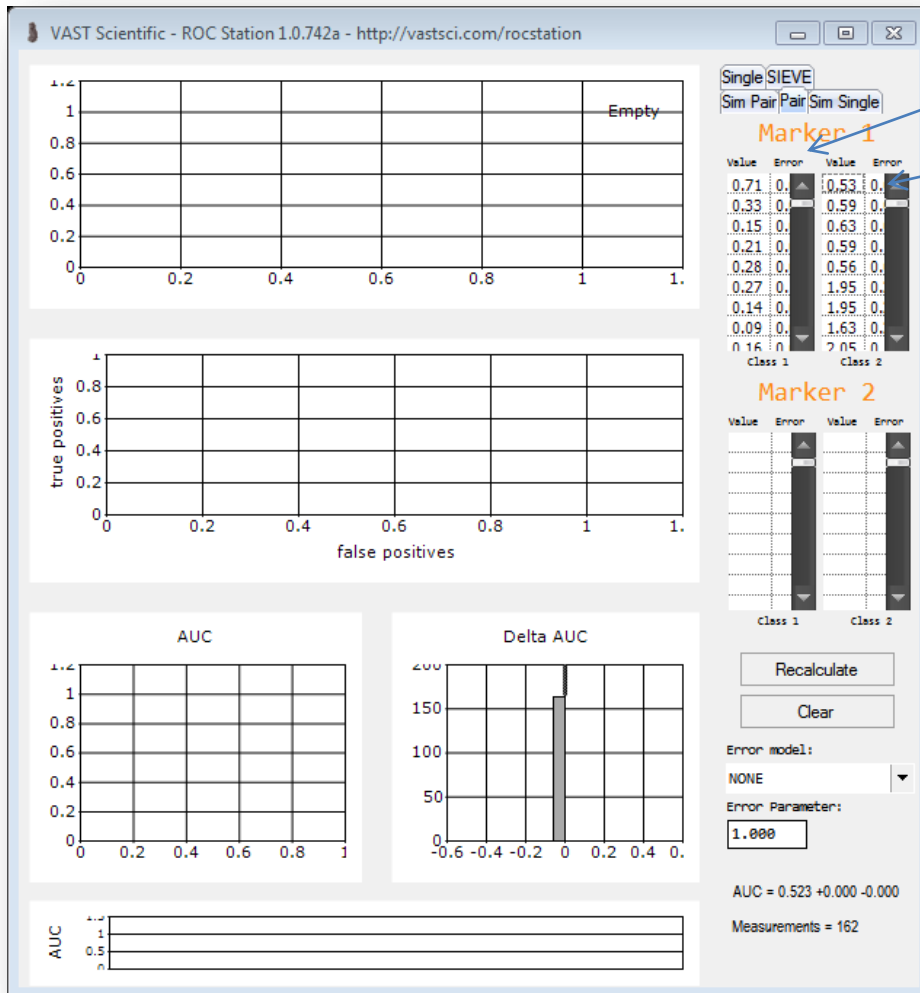

# Insert AI values in the bottom grids

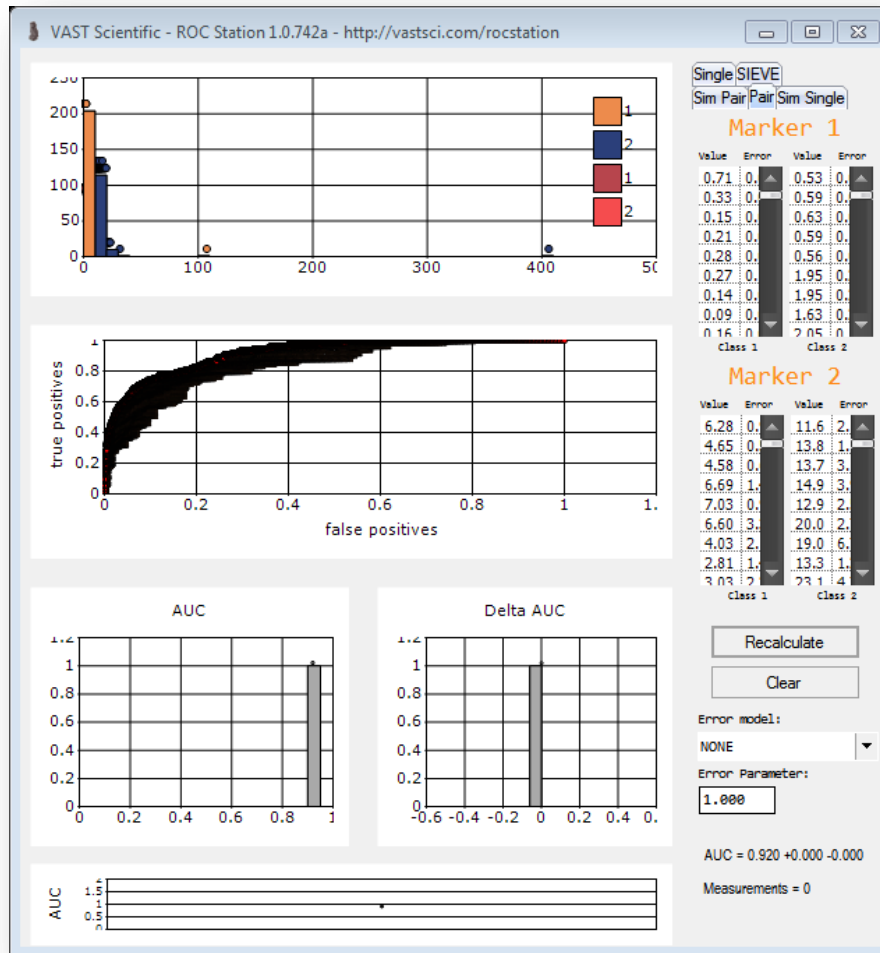

*ROC Station  
begins to calculate  
immediately*

# Error Model

Select ASSIGNED to tell ROC Station to use the standard deviations in the grid

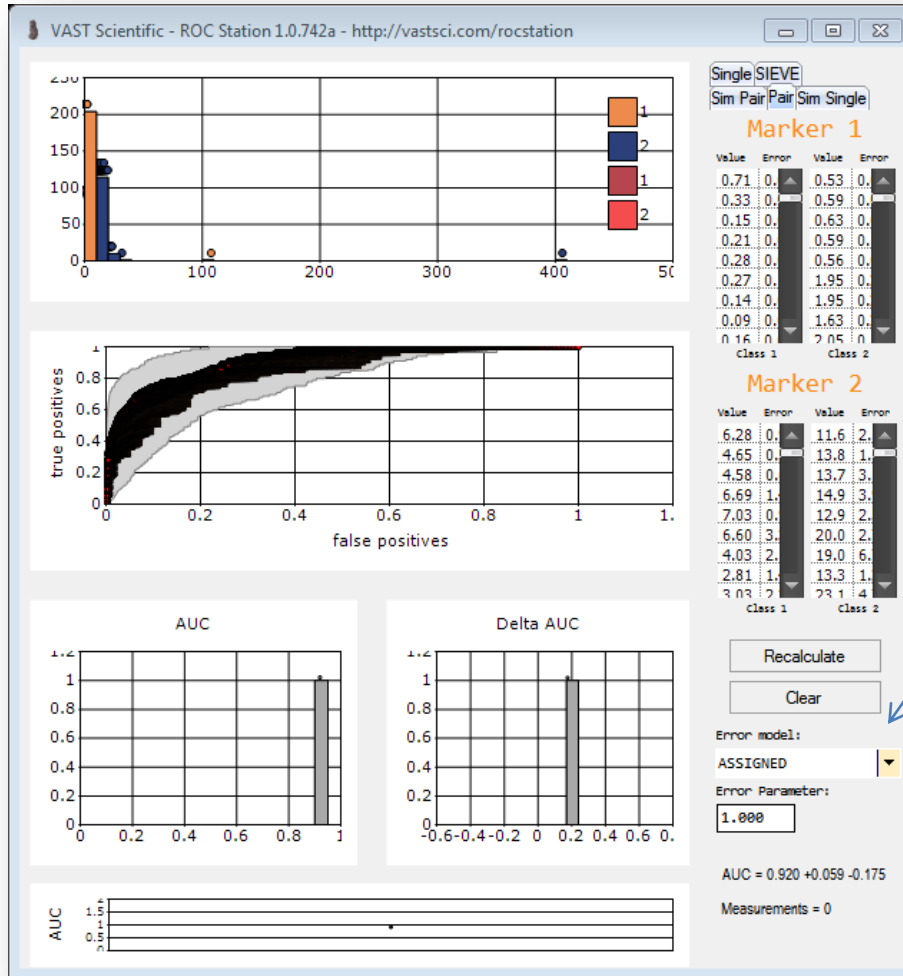

AUC Reported here

Questions, comments, complaints

[athanas@vastscientific.com](mailto:athanas@vastscientific.com)
